# Supplementary material
Source: PubMed Central journal article supplement (PMC2253956)
Supplement: mmc1.pdf [file mmc1.pdf]

**Supplementary Table 1.**

Nonsynonymous SNPs used to compare MAF distributions and intronic ratios between SNPs predicted to be benign, possibly damaging, and probably damaging. SNP functionality was predicted by PolyPhen.

AA –amino acid

| SNP    | acc number | AA1 | AA2 | AA1/AA2 | prediction        |
|--------|------------|-----|-----|---------|-------------------|
| rs47   | XP_371877  | N   | D   | ND      | benign            |
| rs268  | NP_000228  | N   | S   | NS      | benign            |
| rs298  | NP_000228  | V   | M   | VM      | benign            |
| rs300  | NP_000228  | T   | A   | TA      | benign            |
| rs334  | NP_000509  | E   | V   | EV      | possibly damaging |
| rs662  | NP_000437  | Q   | R   | QR      | benign            |
| rs665  | NP_000138  | V   | I   | VI      | benign            |
| rs669  | NP_000005  | V   | I   | VI      | benign            |
| rs671  | NP_000681  | E   | K   | EK      | possibly damaging |
| rs678  | NP_002206  | V   | E   | VE      | probably damaging |
| rs698  | NP_000660  | I   | V   | IV      | benign            |
| rs699  | NP_000020  | M   | T   | MT      | benign            |
| rs704  | NP_000629  | M   | T   | MT      | benign            |
| rs713  | NP_064445  | L   | M   | LM      | benign            |
| rs980  | XP_375718  | L   | I   | LI      | benign            |
| rs1098 | NP_078974  | L   | Q   | LQ      | possibly damaging |
| rs1115 | NP_076946  | E   | K   | EK      | benign            |
| rs1124 | NP_003009  | N   | S   | NS      | benign            |
| rs1208 | NP_000006  | K   | R   | KR      | benign            |
| rs1258 | NP_722516  | M   | T   | MT      | benign            |
| rs1303 | NP_000286  | D   | E   | DE      | benign            |
| rs1320 | NP_009059  | D   | N   | DN      | benign            |
| rs1337 | NP_775933  | L   | F   | LF      | benign            |
| rs1339 | NP_775933  | I   | M   | IM      | benign            |
| rs1395 | NP_066918  | F   | S   | FS      | possibly damaging |
| rs1528 | NP_036271  | K   | E   | KE      | benign            |
| rs1545 | NP_740754  | G   | V   | GV      | probably damaging |
| rs1547 | NP_740754  | R   | C   | RC      | benign            |
| rs1567 | NP_861447  | D   | E   | DE      | benign            |
| rs1576 | NP_061925  | S   | C   | SC      | benign            |
| rs1635 | XP_167149  | T   | N   | TN      | benign            |
| rs1666 | NP_660278  | L   | V   | LV      | benign            |
| rs1716 | NP_002199  | R   | W   | RW      | benign            |
| rs1727 | NP_001538  | E   | D   | ED      | benign            |
| rs1811 | NP_919306  | R   | Q   | RQ      | benign            |
| rs1818 | NP_079107  | T   | I   | TI      | benign            |
| rs1823 | NP_808760  | N   | K   | NK      | benign            |
| rs1823 | NP_060737  | N   | K   | NK      | benign            |
| rs1899 | NP_057097  | H   | R   | HR      | benign            |

|        |           |   |   |    |                   |
|--------|-----------|---|---|----|-------------------|
| rs1921 | NP_005092 | S | N | SN | benign            |
| rs1989 | NP_075379 | P | S | PS | probably damaging |
| rs1991 | NP_079352 | Q | R | QR | benign            |
| rs2240 | NP_002408 | L | V | LV | benign            |
| rs2347 | NP_060589 | S | A | SA | benign            |
| rs2433 | NP_078959 | I | V | IV | benign            |
| rs2435 | NP_932095 | Q | R | QR | benign            |
| rs2436 | NP_932095 | K | T | KT | benign            |
| rs2461 | NP_112241 | L | V | LV | benign            |
| rs2607 | XP_375853 | E | Q | EQ | benign            |
| rs2637 | NP_078993 | R | W | RW | probably damaging |
| rs2640 | NP_055228 | K | R | KR | benign            |
| rs2708 | NP_064579 | E | G | EG | possibly damaging |
| rs2759 | NP_000241 | I | V | IV | benign            |
| rs2791 | NP_057376 | R | H | RH | benign            |
| rs2906 | NP_786924 | Q | P | QP | benign            |
| rs2906 | NP_060578 | Q | P | QP | benign            |
| rs2941 | NP_000829 | V | I | VI | benign            |
| rs3027 | NP_115758 | L | R | LR | possibly damaging |
| rs3085 | XP_114735 | I | V | IV | benign            |
| rs3147 | NP_001143 | I | T | IT | possibly damaging |
| rs3162 | NP_001055 | L | V | LV | benign            |
| rs3308 | NP_005821 | N | D | ND | benign            |
| rs3316 | NP_005740 | K | R | KR | benign            |
| rs3429 | NP_079379 | T | I | TI | benign            |
| rs3501 | NP_031375 | M | V | MV | benign            |
| rs3505 | NP_001307 | V | L | VL | benign            |
| rs3568 | NP_008896 | G | W | GW | possibly damaging |
| rs3575 | NP_002291 | C | Y | CY | probably damaging |
| rs3625 | NP_569736 | T | A | TA | benign            |
| rs4193 | NP_002113 | G | R | GR | possibly damaging |
| rs4220 | NP_005132 | R | K | RK | benign            |
| rs4236 | NP_000891 | A | T | AT | benign            |
| rs4277 | NP_001877 | T | M | TM | benign            |
| rs4303 | NP_000780 | A | S | AS | benign            |
| rs4314 | NP_000780 | R | W | RW | possibly damaging |
| rs4317 | NP_690044 | S | P | SP | benign            |
| rs4317 | NP_690043 | S | P | SP | benign            |
| rs4318 | NP_690044 | S | G | SG | benign            |
| rs4318 | NP_690043 | S | G | SG | benign            |
| rs4364 | NP_000780 | R | S | RS | benign            |
| rs4364 | NP_690043 | R | S | RS | benign            |
| rs4367 | NP_004280 | P | S | PS | benign            |
| rs4524 | NP_000121 | R | K | RK | benign            |
| rs4526 | NP_112246 | A | T | AT | benign            |
| rs4529 | NP_001052 | L | V | LV | benign            |

|        |           |   |   |    |                   |
|--------|-----------|---|---|----|-------------------|
| rs4529 | NP_112246 | L | V | LV | benign            |
| rs4530 | NP_000666 | A | V | AV | benign            |
| rs4531 | NP_000778 | A | S | AS | benign            |
| rs4537 | NP_000489 | N | S | NS | benign            |
| rs4541 | NP_000488 | V | A | VA | possibly damaging |
| rs4544 | NP_000489 | I | T | IT | benign            |
| rs4545 | NP_000489 | G | S | GS | benign            |
| rs4562 | NP_001298 | A | V | AV | benign            |
| rs4581 | NP_000033 | L | V | LV | benign            |
| rs4588 | NP_000574 | T | K | TK | benign            |
| rs4602 | NP_002267 | A | G | AG | benign            |
| rs4619 | NP_000587 | I | M | IM | benign            |
| rs4660 | NP_000573 | R | H | RH | possibly damaging |
| rs4667 | NP_004143 | R | L | RL | benign            |
| rs4673 | NP_000092 | H | Y | HY | possibly damaging |
| rs4678 | XP_373419 | R | Q | RQ | benign            |
| rs4680 | NP_009294 | V | M | VM | benign            |
| rs4688 | NP_006423 | P | L | PL | probably damaging |
| rs4723 | NP_004699 | E | K | EK | benign            |
| rs4731 | NP_004453 | K | R | KR | benign            |
| rs4737 | XP_496169 | A | T | AT | benign            |
| rs4740 | NP_005746 | V | I | VI | benign            |
| rs4756 | NP_932172 | I | V | IV | benign            |
| rs4760 | NP_002650 | L | P | LP | possibly damaging |
| rs4762 | NP_000020 | T | K | TK | possibly damaging |
| rs4767 | NP_002055 | D | Y | DY | probably damaging |
| rs4774 | NP_000237 | A | G | AG | benign            |
| rs4775 | XP_208356 | P | L | PL | probably damaging |
| rs4779 | XP_495870 | I | F | IF | possibly damaging |
| rs4784 | NP_002467 | G | V | GV | probably damaging |
| rs4785 | NP_002711 | V | L | VL | possibly damaging |
| rs4807 | NP_005733 | K | R | KR | benign            |
| rs4812 | NP_002611 | H | D | HD | probably damaging |
| rs4816 | NP_005380 | V | I | VI | benign            |
| rs4830 | NP_982297 | C | R | CR | benign            |
| rs4830 | NP_064514 | C | R | CR | benign            |
| rs4845 | NP_114107 | R | Q | RQ | benign            |
| rs4864 | XP_372191 | V | L | VL | benign            |
| rs4866 | NP_945191 | V | M | VM | benign            |
| rs4866 | NP_945192 | V | M | VM | benign            |
| rs4870 | NP_003811 | K | R | KR | benign            |
| rs4872 | NP_996740 | D | N | DN | benign            |
| rs4873 | NP_004356 | V | L | VL | benign            |
| rs4877 | NP_003678 | G | C | GC | probably damaging |
| rs4878 | NP_005331 | G | R | GR | possibly damaging |
| rs4879 | XP_371380 | E | D | ED | benign            |

|        |           |   |   |    |                   |
|--------|-----------|---|---|----|-------------------|
| rs4880 | NP_000627 | V | A | VA | benign            |
| rs4883 | NP_005611 | T | P | TP | benign            |
| rs4893 | NP_001416 | I | V | IV | benign            |
| rs4894 | NP_877962 | Q | P | QP | possibly damaging |
| rs4896 | NP_002098 | L | F | LF | benign            |
| rs4907 | NP_002786 | M | L | ML | benign            |
| rs4909 | NP_006004 | S | N | SN | benign            |
| rs4911 | NP_005792 | Q | K | QK | probably damaging |
| rs4917 | NP_001613 | T | M | TM | benign            |
| rs4918 | NP_001613 | T | S | TS | benign            |
| rs4919 | NP_009035 | Q | K | QK | probably damaging |
| rs4920 | NP_004654 | K | N | KN | benign            |
| rs4922 | NP_002801 | P | R | PR | probably damaging |
| rs4923 | NP_002086 | E | K | EK | benign            |
| rs4925 | NP_004823 | A | D | AD | benign            |
| rs4926 | NP_000053 | V | M | VM | benign            |
| rs4929 | NP_006818 | S | Y | SY | benign            |
| rs4930 | NP_008960 | A | G | AG | benign            |
| rs4945 | NP_005919 | R | S | RS | benign            |
| rs4948 | NP_001741 | A | V | AV | benign            |
| rs4948 | NP_775083 | A | V | AV | benign            |
| rs4948 | NP_775084 | A | V | AV | benign            |
| rs4948 | NP_775085 | A | V | AV | benign            |
| rs4961 | NP_789771 | G | W | GW | possibly damaging |
| rs4961 | NP_001110 | G | W | GW | possibly damaging |
| rs4961 | NP_054908 | G | W | GW | probably damaging |
| rs4961 | NP_054909 | G | W | GW | probably damaging |
| rs4962 | NP_054908 | N | I | NI | probably damaging |
| rs4962 | NP_054909 | N | I | NI | probably damaging |
| rs4962 | NP_789771 | N | I | NI | probably damaging |
| rs4962 | NP_001110 | N | I | NI | probably damaging |
| rs4963 | NP_054908 | S | C | SC | benign            |
| rs4963 | NP_054909 | S | C | SC | benign            |
| rs4963 | NP_789771 | S | C | SC | benign            |
| rs4963 | NP_001110 | S | C | SC | benign            |
| rs4971 | NP_054908 | Y | N | YN | probably damaging |
| rs4971 | NP_054909 | Y | N | YN | probably damaging |
| rs4971 | NP_789771 | Y | N | YN | probably damaging |
| rs4971 | NP_001110 | Y | N | YN | probably damaging |
| rs4972 | NP_054908 | E | D | ED | benign            |
| rs4972 | NP_054909 | E | D | ED | benign            |
| rs4972 | NP_789771 | E | D | ED | benign            |
| rs4972 | NP_001110 | E | D | ED | benign            |
| rs4976 | NP_690044 | I | T | IT | benign            |
| rs4976 | NP_000780 | I | T | IT | benign            |
| rs4976 | NP_690043 | I | T | IT | benign            |

|        |           |   |   |    |                   |
|--------|-----------|---|---|----|-------------------|
| rs4980 | NP_000780 | R | Q | RQ | benign            |
| rs4980 | NP_690043 | R | Q | RQ | benign            |
| rs4981 | NP_000780 | Q | P | QP | possibly damaging |
| rs4981 | NP_690043 | Q | P | QP | possibly damaging |
| rs4982 | NP_059519 | E | D | ED | benign            |
| rs4982 | NP_059522 | E | D | ED | benign            |
| rs4982 | NP_001608 | E | D | ED | benign            |
| rs4985 | NP_059517 | S | R | SR | benign            |
| rs4985 | NP_059519 | S | R | SR | benign            |
| rs4985 | NP_001608 | S | R | SR | benign            |
| rs4985 | NP_059520 | S | R | SR | possibly damaging |
| rs4986 | NP_059517 | D | N | DN | benign            |
| rs4986 | NP_059520 | D | N | DN | benign            |
| rs4986 | NP_059522 | D | N | DN | possibly damaging |
| rs4986 | NP_001608 | D | N | DN | possibly damaging |
| rs4990 | NP_000666 | R | H | RH | benign            |
| rs4994 | NP_000016 | W | R | WR | probably damaging |
| rs4995 | NP_000016 | T | M | TM | benign            |
| rs5005 | NP_001115 | S | R | SR | possibly damaging |
| rs5018 | NP_000333 | I | F | IF | benign            |
| rs5019 | NP_000333 | M | L | ML | benign            |
| rs5022 | NP_000333 | I | V | IV | benign            |
| rs5023 | NP_000333 | S | G | SG | possibly damaging |
| rs5025 | NP_000333 | R | H | RH | probably damaging |
| rs5026 | NP_000333 | V | I | VI | benign            |
| rs5035 | NP_000333 | D | A | DA | possibly damaging |
| rs5036 | NP_000333 | K | E | KE | benign            |
| rs5037 | NP_000333 | R | S | RS | possibly damaging |
| rs5041 | NP_000020 | L | R | LR | benign            |
| rs5054 | NP_001619 | I | F | IF | possibly damaging |
| rs5056 | NP_001619 | H | L | HL | probably damaging |
| rs5057 | NP_001619 | L | V | LV | benign            |
| rs5061 | NP_001619 | G | S | GS | benign            |
| rs5062 | NP_001619 | T | I | TI | benign            |
| rs5063 | NP_006163 | V | M | VM | benign            |
| rs5122 | NP_000474 | E | K | EK | benign            |
| rs5126 | NP_000474 | K | Q | KQ | benign            |
| rs5167 | NP_001637 | L | R | LR | probably damaging |
| rs5168 | NP_001637 | Q | L | QL | probably damaging |
| rs5170 | NP_059992 | I | L | IL | benign            |
| rs5170 | NP_150643 | I | L | IL | benign            |
| rs5170 | NP_004622 | I | L | IL | benign            |
| rs5171 | NP_059992 | S | T | ST | benign            |
| rs5171 | NP_150643 | S | T | ST | benign            |
| rs5171 | NP_004622 | S | T | ST | benign            |
| rs5172 | NP_059992 | R | Q | RQ | benign            |

|        |           |   |   |    |                   |
|--------|-----------|---|---|----|-------------------|
| rs5172 | NP_150643 | R | Q | RQ | benign            |
| rs5172 | NP_004622 | R | Q | RQ | benign            |
| rs5174 | NP_059992 | R | Q | RQ | benign            |
| rs5174 | NP_150643 | R | Q | RQ | benign            |
| rs5180 | NP_059992 | V | M | VM | benign            |
| rs5180 | NP_150643 | V | M | VM | benign            |
| rs5181 | NP_059992 | W | C | WC | probably damaging |
| rs5181 | NP_150643 | W | C | WC | probably damaging |
| rs5181 | NP_004622 | W | C | WC | probably damaging |
| rs5191 | NP_000677 | R | K | RK | benign            |
| rs5195 | NP_000481 | P | L | PL | benign            |
| rs5196 | NP_000045 | T | S | TS | benign            |
| rs5198 | NP_000045 | A | V | AV | benign            |
| rs5200 | NP_000045 | A | V | AV | benign            |
| rs5215 | NP_000516 | V | I | VI | benign            |
| rs5217 | NP_000516 | R | H | RH | possibly damaging |
| rs5219 | NP_000516 | E | K | EK | benign            |
| rs5227 | NP_002512 | R | L | RL | benign            |
| rs5229 | NP_002512 | R | H | RH | benign            |
| rs5230 | NP_002512 | M | L | ML | benign            |
| rs5232 | NP_001718 | T | P | TP | possibly damaging |
| rs5234 | NP_001718 | L | Q | LQ | possibly damaging |
| rs5239 | NP_001732 | D | N | DN | benign            |
| rs5241 | NP_001732 | S | R | SR | benign            |
| rs5246 | NP_001827 | G | R | GR | possibly damaging |
| rs5247 | NP_001827 | H | R | HR | probably damaging |
| rs5251 | NP_000076 | V | L | VL | benign            |
| rs5253 | NP_000076 | T | M | TM | benign            |
| rs5256 | NP_000076 | S | R | SR | benign            |
| rs5259 | NP_000076 | N | H | NH | benign            |
| rs5267 | NP_077720 | R | Q | RQ | benign            |
| rs5272 | NP_000954 | E | G | EG | probably damaging |
| rs5273 | NP_000954 | V | A | VA | benign            |
| rs5288 | NP_000488 | F | L | FL | benign            |
| rs5291 | NP_000488 | S | N | SN | benign            |
| rs5292 | NP_000488 | L | V | LV | benign            |
| rs5308 | NP_000489 | N | T | NT | benign            |
| rs5312 | NP_000488 | E | V | EV | probably damaging |
| rs5312 | NP_000489 | E | V | EV | probably damaging |
| rs5317 | NP_000489 | F | V | FV | probably damaging |
| rs5319 | NP_000778 | E | Q | EQ | benign            |
| rs5320 | NP_000778 | A | T | AT | benign            |
| rs5321 | NP_000778 | K | N | KN | benign            |
| rs5323 | NP_000778 | E | Q | EQ | benign            |
| rs5324 | NP_000778 | D | N | DN | benign            |
| rs5325 | NP_000778 | L | P | LP | possibly damaging |

|        |           |   |   |    |                   |
|--------|-----------|---|---|----|-------------------|
| rs5327 | NP_000785 | T | P | TP | possibly damaging |
| rs5328 | NP_000785 | T | R | TR | possibly damaging |
| rs5330 | NP_000785 | R | S | RS | possibly damaging |
| rs5331 | NP_000785 | S | A | SA | benign            |
| rs5345 | NP_003982 | L | Q | LQ | benign            |
| rs5345 | NP_000106 | L | Q | LQ | benign            |
| rs5346 | NP_003982 | L | F | LF | benign            |
| rs5346 | NP_000106 | L | F | LF | benign            |
| rs5347 | NP_000106 | F | V | FV | possibly damaging |
| rs5347 | NP_003982 | F | V | FV | probably damaging |
| rs5350 | NP_003982 | T | M | TM | possibly damaging |
| rs5350 | NP_000106 | T | M | TM | possibly damaging |
| rs5352 | NP_003982 | S | N | SN | benign            |
| rs5352 | NP_000106 | S | N | SN | benign            |
| rs5361 | NP_000441 | S | R | SR | possibly damaging |
| rs5364 | NP_000441 | E | K | EK | benign            |
| rs5366 | NP_000441 | E | Q | EQ | benign            |
| rs5368 | NP_000441 | Y | H | YH | probably damaging |
| rs5370 | NP_001946 | N | K | NK | benign            |
| rs5376 | NP_001471 | N | S | NS | benign            |
| rs5377 | NP_001471 | P | L | PL | probably damaging |
| rs5388 | NP_072053 | V | I | VI | benign            |
| rs5388 | NP_072054 | V | I | VI | benign            |
| rs5388 | NP_000506 | V | I | VI | benign            |
| rs5389 | NP_072051 | R | W | RW | possibly damaging |
| rs5389 | NP_072050 | R | W | RW | possibly damaging |
| rs5389 | NP_072052 | R | W | RW | probably damaging |
| rs5389 | NP_002050 | R | W | RW | probably damaging |
| rs5392 | NP_000155 | L | V | LV | benign            |
| rs5397 | NP_000331 | L | V | LV | benign            |
| rs5400 | NP_000331 | T | I | TI | possibly damaging |
| rs5434 | NP_001033 | T | S | TS | benign            |
| rs5442 | NP_002066 | G | S | GS | possibly damaging |
| rs5444 | NP_002066 | W | L | WL | probably damaging |
| rs5447 | NP_002094 | M | V | MV | benign            |
| rs5450 | NP_002094 | E | Q | EQ | benign            |
| rs5453 | NP_002094 | P | A | PA | probably damaging |
| rs5455 | NP_002094 | I | M | IM | possibly damaging |
| rs5456 | NP_002094 | K | E | KE | possibly damaging |
| rs5461 | NP_002094 | N | S | NS | possibly damaging |
| rs5465 | NP_002094 | E | G | EG | benign            |
| rs5491 | NP_000192 | K | M | KM | benign            |
| rs5492 | NP_000192 | K | N | KN | benign            |
| rs5495 | NP_000192 | V | M | VM | benign            |
| rs5497 | NP_000192 | R | Q | RQ | possibly damaging |
| rs5498 | NP_000192 | E | K | EK | benign            |

|        |           |   |   |    |                   |
|--------|-----------|---|---|----|-------------------|
| rs5503 | NP_000864 | A | T | AT | benign            |
| rs5504 | NP_000864 | R | H | RH | benign            |
| rs5515 | NP_002248 | R | H | RH | probably damaging |
| rs5516 | NP_002248 | E | Q | EQ | benign            |
| rs5517 | NP_002248 | K | E | KE | benign            |
| rs5518 | NP_002248 | V | E | VE | benign            |
| rs5522 | NP_000892 | I | V | IV | benign            |
| rs5523 | NP_000892 | N | T | NT | benign            |
| rs5526 | NP_000892 | R | Q | RQ | possibly damaging |
| rs5527 | NP_000892 | N | S | NS | benign            |
| rs5557 | NP_066920 | E | V | EV | probably damaging |
| rs5558 | NP_001034 | F | C | FC | benign            |
| rs5559 | NP_001034 | Y | H | YH | possibly damaging |
| rs5563 | NP_001034 | N | T | NT | benign            |
| rs5565 | NP_001034 | V | L | VL | benign            |
| rs5566 | NP_001034 | A | P | AP | possibly damaging |
| rs5567 | NP_001034 | N | S | NS | benign            |
| rs5570 | NP_001034 | K | R | KR | benign            |
| rs5571 | NP_000896 | L | M | LM | benign            |
| rs5578 | NP_000900 | K | T | KT | possibly damaging |
| rs5584 | NP_000952 | P | S | PS | possibly damaging |
| rs5622 | NP_000952 | S | R | SR | benign            |
| rs5623 | NP_000952 | E | A | EA | benign            |
| rs5624 | NP_000952 | F | L | FL | benign            |
| rs5626 | NP_000952 | R | C | RC | possibly damaging |
| rs5632 | NP_000919 | D | A | DA | benign            |
| rs5635 | NP_000919 | N | T | NT | benign            |
| rs5636 | NP_000919 | N | K | NK | possibly damaging |
| rs5639 | NP_002677 | S | C | SC | benign            |
| rs5640 | NP_002677 | L | H | LH | benign            |
| rs5641 | NP_002677 | L | Q | LQ | probably damaging |
| rs5642 | NP_002677 | R | H | RH | possibly damaging |
| rs5643 | NP_002677 | W | R | WR | possibly damaging |
| rs5650 | NP_002045 | A | V | AV | benign            |
| rs5658 | NP_009048 | L | V | LV | benign            |
| rs5670 | NP_000948 | M | L | ML | benign            |
| rs5670 | NP_942005 | M | L | ML | benign            |
| rs5670 | NP_942008 | M | L | ML | benign            |
| rs5670 | NP_942009 | M | L | ML | benign            |
| rs5670 | NP_942010 | M | L | ML | benign            |
| rs5670 | NP_942011 | M | L | ML | benign            |
| rs5670 | NP_942006 | M | L | ML | benign            |
| rs5670 | NP_942013 | M | L | ML | benign            |
| rs5694 | NP_942013 | P | L | PL | probably damaging |
| rs5713 | NP_005613 | L | P | LP | probably damaging |
| rs5713 | NP_973729 | L | P | LP | probably damaging |



|        |           |   |   |    |                   |
|--------|-----------|---|---|----|-------------------|
| rs5716 | NP_005613 | K | N | KN | benign            |
| rs5716 | NP_973729 | K | N | KN | benign            |
| rs5733 | NP_001030 | G | C | GC | probably damaging |
| rs5736 | NP_001030 | G | S | GS | benign            |
| rs5743 | NP_001051 | C | S | CS | probably damaging |
| rs5744 | NP_001051 | V | E | VE | possibly damaging |
| rs5746 | NP_001051 | E | V | EV | possibly damaging |
| rs5749 | NP_001051 | A | T | AT | benign            |
| rs5750 | NP_001051 | V | E | VE | possibly damaging |
| rs5751 | NP_001051 | V | I | VI | benign            |
| rs5760 | NP_001052 | G | V | GV | probably damaging |
| rs5760 | NP_112246 | G | V | GV | probably damaging |
| rs5762 | NP_001052 | R | C | RC | probably damaging |
| rs5762 | NP_112246 | R | C | RC | probably damaging |
| rs5763 | NP_112246 | T | N | TN | benign            |
| rs5768 | NP_001052 | D | E | DE | benign            |
| rs5768 | NP_112246 | D | E | DE | benign            |
| rs5769 | NP_112246 | K | E | KE | benign            |
| rs5770 | NP_001052 | R | G | RG | probably damaging |
| rs5770 | NP_112246 | R | G | RG | probably damaging |
| rs5771 | NP_001052 | Q | K | QK | benign            |
| rs5771 | NP_112246 | Q | K | QK | benign            |
| rs5774 | NP_003292 | N | K | NK | possibly damaging |
| rs5789 | NP_000953 | L | M | LM | benign            |
| rs5789 | NP_542158 | L | M | LM | benign            |
| rs5791 | NP_542158 | K | R | KR | benign            |
| rs5791 | NP_000953 | K | R | KR | possibly damaging |
| rs5792 | NP_000953 | I | V | IV | benign            |
| rs5792 | NP_542158 | I | V | IV | benign            |
| rs5793 | NP_000953 | K | E | KE | possibly damaging |
| rs5793 | NP_542158 | K | E | KE | possibly damaging |
| rs5794 | NP_000953 | V | I | VI | benign            |
| rs5794 | NP_542158 | V | I | VI | benign            |
| rs5798 | NP_001947 | F | L | FL | benign            |
| rs5811 | NP_006507 | K | T | KT | possibly damaging |
| rs5816 | NP_000898 | Q | E | QE | benign            |
| rs5816 | NP_003986 | Q | E | QE | benign            |
| rs5880 | NP_000069 | A | P | AP | benign            |
| rs5881 | NP_000069 | G | S | GS | possibly damaging |
| rs5882 | NP_000069 | I | V | IV | benign            |
| rs5887 | NP_000069 | V | M | VM | benign            |
| rs5893 | NP_001983 | S | G | SG | benign            |
| rs5896 | NP_000497 | T | M | TM | possibly damaging |
| rs5897 | NP_000497 | P | T | PT | probably damaging |
| rs5901 | NP_001984 | R | W | RW | benign            |
| rs5904 | NP_000176 | T | M | TM | possibly damaging |

|        |           |   |   |    |                   |
|--------|-----------|---|---|----|-------------------|
| rs5905 | NP_000176 | A | T | AT | benign            |
| rs5907 | NP_000176 | R | H | RH | possibly damaging |
| rs5908 | NP_000850 | I | V | IV | benign            |
| rs5911 | NP_000410 | I | S | IS | benign            |
| rs5914 | NP_000410 | Y | N | YN | probably damaging |
| rs5915 | NP_000410 | T | I | TI | possibly damaging |
| rs5917 | NP_000203 | R | Q | RQ | possibly damaging |
| rs5918 | NP_000203 | L | P | LP | benign            |
| rs5921 | NP_000203 | V | I | VI | benign            |
| rs5928 | NP_000518 | R | Q | RQ | benign            |
| rs5931 | NP_000518 | G | R | GR | probably damaging |
| rs5932 | NP_000518 | V | I | VI | benign            |
| rs5934 | NP_000228 | A | T | AT | benign            |
| rs5938 | NP_000943 | A | D | AD | benign            |
| rs5939 | NP_000943 | N | S | NS | benign            |
| rs5940 | NP_006278 | V | M | VM | benign            |
| rs5941 | NP_005130 | F | S | FS | probably damaging |
| rs5948 | NP_005130 | I | N | IN | possibly damaging |
| rs5949 | NP_005130 | P | L | PL | probably damaging |
| rs5951 | NP_005130 | S | N | SN | benign            |
| rs5954 | NP_001638 | S | L | SL | possibly damaging |
| rs5955 | NP_001638 | T | K | TK | possibly damaging |
| rs5961 | NP_000495 | Q | H | QH | benign            |
| rs5967 | NP_000119 | C | F | CF | probably damaging |
| rs5968 | NP_000119 | P | L | PL | possibly damaging |
| rs5969 | NP_000119 | Q | R | QR | benign            |
| rs5972 | NP_000119 | I | F | IF | possibly damaging |
| rs5982 | NP_000120 | P | L | PL | benign            |
| rs5983 | NP_000120 | L | Q | LQ | benign            |
| rs5984 | NP_000120 | T | I | TI | benign            |
| rs5985 | NP_000120 | V | L | VL | benign            |
| rs5987 | NP_000120 | V | I | VI | benign            |
| rs5988 | NP_000120 | Q | E | QE | benign            |
| rs5991 | NP_001985 | E | V | EV | possibly damaging |
| rs5999 | NP_001985 | H | R | HR | benign            |
| rs6000 | NP_001985 | D | E | DE | benign            |
| rs6001 | NP_001985 | Y | S | YS | probably damaging |
| rs6002 | NP_001985 | M | V | MV | benign            |
| rs6003 | NP_001985 | H | R | HR | benign            |
| rs6005 | NP_000121 | H | Q | HQ | possibly damaging |
| rs6007 | NP_000121 | E | A | EA | benign            |
| rs6011 | NP_000121 | T | S | TS | benign            |
| rs6018 | NP_000121 | N | T | NT | possibly damaging |
| rs6019 | NP_000121 | D | H | DH | benign            |
| rs6020 | NP_000121 | R | K | RK | benign            |
| rs6025 | NP_000121 | R | Q | RQ | benign            |

|        |           |   |   |    |                   |
|--------|-----------|---|---|----|-------------------|
| rs6026 | NP_000121 | M | I | MI | benign            |
| rs6027 | NP_000121 | D | G | DG | benign            |
| rs6030 | NP_000121 | V | M | VM | benign            |
| rs6031 | NP_000121 | P | S | PS | possibly damaging |
| rs6033 | NP_000121 | M | T | MT | benign            |
| rs6045 | NP_062562 | V | D | VD | possibly damaging |
| rs6045 | NP_000122 | V | D | VD | possibly damaging |
| rs6046 | NP_062562 | R | Q | RQ | benign            |
| rs6046 | NP_000122 | R | Q | RQ | benign            |
| rs6048 | NP_000124 | T | A | TA | possibly damaging |
| rs6050 | NP_068657 | T | A | TA | benign            |
| rs6050 | NP_000499 | T | A | TA | benign            |
| rs6052 | NP_068657 | K | E | KE | benign            |
| rs6052 | NP_000499 | K | E | KE | benign            |
| rs6054 | NP_005132 | P | L | PL | probably damaging |
| rs6061 | NP_068656 | M | V | MV | probably damaging |
| rs6061 | NP_000500 | M | V | MV | probably damaging |
| rs6063 | NP_068656 | G | R | GR | probably damaging |
| rs6063 | NP_000500 | G | R | GR | probably damaging |
| rs6065 | NP_000164 | T | M | TM | benign            |
| rs6068 | NP_000164 | R | H | RH | benign            |
| rs6072 | NP_005542 | V | L | VL | benign            |
| rs6078 | NP_000227 | V | M | VM | benign            |
| rs6079 | NP_000227 | S | N | SN | benign            |
| rs6083 | NP_000227 | N | S | NS | benign            |
| rs6087 | NP_005364 | A | V | AV | benign            |
| rs6088 | NP_005364 | E | K | EK | benign            |
| rs6090 | NP_000593 | V | I | VI | benign            |
| rs6092 | NP_000593 | A | T | AT | benign            |
| rs6098 | NP_002566 | N | D | ND | benign            |
| rs6100 | NP_002566 | R | H | RH | benign            |
| rs6103 | NP_002566 | N | K | NK | benign            |
| rs6104 | NP_002566 | S | C | SC | possibly damaging |
| rs6114 | NP_000615 | G | R | GR | possibly damaging |
| rs6115 | NP_000615 | N | S | NS | benign            |
| rs6118 | NP_000615 | A | V | AV | benign            |
| rs6119 | NP_000615 | K | E | KE | benign            |
| rs6120 | NP_000615 | P | A | PA | probably damaging |
| rs6122 | NP_000304 | T | M | TM | possibly damaging |
| rs6124 | NP_002996 | P | L | PL | probably damaging |
| rs6127 | NP_002996 | N | D | ND | benign            |
| rs6130 | NP_002996 | S | F | SF | benign            |
| rs6131 | NP_002996 | S | N | SN | benign            |
| rs6133 | NP_002996 | L | V | LV | benign            |
| rs6134 | NP_002996 | M | V | MV | benign            |
| rs6136 | NP_002996 | T | P | TP | benign            |

|        |           |   |   |    |                   |
|--------|-----------|---|---|----|-------------------|
| rs6137 | NP_112246 | L | I | LI | benign            |
| rs6138 | NP_112246 | R | H | RH | possibly damaging |
| rs6140 | NP_001052 | I | T | IT | possibly damaging |
| rs6140 | NP_112246 | I | T | IT | possibly damaging |
| rs6146 | NP_003374 | E | K | EK | benign            |
| rs6149 | NP_003374 | V | I | VI | benign            |
| rs6161 | NP_000772 | E | K | EK | benign            |
| rs6165 | NP_852111 | A | T | AT | benign            |
| rs6165 | NP_000136 | A | T | AT | benign            |
| rs6166 | NP_852111 | S | N | SN | benign            |
| rs6166 | NP_000136 | S | N | SN | benign            |
| rs6167 | NP_852111 | S | R | SR | possibly damaging |
| rs6167 | NP_000136 | S | R | SR | possibly damaging |
| rs6170 | NP_000501 | S | I | SI | benign            |
| rs6174 | NP_072053 | S | C | SC | benign            |
| rs6174 | NP_072054 | S | C | SC | possibly damaging |
| rs6174 | NP_000506 | S | C | SC | probably damaging |
| rs6177 | NP_000154 | R | H | RH | possibly damaging |
| rs6180 | NP_000154 | I | L | IL | benign            |
| rs6181 | NP_000154 | R | H | RH | benign            |
| rs6182 | NP_000154 | C | F | CF | probably damaging |
| rs6183 | NP_000154 | P | T | PT | probably damaging |
| rs6184 | NP_000154 | P | T | PT | benign            |
| rs6185 | NP_000816 | S | W | SW | benign            |
| rs6190 | NP_000167 | R | K | RK | benign            |
| rs6192 | NP_000167 | F | V | FV | possibly damaging |
| rs6195 | NP_000167 | N | S | NS | benign            |
| rs6201 | NP_000853 | I | V | IV | benign            |
| rs6205 | NP_000853 | F | L | FL | benign            |
| rs6211 | NP_000189 | E | Q | EQ | benign            |
| rs6232 | NP_000430 | N | D | ND | benign            |
| rs6234 | NP_000430 | Q | E | QE | benign            |
| rs6235 | NP_000430 | S | T | ST | benign            |
| rs6258 | NP_001031 | P | L | PL | probably damaging |
| rs6259 | NP_001031 | D | N | DN | benign            |
| rs6260 | NP_001031 | R | H | RH | probably damaging |
| rs6262 | NP_000781 | P | L | PL | probably damaging |
| rs6263 | NP_000781 | M | V | MV | benign            |
| rs6264 | NP_000781 | V | M | VM | benign            |
| rs6265 | NP_733931 | V | M | VM | benign            |
| rs6265 | NP_733930 | V | M | VM | benign            |
| rs6265 | NP_733927 | V | M | VM | benign            |
| rs6266 | NP_000605 | H | R | HR | probably damaging |
| rs6267 | NP_009294 | A | S | AS | benign            |
| rs6270 | NP_000745 | C | S | CS | benign            |
| rs6271 | NP_000778 | R | C | RC | probably damaging |

|        |           |   |   |    |                   |
|--------|-----------|---|---|----|-------------------|
| rs6280 | NP_387507 | S | G | SG | benign            |
| rs6280 | NP_387508 | S | G | SG | benign            |
| rs6280 | NP_387509 | S | G | SG | benign            |
| rs6280 | NP_000787 | S | G | SG | benign            |
| rs6282 | NP_000789 | L | R | LR | possibly damaging |
| rs6291 | NP_002036 | V | I | VI | benign            |
| rs6299 | NP_000855 | S | L | SL | benign            |
| rs6303 | NP_000856 | S | F | SF | possibly damaging |
| rs6304 | NP_000612 | I | V | IV | benign            |
| rs6308 | NP_000612 | A | V | AV | benign            |
| rs6314 | NP_000612 | H | Y | HY | probably damaging |
| rs6318 | NP_000859 | C | S | CS | benign            |
| rs6330 | NP_002497 | V | A | VA | benign            |
| rs6336 | NP_002520 | H | Y | HY | possibly damaging |
| rs6339 | NP_002520 | G | V | GV | benign            |
| rs6345 | NP_001035 | R | Q | RQ | benign            |
| rs6352 | NP_001036 | K | N | KN | possibly damaging |
| rs6355 | NP_001036 | G | A | GA | benign            |
| rs6356 | NP_954987 | V | M | VM | benign            |
| rs6356 | NP_000351 | V | M | VM | benign            |
| rs6356 | NP_954986 | V | M | VM | benign            |
| rs6407 | NP_000488 | A | T | AT | benign            |
| rs6438 | NP_000489 | A | T | AT | benign            |
| rs6441 | NP_000489 | R | Q | RQ | benign            |
| rs6445 | NP_000491 | P | S | PS | probably damaging |
| rs6471 | NP_000491 | V | L | VL | benign            |
| rs6472 | NP_000491 | S | T | ST | benign            |
| rs6473 | NP_000491 | S | N | SN | benign            |
| rs6474 | NP_000491 | R | K | RK | benign            |
| rs6475 | NP_000491 | I | N | IN | benign            |
| rs6476 | NP_000491 | M | K | MK | benign            |
| rs6499 | NP_116559 | D | H | DH | possibly damaging |
| rs6499 | NP_002898 | D | H | DH | possibly damaging |
| rs6501 | NP_116559 | K | T | KT | benign            |
| rs6501 | NP_002898 | K | T | KT | benign            |
| rs6510 | NP_003105 | H | Y | HY | possibly damaging |
| rs6510 | NP_757367 | H | Y | HY | possibly damaging |
| rs6511 | NP_003105 | M | T | MT | benign            |
| rs6511 | NP_757367 | M | T | MT | benign            |
| rs6522 | NP_002177 | E | Q | EQ | benign            |
| rs6522 | NP_789743 | E | Q | EQ | benign            |
| rs6525 | NP_861525 | H | R | HR | possibly damaging |
| rs6529 | NP_066963 | A | T | AT | benign            |
| rs6561 | NP_056441 | L | S | LS | benign            |
| rs6561 | NP_599026 | L | S | LS | possibly damaging |
| rs6574 | NP_005782 | E | K | EK | benign            |

|        |           |   |   |    |                   |
|--------|-----------|---|---|----|-------------------|
| rs6577 | NP_000837 | E | A | EA | benign            |
| rs6643 | NP_057578 | Y | H | YH | possibly damaging |
| rs6647 | NP_000286 | V | A | VA | benign            |
| rs6682 | NP_076436 | A | V | AV | benign            |
| rs6753 | NP_006383 | M | T | MT | benign            |
| rs6791 | NP_008880 | V | I | VI | benign            |
| rs6794 | NP_055819 | L | V | LV | benign            |
| rs6834 | NP_005539 | T | S | TS | benign            |
| rs6887 | XP_496289 | C | S | CS | benign            |
| rs6901 | NP_055704 | Q | R | QR | benign            |
| rs6940 | NP_005522 | T | S | TS | benign            |
| rs6952 | XP_058961 | S | A | SA | benign            |
| rs6962 | NP_004159 | I | V | IV | benign            |
| rs6971 | NP_000705 | A | T | AT | benign            |
| rs6972 | NP_000705 | H | R | HR | benign            |
| rs7006 | NP_056263 | L | S | LS | benign            |
| rs7007 | NP_113608 | E | G | EG | possibly damaging |
| rs7011 | NP_116019 | R | H | RH | benign            |
| rs7041 | NP_000574 | D | E | DE | benign            |
| rs7050 | NP_663620 | T | I | TI | possibly damaging |
| rs7052 | NP_663620 | R | K | RK | benign            |
| rs7056 | NP_115534 | K | R | KR | benign            |
| rs7056 | NP_683738 | K | R | KR | benign            |
| rs7127 | NP_057712 | T | S | TS | benign            |
| rs7127 | NP_567822 | T | S | TS | benign            |
| rs7127 | NP_567823 | T | S | TS | benign            |
| rs7163 | NP_006815 | R | H | RH | benign            |
| rs7166 | NP_996667 | A | D | AD | benign            |
| rs7166 | NP_006108 | A | D | AD | benign            |
| rs7185 | NP_005678 | I | V | IV | benign            |
| rs7192 | NP_061984 | V | L | VL | benign            |
| rs7251 | NP_001562 | S | T | ST | benign            |
| rs7313 | NP_061902 | V | A | VA | benign            |
| rs7313 | NP_112601 | V | A | VA | benign            |
| rs7412 | NP_000032 | R | C | RC | benign            |
| rs7437 | NP_542159 | A | S | AS | benign            |
| rs7437 | NP_057169 | A | S | AS | benign            |
| rs7462 | NP_060386 | P | L | PL | benign            |
| rs7483 | NP_000840 | V | I | VI | benign            |
| rs7539 | NP_620829 | E | Q | EQ | benign            |
| rs7539 | NP_620832 | E | Q | EQ | benign            |
| rs7539 | NP_620830 | E | Q | EQ | benign            |
| rs7540 | NP_115682 | R | Q | RQ | benign            |
| rs7575 | NP_003767 | R | H | RH | possibly damaging |
| rs7640 | NP_060551 | A | G | AG | benign            |
| rs7648 | NP_076974 | A | P | AP | benign            |

|        |           |   |   |    |                   |
|--------|-----------|---|---|----|-------------------|
| rs7775 | NP_001454 | R | G | RG | probably damaging |
| rs7790 | NP_001125 | A | G | AG | benign            |
| rs7799 | NP_758961 | N | S | NS | benign            |
| rs7813 | NP_056536 | R | C | RC | possibly damaging |
| rs7824 | NP_001302 | A | V | AV | possibly damaging |
| rs7887 | NP_079532 | N | T | NT | benign            |
| rs7887 | NP_006700 | N | T | NT | benign            |
| rs7895 | XP_371182 | T | A | TA | benign            |
| rs7946 | NP_680478 | V | M | VM | benign            |
| rs7990 | NP_002113 | A | D | AD | benign            |
| rs7990 | NP_064440 | A | D | AD | benign            |
| rs7999 | NP_055190 | K | R | KR | benign            |
| rs8002 | NP_982283 | T | I | TI | possibly damaging |
| rs8099 | NP_057105 | G | V | GV | probably damaging |
| rs8131 | NP_061924 | L | F | LF | benign            |
| rs8144 | NP_060095 | R | P | RP | probably damaging |
| rs8147 | NP_057390 | I | V | IV | benign            |
| rs8207 | NP_004783 | N | D | ND | benign            |
| rs8237 | NP_006422 | V | F | VF | possibly damaging |
| rs8286 | NP_000656 | V | E | VE | probably damaging |
| rs8286 | NP_056646 | V | E | VE | probably damaging |
| rs8289 | NP_005808 | I | V | IV | benign            |
| rs8296 | NP_777280 | T | A | TA | possibly damaging |
| rs8305 | NP_009126 | T | A | TA | benign            |
| rs8337 | NP_006389 | S | C | SC | benign            |
| rs8340 | NP_861522 | Y | D | YD | benign            |
| rs8350 | NP_000286 | C | W | CW | probably damaging |
| rs8363 | NP_055398 | R | W | RW | probably damaging |
| rs8392 | XP_059776 | H | R | HR | benign            |
| rs8418 | NP_056195 | V | I | VI | benign            |
| rs8451 | NP_060618 | R | S | RS | benign            |
| rs8455 | NP_064554 | R | H | RH | possibly damaging |
| rs8473 | NP_002408 | K | E | KE | benign            |
| rs8480 | NP_113608 | E | A | EA | benign            |
| rs8500 | NP_872286 | V | M | VM | benign            |
| rs8500 | NP_872282 | V | M | VM | benign            |
| rs8572 | NP_005006 | V | A | VA | benign            |
| rs8634 | NP_056525 | D | A | DA | probably damaging |
| rs8660 | NP_653182 | I | V | IV | benign            |
| rs8755 | NP_203698 | R | G | RG | benign            |
| rs8755 | NP_001777 | R | G | RG | possibly damaging |
| rs8801 | NP_005547 | G | C | GC | probably damaging |
| rs8821 | NP_002009 | R | H | RH | benign            |
| rs8875 | NP_004540 | L | V | LV | benign            |
| rs8923 | NP_006432 | T | A | TA | benign            |
| rs8940 | NP_001224 | Q | E | QE | possibly damaging |

|        |           |   |   |    |                   |
|--------|-----------|---|---|----|-------------------|
| rs8957 | NP_064446 | E | D | ED | benign            |
| rs8971 | NP_000810 | D | G | DG | possibly damaging |
| rs8986 | NP_536351 | R | L | RL | probably damaging |
| rs8986 | NP_000507 | R | L | RL | probably damaging |
| rs9001 | NP_060867 | E | A | EA | possibly damaging |
| rs9002 | XP_291111 | V | M | VM | benign            |
| rs9013 | NP_003928 | K | E | KE | benign            |
| rs9014 | NP_005756 | P | A | PA | benign            |
| rs9016 | NP_000574 | H | R | HR | benign            |
| rs9057 | NP_057198 | T | I | TI | benign            |
| rs9073 | NP_620311 | V | M | VM | benign            |
| rs9073 | NP_055391 | V | M | VM | benign            |
| rs9073 | NP_620310 | V | M | VM | benign            |
| rs9087 | NP_060199 | G | D | GD | possibly damaging |
| rs9087 | NP_573441 | G | D | GD | possibly damaging |
| rs9087 | NP_631943 | G | D | GD | possibly damaging |
| rs9088 | NP_060957 | T | A | TA | benign            |
| rs9114 | NP_009140 | L | P | LP | possibly damaging |
| rs9133 | NP_001297 | A | S | AS | benign            |
| rs9169 | NP_001488 | H | R | HR | benign            |
| rs9191 | NP_115867 | D | H | DH | possibly damaging |
| rs9197 | NP_004719 | A | S | AS | benign            |
| rs9202 | NP_060904 | N | K | NK | benign            |
| rs9209 | NP_066399 | S | T | ST | benign            |
| rs9209 | NP_066400 | S | T | ST | benign            |
| rs9209 | NP_000539 | S | T | ST | benign            |
| rs9250 | NP_056386 | C | Y | CY | possibly damaging |
| rs9257 | NP_056330 | T | A | TA | benign            |
| rs9257 | NP_775320 | T | A | TA | benign            |
| rs9260 | NP_064440 | M | V | MV | benign            |
| rs9262 | XP_495929 | V | L | VL | benign            |
| rs9280 | NP_073598 | V | A | VA | benign            |
| rs9346 | NP_057554 | V | G | VG | possibly damaging |
| rs9350 | NP_003677 | P | L | PL | probably damaging |
| rs9350 | NP_569082 | P | L | PL | probably damaging |
| rs9352 | NP_005474 | V | A | VA | benign            |
| rs9354 | NP_006058 | A | V | AV | benign            |
| rs9357 | NP_056018 | S | G | SG | benign            |
| rs9365 | NP_783313 | G | C | GC | benign            |
| rs9438 | NP_065916 | C | S | CS | benign            |
| rs9439 | NP_958505 | N | H | NH | benign            |
| rs9464 | NP_060805 | P | S | PS | possibly damaging |
| rs9470 | NP_150644 | A | V | AV | benign            |
| rs9470 | NP_000964 | A | V | AV | benign            |
| rs9517 | NP_037539 | Q | E | QE | benign            |
| rs9517 | NP_037538 | Q | E | QE | possibly damaging |



|         |           |   |   |    |                   |
|---------|-----------|---|---|----|-------------------|
| rs9517  | NP_001921 | Q | E | QE | probably damaging |
| rs9526  | NP_057581 | M | I | MI | probably damaging |
| rs9530  | NP_000172 | P | L | PL | probably damaging |
| rs9575  | NP_061327 | D | N | DN | benign            |
| rs9575  | NP_872289 | D | N | DN | benign            |
| rs9575  | NP_057227 | D | N | DN | benign            |
| rs9593  | NP_443077 | M | K | MK | possibly damaging |
| rs9600  | NP_004542 | P | Q | PQ | possibly damaging |
| rs9604  | NP_065159 | R | S | RS | benign            |
| rs9614  | NP_036300 | K | T | KT | benign            |
| rs9621  | NP_004354 | G | R | GR | possibly damaging |
| rs9624  | NP_776245 | L | R | LR | probably damaging |
| rs9632  | NP_000929 | E | K | EK | possibly damaging |
| rs9744  | XP_209704 | R | T | RT | probably damaging |
| rs9748  | NP_002775 | R | H | RH | benign            |
| rs9754  | NP_065159 | F | S | FS | benign            |
| rs9790  | NP_079069 | R | W | RW | probably damaging |
| rs9809  | NP_002606 | V | I | VI | benign            |
| rs9820  | NP_003810 | Y | F | YF | benign            |
| rs9854  | NP_958861 | S | F | SF | probably damaging |
| rs9855  | NP_116197 | S | F | SF | benign            |
| rs9865  | NP_950245 | I | V | IV | benign            |
| rs9869  | XP_043500 | L | P | LP | possibly damaging |
| rs9882  | NP_061894 | A | V | AV | benign            |
| rs9898  | NP_000403 | P | S | PS | benign            |
| rs9969  | NP_078965 | R | Q | RQ | benign            |
| rs9971  | NP_877495 | D | Y | DY | possibly damaging |
| rs9971  | NP_068779 | D | Y | DY | possibly damaging |
| rs9989  | NP_002219 | T | M | TM | probably damaging |
| rs10004 | NP_003135 | S | L | SL | benign            |
| rs10012 | NP_000095 | R | G | RG | benign            |
| rs10017 | NP_659494 | G | R | GR | benign            |
| rs10067 | NP_002548 | H | Q | HQ | probably damaging |
| rs10093 | NP_064440 | E | Q | EQ | benign            |
| rs10172 | NP_690876 | T | A | TA | benign            |
| rs10240 | XP_053074 | A | D | AD | benign            |
| rs10242 | NP_006405 | I | T | IT | benign            |
| rs10242 | NP_892117 | I | T | IT | benign            |
| rs10243 | NP_060111 | G | D | GD | possibly damaging |
| rs10265 | NP_932068 | A | S | AS | benign            |
| rs10278 | NP_005822 | P | A | PA | possibly damaging |
| rs10317 | NP_006346 | G | R | GR | possibly damaging |
| rs10330 | NP_955476 | T | I | TI | benign            |
| rs10330 | NP_009194 | T | I | TI | possibly damaging |
| rs10342 | NP_003916 | A | T | AT | benign            |
| rs10371 | NP_570123 | A | T | AT | benign            |

|         |           |   |   |    |                   |
|---------|-----------|---|---|----|-------------------|
| rs10379 | NP_660206 | A | E | AE | benign            |
| rs10380 | NP_076915 | H | Y | HY | benign            |
| rs10380 | NP_002445 | H | Y | HY | benign            |
| rs10444 | NP_775269 | S | P | SP | benign            |
| rs10455 | NP_079119 | N | S | NS | benign            |
| rs10480 | NP_114107 | R | C | RC | benign            |
| rs10502 | NP_057105 | L | V | LV | benign            |
| rs10563 | NP_001013 | K | R | KR | benign            |
| rs10583 | NP_006396 | R | H | RH | benign            |
| rs10642 | NP_056988 | S | G | SG | benign            |
| rs10676 | NP_078981 | G | R | GR | benign            |
| rs10716 | NP_115595 | P | S | PS | possibly damaging |
| rs10755 | NP_982297 | F | L | FL | benign            |
| rs10755 | NP_064514 | F | L | FL | benign            |
| rs10767 | NP_071401 | V | D | VD | possibly damaging |
| rs10770 | NP_000403 | I | T | IT | benign            |
| rs10776 | NP_116056 | A | T | AT | benign            |
| rs10788 | NP_036271 | G | E | GE | possibly damaging |
| rs10794 | XP_371204 | D | N | DN | benign            |
| rs10806 | NP_065190 | R | L | RL | possibly damaging |
| rs10820 | NP_057049 | Q | K | QK | benign            |
| rs10846 | NP_002732 | V | I | VI | benign            |
| rs10846 | NP_998725 | V | I | VI | benign            |
| rs10869 | NP_036583 | T | A | TA | benign            |
| rs10885 | NP_004629 | P | S | PS | probably damaging |
| rs10885 | NP_542417 | P | S | PS | probably damaging |
| rs10920 | NP_057717 | M | K | MK | benign            |
| rs10921 | NP_000499 | S | R | SR | benign            |
| rs10921 | NP_068657 | S | R | SR | possibly damaging |
| rs10949 | NP_060370 | I | T | IT | benign            |
| rs10953 | XP_291763 | V | A | VA | benign            |
| rs10960 | NP_000287 | I | V | IV | benign            |
| rs10963 | NP_113679 | D | N | DN | benign            |
| rs10988 | NP_064502 | K | R | KR | benign            |
| rs11079 | NP_065758 | M | V | MV | benign            |
| rs11097 | NP_006327 | L | I | LI | benign            |
| rs11106 | NP_002408 | T | S | TS | benign            |
| rs11119 | XP_496612 | C | F | CF | possibly damaging |
| rs11127 | NP_006424 | T | I | TI | benign            |
| rs11146 | NP_112241 | Y | H | YH | probably damaging |
| rs11154 | NP_002083 | P | S | PS | possibly damaging |
| rs11159 | NP_003721 | R | W | RW | benign            |
| rs11177 | NP_055181 | R | Q | RQ | benign            |
| rs11177 | NP_996562 | R | Q | RQ | benign            |
| rs11250 | NP_001803 | F | L | FL | benign            |
| rs11268 | NP_000794 | A | D | AD | possibly damaging |

|         |           |   |   |    |                   |
|---------|-----------|---|---|----|-------------------|
| rs11276 | NP_066549 | N | D | ND | benign            |
| rs11278 | NP_116221 | E | Q | EQ | benign            |
| rs11307 | NP_002083 | P | A | PA | possibly damaging |
| rs11349 | NP_006585 | I | F | IF | benign            |
| rs11357 | NP_002444 | I | V | IV | benign            |
| rs11377 | NP_002572 | Q | H | QH | benign            |
| rs11380 | NP_057581 | L | F | LF | benign            |
| rs11385 | NP_874368 | D | E | DE | benign            |
| rs11385 | NP_874369 | D | E | DE | benign            |
| rs11385 | NP_006379 | D | E | DE | benign            |
| rs11435 | NP_689763 | V | I | VI | benign            |
| rs11474 | NP_995317 | F | Y | FY | benign            |
| rs11479 | NP_001944 | S | L | SL | benign            |
| rs11499 | NP_005078 | A | V | AV | benign            |
| rs11502 | NP_892017 | A | V | AV | benign            |
| rs11507 | NP_006312 | E | K | EK | benign            |
| rs11531 | NP_006286 | P | S | PS | possibly damaging |
| rs11551 | NP_001987 | R | L | RL | benign            |
| rs11562 | NP_067060 | R | S | RS | benign            |
| rs11564 | NP_076977 | R | Q | RQ | benign            |
| rs11570 | NP_056291 | D | Y | DY | benign            |
| rs11574 | NP_002158 | A | T | AT | benign            |
| rs11591 | NP_076424 | A | T | AT | benign            |
| rs11613 | NP_056448 | A | P | AP | benign            |
| rs11640 | NP_057230 | D | A | DA | possibly damaging |
| rs11687 | NP_078908 | E | Q | EQ | benign            |
| rs11706 | NP_852130 | S | L | SL | possibly damaging |
| rs11731 | XP_166529 | S | L | SL | benign            |
| rs11735 | NP_112578 | T | K | TK | possibly damaging |
| rs11746 | NP_116127 | R | Q | RQ | benign            |
| rs11754 | NP_659421 | Q | H | QH | possibly damaging |
| rs11759 | NP_000204 | D | Y | DY | probably damaging |
| rs11792 | NP_054908 | E | D | ED | benign            |
| rs11792 | NP_001110 | E | D | ED | benign            |
| rs11813 | NP_776251 | F | L | FL | benign            |
| rs11820 | NP_892115 | A | S | AS | benign            |
| rs11952 | NP_775744 | F | L | FL | benign            |
| rs11955 | NP_114107 | A | D | AD | benign            |
| rs11957 | NP_065203 | L | F | LF | benign            |
| rs11965 | NP_001307 | Q | E | QE | benign            |
| rs11974 | NP_055439 | H | R | HR | possibly damaging |
| rs11981 | XP_371107 | L | P | LP | benign            |
| rs11987 | NP_835225 | V | A | VA | benign            |
| rs11989 | NP_057153 | Q | K | QK | benign            |
| rs12000 | XP_167149 | Y | C | YC | probably damaging |
| rs12003 | NP_057657 | D | N | DN | benign            |

|         |           |   |   |    |                   |
|---------|-----------|---|---|----|-------------------|
| rs12042 | NP_000109 | T | R | TR | possibly damaging |
| rs12043 | NP_002788 | L | M | LM | benign            |
| rs12046 | XP_371107 | S | I | SI | possibly damaging |
| rs12075 | NP_002027 | G | D | GD | possibly damaging |
| rs12077 | NP_000286 | G | W | GW | probably damaging |
| rs12083 | NP_060725 | Y | C | YC | probably damaging |
| rs12109 | NP_037394 | V | L | VL | benign            |
| rs12110 | NP_659003 | R | H | RH | possibly damaging |
| rs12118 | NP_536355 | A | E | AE | benign            |
| rs12125 | NP_114140 | V | L | VL | benign            |
| rs12157 | NP_060618 | E | D | ED | benign            |
| rs12175 | XP_377713 | P | S | PS | possibly damaging |
| rs12233 | NP_000286 | P | S | PS | benign            |
| rs12249 | NP_542172 | H | R | HR | probably damaging |
| rs12257 | NP_079437 | D | N | DN | benign            |
| rs12281 | NP_976221 | W | L | WL | probably damaging |
| rs12338 | NP_680090 | L | V | LV | possibly damaging |
| rs12338 | NP_680091 | L | V | LV | possibly damaging |
| rs12338 | NP_680092 | L | V | LV | possibly damaging |
| rs12338 | NP_680093 | L | V | LV | possibly damaging |
| rs12338 | NP_001899 | L | V | LV | possibly damaging |
| rs12339 | NP_004171 | L | F | LF | benign            |
| rs12377 | XP_372083 | R | S | RS | benign            |
| rs12388 | NP_002216 | Y | H | YH | probably damaging |
| rs12402 | NP_054901 | F | L | FL | possibly damaging |
| rs12408 | NP_079305 | G | W | GW | possibly damaging |
| rs12454 | NP_057710 | G | C | GC | benign            |
| rs12459 | NP_570720 | S | T | ST | possibly damaging |
| rs12482 | NP_004517 | I | S | IS | probably damaging |
| rs12497 | NP_071942 | R | W | RW | probably damaging |
| rs12499 | NP_060947 | T | S | TS | benign            |
| rs12505 | NP_001814 | L | F | LF | benign            |
| rs12529 | NP_003730 | H | Q | HQ | benign            |
| rs12544 | NP_000033 | E | G | EG | possibly damaging |
| rs12571 | NP_005868 | G | D | GD | possibly damaging |
| rs12572 | NP_689677 | V | I | VI | benign            |
| rs12577 | NP_061879 | E | D | ED | benign            |
| rs12582 | NP_060880 | S | F | SF | benign            |
| rs12648 | NP_060838 | D | E | DE | benign            |
| rs12676 | NP_060867 | R | L | RL | benign            |
| rs12689 | XP_377716 | N | S | NS | benign            |
| rs12709 | NP_004062 | E | G | EG | benign            |
| rs12759 | NP_004801 | L | F | LF | benign            |
| rs12763 | NP_059973 | G | S | GS | benign            |
| rs12788 | NP_689499 | R | H | RH | possibly damaging |
| rs12807 | NP_003324 | L | R | LR | benign            |

|         |           |   |   |    |                   |
|---------|-----------|---|---|----|-------------------|
| rs12812 | NP_066957 | T | A | TA | benign            |
| rs12820 | NP_000983 | V | D | VD | benign            |
| rs12824 | NP_001634 | T | A | TA | possibly damaging |
| rs12834 | NP_115866 | F | L | FL | benign            |
| rs12864 | NP_036234 | Q | H | QH | benign            |
| rs12865 | NP_056194 | T | A | TA | benign            |
| rs12890 | NP_061879 | E | K | EK | possibly damaging |
| rs12893 | XP_291064 | E | K | EK | benign            |
| rs12917 | NP_002403 | L | F | LF | benign            |
| rs12949 | NP_002279 | S | T | ST | benign            |
| rs12960 | NP_003110 | R | Q | RQ | benign            |
| rs12993 | NP_000603 | K | N | KN | benign            |
| rs13018 | NP_004137 | S | N | SN | benign            |
| rs13021 | NP_002678 | S | G | SG | benign            |
| rs13043 | NP_060617 | L | S | LS | benign            |
| rs13087 | NP_076988 | D | E | DE | benign            |
| rs13088 | NP_659421 | F | S | FS | benign            |
| rs13097 | NP_787114 | C | Y | CY | probably damaging |
| rs13151 | NP_775918 | E | D | ED | benign            |
| rs13181 | NP_000391 | K | Q | KQ | benign            |
| rs13206 | NP_006387 | S | Y | SY | possibly damaging |
| rs13237 | NP_060917 | M | T | MT | probably damaging |
| rs13268 | NP_006477 | H | R | HR | benign            |
| rs13294 | NP_004416 | S | G | SG | benign            |
| rs13294 | NP_073155 | S | G | SG | benign            |
| rs13303 | NP_055951 | T | M | TM | benign            |
| rs13321 | NP_002151 | Q | E | QE | benign            |
| rs13330 | NP_056480 | K | M | KM | benign            |
| rs13394 | NP_060386 | V | I | VI | benign            |
| rs13412 | NP_006446 | Q | R | QR | benign            |
| rs13427 | NP_036346 | N | D | ND | benign            |
| rs13428 | NP_006428 | R | G | RG | benign            |
| rs13441 | NP_005103 | I | V | IV | benign            |
| rs13441 | NP_059830 | I | V | IV | benign            |
| rs13462 | XP_114317 | V | F | VF | possibly damaging |
| rs13502 | NP_000982 | R | L | RL | possibly damaging |
| rs13508 | NP_005821 | N | D | ND | benign            |
| rs13538 | NP_003951 | S | F | SF | probably damaging |
| rs13560 | NP_114367 | R | C | RC | probably damaging |
| rs13560 | NP_114368 | R | C | RC | probably damaging |
| rs13560 | NP_002810 | R | C | RC | probably damaging |
| rs13571 | NP_057575 | C | S | CS | benign            |
| rs13574 | NP_006825 | E | D | ED | benign            |
| rs13579 | NP_001004 | R | S | RS | benign            |
| rs13587 | NP_054901 | K | N | KN | possibly damaging |
| rs13617 | NP_000891 | Q | R | QR | possibly damaging |

|         |           |   |   |    |                   |
|---------|-----------|---|---|----|-------------------|
| rs13622 | NP_112557 | S | F | SF | benign            |
| rs13622 | NP_003709 | S | F | SF | benign            |
| rs13660 | NP_620125 | G | R | GR | possibly damaging |
| rs13660 | NP_997193 | G | R | GR | possibly damaging |
| rs13663 | NP_001061 | M | V | MV | benign            |
| rs13669 | NP_004134 | Q | H | QH | possibly damaging |
| rs13706 | NP_001245 | V | I | VI | benign            |
| rs13721 | NP_003991 | R | W | RW | probably damaging |
| rs13747 | XP_208356 | L | P | LP | probably damaging |
| rs13767 | NP_006618 | D | N | DN | benign            |
| rs13768 | NP_733822 | R | L | RL | benign            |
| rs13768 | NP_733821 | R | L | RL | benign            |
| rs13783 | NP_115866 | K | Q | KQ | benign            |
| rs13787 | NP_789842 | K | N | KN | benign            |
| rs13787 | NP_789845 | K | N | KN | benign            |
| rs13787 | NP_008834 | K | N | KN | benign            |
| rs13787 | NP_789843 | K | N | KN | benign            |
| rs13805 | NP_002083 | A | T | AT | benign            |
| rs13807 | NP_001988 | T | I | TI | benign            |
| rs13815 | NP_775738 | G | A | GA | possibly damaging |
| rs13817 | NP_079404 | H | R | HR | benign            |
| rs13846 | NP_060388 | Y | F | YF | benign            |
| rs13856 | NP_006187 | D | E | DE | benign            |
| rs13874 | NP_775742 | T | M | TM | benign            |
| rs13883 | NP_003734 | S | Y | SY | possibly damaging |
| rs13883 | NP_671756 | S | Y | SY | possibly damaging |
| rs13883 | NP_671766 | S | Y | SY | possibly damaging |
| rs13894 | NP_597998 | R | C | RC | possibly damaging |
| rs13898 | NP_001120 | V | I | VI | benign            |
| rs13899 | NP_115503 | T | N | TN | benign            |
| rs13926 | NP_057376 | G | R | GR | benign            |
| rs13928 | NP_001120 | K | E | KE | benign            |
| rs13955 | NP_078895 | L | P | LP | probably damaging |
| rs13962 | NP_002027 | A | T | AT | benign            |
| rs13963 | NP_003269 | S | G | SG | benign            |
| rs13965 | NP_068757 | M | I | MI | probably damaging |
| rs13991 | NP_006532 | Q | H | QH | benign            |
| rs14005 | NP_001627 | Q | R | QR | benign            |
| rs14008 | NP_002344 | E | D | ED | benign            |
| rs14009 | NP_000983 | P | Q | PQ | benign            |
| rs14026 | NP_689598 | V | A | VA | benign            |
| rs14079 | NP_001302 | C | F | CF | probably damaging |
| rs14092 | NP_002427 | E | Q | EQ | benign            |
| rs14115 | NP_037519 | I | V | IV | benign            |
| rs14120 | NP_061884 | K | M | KM | benign            |
| rs14120 | NP_996994 | K | M | KM | benign            |

|         |           |   |   |    |                   |
|---------|-----------|---|---|----|-------------------|
| rs14120 | NP_996999 | K | M | KM | possibly damaging |
| rs14159 | NP_006819 | L | S | LS | benign            |
| rs14222 | NP_006401 | A | P | AP | benign            |
| rs14227 | NP_003951 | L | V | LV | benign            |
| rs14251 | NP_776189 | I | L | IL | benign            |
| rs14296 | NP_004143 | H | Y | HY | probably damaging |
| rs14329 | NP_955400 | I | T | IT | benign            |
| rs14329 | NP_056453 | I | T | IT | benign            |
| rs14367 | NP_000603 | K | N | KN | possibly damaging |
| rs14378 | NP_115637 | S | N | SN | benign            |
| rs14421 | NP_075567 | A | V | AV | benign            |
| rs14422 | NP_079437 | A | T | AT | benign            |
| rs14429 | NP_660144 | L | Q | LQ | possibly damaging |
| rs14429 | NP_660145 | L | Q | LQ | possibly damaging |
| rs14429 | NP_002748 | L | Q | LQ | possibly damaging |
| rs14429 | NP_660143 | L | Q | LQ | possibly damaging |
| rs14452 | NP_599026 | R | S | RS | benign            |
| rs14452 | NP_599027 | R | S | RS | benign            |
| rs14452 | NP_056441 | R | S | RS | benign            |
| rs14547 | NP_003098 | A | S | AS | benign            |
| rs14628 | NP_036458 | V | L | VL | benign            |
| rs14635 | NP_982353 | R | L | RL | possibly damaging |
| rs14635 | NP_058637 | R | L | RL | possibly damaging |
| rs14659 | NP_005478 | L | P | LP | possibly damaging |
| rs14665 | NP_005604 | A | S | AS | benign            |
| rs14670 | NP_056189 | G | W | GW | possibly damaging |
| rs14704 | NP_001719 | K | N | KN | benign            |
| rs14704 | NP_940991 | K | N | KN | possibly damaging |
| rs14714 | NP_003323 | Y | H | YH | possibly damaging |
| rs14714 | NP_937758 | Y | H | YH | possibly damaging |
| rs14777 | NP_005908 | L | P | LP | probably damaging |
| rs14812 | NP_055135 | E | A | EA | benign            |
| rs14835 | NP_857591 | K | E | KE | benign            |
| rs14835 | NP_857592 | K | E | KE | benign            |
| rs14835 | NP_057410 | K | E | KE | benign            |
| rs14835 | NP_058647 | K | E | KE | benign            |
| rs14872 | NP_291028 | L | M | LM | benign            |
| rs14926 | NP_005608 | K | E | KE | benign            |
| rs14930 | NP_006254 | T | K | TK | benign            |
| rs14969 | NP_689896 | T | K | TK | benign            |
| rs14999 | NP_005118 | G | C | GC | probably damaging |
| rs15001 | NP_061973 | G | A | GA | benign            |
| rs15013 | NP_006414 | V | E | VE | benign            |
| rs15015 | NP_877577 | V | F | VF | possibly damaging |
| rs15033 | NP_005987 | A | V | AV | benign            |
| rs15033 | NP_057653 | A | V | AV | benign            |

|         |           |   |   |    |                   |
|---------|-----------|---|---|----|-------------------|
| rs15063 | NP_116071 | H | Y | HY | possibly damaging |
| rs15085 | NP_115936 | E | K | EK | benign            |
| rs15094 | NP_001350 | K | N | KN | possibly damaging |
| rs15097 | NP_078899 | N | S | NS | benign            |
| rs15140 | NP_002291 | T | I | TI | benign            |
| rs15146 | XP_371107 | Q | R | QR | possibly damaging |
| rs15148 | XP_375375 | T | I | TI | possibly damaging |
| rs15166 | NP_005818 | K | N | KN | benign            |
| rs15184 | XP_497558 | F | I | FI | benign            |
| rs15188 | NP_002468 | K | R | KR | benign            |
| rs15208 | NP_037541 | S | P | SP | benign            |
| rs15233 | NP_005824 | M | I | MI | possibly damaging |
| rs15251 | NP_000347 | A | V | AV | benign            |
| rs15252 | NP_000347 | K | E | KE | benign            |
| rs15253 | NP_000347 | T | K | TK | benign            |
| rs15303 | NP_001975 | G | D | GD | benign            |
| rs15341 | NP_060707 | K | R | KR | benign            |
| rs15389 | NP_006388 | A | G | AG | benign            |
| rs15396 | NP_857594 | K | N | KN | benign            |
| rs15448 | NP_006417 | P | T | PT | benign            |
| rs15495 | NP_060937 | E | D | ED | benign            |
| rs15511 | XP_048070 | S | Y | SY | possibly damaging |
| rs15566 | NP_005580 | E | G | EG | possibly damaging |
| rs15594 | NP_004724 | Q | H | QH | possibly damaging |
| rs15611 | NP_056295 | R | L | RL | possibly damaging |
| rs15633 | NP_002255 | E | Q | EQ | possibly damaging |
| rs15648 | NP_057212 | M | T | MT | probably damaging |
| rs15660 | NP_002255 | P | T | PT | probably damaging |
| rs15700 | NP_937868 | R | K | RK | benign            |
| rs15702 | NP_056286 | V | M | VM | benign            |
| rs15769 | NP_004069 | C | F | CF | probably damaging |
| rs15772 | NP_006405 | A | G | AG | benign            |
| rs15772 | NP_892117 | A | G | AG | benign            |
| rs15783 | NP_663625 | T | I | TI | benign            |
| rs15809 | NP_000177 | Q | E | QE | benign            |
| rs15809 | NP_002104 | Q | E | QE | benign            |
| rs15873 | NP_085140 | L | P | LP | possibly damaging |
| rs15896 | NP_079413 | V | F | VF | benign            |
| rs15911 | NP_004379 | V | I | VI | benign            |
| rs15917 | XP_294473 | P | L | PL | probably damaging |
| rs15922 | NP_005634 | T | R | TR | benign            |
| rs15934 | NP_116784 | F | S | FS | possibly damaging |
| rs15938 | NP_001004 | G | C | GC | probably damaging |
| rs15943 | XP_372199 | Q | E | QE | benign            |
| rs15960 | NP_001892 | H | Y | HY | benign            |
| rs15967 | NP_071888 | P | T | PT | possibly damaging |



|         |           |   |   |    |                   |
|---------|-----------|---|---|----|-------------------|
| rs15999 | NP_000059 | A | V | AV | benign            |
| rs16019 | NP_000059 | E | A | EA | benign            |
| rs16020 | NP_000059 | P | S | PS | benign            |
| rs16022 | NP_000059 | E | D | ED | benign            |
| rs16023 | NP_000059 | E | V | EV | possibly damaging |
| rs16024 | NP_000059 | E | K | EK | benign            |
| rs16028 | NP_000059 | P | L | PL | probably damaging |
| rs16139 | NP_000896 | L | P | LP | possibly damaging |
| rs16522 | XP_372668 | Q | R | QR | benign            |
| rs16941 | NP_009230 | E | G | EG | benign            |
| rs16941 | NP_009231 | E | G | EG | benign            |
| rs16941 | NP_009232 | E | G | EG | benign            |
| rs16941 | NP_009233 | E | G | EG | benign            |
| rs16941 | NP_009228 | E | G | EG | benign            |
| rs16942 | NP_009230 | K | R | KR | benign            |
| rs16942 | NP_009231 | K | R | KR | benign            |
| rs16942 | NP_009232 | K | R | KR | benign            |
| rs16942 | NP_009233 | K | R | KR | benign            |
| rs16942 | NP_009228 | K | R | KR | benign            |
| rs17456 | NP_001995 | I | V | IV | benign            |
| rs17467 | NP_954657 | L | V | LV | benign            |
| rs17467 | NP_000215 | L | V | LV | benign            |
| rs17560 | NP_001136 | K | E | KE | benign            |
| rs17561 | NP_000566 | A | S | AS | benign            |
| rs17562 | NP_000566 | N | D | ND | possibly damaging |
| rs17563 | NP_570911 | A | V | AV | benign            |
| rs17563 | NP_570912 | A | V | AV | benign            |
| rs17563 | NP_001193 | A | V | AV | benign            |
| rs17567 | NP_001972 | I | M | IM | benign            |
| rs17571 | NP_001900 | A | V | AV | benign            |
| rs17573 | NP_680090 | S | N | SN | benign            |
| rs17573 | NP_680091 | S | N | SN | benign            |
| rs17573 | NP_680092 | S | N | SN | benign            |
| rs17573 | NP_680093 | S | N | SN | benign            |
| rs17573 | NP_001899 | S | N | SN | benign            |
| rs17580 | NP_000286 | E | V | EV | probably damaging |
| rs17585 | NP_002930 | P | Q | PQ | possibly damaging |
| rs17585 | NP_976318 | P | Q | PQ | possibly damaging |
| rs17585 | NP_976322 | P | Q | PQ | possibly damaging |
| rs17585 | NP_976323 | P | Q | PQ | possibly damaging |
| rs17585 | NP_976321 | P | Q | PQ | possibly damaging |
| rs17585 | NP_976320 | P | Q | PQ | possibly damaging |
| rs17585 | NP_976317 | P | Q | PQ | possibly damaging |
| rs17585 | NP_976319 | P | Q | PQ | possibly damaging |
| rs17592 | NP_077320 | A | G | AG | benign            |
| rs17592 | NP_775110 | A | G | AG | benign            |

|         |           |   |   |    |                   |
|---------|-----------|---|---|----|-------------------|
| rs17592 | NP_997629 | A | G | AG | benign            |
| rs17592 | NP_997630 | A | G | AG | benign            |
| rs17592 | NP_000061 | A | G | AG | benign            |
| rs17607 | NP_001242 | A | T | AT | benign            |
| rs17608 | NP_001819 | A | V | AV | benign            |
| rs17610 | NP_001726 | S | N | SN | benign            |
| rs17611 | NP_001726 | V | I | VI | benign            |
| rs17613 | NP_000597 | H | N | HN | probably damaging |
| rs17615 | NP_001868 | S | N | SN | benign            |
| rs17621 | NP_003640 | H | Y | HY | benign            |
| rs17621 | NP_004023 | H | Y | HY | possibly damaging |
| rs17622 | NP_003640 | Q | E | QE | benign            |
| rs17622 | NP_004023 | Q | E | QE | benign            |
| rs17623 | NP_003640 | L | R | LR | possibly damaging |
| rs17623 | NP_004023 | L | R | LR | possibly damaging |
| rs17624 | NP_000099 | L | V | LV | benign            |
| rs17655 | NP_000114 | H | D | HD | benign            |
| rs20319 | NP_004645 | P | S | PS | possibly damaging |
| rs20320 | NP_004645 | T | A | TA | benign            |
| rs20361 | NP_009293 | F | L | FL | benign            |
| rs20361 | NP_006720 | F | L | FL | benign            |
| rs20541 | NP_002179 | Q | R | QR | benign            |
| rs20551 | NP_001420 | I | V | IV | benign            |
| rs20559 | NP_002284 | R | Q | RQ | benign            |
| rs20571 | NP_005172 | V | I | VI | benign            |
| rs25414 | NP_000037 | S | N | SN | benign            |
| rs25414 | NP_942002 | S | N | SN | benign            |
| rs25474 | NP_006288 | P | L | PL | probably damaging |
| rs25487 | NP_006288 | R | Q | RQ | benign            |
| rs25489 | NP_006288 | R | H | RH | possibly damaging |
| rs25490 | NP_006288 | T | A | TA | benign            |
| rs25491 | NP_006288 | P | S | PS | benign            |
| rs25496 | NP_006288 | V | A | VA | possibly damaging |
| rs25640 | NP_000405 | R | H | RH | possibly damaging |
| rs25644 | NP_002551 | S | G | SG | benign            |
| rs25647 | NP_002078 | G | A | GA | possibly damaging |
| rs25653 | NP_001141 | Q | R | QR | benign            |
| rs25655 | NP_001739 | E | D | ED | benign            |
| rs25680 | NP_001233 | A | T | AT | benign            |
| rs25683 | NP_005882 | K | R | KR | benign            |
| rs25688 | NP_037522 | R | K | RK | benign            |
| rs25689 | NP_037522 | R | H | RH | possibly damaging |
| rs25692 | NP_037522 | P | S | PS | possibly damaging |
| rs25695 | NP_037522 | D | E | DE | benign            |
| rs25789 | XP_496746 | R | H | RH | benign            |
| rs25882 | NP_000749 | I | T | IT | benign            |

|         |           |   |   |    |                   |
|---------|-----------|---|---|----|-------------------|
| rs25901 | NP_036466 | T | S | TS | benign            |
| rs26618 | NP_057526 | I | M | IM | benign            |
| rs26653 | NP_057526 | P | R | PR | possibly damaging |
| rs26722 | NP_057264 | K | E | KE | benign            |
| rs26740 | NP_036466 | R | Q | RQ | benign            |
| rs26764 | XP_370946 | S | T | ST | benign            |
| rs26839 | NP_004415 | H | R | HR | benign            |
| rs26856 | NP_872369 | G | S | GS | benign            |
| rs26857 | NP_872369 | I | V | IV | benign            |
| rs27027 | XP_209728 | E | Q | EQ | benign            |
| rs27044 | NP_057526 | E | Q | EQ | benign            |
| rs27742 | NP_803564 | E | K | EK | benign            |
| rs27742 | NP_001045 | E | K | EK | benign            |
| rs27895 | NP_057526 | G | D | GD | benign            |
| rs28265 | NP_115580 | D | H | DH | possibly damaging |
| rs28963 | NP_776246 | H | R | HR | probably damaging |
| rs29281 | NP_002015 | A | S | AS | benign            |
| rs29372 | NP_066187 | N | S | NS | possibly damaging |
| rs29910 | XP_376412 | A | T | AT | benign            |
| rs29911 | XP_376412 | M | I | MI | benign            |
| rs30168 | NP_001360 | A | V | AV | benign            |
| rs30187 | NP_057526 | R | K | RK | benign            |
| rs30386 | NP_942568 | K | T | KT | benign            |
| rs30386 | NP_055858 | K | T | KT | benign            |
| rs30461 | NP_742152 | N | D | ND | benign            |
| rs30489 | NP_963964 | G | R | GR | possibly damaging |
| rs30832 | NP_000103 | T | I | TI | possibly damaging |
| rs30842 | NP_002071 | G | V | GV | benign            |
| rs31208 | NP_570969 | T | M | TM | benign            |
| rs31244 | XP_043493 | D | N | DN | benign            |
| rs31517 | NP_002293 | V | I | VI | benign            |
| rs31655 | NP_061337 | A | T | AT | benign            |
| rs31655 | NP_061338 | A | T | AT | benign            |
| rs31655 | NP_000434 | A | T | AT | benign            |
| rs31726 | NP_073746 | K | R | KR | benign            |
| rs31728 | NP_073746 | A | P | AP | benign            |
| rs31738 | NP_037472 | I | T | IT | benign            |
| rs31849 | NP_061760 | K | R | KR | benign            |
| rs31853 | NP_061759 | V | I | VI | benign            |
| rs32854 | NP_079262 | A | D | AD | benign            |
| rs32857 | XP_293976 | L | S | LS | possibly damaging |
| rs33204 | NP_060738 | V | I | VI | benign            |
| rs33391 | NP_000167 | N | K | NK | possibly damaging |
| rs33555 | NP_689837 | L | F | LF | benign            |
| rs34677 | NP_055139 | Q | H | QH | possibly damaging |
| rs34899 | NP_055714 | D | N | DN | benign            |

|          |           |   |   |    |                   |
|----------|-----------|---|---|----|-------------------|
| rs34966  | NP_065847 | H | Y | HY | possibly damaging |
| rs35195  | NP_387513 | T | M | TM | benign            |
| rs35195  | NP_001788 | T | M | TM | possibly damaging |
| rs35213  | NP_001788 | S | A | SA | benign            |
| rs35213  | NP_387513 | S | A | SA | benign            |
| rs36259  | NP_078828 | A | T | AT | benign            |
| rs36571  | NP_115580 | P | S | PS | benign            |
| rs36657  | NP_653287 | Q | E | QE | benign            |
| rs36686  | NP_055071 | H | R | HR | benign            |
| rs37369  | NP_114106 | V | I | VI | benign            |
| rs37370  | NP_114106 | S | N | SN | benign            |
| rs37458  | NP_777623 | A | T | AT | benign            |
| rs37458  | NP_777628 | A | T | AT | benign            |
| rs37458  | NP_777631 | A | T | AT | benign            |
| rs38794  | XP_377955 | L | M | LM | benign            |
| rs40401  | NP_000579 | P | S | PS | benign            |
| rs40470  | NP_787069 | L | F | LF | benign            |
| rs40497  | NP_714917 | K | E | KE | benign            |
| rs40986  | NP_036291 | P | L | PL | benign            |
| rs41245  | NP_001288 | E | Q | EQ | benign            |
| rs41469  | NP_062545 | R | H | RH | benign            |
| rs41551  | NP_997219 | Q | H | QH | benign            |
| rs41552  | NP_997219 | G | V | GV | probably damaging |
| rs42138  | NP_954651 | G | S | GS | possibly damaging |
| rs42139  | NP_954651 | M | I | MI | benign            |
| rs42663  | NP_149098 | W | C | WC | probably damaging |
| rs42664  | NP_149098 | N | S | NS | benign            |
| rs42766  | NP_036466 | G | V | GV | probably damaging |
| rs42942  | NP_055118 | T | S | TS | benign            |
| rs44058  | XP_293923 | S | C | SC | benign            |
| rs85276  | NP_009135 | I | T | IT | benign            |
| rs86312  | NP_000254 | G | R | GR | possibly damaging |
| rs90951  | NP_878910 | C | R | CR | benign            |
| rs90951  | NP_006335 | R | C | RC | benign            |
| rs96489  | XP_372347 | Q | R | QR | benign            |
| rs100803 | NP_945322 | A | V | AV | benign            |
| rs100803 | NP_056332 | A | V | AV | benign            |
| rs103612 | NP_005076 | P | S | PS | benign            |
| rs106287 | NP_008860 | V | M | VM | benign            |
| rs121966 | NP_942150 | W | R | WR | benign            |
| rs122213 | XP_497306 | T | A | TA | benign            |
| rs123509 | NP_689606 | C | R | CR | probably damaging |
| rs125555 | NP_056723 | P | A | PA | benign            |
| rs125555 | NP_056669 | P | A | PA | benign            |
| rs125555 | NP_002375 | P | A | PA | benign            |
| rs125555 | NP_056671 | P | A | PA | possibly damaging |

|          |           |   |   |    |                   |
|----------|-----------|---|---|----|-------------------|
| rs129415 | NP_766638 | R | G | RG | benign            |
| rs130015 | NP_004371 | V | I | VI | benign            |
| rs130060 | NP_000854 | F | C | FC | benign            |
| rs130061 | NP_000854 | F | L | FL | benign            |
| rs130063 | NP_000854 | I | V | IV | benign            |
| rs130064 | NP_000854 | E | K | EK | possibly damaging |
| rs130065 | NP_061925 | R | G | RG | possibly damaging |
| rs130066 | NP_061925 | S | R | SR | benign            |
| rs130067 | NP_061925 | E | D | ED | benign            |
| rs130069 | NP_061925 | Q | R | QR | benign            |
| rs130072 | NP_061925 | R | Q | RQ | benign            |
| rs130074 | NP_061925 | Q | H | QH | possibly damaging |
| rs130075 | NP_061925 | R | Q | RQ | benign            |
| rs130076 | NP_061925 | R | W | RW | possibly damaging |
| rs130079 | NP_061925 | G | C | GC | probably damaging |
| rs131779 | NP_612442 | H | R | HR | possibly damaging |
| rs132760 | NP_663612 | I | V | IV | benign            |
| rs133072 | NP_005288 | D | N | DN | benign            |
| rs133335 | NP_689826 | G | D | GD | possibly damaging |
| rs133885 | NP_115997 | G | E | GE | possibly damaging |
| rs135311 | NP_598397 | R | P | RP | possibly damaging |
| rs136175 | NP_003652 | M | I | MI | benign            |
| rs136175 | NP_663318 | M | I | MI | benign            |
| rs136175 | NP_663319 | M | I | MI | benign            |
| rs136176 | NP_003652 | R | K | RK | benign            |
| rs136176 | NP_663318 | R | K | RK | benign            |
| rs136176 | NP_663319 | R | K | RK | benign            |
| rs136467 | NP_006596 | I | V | IV | benign            |
| rs136468 | NP_006596 | C | R | CR | probably damaging |
| rs136470 | NP_006596 | G | S | GS | benign            |
| rs136472 | NP_006596 | S | T | ST | benign            |
| rs136478 | NP_006596 | Y | C | YC | possibly damaging |
| rs136603 | NP_683515 | F | V | FV | benign            |
| rs136730 | NP_001987 | R | Q | RQ | benign            |
| rs136730 | NP_006476 | R | Q | RQ | possibly damaging |
| rs136730 | NP_006477 | R | Q | RQ | possibly damaging |
| rs136730 | NP_006478 | R | Q | RQ | possibly damaging |
| rs136853 | NP_066919 | I | V | IV | benign            |
| rs137055 | NP_055324 | C | R | CR | probably damaging |
| rs137064 | NP_733799 | Q | R | QR | benign            |
| rs137203 | NP_066938 | W | L | WL | probably damaging |
| rs137731 | NP_073622 | T | A | TA | benign            |
| rs137731 | NP_942153 | T | A | TA | benign            |
| rs137794 | NP_073622 | H | Y | HY | benign            |
| rs137794 | NP_942153 | H | Y | HY | benign            |
| rs138708 | NP_056189 | R | C | RC | possibly damaging |

|          |           |   |   |    |                   |
|----------|-----------|---|---|----|-------------------|
| rs138951 | NP_055955 | R | W | RW | possibly damaging |
| rs138993 | NP_766638 | P | S | PS | probably damaging |
| rs139297 | NP_861438 | G | R | GR | possibly damaging |
| rs139298 | NP_861438 | K | E | KE | benign            |
| rs139299 | NP_861438 | K | N | KN | benign            |
| rs139300 | NP_861438 | E | K | EK | benign            |
| rs139302 | NP_861438 | E | D | ED | benign            |
| rs140054 | NP_057510 | R | W | RW | possibly damaging |
| rs140195 | NP_000845 | E | K | EK | benign            |
| rs140431 | NP_997357 | R | G | RG | possibly damaging |
| rs140504 | NP_067585 | S | N | SN | benign            |
| rs140504 | NP_004318 | S | N | SN | benign            |
| rs140627 | NP_000129 | C | F | CF | probably damaging |
| rs140638 | NP_000129 | N | S | NS | possibly damaging |
| rs140693 | NP_003916 | E | K | EK | benign            |
| rs144848 | NP_000050 | H | N | HN | benign            |
| rs149836 | NP_004247 | G | A | GA | benign            |
| rs150122 | NP_055498 | M | V | MV | possibly damaging |
| rs150481 | NP_037447 | Y | S | YS | benign            |
| rs150481 | NP_954869 | Y | S | YS | benign            |
| rs150481 | NP_954870 | Y | S | YS | benign            |
| rs150482 | NP_037447 | L | P | LP | benign            |
| rs150482 | NP_954869 | L | P | LP | benign            |
| rs150482 | NP_954870 | L | P | LP | benign            |
| rs150857 | NP_037408 | K | E | KE | benign            |
| rs150989 | NP_003544 | T | A | TA | benign            |
| rs151611 | NP_005099 | D | E | DE | benign            |
| rs152451 | NP_078951 | Q | R | QR | benign            |
| rs153477 | NP_000396 | I | V | IV | benign            |
| rs153478 | NP_000396 | M | V | MV | benign            |
| rs155733 | NP_006169 | T | M | TM | benign            |
| rs156265 | NP_001598 | E | D | ED | benign            |
| rs156631 | NP_003697 | S | P | SP | probably damaging |
| rs156697 | NP_899062 | N | D | ND | benign            |
| rs156853 | XP_057040 | Q | H | QH | benign            |
| rs156855 | XP_057040 | T | A | TA | benign            |
| rs157024 | XP_028522 | I | M | IM | benign            |
| rs157496 | NP_835260 | T | A | TA | benign            |
| rs158551 | NP_003648 | V | A | VA | benign            |
| rs160076 | XP_293923 | L | V | LV | benign            |
| rs160277 | NP_004376 | D | Y | DY | benign            |
| rs160278 | NP_004376 | F | Y | FY | benign            |
| rs160632 | NP_060813 | R | G | RG | probably damaging |
| rs160838 | XP_290867 | A | V | AV | benign            |
| rs161400 | NP_004928 | I | T | IT | benign            |
| rs161704 | NP_620586 | S | N | SN | benign            |

|          |           |   |   |    |                   |
|----------|-----------|---|---|----|-------------------|
| rs161931 | NP_689685 | E | K | EK | benign            |
| rs162036 | NP_076915 | K | R | KR | benign            |
| rs162036 | NP_002445 | K | R | KR | benign            |
| rs162832 | NP_060730 | P | L | PL | probably damaging |
| rs164075 | NP_057664 | H | N | HN | benign            |
| rs164181 | NP_872387 | V | A | VA | benign            |
| rs164365 | NP_666018 | I | M | IM | benign            |
| rs164515 | NP_057664 | S | N | SN | benign            |
| rs165815 | NP_001661 | R | Q | RQ | benign            |
| rs165867 | NP_000176 | H | P | HP | probably damaging |
| rs165907 | XP_496496 | A | T | AT | benign            |
| rs165907 | XP_496500 | A | T | AT | benign            |
| rs166452 | NP_005874 | T | S | TS | benign            |
| rs166453 | NP_005874 | A | V | AV | benign            |
| rs167037 | NP_000073 | S | C | SC | possibly damaging |
| rs167437 | NP_071940 | G | S | GS | benign            |
| rs167447 | NP_000690 | H | L | HL | probably damaging |
| rs167479 | XP_290867 | P | H | PH | probably damaging |
| rs168107 | NP_055942 | S | R | SR | benign            |
| rs168192 | NP_061720 | P | T | PT | probably damaging |
| rs169068 | NP_001044 | P | L | PL | possibly damaging |
| rs169548 | NP_000050 | S | P | SP | benign            |
| rs169758 | NP_037447 | G | E | GE | possibly damaging |
| rs169758 | NP_954869 | G | E | GE | possibly damaging |
| rs169758 | NP_954870 | G | E | GE | possibly damaging |
| rs170462 | XP_294590 | R | K | RK | benign            |
| rs170646 | XP_498015 | G | E | GE | benign            |
| rs170758 | NP_061977 | A | V | AV | benign            |
| rs171114 | NP_000907 | A | G | AG | benign            |
| rs171170 | NP_000675 | R | L | RL | possibly damaging |
| rs172298 | NP_006188 | N | D | ND | benign            |
| rs173042 | NP_689836 | T | P | TP | benign            |
| rs174264 | NP_689741 | L | P | LP | probably damaging |
| rs174477 | NP_037533 | Q | R | QR | benign            |
| rs175080 | NP_055196 | P | L | PL | benign            |
| rs175081 | NP_055196 | D | N | DN | benign            |
| rs175218 | NP_003678 | V | I | VI | benign            |
| rs176250 | NP_005095 | L | F | LF | benign            |
| rs177386 | XP_370765 | G | R | GR | benign            |
| rs177484 | XP_377934 | F | V | FV | benign            |
| rs178412 | NP_002305 | F | Y | FY | possibly damaging |
| rs178614 | XP_375869 | D | Y | DY | benign            |
| rs178614 | XP_496391 | Y | D | YD | benign            |
| rs179008 | NP_057646 | Q | L | QL | possibly damaging |
| rs179472 | NP_001711 | S | T | ST | benign            |
| rs179472 | NP_861525 | S | T | ST | benign            |

|          |           |   |   |    |                   |
|----------|-----------|---|---|----|-------------------|
| rs179489 | NP_861463 | G | R | GR | possibly damaging |
| rs179489 | NP_000209 | G | R | GR | possibly damaging |
| rs179489 | NP_861462 | R | G | RG | possibly damaging |
| rs180749 | NP_114106 | T | I | TI | benign            |
| rs180897 | NP_000675 | A | T | AT | benign            |
| rs181206 | NP_663634 | L | P | LP | benign            |
| rs181984 | XP_066058 | G | R | GR | possibly damaging |
| rs182844 | XP_371770 | S | G | SG | benign            |
| rs183360 | NP_057394 | A | S | AS | benign            |
| rs183490 | XP_371770 | N | S | NS | benign            |
| rs183854 | NP_036559 | D | N | DN | probably damaging |
| rs184437 | XP_294590 | N | S | NS | benign            |
| rs184457 | NP_982258 | S | P | SP | possibly damaging |
| rs184496 | XP_094074 | D | N | DN | benign            |
| rs185153 | NP_705831 | P | L | PL | probably damaging |
| rs185435 | XP_291142 | M | V | MV | benign            |
| rs185819 | NP_061978 | H | R | HR | possibly damaging |
| rs187033 | XP_372563 | Q | E | QE | benign            |
| rs187033 | XP_372565 | Q | E | QE | benign            |
| rs187316 | NP_065829 | L | P | LP | possibly damaging |
| rs188096 | NP_000443 | A | S | AS | benign            |
| rs188242 | NP_031390 | F | S | FS | probably damaging |
| rs188387 | NP_066387 | Q | H | QH | probably damaging |
| rs188703 | NP_004376 | R | H | RH | benign            |
| rs189429 | NP_000675 | E | D | ED | benign            |
| rs190325 | NP_115582 | L | V | LV | benign            |
| rs190631 | NP_463459 | Q | H | QH | probably damaging |
| rs190631 | NP_055090 | Q | H | QH | probably damaging |
| rs190645 | NP_067013 | S | F | SF | benign            |
| rs192026 | NP_076937 | S | T | ST | benign            |
| rs192200 | XP_375376 | E | K | EK | benign            |
| rs193192 | NP_945327 | H | P | HP | probably damaging |
| rs194134 | NP_588612 | P | S | PS | possibly damaging |
| rs194524 | NP_694544 | Q | R | QR | benign            |
| rs194525 | NP_694544 | I | M | IM | benign            |
| rs194685 | NP_004794 | T | I | TI | benign            |
| rs194998 | NP_817089 | V | L | VL | benign            |
| rs196380 | NP_005099 | Y | N | YN | benign            |
| rs196586 | NP_085139 | N | S | NS | benign            |
| rs196594 | NP_085139 | P | S | PS | benign            |
| rs196864 | NP_005373 | T | P | TP | benign            |
| rs197367 | NP_061155 | R | K | RK | benign            |
| rs197412 | NP_009135 | I | T | IT | benign            |
| rs197414 | NP_009135 | R | S | RS | benign            |
| rs197922 | NP_473363 | R | K | RK | benign            |
| rs197922 | NP_004278 | R | K | RK | benign            |



|          |           |   |   |    |                   |
|----------|-----------|---|---|----|-------------------|
| rs198400 | NP_068503 | G | E | GE | benign            |
| rs198400 | NP_068504 | G | E | GE | benign            |
| rs198400 | NP_068505 | G | E | GE | benign            |
| rs198400 | NP_001277 | G | E | GE | possibly damaging |
| rs198977 | NP_005542 | R | W | RW | possibly damaging |
| rs199396 | NP_002459 | R | C | RC | probably damaging |
| rs199603 | NP_061866 | A | T | AT | benign            |
| rs200454 | NP_060668 | T | S | TS | benign            |
| rs200658 | NP_055256 | S | N | SN | benign            |
| rs200916 | NP_066383 | A | G | AG | benign            |
| rs200917 | NP_066383 | D | G | DG | benign            |
| rs202084 | NP_115492 | A | S | AS | benign            |
| rs202210 | NP_031363 | R | G | RG | possibly damaging |
| rs202210 | NP_005097 | R | G | RG | possibly damaging |
| rs202444 | NP_065757 | N | T | NT | benign            |
| rs202676 | NP_004467 | Y | H | YH | possibly damaging |
| rs203462 | NP_009133 | I | V | IV | benign            |
| rs203710 | NP_006496 | M | I | MI | benign            |
| rs203870 | XP_498061 | I | N | IN | benign            |
| rs204710 | XP_037759 | D | G | DG | possibly damaging |
| rs204718 | XP_037759 | V | M | VM | possibly damaging |
| rs204781 | NP_005527 | I | V | IV | benign            |
| rs204896 | NP_061978 | R | H | RH | possibly damaging |
| rs204900 | NP_061978 | S | A | SA | benign            |
| rs205498 | NP_005073 | L | P | LP | benign            |
| rs208294 | NP_002553 | Y | H | YH | benign            |
| rs208696 | NP_056093 | Q | R | QR | benign            |
| rs208753 | NP_006188 | M | V | MV | possibly damaging |
| rs209569 | XP_372031 | H | R | HR | benign            |
| rs209720 | NP_055685 | M | V | MV | possibly damaging |
| rs209729 | NP_055685 | C | Y | CY | probably damaging |
| rs210280 | NP_008886 | R | C | RC | probably damaging |
| rs210585 | NP_066386 | K | R | KR | benign            |
| rs210586 | NP_066386 | I | V | IV | benign            |
| rs210968 | NP_002935 | N | K | NK | possibly damaging |
| rs212146 | NP_037447 | E | K | EK | benign            |
| rs212146 | NP_954869 | E | K | EK | benign            |
| rs212146 | NP_954870 | E | K | EK | benign            |
| rs212989 | XP_117174 | V | M | VM | benign            |
| rs212991 | XP_117174 | I | M | IM | benign            |
| rs213227 | NP_077819 | H | Q | HQ | possibly damaging |
| rs213246 | XP_375075 | S | F | SF | benign            |
| rs213544 | XP_087225 | A | D | AD | possibly damaging |
| rs213950 | NP_000483 | M | V | MV | benign            |
| rs216195 | NP_060045 | K | Q | KQ | benign            |
| rs216321 | NP_000543 | R | Q | RQ | benign            |

|          |           |   |   |    |                   |
|----------|-----------|---|---|----|-------------------|
| rs216462 | XP_496202 | H | R | HR | possibly damaging |
| rs217086 | NP_001805 | T | I | TI | benign            |
| rs217180 | NP_112583 | A | T | AT | benign            |
| rs217435 | NP_037521 | E | K | EK | benign            |
| rs218966 | XP_376578 | K | R | KR | benign            |
| rs219567 | XP_497515 | V | I | VI | benign            |
| rs220159 | NP_775839 | D | N | DN | benign            |
| rs220379 | NP_005732 | C | S | CS | benign            |
| rs220461 | NP_114171 | T | I | TI | benign            |
| rs220462 | NP_114171 | D | G | DG | benign            |
| rs220479 | NP_002199 | V | I | VI | benign            |
| rs221057 | NP_694945 | E | Q | EQ | benign            |
| rs221058 | NP_694945 | G | R | GR | benign            |
| rs221214 | XP_373223 | H | R | HR | benign            |
| rs222581 | NP_005594 | T | A | TA | benign            |
| rs224331 | NP_000548 | S | A | SA | benign            |
| rs224496 | NP_037408 | E | D | ED | benign            |
| rs225014 | NP_054644 | T | A | TA | benign            |
| rs225014 | NP_000784 | T | A | TA | benign            |
| rs226405 | NP_000005 | D | N | DN | benign            |
| rs226794 | NP_008969 | P | L | PL | benign            |
| rs226891 | NP_055526 | M | I | MI | benign            |
| rs226959 | NP_899229 | H | Q | HQ | benign            |
| rs227368 | NP_005899 | V | I | VI | benign            |
| rs227584 | NP_076937 | T | P | TP | benign            |
| rs227787 | NP_036505 | E | K | EK | benign            |
| rs227789 | NP_036505 | I | T | IT | benign            |
| rs228104 | NP_061837 | I | V | IV | benign            |
| rs228406 | NP_000100 | G | D | GD | benign            |
| rs228406 | NP_003997 | G | D | GD | benign            |
| rs228406 | NP_003998 | G | D | GD | benign            |
| rs228406 | NP_004000 | G | D | GD | benign            |
| rs228406 | NP_004001 | G | D | GD | benign            |
| rs228648 | NP_068835 | T | M | TM | benign            |
| rs228696 | NP_058515 | L | P | LP | probably damaging |
| rs228697 | NP_058515 | P | A | PA | possibly damaging |
| rs228753 | NP_689557 | E | K | EK | benign            |
| rs228757 | NP_631944 | D | E | DE | benign            |
| rs228757 | NP_005465 | E | D | ED | benign            |
| rs228942 | NP_000869 | D | E | DE | benign            |
| rs229150 | NP_057190 | K | R | KR | benign            |
| rs229526 | NP_114116 | P | R | PR | benign            |
| rs229526 | NP_872292 | P | R | PR | benign            |
| rs229527 | NP_114116 | G | V | GV | benign            |
| rs229527 | NP_872292 | G | V | GV | benign            |
| rs229568 | NP_001042 | S | T | ST | benign            |

|          |           |   |   |    |                   |
|----------|-----------|---|---|----|-------------------|
| rs230321 | NP_071403 | L | R | LR | possibly damaging |
| rs230898 | NP_114104 | G | A | GA | benign            |
| rs231267 | XP_208319 | F | V | FV | benign            |
| rs231677 | XP_497524 | R | K | RK | benign            |
| rs231678 | XP_497524 | S | A | SA | benign            |
| rs231696 | NP_003695 | R | C | RC | possibly damaging |
| rs231775 | NP_005205 | T | A | TA | benign            |
| rs232518 | NP_004531 | L | P | LP | probably damaging |
| rs232729 | NP_742003 | L | P | LP | probably damaging |
| rs232777 | XP_055481 | E | K | EK | benign            |
| rs233223 | NP_005916 | S | P | SP | possibly damaging |
| rs233240 | NP_941966 | N | D | ND | benign            |
| rs233252 | NP_941969 | Y | C | YC | probably damaging |
| rs235035 | NP_004767 | D | N | DN | benign            |
| rs235330 | NP_000202 | H | Q | HQ | possibly damaging |
| rs235636 | NP_689551 | S | G | SG | benign            |
| rs235637 | NP_689551 | V | L | VL | benign            |
| rs235638 | NP_689551 | T | S | TS | benign            |
| rs235650 | NP_015556 | G | R | GR | benign            |
| rs235768 | NP_001191 | R | S | RS | probably damaging |
| rs235836 | XP_047025 | A | T | AT | benign            |
| rs235842 | NP_060353 | R | H | RH | possibly damaging |
| rs236150 | NP_001810 | K | N | KN | benign            |
| rs236151 | NP_001810 | A | T | AT | possibly damaging |
| rs236152 | NP_001810 | A | G | AG | benign            |
| rs236565 | XP_497555 | M | T | MT | probably damaging |
| rs236632 | NP_942150 | C | S | CS | probably damaging |
| rs236652 | NP_115534 | T | S | TS | benign            |
| rs236652 | NP_663620 | T | S | TS | benign            |
| rs236652 | NP_684281 | T | S | TS | benign            |
| rs236661 | XP_496895 | A | T | AT | benign            |
| rs236661 | XP_290401 | T | A | TA | benign            |
| rs236666 | XP_290401 | P | T | PT | probably damaging |
| rs236666 | XP_496895 | P | T | PT | probably damaging |
| rs236812 | NP_113644 | V | A | VA | benign            |
| rs236813 | NP_113644 | Q | E | QE | benign            |
| rs237227 | XP_497552 | H | R | HR | benign            |
| rs237422 | NP_689717 | A | V | AV | benign            |
| rs237831 | NP_060850 | A | T | AT | benign            |
| rs237901 | NP_000907 | T | M | TM | probably damaging |
| rs237903 | NP_000907 | A | V | AV | benign            |
| rs238209 | NP_066363 | T | I | TI | possibly damaging |
| rs238221 | NP_066363 | Q | H | QH | benign            |
| rs238234 | NP_055914 | A | P | AP | benign            |
| rs238238 | NP_443739 | N | S | NS | benign            |
| rs238238 | NP_001967 | N | S | NS | benign            |

|          |           |   |   |    |                   |
|----------|-----------|---|---|----|-------------------|
| rs238239 | NP_443739 | A | V | AV | benign            |
| rs238239 | NP_001967 | A | V | AV | benign            |
| rs238519 | NP_055585 | G | A | GA | possibly damaging |
| rs238520 | NP_055585 | Q | H | QH | possibly damaging |
| rs238521 | NP_055585 | G | V | GV | probably damaging |
| rs238639 | NP_851421 | S | N | SN | benign            |
| rs238639 | NP_851422 | S | N | SN | benign            |
| rs238639 | NP_055818 | S | N | SN | benign            |
| rs238639 | XP_496064 | S | N | SN | benign            |
| rs238740 | NP_000675 | D | E | DE | benign            |
| rs238741 | NP_000675 | R | S | RS | possibly damaging |
| rs239259 | XP_495880 | M | I | MI | benign            |
| rs239798 | XP_294139 | K | T | KT | benign            |
| rs239942 | XP_292765 | G | S | GS | benign            |
| rs240033 | NP_004794 | P | R | PR | probably damaging |
| rs240736 | NP_542376 | I | T | IT | benign            |
| rs240736 | NP_004361 | I | T | IT | benign            |
| rs240768 | NP_006819 | Y | C | YC | probably damaging |
| rs240780 | NP_006819 | S | C | SC | probably damaging |
| rs241419 | NP_683756 | V | I | VI | benign            |
| rs241419 | NP_002791 | V | I | VI | benign            |
| rs241447 | NP_000535 | A | T | AT | benign            |
| rs241571 | NP_000287 | T | K | TK | benign            |
| rs241572 | NP_000287 | R | P | RP | benign            |
| rs242017 | NP_116069 | A | V | AV | benign            |
| rs242018 | NP_116069 | E | K | EK | benign            |
| rs242056 | NP_061324 | G | R | GR | possibly damaging |
| rs242296 | XP_376869 | R | T | RT | probably damaging |
| rs242944 | NP_787078 | H | R | HR | probably damaging |
| rs243383 | NP_005474 | A | S | AS | benign            |
| rs243829 | NP_060309 | Q | H | QH | benign            |
| rs244903 | NP_002878 | V | I | VI | benign            |
| rs246074 | NP_061721 | L | V | LV | benign            |
| rs246074 | NP_114088 | L | V | LV | benign            |
| rs246669 | NP_061761 | T | A | TA | benign            |
| rs246679 | NP_037472 | F | L | FL | benign            |
| rs246703 | NP_061762 | H | Q | HQ | benign            |
| rs246704 | NP_061762 | L | P | LP | benign            |
| rs246707 | NP_061762 | V | A | VA | possibly damaging |
| rs247818 | XP_375376 | M | L | ML | benign            |
| rs247897 | XP_375376 | M | L | ML | possibly damaging |
| rs249038 | NP_055548 | G | S | GS | possibly damaging |
| rs250430 | NP_006042 | R | C | RC | possibly damaging |
| rs250430 | NP_573418 | R | C | RC | possibly damaging |
| rs250430 | NP_573420 | R | C | RC | possibly damaging |
| rs250430 | NP_573419 | R | C | RC | possibly damaging |

|          |           |   |   |    |                   |
|----------|-----------|---|---|----|-------------------|
| rs250563 | NP_000327 | F | L | FL | probably damaging |
| rs251353 | NP_054724 | S | R | SR | benign            |
| rs251353 | NP_114063 | S | R | SR | benign            |
| rs251354 | NP_054724 | L | V | LV | benign            |
| rs251354 | NP_114063 | L | V | LV | benign            |
| rs251355 | NP_054724 | G | R | GR | benign            |
| rs251355 | NP_114063 | G | R | GR | benign            |
| rs251362 | NP_114065 | S | R | SR | benign            |
| rs251362 | NP_114066 | S | R | SR | benign            |
| rs251362 | NP_061724 | S | R | SR | benign            |
| rs251364 | NP_114065 | V | G | VG | benign            |
| rs251364 | NP_061724 | V | G | VG | benign            |
| rs251513 | XP_377896 | R | Q | RQ | benign            |
| rs251514 | XP_377896 | S | R | SR | possibly damaging |
| rs251732 | NP_003214 | Q | H | QH | benign            |
| rs252176 | XP_372473 | V | M | VM | benign            |
| rs254460 | NP_976042 | G | S | GS | benign            |
| rs254460 | NP_976041 | G | S | GS | benign            |
| rs255051 | NP_071750 | R | P | RP | probably damaging |
| rs257878 | XP_496134 | W | R | WR | probably damaging |
| rs259028 | NP_055548 | T | I | TI | possibly damaging |
| rs259290 | NP_997274 | S | A | SA | benign            |
| rs259358 | NP_056300 | A | V | AV | benign            |
| rs262496 | XP_371496 | M | V | MV | probably damaging |
| rs262993 | NP_060493 | V | I | VI | benign            |
| rs264731 | XP_370713 | G | S | GS | benign            |
| rs265277 | NP_005874 | S | A | SA | benign            |
| rs265282 | XP_059051 | G | R | GR | possibly damaging |
| rs265771 | NP_055276 | A | S | AS | benign            |
| rs266472 | NP_005725 | V | I | VI | benign            |
| rs266788 | XP_375308 | N | I | NI | possibly damaging |
| rs266789 | XP_375308 | R | H | RH | benign            |
| rs267561 | NP_002198 | E | G | EG | benign            |
| rs267733 | NP_003559 | G | D | GD | possibly damaging |
| rs267738 | NP_859530 | E | A | EA | possibly damaging |
| rs267745 | XP_043739 | E | D | ED | benign            |
| rs267746 | XP_043739 | K | Q | KQ | benign            |
| rs268671 | NP_870998 | V | A | VA | benign            |
| rs268673 | NP_870998 | I | M | IM | benign            |
| rs268674 | NP_870998 | R | G | RG | benign            |
| rs268687 | NP_037508 | A | T | AT | benign            |
| rs269243 | XP_371960 | P | H | PH | probably damaging |
| rs269757 | XP_375308 | T | N | TN | benign            |
| rs269868 | NP_054799 | S | L | SL | benign            |
| rs270495 | NP_060238 | Q | P | QP | possibly damaging |
| rs270771 | NP_077293 | A | V | AV | benign            |

|          |           |   |   |    |                   |
|----------|-----------|---|---|----|-------------------|
| rs270790 | NP_703144 | V | I | VI | benign            |
| rs272128 | NP_997247 | P | T | PT | possibly damaging |
| rs272893 | NP_003050 | I | T | IT | benign            |
| rs273687 | NP_055256 | N | K | NK | benign            |
| rs273688 | NP_055256 | A | D | AD | benign            |
| rs273690 | NP_055256 | V | A | VA | benign            |
| rs276921 | NP_077741 | R | W | RW | probably damaging |
| rs276921 | NP_001932 | R | W | RW | probably damaging |
| rs276937 | NP_077741 | S | T | ST | benign            |
| rs276937 | NP_001932 | S | T | ST | benign            |
| rs276938 | NP_077741 | R | K | RK | benign            |
| rs276938 | NP_001932 | R | K | RK | benign            |
| rs277995 | NP_071415 | G | A | GA | probably damaging |
| rs278981 | NP_061900 | V | M | VM | benign            |
| rs279549 | NP_703190 | R | Q | RQ | benign            |
| rs279549 | NP_703191 | R | Q | RQ | benign            |
| rs279549 | NP_116121 | R | Q | RQ | benign            |
| rs279552 | NP_056328 | V | M | VM | benign            |
| rs279601 | NP_997234 | E | Q | EQ | benign            |
| rs280528 | NP_008996 | G | E | GE | benign            |
| rs282009 | XP_371267 | I | V | IV | benign            |
| rs282129 | NP_002034 | T | M | TM | possibly damaging |
| rs282414 | XP_371755 | S | P | SP | benign            |
| rs283526 | NP_036200 | P | L | PL | possibly damaging |
| rs283816 | NP_006105 | F | L | FL | possibly damaging |
| rs284246 | XP_088797 | K | R | KR | benign            |
| rs284662 | NP_940942 | S | G | SG | benign            |
| rs284797 | NP_000664 | R | H | RH | benign            |
| rs284859 | NP_060257 | A | S | AS | benign            |
| rs284860 | NP_060257 | P | S | PS | benign            |
| rs285227 | NP_775901 | H | R | HR | possibly damaging |
| rs285501 | XP_496145 | R | W | RW | possibly damaging |
| rs285584 | NP_037509 | G | S | GS | possibly damaging |
| rs288326 | NP_001454 | R | W | RW | probably damaging |
| rs288334 | NP_061854 | H | Q | HQ | benign            |
| rs289723 | NP_115582 | Q | K | QK | benign            |
| rs291102 | NP_002635 | A | V | AV | benign            |
| rs291466 | NP_932164 | M | T | MT | benign            |
| rs291466 | NP_055177 | M | T | MT | benign            |
| rs291728 | NP_443165 | K | Q | KQ | benign            |
| rs291915 | XP_496435 | K | R | KR | benign            |
| rs291915 | XP_496461 | K | R | KR | benign            |
| rs292501 | NP_060765 | L | F | LF | possibly damaging |
| rs292502 | NP_060765 | A | V | AV | benign            |
| rs292592 | NP_054868 | P | L | PL | benign            |
| rs292680 | XP_374653 | E | Q | EQ | benign            |

|          |           |   |   |    |                   |
|----------|-----------|---|---|----|-------------------|
| rs293813 | NP_777568 | M | T | MT | possibly damaging |
| rs293833 | XP_093644 | Q | R | QR | benign            |
| rs293979 | NP_663625 | S | W | SW | benign            |
| rs295330 | XP_374191 | V | G | VG | possibly damaging |
| rs295331 | XP_374191 | L | R | LR | benign            |
| rs295761 | XP_496034 | V | A | VA | benign            |
| rs296520 | NP_060735 | C | R | CR | probably damaging |
| rs297054 | XP_166877 | S | A | SA | benign            |
| rs297055 | XP_166877 | L | P | LP | possibly damaging |
| rs297081 | XP_166879 | N | D | ND | benign            |
| rs297118 | XP_372386 | C | Y | CY | possibly damaging |
| rs298109 | NP_004684 | G | R | GR | benign            |
| rs299284 | NP_036617 | R | C | RC | benign            |
| rs299284 | NP_036616 | R | C | RC | benign            |
| rs299290 | NP_036617 | V | A | VA | benign            |
| rs299290 | NP_036616 | V | A | VA | benign            |
| rs299295 | NP_036617 | A | V | AV | benign            |
| rs299295 | NP_036616 | A | V | AV | benign            |
| rs299671 | XP_375150 | R | H | RH | possibly damaging |
| rs300169 | NP_872431 | I | T | IT | possibly damaging |
| rs300175 | NP_872431 | N | S | NS | benign            |
| rs302453 | NP_604393 | Q | L | QL | possibly damaging |
| rs303819 | XP_377265 | T | P | TP | possibly damaging |
| rs303821 | XP_377265 | H | R | HR | benign            |
| rs305974 | NP_000765 | D | N | DN | benign            |
| rs306197 | NP_065829 | L | P | LP | possibly damaging |
| rs306547 | NP_073616 | I | V | IV | benign            |
| rs306548 | NP_073616 | R | Q | RQ | benign            |
| rs307377 | XP_371210 | C | R | CR | probably damaging |
| rs307658 | NP_060919 | N | S | NS | benign            |
| rs307658 | NP_065918 | N | S | NS | benign            |
| rs307692 | NP_060919 | A | V | AV | benign            |
| rs307692 | NP_065918 | A | V | AV | benign            |
| rs307761 | XP_088315 | S | N | SN | benign            |
| rs307771 | XP_088315 | K | E | KE | benign            |
| rs307772 | XP_088315 | M | T | MT | benign            |
| rs307821 | NP_891555 | R | L | RL | benign            |
| rs307826 | NP_002011 | T | A | TA | benign            |
| rs307826 | NP_891555 | T | A | TA | benign            |
| rs308925 | XP_496170 | R | H | RH | possibly damaging |
| rs309195 | XP_028253 | A | G | AG | benign            |
| rs309369 | NP_689831 | E | D | ED | benign            |
| rs309370 | NP_689831 | R | Q | RQ | benign            |
| rs309559 | NP_004376 | K | R | KR | benign            |
| rs310631 | NP_208384 | V | L | VL | benign            |
| rs310632 | NP_208384 | H | R | HR | benign            |

|          |           |   |   |    |                   |
|----------|-----------|---|---|----|-------------------|
| rs310654 | NP_543013 | V | L | VL | benign            |
| rs310655 | NP_543013 | A | T | AT | benign            |
| rs310657 | NP_543013 | V | L | VL | benign            |
| rs310680 | NP_002059 | C | Y | CY | probably damaging |
| rs310791 | NP_976328 | L | F | LF | benign            |
| rs310831 | NP_976328 | H | Q | HQ | benign            |
| rs311685 | NP_061135 | R | Q | RQ | benign            |
| rs311686 | NP_061135 | E | K | EK | benign            |
| rs312966 | XP_371480 | M | V | MV | benign            |
| rs313549 | NP_060793 | P | S | PS | benign            |
| rs314665 | NP_057541 | A | V | AV | benign            |
| rs315675 | XP_376310 | L | H | LH | possibly damaging |
| rs316019 | NP_694861 | A | S | AS | benign            |
| rs316019 | NP_003049 | A | S | AS | benign            |
| rs317139 | NP_058627 | I | M | IM | benign            |
| rs317926 | NP_787067 | D | G | DG | possibly damaging |
| rs320821 | XP_375869 | A | S | AS | benign            |
| rs320821 | XP_496391 | S | A | SA | benign            |
| rs321612 | XP_496207 | K | E | KE | benign            |
| rs321613 | XP_496207 | P | S | PS | benign            |
| rs321776 | NP_078945 | V | M | VM | benign            |
| rs321937 | NP_775801 | P | R | PR | possibly damaging |
| rs322937 | NP_659505 | R | G | RG | benign            |
| rs322965 | NP_659505 | I | V | IV | benign            |
| rs323343 | NP_112561 | R | K | RK | benign            |
| rs323344 | NP_112561 | V | L | VL | benign            |
| rs323562 | NP_115976 | I | V | IV | benign            |
| rs323844 | NP_037387 | C | G | CG | probably damaging |
| rs323870 | NP_005476 | Q | R | QR | benign            |
| rs323872 | NP_127503 | G | S | GS | benign            |
| rs323872 | NP_065151 | G | S | GS | benign            |
| rs323872 | NP_127502 | G | S | GS | benign            |
| rs324109 | NP_115799 | S | N | SN | benign            |
| rs324136 | NP_065796 | V | I | VI | benign            |
| rs324146 | NP_872345 | L | P | LP | probably damaging |
| rs324420 | NP_001432 | P | T | PT | possibly damaging |
| rs324981 | NP_997056 | N | I | NI | benign            |
| rs324981 | NP_997055 | N | I | NI | benign            |
| rs325465 | NP_997056 | S | G | SG | benign            |
| rs325465 | NP_997055 | S | G | SG | benign            |
| rs325609 | XP_062263 | T | A | TA | benign            |
| rs325706 | XP_290552 | E | V | EV | possibly damaging |
| rs325864 | NP_775760 | I | V | IV | benign            |
| rs326146 | NP_065433 | V | I | VI | benign            |
| rs326181 | XP_376372 | P | S | PS | possibly damaging |
| rs327463 | XP_496002 | H | R | HR | possibly damaging |



|          |           |   |   |    |                   |
|----------|-----------|---|---|----|-------------------|
| rs328694 | NP_877438 | P | S | PS | possibly damaging |
| rs329003 | NP_005125 | I | V | IV | benign            |
| rs329709 | NP_150630 | R | Q | RQ | benign            |
| rs329709 | NP_942596 | R | Q | RQ | benign            |
| rs329940 | NP_060770 | T | M | TM | benign            |
| rs329942 | XP_375639 | M | V | MV | probably damaging |
| rs329964 | XP_496321 | K | N | KN | benign            |
| rs329965 | XP_496321 | D | N | DN | benign            |
| rs330150 | NP_060009 | I | M | IM | benign            |
| rs330261 | NP_079117 | T | A | TA | benign            |
| rs330877 | NP_001965 | A | T | AT | benign            |
| rs330880 | NP_001965 | S | R | SR | benign            |
| rs331312 | NP_000100 | E | D | ED | benign            |
| rs331312 | NP_003997 | E | D | ED | benign            |
| rs331312 | NP_003998 | E | D | ED | benign            |
| rs331312 | NP_004000 | E | D | ED | benign            |
| rs331312 | NP_004002 | E | D | ED | benign            |
| rs331312 | NP_004003 | E | D | ED | benign            |
| rs331312 | NP_004001 | E | D | ED | benign            |
| rs331510 | XP_372347 | R | W | RW | probably damaging |
| rs331537 | XP_061676 | R | H | RH | probably damaging |
| rs333550 | NP_115821 | R | H | RH | benign            |
| rs333971 | NP_757349 | S | F | SF | benign            |
| rs333971 | NP_757350 | S | F | SF | possibly damaging |
| rs333971 | NP_757351 | S | F | SF | possibly damaging |
| rs334773 | NP_886552 | L | P | LP | possibly damaging |
| rs336552 | XP_208300 | K | R | KR | benign            |
| rs336873 | XP_498321 | I | L | IL | benign            |
| rs336874 | XP_498321 | D | N | DN | benign            |
| rs337277 | NP_775758 | V | M | VM | benign            |
| rs337382 | NP_061930 | P | S | PS | possibly damaging |
| rs337820 | XP_372941 | S | P | SP | benign            |
| rs339041 | NP_001699 | R | W | RW | probably damaging |
| rs339445 | NP_001360 | H | Q | HQ | possibly damaging |
| rs340138 | XP_290854 | Q | R | QR | benign            |
| rs340151 | XP_293599 | S | C | SC | probably damaging |
| rs340167 | NP_078892 | S | G | SG | benign            |
| rs341047 | NP_002590 | T | I | TI | benign            |
| rs343320 | NP_066928 | H | Y | HY | probably damaging |
| rs343376 | XP_378181 | V | A | VA | benign            |
| rs344140 | NP_065910 | A | G | AG | benign            |
| rs344141 | NP_065910 | A | P | AP | possibly damaging |
| rs344560 | NP_742011 | E | K | EK | benign            |
| rs344560 | NP_003798 | K | E | KE | benign            |
| rs345512 | NP_065926 | I | L | IL | benign            |
| rs345512 | NP_996672 | I | L | IL | benign            |

|          |           |   |   |    |                   |
|----------|-----------|---|---|----|-------------------|
| rs345513 | NP_065926 | D | G | DG | possibly damaging |
| rs345513 | NP_996672 | D | G | DG | possibly damaging |
| rs346821 | NP_060456 | V | A | VA | benign            |
| rs346822 | NP_060456 | R | Q | RQ | benign            |
| rs347877 | NP_851421 | V | I | VI | benign            |
| rs347877 | NP_851422 | V | I | VI | benign            |
| rs347877 | NP_055818 | V | I | VI | benign            |
| rs347877 | XP_496064 | V | I | VI | benign            |
| rs347879 | NP_851421 | R | Q | RQ | benign            |
| rs347879 | NP_851422 | R | Q | RQ | benign            |
| rs347879 | NP_055818 | R | Q | RQ | benign            |
| rs347879 | XP_496064 | R | Q | RQ | benign            |
| rs347880 | NP_851421 | K | N | KN | benign            |
| rs347880 | NP_851422 | K | N | KN | benign            |
| rs347880 | NP_055818 | K | N | KN | benign            |
| rs347880 | XP_496064 | K | N | KN | benign            |
| rs349053 | NP_872379 | S | N | SN | benign            |
| rs349660 | XP_372563 | Q | E | QE | benign            |
| rs349660 | XP_372565 | Q | E | QE | benign            |
| rs350132 | NP_115940 | H | L | HL | probably damaging |
| rs351111 | NP_002768 | I | V | IV | benign            |
| rs351260 | NP_055588 | T | A | TA | benign            |
| rs351371 | NP_004176 | V | M | VM | benign            |
| rs351371 | NP_078613 | V | M | VM | benign            |
| rs351733 | NP_776191 | D | E | DE | benign            |
| rs351855 | NP_998812 | G | R | GR | possibly damaging |
| rs351993 | NP_079164 | P | S | PS | possibly damaging |
| rs351994 | NP_079164 | T | A | TA | benign            |
| rs352493 | NP_057623 | S | N | SN | benign            |
| rs353163 | NP_872412 | R | Q | RQ | benign            |
| rs353693 | XP_114000 | S | A | SA | benign            |
| rs354478 | NP_079199 | V | M | VM | benign            |
| rs354479 | NP_079199 | L | S | LS | benign            |
| rs356356 | XP_497056 | D | G | DG | possibly damaging |
| rs356357 | XP_497056 | D | G | DG | possibly damaging |
| rs357373 | XP_374655 | R | K | RK | benign            |
| rs357564 | NP_000255 | L | P | LP | benign            |
| rs358733 | NP_775928 | S | N | SN | benign            |
| rs360057 | NP_066277 | D | A | DA | benign            |
| rs361499 | NP_002299 | E | G | EG | possibly damaging |
| rs361499 | NP_033665 | E | G | EG | probably damaging |
| rs361566 | NP_699165 | P | S | PS | possibly damaging |
| rs361566 | NP_878315 | P | S | PS | possibly damaging |
| rs361580 | NP_542778 | Y | S | YS | benign            |
| rs361666 | NP_542778 | R | S | RS | benign            |
| rs361762 | NP_542778 | F | L | FL | benign            |

|          |           |   |   |    |                   |
|----------|-----------|---|---|----|-------------------|
| rs361863 | XP_376008 | S | G | SG | benign            |
| rs361959 | NP_542778 | K | N | KN | benign            |
| rs362003 | NP_542778 | N | D | ND | benign            |
| rs362011 | NP_542778 | N | S | NS | benign            |
| rs362090 | XP_376008 | P | S | PS | benign            |
| rs362124 | NP_542778 | G | A | GA | benign            |
| rs362132 | NP_542778 | N | S | NS | benign            |
| rs362691 | NP_005036 | L | V | LV | benign            |
| rs362691 | NP_774959 | L | V | LV | benign            |
| rs362800 | NP_005036 | L | V | LV | benign            |
| rs362800 | NP_774959 | L | V | LV | benign            |
| rs362936 | NP_000829 | G | E | GE | benign            |
| rs363193 | NP_775887 | L | I | LI | benign            |
| rs363212 | NP_003896 | S | F | SF | possibly damaging |
| rs363294 | NP_776152 | R | Q | RQ | benign            |
| rs363295 | NP_776152 | H | Q | HQ | possibly damaging |
| rs363315 | NP_862823 | S | P | SP | benign            |
| rs363359 | NP_862823 | A | G | AG | benign            |
| rs363360 | NP_862823 | A | V | AV | benign            |
| rs363494 | NP_000821 | I | V | IV | benign            |
| rs363494 | NP_783300 | I | V | IV | benign            |
| rs363503 | NP_000821 | A | V | AV | benign            |
| rs363504 | NP_000821 | L | S | LS | benign            |
| rs363747 | NP_079197 | I | V | IV | benign            |
| rs363748 | NP_079197 | Q | H | QH | benign            |
| rs363751 | NP_079197 | E | A | EA | benign            |
| rs363766 | NP_079197 | P | S | PS | benign            |
| rs363774 | NP_079197 | M | L | ML | benign            |
| rs363775 | NP_079197 | M | V | MV | benign            |
| rs363802 | NP_000129 | V | I | VI | benign            |
| rs363810 | NP_000129 | C | S | CS | probably damaging |
| rs363811 | NP_000129 | G | R | GR | probably damaging |
| rs363831 | NP_000129 | D | E | DE | benign            |
| rs363835 | NP_000129 | P | S | PS | probably damaging |
| rs363850 | NP_000129 | H | Q | HQ | probably damaging |
| rs363852 | NP_000129 | C | R | CR | probably damaging |
| rs363853 | NP_000129 | C | R | CR | probably damaging |
| rs363926 | NP_061876 | T | A | TA | benign            |
| rs364101 | NP_054724 | K | R | KR | benign            |
| rs364101 | NP_114063 | K | R | KR | benign            |
| rs364111 | NP_443116 | Q | R | QR | benign            |
| rs364111 | XP_375634 | R | Q | RQ | benign            |
| rs364146 | XP_371430 | S | F | SF | possibly damaging |
| rs364427 | NP_703146 | F | L | FL | benign            |
| rs364435 | NP_703146 | L | V | LV | benign            |
| rs364444 | NP_703146 | T | S | TS | benign            |

|          |           |   |   |    |                   |
|----------|-----------|---|---|----|-------------------|
| rs364637 | NP_000141 | Q | K | QK | benign            |
| rs364891 | NP_055561 | T | A | TA | benign            |
| rs364897 | NP_000148 | N | S | NS | benign            |
| rs365331 | NP_031361 | D | E | DE | benign            |
| rs365331 | NP_031363 | D | E | DE | benign            |
| rs365331 | NP_031364 | D | E | DE | benign            |
| rs365331 | NP_031362 | D | E | DE | benign            |
| rs365745 | NP_037491 | T | S | TS | benign            |
| rs365915 | XP_497031 | D | N | DN | benign            |
| rs365915 | XP_372092 | N | D | ND | benign            |
| rs365990 | NP_002462 | A | V | AV | benign            |
| rs366111 | NP_037491 | R | G | RG | benign            |
| rs366439 | NP_003231 | S | L | SL | benign            |
| rs366793 | NP_060730 | I | T | IT | possibly damaging |
| rs366837 | NP_542790 | T | A | TA | benign            |
| rs367923 | NP_037387 | Q | P | QP | possibly damaging |
| rs368060 | NP_000148 | A | P | AP | probably damaging |
| rs368844 | NP_002146 | R | Q | RQ | benign            |
| rs368865 | XP_085028 | M | V | MV | benign            |
| rs369636 | NP_054724 | K | Q | KQ | benign            |
| rs369636 | NP_114063 | K | Q | KQ | benign            |
| rs369639 | NP_054724 | K | T | KT | benign            |
| rs369639 | NP_114063 | K | T | KT | benign            |
| rs369998 | NP_991111 | T | I | TI | possibly damaging |
| rs370094 | NP_001965 | A | V | AV | benign            |
| rs370289 | XP_497031 | L | P | LP | benign            |
| rs370289 | XP_372092 | P | L | PL | possibly damaging |
| rs370429 | NP_006188 | T | I | TI | benign            |
| rs370465 | NP_003725 | N | D | ND | benign            |
| rs370551 | XP_292832 | T | A | TA | benign            |
| rs370752 | NP_998762 | T | M | TM | benign            |
| rs371404 | XP_375569 | S | R | SR | benign            |
| rs371513 | NP_689825 | G | R | GR | possibly damaging |
| rs371523 | NP_002847 | A | P | AP | benign            |
| rs371715 | NP_037456 | P | H | PH | benign            |
| rs371715 | NP_659508 | P | H | PH | benign            |
| rs371749 | NP_001143 | R | L | RL | benign            |
| rs372725 | NP_000140 | N | S | NS | benign            |
| rs373032 | NP_005865 | D | E | DE | benign            |
| rs373381 | NP_000140 | P | S | PS | benign            |
| rs373381 | NP_002025 | S | P | SP | benign            |
| rs373496 | NP_001183 | N | S | NS | benign            |
| rs373533 | NP_001965 | K | Q | KQ | benign            |
| rs373554 | NP_060730 | K | T | KT | probably damaging |
| rs373572 | NP_064550 | Q | R | QR | benign            |
| rs373854 | NP_006854 | L | P | LP | benign            |

|          |           |   |   |    |                   |
|----------|-----------|---|---|----|-------------------|
| rs374045 | NP_775814 | H | R | HR | benign            |
| rs374230 | XP_375187 | P | L | PL | possibly damaging |
| rs375436 | NP_059991 | A | D | AD | benign            |
| rs376270 | NP_001288 | N | K | NK | possibly damaging |
| rs376618 | NP_075252 | P | L | PL | benign            |
| rs376618 | NP_998812 | P | L | PL | benign            |
| rs377408 | NP_859016 | T | A | TA | benign            |
| rs377840 | NP_443116 | L | V | LV | benign            |
| rs377860 | NP_000029 | K | Q | KQ | benign            |
| rs378098 | NP_872599 | P | S | PS | possibly damaging |
| rs378127 | XP_497481 | E | K | EK | benign            |
| rs378483 | NP_543013 | P | L | PL | benign            |
| rs379147 | NP_003544 | F | C | FC | probably damaging |
| rs379370 | NP_006675 | S | P | SP | benign            |
| rs379707 | NP_955367 | V | F | VF | benign            |
| rs379707 | NP_001456 | V | F | VF | benign            |
| rs379856 | NP_003544 | S | P | SP | benign            |
| rs380585 | NP_941967 | F | C | FC | benign            |
| rs380736 | NP_079199 | L | I | LI | benign            |
| rs381143 | NP_742017 | L | P | LP | probably damaging |
| rs381418 | NP_000148 | N | K | NK | benign            |
| rs381427 | NP_000148 | V | G | VG | possibly damaging |
| rs381484 | NP_037411 | M | I | MI | possibly damaging |
| rs381737 | NP_000148 | F | I | FI | benign            |
| rs382212 | XP_374318 | R | G | RG | possibly damaging |
| rs382524 | NP_000164 | A | S | AS | benign            |
| rs382627 | NP_067674 | L | P | LP | benign            |
| rs382771 | NP_005295 | Q | R | QR | benign            |
| rs382771 | NP_005296 | R | Q | RQ | benign            |
| rs382789 | NP_954648 | E | K | EK | benign            |
| rs382789 | NP_115499 | E | K | EK | benign            |
| rs382789 | NP_954649 | E | K | EK | benign            |
| rs383038 | XP_292832 | F | L | FL | benign            |
| rs383369 | NP_005865 | H | R | HR | benign            |
| rs384081 | NP_061759 | L | P | LP | benign            |
| rs384403 | XP_496496 | G | R | GR | possibly damaging |
| rs384403 | XP_496500 | R | G | RG | possibly damaging |
| rs384487 | NP_000080 | S | P | SP | benign            |
| rs386056 | NP_005865 | V | M | VM | benign            |
| rs386269 | XP_496050 | Q | H | QH | benign            |
| rs386598 | NP_057294 | A | D | AD | benign            |
| rs386820 | NP_733793 | Q | H | QH | benign            |
| rs386820 | NP_004832 | Q | H | QH | possibly damaging |
| rs387416 | XP_371430 | Q | R | QR | benign            |
| rs388218 | NP_002146 | S | I | SI | possibly damaging |
| rs388685 | NP_003416 | P | R | PR | benign            |

|          |              |   |   |    |                   |
|----------|--------------|---|---|----|-------------------|
| rs388703 | XP_496034    | A | T | AT | benign            |
| rs388706 | NP_003416    | T | A | TA | benign            |
| rs388862 | NP_002104    | Q | E | QE | benign            |
| rs389088 | NP_037411    | M | I | MI | benign            |
| rs389319 | NP_060738    | G | D | GD | possibly damaging |
| rs389624 | NP_659479    | D | A | DA | benign            |
| rs390427 | XP_372343    | F | S | FS | benign            |
| rs390427 | XP_114987    | S | F | SF | benign            |
| rs390659 | NP_000313    | E | Q | EQ | possibly damaging |
| rs391026 | XP_498195    | M | I | MI | possibly damaging |
| rs391125 | NP_002146    | T | A | TA | benign            |
| rs391326 | NP_067628    | P | T | PT | benign            |
| rs391326 | NP_036258    | T | P | TP | benign            |
| rs391326 | NP_078809    | T | P | TP | possibly damaging |
| rs391768 | NP_057066    | R | Q | RQ | benign            |
| rs392609 | NP_000080    | L | F | LF | benign            |
| rs392610 | NP_001002029 | S | Y | SY | benign            |
| rs392610 | NP_000583    | Y | S | YS | benign            |
| rs392713 | XP_374318    | Q | R | QR | benign            |
| rs392824 | XP_499223    | R | G | RG | possibly damaging |
| rs393014 | XP_370838    | A | E | AE | possibly damaging |
| rs393014 | XP_496050    | E | A | EA | possibly damaging |
| rs393063 | XP_496895    | I | T | IT | benign            |
| rs393063 | NP_742017    | I | T | IT | benign            |
| rs393599 | NP_006855    | D | N | DN | benign            |
| rs393949 | NP_057442    | E | G | EG | possibly damaging |
| rs393956 | NP_057442    | E | G | EG | possibly damaging |
| rs394558 | XP_376203    | V | I | VI | benign            |
| rs394732 | NP_003648    | Q | K | QK | benign            |
| rs394965 | NP_002146    | R | H | RH | benign            |
| rs395127 | NP_115534    | A | V | AV | benign            |
| rs395127 | NP_683881    | A | V | AV | benign            |
| rs395127 | NP_683738    | A | V | AV | benign            |
| rs395408 | NP_079199    | P | R | PR | probably damaging |
| rs395420 | XP_294590    | R | Q | RQ | benign            |
| rs395763 | XP_290401    | G | S | GS | benign            |
| rs396058 | NP_115897    | M | V | MV | benign            |
| rs396190 | NP_005671    | I | V | IV | benign            |
| rs396716 | NP_000560    | Y | H | YH | benign            |
| rs396946 | XP_497714    | T | A | TA | benign            |
| rs396991 | NP_000560    | V | F | VF | benign            |
| rs397205 | NP_110413    | A | T | AT | benign            |
| rs397861 | NP_003725    | R | Q | RQ | benign            |
| rs398003 | XP_290401    | T | A | TA | benign            |
| rs398064 | NP_003050    | L | V | LV | benign            |
| rs398235 | NP_003436    | I | F | IF | benign            |

|          |           |   |   |    |                   |
|----------|-----------|---|---|----|-------------------|
| rs398235 | NP_932355 | I | F | IF | benign            |
| rs398263 | NP_612190 | Q | K | QK | benign            |
| rs398263 | NP_066984 | Q | K | QK | benign            |
| rs398263 | NP_612191 | Q | K | QK | benign            |
| rs398607 | NP_000144 | I | T | IT | benign            |
| rs398829 | NP_055059 | V | I | VI | benign            |
| rs399098 | NP_003416 | R | K | RK | benign            |
| rs399140 | XP_371430 | A | T | AT | benign            |
| rs399145 | NP_002650 | T | A | TA | benign            |
| rs399340 | XP_498195 | R | K | RK | benign            |
| rs399482 | NP_941966 | D | V | DV | probably damaging |
| rs399490 | NP_066405 | K | N | KN | benign            |
| rs400282 | NP_115534 | W | S | WS | probably damaging |
| rs400282 | NP_683881 | W | S | WS | probably damaging |
| rs400282 | NP_683738 | W | S | WS | probably damaging |
| rs400377 | NP_000067 | T | S | TS | benign            |
| rs400562 | NP_056484 | S | P | SP | benign            |
| rs400835 | NP_002146 | R | Q | RQ | benign            |
| rs401003 | NP_982258 | Q | H | QH | benign            |
| rs401091 | XP_498195 | F | S | FS | possibly damaging |
| rs401292 | XP_498195 | R | W | RW | benign            |
| rs401640 | NP_005712 | D | H | DH | probably damaging |
| rs401641 | NP_006151 | E | D | ED | benign            |
| rs401757 | XP_374318 | S | L | SL | benign            |
| rs402286 | XP_499223 | R | G | RG | possibly damaging |
| rs402680 | NP_003725 | R | Q | RQ | benign            |
| rs403016 | NP_000560 | R | S | RS | benign            |
| rs403989 | NP_005295 | L | V | LV | benign            |
| rs403989 | NP_005296 | V | L | VL | benign            |
| rs404299 | NP_954648 | A | T | AT | benign            |
| rs404299 | NP_115499 | A | T | AT | benign            |
| rs404299 | NP_954649 | A | T | AT | benign            |
| rs404527 | NP_056222 | C | W | CW | probably damaging |
| rs405397 | XP_028522 | V | I | VI | benign            |
| rs406113 | NP_874360 | F | L | FL | benign            |
| rs406141 | NP_009043 | P | T | PT | probably damaging |
| rs406459 | NP_006364 | E | Q | EQ | benign            |
| rs406970 | NP_002305 | G | S | GS | benign            |
| rs406970 | NP_058015 | G | S | GS | benign            |
| rs407371 | NP_005712 | Y | C | YC | probably damaging |
| rs407645 | NP_000140 | Q | R | QR | benign            |
| rs407645 | NP_002025 | R | Q | RQ | benign            |
| rs407731 | NP_003416 | R | K | RK | benign            |
| rs408038 | NP_003725 | V | M | VM | benign            |
| rs408535 | NP_000080 | A | G | AG | benign            |
| rs408911 | NP_443183 | A | T | AT | benign            |

|          |           |   |   |    |                   |
|----------|-----------|---|---|----|-------------------|
| rs409093 | NP_005297 | L | H | LH | probably damaging |
| rs409193 | NP_037411 | R | K | RK | benign            |
| rs409364 | XP_498195 | Y | H | YH | possibly damaging |
| rs409447 | NP_663620 | P | Q | PQ | possibly damaging |
| rs409652 | XP_496413 | R | G | RG | benign            |
| rs409674 | XP_496045 | L | P | LP | benign            |
| rs409674 | XP_496034 | P | L | PL | benign            |
| rs409782 | NP_658983 | L | V | LV | benign            |
| rs410232 | NP_000177 | V | L | VL | benign            |
| rs410232 | NP_002104 | V | L | VL | benign            |
| rs410352 | NP_054785 | E | K | EK | benign            |
| rs410400 | XP_372584 | P | R | PR | possibly damaging |
| rs411127 | NP_001788 | F | L | FL | benign            |
| rs411127 | NP_387513 | F | L | FL | benign            |
| rs411622 | XP_497999 | T | K | TK | benign            |
| rs411681 | XP_371430 | G | V | GV | benign            |
| rs412533 | NP_775109 | I | V | IV | benign            |
| rs412750 | NP_006188 | S | N | SN | benign            |
| rs412978 | XP_292021 | S | N | SN | benign            |
| rs413801 | NP_060779 | A | T | AT | benign            |
| rs414352 | NP_006260 | S | P | SP | benign            |
| rs414416 | XP_371243 | S | F | SF | probably damaging |
| rs414528 | NP_060937 | S | L | SL | possibly damaging |
| rs414702 | XP_498195 | Q | P | QP | benign            |
| rs414818 | NP_067628 | T | S | TS | benign            |
| rs415064 | NP_110400 | Q | H | QH | probably damaging |
| rs415610 | NP_036258 | P | S | PS | benign            |
| rs415610 | NP_078809 | P | S | PS | benign            |
| rs415793 | NP_038478 | S | N | SN | benign            |
| rs415895 | NP_055870 | E | Q | EQ | benign            |
| rs416185 | XP_496895 | P | T | PT | probably damaging |
| rs416185 | XP_290401 | T | P | TP | probably damaging |
| rs416507 | NP_054785 | E | K | EK | benign            |
| rs416574 | NP_976042 | V | A | VA | benign            |
| rs416574 | NP_976041 | V | A | VA | benign            |
| rs417079 | XP_496261 | R | C | RC | probably damaging |
| rs417341 | NP_000140 | R | G | RG | probably damaging |
| rs417707 | NP_002146 | V | F | VF | benign            |
| rs417751 | NP_005316 | T | I | TI | possibly damaging |
| rs417808 | NP_113610 | T | P | TP | benign            |
| rs418082 | XP_373672 | Q | H | QH | benign            |
| rs418495 | NP_031361 | D | A | DA | benign            |
| rs418495 | NP_031363 | D | A | DA | benign            |
| rs418495 | NP_031362 | D | A | DA | benign            |
| rs418495 | NP_031364 | D | A | DA | possibly damaging |
| rs418546 | NP_113610 | K | T | KT | possibly damaging |



|          |           |   |   |    |                   |
|----------|-----------|---|---|----|-------------------|
| rs418570 | NP_000080 | H | Q | HQ | benign            |
| rs418638 | XP_496034 | M | V | MV | benign            |
| rs418638 | XP_496046 | V | M | VM | benign            |
| rs418888 | NP_057257 | L | M | LM | benign            |
| rs419160 | NP_037456 | H | Q | HQ | probably damaging |
| rs419160 | NP_659508 | H | Q | HQ | probably damaging |
| rs419164 | NP_031361 | Q | H | QH | benign            |
| rs419164 | NP_031363 | Q | H | QH | benign            |
| rs419164 | NP_031364 | Q | H | QH | benign            |
| rs419164 | NP_031362 | Q | H | QH | benign            |
| rs419182 | NP_031361 | N | Y | NY | benign            |
| rs419182 | NP_031363 | N | Y | NY | benign            |
| rs419182 | NP_031362 | N | Y | NY | benign            |
| rs419182 | NP_031364 | N | Y | NY | possibly damaging |
| rs419202 | NP_037456 | P | R | PR | probably damaging |
| rs419202 | NP_659508 | P | R | PR | probably damaging |
| rs419346 | NP_037456 | P | H | PH | probably damaging |
| rs419346 | NP_659508 | P | H | PH | probably damaging |
| rs419616 | NP_031361 | Q | P | QP | benign            |
| rs419616 | NP_031363 | Q | P | QP | benign            |
| rs419616 | NP_031362 | Q | P | QP | benign            |
| rs419616 | NP_031364 | Q | P | QP | possibly damaging |
| rs419653 | NP_055281 | I | T | IT | possibly damaging |
| rs420451 | XP_375634 | L | V | LV | benign            |
| rs421206 | XP_498195 | I | L | IL | benign            |
| rs421262 | NP_000144 | A | T | AT | benign            |
| rs421427 | NP_054785 | Q | H | QH | possibly damaging |
| rs422098 | XP_374318 | L | P | LP | possibly damaging |
| rs422145 | NP_065998 | R | C | RC | possibly damaging |
| rs422361 | NP_000080 | D | E | DE | benign            |
| rs422902 | XP_497258 | T | P | TP | possibly damaging |
| rs423074 | NP_689836 | E | K | EK | benign            |
| rs423120 | NP_859016 | S | C | SC | possibly damaging |
| rs423385 | NP_005296 | C | R | CR | possibly damaging |
| rs423385 | NP_005295 | R | C | RC | possibly damaging |
| rs424132 | NP_689570 | L | I | LI | benign            |
| rs424241 | NP_005295 | R | W | RW | possibly damaging |
| rs424241 | NP_005296 | W | R | WR | possibly damaging |
| rs424715 | NP_005295 | A | V | AV | benign            |
| rs424715 | NP_005296 | V | A | VA | benign            |
| rs424816 | XP_374318 | R | M | RM | benign            |
| rs425757 | NP_002104 | Y | H | YH | benign            |
| rs425876 | NP_000313 | K | R | KR | benign            |
| rs426453 | NP_060287 | N | S | NS | benign            |
| rs426938 | NP_085050 | P | A | PA | possibly damaging |
| rs427127 | NP_060730 | D | E | DE | benign            |

|          |              |   |   |    |                   |
|----------|--------------|---|---|----|-------------------|
| rs427206 | XP_290401    | T | A | TA | benign            |
| rs427300 | XP_499223    | D | G | DG | possibly damaging |
| rs427461 | XP_209140    | R | P | RP | probably damaging |
| rs427880 | NP_689570    | N | S | NS | benign            |
| rs428073 | NP_057365    | N | S | NS | benign            |
| rs428231 | NP_060700    | T | P | TP | benign            |
| rs428398 | NP_689801    | D | Y | DY | probably damaging |
| rs428785 | NP_008919    | A | P | AP | benign            |
| rs428888 | NP_000560    | D | N | DN | benign            |
| rs429329 | NP_000583    | A | T | AT | benign            |
| rs429329 | NP_001002029 | T | A | TA | benign            |
| rs429358 | NP_000032    | C | R | CR | probably damaging |
| rs429477 | NP_003231    | Q | R | QR | benign            |
| rs429710 | XP_290401    | K | R | KR | benign            |
| rs429710 | XP_496895    | K | R | KR | benign            |
| rs430296 | NP_612398    | P | L | PL | benign            |
| rs430554 | NP_775490    | V | A | VA | benign            |
| rs430945 | NP_006061    | A | V | AV | benign            |
| rs430991 | NP_068555    | H | Q | HQ | benign            |
| rs431371 | XP_371174    | I | L | IL | benign            |
| rs431818 | NP_065998    | V | I | VI | benign            |
| rs431898 | NP_003741    | K | N | KN | benign            |
| rs431994 | XP_499223    | R | C | RC | possibly damaging |
| rs432500 | NP_002572    | R | K | RK | benign            |
| rs433016 | NP_443116    | K | Q | KQ | benign            |
| rs433016 | XP_375634    | Q | K | QK | benign            |
| rs433032 | NP_079199    | A | P | AP | benign            |
| rs433272 | NP_068555    | T | N | TN | benign            |
| rs434127 | NP_006855    | H | N | HN | benign            |
| rs434331 | NP_059991    | A | D | AD | benign            |
| rs434473 | NP_000688    | N | S | NS | benign            |
| rs435590 | NP_037491    | P | A | PA | probably damaging |
| rs435727 | NP_803235    | G | R | GR | probably damaging |
| rs435728 | NP_803235    | G | A | GA | possibly damaging |
| rs436278 | NP_065998    | D | E | DE | benign            |
| rs436737 | NP_477352    | G | R | GR | probably damaging |
| rs437014 | NP_005546    | V | I | VI | benign            |
| rs437179 | NP_008860    | L | M | LM | benign            |
| rs438096 | NP_631944    | R | Q | RQ | benign            |
| rs438096 | NP_005465    | R | Q | RQ | benign            |
| rs438287 | NP_003725    | Y | H | YH | probably damaging |
| rs438363 | NP_208384    | N | S | NS | benign            |
| rs438766 | NP_005059    | L | F | LF | benign            |
| rs438804 | XP_290331    | R | W | RW | possibly damaging |
| rs438999 | NP_008860    | R | Q | RQ | benign            |
| rs439078 | NP_002146    | G | S | GS | benign            |

|          |           |   |   |    |                   |
|----------|-----------|---|---|----|-------------------|
| rs439676 | NP_037491 | R | C | RC | probably damaging |
| rs439825 | XP_496034 | R | Q | RQ | benign            |
| rs439898 | XP_496413 | W | R | WR | possibly damaging |
| rs439898 | NP_000148 | R | W | RW | probably damaging |
| rs440160 | NP_061978 | R | P | RP | possibly damaging |
| rs440731 | NP_443116 | R | W | RW | benign            |
| rs440731 | XP_375634 | W | R | WR | possibly damaging |
| rs440755 | NP_005365 | Q | H | QH | benign            |
| rs441071 | NP_009036 | R | G | RG | possibly damaging |
| rs441610 | NP_000140 | L | M | LM | benign            |
| rs441827 | NP_604393 | T | A | TA | benign            |
| rs442275 | NP_002462 | Q | E | QE | possibly damaging |
| rs442800 | NP_775814 | K | E | KE | benign            |
| rs443082 | NP_000560 | G | D | GD | benign            |
| rs443225 | NP_031361 | Q | H | QH | benign            |
| rs443225 | NP_031363 | Q | H | QH | benign            |
| rs443225 | NP_031362 | Q | H | QH | benign            |
| rs443225 | NP_031364 | Q | H | QH | possibly damaging |
| rs443563 | NP_775821 | I | N | IN | benign            |
| rs443658 | NP_001965 | N | S | NS | benign            |
| rs443751 | NP_075565 | R | K | RK | benign            |
| rs444172 | NP_060730 | R | C | RC | benign            |
| rs444527 | NP_689836 | R | W | RW | benign            |
| rs444772 | NP_006260 | R | H | RH | benign            |
| rs445154 | NP_002572 | P | L | PL | probably damaging |
| rs445159 | NP_002572 | P | L | PL | probably damaging |
| rs445895 | XP_499223 | L | P | LP | possibly damaging |
| rs446014 | NP_954648 | R | S | RS | possibly damaging |
| rs446014 | NP_115499 | R | S | RS | possibly damaging |
| rs446014 | NP_954649 | R | S | RS | possibly damaging |
| rs446227 | NP_006260 | A | T | AT | benign            |
| rs446644 | NP_775814 | A | T | AT | benign            |
| rs447017 | NP_892029 | S | R | SR | benign            |
| rs447727 | NP_942568 | L | V | LV | benign            |
| rs447802 | NP_060178 | A | T | AT | benign            |
| rs448012 | NP_002011 | Q | H | QH | benign            |
| rs448012 | NP_891555 | Q | H | QH | benign            |
| rs448076 | NP_031361 | L | F | LF | benign            |
| rs448076 | NP_031363 | L | F | LF | benign            |
| rs448076 | NP_031364 | L | F | LF | benign            |
| rs448076 | NP_031362 | L | F | LF | benign            |
| rs448446 | NP_689570 | P | R | PR | probably damaging |
| rs448740 | NP_000560 | S | N | SN | benign            |
| rs448921 | NP_003436 | R | H | RH | benign            |
| rs448921 | NP_932355 | R | H | RH | benign            |
| rs449000 | NP_663620 | D | E | DE | benign            |

|          |           |   |   |    |                   |
|----------|-----------|---|---|----|-------------------|
| rs449407 | NP_114062 | T | N | TN | benign            |
| rs449407 | NP_061734 | T | N | TN | benign            |
| rs449643 | NP_008860 | V | A | VA | benign            |
| rs449709 | XP_374318 | Q | R | QR | benign            |
| rs449770 | NP_982258 | Q | H | QH | benign            |
| rs449856 | NP_000552 | S | T | ST | benign            |
| rs449856 | NP_666533 | S | T | ST | benign            |
| rs449856 | NP_000839 | T | S | TS | benign            |
| rs449911 | NP_703146 | W | C | WC | possibly damaging |
| rs450042 | XP_374318 | S | P | SP | benign            |
| rs450046 | NP_057419 | R | Q | RQ | benign            |
| rs450205 | NP_703146 | F | L | FL | benign            |
| rs450363 | NP_002146 | G | V | GV | probably damaging |
| rs450501 | XP_371243 | R | K | RK | benign            |
| rs451195 | NP_000934 | N | S | NS | benign            |
| rs451571 | NP_057023 | E | G | EG | benign            |
| rs451863 | NP_031361 | P | A | PA | possibly damaging |
| rs451863 | NP_031363 | P | A | PA | possibly damaging |
| rs451863 | NP_031364 | P | A | PA | possibly damaging |
| rs451863 | NP_031362 | P | A | PA | possibly damaging |
| rs452004 | NP_002146 | M | V | MV | benign            |
| rs452752 | NP_000832 | L | F | LF | benign            |
| rs452942 | NP_054762 | I | L | IL | benign            |
| rs454175 | NP_054762 | K | T | KT | benign            |
| rs454301 | NP_037491 | I | F | IF | benign            |
| rs454995 | XP_496146 | R | Q | RQ | benign            |
| rs455527 | NP_705900 | F | L | FL | benign            |
| rs455863 | NP_705615 | R | Q | RQ | benign            |
| rs456070 | NP_703190 | Q | K | QK | benign            |
| rs456070 | NP_703192 | Q | K | QK | possibly damaging |
| rs456070 | NP_116121 | Q | K | QK | possibly damaging |
| rs456392 | NP_003050 | Q | H | QH | benign            |
| rs457297 | XP_375931 | L | F | LF | benign            |
| rs457403 | XP_370958 | P | L | PL | probably damaging |
| rs457651 | NP_996916 | G | E | GE | possibly damaging |
| rs457651 | NP_996917 | G | E | GE | possibly damaging |
| rs457651 | NP_996915 | G | E | GE | possibly damaging |
| rs457755 | NP_996916 | G | R | GR | probably damaging |
| rs457755 | NP_996917 | G | R | GR | probably damaging |
| rs457755 | NP_996915 | G | R | GR | probably damaging |
| rs457857 | NP_001965 | I | V | IV | benign            |
| rs457896 | NP_945346 | L | R | LR | benign            |
| rs457947 | NP_008969 | A | G | AG | benign            |
| rs458017 | NP_002903 | C | Y | CY | benign            |
| rs458210 | NP_059990 | T | P | TP | benign            |
| rs458245 | XP_373053 | M | T | MT | benign            |

|          |           |   |   |    |                   |
|----------|-----------|---|---|----|-------------------|
| rs458273 | NP_037387 | D | H | DH | benign            |
| rs458683 | NP_002305 | P | L | PL | possibly damaging |
| rs458683 | NP_058015 | P | L | PL | probably damaging |
| rs458698 | NP_705615 | P | Q | PQ | probably damaging |
| rs458698 | NP_705616 | P | Q | PQ | probably damaging |
| rs459096 | NP_008969 | V | G | VG | possibly damaging |
| rs459552 | NP_000029 | D | V | DV | benign            |
| rs460184 | NP_000177 | V | A | VA | benign            |
| rs460589 | NP_848652 | A | G | AG | benign            |
| rs460897 | NP_000177 | S | L | SL | possibly damaging |
| rs461222 | NP_705615 | R | G | RG | possibly damaging |
| rs461222 | NP_705616 | R | G | RG | probably damaging |
| rs461285 | NP_037411 | T | N | TN | benign            |
| rs461645 | NP_001965 | I | V | IV | benign            |
| rs461653 | NP_061759 | T | S | TS | benign            |
| rs462007 | NP_941965 | C | R | CR | probably damaging |
| rs462733 | XP_373053 | M | L | ML | benign            |
| rs462779 | NP_002903 | I | T | IT | benign            |
| rs463312 | NP_110400 | Q | P | QP | probably damaging |
| rs464391 | NP_941967 | P | R | PR | benign            |
| rs464424 | NP_941967 | V | L | VL | benign            |
| rs464691 | NP_733764 | Y | S | YS | benign            |
| rs464691 | NP_653273 | Y | S | YS | possibly damaging |
| rs464696 | NP_653273 | T | P | TP | benign            |
| rs464696 | NP_733764 | T | P | TP | possibly damaging |
| rs465223 | XP_371813 | S | T | ST | benign            |
| rs465279 | NP_941961 | S | P | SP | benign            |
| rs466096 | NP_037387 | L | I | LI | benign            |
| rs466113 | NP_945346 | N | D | ND | benign            |
| rs466384 | NP_005443 | V | A | VA | possibly damaging |
| rs466519 | NP_037387 | P | H | PH | probably damaging |
| rs466876 | NP_001965 | T | M | TM | possibly damaging |
| rs467744 | NP_003874 | R | P | RP | probably damaging |
| rs468120 | XP_375243 | V | I | VI | benign            |
| rs468203 | NP_009049 | G | S | GS | benign            |
| rs469062 | NP_001953 | N | K | NK | possibly damaging |
| rs469390 | NP_002453 | I | V | IV | benign            |
| rs470035 | NP_598397 | R | G | RG | probably damaging |
| rs470117 | NP_689453 | E | K | EK | benign            |
| rs470117 | NP_689452 | E | K | EK | benign            |
| rs470208 | XP_372437 | T | A | TA | benign            |
| rs470365 | NP_004707 | A | T | AT | benign            |
| rs470365 | XP_113228 | T | A | TA | benign            |
| rs470428 | NP_005134 | T | A | TA | benign            |
| rs470897 | XP_113228 | G | R | GR | possibly damaging |
| rs470897 | NP_004707 | R | G | RG | possibly damaging |

|          |           |   |   |    |                   |
|----------|-----------|---|---|----|-------------------|
| rs470947 | NP_055039 | T | A | TA | benign            |
| rs471009 | XP_113228 | R | S | RS | benign            |
| rs471009 | NP_004707 | S | R | SR | benign            |
| rs471334 | NP_008877 | A | V | AV | benign            |
| rs471525 | XP_497082 | R | Q | RQ | benign            |
| rs472287 | NP_612425 | P | R | PR | probably damaging |
| rs472442 | XP_372436 | S | N | SN | benign            |
| rs473009 | XP_497309 | E | D | ED | benign            |
| rs473076 | XP_496692 | M | T | MT | benign            |
| rs473093 | NP_004707 | R | Q | RQ | benign            |
| rs473131 | NP_004707 | H | Y | HY | benign            |
| rs473267 | NP_056414 | D | N | DN | possibly damaging |
| rs473840 | XP_113228 | M | R | MR | benign            |
| rs473937 | XP_113228 | N | S | NS | benign            |
| rs474299 | XP_371304 | T | M | TM | probably damaging |
| rs474299 | XP_371302 | T | M | TM | probably damaging |
| rs474474 | NP_443128 | H | R | HR | benign            |
| rs474536 | NP_115646 | G | D | GD | benign            |
| rs475002 | NP_003074 | L | V | LV | benign            |
| rs475076 | NP_689766 | V | I | VI | benign            |
| rs475807 | XP_497720 | A | S | AS | benign            |
| rs475911 | NP_001097 | I | S | IS | probably damaging |
| rs475923 | NP_940936 | Y | N | YN | probably damaging |
| rs475947 | XP_496032 | T | M | TM | probably damaging |
| rs476188 | XP_371304 | P | H | PH | probably damaging |
| rs476188 | XP_371302 | P | H | PH | probably damaging |
| rs477207 | NP_003725 | G | S | GS | benign            |
| rs477830 | NP_361013 | S | G | SG | benign            |
| rs478185 | NP_848660 | G | E | GE | possibly damaging |
| rs478812 | NP_006009 | I | S | IS | benign            |
| rs479085 | XP_034717 | D | E | DE | benign            |
| rs479175 | XP_034717 | H | R | HR | benign            |
| rs479448 | NP_999841 | Y | C | YC | probably damaging |
| rs479448 | NP_999842 | Y | C | YC | probably damaging |
| rs479448 | NP_999843 | Y | C | YC | probably damaging |
| rs479448 | NP_999844 | Y | C | YC | probably damaging |
| rs479448 | NP_999840 | Y | C | YC | probably damaging |
| rs479499 | NP_963917 | Q | K | QK | benign            |
| rs479499 | NP_612210 | Q | K | QK | benign            |
| rs479588 | NP_536739 | S | A | SA | benign            |
| rs479612 | NP_076984 | Q | H | QH | benign            |
| rs479617 | NP_076984 | K | T | KT | possibly damaging |
| rs479632 | NP_002644 | A | G | AG | benign            |
| rs479661 | NP_443178 | E | G | EG | possibly damaging |
| rs479917 | XP_212238 | R | W | RW | benign            |
| rs480625 | XP_370872 | D | N | DN | possibly damaging |

|          |           |   |   |    |                   |
|----------|-----------|---|---|----|-------------------|
| rs480727 | NP_112190 | A | T | AT | benign            |
| rs480963 | NP_940949 | V | A | VA | benign            |
| rs481119 | XP_290923 | G | V | GV | benign            |
| rs482082 | NP_079039 | R | Q | RQ | benign            |
| rs482145 | NP_005518 | T | M | TM | probably damaging |
| rs482849 | XP_212241 | H | Y | HY | benign            |
| rs482849 | XP_212238 | Y | H | YH | benign            |
| rs482912 | NP_055213 | I | V | IV | benign            |
| rs483638 | NP_005337 | S | N | SN | benign            |
| rs484373 | NP_004458 | T | I | TI | benign            |
| rs484373 | NP_671736 | T | I | TI | benign            |
| rs484373 | NP_963846 | T | I | TI | benign            |
| rs484373 | NP_963847 | T | I | TI | benign            |
| rs484770 | NP_002262 | E | K | EK | possibly damaging |
| rs484870 | NP_940936 | D | G | DG | possibly damaging |
| rs486055 | NP_002416 | R | K | RK | benign            |
| rs486473 | XP_497999 | R | G | RG | possibly damaging |
| rs486770 | NP_065208 | T | P | TP | possibly damaging |
| rs486770 | NP_065209 | T | P | TP | possibly damaging |
| rs486770 | NP_000028 | T | P | TP | possibly damaging |
| rs486770 | NP_065210 | T | P | TP | possibly damaging |
| rs486907 | NP_066956 | R | Q | RQ | benign            |
| rs486914 | XP_371677 | E | K | EK | benign            |
| rs487230 | XP_371254 | V | A | VA | benign            |
| rs487848 | NP_006587 | A | V | AV | benign            |
| rs487848 | NP_955452 | A | V | AV | benign            |
| rs487956 | NP_004779 | S | R | SR | benign            |
| rs487989 | NP_002680 | G | R | GR | benign            |
| rs488018 | NP_036368 | D | N | DN | possibly damaging |
| rs488228 | NP_665808 | G | A | GA | benign            |
| rs488295 | NP_071403 | G | S | GS | possibly damaging |
| rs491160 | XP_166869 | P | T | PT | benign            |
| rs491208 | XP_372548 | F | L | FL | possibly damaging |
| rs491333 | NP_079060 | K | Q | KQ | benign            |
| rs491671 | NP_060310 | R | C | RC | benign            |
| rs491684 | NP_945342 | L | W | LW | possibly damaging |
| rs492193 | NP_055397 | F | Y | FY | benign            |
| rs492594 | NP_066999 | V | L | VL | benign            |
| rs494791 | NP_068597 | F | L | FL | benign            |
| rs495294 | NP_065796 | A | D | AD | benign            |
| rs495335 | NP_006052 | S | P | SP | benign            |
| rs495820 | NP_037438 | R | C | RC | benign            |
| rs496207 | NP_003817 | L | F | LF | benign            |
| rs496420 | XP_372563 | W | S | WS | probably damaging |
| rs496420 | XP_372565 | W | S | WS | probably damaging |
| rs497554 | NP_055972 | R | W | RW | possibly damaging |

|          |           |   |   |    |                   |
|----------|-----------|---|---|----|-------------------|
| rs498055 | XP_495845 | D | E | DE | benign            |
| rs498336 | XP_294634 | L | M | LM | benign            |
| rs499895 | XP_290331 | M | V | MV | benign            |
| rs500049 | XP_290923 | A | V | AV | benign            |
| rs500611 | NP_001097 | E | D | ED | benign            |
| rs500969 | XP_496194 | R | Q | RQ | benign            |
| rs501590 | XP_371028 | L | V | LV | benign            |
| rs502209 | NP_001513 | Q | R | QR | benign            |
| rs502569 | XP_495898 | R | C | RC | probably damaging |
| rs502882 | NP_065895 | E | G | EG | benign            |
| rs503063 | NP_112493 | K | Q | KQ | benign            |
| rs503223 | XP_372436 | G | S | GS | benign            |
| rs504122 | NP_005833 | P | S | PS | benign            |
| rs504280 | XP_496300 | R | Q | RQ | possibly damaging |
| rs504465 | NP_065208 | A | P | AP | benign            |
| rs504465 | NP_065209 | A | P | AP | benign            |
| rs504465 | NP_000028 | A | P | AP | benign            |
| rs504465 | NP_065210 | A | P | AP | possibly damaging |
| rs504593 | NP_699193 | Q | R | QR | benign            |
| rs504815 | XP_376965 | E | K | EK | benign            |
| rs505151 | NP_777596 | G | E | GE | possibly damaging |
| rs505480 | NP_065895 | P | T | PT | benign            |
| rs505760 | NP_060570 | E | K | EK | benign            |
| rs506028 | NP_008877 | V | A | VA | benign            |
| rs506425 | NP_065955 | I | V | IV | benign            |
| rs506504 | NP_001265 | V | I | VI | benign            |
| rs507329 | NP_112190 | R | C | RC | probably damaging |
| rs507335 | XP_372441 | H | R | HR | benign            |
| rs507360 | XP_372441 | Q | R | QR | benign            |
| rs507879 | NP_004338 | A | T | AT | benign            |
| rs507959 | XP_497720 | L | P | LP | probably damaging |
| rs508405 | NP_653176 | A | T | AT | benign            |
| rs509941 | NP_115885 | L | V | LV | benign            |
| rs509962 | NP_115885 | K | N | KN | benign            |
| rs510145 | NP_060236 | Y | H | YH | possibly damaging |
| rs510579 | NP_659417 | M | I | MI | benign            |
| rs510643 | XP_034717 | G | S | GS | benign            |
| rs510737 | NP_542780 | V | G | VG | possibly damaging |
| rs510858 | NP_849192 | D | H | DH | probably damaging |
| rs511280 | XP_212238 | L | F | LF | benign            |
| rs512110 | XP_041018 | A | T | AT | benign            |
| rs512215 | XP_087254 | E | K | EK | benign            |
| rs512327 | XP_212238 | E | Q | EQ | benign            |
| rs512327 | XP_212241 | Q | E | QE | benign            |
| rs512437 | XP_212241 | I | V | IV | benign            |
| rs512437 | XP_212238 | I | V | IV | benign            |



|          |           |   |   |    |                   |
|----------|-----------|---|---|----|-------------------|
| rs512736 | XP_497472 | Q | E | QE | benign            |
| rs513094 | XP_212238 | K | T | KT | benign            |
| rs513094 | XP_212241 | T | K | TK | benign            |
| rs513591 | XP_372437 | T | S | TS | benign            |
| rs513964 | NP_002412 | D | G | DG | probably damaging |
| rs514521 | NP_068658 | S | R | SR | possibly damaging |
| rs514521 | NP_004349 | S | R | SR | possibly damaging |
| rs514521 | NP_997695 | S | R | SR | possibly damaging |
| rs514521 | NP_068660 | S | R | SR | possibly damaging |
| rs514523 | NP_068658 | S | T | ST | benign            |
| rs514523 | NP_004349 | S | T | ST | benign            |
| rs514523 | NP_997695 | S | T | ST | benign            |
| rs514523 | NP_068660 | S | T | ST | benign            |
| rs514970 | NP_954651 | P | S | PS | probably damaging |
| rs515299 | NP_000177 | S | I | SI | possibly damaging |
| rs515457 | XP_497472 | E | D | ED | benign            |
| rs515582 | NP_579891 | A | S | AS | benign            |
| rs517634 | XP_041018 | T | A | TA | benign            |
| rs517733 | NP_954651 | S | C | SC | benign            |
| rs518835 | NP_005924 | S | L | SL | benign            |
| rs519972 | NP_000798 | A | T | AT | benign            |
| rs520004 | XP_372563 | D | N | DN | benign            |
| rs520004 | XP_372565 | D | N | DN | benign            |
| rs520611 | NP_004101 | Q | H | QH | possibly damaging |
| rs520611 | NP_077728 | Q | H | QH | possibly damaging |
| rs520713 | NP_003189 | V | I | VI | benign            |
| rs520805 | NP_005413 | A | V | AV | benign            |
| rs522063 | NP_689809 | T | A | TA | benign            |
| rs522496 | NP_065867 | M | V | MV | possibly damaging |
| rs522835 | XP_498198 | G | E | GE | possibly damaging |
| rs522839 | XP_498198 | A | T | AT | benign            |
| rs523104 | NP_004338 | V | L | VL | benign            |
| rs523747 | NP_068815 | E | K | EK | benign            |
| rs524523 | NP_060340 | R | H | RH | benign            |
| rs524523 | NP_821174 | R | H | RH | benign            |
| rs524529 | XP_498198 | P | S | PS | benign            |
| rs524603 | XP_372563 | A | E | AE | benign            |
| rs524603 | XP_372565 | A | E | AE | benign            |
| rs524625 | NP_942093 | G | E | GE | probably damaging |
| rs525409 | NP_940948 | V | L | VL | benign            |
| rs525886 | NP_114062 | P | R | PR | benign            |
| rs525886 | NP_061734 | P | R | PR | benign            |
| rs525941 | NP_114062 | K | R | KR | benign            |
| rs525941 | NP_061734 | K | R | KR | benign            |
| rs526106 | XP_377742 | S | T | ST | benign            |
| rs526607 | XP_495946 | W | R | WR | probably damaging |

|          |           |   |   |    |                   |
|----------|-----------|---|---|----|-------------------|
| rs527025 | XP_292723 | P | S | PS | possibly damaging |
| rs527221 | NP_004400 | L | V | LV | benign            |
| rs528255 | NP_065895 | R | H | RH | benign            |
| rs529038 | NP_002935 | D | N | DN | benign            |
| rs529156 | NP_002935 | K | Q | KQ | benign            |
| rs529208 | NP_982272 | P | T | PT | possibly damaging |
| rs530258 | NP_463459 | F | S | FS | probably damaging |
| rs530258 | NP_055090 | F | S | FS | probably damaging |
| rs530413 | NP_002501 | N | H | NH | benign            |
| rs530436 | NP_002501 | S | C | SC | possibly damaging |
| rs530517 | XP_372719 | T | S | TS | benign            |
| rs530978 | XP_041018 | T | M | TM | benign            |
| rs530992 | XP_372441 | M | I | MI | benign            |
| rs532411 | NP_006587 | A | V | AV | benign            |
| rs532411 | NP_955452 | A | V | AV | benign            |
| rs532598 | NP_705872 | S | N | SN | benign            |
| rs532598 | NP_065909 | S | N | SN | benign            |
| rs532598 | NP_705871 | S | N | SN | benign            |
| rs532598 | NP_705870 | S | N | SN | benign            |
| rs532598 | NP_705869 | S | N | SN | benign            |
| rs532648 | NP_003584 | A | P | AP | possibly damaging |
| rs532841 | NP_006085 | V | M | VM | benign            |
| rs532841 | NP_872584 | V | M | VM | benign            |
| rs532964 | NP_037523 | S | P | SP | benign            |
| rs533617 | NP_000375 | H | R | HR | probably damaging |
| rs534399 | NP_000177 | V | L | VL | benign            |
| rs534516 | NP_001097 | E | G | EG | probably damaging |
| rs534749 | NP_006838 | Q | R | QR | benign            |
| rs534751 | NP_006838 | K | E | KE | benign            |
| rs535034 | XP_496032 | L | F | LF | benign            |
| rs535237 | NP_000375 | L | V | LV | benign            |
| rs535630 | NP_000130 | N | K | NK | benign            |
| rs535810 | XP_371273 | T | P | TP | possibly damaging |
| rs536009 | NP_061142 | A | S | AS | benign            |
| rs536009 | NP_758424 | A | S | AS | benign            |
| rs536119 | XP_046264 | Q | R | QR | benign            |
| rs536234 | NP_031371 | C | G | CG | probably damaging |
| rs536455 | NP_002719 | H | Y | HY | benign            |
| rs537057 | NP_001922 | S | F | SF | possibly damaging |
| rs537060 | NP_001922 | L | F | LF | benign            |
| rs537079 | XP_497039 | T | R | TR | benign            |
| rs537079 | XP_497029 | T | R | TR | benign            |
| rs537349 | NP_620829 | M | V | MV | benign            |
| rs537349 | NP_620832 | M | V | MV | benign            |
| rs537349 | NP_620830 | M | V | MV | benign            |
| rs537816 | NP_005207 | G | R | GR | possibly damaging |

|          |           |   |   |    |                   |
|----------|-----------|---|---|----|-------------------|
| rs539351 | NP_663630 | E | D | ED | benign            |
| rs539765 | NP_620427 | R | C | RC | probably damaging |
| rs539765 | NP_620428 | R | C | RC | probably damaging |
| rs539765 | NP_620429 | R | C | RC | probably damaging |
| rs539765 | NP_036236 | R | C | RC | probably damaging |
| rs540045 | NP_954636 | K | Q | KQ | benign            |
| rs540687 | NP_006084 | T | I | TI | possibly damaging |
| rs540742 | NP_060125 | L | P | LP | benign            |
| rs540751 | NP_659417 | T | M | TM | benign            |
| rs540874 | NP_001095 | R | Q | RQ | benign            |
| rs540967 | NP_060417 | G | S | GS | benign            |
| rs541641 | XP_370840 | Y | S | YS | probably damaging |
| rs542089 | NP_835225 | W | C | WC | probably damaging |
| rs542939 | NP_937790 | A | T | AT | benign            |
| rs542998 | NP_958831 | V | A | VA | benign            |
| rs543294 | NP_037397 | A | P | AP | benign            |
| rs543355 | NP_005550 | T | A | TA | benign            |
| rs543472 | XP_496692 | R | Q | RQ | benign            |
| rs543573 | NP_055861 | V | I | VI | benign            |
| rs543580 | NP_057579 | L | W | LW | possibly damaging |
| rs544198 | XP_372668 | M | L | ML | possibly damaging |
| rs544864 | XP_166227 | A | T | AT | benign            |
| rs545500 | NP_079404 | P | R | PR | benign            |
| rs545778 | XP_166256 | G | S | GS | benign            |
| rs545973 | NP_036566 | A | T | AT | benign            |
| rs546011 | XP_372891 | N | S | NS | benign            |
| rs546502 | NP_803172 | V | I | VI | benign            |
| rs546502 | NP_003617 | V | I | VI | benign            |
| rs546824 | XP_372891 | H | Q | HQ | benign            |
| rs546825 | XP_496502 | A | T | AT | benign            |
| rs546825 | NP_055163 | A | T | AT | benign            |
| rs546922 | XP_372891 | D | Y | DY | probably damaging |
| rs546941 | XP_372891 | N | S | NS | benign            |
| rs547068 | XP_372436 | L | P | LP | possibly damaging |
| rs547499 | NP_056049 | T | M | TM | benign            |
| rs547516 | XP_496300 | A | V | AV | possibly damaging |
| rs547809 | NP_005725 | S | F | SF | possibly damaging |
| rs547870 | XP_372436 | N | K | NK | benign            |
| rs549148 | NP_005469 | Q | L | QL | benign            |
| rs549474 | NP_005195 | R | K | RK | benign            |
| rs549990 | NP_112597 | S | A | SA | benign            |
| rs550252 | NP_003189 | A | V | AV | benign            |
| rs550510 | NP_005822 | G | E | GE | benign            |
| rs550625 | NP_060101 | V | M | VM | benign            |
| rs550676 | NP_612468 | Q | H | QH | benign            |
| rs550921 | NP_000008 | T | S | TS | benign            |

|          |           |   |   |    |                   |
|----------|-----------|---|---|----|-------------------|
| rs551134 | NP_000723 | D | A | DA | possibly damaging |
| rs551225 | NP_877435 | L | P | LP | probably damaging |
| rs551570 | NP_036371 | T | N | TN | benign            |
| rs553509 | XP_088735 | R | H | RH | possibly damaging |
| rs553717 | NP_004457 | A | V | AV | benign            |
| rs554202 | NP_079374 | M | V | MV | benign            |
| rs554499 | NP_002412 | Q | P | QP | benign            |
| rs554797 | NP_002418 | H | L | HL | probably damaging |
| rs554971 | NP_742150 | T | M | TM | benign            |
| rs555131 | NP_597705 | L | F | LF | benign            |
| rs556155 | NP_002152 | K | E | KE | benign            |
| rs556155 | NP_038203 | K | E | KE | benign            |
| rs556235 | NP_536739 | S | C | SC | possibly damaging |
| rs556337 | NP_009097 | F | L | FL | possibly damaging |
| rs556669 | NP_996810 | D | G | DG | benign            |
| rs556669 | NP_996811 | D | G | DG | benign            |
| rs556690 | XP_372632 | D | E | DE | benign            |
| rs557337 | XP_375032 | V | A | VA | benign            |
| rs557352 | XP_041018 | N | D | ND | benign            |
| rs557465 | NP_005924 | Q | P | QP | possibly damaging |
| rs557491 | NP_061142 | M | V | MV | benign            |
| rs557491 | NP_758424 | M | V | MV | benign            |
| rs557503 | NP_004706 | P | H | PH | possibly damaging |
| rs557503 | NP_430255 | P | H | PH | possibly damaging |
| rs557590 | XP_166868 | T | A | TA | benign            |
| rs557881 | NP_003035 | R | C | RC | benign            |
| rs558018 | NP_057240 | N | S | NS | possibly damaging |
| rs558018 | NP_958438 | N | S | NS | possibly damaging |
| rs558465 | XP_166868 | T | A | TA | benign            |
| rs558614 | NP_055387 | A | V | AV | benign            |
| rs558760 | NP_065867 | V | I | VI | benign            |
| rs558813 | NP_620143 | T | I | TI | possibly damaging |
| rs559449 | XP_166868 | L | P | LP | probably damaging |
| rs559527 | XP_499223 | I | V | IV | benign            |
| rs560096 | NP_002171 | S | L | SL | possibly damaging |
| rs560191 | NP_005648 | D | E | DE | benign            |
| rs560389 | XP_034086 | N | S | NS | benign            |
| rs560505 | NP_006772 | P | S | PS | benign            |
| rs561024 | XP_375720 | P | A | PA | possibly damaging |
| rs561037 | NP_443173 | E | K | EK | benign            |
| rs561042 | NP_443173 | E | G | EG | benign            |
| rs561704 | NP_037396 | M | R | MR | probably damaging |
| rs561958 | NP_116190 | E | G | EG | benign            |
| rs561970 | XP_041018 | S | G | SG | benign            |
| rs562047 | NP_005336 | D | E | DE | benign            |
| rs562092 | XP_498305 | N | K | NK | probably damaging |

|          |           |   |   |    |                   |
|----------|-----------|---|---|----|-------------------|
| rs562391 | NP_005459 | P | A | PA | possibly damaging |
| rs562392 | NP_005459 | R | S | RS | benign            |
| rs562556 | NP_777596 | V | I | VI | benign            |
| rs562578 | XP_027658 | D | H | DH | possibly damaging |
| rs563792 | NP_008851 | S | P | SP | possibly damaging |
| rs563868 | NP_060774 | R | Q | RQ | benign            |
| rs564271 | NP_612634 | R | C | RC | possibly damaging |
| rs565156 | XP_034086 | T | N | TN | benign            |
| rs565468 | NP_065203 | N | Y | NY | probably damaging |
| rs565668 | XP_034717 | N | D | ND | benign            |
| rs565866 | XP_034717 | V | M | VM | benign            |
| rs566334 | XP_370872 | K | E | KE | benign            |
| rs566362 | NP_000370 | N | K | NK | probably damaging |
| rs566576 | XP_034086 | V | I | VI | benign            |
| rs566655 | NP_005550 | N | T | NT | benign            |
| rs567083 | NP_005897 | P | S | PS | benign            |
| rs567949 | NP_003400 | I | F | IF | benign            |
| rs567954 | NP_003400 | T | P | TP | benign            |
| rs568413 | NP_000375 | C | Y | CY | probably damaging |
| rs569108 | NP_000130 | E | G | EG | probably damaging |
| rs569332 | NP_071403 | I | V | IV | benign            |
| rs569336 | XP_370651 | V | I | VI | benign            |
| rs569705 | NP_116193 | P | S | PS | probably damaging |
| rs570167 | NP_002146 | K | R | KR | benign            |
| rs570189 | NP_002146 | K | E | KE | benign            |
| rs570208 | NP_065091 | V | I | VI | benign            |
| rs570218 | NP_940949 | H | R | HR | possibly damaging |
| rs570297 | NP_065091 | A | E | AE | possibly damaging |
| rs570337 | NP_071403 | G | E | GE | probably damaging |
| rs571264 | NP_653278 | V | I | VI | benign            |
| rs571264 | NP_945193 | V | I | VI | benign            |
| rs571353 | NP_110419 | T | A | TA | benign            |
| rs571391 | NP_057331 | T | I | TI | benign            |
| rs571655 | NP_055917 | E | K | EK | benign            |
| rs572013 | NP_003363 | V | M | VM | benign            |
| rs572982 | NP_068599 | K | Q | KQ | benign            |
| rs573212 | NP_003828 | V | L | VL | benign            |
| rs573455 | XP_374936 | Q | R | QR | benign            |
| rs573724 | XP_378185 | I | T | IT | benign            |
| rs576180 | XP_210365 | T | I | TI | possibly damaging |
| rs576619 | NP_060101 | I | V | IV | benign            |
| rs576730 | NP_065705 | Y | S | YS | probably damaging |
| rs577249 | NP_006129 | N | H | NH | benign            |
| rs577294 | NP_057699 | V | I | VI | benign            |
| rs578430 | NP_005583 | V | L | VL | benign            |
| rs580065 | XP_371174 | R | T | RT | benign            |

|          |           |   |   |    |                   |
|----------|-----------|---|---|----|-------------------|
| rs580459 | NP_996810 | M | V | MV | possibly damaging |
| rs580459 | NP_996811 | M | V | MV | possibly damaging |
| rs580825 | NP_005050 | E | D | ED | benign            |
| rs580825 | NP_604390 | E | D | ED | benign            |
| rs581994 | XP_498305 | K | R | KR | benign            |
| rs582234 | NP_060909 | D | E | DE | benign            |
| rs582803 | NP_775831 | S | N | SN | benign            |
| rs583134 | NP_002068 | V | L | VL | benign            |
| rs583903 | NP_057593 | D | G | DG | benign            |
| rs584367 | NP_036532 | S | G | SG | benign            |
| rs584542 | NP_000375 | V | I | VI | benign            |
| rs584679 | XP_499223 | V | A | VA | benign            |
| rs584717 | NP_942154 | P | T | PT | possibly damaging |
| rs585033 | NP_940933 | M | L | ML | benign            |
| rs585209 | NP_060017 | V | G | VG | probably damaging |
| rs585627 | NP_055203 | Q | E | QE | benign            |
| rs585664 | NP_778253 | S | F | SF | probably damaging |
| rs586024 | NP_056049 | M | T | MT | possibly damaging |
| rs586178 | NP_057309 | W | C | WC | benign            |
| rs586178 | NP_057208 | W | C | WC | benign            |
| rs586339 | NP_055478 | E | A | EA | benign            |
| rs586542 | NP_066938 | Q | H | QH | possibly damaging |
| rs587404 | NP_149033 | A | T | AT | benign            |
| rs587404 | NP_036222 | A | T | AT | benign            |
| rs587660 | NP_005134 | S | P | SP | possibly damaging |
| rs588583 | NP_955468 | G | R | GR | possibly damaging |
| rs588583 | NP_055761 | G | R | GR | possibly damaging |
| rs589059 | XP_496391 | R | W | RW | benign            |
| rs589059 | XP_375869 | R | W | RW | benign            |
| rs589292 | NP_775961 | A | T | AT | benign            |
| rs589623 | XP_370652 | R | Q | RQ | benign            |
| rs590787 | NP_057309 | Y | C | YC | benign            |
| rs590787 | NP_057208 | Y | C | YC | benign            |
| rs590813 | NP_057309 | V | I | VI | benign            |
| rs590813 | NP_057208 | V | I | VI | benign            |
| rs591120 | NP_149118 | P | A | PA | benign            |
| rs591369 | XP_372403 | V | M | VM | benign            |
| rs591428 | NP_066387 | Q | H | QH | possibly damaging |
| rs591483 | NP_066387 | G | R | GR | possibly damaging |
| rs591530 | NP_066387 | G | R | GR | benign            |
| rs592121 | NP_001842 | S | P | SP | possibly damaging |
| rs592121 | NP_511040 | S | P | SP | possibly damaging |
| rs592351 | NP_066387 | E | Q | EQ | benign            |
| rs592595 | NP_067013 | L | F | LF | benign            |
| rs592644 | NP_775853 | V | I | VI | benign            |
| rs592727 | NP_067013 | S | F | SF | probably damaging |

|          |           |   |   |    |                   |
|----------|-----------|---|---|----|-------------------|
| rs593747 | NP_076418 | I | M | IM | benign            |
| rs593818 | NP_076433 | G | S | GS | benign            |
| rs594445 | NP_060417 | N | H | NH | probably damaging |
| rs594495 | NP_663630 | H | R | HR | benign            |
| rs594576 | XP_371304 | N | S | NS | probably damaging |
| rs594576 | XP_371302 | N | S | NS | probably damaging |
| rs595414 | XP_496159 | P | R | PR | possibly damaging |
| rs595689 | XP_212238 | D | E | DE | benign            |
| rs595689 | XP_212241 | E | D | ED | benign            |
| rs596220 | XP_371116 | L | W | LW | possibly damaging |
| rs596236 | XP_212241 | L | P | LP | possibly damaging |
| rs596236 | XP_212238 | P | L | PL | possibly damaging |
| rs596315 | NP_005550 | L | V | LV | benign            |
| rs596838 | NP_942154 | K | Q | KQ | benign            |
| rs596909 | NP_001062 | G | V | GV | probably damaging |
| rs597306 | NP_005061 | P | H | PH | possibly damaging |
| rs597306 | NP_963868 | P | H | PH | possibly damaging |
| rs597371 | NP_940898 | E | G | EG | probably damaging |
| rs597468 | NP_076410 | T | M | TM | probably damaging |
| rs597480 | NP_996810 | A | G | AG | benign            |
| rs597480 | NP_996811 | A | G | AG | benign            |
| rs597570 | NP_005094 | D | E | DE | benign            |
| rs597681 | NP_056952 | E | K | EK | benign            |
| rs597681 | NP_055326 | E | K | EK | benign            |
| rs597681 | NP_055034 | K | E | KE | benign            |
| rs598078 | NP_056100 | K | Q | KQ | benign            |
| rs598078 | NP_443066 | K | Q | KQ | benign            |
| rs598268 | XP_372719 | Y | H | YH | benign            |
| rs598278 | XP_372719 | K | T | KT | benign            |
| rs598475 | XP_212241 | M | T | MT | benign            |
| rs598475 | XP_212238 | T | M | TM | benign            |
| rs598709 | XP_372719 | R | G | RG | benign            |
| rs599199 | NP_001543 | V | G | VG | benign            |
| rs600499 | NP_689820 | H | Y | HY | benign            |
| rs600648 | NP_940891 | W | G | WG | probably damaging |
| rs600753 | NP_570722 | G | E | GE | benign            |
| rs601172 | NP_690591 | F | L | FL | benign            |
| rs601172 | NP_690590 | F | L | FL | possibly damaging |
| rs601172 | NP_071744 | F | L | FL | probably damaging |
| rs601314 | NP_058634 | V | I | VI | benign            |
| rs601558 | NP_848660 | P | L | PL | probably damaging |
| rs601684 | NP_055039 | V | L | VL | benign            |
| rs602224 | XP_372403 | T | I | TI | benign            |
| rs602444 | NP_703144 | H | Y | HY | probably damaging |
| rs602662 | NP_000502 | G | S | GS | benign            |
| rs602990 | NP_003362 | M | V | MV | benign            |

|          |           |   |   |    |                   |
|----------|-----------|---|---|----|-------------------|
| rs603280 | NP_055006 | S | F | SF | possibly damaging |
| rs604595 | NP_005600 | N | K | NK | probably damaging |
| rs604630 | NP_001326 | G | S | GS | benign            |
| rs605059 | NP_000404 | S | G | SG | benign            |
| rs605611 | XP_378185 | I | M | IM | benign            |
| rs605734 | XP_166834 | L | F | LF | benign            |
| rs606072 | NP_065799 | H | N | HN | possibly damaging |
| rs606226 | XP_497312 | D | N | DN | benign            |
| rs606226 | XP_497313 | E | G | EG | possibly damaging |
| rs606830 | NP_001326 | Q | R | QR | benign            |
| rs607159 | NP_002388 | S | F | SF | possibly damaging |
| rs607230 | NP_005550 | K | E | KE | benign            |
| rs607426 | NP_778238 | E | G | EG | benign            |
| rs607969 | NP_570711 | R | Q | RQ | benign            |
| rs607969 | NP_570716 | R | Q | RQ | benign            |
| rs608052 | NP_065895 | G | R | GR | benign            |
| rs608144 | NP_940936 | L | P | LP | probably damaging |
| rs608339 | NP_443173 | L | M | LM | benign            |
| rs608433 | NP_031371 | V | I | VI | benign            |
| rs608620 | NP_004707 | L | V | LV | benign            |
| rs608634 | NP_689647 | P | T | PT | possibly damaging |
| rs609290 | NP_076433 | V | I | VI | benign            |
| rs609443 | NP_068599 | Q | P | QP | benign            |
| rs609521 | NP_056417 | P | R | PR | benign            |
| rs609563 | XP_370958 | S | P | SP | benign            |
| rs609636 | NP_076433 | D | N | DN | benign            |
| rs609828 | NP_115897 | C | S | CS | benign            |
| rs610211 | NP_008969 | V | G | VG | possibly damaging |
| rs610913 | NP_612450 | P | H | PH | probably damaging |
| rs612593 | NP_057593 | V | I | VI | benign            |
| rs612969 | NP_005413 | G | R | GR | probably damaging |
| rs613240 | NP_056952 | P | R | PR | benign            |
| rs613240 | NP_055326 | P | R | PR | benign            |
| rs613240 | NP_055034 | R | P | RP | benign            |
| rs613875 | NP_065091 | F | L | FL | benign            |
| rs613907 | NP_061753 | L | M | LM | benign            |
| rs614076 | XP_171040 | G | R | GR | probably damaging |
| rs614447 | XP_290941 | S | F | SF | benign            |
| rs614486 | XP_371248 | D | E | DE | benign            |
| rs614649 | XP_212238 | A | T | AT | benign            |
| rs614649 | XP_212241 | T | A | TA | benign            |
| rs614696 | XP_212241 | K | M | KM | benign            |
| rs614696 | XP_212238 | M | K | MK | benign            |
| rs614720 | NP_006380 | T | N | TN | benign            |
| rs615151 | NP_775901 | W | G | WG | probably damaging |
| rs615436 | NP_694882 | W | R | WR | probably damaging |



|          |           |   |   |    |                   |
|----------|-----------|---|---|----|-------------------|
| rs615436 | NP_079496 | W | R | WR | probably damaging |
| rs615605 | XP_372719 | I | K | IK | probably damaging |
| rs615714 | XP_372719 | Q | E | QE | benign            |
| rs615942 | NP_079509 | Y | S | YS | benign            |
| rs616114 | NP_005916 | L | P | LP | possibly damaging |
| rs616235 | NP_005233 | N | S | NS | benign            |
| rs616338 | NP_057512 | S | F | SF | benign            |
| rs616634 | NP_004188 | S | G | SG | benign            |
| rs616634 | NP_115830 | S | G | SG | benign            |
| rs617368 | NP_149033 | R | T | RT | benign            |
| rs617368 | NP_036222 | R | T | RT | possibly damaging |
| rs617401 | NP_149033 | M | V | MV | benign            |
| rs617401 | NP_036222 | M | V | MV | possibly damaging |
| rs617405 | NP_149033 | Q | H | QH | benign            |
| rs617405 | NP_036222 | Q | H | QH | possibly damaging |
| rs617422 | NP_149033 | Q | H | QH | benign            |
| rs617422 | NP_036222 | Q | H | QH | possibly damaging |
| rs617863 | NP_149033 | V | L | VL | benign            |
| rs617863 | NP_036222 | V | L | VL | benign            |
| rs618066 | NP_008842 | K | M | KM | probably damaging |
| rs618096 | NP_061758 | R | Q | RQ | benign            |
| rs618506 | NP_061758 | S | R | SR | probably damaging |
| rs618835 | NP_002246 | Y | C | YC | benign            |
| rs618838 | NP_001095 | R | C | RC | probably damaging |
| rs619006 | XP_370844 | K | T | KT | benign            |
| rs619203 | NP_002935 | S | C | SC | probably damaging |
| rs619381 | NP_076408 | M | I | MI | possibly damaging |
| rs620101 | XP_376610 | S | G | SG | benign            |
| rs620207 | NP_006855 | L | W | LW | possibly damaging |
| rs620234 | NP_149033 | S | T | ST | benign            |
| rs620234 | NP_036222 | S | T | ST | benign            |
| rs620443 | NP_941966 | N | D | ND | benign            |
| rs620552 | XP_041018 | S | P | SP | benign            |
| rs620685 | NP_003400 | F | S | FS | possibly damaging |
| rs621075 | NP_149033 | Q | H | QH | benign            |
| rs621075 | NP_036222 | Q | H | QH | possibly damaging |
| rs621383 | NP_078904 | V | I | VI | benign            |
| rs621476 | XP_497792 | N | S | NS | benign            |
| rs621679 | NP_002330 | A | T | AT | benign            |
| rs622082 | NP_002171 | T | A | TA | benign            |
| rs622288 | NP_060586 | T | I | TI | possibly damaging |
| rs622397 | NP_000675 | K | R | KR | benign            |
| rs622756 | NP_112597 | D | Y | DY | benign            |
| rs623053 | NP_060417 | I | T | IT | possibly damaging |
| rs623447 | XP_372118 | D | E | DE | benign            |
| rs623558 | NP_060417 | R | H | RH | benign            |

|          |           |   |   |    |                   |
|----------|-----------|---|---|----|-------------------|
| rs625372 | NP_075556 | K | R | KR | benign            |
| rs626560 | NP_835225 | A | T | AT | benign            |
| rs626578 | XP_039627 | N | S | NS | benign            |
| rs626992 | NP_478126 | L | V | LV | benign            |
| rs627441 | NP_001922 | V | A | VA | benign            |
| rs627530 | NP_443134 | F | S | FS | benign            |
| rs627928 | NP_066956 | D | E | DE | benign            |
| rs628031 | NP_694857 | M | V | MV | benign            |
| rs628031 | NP_003048 | M | V | MV | benign            |
| rs628105 | XP_212241 | G | E | GE | possibly damaging |
| rs628125 | XP_212241 | P | L | PL | probably damaging |
| rs628524 | XP_497294 | S | N | SN | benign            |
| rs628525 | NP_001399 | R | Q | RQ | benign            |
| rs629001 | XP_291485 | D | N | DN | benign            |
| rs629002 | XP_212241 | S | G | SG | benign            |
| rs629311 | NP_003035 | P | S | PS | benign            |
| rs629709 | XP_496272 | T | M | TM | probably damaging |
| rs629849 | NP_000867 | G | R | GR | possibly damaging |
| rs629976 | NP_742151 | R | H | RH | benign            |
| rs630079 | NP_003725 | H | R | HR | benign            |
| rs630162 | NP_114065 | T | A | TA | benign            |
| rs630162 | NP_061724 | T | A | TA | benign            |
| rs631357 | NP_065867 | E | D | ED | benign            |
| rs632729 | NP_002262 | E | K | EK | benign            |
| rs633422 | XP_113962 | K | N | KN | benign            |
| rs633500 | NP_055754 | S | P | SP | benign            |
| rs633557 | NP_115720 | P | L | PL | benign            |
| rs633561 | NP_115720 | R | Q | RQ | benign            |
| rs634222 | NP_006660 | L | F | LF | benign            |
| rs634254 | XP_498425 | G | S | GS | benign            |
| rs634361 | XP_166777 | T | A | TA | benign            |
| rs634501 | NP_002397 | P | L | PL | possibly damaging |
| rs634710 | NP_002068 | T | K | TK | benign            |
| rs635025 | XP_166256 | G | S | GS | benign            |
| rs635311 | NP_005061 | A | D | AD | benign            |
| rs635311 | NP_963868 | D | A | DA | benign            |
| rs635356 | XP_372118 | P | T | PT | possibly damaging |
| rs635356 | NP_997299 | P | T | PT | possibly damaging |
| rs636604 | NP_998765 | G | V | GV | benign            |
| rs636926 | NP_775761 | N | K | NK | benign            |
| rs637186 | NP_055022 | R | H | RH | benign            |
| rs637435 | NP_036219 | D | N | DN | benign            |
| rs637450 | NP_775761 | R | G | RG | benign            |
| rs637790 | NP_995324 | L | V | LV | benign            |
| rs638043 | NP_000414 | G | D | GD | benign            |
| rs638333 | NP_775761 | L | F | LF | benign            |

|          |           |   |   |    |                   |
|----------|-----------|---|---|----|-------------------|
| rs638524 | NP_065387 | A | V | AV | benign            |
| rs638744 | NP_036234 | L | V | LV | benign            |
| rs640132 | NP_055434 | E | G | EG | probably damaging |
| rs640192 | XP_292184 | N | S | NS | benign            |
| rs640343 | NP_066011 | A | P | AP | benign            |
| rs641081 | NP_003968 | K | Q | KQ | benign            |
| rs641153 | NP_001701 | Q | R | QR | benign            |
| rs641252 | NP_000042 | S | R | SR | benign            |
| rs641320 | NP_060617 | A | T | AT | benign            |
| rs641393 | NP_996810 | T | M | TM | benign            |
| rs641393 | NP_996811 | T | M | TM | benign            |
| rs641488 | XP_212241 | K | R | KR | benign            |
| rs641488 | XP_212238 | R | K | RK | benign            |
| rs641606 | NP_009215 | V | A | VA | benign            |
| rs641615 | NP_000415 | D | E | DE | benign            |
| rs641667 | XP_034717 | I | T | IT | benign            |
| rs641738 | NP_653287 | G | E | GE | benign            |
| rs642025 | XP_034717 | Y | F | YF | benign            |
| rs642372 | XP_372046 | T | A | TA | benign            |
| rs642381 | XP_212241 | E | G | EG | possibly damaging |
| rs643050 | NP_068813 | S | I | SI | possibly damaging |
| rs643232 | NP_996665 | N | K | NK | benign            |
| rs643347 | NP_037421 | V | I | VI | benign            |
| rs643423 | NP_733840 | P | S | PS | benign            |
| rs643423 | NP_078894 | P | S | PS | possibly damaging |
| rs643788 | NP_976061 | I | V | IV | benign            |
| rs643861 | NP_037421 | V | M | VM | benign            |
| rs644564 | NP_835471 | Y | H | YH | possibly damaging |
| rs644799 | NP_055494 | R | G | RG | possibly damaging |
| rs644827 | NP_116183 | V | M | VM | benign            |
| rs644827 | NP_079533 | V | M | VM | benign            |
| rs645556 | NP_056518 | L | F | LF | benign            |
| rs645625 | NP_056518 | R | Q | RQ | benign            |
| rs645627 | NP_056518 | V | I | VI | benign            |
| rs646509 | NP_056092 | I | L | IL | benign            |
| rs646617 | NP_722449 | D | E | DE | benign            |
| rs646617 | NP_722451 | D | E | DE | benign            |
| rs646805 | NP_002507 | N | Y | NY | possibly damaging |
| rs647179 | NP_002507 | I | F | IF | benign            |
| rs647224 | NP_115643 | W | C | WC | probably damaging |
| rs648802 | NP_071404 | P | R | PR | probably damaging |
| rs649224 | NP_002387 | G | E | GE | benign            |
| rs652397 | NP_004846 | S | G | SG | benign            |
| rs652423 | NP_005546 | S | N | SN | benign            |
| rs652633 | NP_942093 | L | Q | LQ | possibly damaging |
| rs652641 | NP_037421 | G | R | GR | possibly damaging |

|          |           |   |   |    |                   |
|----------|-----------|---|---|----|-------------------|
| rs652641 | XP_498425 | W | R | WR | probably damaging |
| rs652741 | NP_037421 | P | S | PS | benign            |
| rs652741 | XP_498425 | S | T | ST | benign            |
| rs652785 | NP_000553 | Q | K | QK | possibly damaging |
| rs653057 | XP_372441 | V | I | VI | benign            |
| rs653635 | NP_001399 | Y | H | YH | benign            |
| rs653737 | XP_375853 | Y | C | YC | probably damaging |
| rs653901 | NP_001199 | R | W | RW | benign            |
| rs654686 | NP_006728 | A | T | AT | benign            |
| rs654983 | XP_497999 | T | I | TI | possibly damaging |
| rs655260 | NP_443173 | Y | N | YN | possibly damaging |
| rs655415 | XP_293366 | Y | S | YS | possibly damaging |
| rs655444 | XP_497999 | R | K | RK | benign            |
| rs656195 | XP_290517 | P | R | PR | possibly damaging |
| rs656870 | XP_034717 | C | R | CR | possibly damaging |
| rs657363 | NP_006461 | S | R | SR | benign            |
| rs657541 | NP_005122 | N | H | NH | benign            |
| rs657672 | XP_372668 | V | M | VM | benign            |
| rs657723 | XP_372668 | N | S | NS | benign            |
| rs658149 | XP_496386 | M | K | MK | probably damaging |
| rs658160 | XP_496386 | R | H | RH | possibly damaging |
| rs658635 | XP_034717 | F | S | FS | benign            |
| rs659040 | NP_689647 | H | Y | HY | benign            |
| rs659243 | NP_612149 | S | N | SN | benign            |
| rs659243 | NP_000042 | S | N | SN | benign            |
| rs659289 | XP_496139 | V | A | VA | benign            |
| rs659436 | NP_778238 | P | L | PL | benign            |
| rs659473 | XP_377265 | T | A | TA | benign            |
| rs659543 | NP_065826 | T | P | TP | benign            |
| rs660118 | NP_005137 | G | A | GA | benign            |
| rs660339 | NP_003346 | A | V | AV | benign            |
| rs660405 | NP_037421 | L | H | LH | benign            |
| rs660405 | XP_498425 | R | L | RL | benign            |
| rs660539 | NP_149044 | E | K | EK | benign            |
| rs661301 | XP_035371 | S | P | SP | benign            |
| rs662386 | NP_703144 | V | A | VA | possibly damaging |
| rs662471 | NP_005550 | M | V | MV | possibly damaging |
| rs662515 | NP_075563 | A | P | AP | benign            |
| rs662515 | NP_613074 | P | A | PA | benign            |
| rs663048 | NP_066938 | M | I | MI | possibly damaging |
| rs663227 | NP_061847 | Y | H | YH | possibly damaging |
| rs663606 | NP_061847 | M | T | MT | benign            |
| rs663824 | NP_689711 | N | D | ND | benign            |
| rs664031 | NP_061847 | C | R | CR | probably damaging |
| rs664226 | NP_001658 | A | V | AV | benign            |
| rs664788 | XP_499223 | D | G | DG | possibly damaging |

|          |           |   |   |    |                   |
|----------|-----------|---|---|----|-------------------|
| rs665230 | NP_006061 | I | S | IS | benign            |
| rs665268 | NP_937847 | Q | R | QR | benign            |
| rs665268 | NP_937848 | Q | R | QR | benign            |
| rs665268 | NP_733752 | Q | R | QR | benign            |
| rs665278 | NP_076984 | N | S | NS | benign            |
| rs665470 | NP_258259 | E | K | EK | benign            |
| rs665522 | NP_258259 | V | I | VI | benign            |
| rs665648 | NP_116743 | G | S | GS | benign            |
| rs665653 | NP_653266 | E | G | EG | probably damaging |
| rs666590 | NP_055033 | H | R | HR | benign            |
| rs667782 | NP_659451 | C | R | CR | probably damaging |
| rs667817 | NP_002507 | T | S | TS | benign            |
| rs667843 | NP_002507 | D | V | DV | probably damaging |
| rs668182 | XP_497472 | S | T | ST | benign            |
| rs668313 | NP_778253 | R | Q | RQ | benign            |
| rs668556 | NP_149033 | S | T | ST | benign            |
| rs668556 | NP_036222 | S | T | ST | benign            |
| rs669694 | NP_079504 | Q | E | QE | benign            |
| rs669884 | NP_000370 | T | K | TK | probably damaging |
| rs670519 | XP_497335 | V | A | VA | benign            |
| rs670573 | NP_114403 | W | R | WR | probably damaging |
| rs670741 | NP_778223 | D | E | DE | benign            |
| rs670945 | XP_497335 | P | T | PT | possibly damaging |
| rs671138 | NP_073588 | T | N | TN | benign            |
| rs671287 | XP_376965 | Q | R | QR | benign            |
| rs671329 | NP_647537 | R | S | RS | possibly damaging |
| rs671871 | NP_005550 | I | T | IT | benign            |
| rs671942 | XP_113962 | K | Q | KQ | benign            |
| rs672346 | NP_001704 | F | L | FL | benign            |
| rs672347 | NP_001704 | F | C | FC | probably damaging |
| rs672762 | NP_065091 | N | S | NS | benign            |
| rs672924 | NP_060417 | V | L | VL | benign            |
| rs673305 | XP_372891 | H | Q | HQ | benign            |
| rs673918 | NP_002994 | P | T | PT | benign            |
| rs673951 | NP_443134 | I | V | IV | benign            |
| rs675815 | NP_005829 | S | N | SN | benign            |
| rs675815 | NP_964011 | S | N | SN | benign            |
| rs676210 | NP_000375 | P | L | PL | probably damaging |
| rs676314 | NP_004842 | I | T | IT | benign            |
| rs676404 | NP_808219 | L | V | LV | benign            |
| rs676419 | NP_055159 | A | T | AT | benign            |
| rs676770 | NP_808219 | Q | R | QR | benign            |
| rs676814 | NP_115668 | S | P | SP | benign            |
| rs676823 | NP_808219 | F | L | FL | benign            |
| rs676913 | NP_997281 | I | T | IT | probably damaging |
| rs677220 | NP_115668 | T | A | TA | benign            |

|          |           |   |   |    |                   |
|----------|-----------|---|---|----|-------------------|
| rs677688 | NP_060909 | V | L | VL | benign            |
| rs678084 | NP_079184 | A | S | AS | benign            |
| rs678238 | NP_065826 | V | I | VI | benign            |
| rs678560 | NP_060417 | M | V | MV | possibly damaging |
| rs678876 | NP_006855 | R | Q | RQ | benign            |
| rs678892 | NP_004846 | L | W | LW | possibly damaging |
| rs679361 | XP_497714 | G | S | GS | benign            |
| rs679620 | NP_002413 | K | E | KE | benign            |
| rs679899 | NP_000375 | A | V | AV | benign            |
| rs680055 | NP_073731 | P | A | PA | probably damaging |
| rs680055 | NP_476437 | P | A | PA | probably damaging |
| rs680055 | NP_476436 | P | A | PA | probably damaging |
| rs680728 | NP_149033 | S | C | SC | benign            |
| rs680728 | NP_036222 | S | C | SC | benign            |
| rs680775 | XP_041018 | C | R | CR | benign            |
| rs680891 | XP_498425 | L | P | LP | benign            |
| rs680891 | NP_037421 | P | L | PL | benign            |
| rs681518 | NP_000042 | Q | P | QP | possibly damaging |
| rs681518 | NP_612149 | Q | P | QP | probably damaging |
| rs681529 | XP_371630 | G | R | GR | possibly damaging |
| rs681982 | XP_374949 | L | F | LF | possibly damaging |
| rs682327 | NP_001646 | F | L | FL | possibly damaging |
| rs682351 | NP_149033 | K | R | KR | benign            |
| rs682351 | NP_036222 | K | R | KR | benign            |
| rs682632 | NP_000450 | P | Q | PQ | possibly damaging |
| rs683369 | NP_694857 | L | F | LF | benign            |
| rs683369 | NP_003048 | L | F | LF | benign            |
| rs683733 | NP_005550 | G | V | GV | possibly damaging |
| rs684245 | NP_068599 | K | Q | KQ | benign            |
| rs684399 | XP_047550 | S | P | SP | benign            |
| rs684535 | NP_058648 | I | N | IN | benign            |
| rs684900 | XP_047550 | T | A | TA | benign            |
| rs685082 | NP_006831 | H | N | HN | benign            |
| rs685497 | NP_006831 | A | T | AT | benign            |
| rs685523 | NP_620595 | A | V | AV | benign            |
| rs685523 | NP_620594 | A | V | AV | benign            |
| rs685523 | NP_620596 | V | A | VA | benign            |
| rs685688 | XP_047554 | E | D | ED | benign            |
| rs685688 | XP_047550 | E | D | ED | benign            |
| rs685870 | NP_115627 | W | R | WR | probably damaging |
| rs685967 | NP_955360 | T | A | TA | benign            |
| rs686163 | XP_497696 | R | G | RG | probably damaging |
| rs686364 | NP_955360 | S | P | SP | probably damaging |
| rs687485 | NP_055327 | K | T | KT | possibly damaging |
| rs687885 | NP_055327 | L | V | LV | benign            |
| rs688534 | XP_496291 | S | T | ST | possibly damaging |

|          |           |   |   |    |                   |
|----------|-----------|---|---|----|-------------------|
| rs688906 | XP_370652 | K | R | KR | benign            |
| rs689647 | NP_005648 | G | S | GS | benign            |
| rs689706 | NP_942154 | V | A | VA | benign            |
| rs689759 | XP_496150 | P | L | PL | possibly damaging |
| rs689759 | XP_496152 | P | L | PL | possibly damaging |
| rs689942 | NP_942154 | K | N | KN | benign            |
| rs690346 | NP_877435 | V | M | VM | benign            |
| rs690514 | NP_004101 | Q | R | QR | benign            |
| rs690514 | NP_077728 | Q | R | QR | benign            |
| rs692190 | NP_004658 | A | T | AT | benign            |
| rs692243 | NP_059127 | P | A | PA | possibly damaging |
| rs693598 | NP_005924 | Q | P | QP | possibly damaging |
| rs693777 | NP_006304 | T | P | TP | possibly damaging |
| rs694328 | NP_000181 | Q | H | QH | possibly damaging |
| rs695633 | NP_115997 | I | V | IV | benign            |
| rs696097 | XP_057040 | H | R | HR | benign            |
| rs696217 | NP_057446 | L | M | LM | benign            |
| rs696698 | XP_371259 | R | H | RH | benign            |
| rs696708 | NP_004527 | L | W | LW | possibly damaging |
| rs696723 | NP_009054 | G | R | GR | probably damaging |
| rs696763 | NP_001728 | D | Y | DY | probably damaging |
| rs697636 | NP_872414 | F | Y | FY | benign            |
| rs697742 | NP_005505 | R | Q | RQ | benign            |
| rs698025 | NP_057735 | G | S | GS | benign            |
| rs698064 | XP_375308 | E | K | EK | benign            |
| rs698577 | NP_005786 | Y | N | YN | possibly damaging |
| rs698673 | NP_689829 | R | K | RK | benign            |
| rs698761 | NP_000332 | I | M | IM | benign            |
| rs699512 | NP_000703 | A | T | AT | benign            |
| rs699596 | XP_056681 | G | R | GR | probably damaging |
| rs699597 | XP_056681 | A | D | AD | possibly damaging |
| rs699638 | NP_689653 | S | A | SA | benign            |
| rs699664 | NP_000812 | R | Q | RQ | benign            |
| rs699738 | NP_001758 | Q | H | QH | probably damaging |
| rs700233 | NP_001728 | R | W | RW | possibly damaging |
| rs700241 | NP_001334 | T | I | TI | benign            |
| rs700323 | NP_002760 | E | K | EK | benign            |
| rs700519 | NP_000094 | R | S | RS | benign            |
| rs700519 | NP_112503 | R | S | RS | benign            |
| rs700785 | NP_064509 | E | K | EK | benign            |
| rs700866 | XP_496581 | A | T | AT | benign            |
| rs701753 | NP_000087 | D | E | DE | benign            |
| rs701828 | NP_072049 | A | T | AT | benign            |
| rs701829 | NP_002115 | V | M | VM | benign            |
| rs701830 | NP_072049 | Q | H | QH | benign            |
| rs701865 | NP_006195 | S | T | ST | benign            |

|          |           |   |   |    |                   |
|----------|-----------|---|---|----|-------------------|
| rs702017 | NP_006587 | R | I | RI | possibly damaging |
| rs702017 | NP_955452 | R | I | RI | possibly damaging |
| rs702372 | NP_563614 | C | Y | CY | probably damaging |
| rs702386 | NP_061753 | R | S | RS | benign            |
| rs702689 | XP_042066 | D | N | DN | benign            |
| rs703903 | NP_002541 | Q | R | QR | benign            |
| rs704326 | NP_000712 | A | T | AT | benign            |
| rs704793 | NP_056477 | R | H | RH | benign            |
| rs704959 | NP_665698 | K | R | KR | benign            |
| rs705279 | NP_006483 | R | K | RK | benign            |
| rs705754 | XP_497729 | E | A | EA | benign            |
| rs706107 | NP_055286 | V | I | VI | benign            |
| rs706479 | NP_000553 | T | I | TI | benign            |
| rs706761 | NP_056507 | I | T | IT | benign            |
| rs706764 | XP_211460 | A | T | AT | benign            |
| rs706846 | NP_076427 | P | S | PS | possibly damaging |
| rs706956 | XP_498128 | R | S | RS | possibly damaging |
| rs707157 | NP_003109 | D | N | DN | possibly damaging |
| rs707394 | XP_371925 | K | N | KN | benign            |
| rs707394 | NP_775808 | K | N | KN | benign            |
| rs707554 | XP_371401 | V | A | VA | benign            |
| rs707555 | NP_002582 | L | V | LV | benign            |
| rs707744 | NP_008836 | E | Q | EQ | benign            |
| rs707745 | NP_008836 | T | P | TP | benign            |
| rs707746 | NP_112536 | Q | H | QH | benign            |
| rs707748 | NP_008836 | A | V | AV | benign            |
| rs707749 | NP_008836 | R | Q | RQ | benign            |
| rs707749 | NP_002774 | R | Q | RQ | benign            |
| rs707908 | NP_002118 | E | K | EK | benign            |
| rs707909 | NP_002107 | V | M | VM | benign            |
| rs707910 | NP_002107 | R | K | RK | benign            |
| rs707912 | NP_005505 | E | A | EA | benign            |
| rs707936 | NP_079534 | Y | H | YH | benign            |
| rs707949 | NP_002113 | F | L | FL | possibly damaging |
| rs707950 | NP_002113 | Q | H | QH | benign            |
| rs707952 | NP_002113 | T | I | TI | benign            |
| rs707955 | NP_002116 | D | H | DH | benign            |
| rs707956 | NP_072049 | F | I | FI | benign            |
| rs707957 | NP_072049 | F | Y | FY | benign            |
| rs707958 | NP_002112 | A | D | AD | benign            |
| rs707959 | NP_072049 | N | T | NT | benign            |
| rs707962 | NP_002113 | I | S | IS | benign            |
| rs707963 | NP_002113 | D | E | DE | benign            |
| rs708567 | NP_703190 | S | L | SL | benign            |
| rs708567 | NP_703191 | S | L | SL | benign            |
| rs708567 | NP_703192 | S | L | SL | benign            |



|          |           |   |   |    |                   |
|----------|-----------|---|---|----|-------------------|
| rs708567 | NP_116121 | S | L | SL | benign            |
| rs708776 | NP_002212 | Q | P | QP | benign            |
| rs709012 | NP_075556 | H | P | HP | benign            |
| rs709035 | NP_060946 | D | N | DN | benign            |
| rs709036 | NP_060946 | A | V | AV | benign            |
| rs709037 | NP_060946 | G | S | GS | benign            |
| rs709055 | NP_005505 | D | N | DN | benign            |
| rs709060 | XP_376720 | S | P | SP | probably damaging |
| rs709061 | XP_376720 | Q | R | QR | benign            |
| rs709065 | XP_374581 | D | E | DE | benign            |
| rs709210 | NP_003764 | S | A | SA | benign            |
| rs709210 | NP_149348 | S | A | SA | benign            |
| rs709564 | NP_115989 | R | Q | RQ | benign            |
| rs709682 | NP_055862 | S | N | SN | benign            |
| rs709683 | NP_055862 | S | T | ST | benign            |
| rs709783 | NP_660155 | R | H | RH | benign            |
| rs709786 | XP_086186 | V | I | VI | benign            |
| rs709932 | NP_000286 | R | H | RH | benign            |
| rs710174 | NP_036311 | I | M | IM | benign            |
| rs710187 | NP_055106 | R | C | RC | probably damaging |
| rs710193 | NP_003923 | M | I | MI | benign            |
| rs711177 | NP_055928 | E | Q | EQ | benign            |
| rs711306 | NP_009086 | R | S | RS | benign            |
| rs711316 | NP_067653 | P | H | PH | probably damaging |
| rs711872 | XP_372191 | Y | N | YN | possibly damaging |
| rs711873 | XP_372191 | K | M | KM | possibly damaging |
| rs711875 | XP_372191 | Q | E | QE | benign            |
| rs711876 | XP_372191 | R | C | RC | possibly damaging |
| rs711877 | XP_372191 | K | E | KE | benign            |
| rs712021 | NP_954630 | G | S | GS | benign            |
| rs712021 | NP_110381 | S | G | SG | possibly damaging |
| rs712270 | NP_057323 | Y | F | YF | benign            |
| rs712665 | NP_005074 | S | G | SG | possibly damaging |
| rs712701 | NP_006184 | P | H | PH | probably damaging |
| rs712896 | NP_055654 | Q | K | QK | benign            |
| rs712965 | NP_073210 | A | V | AV | benign            |
| rs713031 | NP_005505 | S | T | ST | benign            |
| rs713598 | NP_789787 | A | P | AP | possibly damaging |
| rs713998 | NP_690054 | E | G | EG | benign            |
| rs713998 | NP_690055 | E | G | EG | benign            |
| rs713998 | NP_690056 | E | G | EG | benign            |
| rs713998 | NP_071364 | E | G | EG | benign            |
| rs714106 | NP_291021 | T | N | TN | benign            |
| rs714181 | NP_115820 | L | P | LP | probably damaging |
| rs714368 | NP_149116 | H | R | HR | possibly damaging |
| rs714774 | NP_055680 | E | Q | EQ | benign            |

|          |           |   |   |    |                   |
|----------|-----------|---|---|----|-------------------|
| rs714923 | NP_005898 | K | E | KE | possibly damaging |
| rs715146 | NP_689853 | R | H | RH | benign            |
| rs715747 | NP_060899 | I | M | IM | benign            |
| rs715748 | NP_060899 | G | S | GS | benign            |
| rs716861 | XP_497659 | P | L | PL | benign            |
| rs719705 | NP_004571 | T | P | TP | probably damaging |
| rs719705 | NP_899057 | T | P | TP | probably damaging |
| rs719705 | NP_899058 | T | P | TP | probably damaging |
| rs719705 | NP_899059 | T | P | TP | probably damaging |
| rs721005 | NP_113664 | T | S | TS | benign            |
| rs721710 | XP_058513 | V | E | VE | benign            |
| rs721957 | XP_496218 | C | Y | CY | probably damaging |
| rs721958 | XP_496218 | E | D | ED | possibly damaging |
| rs722896 | NP_775806 | R | H | RH | benign            |
| rs723044 | NP_689596 | S | P | SP | benign            |
| rs723077 | NP_060338 | L | M | LM | benign            |
| rs723685 | NP_149116 | V | A | VA | benign            |
| rs723874 | NP_066300 | L | V | LV | benign            |
| rs724558 | NP_005015 | I | T | IT | benign            |
| rs724665 | NP_061331 | T | I | TI | possibly damaging |
| rs725143 | NP_067078 | E | K | EK | possibly damaging |
| rs725185 | NP_003594 | A | V | AV | benign            |
| rs725185 | NP_066547 | A | V | AV | benign            |
| rs725847 | NP_112196 | E | Q | EQ | benign            |
| rs726070 | NP_056472 | D | N | DN | benign            |
| rs726070 | NP_775099 | D | N | DN | benign            |
| rs726684 | NP_054723 | L | R | LR | possibly damaging |
| rs726684 | NP_114477 | L | R | LR | possibly damaging |
| rs726817 | NP_660289 | R | H | RH | benign            |
| rs727162 | NP_997056 | S | R | SR | possibly damaging |
| rs727162 | NP_997055 | S | R | SR | possibly damaging |
| rs727913 | XP_088491 | T | A | TA | probably damaging |
| rs728619 | NP_000170 | Y | S | YS | probably damaging |
| rs729184 | XP_040910 | Q | R | QR | benign            |
| rs729421 | NP_878256 | T | A | TA | benign            |
| rs729630 | NP_597725 | S | F | SF | benign            |
| rs729864 | XP_085634 | E | Q | EQ | benign            |
| rs729940 | NP_001266 | R | W | RW | probably damaging |
| rs730152 | NP_000205 | S | R | SR | benign            |
| rs730319 | NP_001447 | V | A | VA | possibly damaging |
| rs730373 | NP_113632 | V | G | VG | possibly damaging |
| rs730469 | NP_667338 | T | A | TA | benign            |
| rs730882 | NP_689825 | R | C | RC | possibly damaging |
| rs731170 | NP_006838 | G | D | GD | benign            |
| rs731506 | NP_742053 | V | G | VG | probably damaging |
| rs731506 | NP_000229 | V | G | VG | probably damaging |

|          |           |   |   |    |                   |
|----------|-----------|---|---|----|-------------------|
| rs732609 | NP_000538 | T | P | TP | benign            |
| rs732609 | NP_783650 | T | P | TP | benign            |
| rs732609 | NP_783651 | T | P | TP | benign            |
| rs732609 | NP_783652 | T | P | TP | benign            |
| rs732609 | NP_783653 | T | P | TP | benign            |
| rs732774 | NP_000044 | K | R | KR | benign            |
| rs733574 | NP_036343 | W | G | WG | possibly damaging |
| rs733731 | NP_443122 | R | Q | RQ | benign            |
| rs733743 | NP_077819 | R | T | RT | possibly damaging |
| rs734312 | NP_005996 | R | H | RH | possibly damaging |
| rs734411 | NP_149363 | R | H | RH | benign            |
| rs734784 | NP_002242 | I | V | IV | benign            |
| rs734824 | NP_877417 | G | W | GW | possibly damaging |
| rs734852 | NP_005272 | R | H | RH | benign            |
| rs735295 | NP_115734 | M | T | MT | benign            |
| rs735482 | NP_036231 | K | T | KT | benign            |
| rs735623 | NP_002499 | V | G | VG | probably damaging |
| rs735911 | NP_892018 | S | N | SN | benign            |
| rs735943 | NP_569082 | H | R | HR | benign            |
| rs735943 | NP_003677 | H | R | HR | probably damaging |
| rs736118 | NP_071764 | M | I | MI | benign            |
| rs736776 | XP_497598 | T | I | TI | benign            |
| rs737111 | NP_008966 | V | G | VG | benign            |
| rs737700 | NP_631909 | R | Q | RQ | benign            |
| rs737976 | NP_003669 | I | V | IV | benign            |
| rs738409 | NP_079501 | I | M | IM | benign            |
| rs738786 | NP_705843 | Q | R | QR | benign            |
| rs738826 | XP_496521 | R | C | RC | possibly damaging |
| rs739231 | NP_620169 | W | R | WR | probably damaging |
| rs739320 | NP_061986 | L | P | LP | probably damaging |
| rs739869 | NP_775756 | S | R | SR | benign            |
| rs739999 | NP_899180 | M | T | MT | possibly damaging |
| rs740109 | XP_376720 | R | W | RW | probably damaging |
| rs740842 | NP_060643 | T | A | TA | benign            |
| rs741006 | NP_114034 | R | K | RK | benign            |
| rs741006 | NP_002365 | R | K | RK | benign            |
| rs741064 | NP_060957 | T | A | TA | benign            |
| rs741326 | NP_056532 | A | V | AV | benign            |
| rs741446 | XP_375594 | P | L | PL | benign            |
| rs741842 | XP_370765 | A | T | AT | benign            |
| rs742491 | NP_775832 | P | R | PR | probably damaging |
| rs742493 | NP_775832 | G | R | GR | possibly damaging |
| rs742710 | NP_001810 | P | L | PL | probably damaging |
| rs742711 | NP_001810 | R | H | RH | benign            |
| rs742843 | NP_006383 | T | I | TI | benign            |
| rs743269 | NP_003180 | G | R | GR | possibly damaging |

|          |           |   |   |    |                   |
|----------|-----------|---|---|----|-------------------|
| rs743346 | NP_006022 | R | H | RH | benign            |
| rs743488 | NP_003298 | R | Q | RQ | benign            |
| rs743515 | NP_003926 | S | P | SP | benign            |
| rs743580 | NP_150253 | G | S | GS | benign            |
| rs743580 | NP_150242 | S | G | SG | benign            |
| rs743581 | NP_150253 | V | G | VG | benign            |
| rs743581 | NP_150242 | G | V | GV | possibly damaging |
| rs743582 | NP_150253 | A | P | AP | benign            |
| rs743582 | NP_150242 | A | P | AP | benign            |
| rs743616 | NP_000478 | T | S | TS | benign            |
| rs743855 | NP_006021 | E | K | EK | benign            |
| rs743920 | NP_597712 | A | G | AG | benign            |
| rs743923 | NP_443193 | V | M | VM | benign            |
| rs744025 | XP_496351 | R | Q | RQ | benign            |
| rs744050 | NP_938083 | S | R | SR | probably damaging |
| rs744087 | NP_115542 | E | A | EA | benign            |
| rs744087 | NP_569055 | E | A | EA | benign            |
| rs744224 | NP_839943 | R | C | RC | possibly damaging |
| rs744282 | NP_002011 | R | C | RC | benign            |
| rs744282 | NP_891555 | R | C | RC | benign            |
| rs745044 | XP_376720 | R | C | RC | probably damaging |
| rs745142 | NP_060411 | Q | H | QH | benign            |
| rs745143 | NP_060411 | F | L | FL | benign            |
| rs745191 | NP_009131 | G | V | GV | probably damaging |
| rs745191 | NP_006729 | G | V | GV | probably damaging |
| rs745211 | NP_877417 | L | M | LM | benign            |
| rs745400 | XP_029438 | R | K | RK | benign            |
| rs745835 | NP_000060 | E | V | EV | benign            |
| rs745894 | NP_079057 | C | F | CF | probably damaging |
| rs746207 | NP_003467 | A | T | AT | benign            |
| rs746316 | NP_008920 | M | V | MV | benign            |
| rs746748 | NP_056415 | A | T | AT | benign            |
| rs746924 | NP_008994 | R | G | RG | probably damaging |
| rs747300 | NP_009141 | V | I | VI | benign            |
| rs747890 | XP_370696 | E | Q | EQ | benign            |
| rs748338 | NP_079081 | V | M | VM | benign            |
| rs748358 | XP_290629 | T | M | TM | benign            |
| rs748870 | NP_006546 | V | G | VG | benign            |
| rs749071 | XP_495949 | T | I | TI | benign            |
| rs749670 | NP_055514 | G | E | GE | benign            |
| rs749902 | NP_079464 | C | Y | CY | probably damaging |
| rs751019 | NP_775267 | K | T | KT | benign            |
| rs751019 | NP_775268 | K | T | KT | benign            |
| rs751141 | NP_001970 | R | Q | RQ | probably damaging |
| rs751557 | NP_001844 | A | E | AE | benign            |
| rs751747 | NP_075383 | E | K | EK | benign            |

|          |           |   |   |    |                   |
|----------|-----------|---|---|----|-------------------|
| rs751793 | XP_291085 | P | L | PL | probably damaging |
| rs751852 | NP_003180 | A | T | AT | benign            |
| rs752329 | XP_497739 | R | Q | RQ | benign            |
| rs752331 | XP_497739 | E | K | EK | benign            |
| rs753034 | NP_065185 | V | G | VG | probably damaging |
| rs753381 | NP_002651 | I | T | IT | benign            |
| rs753381 | NP_877963 | I | T | IT | benign            |
| rs753856 | NP_002146 | D | E | DE | benign            |
| rs754093 | NP_765975 | C | G | CG | probably damaging |
| rs754093 | NP_765977 | C | G | CG | probably damaging |
| rs754093 | NP_765976 | C | G | CG | probably damaging |
| rs754382 | XP_373413 | L | S | LS | benign            |
| rs754511 | XP_371398 | F | Y | FY | benign            |
| rs754554 | NP_004394 | P | T | PT | benign            |
| rs754615 | NP_001741 | C | S | CS | benign            |
| rs754615 | NP_775083 | C | S | CS | benign            |
| rs754615 | NP_775084 | C | S | CS | benign            |
| rs754615 | NP_775085 | C | S | CS | benign            |
| rs755078 | NP_056011 | S | Y | SY | possibly damaging |
| rs755237 | NP_056308 | G | S | GS | benign            |
| rs755246 | XP_495877 | D | Y | DY | probably damaging |
| rs755708 | NP_114034 | V | F | VF | benign            |
| rs755708 | NP_002365 | V | F | VF | benign            |
| rs755793 | NP_075418 | M | T | MT | benign            |
| rs755793 | NP_075258 | M | T | MT | benign            |
| rs755793 | NP_075259 | M | T | MT | benign            |
| rs755793 | NP_075260 | M | T | MT | benign            |
| rs755793 | NP_075261 | M | T | MT | benign            |
| rs755793 | NP_075262 | M | T | MT | benign            |
| rs755793 | NP_075263 | M | T | MT | benign            |
| rs755793 | NP_075265 | M | T | MT | benign            |
| rs755793 | NP_075417 | M | T | MT | benign            |
| rs755793 | NP_075419 | M | T | MT | benign            |
| rs755793 | NP_075420 | M | T | MT | benign            |
| rs755793 | NP_075264 | M | T | MT | benign            |
| rs755793 | NP_000132 | M | T | MT | benign            |
| rs755922 | NP_000444 | V | E | VE | benign            |
| rs757081 | NP_005004 | Q | E | QE | benign            |
| rs757110 | NP_000343 | S | A | SA | benign            |
| rs757259 | NP_619645 | E | K | EK | benign            |
| rs757262 | NP_619645 | T | M | TM | benign            |
| rs757660 | NP_036561 | R | K | RK | benign            |
| rs757978 | XP_376193 | T | I | TI | possibly damaging |
| rs758037 | NP_689763 | C | R | CR | benign            |
| rs759458 | NP_003029 | V | I | VI | benign            |
| rs759575 | XP_496493 | R | Q | RQ | benign            |

|          |           |   |   |    |                   |
|----------|-----------|---|---|----|-------------------|
| rs759593 | NP_219494 | T | A | TA | benign            |
| rs759611 | NP_699165 | D | E | DE | benign            |
| rs759611 | NP_878315 | D | E | DE | benign            |
| rs759612 | NP_699165 | V | L | VL | benign            |
| rs759612 | NP_878315 | V | L | VL | benign            |
| rs760073 | NP_005689 | L | R | LR | possibly damaging |
| rs760077 | NP_002446 | T | S | TS | benign            |
| rs760077 | NP_942584 | T | S | TS | benign            |
| rs760134 | NP_002265 | A | G | AG | benign            |
| rs760134 | NP_705694 | A | G | AG | benign            |
| rs760242 | NP_001351 | G | S | GS | benign            |
| rs760357 | NP_036599 | M | V | MV | benign            |
| rs760718 | NP_079231 | F | L | FL | benign            |
| rs760998 | XP_028810 | E | K | EK | benign            |
| rs762063 | XP_290615 | V | I | VI | benign            |
| rs762563 | NP_000093 | C | W | CW | probably damaging |
| rs762566 | NP_115925 | E | Q | EQ | benign            |
| rs762585 | NP_000181 | L | M | LM | benign            |
| rs762679 | NP_877423 | L | M | LM | benign            |
| rs762679 | NP_005905 | L | M | LM | benign            |
| rs762739 | NP_647594 | E | K | EK | benign            |
| rs762739 | NP_647595 | E | K | EK | benign            |
| rs762739 | NP_647596 | E | K | EK | benign            |
| rs762739 | NP_647597 | E | K | EK | benign            |
| rs762739 | NP_647598 | E | K | EK | benign            |
| rs762739 | NP_647599 | E | K | EK | benign            |
| rs762739 | NP_647600 | E | K | EK | benign            |
| rs762739 | NP_647601 | E | K | EK | benign            |
| rs762739 | NP_004296 | E | K | EK | benign            |
| rs762739 | NP_647593 | E | K | EK | benign            |
| rs763361 | NP_006557 | G | S | GS | benign            |
| rs763414 | NP_150093 | Y | S | YS | probably damaging |
| rs763780 | NP_443104 | H | R | HR | probably damaging |
| rs763780 | NP_758846 | H | R | HR | probably damaging |
| rs764205 | NP_940908 | L | M | LM | benign            |
| rs764242 | NP_071761 | Q | H | QH | possibly damaging |
| rs764264 | NP_523239 | H | R | HR | probably damaging |
| rs764535 | NP_003259 | T | I | TI | benign            |
| rs764941 | NP_003473 | Q | H | QH | benign            |
| rs764942 | NP_003473 | Q | H | QH | benign            |
| rs765206 | NP_803491 | Y | C | YC | probably damaging |
| rs765526 | NP_619639 | D | Y | DY | probably damaging |
| rs765526 | NP_733842 | D | Y | DY | probably damaging |
| rs765593 | NP_079404 | Q | H | QH | benign            |
| rs765746 | NP_919306 | Y | C | YC | possibly damaging |
| rs766091 | XP_294077 | P | L | PL | probably damaging |

|          |           |   |   |    |                   |
|----------|-----------|---|---|----|-------------------|
| rs766173 | NP_000050 | N | H | NH | possibly damaging |
| rs766874 | NP_000483 | S | F | SF | probably damaging |
| rs766981 | NP_891847 | P | A | PA | possibly damaging |
| rs766981 | NP_061152 | P | A | PA | possibly damaging |
| rs767833 | NP_689580 | G | R | GR | benign            |
| rs767931 | NP_694943 | S | Y | SY | benign            |
| rs768436 | NP_003137 | L | V | LV | benign            |
| rs768994 | NP_114130 | M | T | MT | possibly damaging |
| rs769020 | NP_004387 | R | K | RK | benign            |
| rs769188 | NP_001500 | L | V | LV | benign            |
| rs769193 | NP_002425 | A | V | AV | benign            |
| rs769194 | NP_000836 | S | C | SC | benign            |
| rs769202 | NP_000836 | F | C | FC | benign            |
| rs769242 | NP_001228 | V | I | VI | benign            |
| rs769403 | NP_000808 | V | G | VG | possibly damaging |
| rs769414 | NP_002476 | N | S | NS | benign            |
| rs769416 | NP_002476 | Q | K | QK | benign            |
| rs769420 | NP_002476 | P | L | PL | probably damaging |
| rs769423 | NP_002539 | Q | R | QR | benign            |
| rs769427 | NP_055380 | P | S | PS | possibly damaging |
| rs769431 | NP_003545 | C | R | CR | possibly damaging |
| rs769432 | NP_002542 | L | F | LF | benign            |
| rs769432 | NP_036505 | L | F | LF | benign            |
| rs769443 | NP_001988 | V | M | VM | benign            |
| rs769452 | NP_000032 | L | P | LP | benign            |
| rs769455 | NP_000032 | R | C | RC | probably damaging |
| rs769604 | NP_940972 | A | G | AG | benign            |
| rs770087 | NP_001937 | S | A | SA | benign            |
| rs773123 | NP_001973 | S | C | SC | benign            |
| rs773902 | NP_003941 | T | A | TA | benign            |
| rs773930 | XP_211460 | Q | E | QE | benign            |
| rs774027 | NP_003911 | L | I | LI | benign            |
| rs774047 | NP_003911 | Q | R | QR | benign            |
| rs774895 | NP_597996 | V | L | VL | benign            |
| rs774896 | NP_001469 | L | V | LV | benign            |
| rs775380 | NP_061753 | E | D | ED | benign            |
| rs775881 | NP_631915 | G | E | GE | benign            |
| rs775882 | NP_631915 | V | I | VI | benign            |
| rs776755 | NP_443098 | N | S | NS | benign            |
| rs776755 | NP_640329 | N | S | NS | benign            |
| rs776755 | NP_644669 | N | S | NS | benign            |
| rs778805 | NP_000141 | P | S | PS | possibly damaging |
| rs778970 | NP_002025 | P | L | PL | probably damaging |
| rs778984 | NP_002025 | R | H | RH | benign            |
| rs778986 | NP_000140 | T | M | TM | benign            |
| rs780668 | NP_060814 | S | F | SF | possibly damaging |

|          |           |   |   |    |                   |
|----------|-----------|---|---|----|-------------------|
| rs781831 | NP_055928 | I | V | IV | benign            |
| rs781852 | NP_055928 | L | P | LP | benign            |
| rs781861 | NP_055928 | A | T | AT | benign            |
| rs782572 | NP_149100 | V | I | VI | benign            |
| rs783396 | XP_166300 | E | A | EA | benign            |
| rs783833 | NP_071403 | E | K | EK | benign            |
| rs783834 | NP_071403 | D | N | DN | possibly damaging |
| rs783835 | NP_071403 | A | V | AV | benign            |
| rs784133 | XP_496824 | L | P | LP | benign            |
| rs784625 | NP_055386 | R | H | RH | benign            |
| rs785467 | NP_003620 | N | K | NK | benign            |
| rs787795 | NP_055568 | K | R | KR | benign            |
| rs788795 | NP_067649 | A | V | AV | benign            |
| rs788908 | NP_055058 | K | R | KR | benign            |
| rs789247 | XP_371663 | V | L | VL | benign            |
| rs790287 | XP_294590 | S | R | SR | possibly damaging |
| rs793274 | NP_078956 | I | V | IV | benign            |
| rs794001 | NP_060647 | D | N | DN | benign            |
| rs794362 | XP_374460 | R | H | RH | benign            |
| rs796287 | NP_005201 | L | I | LI | benign            |
| rs798626 | XP_372233 | P | S | PS | probably damaging |
| rs798752 | NP_612394 | L | I | LI | benign            |
| rs798911 | NP_079189 | K | T | KT | benign            |
| rs799193 | NP_689568 | I | V | IV | benign            |
| rs799833 | NP_061754 | R | S | RS | probably damaging |
| rs799834 | NP_061754 | D | E | DE | benign            |
| rs799917 | NP_009230 | P | L | PL | benign            |
| rs799917 | NP_009231 | P | L | PL | benign            |
| rs799917 | NP_009232 | P | L | PL | benign            |
| rs799917 | NP_009233 | P | L | PL | benign            |
| rs799917 | NP_009228 | P | L | PL | benign            |
| rs800292 | NP_000177 | V | I | VI | benign            |
| rs801205 | XP_496889 | G | V | GV | probably damaging |
| rs801840 | NP_857597 | F | I | FI | benign            |
| rs801841 | NP_857597 | V | I | VI | benign            |
| rs803064 | NP_001904 | A | T | AT | benign            |
| rs803064 | NP_852477 | A | T | AT | benign            |
| rs805267 | NP_067044 | D | N | DN | benign            |
| rs805295 | NP_067069 | P | S | PS | benign            |
| rs805408 | NP_055429 | S | T | ST | benign            |
| rs805657 | NP_055535 | C | Y | CY | probably damaging |
| rs805697 | NP_000485 | G | R | GR | probably damaging |
| rs805697 | NP_570134 | G | R | GR | probably damaging |
| rs805698 | NP_000485 | S | G | SG | benign            |
| rs805698 | NP_570134 | S | G | SG | benign            |
| rs805708 | NP_000485 | T | M | TM | benign            |



|          |           |   |   |    |                   |
|----------|-----------|---|---|----|-------------------|
| rs805708 | NP_570134 | T | M | TM | benign            |
| rs806052 | NP_689842 | P | S | PS | benign            |
| rs807037 | NP_112191 | G | A | GA | benign            |
| rs807534 | XP_376472 | Y | C | YC | probably damaging |
| rs807757 | XP_497791 | G | R | GR | possibly damaging |
| rs808119 | NP_000207 | I | V | IV | benign            |
| rs809810 | NP_005712 | E | K | EK | possibly damaging |
| rs810205 | NP_001469 | G | R | GR | possibly damaging |
| rs811044 | NP_004512 | G | C | GC | probably damaging |
| rs811605 | XP_370727 | L | F | LF | possibly damaging |
| rs811925 | NP_001189 | D | E | DE | benign            |
| rs811925 | NP_878911 | D | E | DE | benign            |
| rs812936 | NP_000140 | W | R | WR | probably damaging |
| rs812990 | NP_116106 | S | F | SF | possibly damaging |
| rs814051 | NP_219480 | L | F | LF | benign            |
| rs814192 | NP_005712 | D | N | DN | possibly damaging |
| rs814501 | NP_079489 | G | S | GS | benign            |
| rs814501 | NP_066022 | G | S | GS | benign            |
| rs814628 | NP_004181 | T | A | TA | possibly damaging |
| rs815804 | NP_775920 | L | M | LM | benign            |
| rs815819 | XP_372118 | G | R | GR | benign            |
| rs816142 | NP_064506 | A | S | AS | benign            |
| rs817326 | NP_065764 | M | V | MV | benign            |
| rs817443 | XP_086186 | V | I | VI | benign            |
| rs817456 | XP_086186 | E | G | EG | possibly damaging |
| rs818711 | NP_060158 | Q | H | QH | benign            |
| rs818817 | NP_004794 | G | S | GS | benign            |
| rs818818 | NP_004794 | M | V | MV | benign            |
| rs819085 | NP_694996 | D | G | DG | possibly damaging |
| rs819850 | XP_371672 | S | N | SN | benign            |
| rs820085 | NP_056060 | S | L | SL | possibly damaging |
| rs820142 | XP_496245 | A | T | AT | benign            |
| rs820144 | XP_496245 | M | T | MT | benign            |
| rs820196 | NP_004250 | D | G | DG | benign            |
| rs820878 | NP_000512 | S | L | SL | possibly damaging |
| rs821314 | NP_620133 | G | R | GR | possibly damaging |
| rs821572 | NP_115545 | H | R | HR | probably damaging |
| rs821616 | NP_061132 | C | S | CS | benign            |
| rs822431 | NP_653303 | S | A | SA | benign            |
| rs822442 | XP_371320 | N | K | NK | benign            |
| rs822522 | NP_689493 | H | Q | HQ | possibly damaging |
| rs822730 | NP_852130 | R | C | RC | benign            |
| rs826058 | NP_056346 | Q | R | QR | benign            |
| rs827528 | NP_003497 | M | V | MV | possibly damaging |
| rs830844 | XP_497987 | R | I | RI | possibly damaging |
| rs830845 | XP_497987 | T | M | TM | benign            |

|          |           |   |   |    |                   |
|----------|-----------|---|---|----|-------------------|
| rs830846 | XP_497987 | A | G | AG | benign            |
| rs830848 | XP_497987 | S | C | SC | probably damaging |
| rs830850 | XP_497987 | G | A | GA | benign            |
| rs830851 | XP_497987 | T | M | TM | benign            |
| rs830852 | XP_497987 | S | C | SC | probably damaging |
| rs831510 | NP_775829 | H | Q | HQ | possibly damaging |
| rs831997 | XP_496581 | M | R | MR | benign            |
| rs831999 | XP_496581 | D | G | DG | possibly damaging |
| rs832032 | XP_116036 | K | N | KN | benign            |
| rs832156 | XP_496428 | D | E | DE | benign            |
| rs832352 | XP_496581 | W | R | WR | probably damaging |
| rs832357 | XP_496581 | Q | R | QR | benign            |
| rs832373 | XP_496581 | K | T | KT | benign            |
| rs832582 | XP_042066 | V | I | VI | benign            |
| rs833191 | XP_496391 | M | I | MI | probably damaging |
| rs833819 | NP_003473 | G | E | GE | possibly damaging |
| rs837105 | NP_036514 | L | M | LM | benign            |
| rs837550 | NP_060309 | M | I | MI | benign            |
| rs838827 | NP_003631 | R | Q | RQ | benign            |
| rs840275 | XP_290670 | C | R | CR | benign            |
| rs840276 | XP_290670 | R | P | RP | benign            |
| rs840277 | XP_290670 | L | I | LI | benign            |
| rs842274 | NP_612390 | S | A | SA | benign            |
| rs842381 | NP_055931 | P | S | PS | probably damaging |
| rs843358 | NP_003898 | V | I | VI | benign            |
| rs843704 | XP_371494 | G | S | GS | benign            |
| rs843971 | NP_443123 | G | S | GS | benign            |
| rs846179 | XP_377828 | R | H | RH | benign            |
| rs846266 | NP_000159 | A | T | AT | benign            |
| rs848208 | NP_055816 | A | V | AV | benign            |
| rs848209 | NP_055816 | L | P | LP | benign            |
| rs848210 | NP_055816 | N | D | ND | benign            |
| rs849541 | NP_003863 | K | R | KR | benign            |
| rs849541 | NP_958436 | K | R | KR | benign            |
| rs849541 | NP_957718 | K | R | KR | benign            |
| rs849541 | NP_061004 | K | R | KR | benign            |
| rs849541 | NP_957719 | K | R | KR | benign            |
| rs849541 | NP_957716 | K | R | KR | benign            |
| rs850932 | NP_003970 | S | G | SG | benign            |
| rs853678 | NP_665916 | T | S | TS | benign            |
| rs853684 | NP_665916 | K | R | KR | benign            |
| rs854560 | NP_000437 | L | M | LM | benign            |
| rs854625 | NP_116741 | I | T | IT | possibly damaging |
| rs854625 | NP_116740 | T | I | TI | possibly damaging |
| rs854777 | NP_057323 | C | R | CR | possibly damaging |
| rs855314 | NP_002624 | I | V | IV | benign            |

|          |           |   |   |    |                   |
|----------|-----------|---|---|----|-------------------|
| rs855581 | NP_002762 | A | T | AT | benign            |
| rs855677 | XP_376720 | V | M | VM | benign            |
| rs855691 | XP_376720 | S | G | SG | benign            |
| rs855692 | XP_376720 | P | Q | PQ | benign            |
| rs855693 | XP_376720 | P | A | PA | probably damaging |
| rs855791 | NP_705837 | V | A | VA | benign            |
| rs857685 | XP_060953 | N | T | NT | probably damaging |
| rs857824 | XP_060957 | R | H | RH | probably damaging |
| rs857825 | XP_060957 | Q | R | QR | possibly damaging |
| rs857826 | XP_060957 | F | L | FL | benign            |
| rs857827 | XP_060957 | I | T | IT | benign            |
| rs857828 | XP_060957 | L | F | LF | benign            |
| rs859037 | XP_497758 | G | S | GS | benign            |
| rs859098 | NP_689582 | I | V | IV | benign            |
| rs859146 | NP_060742 | E | A | EA | benign            |
| rs859208 | NP_003680 | Q | H | QH | benign            |
| rs859210 | NP_003680 | E | K | EK | possibly damaging |
| rs859398 | NP_003276 | V | I | VI | benign            |
| rs859427 | NP_003276 | R | K | RK | benign            |
| rs860170 | NP_058641 | R | H | RH | possibly damaging |
| rs860213 | NP_114127 | R | Q | RQ | benign            |
| rs861539 | NP_005423 | T | M | TM | benign            |
| rs861853 | NP_689825 | R | W | RW | possibly damaging |
| rs861854 | NP_689825 | R | C | RC | possibly damaging |
| rs862432 | NP_001362 | T | N | TN | possibly damaging |
| rs862708 | NP_065708 | L | P | LP | benign            |
| rs862709 | NP_065708 | E | K | EK | benign            |
| rs863363 | XP_060952 | I | T | IT | benign            |
| rs863642 | NP_078904 | L | P | LP | possibly damaging |
| rs863980 | NP_597707 | A | T | AT | benign            |
| rs864126 | NP_689573 | I | T | IT | benign            |
| rs865093 | NP_775760 | R | W | RW | possibly damaging |
| rs865246 | NP_005752 | T | P | TP | benign            |
| rs866051 | NP_005351 | L | M | LM | benign            |
| rs866085 | NP_001870 | P | A | PA | probably damaging |
| rs866085 | NP_624302 | P | A | PA | probably damaging |
| rs866155 | NP_002876 | Q | H | QH | benign            |
| rs866484 | NP_005522 | S | T | ST | benign            |
| rs866677 | NP_002876 | L | M | LM | benign            |
| rs866936 | NP_742108 | T | A | TA | benign            |
| rs866936 | NP_742111 | T | A | TA | benign            |
| rs866936 | NP_742110 | T | A | TA | benign            |
| rs867186 | NP_006395 | S | G | SG | benign            |
| rs867228 | NP_002020 | E | A | EA | possibly damaging |
| rs867728 | NP_002298 | R | L | RL | possibly damaging |
| rs868044 | NP_001472 | E | K | EK | benign            |

|          |           |   |   |    |                   |
|----------|-----------|---|---|----|-------------------|
| rs868167 | XP_208522 | P | T | PT | possibly damaging |
| rs868188 | NP_055599 | S | G | SG | benign            |
| rs868188 | NP_937879 | S | G | SG | benign            |
| rs868333 | NP_004940 | N | S | NS | benign            |
| rs868333 | NP_077740 | N | S | NS | benign            |
| rs868511 | XP_064152 | S | G | SG | benign            |
| rs868649 | NP_060610 | T | A | TA | benign            |
| rs868738 | NP_006166 | R | C | RC | probably damaging |
| rs868738 | NP_932326 | R | C | RC | probably damaging |
| rs868749 | NP_065574 | P | L | PL | probably damaging |
| rs868749 | NP_066266 | P | L | PL | probably damaging |
| rs868749 | NP_066265 | P | L | PL | probably damaging |
| rs868749 | NP_066264 | P | L | PL | probably damaging |
| rs869171 | NP_057069 | E | K | EK | benign            |
| rs869457 | NP_006050 | P | S | PS | possibly damaging |
| rs869955 | NP_060610 | P | L | PL | probably damaging |
| rs870094 | XP_497729 | L | F | LF | benign            |
| rs870124 | NP_071397 | S | P | SP | benign            |
| rs870124 | NP_955533 | S | P | SP | benign            |
| rs870849 | NP_002277 | T | I | TI | possibly damaging |
| rs870892 | NP_116329 | V | A | VA | benign            |
| rs870957 | NP_114412 | R | G | RG | benign            |
| rs870957 | NP_835281 | R | G | RG | possibly damaging |
| rs871134 | NP_699207 | E | K | EK | benign            |
| rs871443 | NP_000204 | L | P | LP | benign            |
| rs871545 | NP_065778 | N | S | NS | benign            |
| rs871546 | NP_065778 | K | Q | KQ | benign            |
| rs871841 | NP_776089 | L | P | LP | probably damaging |
| rs871866 | XP_499216 | R | G | RG | possibly damaging |
| rs871923 | NP_057480 | A | V | AV | benign            |
| rs871990 | NP_065950 | M | I | MI | benign            |
| rs872013 | XP_497949 | L | F | LF | benign            |
| rs872808 | NP_690603 | C | G | CG | benign            |
| rs873152 | NP_002944 | S | F | SF | probably damaging |
| rs873434 | NP_060365 | R | W | RW | probably damaging |
| rs873967 | XP_371227 | E | K | EK | benign            |
| rs874100 | NP_699165 | A | G | AG | benign            |
| rs874100 | NP_878315 | A | G | AG | benign            |
| rs874101 | NP_699165 | A | G | AG | benign            |
| rs874101 | NP_878315 | A | G | AG | benign            |
| rs874556 | NP_079406 | I | T | IT | possibly damaging |
| rs874628 | NP_116072 | M | V | MV | benign            |
| rs874808 | NP_001362 | E | G | EG | benign            |
| rs874881 | NP_036519 | A | G | AG | benign            |
| rs874889 | NP_061889 | M | I | MI | benign            |
| rs875379 | NP_005551 | H | Y | HY | possibly damaging |

|          |           |   |   |    |                   |
|----------|-----------|---|---|----|-------------------|
| rs876306 | NP_004394 | M | T | MT | possibly damaging |
| rs877386 | NP_071354 | G | A | GA | benign            |
| rs877474 | NP_055880 | C | R | CR | probably damaging |
| rs877834 | NP_071433 | D | G | DG | benign            |
| rs878103 | XP_498013 | D | Y | DY | probably damaging |
| rs878328 | NP_695017 | V | A | VA | benign            |
| rs878328 | NP_695014 | V | A | VA | benign            |
| rs878756 | NP_065882 | S | G | SG | benign            |
| rs878945 | NP_536803 | N | K | NK | benign            |
| rs879577 | NP_055154 | A | V | AV | benign            |
| rs879634 | NP_055594 | A | T | AT | benign            |
| rs879797 | NP_055335 | H | P | HP | benign            |
| rs880525 | NP_115871 | L | M | LM | benign            |
| rs880633 | NP_001267 | R | G | RG | probably damaging |
| rs880750 | NP_940880 | F | S | FS | benign            |
| rs881118 | NP_001810 | N | H | NH | possibly damaging |
| rs881482 | NP_008946 | G | A | GA | possibly damaging |
| rs882610 | NP_060378 | R | H | RH | benign            |
| rs882709 | NP_055861 | A | G | AG | benign            |
| rs882961 | NP_003771 | S | R | SR | benign            |
| rs883541 | NP_060453 | I | T | IT | possibly damaging |
| rs883624 | NP_001558 | H | P | HP | probably damaging |
| rs884928 | NP_001472 | R | Q | RQ | possibly damaging |
| rs885479 | NP_002377 | R | Q | RQ | benign            |
| rs886016 | NP_009032 | M | V | MV | benign            |
| rs886089 | NP_006744 | T | M | TM | benign            |
| rs886090 | NP_006744 | R | W | RW | benign            |
| rs886277 | NP_055370 | N | S | NS | benign            |
| rs887241 | NP_000682 | S | A | SA | benign            |
| rs887515 | NP_009115 | V | A | VA | benign            |
| rs887540 | NP_000657 | N | S | NS | benign            |
| rs887987 | NP_653233 | R | W | RW | probably damaging |
| rs888930 | NP_064594 | S | N | SN | benign            |
| rs889057 | NP_848511 | V | M | VM | benign            |
| rs889248 | XP_376386 | I | V | IV | benign            |
| rs890499 | NP_057726 | R | K | RK | benign            |
| rs890503 | NP_057726 | T | I | TI | benign            |
| rs890757 | NP_071423 | T | S | TS | benign            |
| rs890802 | NP_775736 | T | A | TA | benign            |
| rs890837 | NP_112600 | Q | P | QP | benign            |
| rs890850 | NP_940873 | Y | D | YD | probably damaging |
| rs890853 | NP_940873 | R | H | RH | benign            |
| rs890871 | NP_849159 | L | P | LP | benign            |
| rs890872 | NP_849159 | N | D | ND | benign            |
| rs891174 | NP_892018 | S | T | ST | benign            |
| rs891203 | NP_078854 | A | G | AG | benign            |

|          |           |   |   |    |                   |
|----------|-----------|---|---|----|-------------------|
| rs891398 | NP_000733 | A | T | AT | benign            |
| rs891921 | NP_003053 | A | V | AV | benign            |
| rs892055 | NP_443181 | I | T | IT | benign            |
| rs892055 | NP_733747 | I | T | IT | benign            |
| rs892055 | NP_733748 | I | T | IT | benign            |
| rs892055 | NP_733749 | I | T | IT | benign            |
| rs892145 | NP_443122 | M | K | MK | benign            |
| rs892183 | XP_292723 | S | T | ST | benign            |
| rs893185 | NP_060378 | N | H | NH | benign            |
| rs893253 | NP_055855 | S | T | ST | benign            |
| rs893254 | NP_055855 | L | Q | LQ | benign            |
| rs893489 | XP_497598 | H | R | HR | possibly damaging |
| rs893601 | XP_376720 | S | P | SP | probably damaging |
| rs893602 | XP_376720 | R | C | RC | possibly damaging |
| rs894157 | NP_689472 | C | R | CR | probably damaging |
| rs894281 | XP_496724 | L | F | LF | benign            |
| rs894422 | NP_055321 | T | P | TP | possibly damaging |
| rs895311 | XP_498031 | I | R | IR | possibly damaging |
| rs895311 | XP_498029 | R | I | RI | possibly damaging |
| rs895497 | NP_055255 | Q | R | QR | benign            |
| rs896378 | NP_056174 | L | P | LP | possibly damaging |
| rs896950 | NP_660202 | A | V | AV | benign            |
| rs897065 | XP_371476 | Q | R | QR | benign            |
| rs897066 | XP_371476 | L | M | LM | benign            |
| rs897416 | NP_006762 | S | P | SP | benign            |
| rs897420 | NP_002266 | G | A | GA | benign            |
| rs897453 | NP_680478 | V | I | VI | benign            |
| rs897628 | XP_372755 | G | S | GS | benign            |
| rs897738 | NP_001965 | D | N | DN | benign            |
| rs897804 | NP_037444 | H | Q | HQ | probably damaging |
| rs897945 | NP_078948 | L | F | LF | benign            |
| rs898861 | NP_945340 | V | A | VA | benign            |
| rs899440 | NP_055335 | H | Y | HY | possibly damaging |
| rs899441 | NP_055335 | K | E | KE | benign            |
| rs901363 | XP_087804 | P | S | PS | possibly damaging |
| rs901754 | NP_078998 | P | L | PL | probably damaging |
| rs902393 | NP_079195 | R | C | RC | possibly damaging |
| rs902790 | NP_694547 | D | E | DE | benign            |
| rs903160 | NP_060045 | A | T | AT | benign            |
| rs904383 | NP_060411 | C | R | CR | benign            |
| rs904384 | NP_060411 | N | H | NH | benign            |
| rs904411 | NP_055134 | E | Q | EQ | benign            |
| rs904703 | NP_775934 | T | P | TP | benign            |
| rs904763 | NP_001119 | P | H | PH | benign            |
| rs905192 | XP_499223 | H | R | HR | possibly damaging |
| rs905768 | NP_849195 | G | C | GC | probably damaging |

|          |           |   |   |    |                   |
|----------|-----------|---|---|----|-------------------|
| rs905871 | XP_372349 | I | V | IV | benign            |
| rs906220 | NP_277035 | R | H | RH | benign            |
| rs906807 | NP_066552 | A | V | AV | benign            |
| rs907607 | NP_612634 | G | E | GE | possibly damaging |
| rs907608 | NP_612634 | R | Q | RQ | benign            |
| rs907609 | NP_612634 | T | M | TM | benign            |
| rs907679 | NP_036232 | A | V | AV | benign            |
| rs908828 | NP_001597 | P | H | PH | probably damaging |
| rs908828 | NP_997698 | P | H | PH | probably damaging |
| rs909106 | NP_443069 | I | N | IN | benign            |
| rs909106 | NP_005689 | I | N | IN | probably damaging |
| rs909107 | NP_443069 | V | D | VD | benign            |
| rs909107 | NP_005689 | V | D | VD | possibly damaging |
| rs909150 | NP_002310 | E | D | ED | benign            |
| rs909435 | NP_006744 | A | G | AG | benign            |
| rs909545 | NP_114155 | G | R | GR | benign            |
| rs909713 | XP_210826 | V | G | VG | benign            |
| rs909746 | XP_497654 | S | L | SL | benign            |
| rs910122 | NP_001810 | R | Q | RQ | benign            |
| rs910270 | XP_497678 | R | G | RG | possibly damaging |
| rs910332 | NP_004041 | R | Q | RQ | benign            |
| rs910397 | NP_009169 | V | I | VI | benign            |
| rs910799 | XP_376023 | I | V | IV | benign            |
| rs910925 | NP_056536 | A | G | AG | benign            |
| rs911083 | NP_114425 | S | L | SL | benign            |
| rs911973 | XP_028522 | D | E | DE | benign            |
| rs912174 | NP_694856 | S | A | SA | benign            |
| rs912565 | NP_570970 | T | M | TM | benign            |
| rs912565 | NP_079493 | T | M | TM | benign            |
| rs912566 | NP_570970 | D | E | DE | benign            |
| rs912566 | NP_079493 | D | E | DE | benign            |
| rs913257 | NP_689494 | K | E | KE | benign            |
| rs913588 | NP_055876 | V | I | VI | benign            |
| rs914358 | NP_671492 | L | S | LS | benign            |
| rs914358 | NP_009134 | L | S | LS | benign            |
| rs914644 | NP_055626 | R | K | RK | benign            |
| rs915311 | XP_496351 | M | T | MT | benign            |
| rs915645 | NP_031363 | G | V | GV | possibly damaging |
| rs915645 | NP_005097 | G | V | GV | possibly damaging |
| rs915770 | NP_003674 | K | R | KR | benign            |
| rs915836 | NP_065778 | V | I | VI | benign            |
| rs915877 | NP_003265 | I | M | IM | benign            |
| rs915899 | NP_003926 | T | A | TA | benign            |
| rs916019 | NP_000206 | F | S | FS | probably damaging |
| rs916039 | NP_036505 | W | L | WL | probably damaging |
| rs917340 | XP_375660 | R | H | RH | probably damaging |

|          |           |   |   |    |                   |
|----------|-----------|---|---|----|-------------------|
| rs917361 | NP_060003 | M | I | MI | benign            |
| rs917482 | XP_064190 | E | K | EK | benign            |
| rs917535 | NP_061754 | R | H | RH | benign            |
| rs918291 | NP_060127 | N | T | NT | benign            |
| rs918530 | NP_954854 | L | F | LF | possibly damaging |
| rs918949 | NP_072174 | I | V | IV | benign            |
| rs919364 | NP_055234 | A | T | AT | benign            |
| rs919804 | NP_036583 | R | W | RW | possibly damaging |
| rs920829 | NP_015628 | E | K | EK | benign            |
| rs921122 | NP_060418 | G | S | GS | benign            |
| rs921135 | XP_166910 | D | G | DG | possibly damaging |
| rs921586 | XP_376328 | E | K | EK | benign            |
| rs921587 | XP_376328 | D | A | DA | probably damaging |
| rs922282 | NP_612408 | Q | R | QR | benign            |
| rs922697 | NP_036577 | P | L | PL | benign            |
| rs922984 | NP_596870 | D | G | DG | benign            |
| rs922985 | NP_596870 | F | L | FL | benign            |
| rs922999 | NP_694821 | N | S | NS | benign            |
| rs922999 | NP_620416 | N | S | NS | benign            |
| rs923956 | NP_061760 | F | L | FL | benign            |
| rs924326 | XP_495930 | M | T | MT | possibly damaging |
| rs925176 | XP_290342 | M | T | MT | benign            |
| rs925368 | NP_476511 | N | S | NS | benign            |
| rs925368 | NP_055591 | N | S | NS | benign            |
| rs925368 | NP_631940 | N | S | NS | benign            |
| rs925368 | NP_476510 | N | S | NS | possibly damaging |
| rs926103 | NP_003966 | S | N | SN | benign            |
| rs926333 | NP_055324 | S | N | SN | benign            |
| rs926333 | NP_733795 | S | N | SN | benign            |
| rs926487 | NP_056470 | V | I | VI | benign            |
| rs927340 | XP_376464 | T | I | TI | benign            |
| rs927344 | NP_000383 | F | Y | FY | benign            |
| rs928302 | NP_115781 | V | I | VI | benign            |
| rs928302 | NP_076927 | V | I | VI | benign            |
| rs928661 | XP_166270 | Q | P | QP | benign            |
| rs929038 | NP_061830 | P | L | PL | possibly damaging |
| rs929044 | XP_496823 | T | A | TA | benign            |
| rs929156 | NP_150232 | S | N | SN | benign            |
| rs929223 | NP_787078 | E | K | EK | benign            |
| rs929387 | NP_000159 | L | P | LP | benign            |
| rs929843 | XP_498469 | L | R | LR | probably damaging |
| rs929949 | XP_370686 | N | D | ND | benign            |
| rs930337 | NP_003095 | T | N | TN | possibly damaging |
| rs930557 | NP_078872 | H | D | HD | benign            |
| rs930818 | XP_291062 | V | A | VA | benign            |
| rs930871 | NP_660205 | A | T | AT | benign            |



|          |           |   |   |    |                   |
|----------|-----------|---|---|----|-------------------|
| rs931196 | NP_443089 | Q | H | QH | benign            |
| rs933135 | NP_006216 | R | H | RH | benign            |
| rs933703 | NP_009203 | T | S | TS | benign            |
| rs934335 | NP_060797 | A | P | AP | possibly damaging |
| rs934945 | NP_073728 | G | E | GE | benign            |
| rs934996 | NP_000419 | R | M | RM | possibly damaging |
| rs935172 | XP_059399 | H | R | HR | possibly damaging |
| rs935615 | NP_115519 | E | K | EK | benign            |
| rs935706 | XP_058997 | A | T | AT | benign            |
| rs935707 | XP_058997 | R | H | RH | possibly damaging |
| rs935939 | NP_060925 | D | E | DE | benign            |
| rs936212 | NP_004564 | E | G | EG | benign            |
| rs937631 | NP_006175 | Y | N | YN | probably damaging |
| rs937732 | NP_689548 | R | H | RH | possibly damaging |
| rs937733 | NP_689548 | P | L | PL | possibly damaging |
| rs937838 | NP_003232 | S | T | ST | benign            |
| rs937961 | NP_689810 | H | R | HR | benign            |
| rs938886 | NP_009041 | I | M | IM | benign            |
| rs938952 | NP_003604 | S | G | SG | benign            |
| rs939820 | NP_659475 | R | W | RW | probably damaging |
| rs939875 | XP_037557 | V | I | VI | benign            |
| rs939884 | NP_689885 | V | G | VG | possibly damaging |
| rs939885 | NP_689885 | I | V | IV | benign            |
| rs940389 | NP_758515 | R | T | RT | benign            |
| rs940389 | NP_006864 | R | T | RT | benign            |
| rs940570 | NP_620149 | M | I | MI | possibly damaging |
| rs940611 | NP_473449 | A | P | AP | possibly damaging |
| rs941048 | NP_079006 | M | V | MV | benign            |
| rs941719 | NP_055792 | P | A | PA | possibly damaging |
| rs941920 | XP_029353 | L | P | LP | possibly damaging |
| rs941965 | NP_005637 | S | N | SN | benign            |
| rs942132 | XP_498442 | P | S | PS | possibly damaging |
| rs942268 | XP_496351 | G | A | GA | benign            |
| rs942519 | NP_056219 | M | T | MT | benign            |
| rs943542 | NP_056200 | P | L | PL | probably damaging |
| rs943762 | NP_149118 | R | G | RG | benign            |
| rs943876 | XP_171032 | M | V | MV | possibly damaging |
| rs943992 | XP_370737 | M | T | MT | benign            |
| rs944627 | NP_443171 | P | L | PL | probably damaging |
| rs944893 | NP_005551 | T | M | TM | possibly damaging |
| rs944895 | NP_005551 | R | W | RW | possibly damaging |
| rs945384 | NP_689634 | G | S | GS | benign            |
| rs945508 | NP_055599 | H | R | HR | possibly damaging |
| rs945508 | NP_937879 | H | R | HR | possibly damaging |
| rs946616 | NP_002854 | V | I | VI | benign            |
| rs946724 | XP_496341 | I | V | IV | benign            |

|          |           |   |   |    |                   |
|----------|-----------|---|---|----|-------------------|
| rs946837 | NP_116202 | V | I | VI | benign            |
| rs947310 | NP_542178 | V | L | VL | benign            |
| rs947310 | NP_817130 | V | L | VL | benign            |
| rs947345 | XP_031401 | P | L | PL | probably damaging |
| rs947894 | NP_000843 | I | V | IV | benign            |
| rs948060 | NP_775857 | V | L | VL | benign            |
| rs948445 | NP_542389 | R | Q | RQ | benign            |
| rs948615 | NP_060227 | N | T | NT | benign            |
| rs948962 | NP_000251 | I | L | IL | benign            |
| rs949431 | NP_064445 | S | A | SA | benign            |
| rs949493 | NP_055208 | M | V | MV | possibly damaging |
| rs950164 | XP_060952 | A | S | AS | benign            |
| rs950169 | NP_997400 | T | I | TI | benign            |
| rs951059 | XP_497670 | E | K | EK | benign            |
| rs951060 | XP_497670 | R | C | RC | probably damaging |
| rs951618 | NP_055129 | I | T | IT | benign            |
| rs951773 | NP_149034 | C | R | CR | probably damaging |
| rs951781 | NP_006608 | V | I | VI | benign            |
| rs951833 | NP_659499 | R | W | RW | probably damaging |
| rs952254 | NP_003741 | P | L | PL | probably damaging |
| rs952374 | NP_056028 | E | Q | EQ | benign            |
| rs953338 | NP_006436 | N | T | NT | benign            |
| rs953619 | NP_005764 | F | I | FI | probably damaging |
| rs953635 | NP_036193 | V | G | VG | probably damaging |
| rs953635 | NP_036192 | V | G | VG | probably damaging |
| rs953635 | NP_005681 | V | G | VG | probably damaging |
| rs953767 | NP_079335 | F | S | FS | benign            |
| rs953778 | NP_057695 | P | L | PL | benign            |
| rs953778 | NP_201568 | P | L | PL | benign            |
| rs954440 | NP_001538 | Q | H | QH | possibly damaging |
| rs955417 | NP_003432 | R | K | RK | benign            |
| rs955592 | NP_115589 | T | I | TI | possibly damaging |
| rs955713 | XP_093839 | E | K | EK | benign            |
| rs956868 | NP_061852 | P | T | PT | benign            |
| rs957680 | NP_733792 | N | S | NS | benign            |
| rs957680 | NP_115756 | N | S | NS | benign            |
| rs957680 | NP_733781 | N | S | NS | benign            |
| rs958068 | NP_056193 | S | F | SF | benign            |
| rs958117 | NP_061330 | S | F | SF | benign            |
| rs958305 | NP_116078 | R | K | RK | benign            |
| rs958912 | NP_079429 | R | C | RC | benign            |
| rs958940 | NP_071746 | G | S | GS | benign            |
| rs959317 | XP_166086 | V | G | VG | possibly damaging |
| rs959460 | NP_940862 | V | D | VD | benign            |
| rs959976 | NP_015628 | H | R | HR | benign            |
| rs960173 | NP_005615 | T | A | TA | benign            |

|          |           |   |   |    |                   |
|----------|-----------|---|---|----|-------------------|
| rs960173 | NP_683686 | T | A | TA | benign            |
| rs960193 | XP_166825 | L | R | LR | probably damaging |
| rs960689 | NP_116078 | S | T | ST | benign            |
| rs961360 | NP_056176 | M | V | MV | benign            |
| rs961490 | NP_055641 | R | H | RH | benign            |
| rs961490 | NP_003598 | R | H | RH | benign            |
| rs962976 | NP_059136 | I | T | IT | benign            |
| rs962976 | NP_064513 | T | I | TI | benign            |
| rs963075 | NP_005015 | R | C | RC | possibly damaging |
| rs963981 | NP_115811 | C | G | CG | benign            |
| rs964201 | NP_060606 | H | Y | HY | probably damaging |
| rs964307 | NP_803875 | Y | H | YH | benign            |
| rs965189 | NP_078813 | E | K | EK | benign            |
| rs966185 | NP_060952 | I | V | IV | benign            |
| rs966384 | NP_443204 | P | S | PS | probably damaging |
| rs966845 | NP_006448 | T | A | TA | benign            |
| rs967185 | NP_003741 | E | K | EK | benign            |
| rs968207 | NP_002510 | I | L | IL | benign            |
| rs968381 | NP_003961 | S | N | SN | benign            |
| rs968457 | NP_001562 | R | Q | RQ | benign            |
| rs968502 | NP_115528 | M | V | MV | benign            |
| rs968566 | NP_068773 | L | M | LM | benign            |
| rs968733 | NP_009161 | S | N | SN | benign            |
| rs968733 | NP_057303 | S | N | SN | benign            |
| rs970547 | NP_542376 | S | G | SG | benign            |
| rs970547 | NP_004361 | S | G | SG | benign            |
| rs970881 | NP_619639 | S | N | SN | benign            |
| rs970881 | NP_733842 | S | N | SN | benign            |
| rs971576 | XP_372992 | K | N | KN | benign            |
| rs972806 | NP_940901 | N | S | NS | benign            |
| rs972925 | XP_088491 | Q | R | QR | probably damaging |
| rs972946 | NP_001733 | R | L | RL | possibly damaging |
| rs974963 | NP_079115 | Q | K | QK | benign            |
| rs975263 | NP_877439 | L | S | LS | benign            |
| rs975899 | NP_073153 | R | S | RS | benign            |
| rs976272 | NP_722518 | M | L | ML | benign            |
| rs976714 | XP_168530 | A | T | AT | benign            |
| rs977728 | NP_872412 | M | I | MI | benign            |
| rs978012 | NP_861439 | E | K | EK | benign            |
| rs981684 | NP_853515 | T | I | TI | possibly damaging |
| rs981685 | NP_853515 | S | L | SL | possibly damaging |
| rs983034 | NP_079187 | V | I | VI | benign            |
| rs984274 | NP_005206 | M | V | MV | benign            |
| rs984724 | NP_068590 | P | H | PH | probably damaging |
| rs984819 | XP_045911 | P | L | PL | probably damaging |
| rs984896 | NP_001973 | V | G | VG | probably damaging |

|           |              |   |   |    |                   |
|-----------|--------------|---|---|----|-------------------|
| rs985861  | NP_077739    | C | F | CF | probably damaging |
| rs986178  | NP_653188    | G | D | GD | possibly damaging |
| rs988337  | NP_001763    | I | L | IL | benign            |
| rs988574  | NP_852478    | E | G | EG | possibly damaging |
| rs989298  | NP_002459    | L | M | LM | benign            |
| rs989902  | NP_542415    | Y | D | YD | benign            |
| rs989902  | NP_542416    | Y | D | YD | benign            |
| rs989902  | NP_006255    | Y | D | YD | benign            |
| rs989902  | NP_542414    | Y | D | YD | benign            |
| rs990447  | NP_004849    | L | F | LF | benign            |
| rs992327  | NP_150285    | E | G | EG | possibly damaging |
| rs993658  | XP_210752    | T | S | TS | benign            |
| rs993869  | NP_063946    | A | S | AS | benign            |
| rs997173  | XP_374983    | E | K | EK | benign            |
| rs997983  | NP_002408    | I | L | IL | benign            |
| rs998532  | NP_003585    | K | E | KE | benign            |
| rs998544  | XP_166831    | A | V | AV | benign            |
| rs998688  | NP_001928    | V | M | VM | benign            |
| rs998928  | XP_291204    | T | A | TA | benign            |
| rs999061  | XP_498268    | Q | E | QE | benign            |
| rs999409  | NP_055763    | T | M | TM | benign            |
| rs999409  | NP_955447    | T | M | TM | benign            |
| rs999597  | NP_853631    | R | H | RH | benign            |
| rs999765  | NP_065387    | E | Q | EQ | benign            |
| rs999780  | NP_000583    | P | L | PL | possibly damaging |
| rs999780  | NP_001002029 | P | L | PL | possibly damaging |
| rs999813  | XP_371146    | P | H | PH | probably damaging |
| rs999890  | NP_055855    | S | A | SA | benign            |
| rs999940  | NP_060814    | V | E | VE | probably damaging |
| rs999980  | NP_002667    | F | L | FL | possibly damaging |
| rs1000952 | NP_872343    | R | H | RH | benign            |
| rs1001178 | NP_110392    | S | T | ST | benign            |
| rs1003354 | NP_064421    | T | R | TR | benign            |
| rs1003354 | NP_003777    | T | R | TR | benign            |
| rs1003355 | NP_064421    | A | G | AG | benign            |
| rs1003355 | NP_003777    | A | G | AG | benign            |
| rs1003490 | XP_291816    | A | V | AV | benign            |
| rs1003645 | NP_005055    | V | M | VM | benign            |
| rs1003645 | NP_665905    | V | M | VM | benign            |
| rs1003878 | NP_006772    | P | L | PL | benign            |
| rs1004041 | NP_036599    | L | F | LF | benign            |
| rs1004200 | XP_376720    | H | R | HR | probably damaging |
| rs1004588 | NP_001337    | T | S | TS | benign            |
| rs1004955 | NP_068713    | T | A | TA | benign            |
| rs1004955 | NP_001690    | T | A | TA | benign            |
| rs1004979 | NP_079489    | E | A | EA | benign            |

|           |           |   |   |    |                   |
|-----------|-----------|---|---|----|-------------------|
| rs1004979 | NP_066022 | E | A | EA | benign            |
| rs1005603 | XP_376720 | S | I | SI | possibly damaging |
| rs1006459 | NP_054731 | H | R | HR | benign            |
| rs1006954 | NP_055928 | P | S | PS | possibly damaging |
| rs1007160 | NP_055085 | L | M | LM | benign            |
| rs1007211 | NP_002520 | G | E | GE | possibly damaging |
| rs1007298 | NP_705843 | V | A | VA | benign            |
| rs1007477 | NP_115672 | G | A | GA | possibly damaging |
| rs1008265 | NP_005697 | R | Q | RQ | benign            |
| rs1008328 | XP_496306 | L | F | LF | benign            |
| rs1008336 | XP_376720 | R | C | RC | probably damaging |
| rs1009382 | NP_061978 | E | G | EG | possibly damaging |
| rs1009485 | XP_374831 | S | I | SI | possibly damaging |
| rs1009668 | XP_375848 | V | M | VM | possibly damaging |
| rs1009758 | NP_038267 | D | E | DE | benign            |
| rs1009758 | NP_038286 | D | E | DE | benign            |
| rs1010155 | NP_002309 | E | K | EK | benign            |
| rs1010243 | NP_006246 | I | T | IT | possibly damaging |
| rs1011320 | NP_005018 | P | S | PS | benign            |
| rs1011332 | NP_659419 | E | K | EK | benign            |
| rs1011454 | XP_068889 | V | A | VA | benign            |
| rs1013860 | NP_068506 | V | G | VG | possibly damaging |
| rs1013940 | NP_068587 | I | V | IV | benign            |
| rs1014022 | NP_938052 | E | K | EK | benign            |
| rs1014022 | NP_938051 | E | K | EK | benign            |
| rs1014022 | NP_653197 | E | K | EK | benign            |
| rs1014327 | NP_065960 | S | F | SF | possibly damaging |
| rs1014867 | NP_078858 | P | S | PS | benign            |
| rs1015443 | NP_076409 | N | S | NS | benign            |
| rs1016862 | NP_005903 | I | S | IS | possibly damaging |
| rs1017089 | XP_064190 | N | T | NT | benign            |
| rs1017219 | NP_114092 | M | T | MT | benign            |
| rs1017842 | NP_001202 | E | D | ED | benign            |
| rs1018448 | NP_055385 | R | S | RS | benign            |
| rs1019670 | NP_071744 | T | S | TS | benign            |
| rs1019670 | NP_690591 | T | S | TS | benign            |
| rs1019747 | NP_620687 | P | S | PS | possibly damaging |
| rs1020694 | NP_036529 | G | S | GS | benign            |
| rs1021580 | NP_689836 | C | R | CR | benign            |
| rs1021737 | NP_714964 | S | I | SI | benign            |
| rs1021737 | NP_001893 | S | I | SI | benign            |
| rs1022478 | NP_056468 | F | L | FL | probably damaging |
| rs1023000 | NP_055848 | S | N | SN | benign            |
| rs1023783 | NP_849164 | D | G | DG | benign            |
| rs1024196 | NP_001714 | L | S | LS | benign            |
| rs1024323 | NP_005298 | A | V | AV | benign            |

|           |           |   |   |    |                   |
|-----------|-----------|---|---|----|-------------------|
| rs1024323 | NP_892027 | A | V | AV | benign            |
| rs1024657 | NP_113644 | V | A | VA | benign            |
| rs1025806 | XP_371248 | A | V | AV | benign            |
| rs1026128 | NP_061184 | N | S | NS | benign            |
| rs1026259 | NP_113644 | A | T | AT | benign            |
| rs1026260 | NP_113644 | H | R | HR | probably damaging |
| rs1026261 | NP_113644 | V | A | VA | benign            |
| rs1027335 | NP_055447 | L | P | LP | probably damaging |
| rs1028180 | NP_003657 | Q | R | QR | benign            |
| rs1029365 | NP_079064 | M | V | MV | benign            |
| rs1029366 | NP_689961 | N | Y | NY | possibly damaging |
| rs1029396 | NP_570124 | K | T | KT | possibly damaging |
| rs1029448 | NP_079420 | L | I | LI | benign            |
| rs1029871 | NP_003148 | A | P | AP | benign            |
| rs1030723 | XP_171424 | S | F | SF | probably damaging |
| rs1030726 | XP_171424 | D | Y | DY | probably damaging |
| rs1030986 | NP_997221 | T | A | TA | benign            |
| rs1031639 | NP_078948 | I | M | IM | benign            |
| rs1031904 | NP_071926 | D | H | DH | possibly damaging |
| rs1033500 | NP_006772 | L | P | LP | probably damaging |
| rs1033545 | NP_003425 | T | S | TS | benign            |
| rs1033582 | NP_005609 | S | F | SF | possibly damaging |
| rs1033734 | NP_777638 | S | L | SL | benign            |
| rs1034268 | NP_115633 | L | F | LF | benign            |
| rs1034489 | NP_065960 | A | T | AT | benign            |
| rs1034494 | XP_094074 | F | L | FL | benign            |
| rs1035480 | NP_659437 | R | T | RT | benign            |
| rs1035539 | NP_055382 | P | S | PS | possibly damaging |
| rs1035834 | NP_777559 | F | L | FL | benign            |
| rs1036199 | NP_116171 | L | R | LR | benign            |
| rs1036533 | NP_689737 | G | D | GD | benign            |
| rs1036938 | NP_004381 | C | S | CS | benign            |
| rs1036938 | NP_683880 | C | S | CS | benign            |
| rs1037921 | NP_064568 | N | S | NS | benign            |
| rs1039084 | NP_640337 | S | N | SN | benign            |
| rs1039808 | XP_293656 | A | V | AV | benign            |
| rs1039898 | XP_051017 | R | K | RK | benign            |
| rs1040310 | NP_000491 | D | E | DE | benign            |
| rs1040461 | NP_899050 | G | S | GS | benign            |
| rs1040835 | NP_005104 | F | L | FL | benign            |
| rs1040904 | NP_065099 | P | Q | PQ | benign            |
| rs1041073 | NP_919299 | K | E | KE | benign            |
| rs1041135 | XP_167711 | V | A | VA | benign            |
| rs1041439 | NP_061836 | L | P | LP | benign            |
| rs1041439 | NP_387505 | L | P | LP | benign            |
| rs1041935 | NP_006490 | R | C | RC | benign            |

|           |           |   |   |    |                   |
|-----------|-----------|---|---|----|-------------------|
| rs1041935 | NP_963837 | R | C | RC | benign            |
| rs1041935 | NP_963838 | R | C | RC | benign            |
| rs1041935 | NP_963839 | R | C | RC | benign            |
| rs1041937 | NP_006490 | M | V | MV | benign            |
| rs1041937 | NP_963837 | M | V | MV | benign            |
| rs1041937 | NP_963838 | M | V | MV | benign            |
| rs1041937 | NP_963839 | M | V | MV | benign            |
| rs1041946 | NP_004159 | E | Q | EQ | benign            |
| rs1041948 | XP_171032 | W | S | WS | possibly damaging |
| rs1041951 | NP_000131 | Q | R | QR | benign            |
| rs1041956 | NP_000375 | E | Q | EQ | benign            |
| rs1041960 | NP_000375 | V | L | VL | benign            |
| rs1041961 | NP_002462 | A | S | AS | benign            |
| rs1041961 | NP_000248 | S | A | SA | benign            |
| rs1041965 | NP_004404 | P | S | PS | benign            |
| rs1041967 | NP_058431 | L | W | LW | benign            |
| rs1041967 | NP_005197 | L | W | LW | probably damaging |
| rs1041968 | NP_000375 | D | E | DE | benign            |
| rs1041969 | NP_000659 | N | K | NK | benign            |
| rs1041970 | NP_001783 | S | T | ST | benign            |
| rs1041971 | NP_000375 | T | A | TA | benign            |
| rs1041972 | NP_001783 | I | L | IL | benign            |
| rs1041973 | NP_057316 | A | E | AE | benign            |
| rs1041973 | NP_775661 | A | E | AE | benign            |
| rs1041973 | NP_003847 | A | E | AE | benign            |
| rs1041977 | NP_000658 | E | V | EV | benign            |
| rs1041981 | NP_000586 | T | N | TN | benign            |
| rs1041984 | XP_496518 | D | N | DN | benign            |
| rs1041988 | NP_059488 | I | T | IT | benign            |
| rs1041997 | NP_001807 | R | K | RK | benign            |
| rs1041999 | NP_001806 | P | S | PS | benign            |
| rs1042001 | NP_001677 | E | Q | EQ | possibly damaging |
| rs1042007 | NP_004399 | N | D | ND | possibly damaging |
| rs1042008 | NP_001046 | H | Y | HY | benign            |
| rs1042008 | NP_803565 | H | Y | HY | benign            |
| rs1042008 | NP_803566 | H | Y | HY | benign            |
| rs1042008 | NP_803878 | H | Y | HY | benign            |
| rs1042008 | NP_803880 | H | Y | HY | benign            |
| rs1042011 | NP_001046 | E | Q | EQ | benign            |
| rs1042011 | NP_803565 | E | Q | EQ | benign            |
| rs1042011 | NP_803566 | E | Q | EQ | benign            |
| rs1042011 | NP_803878 | E | Q | EQ | benign            |
| rs1042011 | NP_803880 | E | Q | EQ | benign            |
| rs1042014 | NP_001046 | E | D | ED | benign            |
| rs1042014 | NP_803565 | E | D | ED | benign            |
| rs1042014 | NP_803566 | E | D | ED | benign            |

|           |           |   |   |    |                   |
|-----------|-----------|---|---|----|-------------------|
| rs1042014 | NP_803878 | E | D | ED | benign            |
| rs1042014 | NP_803880 | E | D | ED | benign            |
| rs1042015 | NP_000411 | H | N | HN | benign            |
| rs1042017 | NP_004167 | T | A | TA | benign            |
| rs1042020 | NP_002591 | E | K | EK | benign            |
| rs1042022 | NP_000375 | K | T | KT | benign            |
| rs1042023 | NP_000375 | E | Q | EQ | benign            |
| rs1042025 | NP_000375 | T | I | TI | benign            |
| rs1042027 | NP_000375 | L | F | LF | benign            |
| rs1042031 | NP_000375 | K | E | KE | benign            |
| rs1042036 | NP_000370 | R | P | RP | benign            |
| rs1042038 | NP_004279 | D | N | DN | benign            |
| rs1042044 | NP_002053 | F | L | FL | possibly damaging |
| rs1042051 | NP_852123 | A | V | AV | benign            |
| rs1042051 | NP_852124 | A | V | AV | benign            |
| rs1042051 | NP_852122 | A | V | AV | benign            |
| rs1042052 | NP_004159 | I | V | IV | benign            |
| rs1042053 | NP_852123 | L | F | LF | benign            |
| rs1042053 | NP_852124 | L | F | LF | benign            |
| rs1042053 | NP_852122 | L | F | LF | benign            |
| rs1042056 | NP_004159 | Y | N | YN | benign            |
| rs1042057 | NP_006284 | A | V | AV | benign            |
| rs1042059 | NP_005171 | C | Y | CY | probably damaging |
| rs1042063 | NP_005091 | E | G | EG | possibly damaging |
| rs1042063 | NP_653080 | E | G | EG | possibly damaging |
| rs1042067 | NP_001838 | N | K | NK | benign            |
| rs1042067 | NP_378667 | N | K | NK | benign            |
| rs1042068 | NP_005091 | S | G | SG | benign            |
| rs1042068 | NP_653080 | S | G | SG | benign            |
| rs1042069 | NP_005091 | A | S | AS | benign            |
| rs1042069 | NP_653080 | A | S | AS | benign            |
| rs1042075 | NP_060004 | T | S | TS | benign            |
| rs1042079 | XP_007651 | L | Q | LQ | benign            |
| rs1042101 | NP_001735 | A | V | AV | benign            |
| rs1042109 | NP_004162 | V | D | VD | benign            |
| rs1042114 | NP_000902 | F | C | FC | possibly damaging |
| rs1042117 | NP_002112 | F | Y | FY | benign            |
| rs1042121 | NP_002112 | A | V | AV | benign            |
| rs1042123 | NP_003289 | A | V | AV | benign            |
| rs1042131 | NP_002112 | A | E | AE | probably damaging |
| rs1042133 | NP_002112 | E | D | ED | benign            |
| rs1042136 | NP_002112 | I | L | IL | benign            |
| rs1042140 | NP_002112 | K | E | KE | benign            |
| rs1042151 | NP_002112 | M | V | MV | benign            |
| rs1042153 | NP_002112 | M | I | MI | benign            |
| rs1042155 | NP_000873 | M | T | MT | benign            |



|           |           |   |   |    |                   |
|-----------|-----------|---|---|----|-------------------|
| rs1042160 | NP_002094 | S | R | SR | benign            |
| rs1042164 | NP_004898 | V | A | VA | benign            |
| rs1042169 | NP_002112 | G | D | GD | benign            |
| rs1042170 | NP_004159 | A | T | AT | possibly damaging |
| rs1042172 | NP_000682 | R | P | RP | probably damaging |
| rs1042175 | NP_291032 | M | R | MR | probably damaging |
| rs1042178 | NP_291032 | Q | R | QR | benign            |
| rs1042190 | NP_291032 | K | R | KR | benign            |
| rs1042195 | NP_002854 | E | V | EV | probably damaging |
| rs1042206 | NP_000560 | F | S | FS | benign            |
| rs1042208 | NP_000560 | F | L | FL | benign            |
| rs1042210 | NP_002854 | S | R | SR | benign            |
| rs1042211 | NP_291032 | E | K | EK | benign            |
| rs1042216 | NP_004493 | T | A | TA | benign            |
| rs1042227 | NP_002616 | R | H | RH | benign            |
| rs1042228 | NP_002005 | T | P | TP | benign            |
| rs1042229 | NP_002020 | N | K | NK | benign            |
| rs1042231 | NP_291032 | L | F | LF | benign            |
| rs1042233 | NP_002005 | T | P | TP | benign            |
| rs1042281 | NP_002768 | T | A | TA | benign            |
| rs1042282 | NP_002768 | S | T | ST | benign            |
| rs1042290 | NP_000893 | R | T | RT | possibly damaging |
| rs1042290 | NP_009218 | R | T | RT | possibly damaging |
| rs1042290 | NP_009219 | R | T | RT | possibly damaging |
| rs1042290 | NP_009220 | R | T | RT | possibly damaging |
| rs1042294 | NP_004625 | E | G | EG | possibly damaging |
| rs1042299 | NP_060004 | M | I | MI | benign            |
| rs1042302 | NP_003132 | P | A | PA | probably damaging |
| rs1042303 | NP_001494 | M | V | MV | benign            |
| rs1042308 | NP_291032 | F | V | FV | benign            |
| rs1042315 | NP_775180 | G | R | GR | possibly damaging |
| rs1042315 | NP_775181 | G | R | GR | possibly damaging |
| rs1042316 | NP_775180 | G | A | GA | benign            |
| rs1042316 | NP_775181 | G | A | GA | benign            |
| rs1042318 | NP_002333 | W | C | WC | probably damaging |
| rs1042335 | NP_002112 | T | I | TI | benign            |
| rs1042337 | NP_002109 | I | T | IT | benign            |
| rs1042339 | NP_000825 | I | V | IV | benign            |
| rs1042349 | NP_004137 | E | K | EK | benign            |
| rs1042360 | NP_000013 | K | N | KN | possibly damaging |
| rs1042378 | NP_001684 | A | S | AS | benign            |
| rs1042379 | NP_000060 | D | E | DE | benign            |
| rs1042381 | NP_002989 | S | T | ST | benign            |
| rs1042383 | NP_000078 | Y | S | YS | benign            |
| rs1042391 | NP_006868 | I | F | IF | benign            |
| rs1042393 | NP_000143 | R | H | RH | possibly damaging |

|           |           |   |   |    |                   |
|-----------|-----------|---|---|----|-------------------|
| rs1042395 | NP_000143 | H | R | HR | benign            |
| rs1042401 | NP_056525 | S | R | SR | benign            |
| rs1042435 | NP_000176 | R | K | RK | benign            |
| rs1042437 | NP_001957 | T | K | TK | benign            |
| rs1042438 | NP_001957 | P | T | PT | possibly damaging |
| rs1042457 | NP_004159 | R | H | RH | benign            |
| rs1042498 | NP_000149 | S | C | SC | probably damaging |
| rs1042500 | NP_000736 | R | T | RT | benign            |
| rs1042522 | NP_000537 | R | P | RP | possibly damaging |
| rs1042529 | NP_002582 | E | D | ED | benign            |
| rs1042530 | NP_002582 | E | V | EV | possibly damaging |
| rs1042543 | NP_003045 | R | H | RH | possibly damaging |
| rs1042550 | NP_001141 | G | C | GC | probably damaging |
| rs1042559 | NP_006246 | H | R | HR | probably damaging |
| rs1042579 | NP_000352 | A | V | AV | benign            |
| rs1042581 | NP_061949 | K | R | KR | benign            |
| rs1042593 | NP_061949 | A | T | AT | benign            |
| rs1042594 | NP_061950 | A | T | AT | benign            |
| rs1042594 | NP_061949 | A | T | AT | benign            |
| rs1042597 | NP_061949 | A | G | AG | benign            |
| rs1042600 | NP_004062 | L | H | LH | probably damaging |
| rs1042602 | NP_000363 | S | Y | SY | possibly damaging |
| rs1042608 | NP_000363 | R | T | RT | probably damaging |
| rs1042620 | NP_003373 | R | H | RH | benign            |
| rs1042636 | NP_000379 | R | G | RG | possibly damaging |
| rs1042652 | NP_005032 | G | S | GS | benign            |
| rs1042659 | NP_000298 | A | T | AT | benign            |
| rs1042664 | NP_000054 | F | L | FL | possibly damaging |
| rs1042674 | NP_003376 | A | G | AG | benign            |
| rs1042685 | NP_003376 | K | R | KR | benign            |
| rs1042687 | NP_001706 | V | M | VM | benign            |
| rs1042704 | NP_004986 | D | N | DN | benign            |
| rs1042708 | NP_001063 | S | Y | SY | possibly damaging |
| rs1042709 | NP_066307 | A | P | AP | benign            |
| rs1042709 | NP_000454 | A | P | AP | benign            |
| rs1042709 | NP_009051 | A | P | AP | benign            |
| rs1042709 | NP_061966 | A | P | AP | benign            |
| rs1042709 | NP_061951 | A | P | AP | benign            |
| rs1042709 | NP_061950 | A | P | AP | benign            |
| rs1042709 | NP_061948 | A | P | AP | benign            |
| rs1042709 | NP_061949 | A | P | AP | benign            |
| rs1042709 | NP_995584 | A | P | AP | possibly damaging |
| rs1042713 | NP_000015 | R | G | RG | possibly damaging |
| rs1042714 | NP_000015 | Q | E | QE | benign            |
| rs1042743 | NP_150635 | R | H | RH | benign            |
| rs1042743 | NP_150636 | R | H | RH | benign            |

|           |           |   |   |    |                   |
|-----------|-----------|---|---|----|-------------------|
| rs1042743 | NP_150637 | R | H | RH | benign            |
| rs1042743 | NP_001214 | R | H | RH | benign            |
| rs1042743 | NP_150634 | R | H | RH | benign            |
| rs1042744 | NP_443121 | Q | K | QK | benign            |
| rs1042750 | NP_006226 | A | T | AT | benign            |
| rs1042751 | NP_006226 | R | Q | RQ | benign            |
| rs1042753 | NP_000905 | N | D | ND | benign            |
| rs1042755 | NP_001933 | G | S | GS | benign            |
| rs1042763 | NP_006674 | M | T | MT | benign            |
| rs1042764 | NP_006674 | V | L | VL | benign            |
| rs1042767 | NP_002013 | V | A | VA | benign            |
| rs1042777 | NP_002206 | T | S | TS | benign            |
| rs1042779 | NP_002206 | R | Q | RQ | benign            |
| rs1042780 | NP_006671 | N | K | NK | benign            |
| rs1042784 | NP_004432 | R | W | RW | probably damaging |
| rs1042785 | NP_004432 | M | T | MT | probably damaging |
| rs1042786 | NP_004432 | V | I | VI | benign            |
| rs1042788 | NP_004432 | R | S | RS | benign            |
| rs1042789 | NP_004432 | R | G | RG | benign            |
| rs1042793 | NP_004432 | G | R | GR | benign            |
| rs1042794 | NP_004432 | T | S | TS | benign            |
| rs1042797 | NP_478107 | R | H | RH | benign            |
| rs1042797 | NP_478114 | R | H | RH | benign            |
| rs1042797 | NP_478108 | R | H | RH | possibly damaging |
| rs1042821 | NP_000170 | G | E | GE | benign            |
| rs1042825 | NP_002733 | R | G | RG | possibly damaging |
| rs1042835 | NP_003062 | E | K | EK | benign            |
| rs1042835 | NP_620636 | E | K | EK | benign            |
| rs1042836 | NP_055689 | C | R | CR | benign            |
| rs1042838 | NP_000917 | L | V | LV | benign            |
| rs1042848 | NP_003103 | K | Q | KQ | benign            |
| rs1042849 | NP_002206 | D | E | DE | benign            |
| rs1042854 | NP_000340 | D | A | DA | benign            |
| rs1042855 | NP_620602 | V | L | VL | benign            |
| rs1042855 | NP_620603 | V | L | VL | benign            |
| rs1042855 | NP_002740 | V | L | VL | benign            |
| rs1042856 | NP_001657 | G | C | GC | probably damaging |
| rs1042860 | NP_000677 | C | W | CW | possibly damaging |
| rs1042864 | NP_015558 | F | L | FL | benign            |
| rs1042864 | NP_000012 | F | L | FL | benign            |
| rs1042864 | NP_015557 | L | F | LF | probably damaging |
| rs1042867 | NP_001792 | I | T | IT | benign            |
| rs1042869 | NP_002297 | S | F | SF | possibly damaging |
| rs1042887 | NP_001217 | G | R | GR | probably damaging |
| rs1042900 | NP_005693 | V | A | VA | benign            |
| rs1042904 | NP_002206 | G | C | GC | probably damaging |

|           |           |   |   |    |                   |
|-----------|-----------|---|---|----|-------------------|
| rs1042915 | NP_005919 | H | Q | HQ | possibly damaging |
| rs1042917 | NP_001840 | H | R | HR | benign            |
| rs1042968 | NP_061968 | F | L | FL | possibly damaging |
| rs1042969 | NP_004740 | E | K | EK | benign            |
| rs1042969 | NP_954573 | E | K | EK | benign            |
| rs1042974 | NP_002798 | G | R | GR | probably damaging |
| rs1042989 | NP_006494 | L | F | LF | benign            |
| rs1043004 | NP_002679 | D | N | DN | possibly damaging |
| rs1043006 | NP_361012 | R | P | RP | possibly damaging |
| rs1043010 | NP_361012 | R | P | RP | possibly damaging |
| rs1043015 | NP_002258 | P | S | PS | benign            |
| rs1043054 | XP_496581 | R | T | RT | benign            |
| rs1043059 | NP_079305 | A | V | AV | benign            |
| rs1043062 | NP_005490 | L | R | LR | possibly damaging |
| rs1043073 | NP_079305 | R | H | RH | benign            |
| rs1043102 | NP_114428 | R | L | RL | possibly damaging |
| rs1043126 | NP_064709 | S | L | SL | possibly damaging |
| rs1043140 | NP_001295 | I | T | IT | possibly damaging |
| rs1043152 | NP_079305 | R | Q | RQ | benign            |
| rs1043157 | NP_079474 | V | I | VI | benign            |
| rs1043160 | NP_056495 | T | I | TI | benign            |
| rs1043161 | NP_056495 | R | T | RT | benign            |
| rs1043162 | NP_056495 | R | S | RS | benign            |
| rs1043202 | NP_055126 | N | I | NI | probably damaging |
| rs1043238 | NP_005164 | M | I | MI | probably damaging |
| rs1043238 | NP_777613 | M | I | MI | probably damaging |
| rs1043238 | NP_777614 | M | I | MI | probably damaging |
| rs1043238 | NP_777616 | M | I | MI | probably damaging |
| rs1043238 | NP_777617 | M | I | MI | probably damaging |
| rs1043238 | NP_777618 | M | I | MI | probably damaging |
| rs1043238 | NP_777615 | M | I | MI | probably damaging |
| rs1043301 | NP_076949 | H | P | HP | probably damaging |
| rs1043302 | NP_005561 | R | Q | RQ | benign            |
| rs1043307 | NP_002804 | E | G | EG | possibly damaging |
| rs1043309 | NP_076949 | L | F | LF | benign            |
| rs1043339 | NP_113607 | L | R | LR | possibly damaging |
| rs1043354 | NP_006244 | P | A | PA | benign            |
| rs1043365 | NP_076949 | E | K | EK | benign            |
| rs1043377 | NP_055433 | T | A | TA | benign            |
| rs1043391 | NP_006436 | E | K | EK | possibly damaging |
| rs1043396 | NP_006436 | L | P | LP | probably damaging |
| rs1043399 | NP_006436 | N | H | NH | possibly damaging |
| rs1043401 | NP_006436 | A | S | AS | benign            |
| rs1043424 | NP_115785 | N | T | NT | benign            |
| rs1043437 | NP_066284 | G | R | GR | benign            |
| rs1043438 | NP_066284 | R | W | RW | benign            |

|           |           |   |   |    |                   |
|-----------|-----------|---|---|----|-------------------|
| rs1043439 | NP_066284 | N | K | NK | benign            |
| rs1043440 | NP_066284 | G | R | GR | benign            |
| rs1043442 | NP_066284 | A | T | AT | benign            |
| rs1043442 | NP_932349 | T | A | TA | benign            |
| rs1043446 | NP_066284 | I | L | IL | benign            |
| rs1043446 | NP_932349 | L | I | LI | benign            |
| rs1043448 | NP_006378 | N | H | NH | benign            |
| rs1043455 | NP_001367 | T | I | TI | benign            |
| rs1043478 | XP_496391 | E | G | EG | probably damaging |
| rs1043533 | NP_974223 | E | A | EA | probably damaging |
| rs1043553 | NP_659449 | S | F | SF | possibly damaging |
| rs1043553 | NP_859049 | S | F | SF | possibly damaging |
| rs1043565 | NP_996989 | E | V | EV | possibly damaging |
| rs1043565 | NP_996990 | E | V | EV | possibly damaging |
| rs1043565 | NP_059988 | E | V | EV | possibly damaging |
| rs1043584 | NP_004665 | H | Q | HQ | benign            |
| rs1043594 | NP_899233 | T | A | TA | benign            |
| rs1043613 | NP_004861 | Y | H | YH | possibly damaging |
| rs1043650 | NP_066284 | P | S | PS | possibly damaging |
| rs1043657 | NP_003680 | A | T | AT | benign            |
| rs1043659 | NP_006314 | S | N | SN | benign            |
| rs1043713 | NP_570720 | L | P | LP | possibly damaging |
| rs1043726 | NP_005132 | A | P | AP | probably damaging |
| rs1043730 | NP_679211 | Q | H | QH | possibly damaging |
| rs1043753 | XP_496394 | L | Q | LQ | benign            |
| rs1043754 | XP_496394 | P | R | PR | probably damaging |
| rs1043761 | NP_056198 | H | Y | HY | possibly damaging |
| rs1043770 | NP_009034 | N | Y | NY | possibly damaging |
| rs1043776 | NP_038474 | P | T | PT | benign            |
| rs1043836 | NP_112496 | G | E | GE | benign            |
| rs1043849 | NP_003935 | C | Y | CY | probably damaging |
| rs1043857 | NP_003935 | F | C | FC | possibly damaging |
| rs1043858 | NP_009097 | C | W | CW | benign            |
| rs1043859 | NP_009097 | E | Q | EQ | benign            |
| rs1043860 | NP_003935 | A | T | AT | benign            |
| rs1043876 | NP_003787 | R | G | RG | benign            |
| rs1043876 | NP_604431 | R | G | RG | probably damaging |
| rs1043878 | NP_054701 | P | H | PH | probably damaging |
| rs1043878 | NP_002285 | P | H | PH | probably damaging |
| rs1043879 | NP_064713 | E | G | EG | possibly damaging |
| rs1043886 | NP_078813 | Q | P | QP | benign            |
| rs1043887 | XP_497068 | H | N | HN | benign            |
| rs1043895 | NP_005001 | K | N | KN | benign            |
| rs1043930 | NP_057374 | E | D | ED | benign            |
| rs1043942 | NP_009108 | A | S | AS | benign            |
| rs1043963 | NP_114147 | A | V | AV | benign            |

|           |           |   |   |    |                   |
|-----------|-----------|---|---|----|-------------------|
| rs1043993 | NP_620709 | N | S | NS | benign            |
| rs1043993 | NP_002743 | N | S | NS | benign            |
| rs1043993 | NP_620707 | N | S | NS | possibly damaging |
| rs1043993 | NP_620708 | N | S | NS | possibly damaging |
| rs1044009 | NP_000426 | V | A | VA | benign            |
| rs1044032 | NP_067022 | I | T | IT | benign            |
| rs1044049 | NP_004997 | V | F | VF | possibly damaging |
| rs1044056 | NP_055661 | A | V | AV | benign            |
| rs1044057 | NP_003560 | T | A | TA | benign            |
| rs1044058 | XP_290345 | W | L | WL | probably damaging |
| rs1044066 | NP_004286 | R | G | RG | probably damaging |
| rs1044092 | NP_006085 | N | S | NS | benign            |
| rs1044092 | NP_872584 | N | S | NS | benign            |
| rs1044093 | NP_872584 | E | V | EV | benign            |
| rs1044093 | NP_006085 | E | V | EV | probably damaging |
| rs1044094 | NP_872584 | S | C | SC | benign            |
| rs1044094 | NP_006085 | S | C | SC | possibly damaging |
| rs1044112 | NP_060680 | P | T | PT | probably damaging |
| rs1044114 | NP_490597 | D | N | DN | benign            |
| rs1044128 | NP_060725 | H | P | HP | probably damaging |
| rs1044133 | NP_060725 | H | P | HP | probably damaging |
| rs1044134 | NP_060725 | T | P | TP | possibly damaging |
| rs1044136 | NP_009200 | G | E | GE | possibly damaging |
| rs1044137 | NP_009200 | G | C | GC | probably damaging |
| rs1044140 | NP_038476 | N | K | NK | benign            |
| rs1044140 | NP_872589 | N | K | NK | benign            |
| rs1044141 | NP_004751 | E | K | EK | benign            |
| rs1044157 | NP_699173 | L | F | LF | benign            |
| rs1044163 | NP_003565 | M | T | MT | probably damaging |
| rs1044163 | NP_919415 | M | T | MT | probably damaging |
| rs1044174 | NP_003565 | A | V | AV | benign            |
| rs1044174 | NP_919415 | A | V | AV | benign            |
| rs1044178 | NP_003565 | L | W | LW | possibly damaging |
| rs1044178 | NP_919415 | L | W | LW | possibly damaging |
| rs1044184 | NP_055113 | H | N | HN | benign            |
| rs1044187 | NP_003565 | M | T | MT | possibly damaging |
| rs1044187 | NP_919415 | M | T | MT | possibly damaging |
| rs1044188 | NP_003565 | K | Q | KQ | benign            |
| rs1044188 | NP_919415 | K | Q | KQ | benign            |
| rs1044190 | NP_003565 | V | A | VA | benign            |
| rs1044190 | NP_919415 | V | A | VA | benign            |
| rs1044192 | NP_003565 | N | H | NH | benign            |
| rs1044192 | NP_919415 | N | H | NH | benign            |
| rs1044194 | NP_003565 | T | P | TP | possibly damaging |
| rs1044194 | NP_919415 | T | P | TP | possibly damaging |
| rs1044240 | NP_001618 | N | S | NS | benign            |

|           |           |   |   |    |                   |
|-----------|-----------|---|---|----|-------------------|
| rs1044243 | NP_001618 | M | T | MT | possibly damaging |
| rs1044249 | NP_002551 | A | S | AS | benign            |
| rs1044249 | NP_780777 | A | S | AS | benign            |
| rs1044250 | NP_647475 | T | M | TM | benign            |
| rs1044267 | NP_001805 | Q | H | QH | possibly damaging |
| rs1044280 | XP_291015 | Q | H | QH | possibly damaging |
| rs1044287 | NP_006313 | T | S | TS | benign            |
| rs1044289 | NP_006313 | S | I | SI | benign            |
| rs1044310 | NP_037541 | S | A | SA | benign            |
| rs1044367 | NP_003743 | T | P | TP | benign            |
| rs1044375 | NP_848567 | T | K | TK | possibly damaging |
| rs1044418 | NP_114128 | V | I | VI | benign            |
| rs1044419 | NP_848696 | A | P | AP | benign            |
| rs1044419 | NP_848695 | A | P | AP | possibly damaging |
| rs1044419 | NP_110416 | A | P | AP | possibly damaging |
| rs1044440 | XP_372108 | Q | R | QR | benign            |
| rs1044442 | NP_563614 | P | L | PL | benign            |
| rs1044444 | NP_563614 | V | M | VM | benign            |
| rs1044445 | NP_563614 | R | C | RC | probably damaging |
| rs1044447 | NP_563614 | D | G | DG | benign            |
| rs1044463 | NP_003091 | A | S | AS | benign            |
| rs1044498 | NP_006199 | K | Q | KQ | benign            |
| rs1044521 | NP_542786 | A | P | AP | possibly damaging |
| rs1044539 | NP_055215 | S | I | SI | benign            |
| rs1044553 | NP_000746 | P | S | PS | probably damaging |
| rs1044553 | NP_003994 | P | S | PS | probably damaging |
| rs1044554 | NP_000746 | M | T | MT | probably damaging |
| rs1044554 | NP_003994 | M | T | MT | probably damaging |
| rs1044565 | NP_940818 | E | G | EG | probably damaging |
| rs1044567 | NP_001238 | V | L | VL | benign            |
| rs1044575 | NP_660214 | A | T | AT | benign            |
| rs1044615 | XP_038288 | W | R | WR | probably damaging |
| rs1044640 | NP_872286 | D | Y | DY | possibly damaging |
| rs1044640 | NP_872282 | D | Y | DY | possibly damaging |
| rs1044641 | NP_055051 | T | P | TP | benign            |
| rs1044655 | NP_061156 | L | F | LF | benign            |
| rs1044692 | NP_002486 | T | P | TP | possibly damaging |
| rs1044697 | NP_006459 | H | R | HR | benign            |
| rs1044704 | NP_002902 | N | I | NI | benign            |
| rs1044737 | NP_036553 | L | H | LH | benign            |
| rs1044738 | NP_036553 | S | T | ST | benign            |
| rs1044740 | NP_036553 | L | Q | LQ | benign            |
| rs1044803 | NP_005151 | V | M | VM | probably damaging |
| rs1044808 | NP_057158 | G | A | GA | benign            |
| rs1044848 | NP_001452 | P | S | PS | benign            |
| rs1044862 | NP_006323 | I | M | IM | benign            |

|           |           |   |   |    |                   |
|-----------|-----------|---|---|----|-------------------|
| rs1044877 | NP_115534 | M | V | MV | benign            |
| rs1044877 | NP_683738 | M | V | MV | benign            |
| rs1044877 | NP_663620 | M | V | MV | benign            |
| rs1044877 | NP_684281 | M | V | MV | benign            |
| rs1044881 | NP_115534 | G | S | GS | benign            |
| rs1044881 | NP_683738 | G | S | GS | benign            |
| rs1044881 | NP_663620 | G | S | GS | benign            |
| rs1044881 | NP_684281 | G | S | GS | benign            |
| rs1044892 | NP_963853 | A | S | AS | benign            |
| rs1044904 | NP_115534 | K | E | KE | benign            |
| rs1044904 | NP_683738 | K | E | KE | benign            |
| rs1044904 | NP_663620 | K | E | KE | benign            |
| rs1044904 | NP_684281 | K | E | KE | benign            |
| rs1044928 | NP_115534 | M | V | MV | benign            |
| rs1044928 | NP_683738 | M | V | MV | benign            |
| rs1044928 | NP_663620 | M | V | MV | benign            |
| rs1044928 | NP_684281 | M | V | MV | benign            |
| rs1044929 | NP_115534 | M | T | MT | benign            |
| rs1044929 | NP_683738 | M | T | MT | benign            |
| rs1044929 | NP_684281 | M | T | MT | benign            |
| rs1044929 | NP_683881 | C | R | CR | possibly damaging |
| rs1044935 | NP_071401 | P | T | PT | possibly damaging |
| rs1044940 | NP_115534 | V | I | VI | benign            |
| rs1044940 | NP_683881 | V | I | VI | benign            |
| rs1044940 | NP_683738 | V | I | VI | benign            |
| rs1044941 | NP_115534 | R | H | RH | benign            |
| rs1044941 | NP_683881 | R | H | RH | benign            |
| rs1044941 | NP_683738 | R | H | RH | benign            |
| rs1044950 | NP_689853 | A | V | AV | benign            |
| rs1044962 | NP_006455 | A | G | AG | benign            |
| rs1044963 | NP_006455 | Q | L | QL | possibly damaging |
| rs1044964 | NP_006455 | K | Q | KQ | benign            |
| rs1044965 | NP_006455 | Q | P | QP | possibly damaging |
| rs1044966 | NP_006455 | Q | H | QH | possibly damaging |
| rs1044968 | NP_006450 | E | K | EK | benign            |
| rs1044969 | NP_006455 | E | G | EG | possibly damaging |
| rs1044980 | NP_757386 | Q | H | QH | possibly damaging |
| rs1044998 | NP_006022 | R | M | RM | benign            |
| rs1045002 | NP_060413 | I | N | IN | benign            |
| rs1045012 | NP_005711 | K | N | KN | possibly damaging |
| rs1045023 | NP_078848 | S | F | SF | benign            |
| rs1045031 | NP_071359 | T | M | TM | benign            |
| rs1045049 | NP_057387 | E | Q | EQ | benign            |
| rs1045051 | NP_579917 | L | R | LR | possibly damaging |
| rs1045051 | NP_579922 | L | R | LR | possibly damaging |
| rs1045051 | NP_579919 | L | R | LR | possibly damaging |



|           |           |   |   |    |                   |
|-----------|-----------|---|---|----|-------------------|
| rs1045058 | NP_060946 | S | N | SN | benign            |
| rs1045061 | NP_060946 | S | I | SI | benign            |
| rs1045063 | NP_060946 | M | V | MV | benign            |
| rs1045065 | NP_060946 | A | V | AV | benign            |
| rs1045072 | XP_209178 | P | Q | PQ | probably damaging |
| rs1045082 | NP_060946 | M | I | MI | benign            |
| rs1045094 | NP_060738 | S | F | SF | benign            |
| rs1045102 | NP_006305 | K | M | KM | benign            |
| rs1045105 | NP_006305 | N | H | NH | benign            |
| rs1045117 | XP_047325 | A | V | AV | benign            |
| rs1045141 | NP_067653 | H | Q | HQ | possibly damaging |
| rs1045142 | NP_005397 | R | Q | RQ | possibly damaging |
| rs1045216 | NP_067635 | T | A | TA | benign            |
| rs1045228 | NP_060779 | A | V | AV | benign            |
| rs1045236 | NP_004877 | I | F | IF | benign            |
| rs1045264 | NP_055816 | A | S | AS | benign            |
| rs1045265 | NP_055816 | V | L | VL | benign            |
| rs1045304 | NP_036422 | E | D | ED | benign            |
| rs1045312 | NP_036422 | D | V | DV | probably damaging |
| rs1045315 | NP_055639 | S | T | ST | benign            |
| rs1045317 | NP_036422 | N | Y | NY | possibly damaging |
| rs1045318 | NP_036422 | N | S | NS | benign            |
| rs1045328 | NP_000716 | V | L | VL | benign            |
| rs1045330 | NP_057128 | Q | L | QL | probably damaging |
| rs1045332 | NP_057128 | M | T | MT | probably damaging |
| rs1045333 | NP_057128 | M | I | MI | probably damaging |
| rs1045349 | NP_057128 | G | S | GS | possibly damaging |
| rs1045359 | NP_964011 | F | L | FL | probably damaging |
| rs1045367 | NP_003697 | I | M | IM | possibly damaging |
| rs1045451 | NP_573438 | P | R | PR | benign            |
| rs1045451 | NP_573439 | R | P | RP | benign            |
| rs1045451 | NP_005695 | R | P | RP | benign            |
| rs1045485 | NP_001219 | D | H | DH | benign            |
| rs1045485 | NP_203520 | D | H | DH | benign            |
| rs1045485 | NP_203519 | D | H | DH | benign            |
| rs1045489 | NP_055444 | R | K | RK | benign            |
| rs1045513 | XP_498429 | E | Q | EQ | benign            |
| rs1045546 | NP_060479 | T | M | TM | benign            |
| rs1045550 | NP_060586 | C | F | CF | probably damaging |
| rs1045642 | NP_000918 | I | M | IM | benign            |
| rs1045644 | NP_004077 | T | S | TS | benign            |
| rs1045650 | NP_005871 | S | I | SI | probably damaging |
| rs1045660 | NP_995314 | I | T | IT | possibly damaging |
| rs1045660 | NP_038464 | I | T | IT | possibly damaging |
| rs1045675 | NP_065090 | S | F | SF | benign            |
| rs1045677 | NP_065090 | H | Y | HY | benign            |

|           |           |   |   |    |                   |
|-----------|-----------|---|---|----|-------------------|
| rs1045678 | NP_065090 | L | V | LV | benign            |
| rs1045679 | NP_065090 | H | N | HN | possibly damaging |
| rs1045695 | NP_004529 | W | R | WR | probably damaging |
| rs1045706 | NP_055634 | R | Q | RQ | benign            |
| rs1045709 | NP_620124 | A | V | AV | benign            |
| rs1045789 | NP_438169 | D | E | DE | benign            |
| rs1045818 | NP_006660 | H | Y | HY | benign            |
| rs1045837 | NP_057665 | H | P | HP | benign            |
| rs1045852 | XP_030892 | R | L | RL | benign            |
| rs1045854 | NP_001208 | L | V | LV | benign            |
| rs1045860 | NP_057415 | E | Q | EQ | benign            |
| rs1045910 | NP_542398 | G | D | GD | possibly damaging |
| rs1045920 | NP_542398 | I | F | IF | benign            |
| rs1045922 | NP_005606 | R | Q | RQ | benign            |
| rs1045933 | NP_116056 | S | F | SF | benign            |
| rs1045944 | NP_116056 | E | K | EK | benign            |
| rs1045961 | NP_057546 | S | R | SR | possibly damaging |
| rs1045964 | NP_057546 | F | L | FL | benign            |
| rs1045967 | NP_057546 | N | I | NI | benign            |
| rs1045980 | NP_057546 | P | S | PS | benign            |
| rs1045986 | NP_057546 | H | D | HD | probably damaging |
| rs1046004 | NP_002227 | S | N | SN | benign            |
| rs1046005 | NP_002227 | G | S | GS | possibly damaging |
| rs1046032 | NP_976251 | F | S | FS | benign            |
| rs1046043 | NP_005547 | E | G | EG | benign            |
| rs1046049 | NP_064560 | Y | C | YC | probably damaging |
| rs1046059 | XP_088525 | R | L | RL | probably damaging |
| rs1046082 | NP_004629 | A | G | AG | benign            |
| rs1046082 | NP_542417 | A | G | AG | benign            |
| rs1046084 | NP_004629 | R | C | RC | possibly damaging |
| rs1046084 | NP_542417 | R | C | RC | possibly damaging |
| rs1046086 | NP_004629 | G | R | GR | possibly damaging |
| rs1046086 | NP_542417 | G | R | GR | possibly damaging |
| rs1046088 | NP_001420 | P | Q | PQ | benign            |
| rs1046089 | NP_004629 | H | R | HR | benign            |
| rs1046089 | NP_542417 | H | R | HR | benign            |
| rs1046097 | NP_057521 | M | V | MV | benign            |
| rs1046116 | NP_004563 | P | L | PL | probably damaging |
| rs1046166 | NP_598397 | R | H | RH | possibly damaging |
| rs1046184 | NP_005853 | N | S | NS | benign            |
| rs1046219 | NP_056286 | K | E | KE | benign            |
| rs1046247 | NP_005848 | E | K | EK | benign            |
| rs1046248 | NP_000614 | R | C | RC | benign            |
| rs1046256 | NP_006262 | N | K | NK | possibly damaging |
| rs1046266 | NP_060526 | L | P | LP | possibly damaging |
| rs1046268 | NP_055243 | M | T | MT | possibly damaging |

|           |           |   |   |    |                   |
|-----------|-----------|---|---|----|-------------------|
| rs1046297 | NP_067034 | V | I | VI | benign            |
| rs1046298 | NP_004254 | S | N | SN | benign            |
| rs1046301 | NP_002827 | V | A | VA | benign            |
| rs1046301 | NP_543031 | V | A | VA | benign            |
| rs1046307 | NP_057258 | P | T | PT | possibly damaging |
| rs1046352 | NP_060651 | Q | E | QE | benign            |
| rs1046356 | XP_034594 | R | Q | RQ | benign            |
| rs1046362 | NP_005547 | R | C | RC | benign            |
| rs1046375 | NP_001373 | R | L | RL | probably damaging |
| rs1046394 | NP_005494 | G | C | GC | probably damaging |
| rs1046403 | NP_443167 | V | A | VA | benign            |
| rs1046404 | NP_443167 | C | S | CS | benign            |
| rs1046428 | NP_665877 | M | T | MT | benign            |
| rs1046428 | NP_001504 | M | T | MT | probably damaging |
| rs1046432 | NP_003791 | I | M | IM | probably damaging |
| rs1046457 | NP_085911 | I | V | IV | benign            |
| rs1046480 | NP_065155 | G | S | GS | benign            |
| rs1046485 | NP_036442 | L | S | LS | benign            |
| rs1046487 | NP_036442 | V | G | VG | benign            |
| rs1046488 | NP_036442 | E | Q | EQ | benign            |
| rs1046490 | NP_036442 | A | P | AP | benign            |
| rs1046498 | NP_056508 | P | Q | PQ | benign            |
| rs1046501 | NP_056508 | I | F | IF | benign            |
| rs1046515 | NP_443085 | P | L | PL | probably damaging |
| rs1046558 | NP_073734 | G | S | GS | benign            |
| rs1046572 | NP_002958 | A | P | AP | benign            |
| rs1046609 | NP_009142 | T | S | TS | benign            |
| rs1046631 | NP_071932 | E | V | EV | benign            |
| rs1046663 | NP_060283 | R | S | RS | probably damaging |
| rs1046668 | NP_009046 | Q | R | QR | benign            |
| rs1046688 | NP_004778 | E | D | ED | benign            |
| rs1046689 | NP_653182 | D | Y | DY | probably damaging |
| rs1046701 | NP_653182 | A | V | AV | benign            |
| rs1046712 | NP_000121 | I | L | IL | benign            |
| rs1046714 | NP_002568 | V | L | VL | possibly damaging |
| rs1046742 | NP_006327 | E | K | EK | benign            |
| rs1046755 | NP_004084 | Y | H | YH | benign            |
| rs1046756 | NP_004629 | L | P | LP | benign            |
| rs1046756 | NP_542417 | L | P | LP | benign            |
| rs1046765 | NP_201575 | G | V | GV | benign            |
| rs1046791 | NP_036601 | P | R | PR | possibly damaging |
| rs1046804 | NP_001867 | T | A | TA | possibly damaging |
| rs1046806 | NP_056498 | R | L | RL | probably damaging |
| rs1046815 | NP_003089 | L | F | LF | benign            |
| rs1046823 | NP_060551 | G | V | GV | benign            |
| rs1046871 | NP_079175 | T | I | TI | benign            |

|           |           |   |   |    |                   |
|-----------|-----------|---|---|----|-------------------|
| rs1046902 | XP_374396 | S | F | SF | possibly damaging |
| rs1046921 | XP_376965 | A | G | AG | benign            |
| rs1046923 | XP_376965 | R | G | RG | possibly damaging |
| rs1046934 | NP_443197 | Q | H | QH | benign            |
| rs1046937 | NP_443197 | G | V | GV | probably damaging |
| rs1046942 | NP_000924 | K | T | KT | benign            |
| rs1046942 | NP_877949 | K | T | KT | benign            |
| rs1046955 | NP_004177 | A | G | AG | benign            |
| rs1046957 | NP_005351 | S | R | SR | benign            |
| rs1046961 | NP_057133 | T | P | TP | benign            |
| rs1046975 | NP_001272 | R | S | RS | benign            |
| rs1046976 | NP_000532 | A | V | AV | benign            |
| rs1046984 | NP_000050 | F | S | FS | possibly damaging |
| rs1046992 | NP_031377 | I | T | IT | benign            |
| rs1046993 | NP_031377 | L | S | LS | benign            |
| rs1046996 | NP_002638 | K | N | KN | benign            |
| rs1046997 | NP_002638 | L | S | LS | benign            |
| rs1046998 | NP_002638 | K | N | KN | benign            |
| rs1047003 | NP_060255 | K | N | KN | benign            |
| rs1047005 | NP_000829 | S | P | SP | benign            |
| rs1047011 | NP_002580 | L | V | LV | benign            |
| rs1047011 | NP_115832 | L | V | LV | benign            |
| rs1047011 | NP_115833 | L | V | LV | benign            |
| rs1047034 | NP_612371 | I | L | IL | benign            |
| rs1047037 | NP_612371 | S | G | SG | benign            |
| rs1047042 | NP_612371 | D | N | DN | benign            |
| rs1047043 | NP_258411 | E | A | EA | benign            |
| rs1047076 | NP_075258 | Q | H | QH | benign            |
| rs1047076 | NP_075263 | Q | H | QH | benign            |
| rs1047076 | NP_075265 | Q | H | QH | benign            |
| rs1047076 | NP_075419 | Q | H | QH | benign            |
| rs1047076 | NP_075420 | Q | H | QH | benign            |
| rs1047076 | NP_075264 | Q | H | QH | benign            |
| rs1047077 | NP_075258 | N | I | NI | probably damaging |
| rs1047077 | NP_075263 | N | I | NI | probably damaging |
| rs1047077 | NP_075265 | N | I | NI | probably damaging |
| rs1047077 | NP_075419 | N | I | NI | probably damaging |
| rs1047077 | NP_075420 | N | I | NI | probably damaging |
| rs1047077 | NP_075264 | N | I | NI | probably damaging |
| rs1047078 | NP_075258 | Q | H | QH | benign            |
| rs1047078 | NP_075263 | Q | H | QH | benign            |
| rs1047078 | NP_075265 | Q | H | QH | benign            |
| rs1047078 | NP_075419 | Q | H | QH | benign            |
| rs1047078 | NP_075420 | Q | H | QH | benign            |
| rs1047083 | NP_075258 | Y | S | YS | benign            |
| rs1047083 | NP_075265 | Y | S | YS | benign            |

|           |           |   |   |    |                   |
|-----------|-----------|---|---|----|-------------------|
| rs1047083 | NP_075419 | Y | S | YS | benign            |
| rs1047083 | NP_075420 | Y | S | YS | benign            |
| rs1047083 | NP_075264 | Y | S | YS | benign            |
| rs1047087 | NP_075258 | I | M | IM | benign            |
| rs1047087 | NP_075263 | I | M | IM | benign            |
| rs1047087 | NP_075265 | I | M | IM | benign            |
| rs1047087 | NP_075419 | I | M | IM | benign            |
| rs1047087 | NP_075420 | I | M | IM | benign            |
| rs1047087 | NP_075264 | I | M | IM | benign            |
| rs1047088 | NP_075258 | I | T | IT | benign            |
| rs1047088 | NP_075263 | I | T | IT | benign            |
| rs1047088 | NP_075265 | I | T | IT | benign            |
| rs1047088 | NP_075419 | I | T | IT | benign            |
| rs1047088 | NP_075420 | I | T | IT | benign            |
| rs1047088 | NP_075264 | I | T | IT | benign            |
| rs1047095 | NP_075258 | A | E | AE | benign            |
| rs1047095 | NP_075263 | A | E | AE | benign            |
| rs1047095 | NP_075265 | A | E | AE | benign            |
| rs1047095 | NP_075419 | A | E | AE | benign            |
| rs1047095 | NP_075420 | A | E | AE | benign            |
| rs1047095 | NP_075264 | A | E | AE | benign            |
| rs1047098 | NP_003702 | L | F | LF | benign            |
| rs1047099 | NP_057438 | V | I | VI | benign            |
| rs1047191 | NP_079487 | H | N | HN | probably damaging |
| rs1047196 | NP_064578 | V | A | VA | benign            |
| rs1047216 | NP_005718 | K | E | KE | benign            |
| rs1047222 | NP_005997 | G | D | GD | possibly damaging |
| rs1047223 | NP_001622 | L | H | LH | probably damaging |
| rs1047229 | NP_000327 | G | A | GA | benign            |
| rs1047247 | NP_004455 | I | R | IR | benign            |
| rs1047247 | NP_149134 | R | I | RI | benign            |
| rs1047251 | NP_002353 | T | A | TA | benign            |
| rs1047254 | NP_004501 | E | G | EG | possibly damaging |
| rs1047254 | NP_536349 | E | G | EG | possibly damaging |
| rs1047254 | NP_004500 | E | G | EG | possibly damaging |
| rs1047266 | NP_003833 | A | V | AV | benign            |
| rs1047266 | NP_671716 | A | V | AV | benign            |
| rs1047286 | NP_000055 | L | P | LP | possibly damaging |
| rs1047288 | NP_002703 | L | Q | LQ | possibly damaging |
| rs1047291 | NP_000195 | Y | S | YS | possibly damaging |
| rs1047292 | NP_078905 | L | M | LM | benign            |
| rs1047303 | NP_000853 | T | N | TN | possibly damaging |
| rs1047315 | NP_004559 | F | L | FL | probably damaging |
| rs1047325 | NP_005969 | S | N | SN | benign            |
| rs1047372 | NP_061759 | G | D | GD | benign            |
| rs1047375 | NP_000341 | H | L | HL | possibly damaging |

|           |           |   |   |    |                   |
|-----------|-----------|---|---|----|-------------------|
| rs1047379 | NP_000341 | L | P | LP | probably damaging |
| rs1047380 | NP_597816 | K | E | KE | benign            |
| rs1047382 | NP_597816 | V | A | VA | benign            |
| rs1047386 | NP_597816 | Y | H | YH | possibly damaging |
| rs1047387 | NP_597816 | R | G | RG | possibly damaging |
| rs1047390 | NP_061965 | D | G | DG | possibly damaging |
| rs1047391 | NP_061964 | G | R | GR | probably damaging |
| rs1047437 | NP_694955 | Q | H | QH | benign            |
| rs1047452 | NP_003416 | A | T | AT | benign            |
| rs1047462 | NP_958802 | V | M | VM | benign            |
| rs1047462 | NP_963892 | V | M | VM | benign            |
| rs1047552 | NP_112591 | F | L | FL | benign            |
| rs1047626 | NP_006336 | V | M | VM | benign            |
| rs1047640 | NP_003102 | T | A | TA | benign            |
| rs1047642 | NP_060337 | K | R | KR | benign            |
| rs1047673 | NP_060337 | E | D | ED | benign            |
| rs1047677 | XP_372076 | R | L | RL | benign            |
| rs1047679 | XP_496576 | T | I | TI | benign            |
| rs1047701 | NP_000325 | R | P | RP | probably damaging |
| rs1047705 | NP_000325 | D | N | DN | benign            |
| rs1047706 | NP_060337 | E | D | ED | benign            |
| rs1047716 | NP_060337 | S | R | SR | benign            |
| rs1047719 | NP_060337 | Q | K | QK | benign            |
| rs1047726 | NP_060337 | L | F | LF | benign            |
| rs1047740 | NP_076994 | V | I | VI | benign            |
| rs1047751 | XP_372076 | F | L | FL | benign            |
| rs1047769 | NP_000114 | M | V | MV | possibly damaging |
| rs1047781 | NP_000502 | I | F | IF | benign            |
| rs1047789 | NP_005574 | A | P | AP | benign            |
| rs1047840 | NP_003677 | E | K | EK | benign            |
| rs1047840 | NP_569082 | E | K | EK | benign            |
| rs1047844 | NP_036219 | S | L | SL | possibly damaging |
| rs1047848 | NP_057257 | S | F | SF | benign            |
| rs1047851 | NP_006567 | L | M | LM | benign            |
| rs1047855 | NP_001239 | V | A | VA | benign            |
| rs1047856 | NP_006171 | N | Y | NY | possibly damaging |
| rs1047886 | NP_001866 | F | S | FS | probably damaging |
| rs1047887 | NP_001866 | M | L | ML | benign            |
| rs1047911 | NP_444278 | A | S | AS | benign            |
| rs1047962 | NP_758455 | H | P | HP | probably damaging |
| rs1047965 | NP_001633 | E | K | EK | benign            |
| rs1047972 | NP_003591 | I | V | IV | benign            |
| rs1047972 | NP_940835 | I | V | IV | benign            |
| rs1047972 | NP_940836 | I | V | IV | benign            |
| rs1047972 | NP_940837 | I | V | IV | benign            |
| rs1047972 | NP_940838 | I | V | IV | benign            |

|           |           |   |   |    |                   |
|-----------|-----------|---|---|----|-------------------|
| rs1047972 | NP_940839 | I | V | IV | benign            |
| rs1047976 | NP_059143 | Q | R | QR | benign            |
| rs1047978 | NP_059143 | E | D | ED | benign            |
| rs1047991 | NP_060579 | R | C | RC | possibly damaging |
| rs1047994 | NP_835224 | V | A | VA | benign            |
| rs1048013 | NP_803882 | L | F | LF | benign            |
| rs1048032 | NP_872433 | H | P | HP | benign            |
| rs1048039 | NP_000163 | S | T | ST | benign            |
| rs1048039 | NP_653082 | S | T | ST | benign            |
| rs1048046 | NP_899056 | A | T | AT | benign            |
| rs1048047 | NP_899056 | Q | R | QR | benign            |
| rs1048050 | NP_899056 | D | E | DE | benign            |
| rs1048051 | NP_005390 | H | Y | HY | probably damaging |
| rs1048052 | NP_002113 | K | T | KT | benign            |
| rs1048054 | NP_899056 | Q | K | QK | benign            |
| rs1048063 | NP_002113 | G | S | GS | benign            |
| rs1048064 | NP_899056 | R | G | RG | probably damaging |
| rs1048081 | NP_001383 | A | E | AE | benign            |
| rs1048081 | NP_116761 | A | E | AE | benign            |
| rs1048081 | NP_116757 | A | E | AE | benign            |
| rs1048081 | NP_116760 | A | E | AE | benign            |
| rs1048081 | NP_001382 | A | E | AE | benign            |
| rs1048081 | NP_001381 | A | E | AE | benign            |
| rs1048089 | NP_002113 | N | T | NT | benign            |
| rs1048090 | NP_002113 | N | D | ND | benign            |
| rs1048092 | NP_004544 | H | P | HP | possibly damaging |
| rs1048094 | NP_000343 | V | A | VA | benign            |
| rs1048095 | NP_000343 | P | L | PL | possibly damaging |
| rs1048096 | NP_000343 | L | V | LV | benign            |
| rs1048098 | NP_000343 | L | F | LF | possibly damaging |
| rs1048101 | NP_150647 | C | R | CR | benign            |
| rs1048101 | NP_000671 | R | C | RC | benign            |
| rs1048101 | NP_150645 | R | C | RC | probably damaging |
| rs1048102 | NP_000671 | E | Q | EQ | benign            |
| rs1048105 | NP_004544 | H | P | HP | probably damaging |
| rs1048108 | NP_000456 | P | S | PS | possibly damaging |
| rs1048122 | NP_064440 | F | S | FS | possibly damaging |
| rs1048125 | NP_115866 | E | K | EK | benign            |
| rs1048127 | NP_001195 | G | R | GR | benign            |
| rs1048133 | NP_001280 | S | C | SC | probably damaging |
| rs1048135 | NP_004679 | S | L | SL | benign            |
| rs1048152 | NP_005203 | L | R | LR | possibly damaging |
| rs1048167 | NP_733792 | R | Q | RQ | benign            |
| rs1048167 | NP_115756 | R | Q | RQ | benign            |
| rs1048197 | NP_003071 | L | P | LP | benign            |
| rs1048201 | NP_932158 | R | Q | RQ | benign            |

|           |           |   |   |    |                   |
|-----------|-----------|---|---|----|-------------------|
| rs1048216 | NP_848642 | E | V | EV | possibly damaging |
| rs1048218 | NP_733930 | Q | H | QH | benign            |
| rs1048218 | NP_733931 | Q | H | QH | possibly damaging |
| rs1048218 | NP_733927 | Q | H | QH | possibly damaging |
| rs1048220 | NP_733930 | R | M | RM | benign            |
| rs1048220 | NP_733931 | R | M | RM | probably damaging |
| rs1048220 | NP_733927 | R | M | RM | probably damaging |
| rs1048221 | NP_733930 | R | L | RL | benign            |
| rs1048221 | NP_733931 | R | L | RL | probably damaging |
| rs1048221 | NP_733927 | R | L | RL | probably damaging |
| rs1048225 | NP_004517 | E | Q | EQ | benign            |
| rs1048236 | NP_003118 | T | I | TI | benign            |
| rs1048247 | XP_350781 | A | G | AG | benign            |
| rs1048247 | XP_495809 | G | A | GA | benign            |
| rs1048258 | NP_037492 | H | P | HP | probably damaging |
| rs1048270 | NP_006728 | D | E | DE | benign            |
| rs1048271 | NP_006728 | R | H | RH | benign            |
| rs1048289 | NP_987096 | D | N | DN | benign            |
| rs1048299 | NP_005524 | E | K | EK | benign            |
| rs1048309 | NP_006561 | P | L | PL | probably damaging |
| rs1048319 | NP_006289 | D | E | DE | benign            |
| rs1048323 | NP_005524 | S | F | SF | possibly damaging |
| rs1048328 | NP_659196 | R | C | RC | possibly damaging |
| rs1048328 | NP_006844 | R | C | RC | possibly damaging |
| rs1048347 | NP_653188 | H | P | HP | possibly damaging |
| rs1048356 | NP_955367 | P | L | PL | probably damaging |
| rs1048356 | NP_001456 | P | L | PL | probably damaging |
| rs1048369 | NP_001439 | A | V | AV | benign            |
| rs1048379 | NP_002762 | Y | C | YC | probably damaging |
| rs1048401 | NP_002044 | I | V | IV | benign            |
| rs1048404 | NP_002044 | T | A | TA | benign            |
| rs1048425 | NP_002044 | S | T | ST | possibly damaging |
| rs1048430 | NP_002113 | F | L | FL | benign            |
| rs1048443 | NP_002044 | G | A | GA | benign            |
| rs1048445 | NP_055994 | R | Q | RQ | benign            |
| rs1048457 | XP_375747 | T | I | TI | benign            |
| rs1048457 | NP_002044 | T | I | TI | benign            |
| rs1048481 | NP_055162 | K | M | KM | benign            |
| rs1048485 | NP_002044 | N | Y | NY | benign            |
| rs1048521 | NP_002567 | A | V | AV | benign            |
| rs1048522 | NP_002567 | R | L | RL | possibly damaging |
| rs1048597 | NP_536858 | L | V | LV | benign            |
| rs1048597 | NP_536859 | L | V | LV | benign            |
| rs1048597 | NP_002822 | L | V | LV | benign            |
| rs1048598 | NP_536858 | V | E | VE | benign            |
| rs1048598 | NP_536859 | V | E | VE | benign            |



|           |           |   |   |    |                   |
|-----------|-----------|---|---|----|-------------------|
| rs1048598 | NP_002822 | V | E | VE | benign            |
| rs1048621 | NP_536737 | R | C | RC | probably damaging |
| rs1048661 | NP_005567 | L | R | LR | possibly damaging |
| rs1048684 | NP_006345 | E | G | EG | possibly damaging |
| rs1048714 | NP_201569 | W | C | WC | benign            |
| rs1048714 | NP_201570 | W | C | WC | probably damaging |
| rs1048714 | NP_003663 | W | C | WC | probably damaging |
| rs1048755 | NP_109376 | V | M | VM | benign            |
| rs1048755 | NP_004984 | V | M | VM | benign            |
| rs1048779 | NP_055410 | G | R | GR | probably damaging |
| rs1048801 | NP_006838 | R | Q | RQ | benign            |
| rs1048803 | NP_003864 | D | E | DE | benign            |
| rs1048824 | NP_991331 | E | G | EG | benign            |
| rs1048824 | NP_006343 | E | G | EG | benign            |
| rs1048835 | XP_050564 | S | F | SF | benign            |
| rs1048846 | NP_004806 | L | V | LV | benign            |
| rs1048849 | NP_004806 | S | R | SR | benign            |
| rs1048850 | NP_004806 | D | G | DG | possibly damaging |
| rs1048886 | NP_660310 | Q | R | QR | benign            |
| rs1048889 | NP_076977 | P | L | PL | benign            |
| rs1048895 | NP_839952 | M | K | MK | probably damaging |
| rs1048895 | NP_006756 | M | K | MK | probably damaging |
| rs1048896 | NP_839952 | F | L | FL | probably damaging |
| rs1048896 | NP_006756 | F | L | FL | probably damaging |
| rs1048906 | NP_963906 | G | S | GS | benign            |
| rs1048923 | NP_006839 | A | T | AT | benign            |
| rs1048943 | NP_000490 | I | V | IV | benign            |
| rs1048944 | NP_056392 | A | S | AS | benign            |
| rs1048945 | NP_001632 | Q | H | QH | benign            |
| rs1048945 | NP_542379 | Q | H | QH | benign            |
| rs1048945 | NP_542380 | Q | H | QH | benign            |
| rs1048974 | NP_570901 | F | L | FL | benign            |
| rs1048988 | NP_001623 | R | P | RP | probably damaging |
| rs1048991 | NP_001623 | M | L | ML | benign            |
| rs1048992 | NP_001623 | R | L | RL | probably damaging |
| rs1048992 | NP_112603 | R | L | RL | probably damaging |
| rs1048993 | NP_001623 | Y | C | YC | benign            |
| rs1048993 | NP_112603 | Y | C | YC | benign            |
| rs1048994 | NP_001623 | E | G | EG | benign            |
| rs1048995 | NP_001623 | R | P | RP | benign            |
| rs1049015 | NP_003734 | Q | K | QK | benign            |
| rs1049015 | NP_671756 | Q | K | QK | benign            |
| rs1049015 | NP_671766 | Q | K | QK | benign            |
| rs1049016 | NP_003734 | N | K | NK | benign            |
| rs1049016 | NP_671756 | N | K | NK | benign            |
| rs1049016 | NP_671766 | N | K | NK | benign            |

|           |           |   |   |    |                   |
|-----------|-----------|---|---|----|-------------------|
| rs1049018 | NP_003734 | S | P | SP | benign            |
| rs1049018 | NP_671756 | S | P | SP | benign            |
| rs1049018 | NP_671766 | S | P | SP | benign            |
| rs1049020 | NP_003734 | I | T | IT | benign            |
| rs1049020 | NP_671756 | I | T | IT | benign            |
| rs1049020 | NP_671766 | I | T | IT | benign            |
| rs1049021 | NP_003734 | E | A | EA | benign            |
| rs1049021 | NP_671756 | E | A | EA | benign            |
| rs1049021 | NP_671766 | E | A | EA | benign            |
| rs1049025 | NP_003734 | P | A | PA | benign            |
| rs1049025 | NP_671756 | P | A | PA | benign            |
| rs1049025 | NP_671766 | P | A | PA | benign            |
| rs1049032 | NP_003734 | S | F | SF | benign            |
| rs1049032 | NP_671756 | S | F | SF | benign            |
| rs1049032 | NP_671766 | S | F | SF | benign            |
| rs1049038 | NP_003734 | M | T | MT | benign            |
| rs1049038 | NP_671756 | M | T | MT | benign            |
| rs1049038 | NP_671766 | M | T | MT | benign            |
| rs1049080 | NP_002011 | D | E | DE | benign            |
| rs1049080 | NP_891555 | E | D | ED | benign            |
| rs1049089 | NP_004153 | R | G | RG | probably damaging |
| rs1049090 | NP_003984 | A | V | AV | benign            |
| rs1049110 | NP_872355 | Q | R | QR | benign            |
| rs1049125 | NP_006220 | L | P | LP | probably damaging |
| rs1049150 | XP_498425 | I | L | IL | benign            |
| rs1049150 | NP_037421 | L | I | LI | benign            |
| rs1049168 | NP_003414 | C | Y | CY | probably damaging |
| rs1049202 | NP_055033 | P | L | PL | benign            |
| rs1049202 | NP_055327 | P | L | PL | benign            |
| rs1049205 | NP_002696 | R | Q | RQ | benign            |
| rs1049210 | NP_116786 | E | D | ED | benign            |
| rs1049210 | NP_004337 | E | D | ED | benign            |
| rs1049215 | XP_498425 | G | R | GR | benign            |
| rs1049215 | NP_037421 | R | G | RG | benign            |
| rs1049227 | NP_001279 | Q | E | QE | possibly damaging |
| rs1049234 | NP_008821 | E | Q | EQ | benign            |
| rs1049254 | NP_000092 | A | V | AV | benign            |
| rs1049258 | XP_496348 | E | G | EG | possibly damaging |
| rs1049262 | NP_003303 | G | S | GS | possibly damaging |
| rs1049267 | NP_056952 | H | R | HR | benign            |
| rs1049267 | NP_055326 | H | R | HR | benign            |
| rs1049270 | NP_003303 | E | G | EG | probably damaging |
| rs1049287 | NP_055327 | L | Q | LQ | benign            |
| rs1049289 | NP_055094 | S | F | SF | possibly damaging |
| rs1049296 | NP_001054 | P | S | PS | benign            |
| rs1049299 | XP_496169 | T | S | TS | benign            |

|           |           |   |   |    |                   |
|-----------|-----------|---|---|----|-------------------|
| rs1049306 | NP_003468 | R | C | RC | probably damaging |
| rs1049311 | NP_003468 | A | S | AS | benign            |
| rs1049324 | NP_001531 | V | F | VF | benign            |
| rs1049345 | NP_001531 | G | A | GA | benign            |
| rs1049367 | NP_006570 | T | A | TA | benign            |
| rs1049389 | NP_006570 | D | N | DN | benign            |
| rs1049407 | NP_001267 | T | I | TI | benign            |
| rs1049413 | NP_002994 | M | T | MT | probably damaging |
| rs1049415 | NP_002994 | M | I | MI | possibly damaging |
| rs1049416 | NP_002994 | V | M | VM | benign            |
| rs1049418 | NP_002994 | I | V | IV | benign            |
| rs1049422 | NP_002994 | A | G | AG | benign            |
| rs1049423 | NP_002994 | Y | H | YH | benign            |
| rs1049434 | NP_003042 | E | D | ED | benign            |
| rs1049453 | NP_055580 | V | A | VA | benign            |
| rs1049455 | NP_004732 | S | P | SP | benign            |
| rs1049472 | NP_001558 | G | A | GA | benign            |
| rs1049475 | XP_497127 | P | L | PL | probably damaging |
| rs1049486 | NP_001562 | E | K | EK | benign            |
| rs1049487 | NP_006508 | V | I | VI | benign            |
| rs1049491 | NP_001473 | I | V | IV | benign            |
| rs1049501 | NP_690039 | S | Y | SY | possibly damaging |
| rs1049501 | NP_003090 | S | Y | SY | possibly damaging |
| rs1049515 | NP_002625 | G | E | GE | probably damaging |
| rs1049516 | XP_045792 | A | S | AS | benign            |
| rs1049534 | NP_003669 | I | V | IV | benign            |
| rs1049544 | NP_004675 | H | D | HD | possibly damaging |
| rs1049550 | NP_665876 | R | C | RC | benign            |
| rs1049564 | NP_000261 | S | G | SG | benign            |
| rs1049573 | NP_000292 | I | R | IR | benign            |
| rs1049589 | NP_009133 | V | M | VM | benign            |
| rs1049590 | NP_009133 | L | P | LP | benign            |
| rs1049604 | NP_002739 | E | K | EK | benign            |
| rs1049605 | NP_002739 | R | C | RC | benign            |
| rs1049617 | NP_004582 | V | M | VM | benign            |
| rs1049619 | NP_003322 | A | V | AV | benign            |
| rs1049621 | NP_001945 | L | V | LV | benign            |
| rs1049624 | NP_963923 | K | N | KN | benign            |
| rs1049624 | NP_004808 | K | N | KN | benign            |
| rs1049625 | NP_963923 | N | D | ND | benign            |
| rs1049625 | NP_004808 | N | D | ND | benign            |
| rs1049626 | NP_963923 | K | N | KN | benign            |
| rs1049626 | NP_004808 | K | N | KN | benign            |
| rs1049627 | NP_963923 | Q | H | QH | benign            |
| rs1049627 | NP_004808 | Q | H | QH | benign            |
| rs1049674 | NP_001664 | E | V | EV | benign            |

|           |           |   |   |    |                   |
|-----------|-----------|---|---|----|-------------------|
| rs1049674 | NP_597680 | E | V | EV | benign            |
| rs1049674 | NP_899199 | E | V | EV | benign            |
| rs1049682 | NP_036321 | K | R | KR | benign            |
| rs1049682 | NP_722452 | K | R | KR | benign            |
| rs1049683 | NP_036321 | S | A | SA | benign            |
| rs1049683 | NP_722452 | S | A | SA | benign            |
| rs1049721 | NP_000312 | I | V | IV | benign            |
| rs1049731 | NP_038473 | A | P | AP | benign            |
| rs1049731 | NP_000808 | A | P | AP | benign            |
| rs1049736 | NP_000808 | F | L | FL | probably damaging |
| rs1049742 | NP_001082 | S | F | SF | possibly damaging |
| rs1049756 | NP_567824 | G | A | GA | benign            |
| rs1049756 | NP_569120 | G | A | GA | benign            |
| rs1049756 | NP_569122 | G | A | GA | benign            |
| rs1049756 | NP_001387 | G | A | GA | benign            |
| rs1049760 | NP_567824 | N | S | NS | benign            |
| rs1049760 | NP_569120 | N | S | NS | benign            |
| rs1049760 | NP_569122 | N | S | NS | benign            |
| rs1049760 | NP_001387 | N | S | NS | benign            |
| rs1049763 | NP_567824 | S | P | SP | benign            |
| rs1049763 | NP_569120 | S | P | SP | benign            |
| rs1049763 | NP_569122 | S | P | SP | benign            |
| rs1049763 | NP_001387 | S | P | SP | benign            |
| rs1049768 | NP_567824 | Q | R | QR | benign            |
| rs1049768 | NP_569120 | Q | R | QR | benign            |
| rs1049768 | NP_569122 | Q | R | QR | benign            |
| rs1049768 | NP_001387 | Q | R | QR | benign            |
| rs1049793 | NP_001082 | H | D | HD | possibly damaging |
| rs1049797 | NP_899236 | A | V | AV | benign            |
| rs1049797 | NP_056363 | A | V | AV | benign            |
| rs1049798 | NP_003239 | V | G | VG | probably damaging |
| rs1049820 | NP_963886 | V | L | VL | benign            |
| rs1049820 | NP_963885 | V | L | VL | benign            |
| rs1049829 | NP_002406 | L | F | LF | possibly damaging |
| rs1049843 | NP_476500 | G | S | GS | possibly damaging |
| rs1049850 | NP_001531 | Q | K | QK | possibly damaging |
| rs1049854 | NP_004554 | R | S | RS | possibly damaging |
| rs1049856 | NP_001089 | A | D | AD | benign            |
| rs1049874 | NP_004306 | V | I | VI | benign            |
| rs1049874 | NP_808592 | V | I | VI | benign            |
| rs1049925 | NP_004417 | T | A | TA | benign            |
| rs1049932 | NP_003123 | V | L | VL | benign            |
| rs1049934 | NP_001969 | Q | P | QP | possibly damaging |
| rs1049935 | NP_001969 | Q | H | QH | possibly damaging |
| rs1049948 | NP_004417 | R | H | RH | benign            |
| rs1049948 | XP_208080 | R | H | RH | benign            |

|           |           |   |   |    |                   |
|-----------|-----------|---|---|----|-------------------|
| rs1049967 | NP_004355 | A | S | AS | benign            |
| rs1049968 | NP_000772 | M | I | MI | benign            |
| rs1049970 | NP_001786 | T | I | TI | benign            |
| rs1049981 | NP_000680 | N | S | NS | benign            |
| rs1050004 | NP_000867 | R | H | RH | benign            |
| rs1050005 | NP_000867 | A | G | AG | possibly damaging |
| rs1050043 | NP_001771 | R | K | RK | benign            |
| rs1050062 | NP_006834 | A | S | AS | benign            |
| rs1050073 | NP_003764 | S | A | SA | benign            |
| rs1050073 | NP_149348 | S | A | SA | benign            |
| rs1050074 | NP_003764 | R | L | RL | benign            |
| rs1050074 | NP_149348 | R | L | RL | benign            |
| rs1050081 | XP_374949 | D | E | DE | benign            |
| rs1050086 | NP_000345 | D | N | DN | benign            |
| rs1050090 | NP_004384 | A | T | AT | benign            |
| rs1050099 | NP_003069 | V | E | VE | benign            |
| rs1050100 | NP_003069 | R | G | RG | probably damaging |
| rs1050101 | NP_003069 | P | S | PS | benign            |
| rs1050110 | NP_006428 | A | G | AG | benign            |
| rs1050112 | NP_006428 | T | P | TP | benign            |
| rs1050114 | NP_006428 | T | A | TA | benign            |
| rs1050143 | NP_000851 | D | H | DH | probably damaging |
| rs1050150 | NP_003050 | L | V | LV | benign            |
| rs1050152 | NP_003050 | L | F | LF | benign            |
| rs1050159 | NP_005262 | A | V | AV | benign            |
| rs1050160 | NP_005262 | R | Q | RQ | benign            |
| rs1050164 | NP_004643 | R | K | RK | benign            |
| rs1050164 | NP_068706 | R | K | RK | benign            |
| rs1050165 | NP_004643 | F | L | FL | benign            |
| rs1050165 | NP_068706 | F | L | FL | benign            |
| rs1050182 | NP_006752 | K | T | KT | probably damaging |
| rs1050184 | NP_005013 | H | P | HP | benign            |
| rs1050207 | NP_006160 | T | P | TP | possibly damaging |
| rs1050208 | NP_000557 | I | T | IT | possibly damaging |
| rs1050214 | NP_001294 | G | D | GD | possibly damaging |
| rs1050215 | NP_001294 | Y | H | YH | possibly damaging |
| rs1050217 | NP_001196 | K | N | KN | benign            |
| rs1050217 | NP_053583 | K | N | KN | benign            |
| rs1050217 | NP_053582 | K | N | KN | benign            |
| rs1050217 | NP_053581 | K | N | KN | possibly damaging |
| rs1050237 | NP_003063 | R | P | RP | benign            |
| rs1050246 | NP_002100 | L | V | LV | benign            |
| rs1050250 | NP_002100 | I | V | IV | benign            |
| rs1050281 | NP_778255 | V | M | VM | benign            |
| rs1050281 | NP_002552 | V | M | VM | benign            |
| rs1050311 | NP_005960 | Y | C | YC | probably damaging |

|           |           |   |   |    |                   |
|-----------|-----------|---|---|----|-------------------|
| rs1050312 | NP_005960 | T | A | TA | possibly damaging |
| rs1050329 | NP_056937 | S | F | SF | possibly damaging |
| rs1050341 | NP_005505 | I | L | IL | benign            |
| rs1050342 | NP_000603 | P | Q | PQ | possibly damaging |
| rs1050348 | NP_002281 | H | Y | HY | possibly damaging |
| rs1050349 | NP_002281 | R | P | RP | benign            |
| rs1050354 | NP_004783 | D | E | DE | benign            |
| rs1050357 | NP_002118 | E | K | EK | benign            |
| rs1050368 | NP_005505 | T | K | TK | benign            |
| rs1050379 | NP_005505 | H | Y | HY | benign            |
| rs1050381 | NP_008818 | A | S | AS | benign            |
| rs1050383 | NP_056937 | H | P | HP | probably damaging |
| rs1050388 | NP_005505 | S | N | SN | benign            |
| rs1050410 | NP_938206 | A | T | AT | benign            |
| rs1050413 | NP_872634 | S | N | SN | benign            |
| rs1050413 | NP_872633 | S | N | SN | benign            |
| rs1050415 | NP_872634 | H | Q | HQ | possibly damaging |
| rs1050415 | NP_872633 | H | Q | HQ | possibly damaging |
| rs1050416 | NP_872634 | F | Y | FY | benign            |
| rs1050416 | NP_872633 | F | Y | FY | benign            |
| rs1050418 | NP_872634 | L | I | LI | benign            |
| rs1050418 | NP_872633 | L | I | LI | benign            |
| rs1050430 | NP_872634 | L | F | LF | benign            |
| rs1050430 | NP_872633 | L | F | LF | benign            |
| rs1050435 | NP_005144 | K | R | KR | benign            |
| rs1050437 | NP_002118 | R | H | RH | benign            |
| rs1050450 | NP_000572 | P | L | PL | benign            |
| rs1050455 | NP_005505 | T | A | TA | benign            |
| rs1050457 | NP_002570 | A | T | AT | benign            |
| rs1050458 | NP_005505 | M | T | MT | benign            |
| rs1050459 | NP_005505 | A | E | AE | benign            |
| rs1050462 | NP_005505 | V | L | VL | benign            |
| rs1050470 | NP_066299 | T | P | TP | probably damaging |
| rs1050470 | NP_524148 | T | P | TP | probably damaging |
| rs1050470 | NP_524147 | T | P | TP | probably damaging |
| rs1050477 | NP_003735 | T | N | TN | possibly damaging |
| rs1050478 | NP_003735 | A | T | AT | benign            |
| rs1050479 | NP_003735 | A | D | AD | benign            |
| rs1050486 | NP_005505 | V | M | VM | benign            |
| rs1050499 | NP_003992 | F | Y | FY | benign            |
| rs1050499 | NP_963857 | Y | F | YF | benign            |
| rs1050501 | NP_003992 | I | T | IT | benign            |
| rs1050501 | NP_963857 | I | T | IT | benign            |
| rs1050525 | NP_872590 | S | R | SR | possibly damaging |
| rs1050529 | NP_005505 | A | T | AT | benign            |
| rs1050531 | NP_001669 | F | L | FL | possibly damaging |

|           |           |   |   |    |                   |
|-----------|-----------|---|---|----|-------------------|
| rs1050538 | NP_005505 | E | A | EA | benign            |
| rs1050555 | NP_002558 | H | N | HN | benign            |
| rs1050558 | XP_497846 | V | A | VA | benign            |
| rs1050560 | NP_036212 | L | F | LF | benign            |
| rs1050565 | NP_000377 | I | V | IV | benign            |
| rs1050574 | NP_852092 | M | T | MT | probably damaging |
| rs1050574 | NP_057738 | M | T | MT | probably damaging |
| rs1050574 | NP_002032 | M | T | MT | probably damaging |
| rs1050574 | NP_057739 | M | T | MT | probably damaging |
| rs1050574 | NP_005245 | M | T | MT | probably damaging |
| rs1050577 | NP_620581 | R | S | RS | benign            |
| rs1050577 | NP_620582 | R | S | RS | benign            |
| rs1050577 | NP_620583 | R | S | RS | benign            |
| rs1050578 | NP_620581 | G | R | GR | benign            |
| rs1050578 | NP_620582 | G | R | GR | benign            |
| rs1050578 | NP_620583 | G | R | GR | possibly damaging |
| rs1050580 | NP_620581 | E | D | ED | benign            |
| rs1050580 | NP_620582 | E | D | ED | benign            |
| rs1050609 | NP_037538 | A | G | AG | benign            |
| rs1050609 | NP_037539 | A | G | AG | benign            |
| rs1050609 | NP_001921 | A | G | AG | benign            |
| rs1050622 | NP_000430 | S | G | SG | benign            |
| rs1050625 | NP_002558 | H | Y | HY | probably damaging |
| rs1050636 | NP_000662 | Y | D | YD | benign            |
| rs1050637 | NP_000662 | L | F | LF | benign            |
| rs1050654 | NP_005505 | R | S | RS | benign            |
| rs1050665 | NP_055207 | Q | K | QK | benign            |
| rs1050678 | NP_072043 | C | W | CW | probably damaging |
| rs1050683 | NP_005505 | A | T | AT | benign            |
| rs1050692 | NP_005505 | W | S | WS | possibly damaging |
| rs1050701 | NP_003031 | D | G | DG | possibly damaging |
| rs1050703 | NP_003031 | L | V | LV | benign            |
| rs1050708 | NP_002796 | D | N | DN | possibly damaging |
| rs1050710 | NP_006150 | P | L | PL | probably damaging |
| rs1050723 | NP_005505 | A | V | AV | benign            |
| rs1050740 | NP_002796 | I | M | IM | possibly damaging |
| rs1050741 | NP_002508 | A | V | AV | benign            |
| rs1050750 | NP_036461 | A | V | AV | benign            |
| rs1050753 | NP_001323 | V | A | VA | benign            |
| rs1050762 | NP_003678 | V | E | VE | possibly damaging |
| rs1050767 | NP_002408 | T | P | TP | benign            |
| rs1050768 | NP_002408 | F | I | FI | benign            |
| rs1050777 | NP_000120 | L | F | LF | possibly damaging |
| rs1050784 | NP_002266 | T | A | TA | benign            |
| rs1050788 | NP_068578 | C | W | CW | probably damaging |
| rs1050805 | NP_003678 | R | C | RC | probably damaging |

|           |           |   |   |    |                   |
|-----------|-----------|---|---|----|-------------------|
| rs1050807 | NP_004644 | V | L | VL | benign            |
| rs1050808 | NP_004644 | S | F | SF | possibly damaging |
| rs1050825 | NP_001704 | G | C | GC | benign            |
| rs1050827 | NP_000393 | Q | H | QH | possibly damaging |
| rs1050828 | NP_000393 | V | M | VM | benign            |
| rs1050829 | NP_000393 | D | N | DN | benign            |
| rs1050833 | NP_003233 | A | V | AV | benign            |
| rs1050869 | NP_006216 | D | G | DG | possibly damaging |
| rs1050872 | NP_006112 | Y | N | YN | possibly damaging |
| rs1050896 | NP_002299 | R | K | RK | benign            |
| rs1050896 | NP_033665 | K | R | KR | probably damaging |
| rs1050901 | NP_004416 | G | R | GR | possibly damaging |
| rs1050901 | NP_073155 | G | R | GR | possibly damaging |
| rs1050904 | NP_004416 | S | F | SF | benign            |
| rs1050904 | NP_073155 | S | F | SF | benign            |
| rs1050906 | NP_008825 | I | M | IM | possibly damaging |
| rs1050914 | NP_620279 | V | F | VF | benign            |
| rs1050914 | NP_000147 | V | F | VF | benign            |
| rs1050916 | NP_000703 | Q | R | QR | benign            |
| rs1050930 | NP_004571 | T | S | TS | benign            |
| rs1050930 | NP_899057 | T | S | TS | benign            |
| rs1050930 | NP_899058 | T | S | TS | benign            |
| rs1050930 | NP_899059 | T | S | TS | benign            |
| rs1050942 | NP_006552 | H | D | HD | probably damaging |
| rs1050968 | NP_000266 | D | A | DA | benign            |
| rs1050971 | NP_444284 | N | D | ND | possibly damaging |
| rs1050972 | NP_002451 | H | Q | HQ | possibly damaging |
| rs1050973 | NP_002451 | N | K | NK | benign            |
| rs1050974 | NP_002451 | T | R | TR | possibly damaging |
| rs1050994 | NP_058132 | D | N | DN | benign            |
| rs1050994 | NP_002525 | N | D | ND | benign            |
| rs1050995 | NP_002525 | F | L | FL | benign            |
| rs1050995 | NP_058132 | L | F | LF | benign            |
| rs1050998 | NP_071342 | T | I | TI | benign            |
| rs1051006 | NP_569827 | M | V | MV | benign            |
| rs1051006 | NP_569828 | M | V | MV | benign            |
| rs1051006 | NP_569829 | M | V | MV | benign            |
| rs1051006 | NP_569830 | M | V | MV | benign            |
| rs1051006 | NP_003673 | M | V | MV | benign            |
| rs1051006 | NP_569826 | M | V | MV | benign            |
| rs1051006 | NP_569832 | V | M | VM | benign            |
| rs1051006 | NP_569831 | V | M | VM | benign            |
| rs1051041 | NP_115558 | G | C | GC | possibly damaging |
| rs1051061 | NP_006287 | V | I | VI | benign            |
| rs1051068 | NP_031387 | G | W | GW | benign            |
| rs1051080 | NP_005078 | N | D | ND | benign            |



|           |           |   |   |    |                   |
|-----------|-----------|---|---|----|-------------------|
| rs1051082 | NP_006742 | V | I | VI | benign            |
| rs1051086 | NP_001846 | V | D | VD | benign            |
| rs1051113 | XP_498129 | M | V | MV | benign            |
| rs1051130 | NP_001751 | S | A | SA | benign            |
| rs1051152 | NP_005325 | P | S | PS | probably damaging |
| rs1051168 | NP_066563 | P | T | PT | benign            |
| rs1051168 | NP_995580 | P | T | PT | benign            |
| rs1051180 | NP_001610 | H | R | HR | possibly damaging |
| rs1051191 | XP_496323 | M | L | ML | benign            |
| rs1051193 | NP_005056 | V | I | VI | benign            |
| rs1051195 | NP_004595 | E | D | ED | benign            |
| rs1051198 | NP_001763 | L | V | LV | benign            |
| rs1051199 | NP_001763 | S | R | SR | benign            |
| rs1051207 | NP_004583 | L | Q | LQ | benign            |
| rs1051207 | NP_689421 | L | Q | LQ | benign            |
| rs1051210 | NP_689508 | A | V | AV | benign            |
| rs1051213 | NP_689508 | T | I | TI | probably damaging |
| rs1051221 | XP_035825 | N | D | ND | benign            |
| rs1051231 | NP_001433 | T | P | TP | possibly damaging |
| rs1051235 | NP_006861 | A | V | AV | benign            |
| rs1051250 | NP_008936 | S | P | SP | benign            |
| rs1051258 | NP_006371 | F | L | FL | benign            |
| rs1051259 | NP_006371 | K | R | KR | benign            |
| rs1051261 | NP_006371 | S | C | SC | benign            |
| rs1051264 | NP_006371 | N | K | NK | benign            |
| rs1051266 | NP_919231 | H | R | HR | possibly damaging |
| rs1051268 | NP_570824 | D | N | DN | benign            |
| rs1051270 | NP_570824 | Q | H | QH | benign            |
| rs1051276 | NP_570824 | T | K | TK | benign            |
| rs1051281 | NP_570824 | F | C | FC | possibly damaging |
| rs1051309 | NP_065741 | G | S | GS | benign            |
| rs1051309 | NP_060217 | G | S | GS | benign            |
| rs1051314 | NP_004583 | L | F | LF | benign            |
| rs1051334 | NP_004607 | S | A | SA | benign            |
| rs1051338 | NP_000226 | P | T | PT | benign            |
| rs1051345 | NP_000710 | Q | R | QR | benign            |
| rs1051346 | NP_000710 | W | L | WL | possibly damaging |
| rs1051348 | NP_000710 | I | V | IV | benign            |
| rs1051350 | NP_000710 | I | M | IM | benign            |
| rs1051352 | NP_000710 | T | R | TR | possibly damaging |
| rs1051355 | NP_000710 | I | V | IV | benign            |
| rs1051356 | NP_000710 | I | L | IL | benign            |
| rs1051396 | NP_009166 | E | D | ED | benign            |
| rs1051430 | NP_000203 | A | V | AV | benign            |
| rs1051433 | NP_000836 | N | I | NI | probably damaging |
| rs1051447 | NP_079363 | N | H | NH | probably damaging |

|           |           |   |   |    |                   |
|-----------|-----------|---|---|----|-------------------|
| rs1051454 | NP_002246 | T | A | TA | benign            |
| rs1051456 | NP_002246 | A | P | AP | benign            |
| rs1051460 | NP_002246 | N | H | NH | benign            |
| rs1051465 | NP_115602 | R | K | RK | benign            |
| rs1051471 | NP_054720 | S | P | SP | benign            |
| rs1051471 | NP_619525 | S | P | SP | benign            |
| rs1051484 | NP_002717 | V | I | VI | benign            |
| rs1051486 | NP_000204 | T | S | TS | benign            |
| rs1051488 | NP_005505 | A | T | AT | benign            |
| rs1051489 | NP_057191 | I | T | IT | benign            |
| rs1051519 | NP_005318 | H | Q | HQ | possibly damaging |
| rs1051521 | NP_002510 | M | L | ML | benign            |
| rs1051522 | NP_002510 | I | V | IV | benign            |
| rs1051524 | NP_002510 | A | V | AV | benign            |
| rs1051525 | NP_002510 | R | Q | RQ | benign            |
| rs1051532 | XP_370856 | R | Q | RQ | benign            |
| rs1051558 | NP_665683 | F | S | FS | probably damaging |
| rs1051566 | NP_665683 | A | T | AT | benign            |
| rs1051573 | NP_665683 | A | V | AV | benign            |
| rs1051577 | NP_005283 | L | I | LI | benign            |
| rs1051578 | NP_665683 | T | I | TI | probably damaging |
| rs1051588 | NP_523352 | S | C | SC | possibly damaging |
| rs1051588 | NP_523353 | S | C | SC | possibly damaging |
| rs1051588 | NP_523354 | S | C | SC | possibly damaging |
| rs1051590 | NP_523352 | I | V | IV | benign            |
| rs1051590 | NP_523353 | I | V | IV | benign            |
| rs1051590 | NP_523354 | I | V | IV | benign            |
| rs1051590 | NP_006791 | I | V | IV | benign            |
| rs1051591 | NP_523352 | I | L | IL | benign            |
| rs1051591 | NP_523353 | I | L | IL | benign            |
| rs1051591 | NP_523354 | I | L | IL | benign            |
| rs1051591 | NP_006791 | I | L | IL | benign            |
| rs1051592 | NP_523352 | K | R | KR | benign            |
| rs1051592 | NP_523353 | K | R | KR | benign            |
| rs1051592 | NP_523354 | K | R | KR | benign            |
| rs1051592 | NP_006791 | K | R | KR | benign            |
| rs1051595 | XP_087225 | Q | K | QK | benign            |
| rs1051596 | XP_087225 | H | Q | HQ | possibly damaging |
| rs1051597 | NP_523352 | N | S | NS | benign            |
| rs1051597 | NP_523353 | N | S | NS | benign            |
| rs1051597 | NP_523354 | N | S | NS | benign            |
| rs1051597 | NP_006791 | N | S | NS | benign            |
| rs1051599 | NP_523352 | N | S | NS | benign            |
| rs1051599 | NP_523353 | N | S | NS | benign            |
| rs1051599 | NP_523354 | N | S | NS | benign            |
| rs1051599 | NP_006791 | N | S | NS | benign            |

|           |           |   |   |    |                   |
|-----------|-----------|---|---|----|-------------------|
| rs1051612 | NP_000297 | Q | R | QR | possibly damaging |
| rs1051616 | NP_066399 | T | P | TP | possibly damaging |
| rs1051616 | NP_066400 | T | P | TP | possibly damaging |
| rs1051616 | NP_000539 | T | P | TP | possibly damaging |
| rs1051621 | NP_066399 | R | S | RS | benign            |
| rs1051621 | NP_066400 | R | S | RS | benign            |
| rs1051621 | NP_000539 | R | S | RS | benign            |
| rs1051623 | NP_004054 | E | D | ED | benign            |
| rs1051624 | NP_004054 | E | A | EA | benign            |
| rs1051625 | NP_003777 | L | V | LV | benign            |
| rs1051675 | NP_006400 | P | T | PT | probably damaging |
| rs1051676 | NP_001785 | A | V | AV | benign            |
| rs1051678 | NP_612114 | S | P | SP | possibly damaging |
| rs1051678 | NP_612115 | S | P | SP | possibly damaging |
| rs1051678 | NP_000480 | S | P | SP | possibly damaging |
| rs1051680 | NP_612114 | E | G | EG | possibly damaging |
| rs1051680 | NP_612115 | E | G | EG | possibly damaging |
| rs1051680 | NP_000480 | E | G | EG | possibly damaging |
| rs1051691 | NP_000199 | T | I | TI | probably damaging |
| rs1051692 | NP_000199 | H | Y | HY | benign            |
| rs1051695 | NP_004265 | N | D | ND | benign            |
| rs1051701 | NP_000009 | A | S | AS | benign            |
| rs1051704 | NP_071504 | S | A | SA | benign            |
| rs1051704 | NP_000911 | S | A | SA | benign            |
| rs1051715 | NP_689926 | A | G | AG | possibly damaging |
| rs1051727 | NP_002837 | S | L | SL | possibly damaging |
| rs1051733 | NP_665683 | V | L | VL | benign            |
| rs1051738 | NP_006193 | A | E | AE | benign            |
| rs1051739 | NP_665683 | C | S | CS | benign            |
| rs1051740 | NP_000111 | Y | H | YH | possibly damaging |
| rs1051744 | NP_000481 | G | V | GV | benign            |
| rs1051745 | NP_665683 | P | Q | PQ | benign            |
| rs1051751 | NP_003382 | C | F | CF | probably damaging |
| rs1051757 | NP_665683 | K | Q | KQ | benign            |
| rs1051763 | NP_008932 | S | A | SA | benign            |
| rs1051770 | NP_008958 | H | N | HN | probably damaging |
| rs1051773 | NP_665683 | K | Q | KQ | benign            |
| rs1051776 | NP_006401 | F | L | FL | benign            |
| rs1051777 | NP_665683 | I | L | IL | benign            |
| rs1051778 | NP_665683 | I | T | IT | benign            |
| rs1051788 | NP_005922 | N | D | ND | benign            |
| rs1051789 | NP_005932 | Y | H | YH | probably damaging |
| rs1051808 | NP_112594 | R | Q | RQ | benign            |
| rs1051822 | NP_006396 | V | D | VD | possibly damaging |
| rs1051841 | NP_000258 | M | I | MI | benign            |
| rs1051852 | NP_783163 | S | R | SR | benign            |

|           |           |   |   |    |                   |
|-----------|-----------|---|---|----|-------------------|
| rs1051858 | NP_002883 | T | A | TA | benign            |
| rs1051858 | NP_075376 | T | A | TA | benign            |
| rs1051858 | NP_075377 | T | A | TA | benign            |
| rs1051882 | NP_003385 | G | D | GD | benign            |
| rs1051885 | NP_061894 | S | N | SN | benign            |
| rs1051887 | NP_000316 | E | Q | EQ | benign            |
| rs1051887 | NP_700475 | E | Q | EQ | benign            |
| rs1051887 | NP_700476 | E | Q | EQ | possibly damaging |
| rs1051890 | NP_061894 | D | N | DN | benign            |
| rs1051911 | NP_001179 | R | H | RH | possibly damaging |
| rs1051912 | NP_001179 | V | A | VA | benign            |
| rs1051925 | NP_006195 | Q | R | QR | benign            |
| rs1051931 | NP_005075 | A | V | AV | possibly damaging |
| rs1051932 | NP_008829 | S | C | SC | possibly damaging |
| rs1051933 | NP_001444 | N | D | ND | benign            |
| rs1051935 | NP_004830 | D | E | DE | benign            |
| rs1051935 | NP_955363 | D | E | DE | benign            |
| rs1051935 | NP_955364 | D | E | DE | benign            |
| rs1051936 | NP_004830 | H | Q | HQ | benign            |
| rs1051936 | NP_955363 | H | Q | HQ | benign            |
| rs1051936 | NP_955364 | H | Q | HQ | benign            |
| rs1051969 | NP_003265 | Y | D | YD | probably damaging |
| rs1051976 | NP_057706 | V | A | VA | benign            |
| rs1051976 | NP_663619 | V | A | VA | benign            |
| rs1051983 | NP_665683 | A | S | AS | benign            |
| rs1051992 | NP_659477 | L | P | LP | probably damaging |
| rs1052019 | NP_004786 | F | V | FV | possibly damaging |
| rs1052019 | NP_710150 | F | V | FV | possibly damaging |
| rs1052030 | NP_000251 | L | S | LS | possibly damaging |
| rs1052031 | NP_000251 | F | L | FL | benign            |
| rs1052032 | NP_000251 | R | Q | RQ | benign            |
| rs1052042 | NP_758957 | G | R | GR | possibly damaging |
| rs1052053 | NP_009152 | R | Q | RQ | possibly damaging |
| rs1052056 | NP_060687 | L | F | LF | benign            |
| rs1052065 | NP_057706 | Y | C | YC | probably damaging |
| rs1052067 | NP_009152 | I | M | IM | benign            |
| rs1052068 | NP_115751 | A | V | AV | benign            |
| rs1052133 | NP_058213 | P | A | PA | benign            |
| rs1052133 | NP_002533 | S | C | SC | benign            |
| rs1052134 | NP_058213 | P | R | PR | benign            |
| rs1052141 | NP_003204 | A | G | AG | benign            |
| rs1052141 | NP_958849 | A | G | AG | benign            |
| rs1052157 | NP_006405 | D | E | DE | benign            |
| rs1052157 | NP_892117 | E | D | ED | benign            |
| rs1052166 | NP_008859 | L | P | LP | benign            |
| rs1052180 | NP_061905 | P | L | PL | probably damaging |

|           |           |   |   |    |                   |
|-----------|-----------|---|---|----|-------------------|
| rs1052182 | NP_008882 | A | T | AT | benign            |
| rs1052183 | NP_008882 | F | L | FL | possibly damaging |
| rs1052184 | NP_008882 | P | S | PS | probably damaging |
| rs1052195 | NP_000135 | S | C | SC | possibly damaging |
| rs1052200 | NP_061902 | R | H | RH | possibly damaging |
| rs1052200 | NP_112601 | R | H | RH | possibly damaging |
| rs1052201 | NP_000135 | Y | F | YF | benign            |
| rs1052208 | NP_055937 | V | A | VA | benign            |
| rs1052243 | XP_372205 | T | M | TM | benign            |
| rs1052252 | XP_372205 | P | T | PT | probably damaging |
| rs1052275 | NP_113671 | T | I | TI | possibly damaging |
| rs1052276 | XP_375358 | V | I | VI | benign            |
| rs1052325 | NP_689983 | I | V | IV | benign            |
| rs1052366 | XP_372224 | T | A | TA | benign            |
| rs1052420 | XP_166138 | Q | R | QR | benign            |
| rs1052421 | NP_997195 | V | D | VD | probably damaging |
| rs1052422 | NP_997195 | W | R | WR | probably damaging |
| rs1052471 | NP_002682 | H | Y | HY | probably damaging |
| rs1052486 | NP_542434 | S | P | SP | benign            |
| rs1052486 | NP_004630 | P | S | PS | possibly damaging |
| rs1052492 | XP_088331 | R | Q | RQ | benign            |
| rs1052500 | XP_496588 | K | R | KR | benign            |
| rs1052510 | NP_055396 | H | R | HR | benign            |
| rs1052512 | NP_055396 | H | R | HR | benign            |
| rs1052515 | NP_055396 | R | H | RH | possibly damaging |
| rs1052526 | NP_000206 | D | H | DH | probably damaging |
| rs1052538 | NP_015564 | F | L | FL | benign            |
| rs1052538 | NP_000819 | F | L | FL | benign            |
| rs1052540 | NP_000819 | N | S | NS | benign            |
| rs1052542 | NP_000819 | L | I | LI | benign            |
| rs1052552 | NP_005927 | V | G | VG | probably damaging |
| rs1052562 | NP_997248 | L | I | LI | benign            |
| rs1052571 | NP_127463 | A | V | AV | benign            |
| rs1052571 | NP_001220 | A | V | AV | benign            |
| rs1052574 | NP_001220 | L | P | LP | possibly damaging |
| rs1052576 | NP_001220 | Q | R | QR | benign            |
| rs1052600 | NP_064618 | I | F | IF | benign            |
| rs1052601 | NP_064618 | R | W | RW | possibly damaging |
| rs1052618 | NP_079522 | R | K | RK | benign            |
| rs1052621 | NP_919306 | L | F | LF | possibly damaging |
| rs1052637 | NP_006764 | T | S | TS | benign            |
| rs1052638 | NP_004033 | H | Y | HY | possibly damaging |
| rs1052644 | NP_002384 | A | G | AG | benign            |
| rs1052660 | NP_004492 | F | L | FL | benign            |
| rs1052660 | NP_114032 | L | F | LF | benign            |
| rs1052661 | NP_000838 | I | L | IL | benign            |

|           |           |   |   |    |                   |
|-----------|-----------|---|---|----|-------------------|
| rs1052670 | NP_973723 | Q | P | QP | benign            |
| rs1052671 | NP_055792 | Q | R | QR | benign            |
| rs1052680 | NP_597733 | Q | H | QH | benign            |
| rs1052690 | XP_497063 | K | T | KT | benign            |
| rs1052692 | NP_003191 | G | S | GS | benign            |
| rs1052736 | NP_003191 | Q | E | QE | benign            |
| rs1052739 | XP_372191 | L | P | LP | possibly damaging |
| rs1052740 | NP_003191 | K | Q | KQ | benign            |
| rs1052743 | NP_003191 | R | S | RS | probably damaging |
| rs1052748 | NP_002654 | I | T | IT | benign            |
| rs1052753 | NP_003191 | V | M | VM | benign            |
| rs1052763 | NP_443732 | T | M | TM | possibly damaging |
| rs1052765 | NP_006525 | G | R | GR | probably damaging |
| rs1052765 | NP_858045 | G | R | GR | probably damaging |
| rs1052768 | NP_003191 | L | V | LV | benign            |
| rs1052778 | NP_003191 | K | Q | KQ | possibly damaging |
| rs1052790 | NP_003119 | H | D | HD | benign            |
| rs1052790 | NP_842565 | H | D | HD | probably damaging |
| rs1052793 | NP_003191 | P | R | PR | probably damaging |
| rs1052800 | NP_998801 | R | Q | RQ | benign            |
| rs1052800 | NP_976228 | R | Q | RQ | benign            |
| rs1052800 | NP_005442 | R | Q | RQ | benign            |
| rs1052818 | NP_001559 | F | L | FL | possibly damaging |
| rs1052832 | NP_113642 | S | L | SL | benign            |
| rs1052853 | NP_003314 | L | H | LH | benign            |
| rs1052866 | NP_055240 | G | A | GA | possibly damaging |
| rs1052867 | NP_055240 | S | R | SR | benign            |
| rs1052868 | XP_372191 | H | R | HR | benign            |
| rs1052869 | NP_055240 | N | D | ND | possibly damaging |
| rs1052878 | NP_065826 | L | P | LP | probably damaging |
| rs1052887 | XP_375268 | N | K | NK | benign            |
| rs1052903 | XP_372191 | P | H | PH | benign            |
| rs1052908 | NP_075389 | R | S | RS | benign            |
| rs1052909 | XP_372191 | R | W | RW | probably damaging |
| rs1052920 | XP_372191 | A | G | AG | benign            |
| rs1052963 | NP_006855 | E | Q | EQ | benign            |
| rs1052968 | NP_006855 | N | T | NT | benign            |
| rs1052975 | NP_006855 | P | R | PR | benign            |
| rs1052976 | NP_004578 | S | L | SL | benign            |
| rs1052984 | NP_006855 | W | R | WR | possibly damaging |
| rs1053002 | NP_006855 | Q | H | QH | probably damaging |
| rs1053008 | NP_006660 | A | V | AV | benign            |
| rs1053008 | NP_006855 | V | A | VA | benign            |
| rs1053019 | NP_060805 | F | L | FL | benign            |
| rs1053042 | NP_037454 | S | I | SI | possibly damaging |
| rs1053052 | NP_057097 | S | P | SP | benign            |

|           |           |   |   |    |                   |
|-----------|-----------|---|---|----|-------------------|
| rs1053077 | NP_060336 | D | E | DE | benign            |
| rs1053079 | NP_060336 | T | A | TA | benign            |
| rs1053084 | NP_055197 | F | L | FL | probably damaging |
| rs1053089 | NP_004044 | A | G | AG | benign            |
| rs1053100 | NP_001914 | V | M | VM | benign            |
| rs1053134 | NP_002169 | T | P | TP | benign            |
| rs1053174 | NP_005957 | D | N | DN | benign            |
| rs1053175 | NP_005957 | H | R | HR | possibly damaging |
| rs1053176 | NP_005957 | R | W | RW | possibly damaging |
| rs1053193 | NP_057192 | Q | E | QE | benign            |
| rs1053228 | NP_071377 | Q | H | QH | possibly damaging |
| rs1053230 | NP_003670 | C | R | CR | probably damaging |
| rs1053261 | NP_002008 | Y | H | YH | possibly damaging |
| rs1053262 | NP_006078 | I | M | IM | benign            |
| rs1053267 | NP_006078 | A | V | AV | benign            |
| rs1053287 | NP_631902 | M | I | MI | benign            |
| rs1053296 | NP_003109 | R | G | RG | possibly damaging |
| rs1053297 | NP_036388 | T | A | TA | benign            |
| rs1053300 | NP_004617 | G | R | GR | probably damaging |
| rs1053301 | NP_004617 | S | W | SW | possibly damaging |
| rs1053312 | NP_001839 | R | H | RH | benign            |
| rs1053338 | NP_000324 | K | R | KR | benign            |
| rs1053340 | NP_000324 | P | S | PS | possibly damaging |
| rs1053341 | NP_057309 | I | L | IL | benign            |
| rs1053341 | NP_057208 | I | L | IL | benign            |
| rs1053346 | NP_057309 | V | A | VA | benign            |
| rs1053346 | NP_057208 | V | A | VA | benign            |
| rs1053348 | NP_057309 | N | T | NT | benign            |
| rs1053348 | NP_057208 | N | T | NT | benign            |
| rs1053387 | NP_005679 | T | N | TN | benign            |
| rs1053401 | NP_079179 | P | H | PH | probably damaging |
| rs1053419 | NP_004885 | I | V | IV | benign            |
| rs1053429 | NP_005304 | E | V | EV | probably damaging |
| rs1053435 | NP_055908 | R | K | RK | benign            |
| rs1053435 | NP_663317 | R | K | RK | benign            |
| rs1053443 | NP_060377 | S | L | SL | possibly damaging |
| rs1053465 | NP_003934 | S | P | SP | benign            |
| rs1053526 | NP_005178 | E | G | EG | probably damaging |
| rs1053526 | NP_787127 | E | G | EG | probably damaging |
| rs1053564 | NP_775969 | M | I | MI | benign            |
| rs1053566 | NP_660186 | L | F | LF | benign            |
| rs1053574 | NP_009005 | T | P | TP | possibly damaging |
| rs1053593 | NP_005478 | G | V | GV | possibly damaging |
| rs1053600 | NP_006176 | L | Q | LQ | possibly damaging |
| rs1053601 | NP_006176 | K | E | KE | benign            |
| rs1053611 | NP_115971 | V | I | VI | benign            |

|           |           |   |   |    |                   |
|-----------|-----------|---|---|----|-------------------|
| rs1053620 | NP_115971 | D | N | DN | benign            |
| rs1053643 | NP_115971 | K | E | KE | benign            |
| rs1053665 | NP_055906 | T | I | TI | benign            |
| rs1053668 | NP_001212 | Q | E | QE | possibly damaging |
| rs1053668 | NP_742126 | Q | E | QE | possibly damaging |
| rs1053668 | NP_742125 | Q | E | QE | possibly damaging |
| rs1053680 | NP_060388 | I | V | IV | benign            |
| rs1053683 | NP_057005 | S | F | SF | benign            |
| rs1053737 | NP_068799 | T | R | TR | benign            |
| rs1053765 | NP_689572 | R | K | RK | benign            |
| rs1053808 | NP_003307 | M | T | MT | benign            |
| rs1053812 | NP_003167 | E | D | ED | benign            |
| rs1053813 | NP_004891 | R | H | RH | benign            |
| rs1053814 | NP_002262 | L | I | LI | benign            |
| rs1053819 | NP_004244 | T | P | TP | possibly damaging |
| rs1053833 | NP_003307 | N | H | NH | benign            |
| rs1053838 | NP_003307 | A | E | AE | benign            |
| rs1053839 | NP_848578 | P | S | PS | benign            |
| rs1053840 | NP_003307 | P | S | PS | benign            |
| rs1053844 | NP_002969 | C | Y | CY | probably damaging |
| rs1053874 | NP_005214 | R | Q | RQ | benign            |
| rs1053880 | NP_003639 | L | V | LV | benign            |
| rs1053880 | NP_690618 | L | V | LV | benign            |
| rs1053885 | NP_002166 | M | L | ML | benign            |
| rs1053892 | NP_003901 | E | Q | EQ | benign            |
| rs1053911 | NP_002903 | H | Q | HQ | benign            |
| rs1053912 | NP_002903 | Q | E | QE | benign            |
| rs1053913 | NP_002903 | E | K | EK | benign            |
| rs1053920 | NP_002463 | D | E | DE | benign            |
| rs1053926 | NP_055056 | H | Y | HY | benign            |
| rs1053927 | NP_061971 | E | V | EV | benign            |
| rs1053959 | NP_036344 | S | A | SA | benign            |
| rs1053966 | NP_003307 | H | D | HD | probably damaging |
| rs1053993 | NP_848572 | T | S | TS | benign            |
| rs1054007 | NP_005884 | S | G | SG | benign            |
| rs1054079 | NP_060309 | Q | L | QL | possibly damaging |
| rs1054090 | XP_035572 | Q | R | QR | benign            |
| rs1054113 | NP_000485 | M | I | MI | benign            |
| rs1054113 | NP_570134 | M | I | MI | benign            |
| rs1054138 | NP_001287 | Q | L | QL | possibly damaging |
| rs1054139 | NP_001287 | Q | H | QH | benign            |
| rs1054202 | NP_277031 | D | N | DN | benign            |
| rs1054202 | NP_277032 | D | N | DN | benign            |
| rs1054202 | NP_277033 | D | N | DN | benign            |
| rs1054202 | NP_277035 | D | N | DN | benign            |
| rs1054202 | NP_000179 | N | D | ND | benign            |



|           |           |   |   |    |                   |
|-----------|-----------|---|---|----|-------------------|
| rs1054203 | NP_277031 | L | M | LM | benign            |
| rs1054203 | NP_277032 | L | M | LM | benign            |
| rs1054203 | NP_277033 | L | M | LM | benign            |
| rs1054203 | NP_277035 | L | M | LM | benign            |
| rs1054203 | NP_000179 | M | L | ML | benign            |
| rs1054209 | NP_112578 | W | G | WG | probably damaging |
| rs1054222 | NP_005012 | T | P | TP | benign            |
| rs1054223 | NP_112578 | L | F | LF | benign            |
| rs1054224 | NP_001093 | E | D | ED | benign            |
| rs1054225 | NP_001093 | E | D | ED | benign            |
| rs1054229 | NP_001093 | K | R | KR | benign            |
| rs1054235 | NP_001093 | S | C | SC | possibly damaging |
| rs1054237 | NP_001093 | S | T | ST | possibly damaging |
| rs1054239 | NP_001093 | L | M | LM | benign            |
| rs1054257 | NP_958800 | E | K | EK | benign            |
| rs1054267 | NP_002228 | G | D | GD | probably damaging |
| rs1054271 | NP_079488 | S | P | SP | benign            |
| rs1054276 | NP_958800 | A | P | AP | benign            |
| rs1054331 | NP_821080 | C | S | CS | probably damaging |
| rs1054331 | NP_001060 | S | C | SC | probably damaging |
| rs1054339 | XP_371401 | G | C | GC | benign            |
| rs1054341 | XP_371401 | G | V | GV | benign            |
| rs1054342 | XP_371401 | Q | P | QP | possibly damaging |
| rs1054343 | XP_371401 | L | F | LF | benign            |
| rs1054344 | XP_371401 | S | T | ST | benign            |
| rs1054348 | XP_371401 | A | V | AV | benign            |
| rs1054349 | XP_371401 | M | K | MK | benign            |
| rs1054350 | XP_371401 | M | I | MI | benign            |
| rs1054353 | XP_371401 | M | L | ML | benign            |
| rs1054354 | XP_371401 | K | E | KE | benign            |
| rs1054355 | XP_371401 | R | Q | RQ | benign            |
| rs1054358 | XP_371401 | R | G | RG | possibly damaging |
| rs1054361 | XP_371401 | R | K | RK | benign            |
| rs1054362 | XP_371401 | K | R | KR | benign            |
| rs1054365 | XP_371401 | E | K | EK | benign            |
| rs1054374 | NP_000511 | S | I | SI | benign            |
| rs1054392 | NP_015556 | E | K | EK | benign            |
| rs1054403 | NP_004981 | A | D | AD | possibly damaging |
| rs1054406 | NP_038476 | E | G | EG | possibly damaging |
| rs1054406 | NP_872589 | E | G | EG | possibly damaging |
| rs1054412 | NP_005054 | A | T | AT | possibly damaging |
| rs1054423 | NP_006381 | F | I | FI | benign            |
| rs1054436 | XP_497371 | V | M | VM | benign            |
| rs1054480 | NP_055059 | P | S | PS | probably damaging |
| rs1054485 | NP_060825 | I | L | IL | benign            |
| rs1054515 | NP_112580 | V | I | VI | benign            |

|           |           |   |   |    |                   |
|-----------|-----------|---|---|----|-------------------|
| rs1054550 | NP_775786 | T | N | TN | benign            |
| rs1054563 | NP_898881 | D | E | DE | benign            |
| rs1054565 | NP_005671 | T | A | TA | benign            |
| rs1054567 | NP_219480 | G | S | GS | possibly damaging |
| rs1054570 | NP_898881 | G | D | GD | possibly damaging |
| rs1054602 | NP_005221 | N | K | NK | benign            |
| rs1054614 | NP_057510 | L | P | LP | possibly damaging |
| rs1054624 | NP_000452 | T | I | TI | possibly damaging |
| rs1054627 | NP_004958 | G | E | GE | benign            |
| rs1054628 | NP_004958 | V | A | VA | benign            |
| rs1054629 | NP_004958 | E | D | ED | benign            |
| rs1054633 | NP_005483 | A | P | AP | benign            |
| rs1054644 | NP_066921 | R | H | RH | benign            |
| rs1054645 | NP_066921 | H | R | HR | benign            |
| rs1054655 | NP_005530 | R | P | RP | possibly damaging |
| rs1054686 | NP_659411 | Y | H | YH | benign            |
| rs1054707 | XP_371837 | N | S | NS | benign            |
| rs1054708 | NP_000360 | H | Y | HY | benign            |
| rs1054770 | NP_055234 | G | S | GS | possibly damaging |
| rs1054778 | XP_375024 | Q | R | QR | benign            |
| rs1054780 | XP_375024 | K | R | KR | benign            |
| rs1054782 | XP_375024 | T | A | TA | benign            |
| rs1054785 | XP_375024 | M | L | ML | benign            |
| rs1054792 | NP_059145 | E | K | EK | benign            |
| rs1054792 | NP_004433 | E | K | EK | benign            |
| rs1054797 | NP_085055 | R | Q | RQ | benign            |
| rs1054865 | NP_001479 | M | V | MV | possibly damaging |
| rs1054865 | NP_597683 | M | V | MV | possibly damaging |
| rs1054895 | NP_004076 | V | I | VI | benign            |
| rs1054901 | NP_071905 | A | D | AD | benign            |
| rs1054913 | NP_004290 | R | K | RK | benign            |
| rs1054914 | NP_004290 | L | P | LP | possibly damaging |
| rs1054940 | NP_060199 | R | K | RK | benign            |
| rs1054940 | NP_573441 | R | K | RK | benign            |
| rs1054968 | NP_872423 | K | E | KE | possibly damaging |
| rs1054977 | XP_058743 | A | T | AT | benign            |
| rs1055024 | NP_006640 | N | K | NK | benign            |
| rs1055027 | NP_006640 | R | Q | RQ | benign            |
| rs1055029 | NP_006640 | S | P | SP | benign            |
| rs1055030 | NP_006640 | K | N | KN | benign            |
| rs1055031 | NP_006640 | C | S | CS | benign            |
| rs1055103 | NP_001983 | A | P | AP | benign            |
| rs1055130 | NP_076999 | R | H | RH | possibly damaging |
| rs1055153 | NP_056287 | P | Q | PQ | possibly damaging |
| rs1055202 | NP_055139 | P | L | PL | benign            |
| rs1055226 | NP_775179 | V | F | VF | possibly damaging |

|           |           |   |   |    |                   |
|-----------|-----------|---|---|----|-------------------|
| rs1055226 | NP_963862 | V | F | VF | possibly damaging |
| rs1055226 | NP_055652 | V | F | VF | possibly damaging |
| rs1055244 | NP_775765 | T | P | TP | benign            |
| rs1055246 | NP_003648 | P | S | PS | benign            |
| rs1055308 | NP_001745 | S | R | SR | benign            |
| rs1055309 | NP_001745 | S | R | SR | benign            |
| rs1055358 | XP_372121 | S | P | SP | possibly damaging |
| rs1055358 | NP_060046 | P | S | PS | probably damaging |
| rs1055465 | NP_003599 | N | K | NK | possibly damaging |
| rs1055466 | NP_003599 | L | I | LI | benign            |
| rs1055467 | NP_003599 | F | I | FI | benign            |
| rs1055475 | NP_002351 | A | S | AS | benign            |
| rs1055481 | NP_006464 | D | H | DH | possibly damaging |
| rs1055497 | XP_291344 | E | A | EA | benign            |
| rs1055564 | NP_006433 | P | T | PT | possibly damaging |
| rs1055585 | XP_371230 | D | Y | DY | possibly damaging |
| rs1055587 | NP_067004 | F | S | FS | possibly damaging |
| rs1055612 | NP_006433 | S | F | SF | benign            |
| rs1055621 | NP_060666 | F | L | FL | probably damaging |
| rs1055666 | XP_058720 | Q | K | QK | benign            |
| rs1055667 | XP_058720 | R | Q | RQ | benign            |
| rs1055682 | NP_997301 | G | R | GR | benign            |
| rs1055687 | NP_065986 | G | C | GC | probably damaging |
| rs1055688 | NP_065986 | A | T | AT | benign            |
| rs1055750 | NP_663299 | V | I | VI | benign            |
| rs1055774 | NP_620412 | Y | F | YF | benign            |
| rs1055796 | NP_892121 | Y | H | YH | benign            |
| rs1055812 | NP_036361 | I | F | IF | benign            |
| rs1055851 | NP_063944 | H | Q | HQ | benign            |
| rs1055859 | NP_116248 | H | P | HP | probably damaging |
| rs1055935 | NP_005407 | L | V | LV | benign            |
| rs1056020 | NP_778203 | V | L | VL | benign            |
| rs1056020 | NP_001834 | V | L | VL | benign            |
| rs1056042 | NP_061946 | C | Y | CY | probably damaging |
| rs1056078 | NP_003740 | S | L | SL | benign            |
| rs1056095 | NP_620126 | Y | D | YD | probably damaging |
| rs1056104 | NP_079051 | G | D | GD | possibly damaging |
| rs1056137 | NP_060141 | E | K | EK | benign            |
| rs1056147 | NP_056468 | R | C | RC | probably damaging |
| rs1056148 | NP_612474 | A | T | AT | benign            |
| rs1056149 | NP_689763 | A | G | AG | benign            |
| rs1056185 | NP_060770 | N | S | NS | probably damaging |
| rs1056191 | NP_005125 | E | K | EK | benign            |
| rs1056216 | NP_999626 | A | G | AG | benign            |
| rs1056296 | NP_079058 | H | R | HR | possibly damaging |
| rs1056320 | NP_659410 | H | N | HN | benign            |

|           |           |   |   |    |                   |
|-----------|-----------|---|---|----|-------------------|
| rs1056396 | NP_060357 | H | P | HP | probably damaging |
| rs1056445 | NP_002444 | N | T | NT | benign            |
| rs1056463 | NP_002225 | L | Q | LQ | probably damaging |
| rs1056464 | NP_002225 | P | S | PS | probably damaging |
| rs1056478 | NP_004889 | E | K | EK | possibly damaging |
| rs1056505 | NP_004238 | G | V | GV | probably damaging |
| rs1056513 | NP_005790 | G | S | GS | benign            |
| rs1056513 | NP_795352 | G | S | GS | benign            |
| rs1056513 | NP_795353 | G | S | GS | benign            |
| rs1056522 | NP_690849 | R | Q | RQ | benign            |
| rs1056523 | NP_690849 | A | E | AE | benign            |
| rs1056536 | NP_003250 | A | T | AT | benign            |
| rs1056538 | NP_003250 | I | V | IV | benign            |
| rs1056543 | NP_434698 | S | T | ST | benign            |
| rs1056543 | NP_005789 | S | T | ST | benign            |
| rs1056543 | NP_998755 | S | T | ST | benign            |
| rs1056569 | NP_079472 | V | F | VF | benign            |
| rs1056572 | NP_005145 | N | K | NK | possibly damaging |
| rs1056573 | NP_005145 | Q | K | QK | benign            |
| rs1056574 | NP_005145 | E | K | EK | benign            |
| rs1056577 | NP_005145 | A | G | AG | benign            |
| rs1056584 | NP_000913 | A | V | AV | benign            |
| rs1056596 | NP_000766 | L | Q | LQ | possibly damaging |
| rs1056602 | NP_005647 | K | N | KN | benign            |
| rs1056614 | NP_003459 | S | T | ST | benign            |
| rs1056642 | NP_775774 | M | I | MI | benign            |
| rs1056643 | NP_775774 | S | A | SA | benign            |
| rs1056645 | NP_775774 | Y | D | YD | probably damaging |
| rs1056673 | NP_005246 | D | G | DG | benign            |
| rs1056677 | NP_859531 | G | R | GR | benign            |
| rs1056677 | NP_002544 | G | R | GR | benign            |
| rs1056683 | XP_045423 | V | L | VL | benign            |
| rs1056685 | NP_036423 | H | R | HR | possibly damaging |
| rs1056694 | NP_005501 | S | T | ST | benign            |
| rs1056695 | NP_940819 | E | K | EK | benign            |
| rs1056695 | NP_068767 | E | K | EK | benign            |
| rs1056717 | NP_005683 | R | S | RS | benign            |
| rs1056717 | NP_009120 | R | S | RS | benign            |
| rs1056742 | NP_597994 | K | Q | KQ | benign            |
| rs1056742 | NP_002866 | K | Q | KQ | possibly damaging |
| rs1056771 | NP_002423 | V | L | VL | benign            |
| rs1056784 | NP_002420 | P | S | PS | possibly damaging |
| rs1056784 | NP_073628 | P | S | PS | probably damaging |
| rs1056787 | NP_001803 | D | G | DG | benign            |
| rs1056790 | NP_877423 | D | N | DN | benign            |
| rs1056790 | NP_005905 | D | N | DN | benign            |

|           |           |   |   |    |                   |
|-----------|-----------|---|---|----|-------------------|
| rs1056799 | NP_000839 | M | K | MK | benign            |
| rs1056804 | NP_150282 | N | K | NK | benign            |
| rs1056805 | NP_150282 | R | W | RW | benign            |
| rs1056814 | NP_150282 | I | V | IV | benign            |
| rs1056818 | NP_005666 | L | V | LV | benign            |
| rs1056818 | NP_150282 | V | L | VL | benign            |
| rs1056820 | NP_758961 | T | S | TS | benign            |
| rs1056827 | NP_000095 | A | S | AS | benign            |
| rs1056836 | NP_000095 | V | L | VL | benign            |
| rs1056837 | NP_000095 | D | E | DE | benign            |
| rs1056852 | NP_008971 | A | T | AT | benign            |
| rs1056852 | NP_653334 | A | T | AT | benign            |
| rs1056853 | NP_008971 | G | A | GA | benign            |
| rs1056853 | NP_653334 | G | A | GA | benign            |
| rs1056853 | NP_653333 | G | A | GA | benign            |
| rs1056861 | NP_955391 | R | K | RK | benign            |
| rs1056861 | NP_955392 | R | K | RK | benign            |
| rs1056861 | NP_955393 | R | K | RK | benign            |
| rs1056861 | NP_955394 | R | K | RK | benign            |
| rs1056861 | NP_955395 | R | K | RK | benign            |
| rs1056861 | NP_003279 | R | K | RK | benign            |
| rs1056892 | NP_001227 | V | M | VM | benign            |
| rs1056899 | NP_055861 | I | V | IV | benign            |
| rs1056918 | NP_006368 | T | S | TS | benign            |
| rs1056921 | NP_001842 | K | R | KR | benign            |
| rs1056921 | NP_511040 | K | R | KR | benign            |
| rs1056923 | NP_001842 | L | V | LV | benign            |
| rs1056923 | NP_511040 | L | V | LV | benign            |
| rs1056925 | NP_003480 | A | T | AT | benign            |
| rs1056933 | NP_620309 | E | G | EG | benign            |
| rs1056936 | NP_620309 | H | Y | HY | possibly damaging |
| rs1056940 | NP_004714 | E | K | EK | benign            |
| rs1056941 | NP_004714 | D | A | DA | benign            |
| rs1056942 | NP_004714 | M | L | ML | benign            |
| rs1056943 | NP_004714 | L | M | LM | benign            |
| rs1056958 | NP_060404 | H | Y | HY | benign            |
| rs1056959 | NP_060404 | R | K | RK | benign            |
| rs1056960 | NP_060404 | S | P | SP | benign            |
| rs1056972 | NP_003370 | R | G | RG | possibly damaging |
| rs1056973 | NP_003370 | K | E | KE | benign            |
| rs1056974 | NP_003370 | K | R | KR | benign            |
| rs1056980 | NP_079341 | N | D | ND | benign            |
| rs1056997 | NP_004435 | E | D | ED | benign            |
| rs1056998 | NP_997704 | F | S | FS | probably damaging |
| rs1057000 | NP_112557 | L | R | LR | benign            |
| rs1057000 | NP_003709 | L | R | LR | benign            |

|           |           |   |   |    |                   |
|-----------|-----------|---|---|----|-------------------|
| rs1057018 | NP_005522 | H | D | HD | probably damaging |
| rs1057027 | NP_005522 | R | S | RS | benign            |
| rs1057028 | NP_005522 | Y | N | YN | probably damaging |
| rs1057036 | NP_002939 | H | P | HP | benign            |
| rs1057037 | NP_002617 | D | V | DV | benign            |
| rs1057044 | NP_006155 | R | K | RK | benign            |
| rs1057053 | NP_005522 | S | C | SC | benign            |
| rs1057060 | NP_005225 | L | M | LM | benign            |
| rs1057066 | NP_005815 | A | G | AG | possibly damaging |
| rs1057075 | NP_008970 | H | L | HL | benign            |
| rs1057077 | NP_964013 | V | E | VE | possibly damaging |
| rs1057078 | NP_942568 | L | P | LP | probably damaging |
| rs1057078 | NP_055858 | L | P | LP | probably damaging |
| rs1057080 | NP_005522 | F | S | FS | possibly damaging |
| rs1057088 | NP_059990 | V | D | VD | benign            |
| rs1057090 | NP_078872 | V | A | VA | benign            |
| rs1057091 | NP_078872 | P | S | PS | benign            |
| rs1057093 | NP_059990 | S | F | SF | possibly damaging |
| rs1057099 | NP_005813 | S | G | SG | benign            |
| rs1057114 | NP_542970 | G | A | GA | benign            |
| rs1057149 | NP_000584 | R | Q | RQ | benign            |
| rs1057177 | NP_004945 | Q | P | QP | benign            |
| rs1057177 | NP_059672 | Q | P | QP | benign            |
| rs1057178 | NP_004945 | F | S | FS | benign            |
| rs1057178 | NP_059672 | F | S | FS | benign            |
| rs1057182 | NP_954572 | G | V | GV | probably damaging |
| rs1057190 | NP_112582 | K | E | KE | benign            |
| rs1057191 | NP_000310 | T | I | TI | benign            |
| rs1057192 | XP_496823 | G | R | GR | possibly damaging |
| rs1057204 | NP_005495 | G | S | GS | benign            |
| rs1057211 | NP_671488 | H | Y | HY | possibly damaging |
| rs1057216 | NP_660331 | E | D | ED | benign            |
| rs1057238 | NP_055472 | A | V | AV | benign            |
| rs1057251 | NP_060417 | V | A | VA | benign            |
| rs1057274 | NP_002021 | D | H | DH | possibly damaging |
| rs1057287 | NP_066278 | V | L | VL | benign            |
| rs1057288 | NP_066278 | V | L | VL | benign            |
| rs1057306 | NP_079492 | P | T | PT | benign            |
| rs1057319 | NP_066278 | I | R | IR | benign            |
| rs1057327 | NP_009087 | G | S | GS | benign            |
| rs1057335 | NP_000925 | R | K | RK | benign            |
| rs1057339 | XP_372226 | T | A | TA | benign            |
| rs1057340 | XP_372226 | N | S | NS | benign            |
| rs1057341 | XP_372226 | D | N | DN | benign            |
| rs1057343 | XP_372226 | T | R | TR | benign            |
| rs1057353 | NP_008884 | A | P | AP | probably damaging |

|           |           |   |   |    |                   |
|-----------|-----------|---|---|----|-------------------|
| rs1057362 | NP_000946 | A | T | AT | benign            |
| rs1057411 | NP_059973 | T | P | TP | benign            |
| rs1057539 | NP_739575 | N | D | ND | benign            |
| rs1057539 | NP_079512 | N | D | ND | benign            |
| rs1057562 | NP_009180 | S | P | SP | benign            |
| rs1057562 | NP_057369 | S | P | SP | benign            |
| rs1057580 | NP_008994 | L | F | LF | possibly damaging |
| rs1057633 | NP_075252 | D | V | DV | possibly damaging |
| rs1057633 | NP_998812 | D | V | DV | probably damaging |
| rs1057635 | NP_597724 | L | F | LF | benign            |
| rs1057744 | NP_002217 | E | K | EK | benign            |
| rs1057744 | NP_660142 | E | K | EK | benign            |
| rs1057746 | NP_054740 | R | C | RC | benign            |
| rs1057747 | NP_002904 | R | L | RL | probably damaging |
| rs1057749 | NP_002904 | G | D | GD | possibly damaging |
| rs1057751 | NP_002904 | S | A | SA | benign            |
| rs1057758 | NP_060126 | T | I | TI | benign            |
| rs1057761 | NP_060126 | R | T | RT | benign            |
| rs1057764 | NP_001547 | E | G | EG | probably damaging |
| rs1057767 | NP_002246 | V | L | VL | benign            |
| rs1057774 | NP_000710 | S | P | SP | benign            |
| rs1057795 | NP_006272 | D | E | DE | benign            |
| rs1057797 | NP_004270 | C | F | CF | probably damaging |
| rs1057864 | NP_005069 | V | A | VA | benign            |
| rs1057866 | NP_005069 | H | D | HD | benign            |
| rs1057868 | NP_000932 | V | A | VA | benign            |
| rs1057872 | NP_000100 | Q | L | QL | possibly damaging |
| rs1057872 | NP_003997 | Q | L | QL | possibly damaging |
| rs1057872 | NP_003998 | Q | L | QL | possibly damaging |
| rs1057872 | NP_004000 | Q | L | QL | possibly damaging |
| rs1057872 | NP_004002 | Q | L | QL | possibly damaging |
| rs1057872 | NP_004003 | Q | L | QL | possibly damaging |
| rs1057872 | NP_004001 | Q | L | QL | possibly damaging |
| rs1057896 | NP_127493 | L | V | LV | benign            |
| rs1057896 | NP_127494 | L | V | LV | benign            |
| rs1057896 | NP_001509 | L | V | LV | benign            |
| rs1057896 | NP_127492 | L | V | LV | benign            |
| rs1057907 | NP_004809 | L | F | LF | benign            |
| rs1057909 | NP_000762 | Y | C | YC | possibly damaging |
| rs1057910 | NP_000762 | I | L | IL | benign            |
| rs1057913 | NP_114066 | D | A | DA | possibly damaging |
| rs1057913 | NP_114037 | D | A | DA | possibly damaging |
| rs1057913 | NP_113599 | D | A | DA | possibly damaging |
| rs1057913 | NP_061721 | D | A | DA | possibly damaging |
| rs1057913 | NP_061722 | D | A | DA | possibly damaging |
| rs1057913 | NP_061733 | D | A | DA | probably damaging |

|           |           |   |   |    |                   |
|-----------|-----------|---|---|----|-------------------|
| rs1057913 | NP_061732 | D | A | DA | probably damaging |
| rs1057913 | NP_061730 | D | A | DA | probably damaging |
| rs1057913 | NP_061726 | D | A | DA | probably damaging |
| rs1057913 | NP_114063 | D | A | DA | probably damaging |
| rs1057913 | NP_061734 | D | A | DA | probably damaging |
| rs1057913 | NP_061731 | D | A | DA | probably damaging |
| rs1057913 | NP_061729 | D | A | DA | probably damaging |
| rs1057913 | NP_061728 | D | A | DA | probably damaging |
| rs1057913 | NP_061727 | D | A | DA | probably damaging |
| rs1057913 | NP_061725 | D | A | DA | probably damaging |
| rs1057913 | NP_061724 | D | A | DA | probably damaging |
| rs1057913 | NP_061723 | D | A | DA | probably damaging |
| rs1057932 | NP_919423 | A | E | AE | benign            |
| rs1057932 | NP_008979 | A | E | AE | benign            |
| rs1057933 | NP_919423 | S | N | SN | benign            |
| rs1057933 | NP_008979 | S | N | SN | benign            |
| rs1057940 | NP_037446 | T | P | TP | benign            |
| rs1057941 | XP_496413 | R | W | RW | benign            |
| rs1057942 | NP_000148 | S | G | SG | benign            |
| rs1057950 | NP_004732 | R | S | RS | benign            |
| rs1057986 | NP_005985 | A | P | AP | benign            |
| rs1057989 | NP_005985 | Q | L | QL | probably damaging |
| rs1058006 | NP_003827 | D | G | DG | benign            |
| rs1058009 | NP_003827 | N | S | NS | benign            |
| rs1058017 | NP_075567 | L | R | LR | benign            |
| rs1058034 | NP_891847 | H | R | HR | possibly damaging |
| rs1058034 | NP_061152 | H | R | HR | possibly damaging |
| rs1058035 | NP_891847 | P | L | PL | probably damaging |
| rs1058035 | NP_061152 | P | L | PL | probably damaging |
| rs1058060 | XP_497072 | K | N | KN | benign            |
| rs1058063 | NP_000315 | D | N | DN | benign            |
| rs1058069 | NP_000508 | T | N | TN | benign            |
| rs1058069 | NP_000549 | T | N | TN | benign            |
| rs1058084 | NP_112536 | D | N | DN | benign            |
| rs1058084 | NP_002776 | N | D | ND | benign            |
| rs1058084 | NP_976032 | N | D | ND | benign            |
| rs1058085 | NP_002776 | A | T | AT | benign            |
| rs1058085 | NP_976032 | A | T | AT | benign            |
| rs1058085 | NP_112536 | T | A | TA | benign            |
| rs1058086 | NP_002776 | L | Q | LQ | benign            |
| rs1058086 | NP_976032 | L | Q | LQ | benign            |
| rs1058086 | NP_112536 | Q | L | QL | benign            |
| rs1058092 | NP_112536 | R | W | RW | benign            |
| rs1058092 | NP_002776 | W | R | WR | benign            |
| rs1058092 | NP_976032 | W | R | WR | benign            |
| rs1058093 | XP_497072 | P | L | PL | benign            |



|           |           |   |   |    |                   |
|-----------|-----------|---|---|----|-------------------|
| rs1058095 | NP_112536 | D | E | DE | benign            |
| rs1058103 | NP_112536 | Q | L | QL | benign            |
| rs1058106 | NP_112536 | N | K | NK | benign            |
| rs1058134 | NP_002028 | Q | K | QK | benign            |
| rs1058146 | NP_477515 | L | F | LF | benign            |
| rs1058146 | NP_919296 | L | F | LF | benign            |
| rs1058146 | NP_919440 | L | F | LF | benign            |
| rs1058172 | NP_000097 | R | H | RH | probably damaging |
| rs1058180 | NP_932164 | T | A | TA | benign            |
| rs1058180 | NP_055177 | T | A | TA | benign            |
| rs1058181 | NP_932164 | L | V | LV | benign            |
| rs1058181 | NP_055177 | L | V | LV | benign            |
| rs1058200 | NP_000601 | Y | S | YS | possibly damaging |
| rs1058219 | NP_000250 | R | C | RC | possibly damaging |
| rs1058223 | NP_002776 | M | T | MT | benign            |
| rs1058259 | NP_002772 | N | K | NK | possibly damaging |
| rs1058285 | NP_002772 | H | R | HR | benign            |
| rs1058299 | NP_065916 | E | K | EK | benign            |
| rs1058308 | NP_620706 | A | P | AP | benign            |
| rs1058308 | NP_003066 | A | P | AP | benign            |
| rs1058334 | NP_000508 | D | E | DE | probably damaging |
| rs1058334 | NP_000549 | D | E | DE | probably damaging |
| rs1058361 | NP_997641 | G | V | GV | possibly damaging |
| rs1058361 | NP_997647 | G | V | GV | probably damaging |
| rs1058370 | NP_004422 | I | N | IN | probably damaging |
| rs1058371 | NP_004422 | I | F | IF | benign            |
| rs1058372 | NP_004422 | K | N | KN | possibly damaging |
| rs1058388 | NP_064540 | G | C | GC | probably damaging |
| rs1058396 | NP_056949 | N | D | ND | benign            |
| rs1058402 | NP_006496 | A | T | AT | benign            |
| rs1058407 | NP_001762 | H | Y | HY | benign            |
| rs1058411 | NP_872339 | P | S | PS | possibly damaging |
| rs1058446 | NP_061819 | E | D | ED | benign            |
| rs1058456 | NP_112536 | Y | D | YD | benign            |
| rs1058458 | NP_006194 | C | R | CR | benign            |
| rs1058464 | NP_112536 | T | P | TP | benign            |
| rs1058465 | NP_148978 | D | E | DE | benign            |
| rs1058466 | NP_112536 | V | A | VA | benign            |
| rs1058470 | NP_112536 | L | F | LF | benign            |
| rs1058471 | NP_112536 | L | I | LI | benign            |
| rs1058472 | NP_003316 | L | M | LM | benign            |
| rs1058473 | NP_112536 | L | H | LH | possibly damaging |
| rs1058482 | NP_006741 | D | E | DE | benign            |
| rs1058519 | XP_371116 | R | Q | RQ | possibly damaging |
| rs1058524 | NP_003810 | D | G | DG | probably damaging |
| rs1058525 | XP_497051 | G | D | GD | possibly damaging |

|           |           |   |   |    |                   |
|-----------|-----------|---|---|----|-------------------|
| rs1058527 | XP_371116 | H | Q | HQ | probably damaging |
| rs1058532 | XP_371116 | N | H | NH | possibly damaging |
| rs1058536 | XP_371116 | D | E | DE | benign            |
| rs1058545 | NP_002367 | S | T | ST | benign            |
| rs1058546 | NP_002367 | A | D | AD | benign            |
| rs1058547 | NP_036458 | E | V | EV | benign            |
| rs1058559 | NP_001925 | A | P | AP | benign            |
| rs1058559 | NP_612138 | A | P | AP | benign            |
| rs1058574 | NP_476519 | P | L | PL | benign            |
| rs1058576 | NP_000612 | S | F | SF | possibly damaging |
| rs1058587 | NP_004855 | D | H | DH | benign            |
| rs1058609 | NP_976028 | V | I | VI | benign            |
| rs1058609 | NP_005340 | V | I | VI | benign            |
| rs1058609 | NP_056958 | V | I | VI | benign            |
| rs1058609 | NP_976029 | V | I | VI | benign            |
| rs1058617 | NP_055045 | Q | H | QH | benign            |
| rs1058646 | NP_003625 | E | K | EK | benign            |
| rs1058652 | NP_008836 | L | P | LP | benign            |
| rs1058661 | NP_008836 | E | Q | EQ | benign            |
| rs1058668 | NP_008836 | D | G | DG | benign            |
| rs1058671 | NP_008836 | V | E | VE | benign            |
| rs1058674 | NP_002773 | L | F | LF | benign            |
| rs1058675 | NP_008836 | N | Y | NY | benign            |
| rs1058679 | NP_002773 | M | T | MT | benign            |
| rs1058680 | NP_002773 | R | L | RL | benign            |
| rs1058688 | NP_002773 | R | S | RS | benign            |
| rs1058689 | NP_008836 | K | Q | KQ | benign            |
| rs1058692 | NP_008836 | E | K | EK | benign            |
| rs1058693 | NP_008836 | T | N | TN | benign            |
| rs1058695 | NP_008836 | N | K | NK | benign            |
| rs1058697 | NP_008836 | L | F | LF | benign            |
| rs1058698 | NP_002775 | K | N | KN | benign            |
| rs1058698 | NP_002773 | K | N | KN | benign            |
| rs1058701 | NP_056448 | E | D | ED | benign            |
| rs1058704 | NP_066296 | N | K | NK | benign            |
| rs1058710 | NP_002773 | L | S | LS | benign            |
| rs1058711 | NP_002775 | A | T | AT | benign            |
| rs1058716 | NP_008836 | N | T | NT | benign            |
| rs1058718 | NP_002771 | K | E | KE | benign            |
| rs1058725 | NP_002773 | P | R | PR | benign            |
| rs1058748 | NP_008836 | R | H | RH | benign            |
| rs1058748 | XP_496314 | R | H | RH | benign            |
| rs1058763 | NP_008836 | Q | E | QE | benign            |
| rs1058763 | XP_496314 | Q | E | QE | benign            |
| rs1058768 | NP_055279 | S | P | SP | probably damaging |
| rs1058770 | NP_008836 | E | G | EG | benign            |

|           |           |   |   |    |                   |
|-----------|-----------|---|---|----|-------------------|
| rs1058770 | XP_496314 | G | E | GE | benign            |
| rs1058779 | XP_496314 | S | P | SP | benign            |
| rs1058779 | NP_002774 | S | P | SP | benign            |
| rs1058793 | NP_065186 | V | I | VI | benign            |
| rs1058808 | NP_004439 | A | P | AP | possibly damaging |
| rs1058813 | NP_068603 | H | P | HP | probably damaging |
| rs1058814 | NP_068603 | R | K | RK | benign            |
| rs1058816 | NP_963918 | R | K | RK | benign            |
| rs1058816 | NP_055832 | R | K | RK | benign            |
| rs1058816 | NP_963920 | R | K | RK | possibly damaging |
| rs1058821 | XP_496034 | E | Q | EQ | benign            |
| rs1058822 | XP_496034 | E | D | ED | benign            |
| rs1058823 | XP_496034 | K | E | KE | benign            |
| rs1058838 | NP_031375 | T | A | TA | benign            |
| rs1058859 | NP_000619 | A | D | AD | benign            |
| rs1058861 | NP_000619 | A | S | AS | benign            |
| rs1058875 | NP_001087 | N | D | ND | benign            |
| rs1058875 | NP_942127 | N | D | ND | benign            |
| rs1058877 | NP_079413 | N | Y | NY | benign            |
| rs1058884 | NP_001854 | E | K | EK | benign            |
| rs1058885 | NP_757351 | L | P | LP | benign            |
| rs1058930 | NP_000761 | M | I | MI | benign            |
| rs1058930 | NP_110518 | M | I | MI | possibly damaging |
| rs1058949 | NP_976221 | A | P | AP | benign            |
| rs1058956 | NP_008836 | E | K | EK | benign            |
| rs1058960 | NP_008836 | I | V | IV | benign            |
| rs1059011 | NP_001609 | Q | H | QH | benign            |
| rs1059040 | NP_001609 | Y | C | YC | probably damaging |
| rs1059047 | NP_005402 | V | A | VA | benign            |
| rs1059049 | NP_005402 | M | T | MT | probably damaging |
| rs1059050 | NP_005402 | M | I | MI | probably damaging |
| rs1059052 | NP_005402 | D | N | DN | benign            |
| rs1059053 | NP_005402 | I | V | IV | benign            |
| rs1059054 | NP_005402 | C | R | CR | benign            |
| rs1059060 | NP_000526 | N | S | NS | benign            |
| rs1059074 | XP_379323 | M | V | MV | benign            |
| rs1059108 | NP_075066 | P | L | PL | probably damaging |
| rs1059116 | XP_377962 | P | L | PL | benign            |
| rs1059128 | XP_377962 | H | R | HR | benign            |
| rs1059145 | NP_821133 | K | R | KR | benign            |
| rs1059166 | NP_003805 | F | L | FL | benign            |
| rs1059175 | NP_150254 | H | P | HP | probably damaging |
| rs1059175 | NP_000968 | H | P | HP | probably damaging |
| rs1059178 | NP_038481 | F | V | FV | benign            |
| rs1059179 | NP_038481 | F | L | FL | benign            |
| rs1059189 | XP_371018 | G | R | GR | possibly damaging |

|           |           |   |   |    |                   |
|-----------|-----------|---|---|----|-------------------|
| rs1059189 | XP_085606 | R | G | RG | possibly damaging |
| rs1059194 | NP_060126 | L | F | LF | benign            |
| rs1059199 | NP_060126 | E | K | EK | benign            |
| rs1059228 | NP_000971 | L | V | LV | benign            |
| rs1059233 | NP_008916 | R | W | RW | probably damaging |
| rs1059240 | NP_004829 | R | S | RS | benign            |
| rs1059333 | NP_683866 | R | H | RH | benign            |
| rs1059333 | NP_683867 | R | H | RH | benign            |
| rs1059333 | NP_683868 | R | H | RH | benign            |
| rs1059333 | NP_683871 | R | H | RH | benign            |
| rs1059333 | NP_003781 | R | H | RH | benign            |
| rs1059345 | NP_002115 | E | D | ED | benign            |
| rs1059345 | NP_002116 | H | Q | HQ | benign            |
| rs1059346 | NP_002115 | I | F | IF | benign            |
| rs1059346 | NP_002116 | I | F | IF | benign            |
| rs1059352 | NP_072049 | G | A | GA | benign            |
| rs1059353 | NP_068818 | G | E | GE | benign            |
| rs1059369 | NP_004855 | S | T | ST | benign            |
| rs1059383 | NP_570854 | V | G | VG | possibly damaging |
| rs1059383 | NP_000453 | V | G | VG | probably damaging |
| rs1059383 | NP_570853 | V | G | VG | probably damaging |
| rs1059421 | NP_659731 | E | K | EK | benign            |
| rs1059440 | NP_113660 | H | R | HR | benign            |
| rs1059443 | NP_002878 | R | G | RG | benign            |
| rs1059463 | NP_002107 | Q | H | QH | benign            |
| rs1059467 | NP_002107 | S | A | SA | benign            |
| rs1059476 | NP_004208 | T | M | TM | benign            |
| rs1059488 | NP_002107 | F | L | FL | benign            |
| rs1059491 | NP_803564 | N | T | NT | benign            |
| rs1059491 | NP_001045 | N | T | NT | benign            |
| rs1059508 | NP_055211 | R | H | RH | benign            |
| rs1059508 | NP_542198 | R | H | RH | benign            |
| rs1059510 | NP_005507 | N | K | NK | probably damaging |
| rs1059517 | NP_002107 | K | Q | KQ | benign            |
| rs1059520 | NP_002107 | R | H | RH | benign            |
| rs1059522 | NP_002063 | F | L | FL | probably damaging |
| rs1059523 | NP_002063 | L | P | LP | probably damaging |
| rs1059526 | NP_002107 | A | T | AT | benign            |
| rs1059527 | NP_002063 | I | V | IV | benign            |
| rs1059531 | NP_002063 | E | D | ED | benign            |
| rs1059536 | NP_002107 | H | R | HR | benign            |
| rs1059537 | NP_002107 | E | Q | EQ | benign            |
| rs1059539 | NP_002107 | A | V | AV | benign            |
| rs1059542 | NP_002107 | D | E | DE | benign            |
| rs1059551 | NP_002115 | C | Y | CY | benign            |
| rs1059552 | NP_002115 | M | L | ML | benign            |

|           |           |   |   |    |                   |
|-----------|-----------|---|---|----|-------------------|
| rs1059553 | NP_002115 | T | A | TA | benign            |
| rs1059556 | NP_002115 | P | R | PR | benign            |
| rs1059569 | NP_072049 | Y | F | YF | benign            |
| rs1059572 | NP_002115 | L | F | LF | benign            |
| rs1059573 | NP_002116 | H | D | HD | benign            |
| rs1059576 | NP_002115 | N | H | NH | benign            |
| rs1059579 | NP_005220 | N | S | NS | benign            |
| rs1059580 | NP_072049 | L | V | LV | benign            |
| rs1059581 | NP_072049 | L | P | LP | probably damaging |
| rs1059582 | NP_002115 | T | R | TR | possibly damaging |
| rs1059586 | NP_002115 | Y | S | YS | benign            |
| rs1059596 | NP_002115 | A | G | AG | benign            |
| rs1059596 | NP_002116 | A | G | AG | benign            |
| rs1059603 | NP_004070 | M | T | MT | possibly damaging |
| rs1059604 | NP_004070 | S | T | ST | benign            |
| rs1059614 | NP_068818 | P | T | PT | benign            |
| rs1059614 | NP_072049 | P | T | PT | benign            |
| rs1059632 | NP_002107 | A | S | AS | benign            |
| rs1059633 | NP_068818 | S | G | SG | benign            |
| rs1059635 | NP_000966 | H | P | HP | probably damaging |
| rs1059644 | NP_002107 | Q | K | QK | benign            |
| rs1059662 | NP_002115 | T | I | TI | benign            |
| rs1059662 | NP_068818 | T | I | TI | benign            |
| rs1059702 | NP_001560 | S | F | SF | benign            |
| rs1059703 | NP_001560 | L | S | LS | benign            |
| rs1059712 | NP_005542 | A | T | AT | benign            |
| rs1059768 | NP_057491 | V | M | VM | benign            |
| rs1059780 | NP_998839 | R | Q | RQ | possibly damaging |
| rs1059784 | NP_005650 | G | D | GD | benign            |
| rs1059785 | NP_005650 | S | T | ST | benign            |
| rs1059815 | NP_277025 | K | N | KN | benign            |
| rs1059815 | NP_277022 | K | N | KN | benign            |
| rs1059815 | NP_277069 | N | K | NK | benign            |
| rs1059815 | NP_277074 | N | K | NK | benign            |
| rs1059854 | NP_002462 | T | S | TS | benign            |
| rs1059868 | NP_851421 | M | T | MT | benign            |
| rs1059868 | NP_851422 | M | T | MT | benign            |
| rs1059868 | NP_055818 | M | T | MT | benign            |
| rs1059868 | XP_496064 | M | T | MT | benign            |
| rs1059896 | NP_002107 | V | M | VM | benign            |
| rs1059901 | XP_290351 | G | V | GV | probably damaging |
| rs1059912 | NP_004226 | D | N | DN | benign            |
| rs1059913 | NP_004226 | T | S | TS | benign            |
| rs1059914 | NP_004226 | L | F | LF | benign            |
| rs1059915 | NP_004226 | D | E | DE | benign            |
| rs1059968 | NP_001652 | T | N | TN | possibly damaging |

|           |           |   |   |    |                   |
|-----------|-----------|---|---|----|-------------------|
| rs1059983 | NP_982255 | E | D | ED | benign            |
| rs1059983 | NP_066953 | E | D | ED | benign            |
| rs1060067 | NP_150594 | L | F | LF | benign            |
| rs1060067 | NP_006449 | L | F | LF | benign            |
| rs1060070 | NP_150594 | T | A | TA | benign            |
| rs1060070 | NP_006449 | T | A | TA | benign            |
| rs1060105 | NP_060653 | S | N | SN | benign            |
| rs1060108 | NP_075563 | S | R | SR | possibly damaging |
| rs1060108 | NP_613074 | S | R | SR | possibly damaging |
| rs1060130 | NP_065208 | V | I | VI | benign            |
| rs1060130 | NP_065209 | V | I | VI | benign            |
| rs1060130 | NP_000028 | V | I | VI | benign            |
| rs1060131 | NP_065209 | V | E | VE | benign            |
| rs1060131 | NP_065210 | V | E | VE | benign            |
| rs1060132 | NP_065209 | E | A | EA | benign            |
| rs1060132 | NP_065210 | E | A | EA | benign            |
| rs1060133 | NP_065209 | D | E | DE | benign            |
| rs1060133 | NP_065210 | D | E | DE | benign            |
| rs1060134 | NP_065209 | P | T | PT | possibly damaging |
| rs1060134 | NP_065210 | P | T | PT | possibly damaging |
| rs1060135 | NP_065209 | E | D | ED | benign            |
| rs1060135 | NP_065210 | E | D | ED | benign            |
| rs1060136 | NP_065209 | L | P | LP | benign            |
| rs1060145 | NP_060707 | E | G | EG | possibly damaging |
| rs1060155 | NP_003022 | A | S | AS | benign            |
| rs1060166 | NP_055324 | E | D | ED | benign            |
| rs1060167 | NP_055324 | Q | E | QE | benign            |
| rs1060207 | NP_000988 | S | F | SF | benign            |
| rs1060212 | NP_039663 | G | E | GE | benign            |
| rs1060212 | NP_000150 | G | E | GE | benign            |
| rs1060231 | NP_003954 | L | F | LF | benign            |
| rs1060242 | NP_653251 | R | C | RC | probably damaging |
| rs1060250 | NP_003477 | N | K | NK | benign            |
| rs1060281 | NP_077078 | H | R | HR | benign            |
| rs1060281 | NP_003285 | H | R | HR | benign            |
| rs1060282 | NP_036349 | P | R | PR | benign            |
| rs1060292 | NP_077078 | G | D | GD | benign            |
| rs1060292 | NP_003285 | G | D | GD | benign            |
| rs1060311 | NP_438173 | D | E | DE | benign            |
| rs1060317 | NP_150644 | H | P | HP | probably damaging |
| rs1060317 | NP_000964 | H | P | HP | probably damaging |
| rs1060339 | NP_000508 | N | K | NK | benign            |
| rs1060339 | NP_000549 | N | K | NK | benign            |
| rs1060346 | NP_002115 | Y | F | YF | benign            |
| rs1060346 | NP_002116 | Y | F | YF | benign            |
| rs1060384 | NP_005270 | F | L | FL | possibly damaging |

|           |           |   |   |    |                   |
|-----------|-----------|---|---|----|-------------------|
| rs1060390 | NP_056368 | S | P | SP | benign            |
| rs1060407 | NP_002366 | S | Y | SY | possibly damaging |
| rs1060463 | NP_067010 | N | D | ND | benign            |
| rs1060480 | NP_068591 | R | S | RS | benign            |
| rs1060575 | NP_689878 | E | D | ED | benign            |
| rs1060584 | NP_060499 | L | F | LF | benign            |
| rs1060585 | NP_005758 | I | V | IV | benign            |
| rs1060614 | NP_009123 | I | M | IM | benign            |
| rs1060622 | NP_057124 | I | T | IT | possibly damaging |
| rs1060663 | NP_005639 | E | Q | EQ | benign            |
| rs1060742 | NP_065830 | Q | R | QR | benign            |
| rs1060788 | NP_000042 | A | T | AT | benign            |
| rs1060807 | XP_047025 | V | A | VA | benign            |
| rs1060821 | NP_000177 | R | I | RI | probably damaging |
| rs1060858 | NP_079136 | G | E | GE | benign            |
| rs1060874 | NP_958357 | R | K | RK | benign            |
| rs1060875 | NP_958357 | T | K | TK | possibly damaging |
| rs1060876 | NP_958357 | Q | K | QK | benign            |
| rs1060878 | NP_005921 | G | R | GR | benign            |
| rs1060878 | NP_976230 | G | R | GR | benign            |
| rs1060878 | NP_976231 | G | R | GR | benign            |
| rs1060878 | NP_976229 | G | R | GR | benign            |
| rs1060878 | NP_976232 | G | R | GR | benign            |
| rs1060896 | NP_004203 | R | S | RS | benign            |
| rs1060899 | NP_006461 | K | N | KN | benign            |
| rs1060900 | NP_006461 | N | S | NS | benign            |
| rs1060903 | XP_085722 | G | V | GV | benign            |
| rs1060903 | NP_006461 | V | G | VG | possibly damaging |
| rs1060927 | XP_036708 | Q | R | QR | benign            |
| rs1061002 | NP_115820 | V | A | VA | benign            |
| rs1061009 | NP_000508 | H | Q | HQ | benign            |
| rs1061009 | NP_000549 | H | Q | HQ | benign            |
| rs1061012 | NP_004727 | T | A | TA | benign            |
| rs1061017 | NP_004818 | E | Q | EQ | benign            |
| rs1061018 | NP_004818 | S | F | SF | probably damaging |
| rs1061024 | NP_060190 | R | G | RG | possibly damaging |
| rs1061079 | NP_068713 | T | P | TP | benign            |
| rs1061079 | NP_001690 | T | P | TP | benign            |
| rs1061082 | NP_004800 | P | R | PR | benign            |
| rs1061086 | NP_778234 | M | R | MR | benign            |
| rs1061086 | XP_379858 | R | M | RM | benign            |
| rs1061159 | NP_060487 | T | I | TI | possibly damaging |
| rs1061170 | NP_000177 | H | Y | HY | benign            |
| rs1061171 | NP_000177 | R | T | RT | possibly damaging |
| rs1061192 | NP_001366 | R | L | RL | probably damaging |
| rs1061202 | NP_055450 | R | G | RG | possibly damaging |

|           |           |   |   |    |                   |
|-----------|-----------|---|---|----|-------------------|
| rs1061202 | NP_852118 | R | G | RG | probably damaging |
| rs1061234 | NP_000175 | I | T | IT | possibly damaging |
| rs1061234 | NP_000550 | T | I | TI | possibly damaging |
| rs1061263 | NP_001988 | R | G | RG | benign            |
| rs1061288 | NP_055807 | N | K | NK | benign            |
| rs1061308 | XP_378185 | E | V | EV | possibly damaging |
| rs1061335 | NP_864764 | G | D | GD | benign            |
| rs1061335 | NP_004412 | G | D | GD | possibly damaging |
| rs1061345 | NP_569077 | M | I | MI | benign            |
| rs1061345 | NP_569075 | M | I | MI | probably damaging |
| rs1061345 | NP_569076 | M | I | MI | probably damaging |
| rs1061345 | NP_002830 | M | I | MI | probably damaging |
| rs1061347 | NP_056386 | E | K | EK | benign            |
| rs1061348 | NP_056386 | G | C | GC | probably damaging |
| rs1061380 | NP_004376 | I | L | IL | benign            |
| rs1061382 | NP_150644 | E | K | EK | benign            |
| rs1061382 | NP_000964 | E | K | EK | benign            |
| rs1061409 | NP_065086 | V | I | VI | benign            |
| rs1061417 | NP_068819 | V | F | VF | benign            |
| rs1061417 | NP_068822 | V | F | VF | benign            |
| rs1061417 | NP_004952 | V | F | VF | benign            |
| rs1061417 | NP_068830 | V | F | VF | possibly damaging |
| rs1061436 | NP_055318 | E | Q | EQ | benign            |
| rs1061472 | NP_000044 | K | R | KR | benign            |
| rs1061489 | NP_003946 | H | Y | HY | probably damaging |
| rs1061493 | NP_002151 | L | V | LV | benign            |
| rs1061494 | NP_002151 | Q | R | QR | benign            |
| rs1061502 | NP_004022 | E | K | EK | benign            |
| rs1061502 | NP_001563 | K | E | KE | benign            |
| rs1061502 | NP_004020 | K | E | KE | benign            |
| rs1061518 | NP_004159 | F | V | FV | possibly damaging |
| rs1061519 | NP_004159 | D | E | DE | benign            |
| rs1061520 | NP_004159 | K | E | KE | benign            |
| rs1061522 | NP_689739 | Q | K | QK | benign            |
| rs1061522 | NP_995585 | Q | K | QK | benign            |
| rs1061534 | NP_060662 | F | L | FL | possibly damaging |
| rs1061542 | NP_005677 | E | V | EV | possibly damaging |
| rs1061543 | NP_000977 | L | F | LF | possibly damaging |
| rs1061604 | NP_000753 | N | S | NS | benign            |
| rs1061622 | NP_001057 | M | R | MR | benign            |
| rs1061679 | NP_006660 | P | L | PL | benign            |
| rs1061680 | NP_006660 | T | I | TI | benign            |
| rs1061681 | NP_006660 | I | S | IS | benign            |
| rs1061683 | NP_006660 | I | V | IV | benign            |
| rs1061687 | NP_003609 | R | G | RG | benign            |
| rs1061704 | NP_004468 | T | S | TS | benign            |



|           |           |   |   |    |                   |
|-----------|-----------|---|---|----|-------------------|
| rs1061738 | NP_066990 | P | L | PL | probably damaging |
| rs1061768 | XP_371174 | R | H | RH | benign            |
| rs1061769 | XP_371174 | C | Y | CY | benign            |
| rs1061780 | NP_003771 | P | S | PS | probably damaging |
| rs1061889 | NP_149119 | V | I | VI | benign            |
| rs1061945 | NP_005581 | V | A | VA | benign            |
| rs1061945 | NP_005582 | V | A | VA | benign            |
| rs1061954 | NP_005194 | H | Q | HQ | benign            |
| rs1061954 | NP_542988 | H | Q | HQ | benign            |
| rs1061954 | NP_542989 | H | Q | HQ | benign            |
| rs1061954 | NP_542990 | H | Q | HQ | benign            |
| rs1061954 | NP_542991 | H | Q | HQ | benign            |
| rs1061954 | NP_542993 | H | Q | HQ | benign            |
| rs1061954 | NP_542994 | H | Q | HQ | benign            |
| rs1061954 | NP_542995 | H | Q | HQ | benign            |
| rs1061954 | NP_542996 | H | Q | HQ | benign            |
| rs1061954 | NP_542997 | H | Q | HQ | benign            |
| rs1061954 | NP_542998 | H | Q | HQ | benign            |
| rs1061954 | NP_543000 | H | Q | HQ | benign            |
| rs1061954 | NP_543002 | H | Q | HQ | benign            |
| rs1061954 | NP_543003 | H | Q | HQ | benign            |
| rs1061954 | NP_543004 | H | Q | HQ | benign            |
| rs1061959 | NP_000596 | R | K | RK | benign            |
| rs1062049 | NP_624302 | T | I | TI | benign            |
| rs1062049 | NP_001870 | T | I | TI | possibly damaging |
| rs1062062 | NP_008994 | G | R | GR | benign            |
| rs1062087 | XP_375032 | V | I | VI | benign            |
| rs1062136 | NP_000681 | E | V | EV | benign            |
| rs1062154 | NP_055812 | G | A | GA | benign            |
| rs1062223 | XP_496282 | R | W | RW | possibly damaging |
| rs1062232 | NP_075379 | I | T | IT | possibly damaging |
| rs1062238 | NP_054876 | K | M | KM | benign            |
| rs1062366 | NP_000988 | H | P | HP | probably damaging |
| rs1062373 | NP_004784 | V | I | VI | benign            |
| rs1062398 | NP_001604 | H | P | HP | possibly damaging |
| rs1062400 | NP_115754 | V | M | VM | benign            |
| rs1062400 | NP_001951 | V | M | VM | benign            |
| rs1062401 | NP_115754 | V | E | VE | benign            |
| rs1062401 | NP_001951 | V | E | VE | benign            |
| rs1062403 | XP_498335 | T | P | TP | benign            |
| rs1062406 | NP_000983 | E | K | EK | benign            |
| rs1062412 | NP_775885 | D | N | DN | benign            |
| rs1062412 | NP_055102 | N | D | ND | benign            |
| rs1062413 | NP_055102 | M | V | MV | benign            |
| rs1062413 | NP_775885 | V | M | VM | benign            |
| rs1062418 | XP_371107 | E | G | EG | probably damaging |

|           |           |   |   |    |                   |
|-----------|-----------|---|---|----|-------------------|
| rs1062422 | XP_371023 | S | F | SF | benign            |
| rs1062429 | NP_002037 | K | N | KN | benign            |
| rs1062436 | NP_002037 | L | F | LF | benign            |
| rs1062438 | XP_371023 | S | F | SF | benign            |
| rs1062450 | XP_371023 | T | P | TP | probably damaging |
| rs1062458 | NP_000161 | H | Q | HQ | benign            |
| rs1062463 | NP_004167 | A | P | AP | possibly damaging |
| rs1062465 | NP_057279 | D | E | DE | benign            |
| rs1062468 | NP_004159 | V | I | VI | benign            |
| rs1062478 | NP_002005 | R | H | RH | possibly damaging |
| rs1062487 | NP_000893 | R | P | RP | benign            |
| rs1062487 | NP_009218 | R | P | RP | benign            |
| rs1062487 | NP_009219 | R | P | RP | benign            |
| rs1062487 | NP_009220 | R | P | RP | benign            |
| rs1062488 | NP_000893 | R | T | RT | benign            |
| rs1062488 | NP_009218 | R | T | RT | benign            |
| rs1062488 | NP_009219 | R | T | RT | benign            |
| rs1062488 | NP_009220 | R | T | RT | benign            |
| rs1062489 | NP_001494 | G | A | GA | benign            |
| rs1062489 | NP_803436 | G | A | GA | benign            |
| rs1062490 | NP_001494 | P | S | PS | benign            |
| rs1062490 | NP_803436 | P | S | PS | benign            |
| rs1062493 | NP_001494 | T | S | TS | benign            |
| rs1062496 | NP_001494 | I | V | IV | benign            |
| rs1062498 | NP_001494 | V | I | VI | benign            |
| rs1062501 | NP_001494 | H | R | HR | benign            |
| rs1062502 | NP_001494 | D | E | DE | benign            |
| rs1062503 | NP_001494 | V | M | VM | benign            |
| rs1062505 | NP_001494 | V | M | VM | benign            |
| rs1062507 | NP_060004 | L | I | LI | benign            |
| rs1062511 | NP_001494 | K | T | KT | benign            |
| rs1062512 | NP_001494 | K | N | KN | benign            |
| rs1062551 | NP_001957 | G | V | GV | benign            |
| rs1062552 | NP_001957 | R | I | RI | benign            |
| rs1062553 | NP_001957 | I | T | IT | benign            |
| rs1062555 | NP_001957 | G | A | GA | benign            |
| rs1062557 | NP_002082 | R | S | RS | benign            |
| rs1062563 | NP_066546 | A | V | AV | benign            |
| rs1062563 | NP_002164 | A | V | AV | benign            |
| rs1062570 | NP_002162 | N | H | NH | benign            |
| rs1062571 | NP_066546 | A | T | AT | benign            |
| rs1062573 | NP_066546 | V | M | VM | benign            |
| rs1062573 | NP_002162 | V | M | VM | benign            |
| rs1062574 | NP_066546 | S | F | SF | benign            |
| rs1062575 | NP_002162 | I | T | IT | benign            |
| rs1062575 | NP_066546 | T | I | TI | benign            |

|           |           |   |   |    |                   |
|-----------|-----------|---|---|----|-------------------|
| rs1062591 | NP_002439 | G | R | GR | benign            |
| rs1062592 | NP_002439 | E | A | EA | benign            |
| rs1062597 | NP_006563 | V | L | VL | benign            |
| rs1062608 | NP_003401 | A | T | AT | benign            |
| rs1062609 | NP_003373 | A | T | AT | benign            |
| rs1062633 | NP_002438 | R | G | RG | possibly damaging |
| rs1062656 | NP_054764 | P | R | PR | probably damaging |
| rs1062659 | NP_110379 | N | Y | NY | possibly damaging |
| rs1062660 | NP_110379 | N | I | NI | possibly damaging |
| rs1062695 | NP_663791 | F | L | FL | possibly damaging |
| rs1062695 | NP_004702 | F | L | FL | probably damaging |
| rs1062695 | NP_663783 | F | L | FL | probably damaging |
| rs1062703 | NP_056723 | P | L | PL | probably damaging |
| rs1062703 | NP_056669 | P | L | PL | probably damaging |
| rs1062703 | NP_002375 | P | L | PL | probably damaging |
| rs1062703 | NP_056671 | P | L | PL | probably damaging |
| rs1062713 | NP_006685 | K | R | KR | benign            |
| rs1062714 | NP_009215 | R | G | RG | probably damaging |
| rs1062720 | XP_370992 | A | E | AE | possibly damaging |
| rs1062724 | NP_998774 | S | A | SA | benign            |
| rs1062725 | NP_998774 | T | R | TR | possibly damaging |
| rs1062727 | NP_683723 | P | T | PT | benign            |
| rs1062727 | NP_055779 | P | T | PT | benign            |
| rs1062735 | NP_945189 | E | Q | EQ | benign            |
| rs1062735 | NP_004604 | E | Q | EQ | benign            |
| rs1062749 | NP_003938 | G | E | GE | possibly damaging |
| rs1062758 | NP_038474 | K | E | KE | benign            |
| rs1062760 | NP_038474 | E | Q | EQ | benign            |
| rs1062763 | NP_038474 | L | F | LF | benign            |
| rs1062765 | NP_038474 | M | K | MK | benign            |
| rs1062766 | NP_038474 | S | N | SN | benign            |
| rs1062768 | NP_038474 | R | H | RH | benign            |
| rs1062769 | NP_038474 | Y | F | YF | benign            |
| rs1062777 | NP_038474 | G | E | GE | benign            |
| rs1062778 | NP_038474 | A | T | AT | benign            |
| rs1062780 | NP_110384 | Q | K | QK | benign            |
| rs1062783 | NP_038474 | L | F | LF | benign            |
| rs1062786 | NP_038474 | V | A | VA | benign            |
| rs1062796 | NP_005964 | P | Q | PQ | benign            |
| rs1062798 | NP_036478 | S | T | ST | benign            |
| rs1062798 | NP_057637 | S | T | ST | benign            |
| rs1062798 | NP_714940 | S | T | ST | benign            |
| rs1062798 | NP_714941 | S | T | ST | benign            |
| rs1062800 | NP_036478 | E | V | EV | probably damaging |
| rs1062800 | NP_057637 | E | V | EV | probably damaging |
| rs1062800 | NP_714940 | E | V | EV | probably damaging |

|           |           |   |   |    |                   |
|-----------|-----------|---|---|----|-------------------|
| rs1062800 | NP_714941 | E | V | EV | probably damaging |
| rs1062809 | NP_037541 | S | Y | SY | possibly damaging |
| rs1062811 | NP_060294 | R | T | RT | possibly damaging |
| rs1062822 | NP_056986 | S | R | SR | benign            |
| rs1062823 | NP_056986 | E | G | EG | possibly damaging |
| rs1062832 | NP_002244 | A | T | AT | benign            |
| rs1062846 | NP_002902 | P | S | PS | probably damaging |
| rs1062849 | NP_003245 | S | F | SF | possibly damaging |
| rs1062862 | NP_003951 | G | S | GS | benign            |
| rs1062863 | NP_003951 | T | N | TN | benign            |
| rs1062864 | NP_003951 | A | G | AG | benign            |
| rs1062865 | NP_003951 | M | L | ML | benign            |
| rs1062866 | NP_003951 | C | Y | CY | benign            |
| rs1062868 | NP_003951 | A | D | AD | benign            |
| rs1062870 | NP_003951 | S | A | SA | benign            |
| rs1062871 | NP_003951 | K | Q | KQ | benign            |
| rs1062872 | NP_003951 | V | A | VA | benign            |
| rs1062873 | NP_003951 | S | R | SR | benign            |
| rs1062900 | NP_958815 | E | K | EK | benign            |
| rs1062904 | NP_036475 | S | A | SA | benign            |
| rs1062904 | NP_892022 | S | A | SA | benign            |
| rs1062913 | NP_009160 | F | V | FV | possibly damaging |
| rs1062914 | NP_005876 | P | L | PL | benign            |
| rs1062923 | NP_056536 | I | T | IT | benign            |
| rs1062926 | XP_498423 | H | Y | HY | probably damaging |
| rs1062928 | XP_497714 | D | E | DE | benign            |
| rs1062937 | NP_002245 | E | D | ED | benign            |
| rs1062941 | NP_036538 | H | Y | HY | possibly damaging |
| rs1062946 | NP_438169 | V | D | VD | possibly damaging |
| rs1062947 | NP_438169 | I | L | IL | benign            |
| rs1062956 | NP_877392 | V | G | VG | possibly damaging |
| rs1062961 | XP_495843 | S | N | SN | benign            |
| rs1062962 | XP_495843 | A | T | AT | benign            |
| rs1062963 | XP_495843 | Q | R | QR | possibly damaging |
| rs1062964 | NP_002344 | E | D | ED | benign            |
| rs1062978 | NP_005303 | G | D | GD | possibly damaging |
| rs1062978 | NP_941372 | G | D | GD | possibly damaging |
| rs1062981 | NP_003751 | V | I | VI | benign            |
| rs1063001 | NP_002775 | T | I | TI | benign            |
| rs1063070 | NP_004770 | F | L | FL | probably damaging |
| rs1063087 | NP_065155 | D | E | DE | benign            |
| rs1063107 | NP_006106 | M | L | ML | benign            |
| rs1063111 | NP_036370 | V | D | VD | possibly damaging |
| rs1063112 | NP_036370 | I | T | IT | possibly damaging |
| rs1063124 | NP_001646 | K | N | KN | benign            |
| rs1063129 | NP_000072 | E | G | EG | benign            |

|           |           |   |   |    |                   |
|-----------|-----------|---|---|----|-------------------|
| rs1063135 | NP_002879 | L | F | LF | benign            |
| rs1063135 | NP_996846 | L | F | LF | benign            |
| rs1063141 | NP_857634 | D | N | DN | benign            |
| rs1063141 | NP_857635 | D | N | DN | benign            |
| rs1063141 | NP_036226 | D | N | DN | possibly damaging |
| rs1063154 | NP_004501 | S | A | SA | benign            |
| rs1063154 | NP_536349 | S | A | SA | benign            |
| rs1063154 | NP_004500 | S | A | SA | benign            |
| rs1063155 | NP_060082 | P | A | PA | possibly damaging |
| rs1063156 | NP_003420 | A | T | AT | benign            |
| rs1063157 | NP_000926 | D | H | DH | possibly damaging |
| rs1063157 | NP_891988 | H | D | HD | possibly damaging |
| rs1063159 | NP_006143 | L | W | LW | possibly damaging |
| rs1063191 | NP_066021 | H | N | HN | benign            |
| rs1063199 | NP_001633 | E | K | EK | benign            |
| rs1063201 | NP_001633 | D | E | DE | benign            |
| rs1063217 | NP_055752 | M | I | MI | benign            |
| rs1063236 | NP_004437 | H | Q | HQ | benign            |
| rs1063239 | NP_000448 | P | S | PS | benign            |
| rs1063239 | NP_849180 | P | S | PS | benign            |
| rs1063242 | NP_005742 | P | S | PS | benign            |
| rs1063242 | NP_671714 | P | S | PS | benign            |
| rs1063242 | NP_671700 | P | S | PS | benign            |
| rs1063251 | NP_006577 | M | K | MK | probably damaging |
| rs1063252 | NP_006577 | M | I | MI | possibly damaging |
| rs1063257 | NP_003742 | D | E | DE | benign            |
| rs1063257 | NP_874371 | D | E | DE | benign            |
| rs1063261 | NP_001449 | K | R | KR | benign            |
| rs1063262 | NP_001449 | P | R | PR | benign            |
| rs1063273 | NP_002762 | T | S | TS | benign            |
| rs1063276 | NP_150232 | F | Y | FY | benign            |
| rs1063278 | NP_150232 | S | T | ST | benign            |
| rs1063287 | NP_872620 | S | R | SR | possibly damaging |
| rs1063287 | NP_056405 | S | R | SR | possibly damaging |
| rs1063288 | NP_872620 | D | E | DE | benign            |
| rs1063288 | NP_056405 | D | E | DE | benign            |
| rs1063307 | NP_003478 | E | D | ED | benign            |
| rs1063307 | NP_631961 | E | D | ED | benign            |
| rs1063310 | NP_055026 | F | L | FL | benign            |
| rs1063317 | NP_006488 | G | R | GR | possibly damaging |
| rs1063324 | NP_003414 | E | K | EK | benign            |
| rs1063327 | NP_003414 | P | S | PS | benign            |
| rs1063328 | NP_036444 | F | L | FL | benign            |
| rs1063330 | NP_002197 | F | L | FL | benign            |
| rs1063354 | NP_004312 | D | N | DN | possibly damaging |
| rs1063385 | NP_003968 | V | L | VL | benign            |

|           |           |   |   |    |                   |
|-----------|-----------|---|---|----|-------------------|
| rs1063401 | NP_000287 | Q | E | QE | benign            |
| rs1063403 | NP_000287 | M | V | MV | possibly damaging |
| rs1063405 | NP_000287 | R | H | RH | possibly damaging |
| rs1063409 | NP_002572 | F | L | FL | benign            |
| rs1063412 | NP_714969 | P | S | PS | probably damaging |
| rs1063413 | NP_006709 | D | V | DV | benign            |
| rs1063423 | NP_003913 | L | F | LF | benign            |
| rs1063424 | NP_003913 | D | A | DA | benign            |
| rs1063445 | NP_938149 | R | C | RC | probably damaging |
| rs1063445 | NP_055425 | R | C | RC | probably damaging |
| rs1063445 | NP_938148 | R | C | RC | probably damaging |
| rs1063447 | NP_000680 | F | Y | FY | probably damaging |
| rs1063455 | NP_116116 | T | S | TS | possibly damaging |
| rs1063456 | NP_116116 | D | H | DH | benign            |
| rs1063457 | NP_116116 | S | A | SA | benign            |
| rs1063458 | NP_116116 | E | D | ED | benign            |
| rs1063459 | NP_116116 | E | Q | EQ | benign            |
| rs1063468 | NP_054778 | E | K | EK | benign            |
| rs1063469 | NP_000468 | K | E | KE | benign            |
| rs1063478 | NP_006111 | V | I | VI | benign            |
| rs1063479 | NP_002655 | K | R | KR | benign            |
| rs1063485 | NP_987091 | H | N | HN | possibly damaging |
| rs1063493 | NP_000036 | E | Q | EQ | benign            |
| rs1063499 | NP_000578 | S | T | ST | benign            |
| rs1063502 | NP_000365 | G | S | GS | benign            |
| rs1063525 | NP_057452 | T | P | TP | benign            |
| rs1063531 | NP_003031 | E | V | EV | possibly damaging |
| rs1063535 | NP_002408 | P | L | PL | probably damaging |
| rs1063542 | NP_059447 | E | Q | EQ | benign            |
| rs1063543 | NP_001816 | S | A | SA | benign            |
| rs1063550 | NP_006479 | S | T | ST | benign            |
| rs1063551 | NP_006479 | S | I | SI | benign            |
| rs1063552 | NP_006479 | S | A | SA | benign            |
| rs1063553 | NP_006479 | C | W | CW | probably damaging |
| rs1063554 | NP_006479 | N | S | NS | benign            |
| rs1063560 | NP_002175 | L | V | LV | benign            |
| rs1063560 | NP_786943 | L | V | LV | benign            |
| rs1063562 | NP_065790 | A | V | AV | benign            |
| rs1063563 | NP_065790 | A | D | AD | possibly damaging |
| rs1063564 | NP_065790 | G | S | GS | benign            |
| rs1063565 | NP_065790 | G | D | GD | benign            |
| rs1063566 | NP_065790 | N | K | NK | benign            |
| rs1063567 | NP_065790 | H | R | HR | probably damaging |
| rs1063573 | NP_004534 | Q | E | QE | benign            |
| rs1063582 | NP_002309 | M | L | ML | benign            |
| rs1063607 | NP_954657 | T | P | TP | probably damaging |

|           |           |   |   |    |                   |
|-----------|-----------|---|---|----|-------------------|
| rs1063607 | NP_000215 | T | P | TP | probably damaging |
| rs1063616 | NP_054902 | S | R | SR | possibly damaging |
| rs1063623 | NP_065943 | S | Y | SY | possibly damaging |
| rs1063625 | NP_067613 | E | K | EK | benign            |
| rs1063625 | NP_000617 | E | K | EK | benign            |
| rs1063627 | NP_996742 | Q | K | QK | benign            |
| rs1063627 | NP_996743 | Q | K | QK | benign            |
| rs1063627 | NP_996744 | Q | K | QK | benign            |
| rs1063627 | NP_008928 | Q | K | QK | benign            |
| rs1063646 | NP_054787 | P | L | PL | probably damaging |
| rs1063651 | NP_981956 | D | Y | DY | probably damaging |
| rs1063669 | NP_765975 | G | S | GS | benign            |
| rs1063669 | NP_765977 | G | S | GS | benign            |
| rs1063669 | NP_765978 | G | S | GS | benign            |
| rs1063669 | NP_006153 | G | S | GS | benign            |
| rs1063731 | NP_055738 | S | G | SG | benign            |
| rs1063739 | NP_005300 | H | N | HN | benign            |
| rs1063757 | NP_075389 | M | R | MR | benign            |
| rs1063757 | NP_075390 | R | M | RM | probably damaging |
| rs1063759 | NP_075389 | G | V | GV | benign            |
| rs1063763 | NP_075389 | T | A | TA | possibly damaging |
| rs1063765 | NP_075389 | M | T | MT | benign            |
| rs1063767 | NP_075389 | L | M | LM | benign            |
| rs1063769 | NP_075389 | R | H | RH | benign            |
| rs1063770 | NP_075389 | M | T | MT | benign            |
| rs1063771 | NP_075389 | R | H | RH | possibly damaging |
| rs1063772 | NP_075389 | R | C | RC | benign            |
| rs1063773 | NP_075389 | R | H | RH | benign            |
| rs1063774 | NP_075389 | N | T | NT | benign            |
| rs1063775 | NP_075389 | R | C | RC | benign            |
| rs1063776 | NP_075389 | Q | E | QE | benign            |
| rs1063777 | NP_075389 | R | W | RW | probably damaging |
| rs1063779 | NP_075389 | A | T | AT | benign            |
| rs1063780 | NP_075389 | K | R | KR | benign            |
| rs1063781 | NP_075389 | S | T | ST | benign            |
| rs1063795 | NP_075389 | A | G | AG | benign            |
| rs1063796 | NP_075389 | R | W | RW | probably damaging |
| rs1063798 | NP_075389 | V | F | VF | benign            |
| rs1063798 | NP_075390 | F | V | FV | possibly damaging |
| rs1063809 | NP_057705 | A | T | AT | benign            |
| rs1063810 | NP_057705 | A | G | AG | benign            |
| rs1063831 | NP_003288 | L | Q | LQ | benign            |
| rs1063834 | NP_112570 | I | T | IT | benign            |
| rs1063852 | NP_038471 | N | S | NS | benign            |
| rs1063856 | NP_000543 | T | A | TA | benign            |
| rs1063897 | NP_006485 | R | P | RP | probably damaging |

|           |           |   |   |    |                   |
|-----------|-----------|---|---|----|-------------------|
| rs1063910 | NP_057564 | L | M | LM | benign            |
| rs1063926 | NP_002463 | G | E | GE | probably damaging |
| rs1063927 | NP_002463 | Q | K | QK | benign            |
| rs1063928 | NP_002851 | T | P | TP | benign            |
| rs1063933 | NP_002956 | E | K | EK | benign            |
| rs1063955 | NP_148934 | A | T | AT | benign            |
| rs1063955 | NP_003880 | A | T | AT | benign            |
| rs1063955 | NP_071285 | A | T | AT | benign            |
| rs1063967 | NP_004413 | G | E | GE | possibly damaging |
| rs1063975 | XP_371401 | K | N | KN | benign            |
| rs1063993 | NP_511043 | D | Y | DY | probably damaging |
| rs1063997 | NP_005221 | A | V | AV | benign            |
| rs1063998 | NP_005221 | A | V | AV | benign            |
| rs1063999 | NP_005221 | Q | E | QE | benign            |
| rs1064000 | NP_005221 | T | R | TR | possibly damaging |
| rs1064004 | NP_006006 | Q | L | QL | benign            |
| rs1064008 | NP_006081 | C | F | CF | probably damaging |
| rs1064010 | NP_115746 | P | S | PS | benign            |
| rs1064074 | NP_710142 | E | D | ED | benign            |
| rs1064110 | NP_998827 | Q | H | QH | benign            |
| rs1064110 | NP_003141 | Q | H | QH | possibly damaging |
| rs1064110 | NP_644805 | Q | H | QH | possibly damaging |
| rs1064116 | NP_003141 | F | Y | FY | probably damaging |
| rs1064116 | NP_998827 | F | Y | FY | probably damaging |
| rs1064116 | NP_644805 | F | Y | FY | probably damaging |
| rs1064122 | NP_003141 | R | S | RS | probably damaging |
| rs1064122 | NP_998827 | R | S | RS | probably damaging |
| rs1064122 | NP_644805 | R | S | RS | probably damaging |
| rs1064177 | NP_002204 | T | A | TA | possibly damaging |
| rs1064178 | NP_008863 | G | D | GD | benign            |
| rs1064178 | NP_599031 | G | D | GD | benign            |
| rs1064178 | NP_599032 | G | D | GD | benign            |
| rs1064195 | NP_004143 | I | F | IF | possibly damaging |
| rs1064199 | NP_996318 | V | F | VF | benign            |
| rs1064204 | NP_056374 | P | T | PT | possibly damaging |
| rs1064213 | NP_006217 | V | I | VI | benign            |
| rs1064218 | NP_036423 | C | R | CR | probably damaging |
| rs1064219 | NP_036423 | C | Y | CY | probably damaging |
| rs1064226 | NP_003857 | F | Y | FY | benign            |
| rs1064227 | NP_003857 | T | P | TP | benign            |
| rs1064236 | NP_073594 | I | T | IT | benign            |
| rs1064238 | NP_006448 | L | S | LS | possibly damaging |
| rs1064251 | NP_005572 | G | E | GE | probably damaging |
| rs1064252 | NP_002939 | H | P | HP | probably damaging |
| rs1064274 | NP_003657 | R | Q | RQ | possibly damaging |
| rs1064275 | NP_055472 | A | T | AT | benign            |



|           |           |   |   |    |                   |
|-----------|-----------|---|---|----|-------------------|
| rs1064293 | NP_570923 | G | R | GR | probably damaging |
| rs1064293 | NP_570924 | G | R | GR | probably damaging |
| rs1064293 | NP_570925 | G | R | GR | probably damaging |
| rs1064293 | NP_002841 | G | R | GR | probably damaging |
| rs1064295 | NP_570924 | A | V | AV | benign            |
| rs1064295 | NP_002841 | A | V | AV | benign            |
| rs1064298 | NP_570923 | S | F | SF | benign            |
| rs1064298 | NP_570925 | S | F | SF | benign            |
| rs1064298 | NP_570924 | S | F | SF | probably damaging |
| rs1064298 | NP_002841 | S | F | SF | probably damaging |
| rs1064301 | NP_570923 | N | K | NK | benign            |
| rs1064301 | NP_570925 | N | K | NK | benign            |
| rs1064301 | NP_570924 | N | K | NK | probably damaging |
| rs1064301 | NP_002841 | N | K | NK | probably damaging |
| rs1064307 | NP_004136 | Y | H | YH | benign            |
| rs1064319 | NP_848594 | I | V | IV | benign            |
| rs1064364 | NP_003897 | K | N | KN | benign            |
| rs1064365 | NP_976028 | E | G | EG | benign            |
| rs1064365 | NP_005340 | E | G | EG | benign            |
| rs1064365 | NP_056958 | E | G | EG | benign            |
| rs1064365 | NP_976029 | E | G | EG | benign            |
| rs1064371 | NP_976028 | Y | D | YD | benign            |
| rs1064371 | NP_005340 | Y | D | YD | benign            |
| rs1064371 | NP_056958 | Y | D | YD | benign            |
| rs1064371 | NP_976029 | Y | D | YD | benign            |
| rs1064372 | NP_976028 | K | E | KE | benign            |
| rs1064372 | NP_005340 | K | E | KE | benign            |
| rs1064372 | NP_056958 | K | E | KE | benign            |
| rs1064372 | NP_976029 | K | E | KE | benign            |
| rs1064376 | NP_976028 | D | H | DH | benign            |
| rs1064376 | NP_005340 | D | H | DH | benign            |
| rs1064376 | NP_056958 | D | H | DH | benign            |
| rs1064376 | NP_976029 | D | H | DH | benign            |
| rs1064377 | NP_079087 | A | P | AP | benign            |
| rs1064381 | NP_976028 | I | V | IV | benign            |
| rs1064381 | NP_005340 | I | V | IV | benign            |
| rs1064381 | NP_056958 | I | V | IV | benign            |
| rs1064381 | NP_976029 | I | V | IV | benign            |
| rs1064384 | NP_976028 | R | Q | RQ | benign            |
| rs1064384 | NP_005340 | R | Q | RQ | benign            |
| rs1064384 | NP_056958 | R | Q | RQ | benign            |
| rs1064384 | NP_976029 | R | Q | RQ | benign            |
| rs1064387 | NP_976028 | P | S | PS | benign            |
| rs1064387 | NP_005340 | P | S | PS | benign            |
| rs1064387 | NP_056958 | P | S | PS | benign            |
| rs1064387 | NP_976029 | P | S | PS | benign            |

|           |           |   |   |    |                   |
|-----------|-----------|---|---|----|-------------------|
| rs1064388 | NP_004377 | N | Y | NY | probably damaging |
| rs1064389 | NP_004377 | V | A | VA | benign            |
| rs1064401 | NP_976028 | P | A | PA | benign            |
| rs1064401 | NP_005340 | P | A | PA | benign            |
| rs1064401 | NP_056958 | P | A | PA | benign            |
| rs1064401 | NP_976029 | P | A | PA | benign            |
| rs1064402 | NP_976028 | A | V | AV | benign            |
| rs1064402 | NP_005340 | A | V | AV | benign            |
| rs1064402 | NP_056958 | A | V | AV | benign            |
| rs1064402 | NP_976029 | A | V | AV | benign            |
| rs1064403 | NP_976028 | R | Q | RQ | benign            |
| rs1064403 | NP_005340 | R | Q | RQ | benign            |
| rs1064403 | NP_056958 | R | Q | RQ | benign            |
| rs1064403 | NP_976029 | R | Q | RQ | benign            |
| rs1064404 | NP_976028 | N | S | NS | benign            |
| rs1064404 | NP_005340 | N | S | NS | benign            |
| rs1064404 | NP_056958 | N | S | NS | benign            |
| rs1064404 | NP_976029 | N | S | NS | benign            |
| rs1064405 | NP_976028 | Q | H | QH | benign            |
| rs1064405 | NP_005340 | Q | H | QH | benign            |
| rs1064405 | NP_056958 | Q | H | QH | benign            |
| rs1064405 | NP_976029 | Q | H | QH | benign            |
| rs1064418 | NP_064455 | H | Q | HQ | probably damaging |
| rs1064419 | NP_064455 | A | V | AV | benign            |
| rs1064420 | XP_018487 | M | V | MV | benign            |
| rs1064421 | NP_064455 | N | S | NS | benign            |
| rs1064422 | NP_064455 | P | L | PL | probably damaging |
| rs1064425 | NP_064455 | P | L | PL | benign            |
| rs1064428 | NP_005076 | A | D | AD | benign            |
| rs1064445 | NP_004443 | S | N | SN | benign            |
| rs1064451 | NP_006370 | S | T | ST | benign            |
| rs1064458 | NP_000193 | F | S | FS | possibly damaging |
| rs1064468 | NP_004730 | V | M | VM | benign            |
| rs1064478 | NP_008836 | T | P | TP | benign            |
| rs1064479 | NP_008836 | T | A | TA | benign            |
| rs1064480 | NP_008836 | R | K | RK | benign            |
| rs1064481 | NP_008836 | G | R | GR | benign            |
| rs1064493 | NP_036350 | D | H | DH | benign            |
| rs1064493 | NP_004507 | D | H | DH | benign            |
| rs1064493 | NP_703194 | D | H | DH | benign            |
| rs1064494 | NP_036350 | G | C | GC | benign            |
| rs1064494 | NP_004507 | G | C | GC | probably damaging |
| rs1064494 | NP_703194 | G | C | GC | probably damaging |
| rs1064512 | NP_003029 | G | R | GR | benign            |
| rs1064524 | NP_002200 | W | R | WR | possibly damaging |
| rs1064527 | NP_757349 | D | Y | DY | benign            |

|           |           |   |   |    |                   |
|-----------|-----------|---|---|----|-------------------|
| rs1064527 | NP_757350 | D | Y | DY | benign            |
| rs1064527 | NP_757351 | D | Y | DY | benign            |
| rs1064533 | NP_114438 | C | W | CW | possibly damaging |
| rs1064542 | NP_150644 | D | N | DN | possibly damaging |
| rs1064542 | NP_000964 | D | N | DN | possibly damaging |
| rs1064545 | NP_001247 | K | E | KE | benign            |
| rs1064562 | NP_004850 | L | H | LH | possibly damaging |
| rs1064567 | NP_001717 | K | T | KT | benign            |
| rs1064567 | NP_997072 | K | T | KT | benign            |
| rs1064568 | NP_001717 | Q | P | QP | benign            |
| rs1064568 | NP_997072 | Q | P | QP | benign            |
| rs1064570 | NP_001717 | Q | P | QP | benign            |
| rs1064570 | NP_997072 | Q | P | QP | benign            |
| rs1064573 | NP_060126 | C | S | CS | probably damaging |
| rs1064579 | NP_005525 | V | G | VG | benign            |
| rs1064580 | XP_496372 | D | V | DV | benign            |
| rs1064590 | NP_683866 | R | L | RL | benign            |
| rs1064590 | NP_683867 | R | L | RL | benign            |
| rs1064590 | NP_683868 | R | L | RL | benign            |
| rs1064590 | NP_683871 | R | L | RL | benign            |
| rs1064590 | NP_003781 | R | L | RL | benign            |
| rs1064591 | NP_002116 | D | E | DE | benign            |
| rs1064591 | NP_002115 | Q | H | QH | possibly damaging |
| rs1064595 | NP_002115 | Y | D | YD | probably damaging |
| rs1064595 | NP_072049 | Y | D | YD | probably damaging |
| rs1064595 | NP_002116 | Y | D | YD | probably damaging |
| rs1064601 | NP_004855 | R | G | RG | possibly damaging |
| rs1064608 | NP_055157 | P | A | PA | probably damaging |
| rs1064610 | NP_036193 | T | S | TS | benign            |
| rs1064610 | NP_036192 | T | S | TS | benign            |
| rs1064610 | NP_005681 | T | S | TS | benign            |
| rs1064643 | NP_000148 | T | A | TA | benign            |
| rs1064644 | NP_000148 | S | P | SP | benign            |
| rs1064648 | NP_000148 | R | H | RH | benign            |
| rs1064651 | NP_000148 | D | H | DH | possibly damaging |
| rs1064682 | NP_808220 | T | P | TP | possibly damaging |
| rs1064688 | NP_005613 | S | R | SR | possibly damaging |
| rs1064700 | NP_037530 | T | I | TI | possibly damaging |
| rs1064718 | NP_683711 | H | Y | HY | benign            |
| rs1064718 | NP_683710 | H | Y | HY | benign            |
| rs1064728 | NP_000985 | L | V | LV | benign            |
| rs1064733 | NP_001088 | T | R | TR | benign            |
| rs1064734 | NP_001088 | V | L | VL | benign            |
| rs1064735 | NP_001088 | L | F | LF | benign            |
| rs1064738 | NP_001088 | R | P | RP | possibly damaging |
| rs1064751 | NP_005619 | Q | L | QL | probably damaging |

|           |           |   |   |    |                   |
|-----------|-----------|---|---|----|-------------------|
| rs1064766 | XP_208300 | A | V | AV | benign            |
| rs1064770 | NP_077078 | R | Q | RQ | benign            |
| rs1064770 | NP_003285 | R | Q | RQ | benign            |
| rs1064771 | NP_077078 | V | A | VA | benign            |
| rs1064771 | NP_003285 | V | A | VA | benign            |
| rs1064774 | NP_077078 | T | I | TI | benign            |
| rs1064774 | NP_003285 | T | I | TI | benign            |
| rs1064775 | NP_077078 | A | T | AT | benign            |
| rs1064775 | NP_003285 | A | T | AT | benign            |
| rs1064776 | NP_077078 | A | V | AV | benign            |
| rs1064776 | NP_003285 | A | V | AV | benign            |
| rs1064779 | NP_077078 | V | I | VI | benign            |
| rs1064779 | NP_003285 | V | I | VI | benign            |
| rs1064780 | NP_077078 | H | R | HR | benign            |
| rs1064780 | NP_003285 | H | R | HR | benign            |
| rs1064781 | NP_077078 | T | I | TI | possibly damaging |
| rs1064781 | NP_003285 | T | I | TI | possibly damaging |
| rs1064815 | NP_000042 | Q | L | QL | probably damaging |
| rs1064816 | NP_001447 | V | A | VA | benign            |
| rs1064817 | NP_001447 | F | L | FL | probably damaging |
| rs1064823 | NP_006000 | S | T | ST | benign            |
| rs1064836 | NP_114106 | T | I | TI | benign            |
| rs1064845 | NP_066918 | S | N | SN | benign            |
| rs1064880 | NP_001276 | Q | H | QH | benign            |
| rs1064881 | NP_001276 | I | L | IL | benign            |
| rs1064907 | NP_001988 | T | P | TP | possibly damaging |
| rs1064911 | NP_005924 | Q | E | QE | benign            |
| rs1064913 | NP_976032 | H | Q | HQ | benign            |
| rs1064914 | NP_002776 | I | T | IT | benign            |
| rs1064914 | NP_976032 | I | T | IT | possibly damaging |
| rs1064934 | NP_112536 | S | N | SN | benign            |
| rs1064936 | NP_112536 | V | A | VA | benign            |
| rs1064937 | NP_112536 | T | R | TR | benign            |
| rs1064961 | NP_852469 | G | V | GV | possibly damaging |
| rs1064961 | NP_005641 | G | V | GV | possibly damaging |
| rs1064967 | NP_005956 | V | M | VM | benign            |
| rs1064967 | NP_444254 | V | M | VM | benign            |
| rs1064967 | NP_444255 | V | M | VM | benign            |
| rs1064967 | NP_444256 | V | M | VM | benign            |
| rs1064967 | NP_444257 | V | M | VM | benign            |
| rs1064967 | NP_444258 | V | M | VM | benign            |
| rs1064967 | NP_444253 | V | M | VM | benign            |
| rs1065022 | NP_005956 | L | H | LH | benign            |
| rs1065022 | NP_444254 | L | H | LH | benign            |
| rs1065022 | NP_444256 | L | H | LH | benign            |
| rs1065022 | NP_444260 | L | H | LH | benign            |

|           |           |   |   |    |                   |
|-----------|-----------|---|---|----|-------------------|
| rs1065022 | NP_444259 | L | H | LH | benign            |
| rs1065022 | NP_444253 | L | H | LH | benign            |
| rs1065028 | NP_005444 | V | L | VL | benign            |
| rs1065038 | NP_057336 | N | Y | NY | possibly damaging |
| rs1065039 | NP_057336 | S | C | SC | benign            |
| rs1065064 | XP_496394 | F | C | FC | probably damaging |
| rs1065065 | NP_001988 | K | T | KT | probably damaging |
| rs1065074 | NP_689410 | K | T | KT | benign            |
| rs1065074 | NP_689409 | K | T | KT | benign            |
| rs1065075 | NP_005922 | E | K | EK | benign            |
| rs1065076 | NP_005922 | A | T | AT | benign            |
| rs1065079 | NP_005018 | Q | H | QH | possibly damaging |
| rs1065115 | NP_000415 | R | S | RS | benign            |
| rs1065126 | NP_115534 | L | S | LS | benign            |
| rs1065126 | NP_683881 | L | S | LS | benign            |
| rs1065126 | NP_683738 | L | S | LS | benign            |
| rs1065135 | NP_683881 | Y | C | YC | probably damaging |
| rs1065136 | NP_663620 | P | T | PT | benign            |
| rs1065136 | NP_115534 | Q | K | QK | benign            |
| rs1065136 | NP_683738 | Q | K | QK | benign            |
| rs1065136 | NP_684281 | Q | K | QK | benign            |
| rs1065162 | NP_060802 | R | Q | RQ | benign            |
| rs1065170 | NP_115500 | R | Q | RQ | benign            |
| rs1065177 | NP_060621 | L | V | LV | benign            |
| rs1065191 | NP_001043 | T | N | TN | possibly damaging |
| rs1065197 | NP_006780 | E | K | EK | benign            |
| rs1065205 | NP_008850 | T | A | TA | benign            |
| rs1065267 | NP_060866 | E | K | EK | possibly damaging |
| rs1065315 | NP_115754 | C | R | CR | probably damaging |
| rs1065315 | NP_001951 | C | R | CR | probably damaging |
| rs1065316 | NP_005575 | S | P | SP | possibly damaging |
| rs1065320 | NP_115754 | V | E | VE | benign            |
| rs1065320 | NP_001951 | V | E | VE | benign            |
| rs1065321 | NP_115754 | E | K | EK | benign            |
| rs1065321 | NP_001951 | E | K | EK | benign            |
| rs1065329 | XP_085722 | L | P | LP | benign            |
| rs1065329 | NP_006461 | L | P | LP | possibly damaging |
| rs1065330 | NP_006461 | S | N | SN | benign            |
| rs1065330 | XP_085722 | S | N | SN | benign            |
| rs1065331 | NP_037421 | R | S | RS | benign            |
| rs1065332 | NP_005871 | G | C | GC | benign            |
| rs1065351 | NP_954629 | L | F | LF | benign            |
| rs1065358 | NP_001211 | S | F | SF | probably damaging |
| rs1065358 | NP_742075 | S | F | SF | probably damaging |
| rs1065358 | NP_742076 | S | F | SF | probably damaging |
| rs1065358 | NP_742077 | S | F | SF | probably damaging |

|           |           |   |   |    |                   |
|-----------|-----------|---|---|----|-------------------|
| rs1065358 | NP_742078 | S | F | SF | probably damaging |
| rs1065358 | NP_742079 | S | F | SF | probably damaging |
| rs1065358 | NP_742080 | S | F | SF | probably damaging |
| rs1065358 | NP_742081 | S | F | SF | probably damaging |
| rs1065367 | NP_005505 | R | Q | RQ | possibly damaging |
| rs1065381 | NP_078900 | A | T | AT | benign            |
| rs1065392 | NP_742094 | Q | R | QR | benign            |
| rs1065392 | NP_742093 | Q | R | QR | benign            |
| rs1065392 | NP_473361 | Q | R | QR | benign            |
| rs1065393 | NP_742094 | I | V | IV | benign            |
| rs1065393 | NP_742093 | I | V | IV | benign            |
| rs1065393 | NP_473361 | I | V | IV | benign            |
| rs1065395 | NP_006566 | P | T | PT | probably damaging |
| rs1065395 | NP_942089 | P | T | PT | probably damaging |
| rs1065411 | NP_000552 | K | N | KN | benign            |
| rs1065422 | NP_064445 | S | Y | SY | benign            |
| rs1065425 | NP_000504 | T | I | TI | possibly damaging |
| rs1065440 | NP_064445 | A | P | AP | benign            |
| rs1065441 | NP_000504 | F | Y | FY | benign            |
| rs1065442 | NP_005205 | M | T | MT | possibly damaging |
| rs1065445 | NP_002636 | L | M | LM | benign            |
| rs1065446 | NP_002636 | V | D | VD | probably damaging |
| rs1065457 | NP_112155 | Q | R | QR | benign            |
| rs1065480 | NP_004694 | S | Y | SY | possibly damaging |
| rs1065489 | NP_000177 | E | D | ED | benign            |
| rs1065499 | NP_031371 | P | S | PS | benign            |
| rs1065503 | NP_004630 | A | G | AG | benign            |
| rs1065503 | NP_542434 | A | G | AG | benign            |
| rs1065504 | NP_002773 | V | A | VA | benign            |
| rs1065505 | NP_002773 | I | T | IT | benign            |
| rs1065507 | NP_002773 | L | W | LW | possibly damaging |
| rs1065508 | NP_002773 | L | M | LM | benign            |
| rs1065509 | NP_002773 | N | S | NS | benign            |
| rs1065511 | NP_002773 | K | E | KE | benign            |
| rs1065512 | NP_002773 | I | T | IT | benign            |
| rs1065513 | NP_002773 | K | N | KN | benign            |
| rs1065515 | NP_002773 | A | T | AT | benign            |
| rs1065520 | NP_002773 | E | Q | EQ | benign            |
| rs1065522 | NP_002773 | D | Y | DY | benign            |
| rs1065524 | XP_496314 | K | N | KN | benign            |
| rs1065524 | NP_002773 | N | K | NK | benign            |
| rs1065530 | NP_009098 | M | T | MT | probably damaging |
| rs1065531 | NP_009098 | G | A | GA | benign            |
| rs1065569 | NP_000097 | V | M | VM | benign            |
| rs1065581 | NP_075258 | V | G | VG | probably damaging |
| rs1065581 | NP_075263 | V | G | VG | probably damaging |

|           |           |   |   |    |                   |
|-----------|-----------|---|---|----|-------------------|
| rs1065581 | NP_075265 | V | G | VG | probably damaging |
| rs1065581 | NP_075419 | V | G | VG | probably damaging |
| rs1065581 | NP_075420 | V | G | VG | probably damaging |
| rs1065581 | NP_075264 | V | G | VG | probably damaging |
| rs1065582 | NP_075258 | Q | K | QK | benign            |
| rs1065582 | NP_075263 | Q | K | QK | benign            |
| rs1065582 | NP_075265 | Q | K | QK | benign            |
| rs1065582 | NP_075419 | Q | K | QK | benign            |
| rs1065582 | NP_075420 | Q | K | QK | benign            |
| rs1065582 | NP_075264 | Q | K | QK | benign            |
| rs1065599 | NP_009035 | R | S | RS | probably damaging |
| rs1065611 | NP_002678 | Q | H | QH | benign            |
| rs1065617 | NP_002678 | E | D | ED | benign            |
| rs1065618 | NP_002678 | S | C | SC | benign            |
| rs1065619 | NP_002678 | Q | H | QH | benign            |
| rs1065622 | NP_002678 | Q | H | QH | benign            |
| rs1065628 | NP_006061 | A | D | AD | possibly damaging |
| rs1065635 | NP_036350 | L | P | LP | possibly damaging |
| rs1065635 | NP_004507 | L | P | LP | possibly damaging |
| rs1065635 | NP_703194 | L | P | LP | possibly damaging |
| rs1065674 | NP_060700 | Q | R | QR | benign            |
| rs1065676 | NP_443109 | K | T | KT | possibly damaging |
| rs1065676 | NP_963836 | K | T | KT | possibly damaging |
| rs1065683 | NP_060085 | S | T | ST | benign            |
| rs1065699 | NP_000986 | A | V | AV | benign            |
| rs1065699 | NP_296374 | A | V | AV | benign            |
| rs1065701 | NP_000986 | Q | H | QH | benign            |
| rs1065701 | NP_296374 | Q | H | QH | benign            |
| rs1065718 | NP_006000 | I | V | IV | benign            |
| rs1065720 | NP_000984 | D | G | DG | benign            |
| rs1065733 | NP_001006 | K | N | KN | probably damaging |
| rs1065735 | NP_001006 | R | S | RS | probably damaging |
| rs1065736 | NP_001006 | N | D | ND | probably damaging |
| rs1065740 | NP_002037 | G | A | GA | possibly damaging |
| rs1065742 | NP_150254 | L | F | LF | possibly damaging |
| rs1065742 | NP_000968 | L | F | LF | possibly damaging |
| rs1065751 | NP_116559 | V | I | VI | benign            |
| rs1065751 | NP_002898 | V | I | VI | benign            |
| rs1065756 | NP_000687 | S | T | ST | benign            |
| rs1065757 | NP_000037 | V | M | VM | benign            |
| rs1065757 | NP_942002 | V | M | VM | benign            |
| rs1065761 | NP_003456 | A | G | AG | possibly damaging |
| rs1065764 | NP_001488 | R | W | RW | probably damaging |
| rs1065775 | NP_569707 | A | V | AV | benign            |
| rs1065775 | NP_002831 | A | V | AV | benign            |
| rs1065782 | NP_000587 | V | I | VI | benign            |

|           |           |   |   |    |                   |
|-----------|-----------|---|---|----|-------------------|
| rs1066924 | XP_377071 | P | L | PL | benign            |
| rs1066924 | XP_377072 | L | P | LP | probably damaging |
| rs1071545 | NP_004314 | R | G | RG | benign            |
| rs1071600 | NP_003794 | I | T | IT | possibly damaging |
| rs1071630 | NP_002113 | F | S | FS | benign            |
| rs1071632 | NP_116761 | Q | H | QH | benign            |
| rs1071632 | NP_116757 | Q | H | QH | benign            |
| rs1071632 | NP_116760 | Q | H | QH | benign            |
| rs1071632 | NP_001382 | Q | H | QH | benign            |
| rs1071632 | NP_001381 | Q | H | QH | benign            |
| rs1071632 | NP_001383 | Q | H | QH | possibly damaging |
| rs1071658 | NP_115719 | H | Q | HQ | benign            |
| rs1071682 | NP_057522 | S | N | SN | benign            |
| rs1071707 | NP_008836 | R | H | RH | benign            |
| rs1071816 | NP_005505 | Y | S | YS | probably damaging |
| rs1071817 | NP_005505 | Q | K | QK | probably damaging |
| rs1071835 | NP_998839 | R | G | RG | benign            |
| rs1073123 | NP_000359 | M | T | MT | benign            |
| rs1075108 | NP_006171 | G | V | GV | probably damaging |
| rs1075356 | XP_371230 | S | L | SL | possibly damaging |
| rs1075935 | NP_054781 | Y | F | YF | benign            |
| rs1076277 | XP_376720 | R | C | RC | probably damaging |
| rs1076455 | XP_497792 | Y | C | YC | benign            |
| rs1076488 | XP_032996 | D | N | DN | benign            |
| rs1076669 | NP_001388 | T | I | TI | benign            |
| rs1076827 | NP_006286 | P | L | PL | probably damaging |
| rs1077126 | XP_291806 | T | A | TA | benign            |
| rs1077841 | NP_005954 | R | C | RC | probably damaging |
| rs1078018 | NP_057263 | E | K | EK | benign            |
| rs1078327 | NP_071445 | R | C | RC | probably damaging |
| rs1078456 | XP_036988 | D | N | DN | benign            |
| rs1078461 | XP_373043 | L | V | LV | benign            |
| rs1078543 | NP_060354 | S | C | SC | benign            |
| rs1078761 | NP_149974 | I | V | IV | benign            |
| rs1078846 | NP_004794 | S | L | SL | benign            |
| rs1078890 | NP_839943 | H | Y | HY | probably damaging |
| rs1079109 | NP_002146 | L | F | LF | probably damaging |
| rs1079555 | XP_047462 | K | N | KN | benign            |
| rs1079556 | XP_047462 | V | E | VE | benign            |
| rs1079557 | XP_047462 | G | R | GR | possibly damaging |
| rs1079610 | NP_150598 | T | I | TI | benign            |
| rs1095423 | NP_056346 | Y | C | YC | probably damaging |
| rs1104899 | NP_689704 | R | W | RW | benign            |
| rs1105168 | NP_001438 | P | L | PL | probably damaging |
| rs1105222 | NP_775960 | A | G | AG | benign            |
| rs1105223 | NP_775960 | T | M | TM | benign            |



|           |           |   |   |    |                   |
|-----------|-----------|---|---|----|-------------------|
| rs1105273 | NP_689996 | A | V | AV | benign            |
| rs1105353 | NP_061937 | T | N | TN | benign            |
| rs1105879 | NP_001063 | R | S | RS | benign            |
| rs1105929 | XP_370944 | T | I | TI | benign            |
| rs1106042 | NP_004755 | K | R | KR | benign            |
| rs1106194 | NP_076987 | A | T | AT | benign            |
| rs1106639 | NP_689996 | V | I | VI | benign            |
| rs1107413 | NP_067026 | V | L | VL | benign            |
| rs1107947 | NP_689642 | V | E | VE | benign            |
| rs1108134 | XP_058721 | E | K | EK | benign            |
| rs1108758 | NP_064716 | D | G | DG | possibly damaging |
| rs1109552 | XP_294357 | I | V | IV | benign            |
| rs1109643 | NP_114105 | T | M | TM | benign            |
| rs1110061 | NP_004950 | G | A | GA | benign            |
| rs1110337 | NP_919247 | E | K | EK | benign            |
| rs1110337 | NP_079402 | E | K | EK | benign            |
| rs1110400 | NP_002377 | T | I | TI | probably damaging |
| rs1110627 | NP_982353 | L | P | LP | benign            |
| rs1110627 | NP_058637 | L | P | LP | possibly damaging |
| rs1110707 | NP_060689 | A | T | AT | benign            |
| rs1110719 | NP_036423 | K | M | KM | benign            |
| rs1110977 | NP_057658 | T | A | TA | possibly damaging |
| rs1110977 | NP_000786 | T | A | TA | possibly damaging |
| rs1111032 | NP_071753 | G | E | GE | probably damaging |
| rs1111067 | XP_051081 | G | R | GR | possibly damaging |
| rs1111168 | NP_002269 | E | D | ED | benign            |
| rs1111169 | NP_002269 | E | Q | EQ | benign            |
| rs1111335 | NP_079406 | R | W | RW | benign            |
| rs1112438 | NP_665698 | R | Q | RQ | possibly damaging |
| rs1113265 | NP_689843 | D | E | DE | benign            |
| rs1113557 | NP_006621 | T | R | TR | possibly damaging |
| rs1116540 | NP_945351 | Q | H | QH | possibly damaging |
| rs1122206 | NP_056540 | H | Q | HQ | probably damaging |
| rs1122326 | NP_149971 | Q | P | QP | benign            |
| rs1122444 | NP_997192 | P | S | PS | probably damaging |
| rs1122955 | NP_003424 | G | D | GD | possibly damaging |
| rs1123617 | NP_009094 | V | I | VI | benign            |
| rs1124164 | NP_006602 | S | P | SP | benign            |
| rs1124257 | XP_379908 | Y | S | YS | probably damaging |
| rs1124649 | NP_060197 | M | V | MV | benign            |
| rs1125488 | NP_795372 | Q | H | QH | benign            |
| rs1126436 | NP_066950 | E | K | EK | benign            |
| rs1126441 | NP_000659 | P | H | PH | probably damaging |
| rs1126441 | NP_000660 | P | H | PH | probably damaging |
| rs1126448 | NP_067544 | A | S | AS | benign            |
| rs1126448 | NP_000823 | A | S | AS | benign            |

|           |           |   |   |    |                   |
|-----------|-----------|---|---|----|-------------------|
| rs1126448 | NP_015566 | A | S | AS | benign            |
| rs1126451 | NP_803564 | V | A | VA | benign            |
| rs1126451 | NP_001045 | V | A | VA | benign            |
| rs1126454 | NP_001808 | D | H | DH | possibly damaging |
| rs1126455 | NP_001808 | V | E | VE | possibly damaging |
| rs1126456 | NP_001808 | F | L | FL | benign            |
| rs1126458 | NP_001807 | L | V | LV | benign            |
| rs1126461 | NP_000411 | D | E | DE | benign            |
| rs1126483 | NP_001968 | V | A | VA | benign            |
| rs1126497 | NP_002345 | T | M | TM | benign            |
| rs1126500 | NP_599150 | S | F | SF | benign            |
| rs1126513 | NP_002112 | G | V | GV | benign            |
| rs1126519 | NP_945320 | Q | R | QR | benign            |
| rs1126519 | NP_945321 | Q | R | QR | possibly damaging |
| rs1126519 | NP_001121 | Q | R | QR | possibly damaging |
| rs1126525 | NP_002094 | T | I | TI | benign            |
| rs1126534 | NP_291032 | A | V | AV | benign            |
| rs1126554 | NP_000410 | A | G | AG | possibly damaging |
| rs1126555 | NP_000410 | S | C | SC | probably damaging |
| rs1126558 | NP_004493 | W | S | WS | probably damaging |
| rs1126559 | NP_116027 | V | M | VM | possibly damaging |
| rs1126588 | NP_002741 | I | V | IV | benign            |
| rs1126588 | NP_620637 | I | V | IV | benign            |
| rs1126589 | NP_002741 | I | M | IM | benign            |
| rs1126589 | NP_620637 | I | M | IM | benign            |
| rs1126590 | NP_002741 | L | V | LV | benign            |
| rs1126590 | NP_620637 | L | V | LV | benign            |
| rs1126593 | NP_002741 | R | T | RT | benign            |
| rs1126593 | NP_620637 | R | T | RT | benign            |
| rs1126608 | NP_000893 | R | T | RT | benign            |
| rs1126608 | NP_009218 | R | T | RT | benign            |
| rs1126608 | NP_009219 | R | T | RT | benign            |
| rs1126608 | NP_009220 | R | T | RT | benign            |
| rs1126617 | NP_001494 | V | I | VI | benign            |
| rs1126617 | NP_803436 | V | I | VI | benign            |
| rs1126642 | NP_002046 | D | N | DN | possibly damaging |
| rs1126664 | NP_954698 | R | K | RK | benign            |
| rs1126664 | NP_000451 | R | K | RK | benign            |
| rs1126665 | NP_954698 | G | E | GE | benign            |
| rs1126665 | NP_000451 | G | E | GE | benign            |
| rs1126667 | NP_000688 | R | Q | RQ | benign            |
| rs1126671 | NP_000661 | I | V | IV | benign            |
| rs1126673 | NP_000661 | V | I | VI | benign            |
| rs1126690 | NP_000143 | I | V | IV | benign            |
| rs1126777 | NP_000599 | C | R | CR | benign            |
| rs1126777 | NP_000598 | R | C | RC | benign            |

|           |           |   |   |    |                   |
|-----------|-----------|---|---|----|-------------------|
| rs1126780 | NP_000598 | K | R | KR | benign            |
| rs1126780 | NP_000599 | R | K | RK | benign            |
| rs1126783 | NP_061949 | S | C | SC | benign            |
| rs1126785 | NP_061949 | D | H | DH | benign            |
| rs1126788 | NP_061949 | L | M | LM | benign            |
| rs1126792 | NP_061949 | F | L | FL | benign            |
| rs1126793 | NP_061949 | L | M | LM | benign            |
| rs1126799 | NP_000538 | V | A | VA | benign            |
| rs1126799 | NP_783650 | V | A | VA | benign            |
| rs1126799 | NP_783651 | V | A | VA | benign            |
| rs1126799 | NP_783652 | V | A | VA | benign            |
| rs1126799 | NP_783653 | V | A | VA | benign            |
| rs1126829 | NP_002941 | V | F | VF | possibly damaging |
| rs1126906 | NP_004432 | T | R | TR | benign            |
| rs1126922 | NP_997644 | P | H | PH | probably damaging |
| rs1126922 | NP_006615 | P | H | PH | probably damaging |
| rs1126930 | NP_997626 | T | S | TS | possibly damaging |
| rs1126932 | NP_006223 | G | A | GA | possibly damaging |
| rs1126933 | NP_001784 | Q | H | QH | benign            |
| rs1126962 | NP_001518 | I | R | IR | benign            |
| rs1126963 | NP_001518 | A | V | AV | benign            |
| rs1127069 | NP_001681 | S | C | SC | possibly damaging |
| rs1127176 | NP_060386 | H | P | HP | probably damaging |
| rs1127278 | NP_066284 | G | R | GR | benign            |
| rs1127281 | NP_006378 | C | S | CS | benign            |
| rs1127354 | NP_852470 | P | T | PT | probably damaging |
| rs1127354 | NP_258412 | P | T | PT | probably damaging |
| rs1127386 | NP_000818 | S | G | SG | possibly damaging |
| rs1127410 | NP_060203 | F | S | FS | benign            |
| rs1127412 | NP_004478 | D | G | DG | benign            |
| rs1127560 | NP_112576 | E | K | EK | benign            |
| rs1127564 | NP_060875 | G | S | GS | benign            |
| rs1127586 | XP_086937 | I | T | IT | benign            |
| rs1127588 | NP_963849 | K | M | KM | benign            |
| rs1127588 | NP_001441 | K | M | KM | benign            |
| rs1127618 | NP_006821 | W | L | WL | possibly damaging |
| rs1127675 | NP_116024 | S | T | ST | benign            |
| rs1127676 | NP_116024 | G | D | GD | benign            |
| rs1127691 | NP_003656 | D | V | DV | probably damaging |
| rs1127691 | NP_775628 | D | V | DV | probably damaging |
| rs1127717 | NP_036322 | D | A | DA | possibly damaging |
| rs1127732 | NP_037506 | S | L | SL | benign            |
| rs1127742 | NP_071739 | A | D | AD | possibly damaging |
| rs1127787 | NP_068593 | G | R | GR | possibly damaging |
| rs1127826 | NP_079456 | S | L | SL | benign            |
| rs1127846 | NP_003091 | V | F | VF | possibly damaging |

|           |           |   |   |    |                   |
|-----------|-----------|---|---|----|-------------------|
| rs1127888 | NP_079517 | A | T | AT | benign            |
| rs1127953 | NP_877393 | R | S | RS | benign            |
| rs1127953 | NP_877419 | R | S | RS | benign            |
| rs1127953 | NP_877420 | R | S | RS | benign            |
| rs1127953 | NP_003321 | R | S | RS | benign            |
| rs1127954 | NP_877393 | D | G | DG | probably damaging |
| rs1127954 | NP_877419 | D | G | DG | probably damaging |
| rs1127954 | NP_877420 | D | G | DG | probably damaging |
| rs1127954 | NP_003321 | D | G | DG | probably damaging |
| rs1128014 | NP_002902 | G | D | GD | benign            |
| rs1128039 | NP_061092 | V | L | VL | benign            |
| rs1128165 | NP_056480 | K | M | KM | benign            |
| rs1128293 | NP_056984 | S | I | SI | possibly damaging |
| rs1128316 | NP_005549 | A | P | AP | benign            |
| rs1128340 | NP_000716 | V | E | VE | probably damaging |
| rs1128349 | NP_115693 | G | R | GR | possibly damaging |
| rs1128374 | NP_060647 | R | C | RC | probably damaging |
| rs1128399 | NP_003767 | L | P | LP | benign            |
| rs1128428 | NP_001994 | S | R | SR | probably damaging |
| rs1128429 | NP_001994 | Y | C | YC | benign            |
| rs1128430 | NP_001994 | K | M | KM | probably damaging |
| rs1128431 | NP_078856 | I | V | IV | benign            |
| rs1128454 | NP_055130 | H | Q | HQ | probably damaging |
| rs1128501 | NP_000918 | G | V | GV | probably damaging |
| rs1128516 | NP_001290 | T | S | TS | possibly damaging |
| rs1128539 | NP_003106 | P | H | PH | probably damaging |
| rs1128562 | NP_005654 | P | S | PS | benign            |
| rs1128606 | NP_438169 | A | V | AV | benign            |
| rs1128607 | NP_438169 | L | F | LF | benign            |
| rs1128608 | NP_438169 | E | Q | EQ | benign            |
| rs1128613 | NP_438169 | L | S | LS | benign            |
| rs1128615 | NP_438169 | A | E | AE | benign            |
| rs1128625 | NP_000982 | R | G | RG | probably damaging |
| rs1128646 | NP_005865 | H | R | HR | benign            |
| rs1128670 | NP_054880 | R | Q | RQ | benign            |
| rs1128725 | NP_116167 | P | H | PH | probably damaging |
| rs1128864 | NP_001170 | S | L | SL | benign            |
| rs1128867 | NP_005267 | A | P | AP | possibly damaging |
| rs1128881 | NP_060517 | G | E | GE | possibly damaging |
| rs1128967 | XP_497943 | F | S | FS | benign            |
| rs1128992 | NP_003791 | P | Q | PQ | possibly damaging |
| rs1129037 | NP_085911 | I | T | IT | possibly damaging |
| rs1129055 | NP_787058 | A | T | AT | benign            |
| rs1129087 | NP_665859 | D | A | DA | possibly damaging |
| rs1129129 | NP_005547 | G | E | GE | possibly damaging |
| rs1129160 | NP_065705 | D | N | DN | benign            |

|           |           |   |   |    |                   |
|-----------|-----------|---|---|----|-------------------|
| rs1129167 | NP_937883 | D | E | DE | benign            |
| rs1129167 | NP_002947 | D | E | DE | benign            |
| rs1129182 | NP_037444 | E | K | EK | benign            |
| rs1129183 | NP_065080 | D | N | DN | benign            |
| rs1129250 | NP_000924 | F | L | FL | benign            |
| rs1129250 | NP_877949 | F | L | FL | benign            |
| rs1129273 | NP_002638 | F | S | FS | probably damaging |
| rs1129275 | NP_002638 | C | S | CS | probably damaging |
| rs1129279 | NP_002638 | L | V | LV | benign            |
| rs1129414 | NP_001663 | Q | P | QP | benign            |
| rs1129424 | NP_003833 | L | P | LP | benign            |
| rs1129424 | NP_671716 | L | P | LP | benign            |
| rs1129442 | NP_006143 | E | G | EG | possibly damaging |
| rs1129443 | NP_006143 | S | F | SF | possibly damaging |
| rs1129482 | NP_597816 | K | M | KM | possibly damaging |
| rs1129495 | NP_057228 | I | S | IS | possibly damaging |
| rs1129638 | XP_498188 | L | F | LF | probably damaging |
| rs1129639 | XP_498188 | L | F | LF | probably damaging |
| rs1129648 | NP_000797 | W | R | WR | probably damaging |
| rs1129656 | NP_005199 | I | F | IF | benign            |
| rs1129658 | NP_005199 | P | L | PL | probably damaging |
| rs1129659 | NP_690603 | K | Q | KQ | benign            |
| rs1129670 | XP_498188 | T | P | TP | possibly damaging |
| rs1129707 | NP_001703 | L | I | LI | benign            |
| rs1129744 | NP_064440 | F | L | FL | benign            |
| rs1129744 | NP_002113 | L | F | LF | benign            |
| rs1129749 | NP_064440 | H | Y | HY | benign            |
| rs1129749 | NP_002113 | Y | H | YH | benign            |
| rs1129763 | NP_005615 | T | M | TM | benign            |
| rs1129770 | NP_705838 | R | Q | RQ | benign            |
| rs1129825 | NP_005533 | A | T | AT | benign            |
| rs1129825 | NP_938150 | A | T | AT | benign            |
| rs1129825 | NP_938151 | A | T | AT | benign            |
| rs1129826 | NP_005533 | A | T | AT | benign            |
| rs1129826 | NP_938150 | A | T | AT | benign            |
| rs1129826 | NP_938151 | A | T | AT | benign            |
| rs1129827 | NP_938150 | V | G | VG | benign            |
| rs1129827 | NP_005533 | V | G | VG | probably damaging |
| rs1129844 | NP_002977 | A | T | AT | benign            |
| rs1129923 | NP_060293 | G | S | GS | possibly damaging |
| rs1129980 | NP_001439 | E | D | ED | benign            |
| rs1130042 | NP_005917 | Q | K | QK | benign            |
| rs1130043 | NP_005917 | G | E | GE | possibly damaging |
| rs1130095 | NP_000304 | P | L | PL | possibly damaging |
| rs1130097 | NP_000304 | P | L | PL | benign            |
| rs1130098 | NP_000304 | Y | H | YH | possibly damaging |

|           |           |   |   |    |                   |
|-----------|-----------|---|---|----|-------------------|
| rs1130100 | NP_003068 | N | D | ND | possibly damaging |
| rs1130101 | NP_003068 | N | S | NS | possibly damaging |
| rs1130102 | NP_003068 | H | Y | HY | probably damaging |
| rs1130104 | NP_003068 | R | W | RW | possibly damaging |
| rs1130107 | NP_000304 | D | Y | DY | probably damaging |
| rs1130111 | NP_003068 | I | T | IT | benign            |
| rs1130183 | NP_002232 | R | C | RC | possibly damaging |
| rs1130184 | NP_003160 | T | I | TI | benign            |
| rs1130248 | NP_150596 | T | P | TP | probably damaging |
| rs1130336 | NP_002474 | F | L | FL | probably damaging |
| rs1130426 | NP_001976 | T | M | TM | benign            |
| rs1130440 | NP_002696 | A | P | AP | benign            |
| rs1130466 | NP_037421 | I | N | IN | possibly damaging |
| rs1130480 | NP_036446 | K | M | KM | benign            |
| rs1130480 | NP_839942 | K | M | KM | benign            |
| rs1130481 | NP_036446 | N | D | ND | benign            |
| rs1130481 | NP_839942 | N | D | ND | benign            |
| rs1130482 | NP_036446 | H | R | HR | benign            |
| rs1130482 | NP_839942 | H | R | HR | benign            |
| rs1130486 | NP_036446 | G | S | GS | benign            |
| rs1130486 | NP_839942 | G | S | GS | benign            |
| rs1130487 | NP_036446 | P | R | PR | benign            |
| rs1130487 | NP_839942 | P | R | PR | benign            |
| rs1130490 | NP_002799 | E | V | EV | probably damaging |
| rs1130491 | NP_036446 | V | D | VD | benign            |
| rs1130491 | NP_839942 | V | D | VD | benign            |
| rs1130492 | NP_036446 | P | T | PT | benign            |
| rs1130492 | NP_839942 | P | T | PT | benign            |
| rs1130495 | NP_570857 | P | S | PS | benign            |
| rs1130495 | NP_570858 | P | S | PS | benign            |
| rs1130496 | NP_570857 | R | H | RH | benign            |
| rs1130496 | NP_570858 | R | H | RH | benign            |
| rs1130496 | NP_002838 | R | H | RH | benign            |
| rs1130499 | NP_570857 | N | S | NS | benign            |
| rs1130499 | NP_570858 | S | N | SN | benign            |
| rs1130503 | NP_036446 | T | M | TM | benign            |
| rs1130503 | NP_839942 | T | M | TM | benign            |
| rs1130504 | NP_036446 | P | H | PH | probably damaging |
| rs1130504 | NP_839942 | P | H | PH | probably damaging |
| rs1130505 | NP_036446 | T | S | TS | benign            |
| rs1130505 | NP_839942 | T | S | TS | benign            |
| rs1130537 | NP_001054 | T | P | TP | probably damaging |
| rs1130563 | NP_613258 | L | I | LI | benign            |
| rs1130563 | NP_004884 | L | I | LI | benign            |
| rs1130604 | NP_683758 | P | S | PS | benign            |
| rs1130604 | NP_690039 | P | S | PS | benign            |

|           |           |   |   |    |                   |
|-----------|-----------|---|---|----|-------------------|
| rs1130604 | NP_003090 | P | S | PS | benign            |
| rs1130643 | NP_004675 | T | A | TA | benign            |
| rs1130686 | NP_066271 | A | T | AT | benign            |
| rs1130686 | NP_072170 | A | T | AT | benign            |
| rs1130686 | NP_072171 | A | T | AT | benign            |
| rs1130688 | NP_000292 | R | K | RK | probably damaging |
| rs1130711 | NP_000474 | Q | K | QK | benign            |
| rs1130717 | NP_001625 | R | C | RC | benign            |
| rs1130718 | NP_001625 | K | E | KE | possibly damaging |
| rs1130774 | NP_620693 | A | D | AD | benign            |
| rs1130774 | NP_001884 | A | D | AD | benign            |
| rs1130793 | NP_002769 | C | S | CS | probably damaging |
| rs1130841 | NP_000772 | Y | C | YC | probably damaging |
| rs1130843 | NP_000772 | F | L | FL | probably damaging |
| rs1130856 | NP_004381 | H | Y | HY | benign            |
| rs1130856 | NP_683880 | H | Y | HY | benign            |
| rs1130866 | NP_942140 | T | I | TI | benign            |
| rs1130881 | NP_000908 | S | R | SR | benign            |
| rs1130885 | NP_000908 | K | E | KE | benign            |
| rs1130886 | NP_000908 | K | N | KN | benign            |
| rs1130887 | NP_000908 | T | S | TS | benign            |
| rs1130890 | NP_000908 | A | V | AV | benign            |
| rs1130891 | NP_000908 | Q | H | QH | benign            |
| rs1130892 | NP_000908 | V | I | VI | benign            |
| rs1130894 | NP_006800 | I | F | IF | benign            |
| rs1130896 | NP_006800 | S | F | SF | possibly damaging |
| rs1130904 | NP_055571 | S | A | SA | benign            |
| rs1130977 | NP_003665 | F | I | FI | probably damaging |
| rs1130982 | NP_006750 | I | M | IM | benign            |
| rs1131026 | NP_003063 | E | K | EK | benign            |
| rs1131040 | NP_002100 | D | N | DN | benign            |
| rs1131041 | NP_002100 | N | K | NK | benign            |
| rs1131042 | NP_002100 | N | H | NH | benign            |
| rs1131045 | NP_002100 | Q | H | QH | probably damaging |
| rs1131054 | NP_853628 | L | Q | LQ | possibly damaging |
| rs1131121 | NP_036216 | A | G | AG | benign            |
| rs1131132 | NP_003730 | M | I | MI | probably damaging |
| rs1131147 | NP_000365 | L | P | LP | benign            |
| rs1131156 | NP_005505 | S | W | SW | benign            |
| rs1131159 | NP_005505 | A | G | AG | benign            |
| rs1131167 | NP_003074 | L | V | LV | benign            |
| rs1131170 | NP_005505 | S | A | SA | benign            |
| rs1131199 | NP_005935 | C | S | CS | probably damaging |
| rs1131201 | NP_005505 | Q | R | QR | benign            |
| rs1131202 | NP_005505 | I | N | IN | benign            |
| rs1131204 | NP_005505 | A | T | AT | benign            |

|           |           |   |   |    |                   |
|-----------|-----------|---|---|----|-------------------|
| rs1131212 | NP_005505 | Q | H | QH | benign            |
| rs1131215 | NP_005505 | D | Y | DY | benign            |
| rs1131217 | NP_005505 | S | G | SG | benign            |
| rs1131223 | NP_005505 | N | T | NT | benign            |
| rs1131230 | NP_066299 | L | M | LM | benign            |
| rs1131230 | NP_524148 | L | M | LM | benign            |
| rs1131230 | NP_524147 | L | M | LM | benign            |
| rs1131293 | NP_055963 | F | C | FC | benign            |
| rs1131307 | NP_036461 | A | V | AV | benign            |
| rs1131356 | NP_001448 | N | D | ND | possibly damaging |
| rs1131387 | NP_004571 | E | Q | EQ | benign            |
| rs1131387 | NP_899057 | E | Q | EQ | benign            |
| rs1131387 | NP_899058 | E | Q | EQ | benign            |
| rs1131387 | NP_899059 | E | Q | EQ | benign            |
| rs1131388 | NP_004571 | E | A | EA | probably damaging |
| rs1131388 | NP_899057 | E | A | EA | probably damaging |
| rs1131388 | NP_899058 | E | A | EA | probably damaging |
| rs1131388 | NP_899059 | E | A | EA | probably damaging |
| rs1131503 | NP_003582 | N | S | NS | benign            |
| rs1131525 | NP_066299 | M | T | MT | probably damaging |
| rs1131525 | NP_524148 | M | T | MT | probably damaging |
| rs1131525 | NP_524147 | M | T | MT | probably damaging |
| rs1131559 | NP_001763 | N | K | NK | benign            |
| rs1131586 | NP_006371 | L | V | LV | benign            |
| rs1131587 | NP_006371 | P | R | PR | probably damaging |
| rs1131590 | NP_570824 | E | D | ED | benign            |
| rs1131593 | NP_570824 | I | V | IV | benign            |
| rs1131604 | NP_570824 | V | L | VL | benign            |
| rs1131619 | NP_115719 | A | D | AD | benign            |
| rs1131648 | NP_000710 | V | I | VI | benign            |
| rs1131649 | NP_000710 | N | S | NS | possibly damaging |
| rs1131653 | NP_000710 | V | I | VI | benign            |
| rs1131657 | NP_000710 | R | M | RM | benign            |
| rs1131658 | NP_000710 | D | E | DE | benign            |
| rs1131659 | NP_000710 | H | R | HR | probably damaging |
| rs1131716 | NP_699168 | P | L | PL | benign            |
| rs1131716 | NP_878274 | P | L | PL | probably damaging |
| rs1131769 | NP_938023 | H | R | HR | benign            |
| rs1131839 | NP_602296 | N | K | NK | benign            |
| rs1131839 | NP_602295 | N | K | NK | benign            |
| rs1131851 | NP_000199 | K | Q | KQ | benign            |
| rs1131857 | NP_000088 | N | H | NH | benign            |
| rs1131874 | NP_945328 | S | R | SR | benign            |
| rs1131874 | NP_945353 | S | R | SR | benign            |
| rs1131874 | NP_004697 | S | R | SR | benign            |
| rs1131877 | NP_003291 | M | T | MT | benign            |



|           |           |   |   |    |                   |
|-----------|-----------|---|---|----|-------------------|
| rs1131877 | NP_663777 | M | T | MT | benign            |
| rs1131877 | NP_663778 | M | T | MT | benign            |
| rs1131973 | NP_775740 | S | T | ST | benign            |
| rs1131992 | NP_006634 | V | M | VM | benign            |
| rs1132007 | NP_000059 | G | A | GA | benign            |
| rs1132078 | NP_892117 | A | V | AV | benign            |
| rs1132078 | NP_006405 | V | A | VA | benign            |
| rs1132111 | NP_005428 | P | R | PR | probably damaging |
| rs1132138 | NP_078963 | D | V | DV | possibly damaging |
| rs1132158 | NP_788274 | V | I | VI | benign            |
| rs1132161 | NP_003877 | T | I | TI | benign            |
| rs1132161 | NP_647450 | T | I | TI | benign            |
| rs1132175 | NP_061910 | H | D | HD | probably damaging |
| rs1132180 | NP_061910 | L | M | LM | benign            |
| rs1132181 | NP_061910 | E | K | EK | benign            |
| rs1132182 | NP_061910 | R | G | RG | benign            |
| rs1132200 | NP_060736 | A | T | AT | benign            |
| rs1132201 | NP_078965 | K | R | KR | benign            |
| rs1132210 | XP_372224 | V | F | VF | benign            |
| rs1132258 | NP_000412 | W | R | WR | probably damaging |
| rs1132259 | NP_000412 | H | R | HR | benign            |
| rs1132264 | NP_000412 | H | R | HR | probably damaging |
| rs1132265 | NP_000412 | D | H | DH | benign            |
| rs1132268 | NP_000412 | Q | E | QE | benign            |
| rs1132274 | NP_004578 | R | L | RL | possibly damaging |
| rs1132308 | NP_473363 | S | C | SC | benign            |
| rs1132308 | NP_004278 | S | C | SC | possibly damaging |
| rs1132337 | NP_005640 | F | Y | FY | benign            |
| rs1132528 | NP_073739 | L | Q | LQ | possibly damaging |
| rs1132543 | NP_003249 | M | V | MV | benign            |
| rs1132588 | NP_006855 | V | M | VM | benign            |
| rs1132591 | NP_067073 | F | V | FV | benign            |
| rs1132591 | NP_870994 | F | V | FV | benign            |
| rs1132591 | NP_871714 | F | V | FV | benign            |
| rs1132591 | NP_871715 | F | V | FV | benign            |
| rs1132593 | NP_067073 | F | S | FS | possibly damaging |
| rs1132593 | NP_870994 | F | S | FS | possibly damaging |
| rs1132593 | NP_871714 | F | S | FS | possibly damaging |
| rs1132593 | NP_871715 | F | S | FS | possibly damaging |
| rs1132595 | NP_006855 | N | S | NS | benign            |
| rs1132597 | NP_006855 | N | D | ND | benign            |
| rs1132599 | NP_006855 | M | I | MI | benign            |
| rs1132600 | NP_006855 | A | T | AT | benign            |
| rs1132604 | NP_006855 | H | Y | HY | benign            |
| rs1132604 | NP_036408 | Y | H | YH | benign            |
| rs1132605 | NP_006855 | F | L | FL | possibly damaging |

|           |           |   |   |    |                   |
|-----------|-----------|---|---|----|-------------------|
| rs1132606 | NP_006855 | F | Y | FY | benign            |
| rs1132608 | NP_006855 | M | V | MV | benign            |
| rs1132610 | NP_006855 | R | G | RG | possibly damaging |
| rs1132688 | NP_064576 | I | N | IN | probably damaging |
| rs1132822 | NP_077306 | S | F | SF | benign            |
| rs1132824 | NP_065806 | S | P | SP | possibly damaging |
| rs1132855 | NP_065184 | T | A | TA | benign            |
| rs1132889 | NP_060330 | P | A | PA | benign            |
| rs1132899 | NP_001637 | L | P | LP | benign            |
| rs1132949 | NP_775109 | N | D | ND | possibly damaging |
| rs1132949 | NP_000415 | N | D | ND | possibly damaging |
| rs1132950 | NP_775109 | N | S | NS | benign            |
| rs1132950 | NP_000415 | N | S | NS | benign            |
| rs1132951 | NP_775109 | L | F | LF | possibly damaging |
| rs1132954 | NP_775109 | I | S | IS | benign            |
| rs1132956 | NP_775109 | S | N | SN | benign            |
| rs1132973 | NP_005889 | A | D | AD | benign            |
| rs1132973 | NP_976240 | A | D | AD | benign            |
| rs1133005 | NP_002262 | L | I | LI | benign            |
| rs1133028 | NP_060788 | M | V | MV | benign            |
| rs1133090 | NP_071750 | H | D | HD | probably damaging |
| rs1133141 | NP_071904 | P | T | PT | possibly damaging |
| rs1133243 | NP_001544 | K | R | KR | benign            |
| rs1133248 | NP_003755 | L | H | LH | possibly damaging |
| rs1133297 | NP_006381 | A | P | AP | probably damaging |
| rs1133327 | NP_060825 | I | V | IV | benign            |
| rs1133369 | NP_898881 | K | R | KR | benign            |
| rs1133378 | NP_940936 | P | S | PS | possibly damaging |
| rs1133400 | NP_005530 | K | R | KR | benign            |
| rs1133417 | NP_940866 | E | D | ED | benign            |
| rs1133618 | XP_376903 | A | T | AT | benign            |
| rs1133639 | NP_742095 | V | G | VG | possibly damaging |
| rs1133639 | NP_742094 | V | G | VG | possibly damaging |
| rs1133639 | NP_742093 | V | G | VG | possibly damaging |
| rs1133639 | NP_473361 | V | G | VG | possibly damaging |
| rs1133763 | NP_005614 | K | Q | KQ | benign            |
| rs1133818 | NP_115509 | S | R | SR | possibly damaging |
| rs1133833 | NP_878904 | R | K | RK | benign            |
| rs1133833 | NP_065693 | R | K | RK | benign            |
| rs1133891 | NP_612476 | M | V | MV | benign            |
| rs1133893 | NP_057580 | T | A | TA | benign            |
| rs1133894 | NP_000146 | L | Q | LQ | probably damaging |
| rs1133950 | NP_115710 | K | Q | KQ | benign            |
| rs1133966 | NP_060553 | K | R | KR | benign            |
| rs1133973 | NP_006466 | V | D | VD | benign            |
| rs1134389 | NP_005806 | I | V | IV | benign            |

|           |           |   |   |    |                   |
|-----------|-----------|---|---|----|-------------------|
| rs1134391 | NP_005806 | R | S | RS | benign            |
| rs1134469 | NP_112205 | A | T | AT | benign            |
| rs1134534 | NP_068759 | R | Q | RQ | possibly damaging |
| rs1134555 | NP_659417 | M | I | MI | benign            |
| rs1134586 | NP_073611 | D | N | DN | benign            |
| rs1134647 | NP_064582 | E | G | EG | possibly damaging |
| rs1134758 | NP_004059 | V | L | VL | benign            |
| rs1134796 | NP_066955 | Y | F | YF | benign            |
| rs1134921 | NP_005246 | D | N | DN | benign            |
| rs1135005 | NP_005800 | Y | H | YH | possibly damaging |
| rs1135045 | NP_055859 | A | P | AP | benign            |
| rs1135053 | NP_006368 | L | F | LF | probably damaging |
| rs1135054 | NP_001842 | I | L | IL | benign            |
| rs1135054 | NP_511040 | I | L | IL | benign            |
| rs1135055 | NP_001842 | Q | H | QH | benign            |
| rs1135055 | NP_511040 | Q | H | QH | benign            |
| rs1135056 | NP_001842 | Q | R | QR | benign            |
| rs1135056 | NP_511040 | Q | R | QR | benign            |
| rs1135060 | NP_002467 | E | D | ED | benign            |
| rs1135062 | NP_005572 | T | A | TA | benign            |
| rs1135065 | NP_005572 | Q | H | QH | possibly damaging |
| rs1135093 | XP_371776 | M | V | MV | benign            |
| rs1135118 | NP_006155 | A | T | AT | benign            |
| rs1135343 | NP_005618 | D | E | DE | possibly damaging |
| rs1135367 | NP_005438 | F | L | FL | benign            |
| rs1135434 | NP_001627 | V | L | VL | benign            |
| rs1135515 | NP_008908 | H | L | HL | probably damaging |
| rs1135542 | NP_004424 | Q | K | QK | benign            |
| rs1135544 | NP_002904 | G | S | GS | possibly damaging |
| rs1135677 | NP_071760 | R | K | RK | benign            |
| rs1135711 | NP_066979 | Y | C | YC | benign            |
| rs1135728 | NP_963965 | W | C | WC | probably damaging |
| rs1135728 | NP_963964 | W | C | WC | probably damaging |
| rs1135728 | NP_998813 | W | C | WC | probably damaging |
| rs1135792 | NP_112536 | H | Y | HY | possibly damaging |
| rs1135793 | NP_112536 | N | Y | NY | benign            |
| rs1135794 | NP_112536 | N | T | NT | possibly damaging |
| rs1135795 | NP_112536 | R | H | RH | benign            |
| rs1135796 | NP_002775 | T | I | TI | benign            |
| rs1135802 | NP_057687 | E | K | EK | benign            |
| rs1135866 | NP_004941 | S | L | SL | possibly damaging |
| rs1135867 | NP_004941 | G | V | GV | possibly damaging |
| rs1135874 | NP_006871 | N | K | NK | benign            |
| rs1135874 | NP_002383 | N | K | NK | possibly damaging |
| rs1135874 | NP_006870 | N | K | NK | possibly damaging |
| rs1135874 | NP_006872 | N | K | NK | possibly damaging |

|           |           |   |   |    |                   |
|-----------|-----------|---|---|----|-------------------|
| rs1135880 | NP_002772 | W | C | WC | probably damaging |
| rs1135889 | XP_371079 | G | V | GV | possibly damaging |
| rs1135901 | NP_002772 | T | S | TS | possibly damaging |
| rs1135925 | NP_620706 | V | A | VA | benign            |
| rs1135925 | NP_003066 | V | A | VA | benign            |
| rs1135999 | NP_775745 | S | P | SP | probably damaging |
| rs1136001 | NP_775745 | H | N | HN | benign            |
| rs1136019 | NP_037366 | V | M | VM | benign            |
| rs1136024 | NP_112536 | T | P | TP | benign            |
| rs1136026 | NP_112536 | R | G | RG | benign            |
| rs1136027 | NP_112536 | I | L | IL | benign            |
| rs1136029 | NP_003316 | I | N | IN | possibly damaging |
| rs1136037 | NP_006175 | Q | K | QK | possibly damaging |
| rs1136039 | NP_006175 | Q | L | QL | probably damaging |
| rs1136040 | NP_006175 | Q | L | QL | probably damaging |
| rs1136074 | NP_002775 | L | Q | LQ | benign            |
| rs1136102 | NP_056449 | A | S | AS | benign            |
| rs1136103 | NP_000347 | P | R | PR | probably damaging |
| rs1136105 | NP_000347 | K | E | KE | benign            |
| rs1136124 | XP_498469 | I | T | IT | possibly damaging |
| rs1136139 | NP_008836 | H | Y | HY | benign            |
| rs1136198 | NP_002775 | M | V | MV | benign            |
| rs1136202 | NP_066296 | K | E | KE | benign            |
| rs1136203 | NP_060519 | S | R | SR | benign            |
| rs1136287 | NP_002606 | T | M | TM | possibly damaging |
| rs1136410 | NP_001609 | V | A | VA | benign            |
| rs1136545 | NP_002927 | L | F | LF | benign            |
| rs1136580 | NP_998839 | E | K | EK | benign            |
| rs1136612 | NP_002256 | Q | H | QH | benign            |
| rs1136691 | NP_002107 | G | R | GR | benign            |
| rs1136703 | NP_803564 | I | T | IT | benign            |
| rs1136703 | NP_001045 | I | T | IT | benign            |
| rs1136789 | NP_005735 | K | Q | KQ | benign            |
| rs1136881 | NP_072049 | R | S | RS | benign            |
| rs1137078 | NP_002107 | T | A | TA | benign            |
| rs1137086 | NP_620140 | K | E | KE | benign            |
| rs1137100 | NP_002294 | K | R | KR | benign            |
| rs1137101 | NP_002294 | Q | R | QR | benign            |
| rs1137515 | NP_056323 | L | F | LF | benign            |
| rs1137582 | NP_004026 | I | M | IM | benign            |
| rs1137582 | NP_009223 | I | M | IM | benign            |
| rs1137640 | NP_055105 | D | G | DG | possibly damaging |
| rs1137649 | NP_775924 | F | Y | FY | benign            |
| rs1137659 | NP_733759 | L | S | LS | possibly damaging |
| rs1137784 | NP_036387 | P | S | PS | benign            |
| rs1137806 | NP_940890 | P | L | PL | probably damaging |

|           |           |   |   |    |                   |
|-----------|-----------|---|---|----|-------------------|
| rs1138056 | NP_078831 | L | V | LV | benign            |
| rs1138056 | NP_036294 | L | V | LV | benign            |
| rs1138294 | NP_004663 | T | I | TI | benign            |
| rs1138335 | NP_068713 | E | K | EK | benign            |
| rs1138335 | NP_001690 | E | K | EK | benign            |
| rs1138336 | NP_068713 | D | G | DG | possibly damaging |
| rs1138336 | NP_001690 | D | G | DG | possibly damaging |
| rs1138357 | NP_004040 | C | Y | CY | benign            |
| rs1138358 | NP_004040 | N | K | NK | benign            |
| rs1138389 | NP_003601 | P | H | PH | probably damaging |
| rs1138409 | NP_000166 | A | S | AS | benign            |
| rs1138437 | NP_031359 | R | S | RS | possibly damaging |
| rs1138439 | NP_808211 | A | V | AV | benign            |
| rs1138439 | NP_803545 | A | V | AV | benign            |
| rs1138454 | NP_055559 | I | V | IV | benign            |
| rs1138569 | NP_001344 | T | A | TA | probably damaging |
| rs1138570 | NP_001344 | T | I | TI | probably damaging |
| rs1138575 | NP_001344 | R | H | RH | benign            |
| rs1138693 | NP_065109 | L | P | LP | benign            |
| rs1138697 | NP_000753 | E | D | ED | benign            |
| rs1138698 | NP_000753 | E | G | EG | benign            |
| rs1138736 | NP_006660 | G | R | GR | benign            |
| rs1138737 | NP_006660 | L | V | LV | benign            |
| rs1138800 | NP_056183 | Q | H | QH | probably damaging |
| rs1139017 | NP_005194 | P | L | PL | benign            |
| rs1139017 | NP_542988 | P | L | PL | benign            |
| rs1139017 | NP_542989 | P | L | PL | benign            |
| rs1139017 | NP_542991 | P | L | PL | benign            |
| rs1139017 | NP_542992 | P | L | PL | benign            |
| rs1139017 | NP_542993 | P | L | PL | benign            |
| rs1139017 | NP_542994 | P | L | PL | benign            |
| rs1139017 | NP_542995 | P | L | PL | benign            |
| rs1139017 | NP_542996 | P | L | PL | benign            |
| rs1139017 | NP_542998 | P | L | PL | benign            |
| rs1139017 | NP_542999 | P | L | PL | benign            |
| rs1139017 | NP_543000 | P | L | PL | benign            |
| rs1139017 | NP_543001 | P | L | PL | benign            |
| rs1139017 | NP_543002 | P | L | PL | benign            |
| rs1139017 | NP_543003 | P | L | PL | benign            |
| rs1139017 | NP_543004 | P | L | PL | benign            |
| rs1139017 | NP_542990 | P | L | PL | probably damaging |
| rs1139017 | NP_542997 | P | L | PL | probably damaging |
| rs1139017 | NP_543005 | P | L | PL | probably damaging |
| rs1139018 | NP_005194 | P | L | PL | benign            |
| rs1139018 | NP_542988 | P | L | PL | benign            |
| rs1139018 | NP_542989 | P | L | PL | benign            |

|           |           |   |   |    |                   |
|-----------|-----------|---|---|----|-------------------|
| rs1139018 | NP_542991 | P | L | PL | benign            |
| rs1139018 | NP_542992 | P | L | PL | benign            |
| rs1139018 | NP_542993 | P | L | PL | benign            |
| rs1139018 | NP_542994 | P | L | PL | benign            |
| rs1139018 | NP_542995 | P | L | PL | benign            |
| rs1139018 | NP_542996 | P | L | PL | benign            |
| rs1139018 | NP_542998 | P | L | PL | benign            |
| rs1139018 | NP_542999 | P | L | PL | benign            |
| rs1139018 | NP_543000 | P | L | PL | benign            |
| rs1139018 | NP_543001 | P | L | PL | benign            |
| rs1139018 | NP_543002 | P | L | PL | benign            |
| rs1139018 | NP_543003 | P | L | PL | benign            |
| rs1139018 | NP_543004 | P | L | PL | benign            |
| rs1139018 | NP_542990 | P | L | PL | probably damaging |
| rs1139018 | NP_542997 | P | L | PL | probably damaging |
| rs1139018 | NP_543005 | P | L | PL | probably damaging |
| rs1139025 | NP_542993 | P | L | PL | benign            |
| rs1139025 | NP_542998 | P | L | PL | benign            |
| rs1139025 | NP_005194 | P | L | PL | possibly damaging |
| rs1139025 | NP_542988 | P | L | PL | possibly damaging |
| rs1139025 | NP_542989 | P | L | PL | possibly damaging |
| rs1139025 | NP_542990 | P | L | PL | possibly damaging |
| rs1139025 | NP_542994 | P | L | PL | possibly damaging |
| rs1139025 | NP_542995 | P | L | PL | possibly damaging |
| rs1139025 | NP_542997 | P | L | PL | possibly damaging |
| rs1139025 | NP_543000 | P | L | PL | possibly damaging |
| rs1139025 | NP_543002 | P | L | PL | possibly damaging |
| rs1139025 | NP_543003 | P | L | PL | possibly damaging |
| rs1139025 | NP_543004 | P | L | PL | possibly damaging |
| rs1139025 | NP_542991 | P | L | PL | probably damaging |
| rs1139025 | NP_542996 | P | L | PL | probably damaging |
| rs1139030 | NP_005194 | E | Q | EQ | benign            |
| rs1139030 | NP_542988 | E | Q | EQ | benign            |
| rs1139030 | NP_542989 | E | Q | EQ | benign            |
| rs1139030 | NP_542990 | E | Q | EQ | benign            |
| rs1139030 | NP_542991 | E | Q | EQ | benign            |
| rs1139030 | NP_542993 | E | Q | EQ | benign            |
| rs1139030 | NP_542994 | E | Q | EQ | benign            |
| rs1139030 | NP_542995 | E | Q | EQ | benign            |
| rs1139030 | NP_542996 | E | Q | EQ | benign            |
| rs1139030 | NP_542997 | E | Q | EQ | benign            |
| rs1139030 | NP_542998 | E | Q | EQ | benign            |
| rs1139030 | NP_543000 | E | Q | EQ | benign            |
| rs1139030 | NP_543002 | E | Q | EQ | benign            |
| rs1139030 | NP_543003 | E | Q | EQ | benign            |
| rs1139030 | NP_543004 | E | Q | EQ | benign            |

|           |           |   |   |    |                   |
|-----------|-----------|---|---|----|-------------------|
| rs1139108 | NP_113679 | D | N | DN | benign            |
| rs1139210 | NP_079133 | F | L | FL | benign            |
| rs1139240 | NP_002043 | E | Q | EQ | benign            |
| rs1139241 | NP_002043 | V | L | VL | possibly damaging |
| rs1139244 | NP_002043 | A | P | AP | benign            |
| rs1139315 | NP_872415 | K | N | KN | benign            |
| rs1139447 | NP_000166 | G | V | GV | probably damaging |
| rs1139495 | NP_000187 | V | L | VL | benign            |
| rs1139545 | NP_055693 | N | K | NK | possibly damaging |
| rs1139731 | NP_060725 | H | P | HP | probably damaging |
| rs1139768 | NP_116228 | H | D | HD | probably damaging |
| rs1139774 | NP_002244 | R | G | RG | possibly damaging |
| rs1139775 | NP_002244 | K | N | KN | benign            |
| rs1139776 | NP_002244 | V | E | VE | possibly damaging |
| rs1139777 | NP_002244 | S | T | ST | benign            |
| rs1139793 | NP_665690 | I | K | IK | benign            |
| rs1139793 | NP_665691 | I | K | IK | benign            |
| rs1139793 | NP_006431 | I | K | IK | benign            |
| rs1139864 | NP_002483 | K | R | KR | benign            |
| rs1139953 | NP_036419 | S | C | SC | possibly damaging |
| rs1139954 | NP_036419 | S | I | SI | possibly damaging |
| rs1139978 | XP_378181 | T | P | TP | benign            |
| rs1139980 | NP_004770 | L | P | LP | benign            |
| rs1139998 | NP_443111 | L | P | LP | benign            |
| rs1139998 | NP_954658 | L | P | LP | benign            |
| rs1139998 | NP_954660 | L | P | LP | possibly damaging |
| rs1140009 | NP_787114 | M | V | MV | benign            |
| rs1140011 | NP_787114 | A | T | AT | benign            |
| rs1140038 | NP_110446 | D | Y | DY | probably damaging |
| rs1140053 | NP_976037 | S | R | SR | benign            |
| rs1140065 | NP_004444 | H | R | HR | benign            |
| rs1140159 | NP_064530 | M | I | MI | possibly damaging |
| rs1140219 | NP_006875 | D | E | DE | benign            |
| rs1140239 | NP_003577 | G | S | GS | benign            |
| rs1140285 | NP_003478 | E | V | EV | possibly damaging |
| rs1140285 | NP_631961 | E | V | EV | possibly damaging |
| rs1140385 | NP_003322 | P | R | PR | probably damaging |
| rs1140386 | NP_003322 | Q | H | QH | possibly damaging |
| rs1140409 | NP_004387 | S | A | SA | benign            |
| rs1140421 | NP_003913 | D | G | DG | possibly damaging |
| rs1140449 | NP_000468 | D | Y | DY | probably damaging |
| rs1140461 | NP_000908 | V | L | VL | benign            |
| rs1140462 | NP_000908 | H | Q | HQ | possibly damaging |
| rs1140470 | NP_001370 | A | G | AG | benign            |
| rs1140541 | NP_620710 | S | T | ST | benign            |
| rs1140541 | NP_003067 | S | T | ST | benign            |

|           |           |   |   |    |                   |
|-----------|-----------|---|---|----|-------------------|
| rs1140569 | NP_003290 | E | K | EK | benign            |
| rs1140570 | NP_003290 | E | K | EK | benign            |
| rs1140605 | NP_004782 | A | S | AS | benign            |
| rs1140606 | NP_004095 | S | F | SF | possibly damaging |
| rs1140612 | NP_004095 | H | D | HD | probably damaging |
| rs1140613 | NP_004095 | S | A | SA | benign            |
| rs1140614 | NP_004095 | A | V | AV | benign            |
| rs1140617 | NP_004095 | V | A | VA | benign            |
| rs1140618 | NP_004095 | E | Q | EQ | benign            |
| rs1140623 | NP_004095 | V | I | VI | benign            |
| rs1140679 | NP_055265 | D | V | DV | probably damaging |
| rs1140718 | NP_002602 | S | T | ST | possibly damaging |
| rs1140780 | NP_004450 | K | T | KT | benign            |
| rs1140780 | NP_872579 | K | T | KT | benign            |
| rs1140781 | NP_872579 | N | T | NT | benign            |
| rs1140781 | NP_004450 | N | T | NT | possibly damaging |
| rs1140871 | NP_064576 | E | D | ED | benign            |
| rs1140901 | NP_057182 | A | G | AG | possibly damaging |
| rs1140952 | NP_005921 | I | V | IV | benign            |
| rs1140952 | NP_976230 | I | V | IV | benign            |
| rs1140952 | NP_976231 | I | V | IV | benign            |
| rs1140952 | NP_976229 | I | V | IV | benign            |
| rs1140952 | NP_976232 | I | V | IV | benign            |
| rs1140968 | NP_148934 | K | N | KN | benign            |
| rs1140968 | NP_003880 | K | N | KN | benign            |
| rs1140968 | NP_071285 | K | N | KN | benign            |
| rs1140970 | NP_001060 | A | T | AT | benign            |
| rs1140993 | NP_036477 | R | S | RS | benign            |
| rs1141014 | NP_006599 | W | L | WL | possibly damaging |
| rs1141024 | NP_004860 | K | R | KR | possibly damaging |
| rs1141038 | NP_003969 | Q | H | QH | possibly damaging |
| rs1141039 | NP_003969 | E | K | EK | benign            |
| rs1141041 | NP_003969 | Q | H | QH | possibly damaging |
| rs1141042 | NP_003969 | R | L | RL | possibly damaging |
| rs1141043 | NP_003969 | A | S | AS | benign            |
| rs1141044 | NP_003969 | E | D | ED | benign            |
| rs1141045 | NP_003969 | Q | H | QH | possibly damaging |
| rs1141061 | NP_005328 | L | V | LV | benign            |
| rs1141138 | NP_003002 | Q | P | QP | possibly damaging |
| rs1141223 | NP_005098 | V | G | VG | probably damaging |
| rs1141245 | NP_005591 | L | R | LR | benign            |
| rs1141273 | NP_003679 | G | D | GD | benign            |
| rs1141282 | NP_066955 | S | F | SF | probably damaging |
| rs1141285 | NP_005246 | E | A | EA | benign            |
| rs1141356 | NP_853549 | Q | L | QL | probably damaging |
| rs1141356 | NP_877572 | Q | L | QL | probably damaging |



|           |           |   |   |    |                   |
|-----------|-----------|---|---|----|-------------------|
| rs1141356 | NP_898829 | Q | L | QL | probably damaging |
| rs1141356 | NP_877570 | Q | L | QL | probably damaging |
| rs1141357 | NP_853549 | V | A | VA | benign            |
| rs1141357 | NP_877572 | V | A | VA | benign            |
| rs1141357 | NP_877570 | V | A | VA | benign            |
| rs1141357 | NP_898829 | V | A | VA | possibly damaging |
| rs1141521 | NP_976028 | V | E | VE | benign            |
| rs1141521 | NP_005340 | V | E | VE | benign            |
| rs1141521 | NP_056958 | V | E | VE | benign            |
| rs1141521 | NP_976029 | V | E | VE | benign            |
| rs1141604 | NP_000347 | E | K | EK | benign            |
| rs1141715 | NP_002251 | S | F | SF | benign            |
| rs1141715 | NP_031359 | S | F | SF | benign            |
| rs1141718 | NP_000627 | I | T | IT | benign            |
| rs1141739 | NP_075010 | K | E | KE | benign            |
| rs1141739 | NP_075011 | K | E | KE | benign            |
| rs1141739 | NP_002029 | K | E | KE | benign            |
| rs1141754 | NP_002078 | Q | K | QK | benign            |
| rs1141832 | NP_005735 | D | N | DN | benign            |
| rs1142057 | NP_835223 | I | V | IV | benign            |
| rs1142185 | NP_001276 | E | V | EV | probably damaging |
| rs1142186 | NP_003970 | Q | R | QR | benign            |
| rs1142248 | NP_112536 | V | L | VL | benign            |
| rs1142249 | NP_008836 | S | L | SL | benign            |
| rs1142251 | NP_112536 | H | L | HL | benign            |
| rs1142256 | NP_112536 | V | I | VI | benign            |
| rs1142257 | NP_112536 | K | R | KR | benign            |
| rs1142258 | NP_112536 | S | P | SP | benign            |
| rs1142259 | NP_112536 | L | F | LF | benign            |
| rs1142260 | NP_112536 | P | A | PA | benign            |
| rs1142295 | NP_005956 | M | I | MI | benign            |
| rs1142295 | NP_444254 | M | I | MI | benign            |
| rs1142295 | NP_444255 | M | I | MI | benign            |
| rs1142295 | NP_444256 | M | I | MI | benign            |
| rs1142295 | NP_444257 | M | I | MI | benign            |
| rs1142295 | NP_444258 | M | I | MI | benign            |
| rs1142295 | NP_444253 | M | I | MI | benign            |
| rs1142530 | NP_077718 | L | P | LP | benign            |
| rs1142531 | XP_375664 | N | K | NK | benign            |
| rs1142532 | XP_375664 | W | R | WR | benign            |
| rs1142881 | XP_498425 | L | F | LF | benign            |
| rs1142882 | XP_498425 | M | V | MV | benign            |
| rs1142917 | NP_006587 | N | Y | NY | possibly damaging |
| rs1142917 | NP_955452 | N | Y | NY | probably damaging |
| rs1143093 | NP_001471 | W | C | WC | benign            |
| rs1143100 | NP_697043 | V | E | VE | benign            |

|           |           |   |   |    |                   |
|-----------|-----------|---|---|----|-------------------|
| rs1143205 | NP_570720 | T | A | TA | possibly damaging |
| rs1143243 | NP_000753 | S | R | SR | benign            |
| rs1143243 | NP_085079 | S | R | SR | benign            |
| rs1143243 | NP_000755 | S | R | SR | possibly damaging |
| rs1143264 | NP_066296 | K | M | KM | benign            |
| rs1143462 | NP_004740 | V | E | VE | benign            |
| rs1143462 | NP_954573 | V | E | VE | benign            |
| rs1143469 | NP_037403 | S | F | SF | benign            |
| rs1143507 | NP_036446 | H | R | HR | benign            |
| rs1143507 | NP_839942 | H | R | HR | benign            |
| rs1143508 | NP_036446 | P | H | PH | benign            |
| rs1143508 | NP_839942 | P | H | PH | benign            |
| rs1143607 | NP_057049 | L | M | LM | benign            |
| rs1143622 | NP_001001 | S | F | SF | benign            |
| rs1143650 | NP_000405 | T | S | TS | benign            |
| rs1143667 | NP_066568 | Y | C | YC | probably damaging |
| rs1143671 | NP_066568 | P | S | PS | benign            |
| rs1143672 | NP_066568 | R | K | RK | benign            |
| rs1143678 | NP_000623 | P | S | PS | possibly damaging |
| rs1143684 | NP_000895 | F | L | FL | probably damaging |
| rs1144122 | NP_116176 | E | K | EK | benign            |
| rs1144507 | NP_003446 | A | V | AV | benign            |
| rs1144566 | NP_002919 | R | H | RH | possibly damaging |
| rs1144790 | XP_374898 | K | N | KN | benign            |
| rs1145231 | NP_000525 | M | T | MT | benign            |
| rs1145232 | NP_000525 | G | R | GR | probably damaging |
| rs1145234 | NP_000525 | Y | H | YH | benign            |
| rs1145547 | XP_373053 | L | M | LM | benign            |
| rs1146858 | NP_079084 | S | F | SF | possibly damaging |
| rs1147238 | NP_079439 | V | A | VA | benign            |
| rs1147990 | NP_004614 | T | S | TS | benign            |
| rs1149056 | NP_003748 | Y | H | YH | possibly damaging |
| rs1149621 | NP_056331 | D | E | DE | benign            |
| rs1150181 | NP_001094 | R | G | RG | probably damaging |
| rs1150258 | NP_006841 | Y | H | YH | benign            |
| rs1150674 | XP_167152 | Y | C | YC | benign            |
| rs1150752 | NP_061978 | T | A | TA | benign            |
| rs1150767 | NP_976034 | L | F | LF | benign            |
| rs1150767 | NP_002692 | L | F | LF | benign            |
| rs1151489 | XP_374898 | Q | R | QR | benign            |
| rs1151569 | NP_057123 | D | H | DH | possibly damaging |
| rs1151625 | NP_060276 | P | L | PL | probably damaging |
| rs1151640 | XP_497748 | I | V | IV | benign            |
| rs1152186 | NP_002556 | V | M | VM | benign            |
| rs1152187 | NP_002556 | N | T | NT | benign            |
| rs1152188 | NP_002556 | P | L | PL | probably damaging |

|           |           |   |   |    |                   |
|-----------|-----------|---|---|----|-------------------|
| rs1152530 | NP_060638 | C | Y | CY | probably damaging |
| rs1152888 | NP_009130 | V | I | VI | benign            |
| rs1153411 | XP_496486 | G | D | GD | possibly damaging |
| rs1153850 | NP_076968 | R | P | RP | possibly damaging |
| rs1154232 | NP_000218 | N | K | NK | benign            |
| rs1154232 | NP_937762 | N | K | NK | benign            |
| rs1154233 | NP_000218 | S | G | SG | benign            |
| rs1154233 | NP_937762 | S | G | SG | benign            |
| rs1154510 | NP_002141 | A | T | AT | possibly damaging |
| rs1155514 | NP_113610 | Q | H | QH | benign            |
| rs1156281 | NP_001717 | K | N | KN | benign            |
| rs1156281 | NP_997072 | K | N | KN | benign            |
| rs1156287 | NP_848604 | G | R | GR | possibly damaging |
| rs1159148 | XP_166300 | Q | P | QP | benign            |
| rs1160185 | XP_293671 | V | I | VI | benign            |
| rs1162909 | XP_496692 | D | N | DN | benign            |
| rs1162975 | XP_056680 | S | T | ST | benign            |
| rs1164671 | XP_208058 | I | T | IT | benign            |
| rs1165196 | NP_005065 | I | T | IT | benign            |
| rs1165222 | XP_371254 | T | I | TI | benign            |
| rs1166719 | NP_689810 | N | D | ND | benign            |
| rs1168312 | NP_387467 | T | I | TI | benign            |
| rs1169288 | NP_000536 | I | L | IL | benign            |
| rs1169305 | NP_000536 | G | S | GS | benign            |
| rs1170672 | NP_741980 | D | G | DG | benign            |
| rs1170672 | NP_055222 | D | G | DG | possibly damaging |
| rs1170672 | NP_741979 | D | G | DG | possibly damaging |
| rs1170672 | NP_741981 | D | G | DG | possibly damaging |
| rs1174657 | NP_982279 | K | E | KE | benign            |
| rs1174658 | NP_982279 | F | S | FS | benign            |
| rs1175640 | NP_061174 | V | M | VM | benign            |
| rs1176744 | NP_006019 | Y | S | YS | benign            |
| rs1177573 | NP_002804 | R | W | RW | possibly damaging |
| rs1178027 | NP_002827 | P | L | PL | benign            |
| rs1178027 | NP_543031 | P | L | PL | benign            |
| rs1179916 | NP_115714 | K | M | KM | possibly damaging |
| rs1180116 | NP_055925 | I | V | IV | benign            |
| rs1180117 | NP_055925 | C | R | CR | benign            |
| rs1180318 | NP_055386 | F | L | FL | benign            |
| rs1180330 | XP_496359 | L | P | LP | benign            |
| rs1181883 | NP_689705 | T | M | TM | benign            |
| rs1183409 | NP_000723 | G | A | GA | benign            |
| rs1183768 | NP_055861 | R | G | RG | benign            |
| rs1184626 | NP_694541 | L | I | LI | benign            |
| rs1185193 | NP_055861 | E | D | ED | benign            |
| rs1185244 | NP_387467 | P | L | PL | benign            |

|           |           |   |   |    |                   |
|-----------|-----------|---|---|----|-------------------|
| rs1185246 | NP_653325 | I | T | IT | benign            |
| rs1185845 | NP_037452 | E | K | EK | benign            |
| rs1186902 | NP_002033 | H | R | HR | possibly damaging |
| rs1190736 | NP_473362 | V | L | VL | benign            |
| rs1190788 | NP_057461 | S | N | SN | benign            |
| rs1191778 | NP_065830 | E | G | EG | benign            |
| rs1192269 | XP_049952 | V | I | VI | benign            |
| rs1193851 | XP_374898 | S | C | SC | benign            |
| rs1194099 | XP_170658 | D | V | DV | benign            |
| rs1194100 | XP_170658 | V | L | VL | benign            |
| rs1197660 | NP_057726 | A | G | AG | benign            |
| rs1197665 | NP_057726 | T | N | TN | benign            |
| rs1197675 | NP_057726 | G | R | GR | possibly damaging |
| rs1197682 | NP_057726 | Y | H | YH | benign            |
| rs1197683 | NP_057726 | R | C | RC | benign            |
| rs1198849 | NP_653184 | N | D | ND | possibly damaging |
| rs1199457 | NP_036442 | W | L | WL | benign            |
| rs1200345 | NP_056355 | E | K | EK | benign            |
| rs1200875 | NP_443723 | R | C | RC | benign            |
| rs1201689 | XP_031706 | L | V | LV | benign            |
| rs1201791 | NP_689801 | A | T | AT | benign            |
| rs1202183 | NP_000918 | N | S | NS | benign            |
| rs1202418 | NP_003566 | M | V | MV | benign            |
| rs1204145 | NP_071385 | G | S | GS | benign            |
| rs1205193 | NP_808779 | G | V | GV | possibly damaging |
| rs1205434 | XP_028810 | K | N | KN | benign            |
| rs1206038 | NP_001401 | K | E | KE | benign            |
| rs1207505 | XP_210826 | R | K | RK | benign            |
| rs1207506 | XP_210826 | I | V | IV | benign            |
| rs1207578 | XP_093087 | M | T | MT | benign            |
| rs1207579 | XP_093087 | Q | E | QE | benign            |
| rs1207580 | XP_093087 | A | T | AT | benign            |
| rs1207582 | XP_093087 | S | N | SN | benign            |
| rs1208149 | XP_496933 | V | M | VM | benign            |
| rs1208150 | XP_496933 | P | Q | PQ | benign            |
| rs1208152 | XP_496933 | W | R | WR | possibly damaging |
| rs1208606 | NP_659448 | N | K | NK | benign            |
| rs1209412 | XP_496933 | G | E | GE | benign            |
| rs1209750 | NP_443723 | K | N | KN | benign            |
| rs1209879 | NP_054785 | A | T | AT | benign            |
| rs1210131 | NP_710141 | A | G | AG | benign            |
| rs1210795 | NP_057726 | R | H | RH | benign            |
| rs1211554 | NP_683762 | D | Y | DY | probably damaging |
| rs1211795 | XP_290923 | P | A | PA | possibly damaging |
| rs1212604 | NP_005600 | S | L | SL | probably damaging |
| rs1212829 | NP_055968 | L | F | LF | benign            |

|           |           |   |   |    |                   |
|-----------|-----------|---|---|----|-------------------|
| rs1212934 | NP_001401 | G | E | GE | possibly damaging |
| rs1212987 | NP_114128 | V | G | VG | benign            |
| rs1213011 | NP_056472 | E | K | EK | benign            |
| rs1213011 | NP_775099 | E | K | EK | benign            |
| rs1214836 | NP_542171 | E | K | EK | benign            |
| rs1216183 | NP_055176 | S | T | ST | benign            |
| rs1216183 | NP_780775 | S | T | ST | benign            |
| rs1217381 | XP_496384 | D | N | DN | benign            |
| rs1217401 | NP_006585 | S | L | SL | benign            |
| rs1218762 | NP_036500 | S | G | SG | benign            |
| rs1218763 | NP_036500 | W | C | WC | possibly damaging |
| rs1218825 | NP_690876 | L | F | LF | benign            |
| rs1225090 | XP_371586 | L | F | LF | benign            |
| rs1227049 | NP_071407 | G | A | GA | possibly damaging |
| rs1227051 | NP_071407 | A | T | AT | benign            |
| rs1227065 | NP_071407 | N | D | ND | benign            |
| rs1229984 | NP_000659 | H | R | HR | probably damaging |
| rs1230345 | NP_937882 | Q | H | QH | benign            |
| rs1230345 | NP_003871 | Q | H | QH | benign            |
| rs1230345 | NP_569080 | Q | H | QH | benign            |
| rs1233387 | NP_009091 | A | V | AV | benign            |
| rs1233428 | NP_861421 | T | K | TK | benign            |
| rs1237745 | NP_057604 | Q | H | QH | benign            |
| rs1240504 | NP_114127 | V | I | VI | benign            |
| rs1243117 | NP_478144 | A | S | AS | benign            |
| rs1243117 | NP_066009 | A | S | AS | benign            |
| rs1243469 | NP_115961 | Y | H | YH | possibly damaging |
| rs1243647 | XP_372508 | S | P | SP | benign            |
| rs1247696 | NP_068506 | I | V | IV | benign            |
| rs1248696 | NP_004738 | R | Q | RQ | benign            |
| rs1249958 | NP_006732 | G | E | GE | probably damaging |
| rs1250209 | NP_002017 | I | V | IV | benign            |
| rs1250209 | NP_997639 | I | V | IV | benign            |
| rs1250209 | NP_997640 | I | V | IV | benign            |
| rs1250209 | NP_997641 | I | V | IV | benign            |
| rs1250209 | NP_997643 | I | V | IV | benign            |
| rs1250209 | NP_997647 | I | V | IV | benign            |
| rs1250259 | NP_002017 | Q | L | QL | benign            |
| rs1250259 | NP_473375 | Q | L | QL | benign            |
| rs1250259 | NP_997639 | Q | L | QL | benign            |
| rs1250259 | NP_997640 | Q | L | QL | benign            |
| rs1250259 | NP_997641 | Q | L | QL | benign            |
| rs1250259 | NP_997643 | Q | L | QL | benign            |
| rs1250259 | NP_997647 | Q | L | QL | benign            |
| rs1254319 | NP_777638 | F | L | FL | benign            |
| rs1256120 | XP_495993 | L | P | LP | possibly damaging |

|           |           |   |   |    |                   |
|-----------|-----------|---|---|----|-------------------|
| rs1256149 | NP_004848 | I | T | IT | benign            |
| rs1260318 | NP_073619 | A | D | AD | possibly damaging |
| rs1260326 | NP_001477 | P | L | PL | probably damaging |
| rs1262686 | NP_065188 | R | Q | RQ | benign            |
| rs1263872 | NP_115961 | P | A | PA | probably damaging |
| rs1264457 | NP_005507 | G | R | GR | benign            |
| rs1264895 | NP_001679 | T | M | TM | benign            |
| rs1265053 | NP_054789 | A | P | AP | possibly damaging |
| rs1265054 | NP_054789 | E | K | EK | benign            |
| rs1265754 | NP_006772 | I | F | IF | benign            |
| rs1265891 | NP_110394 | Q | R | QR | benign            |
| rs1266494 | NP_006113 | S | F | SF | possibly damaging |
| rs1266787 | NP_060570 | M | T | MT | probably damaging |
| rs1269008 | NP_060823 | C | R | CR | probably damaging |
| rs1269215 | NP_116024 | Y | H | YH | possibly damaging |
| rs1269864 | NP_872293 | A | G | AG | benign            |
| rs1270764 | NP_777604 | Q | R | QR | benign            |
| rs1272484 | XP_371108 | F | L | FL | benign            |
| rs1273679 | NP_612503 | E | K | EK | benign            |
| rs1273680 | NP_612503 | R | G | RG | possibly damaging |
| rs1274523 | NP_065749 | D | Y | DY | possibly damaging |
| rs1274958 | NP_149016 | I | V | IV | benign            |
| rs1274971 | NP_665698 | E | K | EK | benign            |
| rs1274972 | NP_665698 | R | K | RK | benign            |
| rs1275329 | XP_497568 | M | K | MK | probably damaging |
| rs1275523 | NP_066918 | I | T | IT | possibly damaging |
| rs1275533 | NP_542159 | G | D | GD | benign            |
| rs1276286 | NP_071405 | E | V | EV | benign            |
| rs1276708 | NP_001072 | R | W | RW | probably damaging |
| rs1276712 | NP_001072 | Y | C | YC | probably damaging |
| rs1277017 | NP_775803 | P | L | PL | probably damaging |
| rs1277207 | NP_689976 | S | N | SN | benign            |
| rs1280395 | NP_116255 | T | P | TP | possibly damaging |
| rs1280396 | NP_116255 | T | A | TA | benign            |
| rs1281138 | NP_061859 | D | N | DN | benign            |
| rs1281145 | NP_061859 | P | L | PL | probably damaging |
| rs1281149 | NP_061859 | R | C | RC | benign            |
| rs1281378 | NP_056417 | M | T | MT | benign            |
| rs1284879 | NP_004649 | H | R | HR | benign            |
| rs1286812 | NP_005790 | Q | H | QH | benign            |
| rs1286812 | NP_795352 | Q | H | QH | benign            |
| rs1286812 | NP_795353 | Q | H | QH | benign            |
| rs1288095 | NP_003095 | V | A | VA | possibly damaging |
| rs1288389 | NP_714914 | V | A | VA | benign            |
| rs1288401 | NP_006662 | R | Q | RQ | benign            |
| rs1288598 | XP_497676 | E | A | EA | benign            |

|           |           |   |   |    |                   |
|-----------|-----------|---|---|----|-------------------|
| rs1288775 | NP_001473 | Q | H | QH | benign            |
| rs1289658 | NP_079464 | T | M | TM | benign            |
| rs1291212 | NP_852149 | R | S | RS | benign            |
| rs1291212 | NP_852150 | R | S | RS | benign            |
| rs1291212 | NP_115916 | R | S | RS | benign            |
| rs1292053 | NP_057345 | T | M | TM | benign            |
| rs1293839 | NP_001904 | R | K | RK | benign            |
| rs1293839 | NP_852477 | R | K | RK | benign            |
| rs1293985 | NP_005798 | I | T | IT | benign            |
| rs1298577 | NP_060151 | T | I | TI | possibly damaging |
| rs1299818 | XP_497676 | D | E | DE | benign            |
| rs1299956 | NP_660334 | R | I | RI | probably damaging |
| rs1309181 | XP_372891 | K | R | KR | benign            |
| rs1309184 | XP_372891 | D | G | DG | possibly damaging |
| rs1309185 | XP_372891 | Q | H | QH | benign            |
| rs1309353 | XP_375105 | V | I | VI | benign            |
| rs1313280 | XP_372331 | R | S | RS | benign            |
| rs1316300 | NP_066568 | P | S | PS | benign            |
| rs1316357 | XP_497745 | K | E | KE | benign            |
| rs1318056 | NP_005149 | T | S | TS | benign            |
| rs1318165 | NP_115627 | A | D | AD | benign            |
| rs1318196 | NP_055932 | S | G | SG | benign            |
| rs1318328 | NP_443069 | V | A | VA | benign            |
| rs1318328 | NP_005689 | V | A | VA | possibly damaging |
| rs1318335 | NP_006744 | A | G | AG | benign            |
| rs1318336 | NP_006744 | P | A | PA | possibly damaging |
| rs1318588 | NP_057186 | K | I | KI | possibly damaging |
| rs1318648 | NP_036423 | S | R | SR | benign            |
| rs1318979 | NP_113644 | T | A | TA | benign            |
| rs1319080 | NP_065840 | T | P | TP | possibly damaging |
| rs1319438 | NP_002459 | S | Y | SY | benign            |
| rs1319931 | XP_209719 | R | C | RC | benign            |
| rs1320303 | NP_699160 | V | L | VL | benign            |
| rs1320308 | NP_570128 | A | E | AE | possibly damaging |
| rs1320434 | NP_006744 | D | N | DN | benign            |
| rs1320571 | NP_694986 | S | N | SN | benign            |
| rs1320958 | XP_497654 | I | V | IV | benign            |
| rs1324366 | XP_378185 | E | A | EA | benign            |
| rs1325321 | XP_497373 | K | E | KE | benign            |
| rs1325927 | NP_006675 | F | I | FI | benign            |
| rs1326331 | NP_061926 | T | I | TI | benign            |
| rs1328361 | NP_004120 | N | H | NH | probably damaging |
| rs1329957 | XP_088491 | I | M | IM | benign            |
| rs1331845 | XP_497064 | R | H | RH | benign            |
| rs1334510 | XP_498152 | T | A | TA | benign            |
| rs1334811 | NP_000450 | V | I | VI | benign            |

|           |           |   |   |    |                   |
|-----------|-----------|---|---|----|-------------------|
| rs1336900 | NP_115508 | T | I | TI | possibly damaging |
| rs1338314 | NP_061946 | R | W | RW | benign            |
| rs1339374 | NP_777583 | V | I | VI | benign            |
| rs1339847 | NP_056246 | V | I | VI | benign            |
| rs1340989 | NP_004290 | A | V | AV | benign            |
| rs1341023 | NP_001716 | V | A | VA | benign            |
| rs1341044 | XP_071151 | V | G | VG | benign            |
| rs1342440 | NP_000553 | E | Q | EQ | benign            |
| rs1342642 | NP_055247 | L | F | LF | benign            |
| rs1344286 | NP_821077 | T | P | TP | possibly damaging |
| rs1344286 | NP_690874 | T | P | TP | possibly damaging |
| rs1344642 | NP_056505 | R | Q | RQ | benign            |
| rs1345092 | NP_056090 | T | S | TS | benign            |
| rs1345658 | NP_919306 | K | R | KR | possibly damaging |
| rs1345748 | XP_058997 | C | Y | CY | probably damaging |
| rs1345826 | NP_653248 | M | V | MV | probably damaging |
| rs1346044 | NP_000544 | C | R | CR | probably damaging |
| rs1347046 | NP_006789 | K | R | KR | benign            |
| rs1350010 | XP_496207 | S | I | SI | benign            |
| rs1350011 | XP_496207 | G | S | GS | benign            |
| rs1350902 | XP_166300 | L | V | LV | benign            |
| rs1351419 | NP_149113 | I | T | IT | benign            |
| rs1352714 | NP_060109 | N | S | NS | benign            |
| rs1353776 | NP_057285 | E | D | ED | benign            |
| rs1356461 | NP_036250 | L | M | LM | benign            |
| rs1359082 | NP_995324 | N | T | NT | benign            |
| rs1359300 | XP_378185 | S | L | SL | benign            |
| rs1359590 | NP_055722 | A | V | AV | benign            |
| rs1359836 | NP_055073 | P | L | PL | probably damaging |
| rs1361040 | NP_872628 | Q | H | QH | possibly damaging |
| rs1361040 | NP_079150 | Q | H | QH | possibly damaging |
| rs1361365 | NP_057629 | R | Q | RQ | benign            |
| rs1361754 | NP_689704 | I | T | IT | benign            |
| rs1363422 | NP_064552 | T | A | TA | benign            |
| rs1363752 | XP_058997 | E | G | EG | possibly damaging |
| rs1363753 | XP_058997 | G | R | GR | possibly damaging |
| rs1365776 | NP_004501 | R | G | RG | possibly damaging |
| rs1365776 | NP_536349 | R | G | RG | possibly damaging |
| rs1365776 | NP_004500 | R | G | RG | possibly damaging |
| rs1366245 | XP_091886 | M | I | MI | benign            |
| rs1366257 | XP_496320 | G | E | GE | possibly damaging |
| rs1366258 | XP_496320 | E | A | EA | probably damaging |
| rs1366842 | NP_919226 | T | K | TK | benign            |
| rs1367117 | NP_000375 | T | I | TI | benign            |
| rs1367580 | XP_048128 | V | L | VL | benign            |
| rs1368769 | NP_872312 | S | F | SF | benign            |



|           |           |   |   |    |                   |
|-----------|-----------|---|---|----|-------------------|
| rs1368883 | NP_788954 | V | A | VA | benign            |
| rs1370014 | NP_543148 | R | K | RK | benign            |
| rs1372085 | NP_006428 | T | I | TI | benign            |
| rs1372192 | NP_055006 | L | M | LM | benign            |
| rs1374576 | NP_653176 | S | N | SN | benign            |
| rs1376251 | NP_795371 | Y | C | YC | probably damaging |
| rs1377210 | NP_112569 | S | P | SP | probably damaging |
| rs1377436 | XP_046570 | Q | R | QR | benign            |
| rs1378795 | NP_078897 | S | C | SC | benign            |
| rs1378796 | NP_078897 | V | G | VG | possibly damaging |
| rs1380154 | NP_055093 | L | S | LS | benign            |
| rs1380657 | NP_115509 | A | T | AT | benign            |
| rs1380676 | XP_088331 | P | H | PH | possibly damaging |
| rs1380866 | NP_001935 | A | T | AT | benign            |
| rs1381057 | NP_006587 | Q | R | QR | benign            |
| rs1381057 | NP_955452 | Q | R | QR | benign            |
| rs1383180 | NP_714928 | R | Q | RQ | benign            |
| rs1383394 | NP_079507 | A | T | AT | benign            |
| rs1383726 | NP_000284 | L | V | LV | benign            |
| rs1385698 | NP_068555 | A | T | AT | benign            |
| rs1385699 | NP_068555 | R | K | RK | benign            |
| rs1386548 | NP_694943 | Q | H | QH | benign            |
| rs1387006 | NP_004148 | H | P | HP | benign            |
| rs1390938 | NP_003044 | I | T | IT | benign            |
| rs1390963 | NP_758954 | M | I | MI | benign            |
| rs1395027 | NP_006718 | S | F | SF | benign            |
| rs1395266 | NP_536723 | I | T | IT | benign            |
| rs1395267 | NP_536723 | P | S | PS | benign            |
| rs1395268 | NP_536723 | A | E | AE | benign            |
| rs1395388 | NP_003232 | E | Q | EQ | benign            |
| rs1397706 | NP_002340 | D | N | DN | benign            |
| rs1402467 | NP_006579 | D | E | DE | benign            |
| rs1402954 | NP_208385 | V | I | VI | benign            |
| rs1402954 | NP_036307 | V | I | VI | benign            |
| rs1403811 | XP_071099 | V | I | VI | benign            |
| rs1403812 | XP_071099 | M | V | MV | benign            |
| rs1405069 | NP_699201 | P | T | PT | benign            |
| rs1405570 | NP_955473 | V | I | VI | benign            |
| rs1407134 | NP_077272 | R | W | RW | possibly damaging |
| rs1407856 | NP_055876 | Q | E | QE | benign            |
| rs1407977 | NP_689787 | V | I | VI | benign            |
| rs1408184 | NP_079389 | R | G | RG | possibly damaging |
| rs1409136 | XP_084377 | I | V | IV | benign            |
| rs1409986 | NP_000948 | S | P | SP | benign            |
| rs1411272 | XP_071151 | T | M | TM | probably damaging |
| rs1411707 | XP_089747 | L | F | LF | benign            |

|           |           |   |   |    |                   |
|-----------|-----------|---|---|----|-------------------|
| rs1412360 | NP_387504 | T | A | TA | benign            |
| rs1413426 | NP_006527 | G | D | GD | possibly damaging |
| rs1416829 | NP_057629 | R | G | RG | benign            |
| rs1416840 | NP_659484 | I | T | IT | benign            |
| rs1417290 | NP_055876 | R | K | RK | benign            |
| rs1417816 | XP_496393 | M | I | MI | possibly damaging |
| rs1418387 | NP_002720 | A | V | AV | benign            |
| rs1418538 | NP_078964 | I | V | IV | benign            |
| rs1418843 | XP_291548 | L | F | LF | benign            |
| rs1420635 | NP_004954 | L | F | LF | benign            |
| rs1422645 | NP_005822 | P | A | PA | possibly damaging |
| rs1422795 | NP_150377 | S | G | SG | benign            |
| rs1425917 | NP_620144 | A | V | AV | benign            |
| rs1426310 | NP_001933 | V | M | VM | benign            |
| rs1426355 | XP_033113 | V | A | VA | benign            |
| rs1426654 | NP_995322 | T | A | TA | benign            |
| rs1427916 | NP_699185 | E | K | EK | benign            |
| rs1428180 | XP_496320 | F | S | FS | benign            |
| rs1429077 | NP_054872 | N | S | NS | benign            |
| rs1429148 | NP_060911 | E | K | EK | benign            |
| rs1432273 | NP_079029 | M | V | MV | benign            |
| rs1432862 | NP_001438 | R | C | RC | possibly damaging |
| rs1433083 | NP_075562 | A | T | AT | benign            |
| rs1436731 | NP_062565 | E | D | ED | benign            |
| rs1437880 | NP_061921 | R | G | RG | benign            |
| rs1437881 | NP_061921 | A | G | AG | benign            |
| rs1438157 | NP_003460 | A | V | AV | benign            |
| rs1438391 | NP_997290 | D | N | DN | benign            |
| rs1438694 | XP_371139 | M | L | ML | benign            |
| rs1438914 | XP_370866 | I | L | IL | benign            |
| rs1439922 | NP_003460 | A | V | AV | benign            |
| rs1442138 | NP_031377 | T | A | TA | benign            |
| rs1442139 | NP_031377 | V | I | VI | benign            |
| rs1442730 | NP_000042 | R | K | RK | benign            |
| rs1443417 | XP_375397 | Q | R | QR | benign            |
| rs1443549 | NP_004202 | G | A | GA | benign            |
| rs1445404 | NP_742056 | P | A | PA | benign            |
| rs1445404 | NP_742055 | P | A | PA | possibly damaging |
| rs1445845 | NP_055409 | E | K | EK | benign            |
| rs1445846 | NP_055409 | F | L | FL | benign            |
| rs1445898 | NP_653248 | R | Q | RQ | benign            |
| rs1450355 | NP_077312 | L | P | LP | benign            |
| rs1451568 | NP_114383 | K | N | KN | benign            |
| rs1451568 | NP_112567 | K | N | KN | benign            |
| rs1453324 | NP_877417 | S | P | SP | probably damaging |
| rs1453325 | NP_877417 | N | D | ND | benign            |

|           |           |   |   |    |                   |
|-----------|-----------|---|---|----|-------------------|
| rs1453326 | NP_877417 | A | D | AD | possibly damaging |
| rs1453541 | XP_166900 | M | T | MT | benign            |
| rs1453542 | XP_166900 | S | T | ST | benign            |
| rs1453543 | XP_166900 | D | G | DG | benign            |
| rs1453544 | XP_166900 | M | V | MV | benign            |
| rs1453547 | XP_166898 | P | L | PL | probably damaging |
| rs1454121 | NP_055928 | A | V | AV | benign            |
| rs1454248 | XP_496697 | H | R | HR | probably damaging |
| rs1454248 | XP_496698 | H | R | HR | probably damaging |
| rs1454249 | XP_496697 | S | P | SP | benign            |
| rs1454249 | XP_496698 | S | P | SP | benign            |
| rs1455555 | NP_002630 | I | V | IV | benign            |
| rs1456235 | NP_057726 | Q | R | QR | benign            |
| rs1456908 | XP_291204 | T | I | TI | benign            |
| rs1459248 | NP_078937 | P | L | PL | possibly damaging |
| rs1461777 | XP_208320 | K | E | KE | benign            |
| rs1462983 | XP_115092 | P | S | PS | probably damaging |
| rs1464060 | XP_291062 | S | P | SP | possibly damaging |
| rs1464826 | XP_496931 | H | Q | HQ | benign            |
| rs1464826 | NP_775949 | H | Q | HQ | benign            |
| rs1464827 | XP_496931 | H | R | HR | probably damaging |
| rs1464827 | NP_775949 | H | R | HR | probably damaging |
| rs1464828 | XP_496931 | P | S | PS | probably damaging |
| rs1464828 | NP_775949 | P | S | PS | probably damaging |
| rs1464890 | NP_057562 | T | A | TA | benign            |
| rs1465567 | NP_689616 | W | R | WR | probably damaging |
| rs1465789 | NP_003424 | P | L | PL | probably damaging |
| rs1465878 | NP_002245 | R | Q | RQ | benign            |
| rs1466684 | NP_076403 | T | M | TM | probably damaging |
| rs1466684 | NP_795713 | T | M | TM | probably damaging |
| rs1466685 | NP_037466 | R | Q | RQ | benign            |
| rs1466685 | NP_068806 | R | Q | RQ | benign            |
| rs1466731 | NP_056655 | G | R | GR | possibly damaging |
| rs1466731 | NP_056656 | G | R | GR | possibly damaging |
| rs1466731 | NP_001102 | G | R | GR | possibly damaging |
| rs1467379 | NP_006035 | V | A | VA | benign            |
| rs1467558 | NP_000601 | T | I | TI | benign            |
| rs1467877 | NP_005759 | E | Q | EQ | benign            |
| rs1468384 | NP_037521 | M | I | MI | possibly damaging |
| rs1468542 | NP_054735 | F | Y | FY | benign            |
| rs1468564 | NP_055043 | L | V | LV | benign            |
| rs1469087 | NP_003427 | D | G | DG | probably damaging |
| rs1469122 | NP_064573 | V | I | VI | benign            |
| rs1469778 | NP_066013 | S | C | SC | benign            |
| rs1470414 | NP_055963 | V | I | VI | benign            |
| rs1471997 | NP_861453 | R | Q | RQ | benign            |

|           |           |   |   |    |                   |
|-----------|-----------|---|---|----|-------------------|
| rs1473785 | NP_055433 | T | M | TM | benign            |
| rs1475853 | XP_496521 | P | S | PS | possibly damaging |
| rs1476387 | NP_003071 | S | R | SR | benign            |
| rs1476703 | NP_006707 | Y | N | YN | probably damaging |
| rs1476858 | XP_294534 | C | W | CW | probably damaging |
| rs1476859 | XP_294534 | A | T | AT | benign            |
| rs1478453 | XP_371755 | H | Q | HQ | benign            |
| rs1479500 | NP_689803 | S | T | ST | benign            |
| rs1482804 | NP_703145 | G | R | GR | benign            |
| rs1484418 | NP_851999 | M | I | MI | possibly damaging |
| rs1484858 | NP_872433 | P | L | PL | benign            |
| rs1484873 | NP_009094 | V | I | VI | benign            |
| rs1488689 | NP_115987 | I | T | IT | benign            |
| rs1488690 | NP_115987 | V | M | VM | benign            |
| rs1491242 | XP_373030 | Q | R | QR | benign            |
| rs1491431 | XP_374191 | R | G | RG | possibly damaging |
| rs1491432 | XP_374191 | V | A | VA | benign            |
| rs1491433 | XP_374191 | V | A | VA | benign            |
| rs1491434 | XP_374191 | A | G | AG | benign            |
| rs1493105 | NP_057597 | P | L | PL | probably damaging |
| rs1494555 | NP_002176 | V | I | VI | benign            |
| rs1494558 | NP_002176 | I | T | IT | possibly damaging |
| rs1494961 | NP_598375 | I | V | IV | benign            |
| rs1496121 | NP_150645 | R | G | RG | possibly damaging |
| rs1496121 | NP_150647 | R | G | RG | possibly damaging |
| rs1496121 | NP_000671 | R | G | RG | possibly damaging |
| rs1496856 | NP_004755 | R | K | RK | benign            |
| rs1498467 | XP_372354 | H | Q | HQ | benign            |
| rs1498468 | XP_372354 | L | F | LF | benign            |
| rs1498469 | XP_372354 | I | T | IT | benign            |
| rs1498486 | XP_372356 | A | S | AS | benign            |
| rs1499280 | NP_057030 | L | M | LM | benign            |
| rs1500088 | NP_009105 | H | P | HP | probably damaging |
| rs1500481 | XP_371603 | Y | H | YH | benign            |
| rs1503185 | NP_002834 | R | Q | RQ | benign            |
| rs1503193 | XP_372376 | R | G | RG | possibly damaging |
| rs1506418 | NP_536723 | T | A | TA | benign            |
| rs1506419 | NP_536723 | R | W | RW | probably damaging |
| rs1509123 | NP_694962 | L | F | LF | benign            |
| rs1510068 | NP_872303 | N | S | NS | benign            |
| rs1510068 | XP_496218 | S | N | SN | benign            |
| rs1510069 | NP_872303 | A | T | AT | benign            |
| rs1510069 | XP_496218 | T | A | TA | benign            |
| rs1510765 | NP_689739 | L | P | LP | benign            |
| rs1510765 | NP_995585 | L | P | LP | benign            |
| rs1515441 | NP_114161 | E | K | EK | benign            |

|           |           |   |   |    |                   |
|-----------|-----------|---|---|----|-------------------|
| rs1515442 | NP_114161 | M | V | MV | benign            |
| rs1517618 | NP_037404 | D | E | DE | benign            |
| rs1521484 | XP_372592 | E | Q | EQ | benign            |
| rs1521808 | NP_003733 | E | K | EK | benign            |
| rs1522044 | NP_073153 | P | S | PS | benign            |
| rs1523678 | XP_071093 | I | V | IV | benign            |
| rs1525626 | NP_849149 | R | P | RP | possibly damaging |
| rs1527263 | XP_374625 | G | E | GE | benign            |
| rs1527482 | NP_006370 | V | M | VM | benign            |
| rs1529739 | NP_003250 | E | Q | EQ | benign            |
| rs1529874 | NP_004817 | Y | H | YH | possibly damaging |
| rs1529927 | NP_000330 | G | A | GA | possibly damaging |
| rs1529979 | NP_055855 | K | Q | KQ | benign            |
| rs1530496 | NP_001360 | G | E | GE | possibly damaging |
| rs1530498 | NP_001360 | T | A | TA | benign            |
| rs1530824 | XP_045907 | D | Y | DY | possibly damaging |
| rs1532087 | XP_497330 | G | A | GA | benign            |
| rs1532268 | NP_076915 | L | S | LS | benign            |
| rs1532268 | NP_002445 | L | S | LS | benign            |
| rs1532918 | NP_009045 | D | H | DH | probably damaging |
| rs1534282 | NP_067653 | I | T | IT | possibly damaging |
| rs1534284 | NP_067653 | R | Q | RQ | benign            |
| rs1534561 | NP_660338 | Q | P | QP | benign            |
| rs1535422 | XP_048462 | T | A | TA | benign            |
| rs1535692 | NP_005699 | V | M | VM | benign            |
| rs1535882 | NP_006056 | R | G | RG | possibly damaging |
| rs1536207 | XP_495949 | V | F | VF | benign            |
| rs1536690 | NP_919301 | P | L | PL | probably damaging |
| rs1536929 | XP_294534 | L | S | LS | benign            |
| rs1537044 | NP_112178 | R | C | RC | possibly damaging |
| rs1537172 | XP_376554 | E | D | ED | benign            |
| rs1537232 | NP_001362 | T | M | TM | probably damaging |
| rs1537794 | NP_116263 | Q | K | QK | benign            |
| rs1538137 | NP_055784 | N | H | NH | benign            |
| rs1538660 | NP_003631 | P | L | PL | possibly damaging |
| rs1539172 | NP_775821 | K | R | KR | benign            |
| rs1539567 | NP_612370 | N | D | ND | benign            |
| rs1539587 | NP_006166 | A | V | AV | benign            |
| rs1539587 | NP_932326 | A | V | AV | benign            |
| rs1540615 | NP_079164 | I | T | IT | benign            |
| rs1541185 | NP_061935 | A | T | AT | benign            |
| rs1541797 | NP_689761 | R | Q | RQ | benign            |
| rs1542087 | NP_938015 | Q | P | QP | possibly damaging |
| rs1542752 | NP_839947 | S | P | SP | probably damaging |
| rs1543500 | NP_004897 | S | R | SR | possibly damaging |
| rs1543547 | NP_570970 | R | G | RG | probably damaging |

|           |           |   |   |    |                   |
|-----------|-----------|---|---|----|-------------------|
| rs1545040 | NP_036287 | E | D | ED | benign            |
| rs1545133 | NP_061887 | S | L | SL | benign            |
| rs1545620 | NP_004136 | S | A | SA | benign            |
| rs1546308 | XP_292093 | V | A | VA | benign            |
| rs1546548 | XP_496888 | M | I | MI | benign            |
| rs1546732 | NP_057178 | Q | H | QH | possibly damaging |
| rs1547742 | NP_065859 | S | L | SL | possibly damaging |
| rs1548349 | NP_079195 | E | Q | EQ | benign            |
| rs1548476 | NP_694963 | I | T | IT | benign            |
| rs1549206 | XP_498030 | V | I | VI | benign            |
| rs1549207 | XP_498030 | W | G | WG | probably damaging |
| rs1550116 | NP_077298 | Q | R | QR | benign            |
| rs1550931 | NP_653246 | Y | S | YS | probably damaging |
| rs1551118 | NP_775862 | T | A | TA | benign            |
| rs1551122 | NP_775862 | N | S | NS | benign            |
| rs1551886 | NP_000686 | R | H | RH | possibly damaging |
| rs1551888 | NP_000686 | N | S | NS | probably damaging |
| rs1552280 | NP_596870 | L | S | LS | possibly damaging |
| rs1552311 | NP_000329 | A | V | AV | benign            |
| rs1554005 | NP_060778 | T | M | TM | benign            |
| rs1555498 | NP_055247 | V | I | VI | benign            |
| rs1555696 | NP_570970 | L | R | LR | benign            |
| rs1555696 | NP_079493 | R | L | RL | benign            |
| rs1556189 | XP_294534 | V | G | VG | probably damaging |
| rs1556314 | NP_003298 | D | E | DE | benign            |
| rs1557294 | NP_955360 | T | A | TA | benign            |
| rs1558049 | NP_066968 | V | I | VI | benign            |
| rs1558876 | NP_055775 | T | S | TS | benign            |
| rs1558878 | NP_055775 | W | R | WR | possibly damaging |
| rs1559205 | NP_037367 | S | F | SF | benign            |
| rs1560058 | NP_071423 | S | N | SN | benign            |
| rs1560079 | NP_776161 | G | V | GV | probably damaging |
| rs1560099 | NP_060825 | Y | C | YC | benign            |
| rs1561736 | NP_060822 | T | I | TI | benign            |
| rs1563632 | NP_658988 | R | H | RH | benign            |
| rs1564374 | NP_891992 | R | Q | RQ | benign            |
| rs1564374 | NP_597840 | R | Q | RQ | benign            |
| rs1566286 | NP_060411 | A | T | AT | benign            |
| rs1566405 | XP_497333 | S | F | SF | possibly damaging |
| rs1566734 | NP_002834 | Q | P | QP | benign            |
| rs1567002 | NP_775801 | T | I | TI | possibly damaging |
| rs1567047 | NP_078858 | G | D | GD | possibly damaging |
| rs1567759 | NP_778253 | G | C | GC | benign            |
| rs1568852 | XP_496931 | A | T | AT | benign            |
| rs1568852 | NP_775949 | A | T | AT | benign            |
| rs1569767 | NP_065740 | V | I | VI | benign            |

|           |           |   |   |    |                   |
|-----------|-----------|---|---|----|-------------------|
| rs1570624 | NP_060570 | R | H | RH | possibly damaging |
| rs1570805 | NP_653181 | V | I | VI | benign            |
| rs1570806 | NP_653181 | H | P | HP | benign            |
| rs1572701 | NP_997301 | P | L | PL | possibly damaging |
| rs1572912 | NP_060671 | A | V | AV | benign            |
| rs1572983 | NP_001692 | R | Q | RQ | benign            |
| rs1573496 | NP_000664 | G | A | GA | probably damaging |
| rs1573509 | XP_166805 | L | V | LV | benign            |
| rs1573536 | NP_060327 | R | H | RH | benign            |
| rs1573537 | NP_036440 | G | E | GE | possibly damaging |
| rs1573649 | NP_872355 | M | T | MT | probably damaging |
| rs1574106 | XP_097580 | K | N | KN | benign            |
| rs1574566 | NP_000878 | F | L | FL | probably damaging |
| rs1577181 | NP_110378 | I | T | IT | possibly damaging |
| rs1592624 | NP_443132 | N | H | NH | benign            |
| rs1592624 | NP_937756 | N | H | NH | benign            |
| rs1592624 | NP_937757 | N | H | NH | benign            |
| rs1599882 | NP_005308 | G | R | GR | possibly damaging |
| rs1609860 | NP_060034 | H | P | HP | probably damaging |
| rs1610090 | XP_496282 | C | R | CR | benign            |
| rs1610161 | NP_060187 | Q | H | QH | benign            |
| rs1610557 | NP_689492 | C | W | CW | probably damaging |
| rs1610557 | NP_954577 | C | W | CW | probably damaging |
| rs1610558 | NP_689492 | K | N | KN | benign            |
| rs1610558 | NP_954577 | K | N | KN | probably damaging |
| rs1611762 | NP_005978 | H | Q | HQ | benign            |
| rs1611764 | NP_005978 | V | I | VI | benign            |
| rs1611770 | NP_002447 | V | M | VM | benign            |
| rs1611770 | NP_877418 | V | M | VM | benign            |
| rs1611775 | NP_114092 | P | R | PR | benign            |
| rs1613448 | NP_004239 | V | I | VI | benign            |
| rs1613461 | NP_999876 | R | C | RC | benign            |
| rs1613780 | XP_378185 | D | E | DE | benign            |
| rs1613931 | NP_149034 | R | Q | RQ | possibly damaging |
| rs1615556 | XP_498195 | P | S | PS | benign            |
| rs1617468 | NP_443128 | S | F | SF | benign            |
| rs1617510 | NP_055564 | P | A | PA | benign            |
| rs1617629 | NP_004940 | S | L | SL | benign            |
| rs1617629 | NP_077740 | S | L | SL | benign            |
| rs1618542 | NP_689799 | K | E | KE | benign            |
| rs1619502 | XP_376720 | A | S | AS | benign            |
| rs1619815 | NP_060658 | W | R | WR | possibly damaging |
| rs1619896 | NP_060658 | S | N | SN | benign            |
| rs1619925 | NP_060658 | R | Q | RQ | benign            |
| rs1620074 | NP_060199 | R | G | RG | possibly damaging |
| rs1620074 | NP_573441 | R | G | RG | possibly damaging |

|           |           |   |   |    |                   |
|-----------|-----------|---|---|----|-------------------|
| rs1620074 | NP_631943 | R | G | RG | possibly damaging |
| rs1620075 | NP_000553 | R | L | RL | probably damaging |
| rs1620402 | NP_116255 | L | V | LV | benign            |
| rs1620442 | XP_376720 | G | R | GR | benign            |
| rs1620560 | XP_378185 | R | C | RC | benign            |
| rs1621378 | NP_009187 | T | I | TI | possibly damaging |
| rs1622002 | NP_000845 | M | I | MI | benign            |
| rs1626153 | XP_292784 | T | S | TS | benign            |
| rs1626154 | NP_002555 | R | C | RC | possibly damaging |
| rs1626154 | NP_788085 | R | C | RC | possibly damaging |
| rs1626154 | NP_788086 | R | C | RC | possibly damaging |
| rs1627735 | XP_370992 | T | I | TI | benign            |
| rs1627915 | XP_370992 | G | E | GE | benign            |
| rs1628172 | XP_378185 | C | R | CR | benign            |
| rs1628310 | XP_378185 | A | T | AT | benign            |
| rs1628576 | NP_060199 | Q | E | QE | benign            |
| rs1628576 | NP_573441 | Q | E | QE | benign            |
| rs1628576 | NP_631943 | Q | E | QE | benign            |
| rs1629011 | XP_378185 | R | H | RH | benign            |
| rs1629203 | NP_057016 | L | W | LW | benign            |
| rs1629363 | XP_291645 | Q | R | QR | benign            |
| rs1629363 | XP_377644 | R | Q | RQ | benign            |
| rs1630312 | NP_060179 | H | Q | HQ | benign            |
| rs1632144 | NP_612365 | P | A | PA | possibly damaging |
| rs1632242 | NP_056346 | R | G | RG | possibly damaging |
| rs1632245 | NP_056346 | G | W | GW | possibly damaging |
| rs1634730 | XP_371809 | V | A | VA | benign            |
| rs1635141 | NP_002526 | G | A | GA | benign            |
| rs1635141 | NP_058197 | G | A | GA | benign            |
| rs1635242 | NP_056234 | S | G | SG | benign            |
| rs1635246 | NP_056234 | V | A | VA | benign            |
| rs1635498 | NP_003677 | C | R | CR | probably damaging |
| rs1635498 | NP_569082 | C | R | CR | probably damaging |
| rs1635712 | NP_872628 | G | D | GD | benign            |
| rs1635712 | NP_079150 | G | D | GD | benign            |
| rs1635798 | XP_376720 | V | G | VG | benign            |
| rs1635802 | XP_376720 | L | P | LP | possibly damaging |
| rs1636632 | NP_872625 | K | E | KE | benign            |
| rs1636632 | NP_872624 | Q | R | QR | benign            |
| rs1636632 | NP_085047 | Q | R | QR | benign            |
| rs1637696 | XP_371891 | G | V | GV | possibly damaging |
| rs1638089 | XP_496902 | F | S | FS | probably damaging |
| rs1638152 | NP_065943 | G | E | GE | benign            |
| rs1638559 | NP_996880 | L | V | LV | benign            |
| rs1638630 | XP_370541 | I | M | IM | benign            |
| rs1639122 | NP_001264 | D | E | DE | benign            |



|           |           |   |   |    |                   |
|-----------|-----------|---|---|----|-------------------|
| rs1642515 | NP_955367 | P | L | PL | probably damaging |
| rs1642515 | NP_001456 | P | L | PL | probably damaging |
| rs1643702 | NP_001741 | E | K | EK | benign            |
| rs1643702 | NP_775083 | E | K | EK | benign            |
| rs1643702 | NP_775084 | E | K | EK | benign            |
| rs1643702 | NP_775085 | E | K | EK | benign            |
| rs1644460 | NP_000073 | H | R | HR | probably damaging |
| rs1644698 | XP_058997 | P | A | PA | benign            |
| rs1644731 | NP_056540 | M | T | MT | benign            |
| rs1646008 | NP_075061 | V | L | VL | possibly damaging |
| rs1648162 | XP_497318 | S | F | SF | benign            |
| rs1648348 | NP_003636 | Q | K | QK | benign            |
| rs1648493 | NP_942130 | K | N | KN | probably damaging |
| rs1648493 | NP_002631 | K | N | KN | probably damaging |
| rs1650017 | NP_852094 | A | P | AP | possibly damaging |
| rs1651612 | XP_496151 | Q | R | QR | benign            |
| rs1652374 | NP_037458 | S | N | SN | benign            |
| rs1653624 | NP_002553 | N | I | NI | possibly damaging |
| rs1654280 | XP_371151 | R | K | RK | benign            |
| rs1654416 | NP_057447 | K | E | KE | benign            |
| rs1654551 | NP_004908 | S | A | SA | benign            |
| rs1654634 | NP_631915 | F | L | FL | benign            |
| rs1654635 | NP_631915 | M | T | MT | benign            |
| rs1654643 | NP_036446 | Y | C | YC | benign            |
| rs1654643 | NP_839942 | Y | C | YC | benign            |
| rs1655518 | NP_940949 | G | E | GE | possibly damaging |
| rs1655519 | NP_940949 | Y | D | YD | benign            |
| rs1656922 | NP_000884 | M | T | MT | benign            |
| rs1657509 | NP_689492 | V | I | VI | benign            |
| rs1657535 | NP_996553 | I | S | IS | benign            |
| rs1657535 | NP_996554 | I | S | IS | benign            |
| rs1657535 | NP_573398 | I | S | IS | benign            |
| rs1657535 | NP_570127 | I | S | IS | benign            |
| rs1657535 | NP_573399 | I | S | IS | benign            |
| rs1657738 | NP_066292 | S | L | SL | benign            |
| rs1657740 | NP_066292 | R | Q | RQ | benign            |
| rs1657742 | NP_066292 | Q | H | QH | possibly damaging |
| rs1657907 | NP_775800 | R | P | RP | possibly damaging |
| rs1659455 | XP_376720 | V | E | VE | possibly damaging |
| rs1661715 | NP_004515 | P | S | PS | benign            |
| rs1661960 | NP_079200 | A | E | AE | benign            |
| rs1663564 | NP_056090 | V | I | VI | benign            |
| rs1664022 | XP_378185 | R | L | RL | possibly damaging |
| rs1665335 | NP_997188 | G | R | GR | benign            |
| rs1667354 | XP_058997 | D | G | DG | benign            |
| rs1667363 | XP_058997 | S | C | SC | probably damaging |

|           |           |   |   |    |                   |
|-----------|-----------|---|---|----|-------------------|
| rs1667364 | XP_058997 | A | E | AE | probably damaging |
| rs1670195 | NP_478100 | S | C | SC | possibly damaging |
| rs1670195 | NP_036233 | S | C | SC | possibly damaging |
| rs1670283 | NP_004295 | I | V | IV | benign            |
| rs1671021 | NP_004515 | F | L | FL | benign            |
| rs1671036 | NP_004515 | H | R | HR | benign            |
| rs1671064 | NP_001095 | Q | R | QR | possibly damaging |
| rs1671161 | NP_060199 | P | L | PL | probably damaging |
| rs1671161 | NP_573441 | P | L | PL | probably damaging |
| rs1671161 | NP_631943 | P | L | PL | probably damaging |
| rs1671926 | NP_110381 | S | T | ST | possibly damaging |
| rs1671926 | NP_954630 | S | T | ST | possibly damaging |
| rs1672457 | NP_057726 | Q | H | QH | possibly damaging |
| rs1672867 | NP_115582 | D | N | DN | benign            |
| rs1673407 | NP_803875 | L | V | LV | benign            |
| rs1673408 | NP_803875 | R | S | RS | benign            |
| rs1673607 | NP_077817 | S | N | SN | benign            |
| rs1673786 | XP_496194 | S | T | ST | benign            |
| rs1675404 | NP_000704 | A | T | AT | probably damaging |
| rs1675953 | NP_060855 | E | K | EK | benign            |
| rs1676015 | XP_166300 | T | S | TS | benign            |
| rs1678160 | NP_003104 | M | V | MV | benign            |
| rs1678674 | NP_001362 | A | T | AT | benign            |
| rs1681072 | NP_115721 | E | D | ED | benign            |
| rs1681262 | NP_002876 | L | V | LV | benign            |
| rs1682061 | NP_060771 | P | R | PR | probably damaging |
| rs1685888 | XP_371053 | Q | H | QH | benign            |
| rs1685889 | XP_371053 | Q | E | QE | benign            |
| rs1687175 | NP_036234 | Q | P | QP | benign            |
| rs1687176 | NP_036234 | Q | H | QH | benign            |
| rs1687177 | NP_036234 | H | P | HP | probably damaging |
| rs1687219 | NP_005778 | T | P | TP | possibly damaging |
| rs1687252 | NP_004414 | E | Q | EQ | benign            |
| rs1689721 | NP_057442 | G | S | GS | benign            |
| rs1692060 | XP_372563 | D | N | DN | benign            |
| rs1692060 | XP_372565 | D | N | DN | benign            |
| rs1692061 | XP_372563 | C | R | CR | probably damaging |
| rs1692061 | XP_372565 | C | R | CR | probably damaging |
| rs1692062 | XP_372563 | K | E | KE | benign            |
| rs1692062 | XP_372565 | K | E | KE | benign            |
| rs1692864 | XP_372163 | L | P | LP | probably damaging |
| rs1692864 | XP_372097 | P | L | PL | probably damaging |
| rs1692896 | XP_497024 | N | Y | NY | benign            |
| rs1692896 | XP_497089 | N | Y | NY | benign            |
| rs1692898 | XP_497024 | H | D | HD | benign            |
| rs1692898 | XP_497089 | H | D | HD | benign            |

|           |           |   |   |    |                   |
|-----------|-----------|---|---|----|-------------------|
| rs1693362 | NP_060742 | H | P | HP | benign            |
| rs1693482 | NP_000660 | R | Q | RQ | benign            |
| rs1696351 | NP_006009 | M | I | MI | benign            |
| rs1696351 | NP_808219 | M | I | MI | benign            |
| rs1696551 | NP_004794 | W | G | WG | possibly damaging |
| rs1697144 | NP_005573 | V | I | VI | benign            |
| rs1697558 | XP_292784 | I | T | IT | benign            |
| rs1698597 | XP_378185 | R | W | RW | possibly damaging |
| rs1698605 | XP_378185 | A | S | AS | benign            |
| rs1698624 | XP_378185 | F | I | FI | benign            |
| rs1698647 | XP_378185 | A | T | AT | benign            |
| rs1698681 | XP_378185 | H | R | HR | possibly damaging |
| rs1699107 | NP_003096 | E | Q | EQ | benign            |
| rs1701407 | XP_371304 | E | D | ED | benign            |
| rs1701407 | XP_371302 | E | D | ED | benign            |
| rs1701408 | XP_371304 | G | D | GD | possibly damaging |
| rs1701408 | XP_371302 | G | D | GD | possibly damaging |
| rs1701772 | NP_775109 | A | T | AT | benign            |
| rs1701772 | NP_005546 | A | T | AT | benign            |
| rs1702003 | NP_671517 | G | D | GD | benign            |
| rs1702003 | NP_056362 | G | D | GD | benign            |
| rs1705343 | XP_496542 | N | Y | NY | possibly damaging |
| rs1705399 | XP_291141 | R | P | RP | possibly damaging |
| rs1705485 | XP_497714 | G | A | GA | benign            |
| rs1708467 | NP_115664 | S | N | SN | benign            |
| rs1708717 | XP_376139 | R | G | RG | possibly damaging |
| rs1708875 | NP_775102 | R | W | RW | possibly damaging |
| rs1709189 | NP_666018 | I | V | IV | benign            |
| rs1709540 | XP_499223 | G | S | GS | benign            |
| rs1709870 | NP_006391 | T | P | TP | benign            |
| rs1711444 | XP_497583 | M | L | ML | benign            |
| rs1713449 | NP_009041 | V | I | VI | benign            |
| rs1713456 | NP_009041 | C | Y | CY | probably damaging |
| rs1713457 | NP_009041 | S | T | ST | benign            |
| rs1713480 | NP_060810 | R | K | RK | benign            |
| rs1713884 | XP_496270 | D | Y | DY | probably damaging |
| rs1713890 | XP_496270 | R | H | RH | possibly damaging |
| rs1714864 | NP_066292 | P | L | PL | probably damaging |
| rs1714865 | NP_066292 | E | A | EA | benign            |
| rs1715297 | NP_004202 | S | L | SL | benign            |
| rs1715828 | NP_849143 | T | S | TS | benign            |
| rs1715919 | NP_060835 | Q | P | QP | benign            |
| rs1717065 | NP_954577 | M | I | MI | benign            |
| rs1717577 | NP_999876 | P | S | PS | possibly damaging |
| rs1717869 | XP_498204 | D | G | DG | possibly damaging |
| rs1717871 | XP_498204 | A | T | AT | benign            |

|           |           |   |   |    |                   |
|-----------|-----------|---|---|----|-------------------|
| rs1717922 | XP_291200 | M | I | MI | benign            |
| rs1718119 | NP_002553 | A | T | AT | benign            |
| rs1719152 | NP_002975 | S | T | ST | benign            |
| rs1721986 | XP_497281 | V | M | VM | benign            |
| rs1723718 | NP_079186 | H | R | HR | benign            |
| rs1723719 | NP_079186 | Q | R | QR | benign            |
| rs1724577 | NP_000250 | D | E | DE | benign            |
| rs1725578 | XP_498230 | R | P | RP | probably damaging |
| rs1726199 | NP_056234 | D | G | DG | benign            |
| rs1726208 | NP_056234 | V | L | VL | benign            |
| rs1726801 | NP_002682 | R | H | RH | benign            |
| rs1726803 | NP_002682 | S | N | SN | benign            |
| rs1726866 | NP_789787 | V | A | VA | benign            |
| rs1727960 | XP_093087 | L | W | LW | probably damaging |
| rs1730376 | NP_114128 | L | W | LW | benign            |
| rs1731017 | NP_065737 | Q | R | QR | benign            |
| rs1731153 | XP_496933 | S | L | SL | benign            |
| rs1731345 | XP_496929 | T | M | TM | possibly damaging |
| rs1732263 | NP_149022 | E | D | ED | benign            |
| rs1732301 | NP_149034 | S | N | SN | benign            |
| rs1732630 | NP_060918 | T | P | TP | possibly damaging |
| rs1733462 | NP_065830 | V | G | VG | possibly damaging |
| rs1734491 | NP_036371 | T | N | TN | benign            |
| rs1734492 | NP_036371 | R | G | RG | probably damaging |
| rs1735010 | NP_003544 | L | V | LV | benign            |
| rs1735011 | NP_003544 | P | L | PL | probably damaging |
| rs1735169 | NP_003407 | G | R | GR | benign            |
| rs1735170 | NP_003407 | L | F | LF | benign            |
| rs1736557 | NP_008825 | M | V | MV | benign            |
| rs1736772 | XP_496342 | G | R | GR | possibly damaging |
| rs1736924 | NP_061823 | S | P | SP | probably damaging |
| rs1737103 | XP_497653 | S | C | SC | benign            |
| rs1737105 | XP_496344 | D | G | DG | probably damaging |
| rs1737105 | XP_291395 | D | G | DG | probably damaging |
| rs1737108 | XP_496343 | C | S | CS | benign            |
| rs1737108 | XP_496345 | C | S | CS | benign            |
| rs1737145 | NP_940870 | A | V | AV | benign            |
| rs1737737 | NP_055386 | A | G | AG | benign            |
| rs1737738 | NP_055386 | A | P | AP | benign            |
| rs1737739 | NP_001711 | A | V | AV | benign            |
| rs1737739 | NP_861525 | A | V | AV | benign            |
| rs1737740 | NP_001711 | H | Y | HY | probably damaging |
| rs1737740 | NP_861525 | H | Y | HY | probably damaging |
| rs1737957 | NP_004167 | T | S | TS | benign            |
| rs1737959 | NP_004167 | S | N | SN | benign            |
| rs1738023 | NP_036199 | N | D | ND | possibly damaging |

|           |           |   |   |    |                   |
|-----------|-----------|---|---|----|-------------------|
| rs1738025 | NP_036199 | T | A | TA | benign            |
| rs1738248 | NP_001362 | R | W | RW | probably damaging |
| rs1738254 | NP_001362 | G | R | GR | benign            |
| rs1738364 | XP_496819 | N | H | NH | benign            |
| rs1740231 | NP_115609 | N | D | ND | benign            |
| rs1740231 | NP_954574 | N | D | ND | benign            |
| rs1741115 | NP_057123 | N | H | NH | possibly damaging |
| rs1741745 | NP_008925 | F | L | FL | benign            |
| rs1741745 | NP_008978 | L | F | LF | benign            |
| rs1741747 | NP_008978 | K | R | KR | benign            |
| rs1741747 | NP_932078 | R | K | RK | benign            |
| rs1744153 | XP_496813 | E | K | EK | benign            |
| rs1747336 | XP_293177 | Q | K | QK | benign            |
| rs1747930 | XP_378185 | S | T | ST | benign            |
| rs1747958 | XP_378185 | K | E | KE | benign            |
| rs1747960 | XP_378185 | L | F | LF | benign            |
| rs1748020 | NP_036519 | S | F | SF | possibly damaging |
| rs1748986 | NP_055564 | P | L | PL | benign            |
| rs1752427 | NP_072093 | V | A | VA | benign            |
| rs1753858 | NP_620133 | E | K | EK | benign            |
| rs1754169 | XP_496905 | L | M | LM | possibly damaging |
| rs1755403 | NP_055078 | S | T | ST | benign            |
| rs1755403 | NP_647474 | S | T | ST | benign            |
| rs1755403 | NP_647473 | S | T | ST | benign            |
| rs1755755 | NP_387504 | P | A | PA | possibly damaging |
| rs1756165 | XP_379639 | T | A | TA | benign            |
| rs1756165 | XP_499140 | T | A | TA | benign            |
| rs1757095 | NP_002151 | Q | R | QR | benign            |
| rs1758270 | NP_387504 | S | A | SA | benign            |
| rs1758271 | NP_387504 | Q | R | QR | possibly damaging |
| rs1758272 | NP_387504 | A | S | AS | benign            |
| rs1758286 | NP_387504 | R | T | RT | benign            |
| rs1758567 | NP_076918 | V | A | VA | benign            |
| rs1759072 | NP_109590 | K | I | KI | possibly damaging |
| rs1759073 | NP_109590 | P | A | PA | possibly damaging |
| rs1759074 | NP_109590 | S | R | SR | benign            |
| rs1759075 | NP_109590 | Q | P | QP | benign            |
| rs1760897 | NP_009041 | S | P | SP | possibly damaging |
| rs1760898 | NP_009041 | N | K | NK | benign            |
| rs1760903 | NP_009041 | R | C | RC | benign            |
| rs1760904 | NP_009041 | S | P | SP | possibly damaging |
| rs1762111 | NP_000341 | I | T | IT | benign            |
| rs1762971 | XP_497659 | V | L | VL | benign            |
| rs1763642 | NP_001234 | C | R | CR | probably damaging |
| rs1765761 | NP_001280 | D | H | DH | benign            |
| rs1766848 | NP_683762 | H | Q | HQ | possibly damaging |

|           |           |   |   |    |                   |
|-----------|-----------|---|---|----|-------------------|
| rs1769156 | XP_497707 | R | W | RW | possibly damaging |
| rs1769259 | NP_000498 | R | K | RK | benign            |
| rs1769774 | NP_075389 | P | S | PS | possibly damaging |
| rs1770043 | XP_377644 | K | R | KR | benign            |
| rs1770043 | XP_291645 | R | K | RK | benign            |
| rs1770380 | NP_076427 | D | Y | DY | benign            |
| rs1770744 | XP_496270 | Q | H | QH | possibly damaging |
| rs1772256 | NP_001494 | T | I | TI | benign            |
| rs1776148 | NP_003677 | G | E | GE | benign            |
| rs1776148 | NP_569082 | G | E | GE | benign            |
| rs1776342 | NP_058515 | A | T | AT | benign            |
| rs1778076 | NP_002042 | A | D | AD | benign            |
| rs1778158 | XP_378185 | L | P | LP | benign            |
| rs1778159 | XP_378185 | V | E | VE | benign            |
| rs1780742 | XP_497684 | C | G | CG | probably damaging |
| rs1780743 | XP_497684 | G | R | GR | possibly damaging |
| rs1781133 | XP_497648 | G | V | GV | probably damaging |
| rs1781872 | XP_496300 | K | T | KT | benign            |
| rs1781873 | XP_496300 | K | E | KE | benign            |
| rs1781935 | XP_495795 | R | G | RG | possibly damaging |
| rs1782218 | XP_060318 | V | I | VI | benign            |
| rs1782239 | XP_377659 | G | R | GR | benign            |
| rs1782240 | XP_377659 | V | D | VD | probably damaging |
| rs1782241 | XP_377659 | Y | C | YC | probably damaging |
| rs1782242 | XP_377659 | L | V | LV | benign            |
| rs1782338 | NP_060707 | T | I | TI | benign            |
| rs1782360 | NP_006717 | A | G | AG | benign            |
| rs1782674 | NP_005064 | D | N | DN | possibly damaging |
| rs1783147 | NP_803875 | H | Q | HQ | benign            |
| rs1783174 | NP_803875 | V | I | VI | benign            |
| rs1784245 | NP_005924 | Q | P | QP | possibly damaging |
| rs1784246 | NP_005924 | Q | P | QP | possibly damaging |
| rs1784381 | NP_005142 | S | P | SP | benign            |
| rs1784423 | NP_004762 | V | A | VA | benign            |
| rs1784424 | NP_004762 | T | N | TN | benign            |
| rs1785296 | XP_290818 | Q | P | QP | benign            |
| rs1785472 | NP_859016 | V | M | VM | benign            |
| rs1785506 | NP_060919 | R | Q | RQ | benign            |
| rs1785506 | NP_065918 | R | Q | RQ | benign            |
| rs1785506 | NP_680476 | R | Q | RQ | benign            |
| rs1785870 | XP_495898 | L | F | LF | benign            |
| rs1785928 | NP_060725 | V | M | VM | benign            |
| rs1785934 | NP_060725 | T | P | TP | benign            |
| rs1786484 | NP_005924 | K | Q | KQ | benign            |
| rs1788778 | XP_497583 | R | H | RH | benign            |
| rs1788799 | NP_000262 | I | M | IM | benign            |

|           |           |   |   |    |                   |
|-----------|-----------|---|---|----|-------------------|
| rs1789052 | NP_004940 | H | N | HN | benign            |
| rs1789052 | NP_077740 | H | N | HN | benign            |
| rs1789053 | NP_004940 | V | M | VM | benign            |
| rs1789053 | NP_077740 | V | M | VM | benign            |
| rs1789054 | NP_004940 | I | M | IM | benign            |
| rs1789054 | NP_077740 | I | M | IM | benign            |
| rs1790069 | NP_055601 | T | N | TN | benign            |
| rs1790746 | XP_208522 | A | D | AD | benign            |
| rs1791085 | NP_003794 | V | L | VL | benign            |
| rs1791634 | NP_149022 | E | Q | EQ | benign            |
| rs1792120 | NP_003096 | I | V | IV | benign            |
| rs1792754 | XP_495898 | R | P | RP | probably damaging |
| rs1792755 | XP_495898 | N | K | NK | possibly damaging |
| rs1793174 | NP_694938 | A | V | AV | benign            |
| rs1793493 | XP_370652 | Q | P | QP | possibly damaging |
| rs1794108 | NP_787128 | G | E | GE | probably damaging |
| rs1794108 | NP_002808 | G | E | GE | probably damaging |
| rs1794109 | NP_787128 | L | F | LF | benign            |
| rs1794109 | NP_002808 | L | F | LF | benign            |
| rs1795717 | XP_051091 | S | F | SF | possibly damaging |
| rs1795743 | NP_000100 | R | K | RK | benign            |
| rs1795743 | NP_003997 | R | K | RK | benign            |
| rs1795743 | NP_003998 | R | K | RK | benign            |
| rs1795743 | NP_004000 | R | K | RK | benign            |
| rs1795743 | NP_004002 | R | K | RK | benign            |
| rs1795743 | NP_004003 | R | K | RK | benign            |
| rs1795743 | NP_004005 | R | K | RK | benign            |
| rs1795743 | NP_004006 | R | K | RK | benign            |
| rs1795743 | NP_004008 | R | K | RK | benign            |
| rs1795743 | NP_004011 | R | K | RK | benign            |
| rs1795743 | NP_004001 | R | K | RK | benign            |
| rs1795743 | NP_004004 | R | K | RK | benign            |
| rs1796814 | NP_543144 | V | A | VA | benign            |
| rs1798192 | NP_006009 | P | T | PT | benign            |
| rs1799107 | XP_496888 | V | A | VA | benign            |
| rs1799112 | XP_496888 | R | G | RG | possibly damaging |
| rs1799125 | NP_872625 | S | R | SR | benign            |
| rs1799126 | NP_872624 | R | W | RW | possibly damaging |
| rs1799126 | NP_085047 | R | W | RW | possibly damaging |
| rs1799194 | XP_496902 | Y | S | YS | probably damaging |
| rs1799304 | XP_496888 | V | I | VI | benign            |
| rs1799335 | XP_496888 | V | I | VI | benign            |
| rs1799529 | XP_293352 | P | H | PH | probably damaging |
| rs1799725 | NP_000627 | V | A | VA | benign            |
| rs1799782 | NP_006288 | R | W | RW | probably damaging |
| rs1799791 | NP_000391 | I | M | IM | benign            |

|           |           |   |   |    |                   |
|-----------|-----------|---|---|----|-------------------|
| rs1799792 | NP_000391 | H | Y | HY | benign            |
| rs1799793 | NP_000391 | D | N | DN | benign            |
| rs1799802 | NP_005227 | P | S | PS | probably damaging |
| rs1799803 | NP_976227 | D | E | DE | benign            |
| rs1799803 | NP_005442 | D | E | DE | benign            |
| rs1799806 | NP_056646 | P | R | PR | probably damaging |
| rs1799807 | NP_000046 | D | G | DG | probably damaging |
| rs1799811 | NP_000843 | A | V | AV | benign            |
| rs1799814 | NP_000490 | T | N | TN | benign            |
| rs1799816 | NP_000199 | V | M | VM | possibly damaging |
| rs1799821 | NP_000089 | V | I | VI | benign            |
| rs1799822 | NP_000089 | M | V | MV | benign            |
| rs1799823 | NP_001600 | S | G | SG | possibly damaging |
| rs1799830 | NP_001054 | G | S | GS | possibly damaging |
| rs1799835 | NP_000231 | F | V | FV | probably damaging |
| rs1799841 | NP_001891 | C | R | CR | probably damaging |
| rs1799853 | NP_000762 | R | C | RC | probably damaging |
| rs1799863 | NP_000570 | L | Q | LQ | possibly damaging |
| rs1799864 | NP_000639 | V | I | VI | benign            |
| rs1799864 | NP_000638 | V | I | VI | benign            |
| rs1799891 | NP_005214 | P | A | PA | benign            |
| rs1799895 | NP_003093 | R | G | RG | possibly damaging |
| rs1799896 | NP_000508 | V | F | VF | probably damaging |
| rs1799896 | NP_000549 | V | F | VF | probably damaging |
| rs1799899 | NP_001054 | G | S | GS | benign            |
| rs1799904 | NP_000430 | R | Q | RQ | benign            |
| rs1799930 | NP_000006 | R | Q | RQ | possibly damaging |
| rs1799931 | NP_000006 | G | E | GE | benign            |
| rs1799938 | NP_000718 | G | S | GS | benign            |
| rs1799939 | NP_065681 | G | S | GS | benign            |
| rs1799939 | NP_066124 | G | S | GS | benign            |
| rs1799944 | NP_000050 | N | D | ND | benign            |
| rs1799945 | NP_620572 | H | D | HD | benign            |
| rs1799945 | NP_620573 | H | D | HD | possibly damaging |
| rs1799945 | NP_620571 | H | D | HD | probably damaging |
| rs1799945 | NP_620574 | H | D | HD | probably damaging |
| rs1799945 | NP_620575 | H | D | HD | probably damaging |
| rs1799945 | NP_620578 | H | D | HD | probably damaging |
| rs1799945 | NP_000401 | H | D | HD | probably damaging |
| rs1799950 | NP_009230 | Q | R | QR | possibly damaging |
| rs1799950 | NP_009231 | Q | R | QR | possibly damaging |
| rs1799950 | NP_009232 | Q | R | QR | possibly damaging |
| rs1799950 | NP_009233 | Q | R | QR | possibly damaging |
| rs1799950 | NP_009228 | Q | R | QR | possibly damaging |
| rs1799951 | NP_000050 | N | S | NS | benign            |
| rs1799954 | NP_000050 | R | C | RC | possibly damaging |



|           |           |   |   |    |                   |
|-----------|-----------|---|---|----|-------------------|
| rs1799959 | NP_000318 | A | G | AG | benign            |
| rs1799960 | NP_000574 | V | A | VA | benign            |
| rs1799966 | NP_009235 | G | S | GS | benign            |
| rs1799966 | NP_009229 | S | G | SG | benign            |
| rs1799966 | NP_009233 | S | G | SG | benign            |
| rs1799966 | NP_009234 | S | G | SG | benign            |
| rs1799966 | NP_009236 | S | G | SG | benign            |
| rs1799966 | NP_009228 | S | G | SG | benign            |
| rs1799967 | NP_009229 | M | I | MI | benign            |
| rs1799967 | NP_009233 | M | I | MI | benign            |
| rs1799967 | NP_009234 | M | I | MI | benign            |
| rs1799967 | NP_009236 | M | I | MI | benign            |
| rs1799967 | NP_009228 | M | I | MI | benign            |
| rs1799967 | NP_009235 | M | I | MI | benign            |
| rs1799969 | NP_000192 | G | R | GR | probably damaging |
| rs1799971 | NP_000905 | N | D | ND | possibly damaging |
| rs1799972 | NP_000905 | A | V | AV | benign            |
| rs1799974 | NP_000905 | R | H | RH | possibly damaging |
| rs1799977 | NP_000240 | I | V | IV | benign            |
| rs1799979 | NP_000327 | T | M | TM | benign            |
| rs1799983 | NP_000594 | D | E | DE | benign            |
| rs1799990 | NP_898902 | M | V | MV | probably damaging |
| rs1799999 | NP_002702 | D | Y | DY | probably damaging |
| rs1800002 | NP_000321 | D | N | DN | benign            |
| rs1800010 | NP_004174 | E | V | EV | possibly damaging |
| rs1800011 | NP_000228 | A | T | AT | possibly damaging |
| rs1800014 | NP_898902 | E | K | EK | benign            |
| rs1800025 | NP_000502 | D | N | DN | benign            |
| rs1800033 | NP_954987 | V | M | VM | benign            |
| rs1800033 | NP_000351 | V | M | VM | benign            |
| rs1800033 | NP_954986 | V | M | VM | benign            |
| rs1800034 | NP_000672 | A | G | AG | benign            |
| rs1800035 | NP_000672 | N | K | NK | possibly damaging |
| rs1800053 | NP_000035 | A | D | AD | benign            |
| rs1800054 | NP_000042 | S | C | SC | possibly damaging |
| rs1800056 | NP_000042 | F | L | FL | possibly damaging |
| rs1800057 | NP_000042 | P | R | PR | probably damaging |
| rs1800058 | NP_612149 | L | F | LF | benign            |
| rs1800058 | NP_000042 | L | F | LF | benign            |
| rs1800058 | NP_612150 | L | F | LF | benign            |
| rs1800059 | NP_612149 | S | R | SR | benign            |
| rs1800059 | NP_000042 | S | R | SR | benign            |
| rs1800060 | NP_612149 | V | I | VI | benign            |
| rs1800060 | NP_000042 | V | I | VI | benign            |
| rs1800061 | NP_612149 | G | A | GA | benign            |
| rs1800061 | NP_000042 | G | A | GA | possibly damaging |

|           |           |   |   |    |                   |
|-----------|-----------|---|---|----|-------------------|
| rs1800067 | NP_005227 | R | Q | RQ | possibly damaging |
| rs1800068 | NP_005227 | R | T | RT | possibly damaging |
| rs1800069 | NP_005227 | I | T | IT | possibly damaging |
| rs1800072 | NP_000483 | V | I | VI | benign            |
| rs1800073 | NP_000483 | R | C | RC | probably damaging |
| rs1800074 | NP_000483 | D | V | DV | probably damaging |
| rs1800076 | NP_000483 | R | Q | RQ | possibly damaging |
| rs1800078 | NP_000483 | L | P | LP | probably damaging |
| rs1800079 | NP_000483 | R | H | RH | possibly damaging |
| rs1800080 | NP_000483 | S | G | SG | possibly damaging |
| rs1800085 | NP_000483 | V | M | VM | benign            |
| rs1800086 | NP_000483 | T | S | TS | possibly damaging |
| rs1800087 | NP_000483 | Q | H | QH | probably damaging |
| rs1800089 | NP_000483 | L | F | LF | benign            |
| rs1800092 | NP_000483 | I | M | IM | benign            |
| rs1800093 | NP_000483 | F | C | FC | probably damaging |
| rs1800097 | NP_000483 | V | I | VI | benign            |
| rs1800098 | NP_000483 | G | A | GA | benign            |
| rs1800099 | NP_000483 | S | G | SG | benign            |
| rs1800100 | NP_000483 | R | C | RC | probably damaging |
| rs1800101 | NP_000483 | F | L | FL | benign            |
| rs1800103 | NP_000483 | I | M | IM | possibly damaging |
| rs1800106 | NP_000483 | Y | H | YH | possibly damaging |
| rs1800107 | NP_000483 | S | I | SI | possibly damaging |
| rs1800110 | NP_000483 | L | S | LS | possibly damaging |
| rs1800111 | NP_000483 | L | F | LF | possibly damaging |
| rs1800112 | NP_000483 | I | T | IT | possibly damaging |
| rs1800114 | NP_000483 | A | V | AV | possibly damaging |
| rs1800120 | NP_000483 | R | L | RL | probably damaging |
| rs1800123 | NP_000483 | T | I | TI | benign            |
| rs1800124 | NP_005227 | E | G | EG | possibly damaging |
| rs1800127 | NP_002323 | A | V | AV | benign            |
| rs1800149 | NP_000240 | L | V | LV | benign            |
| rs1800152 | NP_000242 | H | Q | HQ | probably damaging |
| rs1800172 | NP_861462 | G | S | GS | benign            |
| rs1800172 | NP_861463 | G | S | GS | benign            |
| rs1800172 | NP_000209 | G | S | GS | benign            |
| rs1800197 | NP_006252 | A | T | AT | benign            |
| rs1800203 | NP_000406 | S | G | SG | possibly damaging |
| rs1800205 | NP_000301 | I | T | IT | benign            |
| rs1800209 | NP_006484 | K | R | KR | benign            |
| rs1800240 | NP_000080 | R | H | RH | possibly damaging |
| rs1800250 | NP_000080 | T | P | TP | possibly damaging |
| rs1800256 | NP_000100 | Q | P | QP | possibly damaging |
| rs1800256 | NP_003997 | Q | P | QP | possibly damaging |
| rs1800256 | NP_003998 | Q | P | QP | possibly damaging |

|           |           |   |   |    |                   |
|-----------|-----------|---|---|----|-------------------|
| rs1800256 | NP_004000 | Q | P | QP | possibly damaging |
| rs1800256 | NP_004001 | Q | P | QP | possibly damaging |
| rs1800257 | NP_000100 | I | T | IT | possibly damaging |
| rs1800257 | NP_003997 | I | T | IT | possibly damaging |
| rs1800257 | NP_003998 | I | T | IT | possibly damaging |
| rs1800257 | NP_004000 | I | T | IT | possibly damaging |
| rs1800257 | NP_004001 | I | T | IT | possibly damaging |
| rs1800259 | NP_000100 | L | I | LI | benign            |
| rs1800259 | NP_003997 | L | I | LI | benign            |
| rs1800259 | NP_003998 | L | I | LI | benign            |
| rs1800259 | NP_004000 | L | I | LI | benign            |
| rs1800259 | NP_004001 | L | I | LI | benign            |
| rs1800260 | NP_000100 | A | G | AG | benign            |
| rs1800260 | NP_003997 | A | G | AG | benign            |
| rs1800260 | NP_003998 | A | G | AG | benign            |
| rs1800260 | NP_004000 | A | G | AG | benign            |
| rs1800260 | NP_004001 | A | G | AG | benign            |
| rs1800262 | NP_000100 | V | F | VF | possibly damaging |
| rs1800262 | NP_003997 | V | F | VF | possibly damaging |
| rs1800262 | NP_003998 | V | F | VF | possibly damaging |
| rs1800262 | NP_004000 | V | F | VF | possibly damaging |
| rs1800262 | NP_004001 | V | F | VF | possibly damaging |
| rs1800263 | NP_000100 | K | N | KN | benign            |
| rs1800263 | NP_003997 | K | N | KN | benign            |
| rs1800263 | NP_003998 | K | N | KN | benign            |
| rs1800263 | NP_004000 | K | N | KN | benign            |
| rs1800263 | NP_004002 | K | N | KN | benign            |
| rs1800263 | NP_004003 | K | N | KN | benign            |
| rs1800263 | NP_004001 | K | N | KN | benign            |
| rs1800266 | NP_000100 | Q | H | QH | possibly damaging |
| rs1800266 | NP_003997 | Q | H | QH | possibly damaging |
| rs1800266 | NP_003998 | Q | H | QH | possibly damaging |
| rs1800266 | NP_004000 | Q | H | QH | possibly damaging |
| rs1800266 | NP_004001 | Q | H | QH | possibly damaging |
| rs1800269 | NP_000100 | T | I | TI | possibly damaging |
| rs1800269 | NP_003997 | T | I | TI | possibly damaging |
| rs1800269 | NP_003998 | T | I | TI | possibly damaging |
| rs1800269 | NP_004000 | T | I | TI | possibly damaging |
| rs1800269 | NP_004001 | T | I | TI | possibly damaging |
| rs1800270 | NP_000100 | A | P | AP | benign            |
| rs1800270 | NP_003997 | A | P | AP | benign            |
| rs1800270 | NP_003998 | A | P | AP | benign            |
| rs1800270 | NP_004000 | A | P | AP | benign            |
| rs1800270 | NP_004001 | A | P | AP | benign            |
| rs1800271 | NP_000100 | N | S | NS | benign            |
| rs1800271 | NP_003997 | N | S | NS | benign            |

|           |           |   |   |    |                   |
|-----------|-----------|---|---|----|-------------------|
| rs1800271 | NP_003998 | N | S | NS | benign            |
| rs1800271 | NP_004000 | N | S | NS | benign            |
| rs1800271 | NP_004002 | N | S | NS | benign            |
| rs1800271 | NP_004003 | N | S | NS | benign            |
| rs1800271 | NP_004001 | N | S | NS | benign            |
| rs1800273 | NP_000100 | R | W | RW | possibly damaging |
| rs1800273 | NP_003997 | R | W | RW | possibly damaging |
| rs1800273 | NP_003998 | R | W | RW | possibly damaging |
| rs1800273 | NP_004000 | R | W | RW | possibly damaging |
| rs1800273 | NP_004002 | R | W | RW | possibly damaging |
| rs1800273 | NP_004003 | R | W | RW | possibly damaging |
| rs1800273 | NP_004001 | R | W | RW | possibly damaging |
| rs1800275 | NP_000100 | Q | K | QK | benign            |
| rs1800275 | NP_003997 | Q | K | QK | benign            |
| rs1800275 | NP_003998 | Q | K | QK | benign            |
| rs1800275 | NP_004000 | Q | K | QK | benign            |
| rs1800275 | NP_004002 | Q | K | QK | benign            |
| rs1800275 | NP_004003 | Q | K | QK | benign            |
| rs1800275 | NP_004001 | Q | K | QK | benign            |
| rs1800278 | NP_000100 | N | D | ND | benign            |
| rs1800278 | NP_003997 | N | D | ND | benign            |
| rs1800278 | NP_003998 | N | D | ND | benign            |
| rs1800278 | NP_004000 | N | D | ND | benign            |
| rs1800278 | NP_004002 | N | D | ND | benign            |
| rs1800278 | NP_004003 | N | D | ND | benign            |
| rs1800278 | NP_004005 | N | D | ND | benign            |
| rs1800278 | NP_004011 | N | D | ND | benign            |
| rs1800278 | NP_004012 | N | D | ND | benign            |
| rs1800278 | NP_004013 | N | D | ND | benign            |
| rs1800278 | NP_004014 | N | D | ND | benign            |
| rs1800278 | NP_004001 | N | D | ND | benign            |
| rs1800278 | NP_004004 | N | D | ND | benign            |
| rs1800279 | NP_000100 | H | R | HR | benign            |
| rs1800279 | NP_003997 | H | R | HR | benign            |
| rs1800279 | NP_003998 | H | R | HR | benign            |
| rs1800279 | NP_004000 | H | R | HR | benign            |
| rs1800279 | NP_004002 | H | R | HR | benign            |
| rs1800279 | NP_004003 | H | R | HR | benign            |
| rs1800279 | NP_004005 | H | R | HR | benign            |
| rs1800279 | NP_004011 | H | R | HR | benign            |
| rs1800279 | NP_004012 | H | R | HR | benign            |
| rs1800279 | NP_004013 | H | R | HR | benign            |
| rs1800279 | NP_004014 | H | R | HR | benign            |
| rs1800279 | NP_004001 | H | R | HR | benign            |
| rs1800279 | NP_004004 | H | R | HR | benign            |
| rs1800280 | NP_004002 | Q | R | QR | benign            |

|           |           |   |   |    |                   |
|-----------|-----------|---|---|----|-------------------|
| rs1800280 | NP_004003 | Q | R | QR | benign            |
| rs1800280 | NP_004005 | Q | R | QR | benign            |
| rs1800280 | NP_004011 | Q | R | QR | benign            |
| rs1800280 | NP_004012 | Q | R | QR | benign            |
| rs1800280 | NP_004013 | Q | R | QR | benign            |
| rs1800280 | NP_004014 | Q | R | QR | benign            |
| rs1800280 | NP_000100 | Q | R | QR | possibly damaging |
| rs1800280 | NP_003997 | Q | R | QR | possibly damaging |
| rs1800280 | NP_003998 | Q | R | QR | possibly damaging |
| rs1800280 | NP_004000 | Q | R | QR | possibly damaging |
| rs1800280 | NP_004001 | Q | R | QR | possibly damaging |
| rs1800280 | NP_004004 | Q | R | QR | possibly damaging |
| rs1800282 | NP_000126 | V | D | VD | benign            |
| rs1800288 | NP_000123 | D | V | DV | probably damaging |
| rs1800291 | NP_000123 | D | E | DE | benign            |
| rs1800294 | NP_000123 | L | P | LP | benign            |
| rs1800299 | NP_000143 | D | N | DN | possibly damaging |
| rs1800307 | NP_000143 | G | S | GS | possibly damaging |
| rs1800309 | NP_000143 | E | K | EK | benign            |
| rs1800312 | NP_000143 | W | C | WC | probably damaging |
| rs1800314 | NP_000143 | V | I | VI | benign            |
| rs1800315 | NP_000143 | T | I | TI | possibly damaging |
| rs1800321 | NP_000522 | K | R | KR | benign            |
| rs1800324 | NP_000522 | L | P | LP | probably damaging |
| rs1800354 | NP_000222 | S | N | SN | benign            |
| rs1800371 | NP_000537 | P | S | PS | benign            |
| rs1800377 | NP_000543 | I | V | IV | benign            |
| rs1800378 | NP_000543 | H | R | HR | benign            |
| rs1800383 | NP_000543 | H | D | HD | benign            |
| rs1800385 | NP_000543 | V | L | VL | benign            |
| rs1800386 | NP_000543 | Y | C | YC | probably damaging |
| rs1800387 | NP_000543 | N | K | NK | benign            |
| rs1800390 | NP_000544 | T | A | TA | benign            |
| rs1800391 | NP_000544 | M | I | MI | possibly damaging |
| rs1800407 | NP_000266 | R | Q | RQ | benign            |
| rs1800408 | NP_000266 | L | F | LF | benign            |
| rs1800413 | NP_000266 | T | I | TI | possibly damaging |
| rs1800414 | NP_000266 | H | R | HR | probably damaging |
| rs1800417 | NP_000266 | I | T | IT | possibly damaging |
| rs1800422 | NP_000363 | R | Q | RQ | possibly damaging |
| rs1800425 | NP_001155 | N | S | NS | benign            |
| rs1800425 | NP_663722 | N | S | NS | benign            |
| rs1800429 | NP_000511 | V | M | VM | benign            |
| rs1800430 | NP_000511 | N | D | ND | benign            |
| rs1800431 | NP_000511 | V | I | VI | benign            |
| rs1800433 | NP_000005 | C | Y | CY | probably damaging |

|           |           |   |   |    |                   |
|-----------|-----------|---|---|----|-------------------|
| rs1800434 | NP_000005 | R | H | RH | probably damaging |
| rs1800435 | NP_000022 | K | N | KN | benign            |
| rs1800436 | NP_000155 | A | V | AV | benign            |
| rs1800437 | NP_000155 | E | Q | EQ | benign            |
| rs1800439 | NP_000119 | W | R | WR | probably damaging |
| rs1800440 | NP_000095 | N | S | NS | possibly damaging |
| rs1800443 | NP_000788 | V | G | VG | possibly damaging |
| rs1800445 | NP_000167 | N | S | NS | benign            |
| rs1800447 | NP_000885 | W | R | WR | benign            |
| rs1800449 | NP_002308 | R | Q | RQ | benign            |
| rs1800450 | NP_000233 | G | D | GD | probably damaging |
| rs1800451 | NP_000233 | G | E | GE | probably damaging |
| rs1800452 | NP_000570 | R | Q | RQ | benign            |
| rs1800453 | NP_000584 | D | G | DG | benign            |
| rs1800456 | NP_000265 | L | F | LF | benign            |
| rs1800457 | NP_015565 | T | S | TS | benign            |
| rs1800458 | NP_000362 | G | S | GS | benign            |
| rs1800461 | NP_667342 | L | M | LM | benign            |
| rs1800461 | NP_000146 | L | M | LM | benign            |
| rs1800461 | NP_667343 | L | M | LM | benign            |
| rs1800462 | NP_000358 | A | P | AP | possibly damaging |
| rs1800466 | NP_000231 | K | R | KR | possibly damaging |
| rs1800467 | NP_000516 | L | V | LV | benign            |
| rs1800476 | NP_000375 | V | I | VI | benign            |
| rs1800477 | NP_000624 | A | T | AT | benign            |
| rs1800477 | NP_000648 | A | T | AT | benign            |
| rs1800493 | NP_002328 | V | M | VM | benign            |
| rs1800496 | NP_057658 | P | S | PS | benign            |
| rs1800496 | NP_000786 | P | S | PS | benign            |
| rs1800497 | NP_848605 | E | K | EK | benign            |
| rs1800520 | NP_000374 | S | R | SR | benign            |
| rs1800527 | NP_004928 | K | R | KR | benign            |
| rs1800546 | NP_000026 | A | P | AP | probably damaging |
| rs1800548 | NP_000341 | E | K | EK | benign            |
| rs1800549 | NP_000341 | T | M | TM | benign            |
| rs1800550 | NP_000341 | R | S | RS | benign            |
| rs1800551 | NP_000341 | G | R | GR | benign            |
| rs1800552 | NP_000341 | R | H | RH | probably damaging |
| rs1800553 | NP_000341 | G | E | GE | probably damaging |
| rs1800554 | NP_000341 | L | F | LF | benign            |
| rs1800555 | NP_000341 | D | N | DN | benign            |
| rs1800556 | NP_000008 | R | W | RW | benign            |
| rs1800557 | NP_958816 | A | V | AV | benign            |
| rs1800557 | NP_958817 | A | V | AV | benign            |
| rs1800557 | NP_000475 | A | V | AV | probably damaging |
| rs1800559 | NP_000060 | R | H | RH | probably damaging |

|           |           |   |   |    |                   |
|-----------|-----------|---|---|----|-------------------|
| rs1800561 | NP_001766 | R | W | RW | possibly damaging |
| rs1800562 | NP_620572 | C | Y | CY | probably damaging |
| rs1800562 | NP_620573 | C | Y | CY | probably damaging |
| rs1800562 | NP_620575 | C | Y | CY | probably damaging |
| rs1800562 | NP_620576 | C | Y | CY | probably damaging |
| rs1800562 | NP_620577 | C | Y | CY | probably damaging |
| rs1800562 | NP_620578 | C | Y | CY | probably damaging |
| rs1800562 | NP_620579 | C | Y | CY | probably damaging |
| rs1800562 | NP_000401 | C | Y | CY | probably damaging |
| rs1800564 | NP_000221 | V | M | VM | benign            |
| rs1800565 | NP_000247 | R | H | RH | benign            |
| rs1800566 | NP_000894 | P | S | PS | possibly damaging |
| rs1800567 | NP_006202 | G | D | GD | possibly damaging |
| rs1800571 | NP_619726 | P | Q | PQ | probably damaging |
| rs1800572 | NP_000331 | V | I | VI | benign            |
| rs1800573 | NP_000535 | D | G | DG | possibly damaging |
| rs1800573 | NP_061313 | D | G | DG | possibly damaging |
| rs1800574 | NP_000536 | A | V | AV | benign            |
| rs1800576 | NP_000352 | A | T | AT | benign            |
| rs1800577 | NP_000352 | G | A | GA | benign            |
| rs1800578 | NP_000352 | P | S | PS | possibly damaging |
| rs1800579 | NP_000352 | P | L | PL | possibly damaging |
| rs1800582 | NP_002090 | G | R | GR | benign            |
| rs1800595 | NP_000121 | H | R | HR | possibly damaging |
| rs1800620 | NP_000585 | A | T | AT | benign            |
| rs1800670 | NP_009034 | I | F | IF | possibly damaging |
| rs1800704 | NP_009230 | M | I | MI | possibly damaging |
| rs1800704 | NP_009231 | M | I | MI | possibly damaging |
| rs1800704 | NP_009232 | M | I | MI | possibly damaging |
| rs1800704 | NP_009233 | M | I | MI | possibly damaging |
| rs1800704 | NP_009228 | M | I | MI | possibly damaging |
| rs1800707 | NP_009229 | K | N | KN | benign            |
| rs1800707 | NP_009234 | K | N | KN | benign            |
| rs1800707 | NP_009236 | K | N | KN | benign            |
| rs1800707 | NP_009235 | K | N | KN | benign            |
| rs1800707 | NP_009230 | K | N | KN | possibly damaging |
| rs1800707 | NP_009231 | K | N | KN | possibly damaging |
| rs1800707 | NP_009232 | K | N | KN | possibly damaging |
| rs1800707 | NP_009233 | K | N | KN | possibly damaging |
| rs1800707 | NP_009228 | K | N | KN | possibly damaging |
| rs1800709 | NP_009230 | R | W | RW | possibly damaging |
| rs1800709 | NP_009231 | R | W | RW | possibly damaging |
| rs1800709 | NP_009232 | R | W | RW | possibly damaging |
| rs1800709 | NP_009233 | R | W | RW | possibly damaging |
| rs1800709 | NP_009228 | R | W | RW | possibly damaging |
| rs1800725 | NP_066399 | R | Q | RQ | benign            |

|           |           |   |   |    |                   |
|-----------|-----------|---|---|----|-------------------|
| rs1800725 | NP_066400 | R | Q | RQ | benign            |
| rs1800725 | NP_000539 | R | Q | RQ | benign            |
| rs1800726 | NP_009233 | A | P | AP | benign            |
| rs1800726 | NP_009234 | A | P | AP | benign            |
| rs1800726 | NP_009236 | A | P | AP | benign            |
| rs1800726 | NP_009228 | A | P | AP | benign            |
| rs1800726 | NP_009235 | A | P | AP | benign            |
| rs1800729 | NP_066399 | A | T | AT | benign            |
| rs1800729 | NP_066400 | A | T | AT | benign            |
| rs1800729 | NP_000539 | A | T | AT | benign            |
| rs1800730 | NP_620572 | S | C | SC | benign            |
| rs1800730 | NP_620573 | S | C | SC | benign            |
| rs1800730 | NP_620571 | S | C | SC | possibly damaging |
| rs1800730 | NP_620574 | S | C | SC | possibly damaging |
| rs1800730 | NP_620575 | S | C | SC | possibly damaging |
| rs1800730 | NP_620578 | S | C | SC | possibly damaging |
| rs1800730 | NP_000401 | S | C | SC | possibly damaging |
| rs1800744 | NP_009229 | S | I | SI | possibly damaging |
| rs1800744 | NP_009233 | S | I | SI | possibly damaging |
| rs1800744 | NP_009234 | S | I | SI | possibly damaging |
| rs1800744 | NP_009236 | S | I | SI | possibly damaging |
| rs1800744 | NP_009228 | S | I | SI | possibly damaging |
| rs1800744 | NP_009235 | S | I | SI | possibly damaging |
| rs1800746 | NP_000382 | Q | R | QR | benign            |
| rs1800748 | NP_066399 | M | V | MV | benign            |
| rs1800748 | NP_066400 | M | V | MV | benign            |
| rs1800748 | NP_000539 | M | V | MV | benign            |
| rs1800751 | NP_009233 | P | S | PS | probably damaging |
| rs1800751 | NP_009234 | P | S | PS | probably damaging |
| rs1800751 | NP_009236 | P | S | PS | probably damaging |
| rs1800751 | NP_009228 | P | S | PS | probably damaging |
| rs1800751 | NP_009235 | P | S | PS | probably damaging |
| rs1800757 | NP_009229 | P | S | PS | probably damaging |
| rs1800757 | NP_009233 | P | S | PS | probably damaging |
| rs1800757 | NP_009234 | P | S | PS | probably damaging |
| rs1800757 | NP_009236 | P | S | PS | probably damaging |
| rs1800757 | NP_009228 | P | S | PS | probably damaging |
| rs1800757 | NP_009235 | P | S | PS | probably damaging |
| rs1800762 | NP_000789 | P | Q | PQ | benign            |
| rs1800777 | NP_000069 | R | Q | RQ | benign            |
| rs1800866 | NP_671515 | Q | P | QP | benign            |
| rs1800866 | NP_005857 | Q | P | QP | benign            |
| rs1800866 | NP_671513 | Q | P | QP | benign            |
| rs1800867 | NP_006744 | T | M | TM | benign            |
| rs1800884 | NP_005949 | A | V | AV | benign            |
| rs1800885 | NP_005949 | R | W | RW | probably damaging |



|           |           |   |   |    |                   |
|-----------|-----------|---|---|----|-------------------|
| rs1800888 | NP_000015 | T | I | TI | possibly damaging |
| rs1800938 | NP_000170 | E | D | ED | benign            |
| rs1800939 | NP_000570 | A | S | AS | benign            |
| rs1800940 | NP_000570 | R | S | RS | possibly damaging |
| rs1800943 | NP_000570 | G | V | GV | possibly damaging |
| rs1800944 | NP_000570 | A | V | AV | benign            |
| rs1800945 | NP_000570 | Y | F | YF | benign            |
| rs1800956 | NP_000109 | D | H | DH | possibly damaging |
| rs1800961 | NP_000448 | T | I | TI | benign            |
| rs1800961 | NP_849180 | T | I | TI | benign            |
| rs1800961 | NP_849181 | T | I | TI | benign            |
| rs1800967 | NP_005209 | A | V | AV | benign            |
| rs1800968 | NP_005209 | C | S | CS | probably damaging |
| rs1800973 | NP_000230 | T | N | TN | benign            |
| rs1800974 | NP_002197 | H | R | HR | benign            |
| rs1800991 | NP_077078 | K | N | KN | benign            |
| rs1800991 | NP_003285 | N | K | NK | benign            |
| rs1800992 | NP_077078 | T | A | TA | benign            |
| rs1800992 | NP_003285 | T | A | TA | benign            |
| rs1801013 | NP_001941 | T | P | TP | benign            |
| rs1801016 | NP_003836 | D | V | DV | probably damaging |
| rs1801019 | NP_000364 | G | A | GA | benign            |
| rs1801021 | NP_114438 | T | P | TP | possibly damaging |
| rs1801022 | NP_478102 | P | L | PL | probably damaging |
| rs1801028 | NP_057658 | S | C | SC | benign            |
| rs1801028 | NP_000786 | S | C | SC | possibly damaging |
| rs1801030 | NP_001046 | V | M | VM | benign            |
| rs1801030 | NP_803565 | V | M | VM | benign            |
| rs1801030 | NP_803566 | V | M | VM | benign            |
| rs1801030 | NP_803878 | V | M | VM | benign            |
| rs1801030 | NP_803880 | V | M | VM | benign            |
| rs1801033 | NP_000056 | E | A | EA | possibly damaging |
| rs1801058 | NP_005298 | A | V | AV | benign            |
| rs1801058 | NP_892027 | A | V | AV | benign            |
| rs1801077 | NP_037453 | A | P | AP | benign            |
| rs1801086 | NP_000531 | G | R | GR | probably damaging |
| rs1801105 | NP_008826 | T | I | TI | possibly damaging |
| rs1801108 | NP_005535 | P | R | PR | probably damaging |
| rs1801109 | NP_694592 | A | D | AD | probably damaging |
| rs1801109 | NP_002028 | A | D | AD | probably damaging |
| rs1801109 | NP_694593 | A | D | AD | probably damaging |
| rs1801111 | NP_001613 | F | S | FS | benign            |
| rs1801114 | NP_000386 | V | M | VM | benign            |
| rs1801115 | NP_000386 | G | V | GV | probably damaging |
| rs1801118 | NP_005535 | M | T | MT | possibly damaging |
| rs1801120 | NP_005535 | S | F | SF | possibly damaging |

|           |           |   |   |    |                   |
|-----------|-----------|---|---|----|-------------------|
| rs1801121 | NP_694592 | I | F | IF | probably damaging |
| rs1801121 | NP_002028 | I | F | IF | probably damaging |
| rs1801121 | NP_694593 | I | F | IF | probably damaging |
| rs1801122 | NP_000386 | P | T | PT | probably damaging |
| rs1801124 | NP_005347 | T | M | TM | benign            |
| rs1801128 | NP_002533 | S | T | ST | benign            |
| rs1801128 | NP_058213 | V | L | VL | benign            |
| rs1801131 | NP_005948 | A | E | AE | possibly damaging |
| rs1801133 | NP_005948 | A | V | AV | benign            |
| rs1801155 | NP_000029 | I | K | IK | possibly damaging |
| rs1801164 | NP_003595 | H | D | HD | probably damaging |
| rs1801165 | NP_003595 | K | T | KT | benign            |
| rs1801166 | NP_000029 | E | Q | EQ | benign            |
| rs1801175 | NP_000142 | R | C | RC | probably damaging |
| rs1801176 | NP_000142 | R | H | RH | possibly damaging |
| rs1801177 | NP_000228 | D | N | DN | possibly damaging |
| rs1801178 | NP_000483 | I | V | IV | benign            |
| rs1801187 | NP_000100 | R | H | RH | possibly damaging |
| rs1801187 | NP_003997 | R | H | RH | possibly damaging |
| rs1801187 | NP_003998 | R | H | RH | possibly damaging |
| rs1801187 | NP_004000 | R | H | RH | possibly damaging |
| rs1801187 | NP_004002 | R | H | RH | possibly damaging |
| rs1801187 | NP_004003 | R | H | RH | possibly damaging |
| rs1801187 | NP_004001 | R | H | RH | possibly damaging |
| rs1801197 | NP_001733 | L | P | LP | benign            |
| rs1801198 | NP_000346 | R | P | RP | benign            |
| rs1801200 | NP_004439 | V | I | VI | benign            |
| rs1801201 | NP_004439 | I | V | IV | benign            |
| rs1801203 | NP_000439 | A | V | AV | benign            |
| rs1801204 | NP_001599 | S | T | ST | benign            |
| rs1801208 | NP_005996 | R | H | RH | possibly damaging |
| rs1801212 | NP_005996 | I | V | IV | benign            |
| rs1801216 | XP_208313 | A | V | AV | benign            |
| rs1801220 | NP_001072 | F | I | FI | possibly damaging |
| rs1801222 | NP_001072 | S | F | SF | possibly damaging |
| rs1801224 | NP_001072 | P | T | PT | benign            |
| rs1801227 | NP_001072 | Y | H | YH | benign            |
| rs1801230 | NP_001072 | T | I | TI | possibly damaging |
| rs1801231 | NP_001072 | P | S | PS | benign            |
| rs1801232 | NP_001072 | N | K | NK | benign            |
| rs1801235 | NP_001072 | L | F | LF | benign            |
| rs1801236 | NP_001072 | P | R | PR | possibly damaging |
| rs1801237 | NP_001072 | G | R | GR | probably damaging |
| rs1801238 | NP_001072 | L | I | LI | benign            |
| rs1801239 | NP_001072 | I | V | IV | benign            |
| rs1801240 | NP_001072 | E | G | EG | possibly damaging |

|           |           |   |   |    |                   |
|-----------|-----------|---|---|----|-------------------|
| rs1801243 | NP_000044 | S | A | SA | benign            |
| rs1801244 | NP_000044 | V | L | VL | benign            |
| rs1801249 | NP_000044 | V | A | VA | benign            |
| rs1801251 | NP_002233 | I | T | IT | benign            |
| rs1801252 | NP_000675 | S | G | SG | possibly damaging |
| rs1801253 | NP_000675 | G | R | GR | possibly damaging |
| rs1801255 | NP_958933 | Q | H | QH | benign            |
| rs1801255 | NP_958932 | Q | H | QH | benign            |
| rs1801255 | NP_005673 | Q | H | QH | benign            |
| rs1801256 | NP_000048 | S | T | ST | benign            |
| rs1801257 | NP_958933 | S | R | SR | benign            |
| rs1801257 | NP_958932 | S | R | SR | benign            |
| rs1801257 | NP_005673 | S | R | SR | benign            |
| rs1801262 | NP_002491 | A | T | AT | benign            |
| rs1801268 | NP_000101 | V | F | VF | probably damaging |
| rs1801269 | NP_000341 | R | L | RL | probably damaging |
| rs1801270 | NP_510867 | S | R | SR | benign            |
| rs1801271 | NP_005202 | Y | C | YC | probably damaging |
| rs1801272 | NP_000753 | L | H | LH | probably damaging |
| rs1801273 | NP_001434 | A | T | AT | benign            |
| rs1801274 | NP_067674 | R | H | RH | benign            |
| rs1801275 | NP_000409 | Q | R | QR | benign            |
| rs1801276 | NP_005535 | A | P | AP | benign            |
| rs1801277 | NP_005535 | S | G | SG | benign            |
| rs1801278 | NP_005535 | G | R | GR | probably damaging |
| rs1801279 | NP_000006 | R | Q | RQ | possibly damaging |
| rs1801280 | NP_000006 | I | T | IT | benign            |
| rs1801281 | NP_004549 | A | S | AS | benign            |
| rs1801282 | NP_056953 | P | A | PA | possibly damaging |
| rs1801284 | NP_036424 | R | H | RH | benign            |
| rs1801285 | NP_872575 | E | D | ED | benign            |
| rs1801285 | NP_872577 | E | D | ED | benign            |
| rs1801285 | NP_000186 | E | D | ED | benign            |
| rs1801286 | NP_872577 | A | V | AV | benign            |
| rs1801286 | NP_000186 | A | V | AV | benign            |
| rs1801288 | NP_004539 | A | V | AV | benign            |
| rs1801311 | NP_002481 | A | V | AV | benign            |
| rs1801316 | NP_004532 | G | R | GR | probably damaging |
| rs1801323 | NP_543142 | M | L | ML | benign            |
| rs1801328 | NP_004327 | E | D | ED | benign            |
| rs1801329 | NP_005339 | D | A | DA | possibly damaging |
| rs1801334 | NP_054642 | D | N | DN | benign            |
| rs1801334 | NP_054643 | D | N | DN | benign            |
| rs1801334 | NP_004553 | D | N | DN | benign            |
| rs1801350 | NP_064621 | D | H | DH | probably damaging |
| rs1801351 | NP_003309 | K | R | KR | benign            |

|           |           |   |   |    |                   |
|-----------|-----------|---|---|----|-------------------|
| rs1801369 | NP_000341 | S | I | SI | possibly damaging |
| rs1801376 | NP_001202 | Q | R | QR | benign            |
| rs1801394 | NP_076915 | M | I | MI | benign            |
| rs1801394 | NP_002445 | M | I | MI | benign            |
| rs1801397 | NP_002027 | T | K | TK | possibly damaging |
| rs1801404 | NP_666023 | W | L | WL | probably damaging |
| rs1801417 | NP_006824 | N | S | NS | possibly damaging |
| rs1801421 | NP_434698 | G | R | GR | probably damaging |
| rs1801421 | NP_005789 | G | R | GR | probably damaging |
| rs1801421 | NP_998755 | G | R | GR | probably damaging |
| rs1801426 | NP_000050 | I | V | IV | benign            |
| rs1801431 | NP_006125 | A | V | AV | benign            |
| rs1801442 | NP_006039 | R | G | RG | probably damaging |
| rs1801449 | NP_077320 | A | T | AT | benign            |
| rs1801449 | NP_775110 | A | T | AT | benign            |
| rs1801449 | NP_997629 | A | T | AT | benign            |
| rs1801449 | NP_997630 | A | T | AT | benign            |
| rs1801449 | NP_000061 | A | T | AT | benign            |
| rs1801455 | NP_543142 | R | T | RT | possibly damaging |
| rs1801466 | NP_000341 | N | I | NI | possibly damaging |
| rs1801467 | NP_852470 | E | D | ED | benign            |
| rs1801467 | NP_258412 | E | D | ED | benign            |
| rs1801474 | NP_054642 | S | N | SN | benign            |
| rs1801474 | NP_004553 | S | N | SN | benign            |
| rs1801475 | NP_004509 | N | T | NT | benign            |
| rs1801475 | NP_742104 | N | T | NT | benign            |
| rs1801475 | NP_742106 | N | T | NT | benign            |
| rs1801475 | NP_742105 | N | T | NT | benign            |
| rs1801482 | NP_002027 | T | K | TK | possibly damaging |
| rs1801505 | NP_077320 | E | K | EK | benign            |
| rs1801505 | NP_775110 | E | K | EK | benign            |
| rs1801505 | NP_997629 | E | K | EK | benign            |
| rs1801505 | NP_997630 | E | K | EK | benign            |
| rs1801505 | NP_000061 | E | K | EK | benign            |
| rs1801514 | NP_003063 | M | I | MI | possibly damaging |
| rs1801516 | NP_000042 | D | N | DN | benign            |
| rs1801516 | NP_612149 | D | N | DN | possibly damaging |
| rs1801518 | NP_543142 | S | N | SN | possibly damaging |
| rs1801528 | NP_001202 | V | A | VA | benign            |
| rs1801567 | NP_219486 | V | L | VL | benign            |
| rs1801581 | NP_000341 | R | Q | RQ | benign            |
| rs1801582 | NP_054643 | V | L | VL | benign            |
| rs1801582 | NP_004553 | V | L | VL | benign            |
| rs1801587 | NP_077002 | Y | C | YC | probably damaging |
| rs1801612 | NP_000288 | I | V | IV | benign            |
| rs1801673 | NP_612149 | D | V | DV | probably damaging |

|           |           |   |   |    |                   |
|-----------|-----------|---|---|----|-------------------|
| rs1801673 | NP_000042 | D | V | DV | probably damaging |
| rs1801674 | NP_067653 | Q | K | QK | benign            |
| rs1801685 | NP_000319 | S | I | SI | benign            |
| rs1801687 | NP_000319 | R | K | RK | benign            |
| rs1801688 | NP_000319 | G | E | GE | probably damaging |
| rs1801689 | NP_000033 | C | G | CG | probably damaging |
| rs1801690 | NP_000033 | W | S | WS | probably damaging |
| rs1801692 | NP_000033 | S | N | SN | benign            |
| rs1801694 | NP_000375 | A | T | AT | benign            |
| rs1801695 | NP_000375 | A | T | AT | benign            |
| rs1801696 | NP_000375 | E | K | EK | benign            |
| rs1801698 | NP_000375 | T | A | TA | benign            |
| rs1801699 | NP_000375 | N | S | NS | benign            |
| rs1801701 | NP_000375 | R | Q | RQ | benign            |
| rs1801702 | NP_000375 | R | T | RT | possibly damaging |
| rs1801703 | NP_000375 | V | M | VM | benign            |
| rs1801710 | NP_003982 | G | S | GS | benign            |
| rs1801710 | NP_000106 | G | S | GS | benign            |
| rs1801714 | NP_000192 | P | L | PL | probably damaging |
| rs1801715 | NP_000566 | D | H | DH | possibly damaging |
| rs1801716 | NP_000891 | K | E | KE | benign            |
| rs1801725 | NP_000379 | A | S | AS | benign            |
| rs1801726 | NP_000379 | Q | E | QE | benign            |
| rs1801733 | NP_004868 | T | K | TK | benign            |
| rs1801749 | NP_005774 | V | F | VF | benign            |
| rs1801753 | NP_036465 | E | D | ED | benign            |
| rs1801804 | NP_002584 | S | P | SP | benign            |
| rs1801811 | NP_003592 | K | E | KE | benign            |
| rs1801849 | NP_001341 | Q | H | QH | possibly damaging |
| rs1801850 | NP_001341 | K | R | KR | benign            |
| rs1801855 | NP_004778 | V | D | VD | probably damaging |
| rs1801863 | NP_055530 | V | A | VA | benign            |
| rs1801870 | NP_055664 | S | T | ST | benign            |
| rs1801893 | NP_055720 | K | T | KT | possibly damaging |
| rs1801902 | NP_074035 | T | A | TA | benign            |
| rs1801902 | NP_002465 | T | A | TA | benign            |
| rs1801913 | NP_057295 | P | T | PT | probably damaging |
| rs1801913 | NP_055748 | P | T | PT | probably damaging |
| rs1801914 | NP_055759 | S | Y | SY | benign            |
| rs1801916 | XP_376328 | L | I | LI | benign            |
| rs1801932 | NP_057943 | W | C | WC | probably damaging |
| rs1801951 | NP_036232 | S | T | ST | benign            |
| rs1801955 | NP_006614 | W | R | WR | probably damaging |
| rs1801956 | NP_003453 | P | L | PL | possibly damaging |
| rs1801962 | NP_006336 | L | S | LS | possibly damaging |
| rs1801963 | NP_004077 | P | S | PS | benign            |

|           |           |   |   |    |                   |
|-----------|-----------|---|---|----|-------------------|
| rs1801964 | NP_004578 | A | D | AD | possibly damaging |
| rs1801968 | NP_000104 | D | H | DH | benign            |
| rs1801983 | NP_477352 | N | I | NI | probably damaging |
| rs1801989 | NP_001272 | P | L | PL | probably damaging |
| rs1801990 | NP_001272 | P | Q | PQ | probably damaging |
| rs1802002 | NP_006310 | R | C | RC | possibly damaging |
| rs1802010 | NP_036234 | R | H | RH | benign            |
| rs1802033 | NP_059830 | R | W | RW | probably damaging |
| rs1802050 | NP_006205 | C | F | CF | probably damaging |
| rs1802054 | NP_003575 | R | L | RL | possibly damaging |
| rs1802055 | NP_002767 | K | E | KE | benign            |
| rs1802055 | NP_665895 | K | E | KE | benign            |
| rs1802064 | NP_006422 | R | I | RI | benign            |
| rs1802065 | NP_006421 | L | F | LF | possibly damaging |
| rs1802069 | NP_006421 | R | L | RL | benign            |
| rs1802070 | NP_005872 | R | C | RC | probably damaging |
| rs1802073 | NP_003005 | P | T | PT | benign            |
| rs1802074 | NP_003005 | R | K | RK | benign            |
| rs1802087 | NP_004519 | G | C | GC | possibly damaging |
| rs1802088 | NP_004519 | P | S | PS | possibly damaging |
| rs1802089 | NP_003954 | A | S | AS | benign            |
| rs1802117 | NP_005434 | Q | R | QR | possibly damaging |
| rs1802118 | NP_003208 | L | P | LP | possibly damaging |
| rs1802130 | NP_002796 | M | K | MK | probably damaging |
| rs1802131 | NP_002796 | D | V | DV | probably damaging |
| rs1802164 | NP_004598 | E | G | EG | possibly damaging |
| rs1802188 | NP_000425 | V | L | VL | benign            |
| rs1802191 | NP_150632 | H | Y | HY | possibly damaging |
| rs1802198 | NP_005678 | R | Q | RQ | possibly damaging |
| rs1802201 | NP_066565 | D | N | DN | possibly damaging |
| rs1802207 | NP_003631 | L | M | LM | benign            |
| rs1802222 | NP_004533 | L | F | LF | benign            |
| rs1802224 | NP_004995 | S | P | SP | benign            |
| rs1802228 | NP_002916 | A | V | AV | benign            |
| rs1802237 | NP_004068 | Q | E | QE | benign            |
| rs1802238 | NP_002483 | K | N | KN | benign            |
| rs1802241 | NP_852131 | V | L | VL | benign            |
| rs1802241 | NP_852132 | V | L | VL | benign            |
| rs1802241 | NP_852134 | V | L | VL | benign            |
| rs1802241 | NP_852133 | V | L | VL | benign            |
| rs1802247 | NP_004863 | A | T | AT | benign            |
| rs1802257 | NP_004716 | D | N | DN | benign            |
| rs1802258 | NP_002609 | G | C | GC | probably damaging |
| rs1802280 | NP_005877 | F | V | FV | probably damaging |
| rs1802285 | NP_009034 | A | S | AS | possibly damaging |
| rs1802288 | NP_003261 | A | T | AT | benign            |

|           |           |   |   |    |                   |
|-----------|-----------|---|---|----|-------------------|
| rs1802323 | NP_004262 | M | V | MV | benign            |
| rs1802327 | NP_036211 | N | K | NK | possibly damaging |
| rs1802338 | NP_004576 | G | E | GE | possibly damaging |
| rs1802340 | NP_004576 | A | T | AT | benign            |
| rs1802356 | NP_536351 | A | S | AS | benign            |
| rs1802356 | NP_000507 | A | S | AS | benign            |
| rs1802357 | NP_536351 | S | I | SI | probably damaging |
| rs1802357 | NP_000507 | S | I | SI | probably damaging |
| rs1802363 | NP_006351 | Q | R | QR | benign            |
| rs1802370 | NP_005081 | F | S | FS | possibly damaging |
| rs1802375 | NP_003091 | Q | R | QR | possibly damaging |
| rs1802376 | NP_683758 | D | N | DN | possibly damaging |
| rs1802376 | NP_690039 | D | N | DN | possibly damaging |
| rs1802376 | NP_003090 | D | N | DN | possibly damaging |
| rs1802377 | NP_003785 | S | F | SF | possibly damaging |
| rs1802381 | NP_001528 | N | H | NH | benign            |
| rs1802384 | NP_001528 | A | V | AV | benign            |
| rs1802394 | NP_005768 | K | T | KT | benign            |
| rs1802395 | NP_005768 | C | S | CS | probably damaging |
| rs1802399 | NP_005591 | D | E | DE | benign            |
| rs1802400 | NP_006398 | E | K | EK | benign            |
| rs1802414 | NP_003755 | E | Q | EQ | benign            |
| rs1802417 | NP_075381 | E | G | EG | possibly damaging |
| rs1802417 | NP_115784 | E | G | EG | possibly damaging |
| rs1802419 | NP_003681 | I | N | IN | possibly damaging |
| rs1802421 | NP_945320 | Q | H | QH | possibly damaging |
| rs1802421 | NP_945321 | Q | H | QH | probably damaging |
| rs1802421 | NP_001121 | Q | H | QH | probably damaging |
| rs1802422 | NP_005761 | L | F | LF | benign            |
| rs1802427 | NP_001563 | D | N | DN | benign            |
| rs1802427 | NP_004020 | D | N | DN | benign            |
| rs1802427 | NP_004022 | D | N | DN | benign            |
| rs1802433 | NP_057250 | S | F | SF | benign            |
| rs1802446 | NP_009165 | S | Y | SY | possibly damaging |
| rs1802452 | NP_004227 | T | S | TS | benign            |
| rs1802461 | NP_036569 | S | C | SC | benign            |
| rs1802462 | NP_006347 | P | T | PT | probably damaging |
| rs1802463 | NP_006347 | P | S | PS | probably damaging |
| rs1802465 | NP_006347 | W | C | WC | probably damaging |
| rs1802470 | NP_005794 | D | Y | DY | probably damaging |
| rs1802474 | NP_005490 | C | F | CF | probably damaging |
| rs1802480 | NP_003787 | A | V | AV | benign            |
| rs1802480 | NP_604431 | A | V | AV | benign            |
| rs1802483 | NP_005768 | P | S | PS | possibly damaging |
| rs1802485 | NP_009049 | D | H | DH | possibly damaging |
| rs1802492 | NP_006320 | D | Y | DY | probably damaging |

|           |           |   |   |    |                   |
|-----------|-----------|---|---|----|-------------------|
| rs1802495 | NP_003820 | R | H | RH | benign            |
| rs1802496 | NP_006386 | H | N | HN | possibly damaging |
| rs1802498 | NP_604389 | Q | E | QE | benign            |
| rs1802498 | NP_003712 | Q | E | QE | benign            |
| rs1802500 | NP_004210 | V | F | VF | possibly damaging |
| rs1802504 | NP_877495 | E | D | ED | benign            |
| rs1802504 | NP_068779 | E | D | ED | benign            |
| rs1802510 | NP_005539 | P | L | PL | probably damaging |
| rs1802516 | NP_291024 | K | N | KN | possibly damaging |
| rs1802521 | NP_004999 | T | N | TN | benign            |
| rs1802538 | NP_005246 | Y | C | YC | probably damaging |
| rs1802545 | NP_003391 | P | S | PS | probably damaging |
| rs1802548 | NP_851998 | N | D | ND | benign            |
| rs1802548 | NP_002156 | N | D | ND | benign            |
| rs1802557 | NP_004784 | F | L | FL | possibly damaging |
| rs1802559 | XP_064265 | E | G | EG | probably damaging |
| rs1802578 | NP_945320 | A | E | AE | benign            |
| rs1802578 | NP_945321 | A | E | AE | benign            |
| rs1802578 | NP_001121 | A | E | AE | benign            |
| rs1802581 | NP_055439 | N | S | NS | benign            |
| rs1802582 | NP_055439 | I | T | IT | possibly damaging |
| rs1802585 | NP_005525 | D | E | DE | benign            |
| rs1802592 | NP_002083 | N | D | ND | benign            |
| rs1802596 | NP_001972 | D | Y | DY | probably damaging |
| rs1802600 | NP_003125 | S | I | SI | benign            |
| rs1802601 | NP_003125 | P | S | PS | probably damaging |
| rs1802606 | NP_006160 | Q | K | QK | benign            |
| rs1802607 | NP_004583 | P | L | PL | probably damaging |
| rs1802611 | NP_006793 | A | S | AS | benign            |
| rs1802617 | NP_003429 | Q | H | QH | benign            |
| rs1802620 | NP_005561 | H | Y | HY | benign            |
| rs1802621 | NP_005561 | Y | C | YC | probably damaging |
| rs1802622 | NP_001680 | G | E | GE | probably damaging |
| rs1802632 | NP_003348 | T | A | TA | possibly damaging |
| rs1802634 | NP_003348 | R | G | RG | possibly damaging |
| rs1802641 | NP_036350 | S | W | SW | possibly damaging |
| rs1802641 | NP_004507 | S | W | SW | possibly damaging |
| rs1802641 | NP_703194 | S | W | SW | possibly damaging |
| rs1802643 | NP_006807 | L | R | LR | possibly damaging |
| rs1802655 | NP_009140 | V | A | VA | benign            |
| rs1802658 | NP_004438 | A | S | AS | benign            |
| rs1802664 | NP_573566 | I | M | IM | benign            |
| rs1802668 | NP_004078 | K | R | KR | benign            |
| rs1802670 | NP_006275 | L | F | LF | benign            |
| rs1802671 | NP_004483 | E | D | ED | benign            |
| rs1802683 | NP_000526 | G | A | GA | benign            |



|           |           |   |   |    |                   |
|-----------|-----------|---|---|----|-------------------|
| rs1802692 | NP_000981 | V | A | VA | possibly damaging |
| rs1802701 | NP_000996 | L | I | LI | benign            |
| rs1802705 | XP_061427 | M | I | MI | possibly damaging |
| rs1802706 | NP_004588 | S | G | SG | benign            |
| rs1802709 | NP_001317 | L | P | LP | possibly damaging |
| rs1802713 | XP_056681 | R | K | RK | benign            |
| rs1802720 | NP_001639 | Y | H | YH | benign            |
| rs1802724 | NP_001304 | E | Q | EQ | possibly damaging |
| rs1802728 | NP_005633 | K | N | KN | benign            |
| rs1802730 | NP_001087 | G | E | GE | probably damaging |
| rs1802730 | NP_942127 | G | E | GE | probably damaging |
| rs1802733 | NP_387506 | P | T | PT | probably damaging |
| rs1802736 | NP_387506 | L | F | LF | benign            |
| rs1802737 | NP_387506 | L | F | LF | benign            |
| rs1802743 | NP_002336 | G | C | GC | probably damaging |
| rs1802759 | NP_005474 | V | M | VM | benign            |
| rs1802771 | NP_002434 | I | T | IT | possibly damaging |
| rs1802774 | NP_002434 | D | A | DA | probably damaging |
| rs1802776 | NP_005750 | L | F | LF | benign            |
| rs1802779 | NP_004362 | K | N | KN | possibly damaging |
| rs1802787 | NP_001987 | C | S | CS | probably damaging |
| rs1802787 | NP_006476 | C | S | CS | probably damaging |
| rs1802787 | NP_006477 | C | S | CS | probably damaging |
| rs1802787 | NP_006478 | C | S | CS | probably damaging |
| rs1802794 | NP_066957 | Y | C | YC | benign            |
| rs1802799 | NP_002799 | T | P | TP | possibly damaging |
| rs1802800 | NP_002879 | V | L | VL | benign            |
| rs1802800 | NP_996846 | V | L | VL | benign            |
| rs1802805 | NP_068710 | A | S | AS | benign            |
| rs1802805 | NP_005962 | A | S | AS | benign            |
| rs1802821 | NP_001521 | T | A | TA | possibly damaging |
| rs1802823 | NP_006829 | K | R | KR | benign            |
| rs1802838 | NP_001939 | G | V | GV | probably damaging |
| rs1802839 | NP_938405 | P | S | PS | possibly damaging |
| rs1802850 | NP_002884 | L | S | LS | benign            |
| rs1802851 | NP_002884 | T | P | TP | probably damaging |
| rs1802866 | NP_848701 | M | I | MI | benign            |
| rs1802866 | NP_002710 | M | I | MI | benign            |
| rs1802866 | NP_848703 | M | I | MI | benign            |
| rs1802866 | NP_848702 | M | I | MI | possibly damaging |
| rs1802878 | NP_036475 | F | I | FI | probably damaging |
| rs1802878 | NP_892022 | F | I | FI | probably damaging |
| rs1802880 | NP_002302 | D | V | DV | probably damaging |
| rs1802880 | NP_039269 | D | V | DV | probably damaging |
| rs1802898 | NP_003472 | P | S | PS | possibly damaging |
| rs1802902 | NP_004573 | E | K | EK | benign            |

|           |           |   |   |    |                   |
|-----------|-----------|---|---|----|-------------------|
| rs1802903 | NP_004573 | G | V | GV | probably damaging |
| rs1802905 | NP_000268 | K | N | KN | probably damaging |
| rs1802915 | NP_006391 | K | N | KN | benign            |
| rs1802916 | NP_006391 | L | M | LM | benign            |
| rs1802925 | NP_001334 | A | V | AV | benign            |
| rs1802929 | NP_001055 | A | S | AS | benign            |
| rs1802932 | NP_665876 | I | V | IV | benign            |
| rs1802936 | NP_008993 | V | A | VA | possibly damaging |
| rs1802943 | NP_005919 | V | L | VL | benign            |
| rs1802952 | NP_004303 | G | V | GV | probably damaging |
| rs1802959 | NP_000286 | A | T | AT | probably damaging |
| rs1802962 | NP_000286 | S | C | SC | benign            |
| rs1802965 | NP_000005 | F | L | FL | probably damaging |
| rs1802969 | NP_002659 | A | S | AS | benign            |
| rs1802975 | NP_002894 | W | C | WC | probably damaging |
| rs1803012 | NP_002259 | E | G | EG | probably damaging |
| rs1803013 | NP_000995 | L | F | LF | possibly damaging |
| rs1803015 | NP_002806 | E | G | EG | probably damaging |
| rs1803018 | NP_002804 | G | V | GV | probably damaging |
| rs1803020 | NP_003695 | R | K | RK | benign            |
| rs1803025 | NP_853551 | D | E | DE | benign            |
| rs1803027 | NP_001604 | T | A | TA | benign            |
| rs1803028 | NP_001604 | T | S | TS | benign            |
| rs1803030 | NP_001093 | A | S | AS | benign            |
| rs1803048 | NP_001650 | I | V | IV | benign            |
| rs1803054 | NP_000680 | A | D | AD | possibly damaging |
| rs1803064 | NP_690601 | R | L | RL | possibly damaging |
| rs1803065 | NP_690601 | D | Y | DY | possibly damaging |
| rs1803082 | NP_000362 | T | I | TI | possibly damaging |
| rs1803083 | NP_000362 | P | S | PS | possibly damaging |
| rs1803084 | NP_000362 | H | Y | HY | probably damaging |
| rs1803086 | NP_000026 | A | T | AT | possibly damaging |
| rs1803088 | NP_000026 | L | V | LV | benign            |
| rs1803089 | NP_001634 | Y | F | YF | benign            |
| rs1803091 | NP_001634 | T | K | TK | possibly damaging |
| rs1803101 | NP_000471 | Q | K | QK | possibly damaging |
| rs1803116 | NP_003211 | A | V | AV | benign            |
| rs1803118 | NP_001632 | A | V | AV | benign            |
| rs1803118 | NP_542379 | A | V | AV | benign            |
| rs1803118 | NP_542380 | A | V | AV | benign            |
| rs1803120 | NP_001632 | P | S | PS | probably damaging |
| rs1803120 | NP_542379 | P | S | PS | probably damaging |
| rs1803120 | NP_542380 | P | S | PS | probably damaging |
| rs1803121 | NP_001633 | A | G | AG | possibly damaging |
| rs1803122 | NP_000033 | I | T | IT | benign            |
| rs1803124 | NP_000033 | L | M | LM | benign            |

|           |           |   |   |    |                   |
|-----------|-----------|---|---|----|-------------------|
| rs1803125 | NP_003141 | Q | K | QK | possibly damaging |
| rs1803125 | NP_998827 | Q | K | QK | possibly damaging |
| rs1803125 | NP_644805 | Q | K | QK | possibly damaging |
| rs1803127 | NP_004467 | Y | S | YS | possibly damaging |
| rs1803128 | NP_004467 | E | D | ED | benign            |
| rs1803150 | NP_001653 | L | W | LW | probably damaging |
| rs1803155 | NP_001077 | I | V | IV | benign            |
| rs1803163 | NP_001664 | P | H | PH | probably damaging |
| rs1803163 | NP_597680 | P | H | PH | probably damaging |
| rs1803163 | NP_899199 | P | H | PH | probably damaging |
| rs1803165 | NP_001340 | L | F | LF | benign            |
| rs1803169 | NP_002071 | T | I | TI | possibly damaging |
| rs1803177 | NP_005167 | M | K | MK | probably damaging |
| rs1803181 | NP_001676 | P | H | PH | probably damaging |
| rs1803183 | NP_005024 | I | V | IV | benign            |
| rs1803195 | NP_000509 | G | V | GV | benign            |
| rs1803198 | NP_000395 | T | K | TK | benign            |
| rs1803199 | NP_000395 | H | Y | HY | possibly damaging |
| rs1803203 | NP_940993 | G | V | GV | possibly damaging |
| rs1803203 | NP_940991 | G | V | GV | possibly damaging |
| rs1803203 | NP_940992 | G | V | GV | possibly damaging |
| rs1803204 | NP_001721 | T | K | TK | benign            |
| rs1803212 | NP_000053 | T | S | TS | benign            |
| rs1803224 | NP_000055 | M | I | MI | benign            |
| rs1803225 | NP_000055 | H | N | HN | possibly damaging |
| rs1803245 | NP_062427 | D | V | DV | possibly damaging |
| rs1803250 | NP_680090 | S | G | SG | benign            |
| rs1803250 | NP_680091 | S | G | SG | benign            |
| rs1803250 | NP_680092 | S | G | SG | benign            |
| rs1803250 | NP_680093 | S | G | SG | benign            |
| rs1803250 | NP_001899 | S | G | SG | benign            |
| rs1803261 | NP_976076 | K | N | KN | benign            |
| rs1803267 | NP_036277 | A | D | AD | possibly damaging |
| rs1803268 | NP_006163 | R | Q | RQ | possibly damaging |
| rs1803271 | NP_001272 | V | D | VD | probably damaging |
| rs1803274 | NP_000046 | A | T | AT | benign            |
| rs1803284 | NP_001814 | F | L | FL | probably damaging |
| rs1803285 | NP_001815 | V | M | VM | possibly damaging |
| rs1803289 | NP_001822 | D | Y | DY | possibly damaging |
| rs1803289 | NP_976084 | D | Y | DY | possibly damaging |
| rs1803291 | NP_004062 | H | Y | HY | probably damaging |
| rs1803299 | NP_001823 | G | V | GV | probably damaging |
| rs1803306 | NP_001701 | M | I | MI | benign            |
| rs1803307 | NP_003357 | R | T | RT | benign            |
| rs1803312 | NP_001852 | M | V | MV | possibly damaging |
| rs1803313 | NP_001852 | V | A | VA | possibly damaging |

|           |           |   |   |    |                   |
|-----------|-----------|---|---|----|-------------------|
| rs1803314 | NP_001852 | M | T | MT | probably damaging |
| rs1803318 | NP_004246 | L | H | LH | benign            |
| rs1803323 | NP_877962 | P | A | PA | benign            |
| rs1803324 | NP_877962 | E | D | ED | benign            |
| rs1803328 | NP_004069 | C | F | CF | probably damaging |
| rs1803342 | NP_598010 | L | P | LP | benign            |
| rs1803342 | NP_598012 | L | P | LP | possibly damaging |
| rs1803342 | NP_598013 | L | P | LP | possibly damaging |
| rs1803342 | NP_598011 | L | P | LP | probably damaging |
| rs1803344 | NP_598011 | E | Q | EQ | benign            |
| rs1803344 | NP_598012 | E | Q | EQ | benign            |
| rs1803344 | NP_598010 | E | Q | EQ | benign            |
| rs1803358 | NP_006826 | F | V | FV | possibly damaging |
| rs1803359 | NP_006826 | C | R | CR | probably damaging |
| rs1803361 | NP_000775 | V | A | VA | benign            |
| rs1803366 | NP_683725 | R | K | RK | possibly damaging |
| rs1803366 | NP_001905 | R | K | RK | possibly damaging |
| rs1803369 | NP_000756 | I | M | IM | benign            |
| rs1803369 | NP_059488 | M | I | MI | benign            |
| rs1803375 | NP_002790 | T | I | TI | possibly damaging |
| rs1803378 | NP_002790 | M | I | MI | probably damaging |
| rs1803381 | NP_002790 | G | W | GW | probably damaging |
| rs1803385 | NP_057356 | S | I | SI | possibly damaging |
| rs1803386 | NP_067675 | P | S | PS | benign            |
| rs1803403 | NP_002766 | G | C | GC | probably damaging |
| rs1803405 | NP_003303 | E | G | EG | probably damaging |
| rs1803411 | NP_002852 | D | Y | DY | probably damaging |
| rs1803415 | NP_848694 | C | F | CF | benign            |
| rs1803415 | NP_848693 | C | F | CF | benign            |
| rs1803432 | NP_002798 | K | M | KM | benign            |
| rs1803433 | NP_002798 | G | D | GD | benign            |
| rs1803438 | NP_004059 | I | F | IF | possibly damaging |
| rs1803444 | NP_005612 | K | N | KN | benign            |
| rs1803445 | NP_002615 | C | S | CS | benign            |
| rs1803445 | NP_665903 | C | S | CS | benign            |
| rs1803450 | NP_005597 | P | Q | PQ | possibly damaging |
| rs1803464 | NP_006635 | P | H | PH | possibly damaging |
| rs1803465 | NP_006635 | G | V | GV | benign            |
| rs1803480 | NP_001335 | S | F | SF | probably damaging |
| rs1803481 | NP_065438 | I | T | IT | possibly damaging |
| rs1803517 | NP_006277 | S | L | SL | possibly damaging |
| rs1803518 | NP_963849 | G | D | GD | possibly damaging |
| rs1803518 | NP_001441 | G | D | GD | possibly damaging |
| rs1803521 | NP_001378 | G | V | GV | benign            |
| rs1803524 | NP_005746 | A | V | AV | benign            |
| rs1803542 | NP_000114 | F | L | FL | benign            |

|           |           |   |   |    |                   |
|-----------|-----------|---|---|----|-------------------|
| rs1803557 | NP_005230 | E | V | EV | probably damaging |
| rs1803563 | NP_001434 | V | L | VL | benign            |
| rs1803566 | NP_000029 | E | D | ED | benign            |
| rs1803569 | NP_000794 | C | F | CF | probably damaging |
| rs1803571 | NP_003245 | I | V | IV | benign            |
| rs1803573 | NP_004102 | E | D | ED | benign            |
| rs1803578 | NP_000137 | H | Y | HY | possibly damaging |
| rs1803580 | NP_000137 | L | F | LF | benign            |
| rs1803595 | NP_004468 | R | K | RK | benign            |
| rs1803597 | NP_002018 | Y | N | YN | probably damaging |
| rs1803614 | NP_002036 | A | S | AS | benign            |
| rs1803619 | NP_002037 | D | Y | DY | possibly damaging |
| rs1803625 | NP_002037 | T | I | TI | benign            |
| rs1803630 | NP_002044 | L | S | LS | possibly damaging |
| rs1803633 | NP_004478 | Q | R | QR | benign            |
| rs1803636 | NP_002052 | A | E | AE | benign            |
| rs1803650 | NP_002769 | K | N | KN | possibly damaging |
| rs1803672 | NP_077318 | E | Q | EQ | benign            |
| rs1803681 | NP_000837 | Q | H | QH | benign            |
| rs1803681 | NP_665683 | Q | H | QH | benign            |
| rs1803682 | NP_000837 | K | N | KN | benign            |
| rs1803687 | NP_000840 | K | N | KN | possibly damaging |
| rs1803691 | NP_004475 | M | I | MI | benign            |
| rs1803692 | NP_004475 | V | L | VL | benign            |
| rs1803693 | NP_001061 | T | I | TI | probably damaging |
| rs1803701 | NP_004893 | V | A | VA | benign            |
| rs1803701 | NP_909132 | V | A | VA | benign            |
| rs1803701 | NP_909129 | V | A | VA | benign            |
| rs1803711 | NP_006394 | H | Y | HY | possibly damaging |
| rs1803737 | NP_001672 | V | A | VA | possibly damaging |
| rs1803737 | NP_733765 | V | A | VA | possibly damaging |
| rs1803745 | NP_006830 | R | I | RI | probably damaging |
| rs1803751 | NP_005134 | G | R | GR | probably damaging |
| rs1803752 | NP_006801 | H | L | HL | probably damaging |
| rs1803758 | NP_002757 | M | I | MI | probably damaging |
| rs1803775 | XP_034640 | S | I | SI | possibly damaging |
| rs1803781 | NP_006114 | D | N | DN | benign            |
| rs1803781 | NP_000193 | D | N | DN | benign            |
| rs1803782 | NP_006114 | S | R | SR | possibly damaging |
| rs1803782 | NP_000193 | S | R | SR | possibly damaging |
| rs1803783 | NP_000193 | P | H | PH | probably damaging |
| rs1803785 | NP_000193 | F | Y | FY | benign            |
| rs1803791 | NP_998811 | G | V | GV | probably damaging |
| rs1803830 | NP_788955 | S | N | SN | benign            |
| rs1803830 | NP_006254 | S | N | SN | possibly damaging |
| rs1803838 | NP_644671 | P | L | PL | possibly damaging |

|           |           |   |   |    |                   |
|-----------|-----------|---|---|----|-------------------|
| rs1803843 | NP_005183 | S | F | SF | benign            |
| rs1803854 | NP_739580 | N | I | NI | probably damaging |
| rs1803855 | NP_055481 | G | C | GC | benign            |
| rs1803856 | NP_055481 | E | K | EK | benign            |
| rs1803864 | NP_005095 | V | A | VA | possibly damaging |
| rs1803878 | NP_003394 | D | E | DE | benign            |
| rs1803909 | NP_004030 | Y | H | YH | possibly damaging |
| rs1803916 | NP_000886 | T | S | TS | benign            |
| rs1803922 | NP_000099 | N | T | NT | benign            |
| rs1803928 | NP_002330 | Q | K | QK | benign            |
| rs1803936 | NP_002345 | L | S | LS | benign            |
| rs1803937 | NP_001544 | A | V | AV | benign            |
| rs1803939 | NP_065390 | F | S | FS | possibly damaging |
| rs1803941 | NP_067544 | V | L | VL | benign            |
| rs1803941 | NP_000823 | V | L | VL | benign            |
| rs1803941 | NP_015566 | V | L | VL | benign            |
| rs1803943 | NP_002719 | K | R | KR | benign            |
| rs1803947 | NP_001738 | K | I | KI | possibly damaging |
| rs1803950 | NP_005947 | P | L | PL | benign            |
| rs1803951 | NP_005947 | G | C | GC | probably damaging |
| rs1803966 | NP_000891 | R | G | RG | possibly damaging |
| rs1803971 | NP_004346 | P | S | PS | possibly damaging |
| rs1803975 | NP_002405 | L | V | LV | benign            |
| rs1803976 | NP_002406 | N | S | NS | possibly damaging |
| rs1803986 | NP_000231 | M | I | MI | probably damaging |
| rs1803990 | NP_002794 | S | N | SN | benign            |
| rs1803998 | NP_569157 | S | R | SR | possibly damaging |
| rs1803998 | NP_005953 | S | R | SR | possibly damaging |
| rs1804000 | NP_066299 | Y | H | YH | probably damaging |
| rs1804000 | NP_524148 | Y | H | YH | probably damaging |
| rs1804000 | NP_524147 | Y | H | YH | probably damaging |
| rs1804002 | NP_000704 | K | T | KT | benign            |
| rs1804006 | NP_000092 | T | A | TA | benign            |
| rs1804007 | NP_000092 | F | S | FS | probably damaging |
| rs1804014 | NP_005800 | A | S | AS | benign            |
| rs1804014 | NP_859428 | A | S | AS | benign            |
| rs1804020 | NP_055312 | V | M | VM | benign            |
| rs1804021 | NP_002510 | V | I | VI | benign            |
| rs1804027 | NP_004501 | M | T | MT | benign            |
| rs1804027 | NP_536349 | M | T | MT | benign            |
| rs1804027 | NP_004500 | M | T | MT | benign            |
| rs1804030 | NP_000265 | R | C | RC | probably damaging |
| rs1804034 | NP_996800 | D | V | DV | possibly damaging |
| rs1804037 | NP_996800 | G | S | GS | possibly damaging |
| rs1804040 | NP_001771 | G | R | GR | probably damaging |
| rs1804041 | NP_001771 | I | T | IT | possibly damaging |

|           |           |   |   |    |                   |
|-----------|-----------|---|---|----|-------------------|
| rs1804042 | NP_056937 | Q | R | QR | benign            |
| rs1804046 | NP_004913 | Q | E | QE | possibly damaging |
| rs1804046 | NP_940999 | Q | E | QE | possibly damaging |
| rs1804054 | NP_004896 | P | T | PT | possibly damaging |
| rs1804059 | NP_003730 | M | I | MI | probably damaging |
| rs1804069 | NP_005207 | S | Y | SY | benign            |
| rs1804079 | NP_055555 | R | G | RG | probably damaging |
| rs1804086 | NP_055579 | T | A | TA | benign            |
| rs1804099 | NP_877577 | A | V | AV | benign            |
| rs1804106 | NP_005733 | R | L | RL | probably damaging |
| rs1804109 | NP_009005 | R | K | RK | benign            |
| rs1804110 | XP_291111 | A | D | AD | possibly damaging |
| rs1804113 | NP_002453 | V | I | VI | benign            |
| rs1804115 | NP_955369 | V | A | VA | benign            |
| rs1804117 | NP_000362 | K | E | KE | possibly damaging |
| rs1804118 | NP_000362 | T | N | TN | benign            |
| rs1804119 | NP_620121 | D | E | DE | benign            |
| rs1804119 | NP_620176 | D | E | DE | benign            |
| rs1804119 | NP_620177 | D | E | DE | benign            |
| rs1804119 | NP_000910 | D | E | DE | benign            |
| rs1804145 | NP_002606 | P | H | PH | benign            |
| rs1804148 | NP_002606 | T | I | TI | benign            |
| rs1804160 | NP_002582 | V | I | VI | benign            |
| rs1804161 | NP_006218 | F | L | FL | benign            |
| rs1804161 | NP_872617 | F | L | FL | probably damaging |
| rs1804173 | NP_006215 | E | K | EK | benign            |
| rs1804176 | NP_000287 | G | R | GR | probably damaging |
| rs1804180 | NP_002656 | R | K | RK | benign            |
| rs1804181 | NP_000292 | K | I | KI | probably damaging |
| rs1804189 | NP_008859 | A | V | AV | benign            |
| rs1804194 | NP_001673 | S | N | SN | benign            |
| rs1804200 | NP_006234 | Y | H | YH | probably damaging |
| rs1804202 | NP_006519 | V | A | VA | benign            |
| rs1804206 | XP_496612 | K | E | KE | benign            |
| rs1804209 | XP_496612 | A | V | AV | benign            |
| rs1804211 | NP_005579 | T | M | TM | benign            |
| rs1804212 | NP_000299 | H | Q | HQ | possibly damaging |
| rs1804215 | NP_937878 | R | L | RL | probably damaging |
| rs1804219 | NP_005013 | D | Y | DY | probably damaging |
| rs1804235 | NP_002786 | L | M | LM | benign            |
| rs1804236 | NP_002785 | L | F | LF | benign            |
| rs1804237 | NP_002785 | G | V | GV | probably damaging |
| rs1804241 | NP_002787 | M | I | MI | benign            |
| rs1804254 | NP_002618 | Q | K | QK | benign            |
| rs1804263 | NP_006285 | L | P | LP | possibly damaging |
| rs1804267 | NP_061485 | K | R | KR | benign            |

|           |           |   |   |    |                   |
|-----------|-----------|---|---|----|-------------------|
| rs1804267 | NP_942126 | K | R | KR | benign            |
| rs1804270 | NP_002872 | R | C | RC | probably damaging |
| rs1804275 | NP_000291 | D | Y | DY | probably damaging |
| rs1804281 | NP_002892 | D | Y | DY | probably damaging |
| rs1804283 | NP_002895 | G | V | GV | probably damaging |
| rs1804292 | NP_786886 | K | N | KN | probably damaging |
| rs1804295 | NP_000966 | L | S | LS | probably damaging |
| rs1804296 | NP_000966 | Y | C | YC | benign            |
| rs1804297 | NP_000966 | F | I | FI | probably damaging |
| rs1804298 | NP_000966 | E | G | EG | probably damaging |
| rs1804301 | NP_000966 | A | V | AV | possibly damaging |
| rs1804302 | NP_000966 | L | P | LP | probably damaging |
| rs1804303 | NP_000966 | I | T | IT | possibly damaging |
| rs1804308 | NP_000980 | M | T | MT | benign            |
| rs1804313 | NP_000980 | K | M | KM | probably damaging |
| rs1804314 | NP_000980 | S | T | ST | benign            |
| rs1804323 | XP_171447 | D | E | DE | benign            |
| rs1804324 | NP_001617 | Y | N | YN | probably damaging |
| rs1804325 | NP_000970 | Q | L | QL | possibly damaging |
| rs1804326 | NP_000970 | R | H | RH | benign            |
| rs1804330 | NP_000977 | Y | H | YH | probably damaging |
| rs1804331 | NP_000977 | A | D | AD | probably damaging |
| rs1804336 | NP_000989 | K | E | KE | possibly damaging |
| rs1804342 | NP_000989 | K | N | KN | possibly damaging |
| rs1804357 | XP_377716 | V | A | VA | benign            |
| rs1804358 | XP_377716 | L | S | LS | probably damaging |
| rs1804360 | NP_001012 | L | P | LP | probably damaging |
| rs1804368 | NP_001014 | D | G | DG | probably damaging |
| rs1804387 | NP_780294 | L | F | LF | benign            |
| rs1804394 | NP_000998 | I | T | IT | possibly damaging |
| rs1804401 | NP_000992 | L | F | LF | possibly damaging |
| rs1804427 | NP_000933 | V | A | VA | possibly damaging |
| rs1804450 | NP_000445 | T | I | TI | benign            |
| rs1804460 | NP_002961 | L | F | LF | benign            |
| rs1804461 | NP_002434 | D | G | DG | possibly damaging |
| rs1804464 | NP_002434 | V | L | VL | benign            |
| rs1804465 | NP_002434 | V | F | VF | benign            |
| rs1804466 | NP_002434 | C | R | CR | probably damaging |
| rs1804468 | NP_002434 | Q | R | QR | benign            |
| rs1804469 | NP_002434 | E | G | EG | probably damaging |
| rs1804471 | NP_003119 | D | Y | DY | probably damaging |
| rs1804471 | NP_842565 | D | Y | DY | probably damaging |
| rs1804473 | NP_004453 | L | P | LP | possibly damaging |
| rs1804475 | XP_497482 | P | L | PL | possibly damaging |
| rs1804486 | NP_938075 | K | M | KM | possibly damaging |
| rs1804486 | NP_938074 | K | M | KM | possibly damaging |



|           |           |   |   |    |                   |
|-----------|-----------|---|---|----|-------------------|
| rs1804486 | NP_001527 | K | M | KM | possibly damaging |
| rs1804488 | NP_058132 | P | S | PS | benign            |
| rs1804488 | NP_002525 | P | S | PS | benign            |
| rs1804492 | NP_004606 | T | M | TM | benign            |
| rs1804495 | NP_000345 | L | F | LF | benign            |
| rs1804498 | NP_001054 | W | C | WC | probably damaging |
| rs1804499 | NP_001505 | P | S | PS | probably damaging |
| rs1804504 | NP_000618 | C | F | CF | probably damaging |
| rs1804504 | NP_996826 | C | F | CF | probably damaging |
| rs1804508 | NP_000011 | I | N | IN | probably damaging |
| rs1804509 | NP_000011 | L | F | LF | benign            |
| rs1804513 | NP_689508 | A | S | AS | benign            |
| rs1804529 | NP_005068 | A | V | AV | possibly damaging |
| rs1804530 | NP_005068 | D | Y | DY | probably damaging |
| rs1804532 | NP_001056 | P | T | PT | benign            |
| rs1804534 | NP_002333 | Q | R | QR | benign            |
| rs1804535 | NP_005740 | A | S | AS | benign            |
| rs1804538 | NP_001058 | P | S | PS | possibly damaging |
| rs1804539 | NP_001058 | S | F | SF | possibly damaging |
| rs1804542 | XP_371261 | V | M | VM | benign            |
| rs1804546 | NP_003282 | K | R | KR | benign            |
| rs1804548 | NP_003270 | M | I | MI | probably damaging |
| rs1804558 | NP_998839 | K | N | KN | probably damaging |
| rs1804558 | NP_003280 | K | N | KN | probably damaging |
| rs1804563 | NP_002761 | S | F | SF | probably damaging |
| rs1804572 | NP_036457 | K | Q | KQ | possibly damaging |
| rs1804579 | NP_003063 | V | E | VE | possibly damaging |
| rs1804580 | NP_003063 | D | H | DH | possibly damaging |
| rs1804584 | NP_003737 | K | N | KN | benign            |
| rs1804586 | NP_543012 | H | Y | HY | benign            |
| rs1804598 | NP_006803 | R | W | RW | probably damaging |
| rs1804600 | NP_036380 | P | A | PA | possibly damaging |
| rs1804604 | NP_853549 | Q | R | QR | benign            |
| rs1804604 | NP_874386 | Q | R | QR | benign            |
| rs1804604 | NP_874387 | Q | R | QR | benign            |
| rs1804604 | NP_874389 | Q | R | QR | benign            |
| rs1804604 | NP_874390 | Q | R | QR | benign            |
| rs1804604 | NP_874392 | Q | R | QR | benign            |
| rs1804604 | NP_874393 | Q | R | QR | benign            |
| rs1804604 | NP_877571 | Q | R | QR | benign            |
| rs1804604 | NP_877573 | Q | R | QR | benign            |
| rs1804604 | NP_898830 | Q | R | QR | benign            |
| rs1804604 | NP_898831 | Q | R | QR | benign            |
| rs1804604 | NP_898883 | Q | R | QR | benign            |
| rs1804604 | NP_878273 | Q | R | QR | benign            |
| rs1804604 | NP_874388 | Q | R | QR | possibly damaging |

|           |           |   |   |    |                   |
|-----------|-----------|---|---|----|-------------------|
| rs1804604 | NP_877572 | Q | R | QR | possibly damaging |
| rs1804604 | NP_898829 | Q | R | QR | possibly damaging |
| rs1804604 | NP_878270 | Q | R | QR | possibly damaging |
| rs1804609 | NP_005906 | P | T | PT | probably damaging |
| rs1804613 | NP_005956 | W | R | WR | probably damaging |
| rs1804613 | NP_444254 | W | R | WR | probably damaging |
| rs1804613 | NP_444255 | W | R | WR | probably damaging |
| rs1804613 | NP_444256 | W | R | WR | probably damaging |
| rs1804613 | NP_444260 | W | R | WR | probably damaging |
| rs1804613 | NP_444259 | W | R | WR | probably damaging |
| rs1804613 | NP_444253 | W | R | WR | probably damaging |
| rs1804616 | NP_004810 | V | L | VL | benign            |
| rs1804618 | NP_892116 | I | K | IK | probably damaging |
| rs1804625 | NP_001670 | S | Y | SY | possibly damaging |
| rs1804642 | NP_005635 | M | I | MI | probably damaging |
| rs1804645 | NP_003734 | P | S | PS | probably damaging |
| rs1804645 | NP_671756 | P | S | PS | probably damaging |
| rs1804645 | NP_671766 | P | S | PS | probably damaging |
| rs1804647 | NP_005891 | K | E | KE | possibly damaging |
| rs1804650 | NP_116758 | E | K | EK | benign            |
| rs1804650 | NP_001221 | E | K | EK | benign            |
| rs1804650 | NP_116759 | E | K | EK | benign            |
| rs1804650 | NP_116756 | E | K | EK | benign            |
| rs1804651 | NP_036400 | F | V | FV | possibly damaging |
| rs1804652 | NP_036400 | G | A | GA | possibly damaging |
| rs1804671 | NP_036515 | S | P | SP | probably damaging |
| rs1804675 | NP_005650 | G | W | GW | benign            |
| rs1804677 | NP_997005 | P | S | PS | possibly damaging |
| rs1804694 | NP_006828 | A | S | AS | benign            |
| rs1804696 | NP_004416 | Q | H | QH | benign            |
| rs1804696 | NP_073155 | Q | H | QH | benign            |
| rs1804702 | NP_689452 | S | Y | SY | probably damaging |
| rs1804709 | NP_000353 | D | Y | DY | probably damaging |
| rs1804711 | NP_009214 | R | Q | RQ | benign            |
| rs1804715 | NP_006109 | S | P | SP | benign            |
| rs1804718 | NP_005188 | D | E | DE | benign            |
| rs1804722 | NP_694858 | S | F | SF | benign            |
| rs1804728 | NP_004219 | V | F | VF | possibly damaging |
| rs1804728 | NP_059431 | V | F | VF | possibly damaging |
| rs1804729 | NP_006825 | K | N | KN | possibly damaging |
| rs1804731 | NP_004146 | N | D | ND | possibly damaging |
| rs1804732 | NP_976036 | H | Y | HY | possibly damaging |
| rs1804732 | NP_976037 | H | Y | HY | possibly damaging |
| rs1804732 | NP_002885 | H | Y | HY | possibly damaging |
| rs1804740 | NP_002262 | Y | C | YC | probably damaging |
| rs1804741 | NP_002262 | T | I | TI | possibly damaging |

|           |           |   |   |    |                   |
|-----------|-----------|---|---|----|-------------------|
| rs1804745 | NP_006822 | R | M | RM | probably damaging |
| rs1804747 | NP_005209 | H | R | HR | benign            |
| rs1804749 | NP_002862 | A | T | AT | benign            |
| rs1804755 | NP_085911 | P | S | PS | benign            |
| rs1804758 | NP_001175 | C | Y | CY | probably damaging |
| rs1804759 | NP_003037 | M | L | ML | benign            |
| rs1804762 | NP_006566 | N | K | NK | probably damaging |
| rs1804762 | NP_942089 | N | K | NK | probably damaging |
| rs1804770 | NP_066925 | C | F | CF | probably damaging |
| rs1804776 | NP_002434 | L | S | LS | possibly damaging |
| rs1804778 | NP_002434 | I | M | IM | benign            |
| rs1804780 | NP_002434 | W | R | WR | probably damaging |
| rs1804783 | NP_000059 | G | V | GV | probably damaging |
| rs1804785 | NP_001089 | A | S | AS | benign            |
| rs1804795 | NP_006283 | R | G | RG | probably damaging |
| rs1804797 | NP_002405 | N | T | NT | benign            |
| rs1804798 | NP_006375 | D | G | DG | possibly damaging |
| rs1804806 | NP_003643 | F | L | FL | possibly damaging |
| rs1804807 | NP_003643 | S | C | SC | benign            |
| rs1804811 | NP_751949 | P | H | PH | probably damaging |
| rs1804811 | NP_001616 | P | H | PH | probably damaging |
| rs1804811 | NP_037543 | P | H | PH | probably damaging |
| rs1804813 | NP_001616 | A | V | AV | benign            |
| rs1804813 | NP_037543 | A | V | AV | benign            |
| rs1804823 | NP_004415 | S | T | ST | benign            |
| rs1804833 | NP_002309 | V | L | VL | benign            |
| rs1804853 | NP_002537 | L | F | LF | benign            |
| rs1804860 | NP_005921 | P | S | PS | possibly damaging |
| rs1804860 | NP_976229 | P | S | PS | possibly damaging |
| rs1804860 | NP_976232 | P | S | PS | possibly damaging |
| rs1804860 | NP_976230 | P | S | PS | probably damaging |
| rs1804860 | NP_976231 | P | S | PS | probably damaging |
| rs1804865 | NP_004228 | V | F | VF | benign            |
| rs1804867 | NP_005861 | P | L | PL | probably damaging |
| rs1804868 | NP_005861 | P | T | PT | possibly damaging |
| rs1804886 | NP_000365 | F | L | FL | possibly damaging |
| rs1804887 | NP_004222 | I | T | IT | possibly damaging |
| rs1804889 | NP_004222 | A | P | AP | benign            |
| rs1804899 | NP_001176 | D | E | DE | benign            |
| rs1804905 | NP_009086 | R | T | RT | benign            |
| rs1804913 | XP_498351 | P | T | PT | possibly damaging |
| rs1804919 | NP_060517 | G | V | GV | possibly damaging |
| rs1804920 | NP_060517 | E | D | ED | benign            |
| rs1804924 | NP_003744 | P | S | PS | probably damaging |
| rs1804928 | NP_003747 | P | Q | PQ | possibly damaging |
| rs1804931 | NP_002367 | G | V | GV | possibly damaging |

|           |           |   |   |    |                   |
|-----------|-----------|---|---|----|-------------------|
| rs1804932 | NP_001295 | A | S | AS | benign            |
| rs1804941 | NP_998787 | V | L | VL | benign            |
| rs1804957 | NP_005885 | E | D | ED | benign            |
| rs1804963 | NP_006586 | E | Q | EQ | benign            |
| rs1804965 | NP_003255 | E | D | ED | benign            |
| rs1804994 | NP_056525 | R | Q | RQ | benign            |
| rs1805000 | NP_795344 | L | F | LF | benign            |
| rs1805001 | NP_795344 | R | Q | RQ | benign            |
| rs1805002 | NP_795344 | V | I | VI | benign            |
| rs1805005 | NP_002377 | V | L | VL | possibly damaging |
| rs1805006 | NP_002377 | D | E | DE | possibly damaging |
| rs1805007 | NP_002377 | R | C | RC | probably damaging |
| rs1805008 | NP_002377 | R | W | RW | benign            |
| rs1805009 | NP_002377 | D | H | DH | probably damaging |
| rs1805010 | NP_000409 | I | L | IL | benign            |
| rs1805011 | NP_000409 | E | A | EA | benign            |
| rs1805012 | NP_000409 | C | R | CR | benign            |
| rs1805013 | NP_000409 | S | L | SL | benign            |
| rs1805014 | NP_000409 | S | P | SP | possibly damaging |
| rs1805015 | NP_000409 | S | P | SP | benign            |
| rs1805016 | NP_000409 | S | A | SA | benign            |
| rs1805017 | NP_005075 | R | H | RH | benign            |
| rs1805018 | NP_005075 | I | T | IT | benign            |
| rs1805031 | NP_000717 | C | F | CF | probably damaging |
| rs1805034 | NP_003830 | A | V | AV | benign            |
| rs1805035 | NP_000449 | G | S | GS | benign            |
| rs1805038 | NP_000625 | R | C | RC | benign            |
| rs1805040 | NP_000887 | D | A | DA | benign            |
| rs1805044 | NP_000288 | R | P | RP | possibly damaging |
| rs1805048 | NP_009054 | D | V | DV | benign            |
| rs1805049 | NP_009054 | R | K | RK | benign            |
| rs1805055 | NP_000612 | T | N | TN | benign            |
| rs1805057 | NP_068703 | G | S | GS | benign            |
| rs1805057 | NP_068704 | G | S | GS | benign            |
| rs1805057 | NP_001461 | G | S | GS | benign            |
| rs1805057 | NP_068705 | S | G | SG | benign            |
| rs1805063 | NP_076872 | R | W | RW | possibly damaging |
| rs1805064 | NP_001034 | V | I | VI | benign            |
| rs1805065 | NP_001034 | T | I | TI | possibly damaging |
| rs1805066 | NP_001034 | V | I | VI | benign            |
| rs1805067 | NP_001034 | G | S | GS | benign            |
| rs1805069 | NP_005996 | G | S | GS | benign            |
| rs1805070 | NP_005996 | I | V | IV | benign            |
| rs1805073 | NP_037523 | A | G | AG | benign            |
| rs1805074 | NP_037523 | S | P | SP | benign            |
| rs1805075 | NP_000867 | N | S | NS | benign            |

|           |           |   |   |    |                   |
|-----------|-----------|---|---|----|-------------------|
| rs1805076 | NP_002707 | G | D | GD | benign            |
| rs1805076 | NP_859050 | G | D | GD | benign            |
| rs1805077 | NP_002569 | S | R | SR | benign            |
| rs1805078 | NP_000144 | R | C | RC | possibly damaging |
| rs1805081 | NP_000262 | H | R | HR | benign            |
| rs1805082 | NP_000262 | I | V | IV | benign            |
| rs1805084 | NP_000262 | R | Q | RQ | benign            |
| rs1805085 | NP_005250 | A | T | AT | benign            |
| rs1805086 | NP_005250 | K | R | KR | benign            |
| rs1805087 | NP_000245 | D | G | DG | benign            |
| rs1805089 | NP_004985 | E | K | EK | benign            |
| rs1805090 | NP_000020 | L | M | LM | benign            |
| rs1805097 | NP_003740 | G | D | GD | benign            |
| rs1805098 | NP_004124 | M | I | MI | possibly damaging |
| rs1805101 | NP_006199 | K | Q | KQ | benign            |
| rs1805123 | NP_742054 | K | T | KT | possibly damaging |
| rs1805123 | NP_000229 | K | T | KT | possibly damaging |
| rs1805124 | NP_932173 | H | R | HR | benign            |
| rs1805124 | NP_000326 | H | R | HR | possibly damaging |
| rs1805125 | NP_000326 | P | L | PL | possibly damaging |
| rs1805125 | NP_932173 | P | L | PL | probably damaging |
| rs1805127 | NP_000210 | G | S | GS | benign            |
| rs1805128 | NP_000210 | D | N | DN | benign            |
| rs1805133 | NP_848514 | D | N | DN | benign            |
| rs1805133 | NP_001659 | D | N | DN | benign            |
| rs1805138 | NP_006199 | T | P | TP | benign            |
| rs1805139 | NP_006199 | Y | H | YH | possibly damaging |
| rs1805142 | NP_004174 | E | Q | EQ | benign            |
| rs1805143 | NP_004174 | P | S | PS | probably damaging |
| rs1805144 | NP_004174 | E | D | ED | benign            |
| rs1805147 | NP_008846 | R | W | RW | possibly damaging |
| rs1805148 | NP_008846 | D | Y | DY | probably damaging |
| rs1805149 | NP_002518 | G | E | GE | possibly damaging |
| rs1805152 | NP_004061 | A | T | AT | benign            |
| rs1805158 | NP_000006 | R | W | RW | benign            |
| rs1805161 | NP_000113 | K | R | KR | benign            |
| rs1805162 | NP_000113 | G | C | GC | possibly damaging |
| rs1805192 | NP_619726 | P | A | PA | possibly damaging |
| rs1805274 | NP_066271 | A | T | AT | benign            |
| rs1805274 | NP_072170 | A | T | AT | benign            |
| rs1805274 | NP_072171 | A | T | AT | benign            |
| rs1805274 | NP_072167 | P | T | PT | benign            |
| rs1805274 | NP_001308 | P | T | PT | benign            |
| rs1805274 | NP_072166 | P | T | PT | possibly damaging |
| rs1805318 | NP_000526 | T | S | TS | benign            |
| rs1805321 | NP_000526 | P | S | PS | benign            |

|           |           |   |   |    |                   |
|-----------|-----------|---|---|----|-------------------|
| rs1805322 | NP_000526 | T | K | TK | benign            |
| rs1805323 | NP_000526 | T | K | TK | benign            |
| rs1805324 | NP_000526 | M | I | MI | benign            |
| rs1805327 | NP_596868 | E | G | EG | possibly damaging |
| rs1805328 | NP_596868 | T | S | TS | benign            |
| rs1805329 | NP_002865 | A | V | AV | benign            |
| rs1805362 | NP_005581 | M | V | MV | benign            |
| rs1805362 | NP_005582 | M | V | MV | possibly damaging |
| rs1805367 | NP_005581 | D | G | DG | possibly damaging |
| rs1805367 | NP_005582 | D | G | DG | probably damaging |
| rs1805373 | NP_058212 | R | Q | RQ | benign            |
| rs1805373 | NP_058213 | R | Q | RQ | benign            |
| rs1805373 | NP_058214 | R | Q | RQ | benign            |
| rs1805373 | NP_058434 | R | Q | RQ | benign            |
| rs1805373 | NP_058437 | R | Q | RQ | benign            |
| rs1805373 | NP_058438 | R | Q | RQ | benign            |
| rs1805373 | NP_002533 | R | Q | RQ | benign            |
| rs1805378 | NP_002519 | I | T | IT | possibly damaging |
| rs1805380 | NP_066964 | L | F | LF | benign            |
| rs1805388 | NP_996820 | T | I | TI | possibly damaging |
| rs1805389 | NP_996820 | A | V | AV | benign            |
| rs1805409 | NP_001609 | A | T | AT | benign            |
| rs1805749 | NP_005801 | W | R | WR | possibly damaging |
| rs1805794 | NP_002476 | E | Q | EQ | benign            |
| rs1806079 | NP_003957 | V | L | VL | benign            |
| rs1806229 | NP_002523 | T | I | TI | benign            |
| rs1806230 | NP_002523 | T | I | TI | possibly damaging |
| rs1806245 | NP_002523 | N | S | NS | benign            |
| rs1806268 | NP_002523 | G | S | GS | benign            |
| rs1806304 | XP_498024 | E | D | ED | benign            |
| rs1806552 | XP_496849 | Q | R | QR | benign            |
| rs1806931 | NP_039227 | S | F | SF | possibly damaging |
| rs1807124 | NP_003821 | M | V | MV | benign            |
| rs1807128 | NP_945349 | H | R | HR | benign            |
| rs1807129 | NP_945349 | R | H | RH | possibly damaging |
| rs1807284 | NP_872429 | P | L | PL | possibly damaging |
| rs1807467 | NP_057419 | A | S | AS | benign            |
| rs1807493 | XP_086826 | A | G | AG | benign            |
| rs1807747 | XP_372543 | H | R | HR | benign            |
| rs1808125 | XP_496634 | H | R | HR | benign            |
| rs1808140 | NP_079066 | R | W | RW | benign            |
| rs1808998 | NP_055626 | M | T | MT | benign            |
| rs1809270 | XP_498109 | L | F | LF | benign            |
| rs1809271 | XP_498109 | V | D | VD | probably damaging |
| rs1809279 | NP_006301 | G | D | GD | possibly damaging |
| rs1809767 | NP_775884 | L | F | LF | benign            |

|           |           |   |   |    |                   |
|-----------|-----------|---|---|----|-------------------|
| rs1809810 | NP_000753 | F | Y | FY | benign            |
| rs1810660 | XP_033370 | Q | E | QE | benign            |
| rs1810856 | NP_037447 | R | Q | RQ | benign            |
| rs1810856 | NP_954869 | R | Q | RQ | benign            |
| rs1810856 | NP_954870 | R | Q | RQ | benign            |
| rs1810951 | XP_372191 | R | W | RW | probably damaging |
| rs1810952 | XP_372191 | K | M | KM | possibly damaging |
| rs1810954 | XP_372191 | T | I | TI | benign            |
| rs1810998 | XP_057040 | N | D | ND | benign            |
| rs1811082 | NP_072170 | A | T | AT | benign            |
| rs1811083 | NP_072166 | L | P | LP | possibly damaging |
| rs1811097 | NP_061978 | T | S | TS | benign            |
| rs1811236 | NP_061763 | V | L | VL | benign            |
| rs1811237 | NP_061763 | V | L | VL | benign            |
| rs1811238 | NP_061763 | Q | H | QH | benign            |
| rs1811659 | XP_047995 | N | Y | NY | probably damaging |
| rs1812061 | NP_005144 | L | V | LV | benign            |
| rs1812152 | NP_872431 | T | S | TS | benign            |
| rs1812240 | NP_056518 | V | I | VI | benign            |
| rs1812242 | XP_372760 | M | T | MT | possibly damaging |
| rs1812749 | XP_371306 | I | V | IV | benign            |
| rs1812805 | XP_293923 | V | L | VL | benign            |
| rs1813078 | XP_061890 | R | S | RS | benign            |
| rs1813078 | XP_495891 | S | R | SR | benign            |
| rs1813160 | NP_005782 | E | D | ED | benign            |
| rs1814670 | XP_171032 | G | R | GR | probably damaging |
| rs1814793 | XP_497046 | A | V | AV | benign            |
| rs1815059 | NP_060734 | E | K | EK | benign            |
| rs1815061 | NP_060734 | H | Q | HQ | benign            |
| rs1815376 | XP_171032 | T | R | TR | possibly damaging |
| rs1815633 | XP_497652 | R | S | RS | possibly damaging |
| rs1815811 | NP_079067 | Q | R | QR | benign            |
| rs1815930 | XP_371116 | T | A | TA | benign            |
| rs1816416 | XP_371145 | R | C | RC | probably damaging |
| rs1816774 | XP_291974 | D | Y | DY | probably damaging |
| rs1817206 | XP_377159 | G | E | GE | possibly damaging |
| rs1817988 | XP_371243 | M | T | MT | probably damaging |
| rs1818989 | NP_612143 | S | L | SL | possibly damaging |
| rs1818990 | NP_612143 | K | R | KR | benign            |
| rs1819505 | XP_496691 | Q | R | QR | possibly damaging |
| rs1820128 | NP_940859 | R | C | RC | probably damaging |
| rs1820204 | NP_127463 | F | L | FL | benign            |
| rs1820204 | NP_001220 | F | L | FL | benign            |
| rs1820965 | NP_005671 | E | D | ED | benign            |
| rs1823751 | XP_496026 | N | I | NI | possibly damaging |
| rs1824152 | NP_056507 | H | R | HR | benign            |

|           |           |   |   |    |                   |
|-----------|-----------|---|---|----|-------------------|
| rs1824302 | NP_002244 | R | K | RK | benign            |
| rs1826330 | XP_084514 | T | A | TA | benign            |
| rs1827225 | XP_497613 | I | V | IV | benign            |
| rs1827293 | NP_115640 | Y | C | YC | probably damaging |
| rs1827786 | XP_496691 | A | T | AT | benign            |
| rs1828032 | XP_496692 | H | Q | HQ | benign            |
| rs1829951 | XP_208060 | F | L | FL | possibly damaging |
| rs1830035 | NP_699194 | Y | H | YH | benign            |
| rs1830036 | NP_699194 | C | S | CS | benign            |
| rs1830080 | NP_066971 | G | E | GE | benign            |
| rs1831061 | XP_092019 | R | K | RK | benign            |
| rs1831240 | NP_443173 | I | V | IV | benign            |
| rs1831370 | XP_071151 | W | R | WR | benign            |
| rs1831377 | XP_115100 | T | A | TA | benign            |
| rs1832269 | NP_000690 | R | G | RG | probably damaging |
| rs1832723 | XP_498326 | N | K | NK | benign            |
| rs1832723 | XP_498328 | N | K | NK | benign            |
| rs1832835 | XP_498328 | C | Y | CY | benign            |
| rs1833363 | XP_496146 | A | V | AV | benign            |
| rs1833785 | NP_149121 | R | S | RS | benign            |
| rs1834026 | NP_036492 | F | S | FS | possibly damaging |
| rs1834697 | NP_006857 | H | L | HL | probably damaging |
| rs1834698 | NP_006857 | H | N | HN | benign            |
| rs1835183 | XP_372548 | G | E | GE | possibly damaging |
| rs1835996 | XP_047554 | C | Y | CY | probably damaging |
| rs1835996 | XP_047550 | C | Y | CY | probably damaging |
| rs1835997 | XP_047554 | C | Y | CY | possibly damaging |
| rs1835997 | XP_047550 | Y | C | YC | possibly damaging |
| rs1836270 | XP_208361 | I | V | IV | benign            |
| rs1837592 | XP_376869 | V | M | VM | benign            |
| rs1837949 | XP_370560 | I | T | IT | possibly damaging |
| rs1839604 | XP_496859 | V | L | VL | benign            |
| rs1840178 | XP_372370 | M | T | MT | benign            |
| rs1841958 | NP_038459 | I | S | IS | possibly damaging |
| rs1842691 | XP_372391 | P | S | PS | benign            |
| rs1842696 | XP_372390 | V | M | VM | benign            |
| rs1844340 | XP_498977 | L | V | LV | benign            |
| rs1845444 | NP_997222 | L | V | LV | benign            |
| rs1846149 | XP_498818 | L | P | LP | probably damaging |
| rs1846852 | NP_115640 | M | I | MI | benign            |
| rs1847102 | XP_372559 | S | A | SA | benign            |
| rs1847501 | XP_498108 | T | K | TK | possibly damaging |
| rs1847632 | XP_089863 | T | M | TM | possibly damaging |
| rs1849365 | XP_496406 | F | L | FL | benign            |
| rs1849733 | NP_060512 | R | S | RS | benign            |
| rs1851305 | XP_373077 | E | A | EA | benign            |



|           |           |   |   |    |                   |
|-----------|-----------|---|---|----|-------------------|
| rs1851716 | XP_373308 | S | T | ST | benign            |
| rs1851722 | XP_071093 | S | F | SF | benign            |
| rs1851723 | XP_071093 | N | S | NS | possibly damaging |
| rs1851724 | XP_071093 | M | T | MT | benign            |
| rs1851725 | XP_071093 | M | T | MT | benign            |
| rs1852431 | NP_612143 | K | Q | KQ | benign            |
| rs1852432 | NP_612143 | K | R | KR | possibly damaging |
| rs1852644 | XP_497843 | K | E | KE | benign            |
| rs1854421 | NP_005821 | T | M | TM | benign            |
| rs1854949 | XP_497064 | R | W | RW | benign            |
| rs1855377 | NP_066566 | V | I | VI | benign            |
| rs1859058 | XP_496237 | H | Y | HY | benign            |
| rs1859059 | NP_055613 | R | H | RH | benign            |
| rs1859298 | NP_039228 | H | Q | HQ | benign            |
| rs1859330 | NP_006178 | R | K | RK | benign            |
| rs1859728 | NP_003771 | Q | H | QH | benign            |
| rs1859788 | NP_840056 | R | G | RG | benign            |
| rs1859788 | NP_840057 | R | G | RG | benign            |
| rs1859788 | NP_038467 | R | G | RG | benign            |
| rs1860134 | XP_086001 | L | H | LH | probably damaging |
| rs1860150 | NP_940910 | K | T | KT | benign            |
| rs1860251 | NP_061746 | R | S | RS | benign            |
| rs1860251 | NP_115267 | R | S | RS | probably damaging |
| rs1860447 | NP_525022 | R | H | RH | benign            |
| rs1860447 | NP_759018 | R | H | RH | probably damaging |
| rs1860543 | NP_001295 | T | I | TI | benign            |
| rs1860596 | XP_039169 | R | H | RH | possibly damaging |
| rs1860961 | NP_065106 | S | A | SA | benign            |
| rs1861727 | NP_945341 | L | F | LF | benign            |
| rs1861948 | NP_060551 | P | S | PS | possibly damaging |
| rs1862136 | NP_115956 | L | V | LV | benign            |
| rs1862171 | NP_075064 | R | G | RG | possibly damaging |
| rs1862792 | NP_005144 | M | V | MV | benign            |
| rs1863703 | NP_056505 | K | R | KR | benign            |
| rs1863704 | NP_056505 | G | D | GD | possibly damaging |
| rs1863968 | NP_620687 | M | V | MV | benign            |
| rs1864011 | NP_001497 | F | L | FL | benign            |
| rs1864116 | NP_689576 | V | A | VA | benign            |
| rs1864183 | NP_113670 | T | M | TM | benign            |
| rs1864253 | NP_060470 | R | G | RG | possibly damaging |
| rs1864312 | NP_006052 | A | S | AS | benign            |
| rs1864345 | NP_689641 | E | K | EK | benign            |
| rs1864346 | XP_060957 | A | T | AT | benign            |
| rs1864423 | NP_000375 | T | N | TN | benign            |
| rs1864545 | NP_004760 | N | S | NS | benign            |
| rs1864545 | NP_064717 | N | S | NS | benign            |

|           |           |   |   |    |                   |
|-----------|-----------|---|---|----|-------------------|
| rs1864545 | NP_064718 | N | S | NS | benign            |
| rs1865102 | XP_292724 | Q | K | QK | benign            |
| rs1866389 | NP_003239 | A | P | AP | benign            |
| rs1866878 | NP_110430 | E | K | EK | benign            |
| rs1866878 | NP_060444 | E | K | EK | benign            |
| rs1866928 | NP_689472 | T | S | TS | benign            |
| rs1867165 | XP_292624 | P | S | PS | possibly damaging |
| rs1867298 | NP_059106 | S | I | SI | benign            |
| rs1867380 | NP_066190 | A | T | AT | benign            |
| rs1867586 | NP_067049 | T | K | TK | benign            |
| rs1867780 | XP_370878 | S | T | ST | benign            |
| rs1868024 | NP_477513 | S | P | SP | possibly damaging |
| rs1868463 | XP_292193 | R | H | RH | benign            |
| rs1869199 | XP_496026 | R | Q | RQ | benign            |
| rs1869349 | NP_877417 | R | H | RH | benign            |
| rs1869609 | NP_002371 | E | K | EK | benign            |
| rs1869609 | NP_085072 | E | K | EK | benign            |
| rs1869788 | NP_473373 | Y | C | YC | possibly damaging |
| rs1869803 | XP_172801 | D | E | DE | benign            |
| rs1870035 | NP_653273 | H | R | HR | probably damaging |
| rs1870035 | NP_733764 | H | R | HR | probably damaging |
| rs1870074 | XP_371196 | P | S | PS | benign            |
| rs1870377 | NP_002244 | Q | H | QH | possibly damaging |
| rs1870545 | NP_079059 | D | G | DG | possibly damaging |
| rs1871035 | NP_057450 | G | D | GD | benign            |
| rs1871415 | NP_597996 | A | V | AV | benign            |
| rs1871526 | XP_171032 | A | T | AT | benign            |
| rs1871533 | NP_570901 | T | M | TM | benign            |
| rs1871534 | NP_570901 | L | V | LV | benign            |
| rs1871748 | NP_000089 | S | C | SC | possibly damaging |
| rs1871892 | NP_060029 | S | P | SP | possibly damaging |
| rs1872267 | NP_996672 | R | W | RW | benign            |
| rs1872438 | NP_055686 | I | K | IK | benign            |
| rs1873379 | NP_056307 | A | P | AP | benign            |
| rs1873808 | NP_079032 | A | G | AG | benign            |
| rs1875845 | NP_859065 | G | D | GD | possibly damaging |
| rs1876025 | XP_372348 | K | T | KT | possibly damaging |
| rs1876268 | NP_060718 | R | G | RG | probably damaging |
| rs1876387 | NP_060404 | S | F | SF | benign            |
| rs1876388 | NP_060404 | N | T | NT | benign            |
| rs1877031 | NP_006795 | R | Q | RQ | benign            |
| rs1878061 | NP_852114 | G | R | GR | benign            |
| rs1878313 | NP_060101 | I | V | IV | benign            |
| rs1878326 | NP_005919 | M | L | ML | benign            |
| rs1878740 | NP_061027 | E | K | EK | benign            |
| rs1879761 | NP_919224 | A | V | AV | benign            |

|           |           |   |   |    |                   |
|-----------|-----------|---|---|----|-------------------|
| rs1880056 | XP_291745 | R | S | RS | benign            |
| rs1880458 | NP_055201 | V | I | VI | benign            |
| rs1881254 | XP_371486 | S | F | SF | possibly damaging |
| rs1881420 | NP_004295 | K | R | KR | benign            |
| rs1881421 | NP_004295 | D | E | DE | benign            |
| rs1881423 | NP_004295 | P | H | PH | probably damaging |
| rs1882118 | NP_775180 | L | V | LV | benign            |
| rs1882118 | NP_775181 | L | V | LV | benign            |
| rs1882655 | XP_380121 | M | T | MT | benign            |
| rs1883024 | NP_005493 | L | P | LP | possibly damaging |
| rs1883083 | NP_036350 | G | R | GR | possibly damaging |
| rs1883206 | NP_056189 | P | L | PL | possibly damaging |
| rs1883216 | NP_009080 | S | A | SA | benign            |
| rs1884146 | XP_497707 | C | R | CR | possibly damaging |
| rs1884147 | XP_497707 | R | H | RH | benign            |
| rs1884444 | NP_653302 | Q | H | QH | possibly damaging |
| rs1884504 | XP_371285 | P | S | PS | possibly damaging |
| rs1884643 | NP_689824 | T | A | TA | benign            |
| rs1885097 | NP_055792 | S | P | SP | benign            |
| rs1885137 | XP_170754 | E | A | EA | possibly damaging |
| rs1885434 | NP_006166 | R | C | RC | benign            |
| rs1885434 | NP_932326 | R | C | RC | benign            |
| rs1885533 | XP_375853 | V | A | VA | benign            |
| rs1885956 | NP_003882 | V | I | VI | benign            |
| rs1885986 | NP_060045 | R | P | RP | possibly damaging |
| rs1885987 | NP_060045 | T | N | TN | benign            |
| rs1886297 | NP_997281 | G | R | GR | probably damaging |
| rs1886686 | NP_079039 | A | G | AG | benign            |
| rs1886996 | NP_057279 | C | R | CR | benign            |
| rs1886997 | NP_057279 | N | S | NS | benign            |
| rs1887415 | NP_000407 | L | P | LP | possibly damaging |
| rs1889739 | NP_073615 | V | L | VL | benign            |
| rs1889789 | NP_000076 | G | A | GA | benign            |
| rs1891460 | NP_689704 | V | I | VI | benign            |
| rs1891627 | NP_689499 | R | W | RW | probably damaging |
| rs1891630 | NP_689499 | A | V | AV | benign            |
| rs1892442 | XP_060318 | Q | R | QR | benign            |
| rs1892443 | XP_060318 | C | R | CR | possibly damaging |
| rs1892722 | XP_496521 | C | R | CR | probably damaging |
| rs1892723 | XP_496521 | V | M | VM | benign            |
| rs1892814 | NP_056957 | F | L | FL | benign            |
| rs1893024 | XP_061880 | A | T | AT | benign            |
| rs1893135 | NP_036510 | L | F | LF | benign            |
| rs1893523 | NP_066015 | A | V | AV | benign            |
| rs1893764 | XP_372436 | P | S | PS | probably damaging |
| rs1893766 | XP_372436 | M | V | MV | benign            |

|           |           |   |   |    |                   |
|-----------|-----------|---|---|----|-------------------|
| rs1893963 | NP_004940 | I | V | IV | benign            |
| rs1893963 | NP_077740 | I | V | IV | benign            |
| rs1894176 | NP_899070 | R | Q | RQ | benign            |
| rs1894176 | NP_063947 | R | Q | RQ | benign            |
| rs1894263 | NP_068656 | I | K | IK | possibly damaging |
| rs1894263 | NP_000500 | I | K | IK | possibly damaging |
| rs1894359 | NP_705611 | Y | F | YF | benign            |
| rs1894473 | NP_115580 | R | C | RC | benign            |
| rs1894704 | NP_690054 | Q | H | QH | benign            |
| rs1894704 | NP_071364 | Q | H | QH | benign            |
| rs1894706 | NP_690054 | H | Y | HY | benign            |
| rs1894706 | NP_071364 | H | Y | HY | benign            |
| rs1895245 | NP_064552 | F | L | FL | possibly damaging |
| rs1897820 | NP_037388 | S | C | SC | benign            |
| rs1898548 | NP_054750 | R | L | RL | benign            |
| rs1898882 | NP_277045 | C | S | CS | probably damaging |
| rs1902023 | NP_001067 | D | Y | DY | benign            |
| rs1902836 | XP_496320 | S | I | SI | possibly damaging |
| rs1902837 | XP_496320 | S | I | SI | possibly damaging |
| rs1904589 | NP_060525 | R | H | RH | benign            |
| rs1905235 | NP_689911 | P | S | PS | benign            |
| rs1906643 | XP_371655 | H | N | HN | benign            |
| rs1907840 | XP_497051 | A | T | AT | benign            |
| rs1908946 | NP_006143 | C | S | CS | probably damaging |
| rs1908947 | NP_060742 | V | G | VG | possibly damaging |
| rs1909324 | XP_495930 | P | L | PL | probably damaging |
| rs1909771 | NP_787106 | A | T | AT | benign            |
| rs1910835 | XP_495872 | Y | N | YN | probably damaging |
| rs1914016 | NP_056078 | R | K | RK | benign            |
| rs1916036 | NP_062550 | A | G | AG | benign            |
| rs1916830 | NP_857597 | C | Y | CY | probably damaging |
| rs1916840 | NP_751946 | Q | H | QH | benign            |
| rs1916840 | NP_006863 | Q | H | QH | possibly damaging |
| rs1918496 | NP_055686 | L | I | LI | benign            |
| rs1920305 | NP_066568 | R | H | RH | possibly damaging |
| rs1920314 | NP_066568 | M | L | ML | benign            |
| rs1920866 | XP_496692 | L | F | LF | benign            |
| rs1923185 | NP_056979 | N | T | NT | benign            |
| rs1925368 | NP_665803 | H | Q | HQ | benign            |
| rs1926447 | NP_057497 | I | T | IT | benign            |
| rs1926447 | NP_001863 | T | I | TI | benign            |
| rs1926736 | NP_002429 | G | S | GS | possibly damaging |
| rs1926899 | XP_497684 | R | S | RS | possibly damaging |
| rs1929860 | NP_055641 | V | I | VI | benign            |
| rs1929860 | NP_003598 | V | I | VI | benign            |
| rs1932618 | NP_001695 | S | N | SN | benign            |

|           |           |   |   |    |                   |
|-----------|-----------|---|---|----|-------------------|
| rs1932993 | NP_056108 | E | K | EK | benign            |
| rs1932993 | NP_149062 | E | K | EK | benign            |
| rs1932993 | NP_892006 | E | K | EK | benign            |
| rs1933631 | NP_006606 | K | Q | KQ | benign            |
| rs1934436 | NP_859066 | L | I | LI | benign            |
| rs1934437 | NP_859066 | L | M | LM | benign            |
| rs1934535 | NP_563581 | H | R | HR | possibly damaging |
| rs1934536 | XP_086876 | W | R | WR | possibly damaging |
| rs1935241 | XP_498338 | A | S | AS | benign            |
| rs1935680 | XP_498132 | W | R | WR | benign            |
| rs1939015 | NP_071405 | M | T | MT | possibly damaging |
| rs1939569 | XP_374922 | Y | C | YC | probably damaging |
| rs1939748 | NP_775857 | S | T | ST | benign            |
| rs1939927 | XP_290501 | C | R | CR | probably damaging |
| rs1940475 | NP_002415 | K | E | KE | benign            |
| rs1941635 | NP_899070 | G | V | GV | probably damaging |
| rs1941635 | NP_063947 | G | V | GV | probably damaging |
| rs1942418 | XP_371116 | G | E | GE | benign            |
| rs1943330 | NP_114097 | P | H | PH | benign            |
| rs1943382 | NP_055880 | D | N | DN | benign            |
| rs1944169 | NP_055176 | Y | F | YF | benign            |
| rs1944169 | NP_780775 | Y | F | YF | benign            |
| rs1944270 | NP_942130 | R | Q | RQ | benign            |
| rs1944270 | NP_002631 | R | Q | RQ | benign            |
| rs1945237 | XP_372397 | K | R | KR | possibly damaging |
| rs1945783 | XP_291947 | N | D | ND | benign            |
| rs1946586 | NP_659400 | Y | C | YC | benign            |
| rs1948516 | NP_115632 | R | H | RH | benign            |
| rs1949471 | NP_004078 | Q | R | QR | benign            |
| rs1950504 | NP_062813 | D | G | DG | benign            |
| rs1950902 | NP_005947 | R | K | RK | benign            |
| rs1950952 | NP_005921 | E | Q | EQ | benign            |
| rs1950952 | NP_976230 | E | Q | EQ | benign            |
| rs1950952 | NP_976231 | E | Q | EQ | benign            |
| rs1950952 | NP_976229 | E | Q | EQ | benign            |
| rs1950952 | NP_976232 | E | Q | EQ | benign            |
| rs1951789 | XP_495989 | L | M | LM | benign            |
| rs1952061 | NP_055287 | R | H | RH | benign            |
| rs1952294 | XP_371320 | S | P | SP | possibly damaging |
| rs1953758 | NP_997186 | S | N | SN | benign            |
| rs1954782 | NP_064578 | K | Q | KQ | benign            |
| rs1956551 | NP_777638 | Y | C | YC | probably damaging |
| rs1958260 | NP_115983 | G | D | GD | possibly damaging |
| rs1958396 | XP_370737 | L | S | LS | benign            |
| rs1958715 | XP_063310 | D | N | DN | benign            |
| rs1958716 | XP_063310 | M | V | MV | benign            |

|           |           |   |   |    |                   |
|-----------|-----------|---|---|----|-------------------|
| rs1959379 | NP_115511 | S | P | SP | benign            |
| rs1959630 | XP_063310 | R | S | RS | benign            |
| rs1960188 | NP_077078 | L | V | LV | benign            |
| rs1960188 | NP_003285 | L | V | LV | benign            |
| rs1961760 | NP_060899 | F | I | FI | benign            |
| rs1961808 | XP_372543 | S | N | SN | benign            |
| rs1962101 | NP_001628 | S | Y | SY | benign            |
| rs1962165 | NP_002772 | N | K | NK | possibly damaging |
| rs1962318 | XP_497133 | A | T | AT | benign            |
| rs1963629 | XP_062300 | E | K | EK | benign            |
| rs1964954 | XP_496541 | Q | H | QH | benign            |
| rs1965207 | XP_062286 | I | M | IM | benign            |
| rs1965208 | XP_062286 | I | T | IT | benign            |
| rs1965209 | XP_062286 | S | P | SP | probably damaging |
| rs1965665 | NP_056025 | Q | R | QR | benign            |
| rs1965692 | XP_498236 | R | H | RH | benign            |
| rs1965708 | NP_005402 | Q | K | QK | benign            |
| rs1966087 | XP_496406 | D | G | DG | possibly damaging |
| rs1966357 | NP_039226 | R | S | RS | possibly damaging |
| rs1966834 | XP_166917 | H | R | HR | benign            |
| rs1966835 | XP_166917 | I | T | IT | benign            |
| rs1966836 | XP_166917 | S | G | SG | benign            |
| rs1967411 | XP_372377 | V | F | VF | benign            |
| rs1967445 | NP_055554 | L | H | LH | benign            |
| rs1967446 | NP_055554 | Y | D | YD | probably damaging |
| rs1967646 | NP_001459 | D | H | DH | benign            |
| rs1968090 | NP_998763 | L | H | LH | possibly damaging |
| rs1968956 | XP_371262 | H | Q | HQ | probably damaging |
| rs1969260 | XP_497846 | T | I | TI | possibly damaging |
| rs1969620 | NP_004397 | N | D | ND | benign            |
| rs1970019 | XP_498326 | T | K | TK | benign            |
| rs1970019 | XP_498328 | T | K | TK | benign            |
| rs1970473 | NP_940979 | F | C | FC | probably damaging |
| rs1970721 | XP_497309 | R | C | RC | probably damaging |
| rs1970911 | XP_029353 | A | V | AV | benign            |
| rs1971415 | XP_372030 | S | C | SC | benign            |
| rs1971415 | XP_372028 | S | C | SC | benign            |
| rs1972551 | XP_165511 | N | T | NT | benign            |
| rs1972977 | NP_997248 | S | A | SA | benign            |
| rs1973019 | NP_003821 | V | A | VA | benign            |
| rs1974522 | NP_056234 | P | S | PS | benign            |
| rs1974777 | NP_056280 | Q | R | QR | benign            |
| rs1974982 | NP_006854 | R | G | RG | probably damaging |
| rs1975003 | NP_079235 | P | S | PS | possibly damaging |
| rs1975349 | XP_371140 | C | R | CR | possibly damaging |
| rs1975713 | XP_371488 | P | L | PL | possibly damaging |

|           |           |   |   |    |                   |
|-----------|-----------|---|---|----|-------------------|
| rs1975937 | NP_689819 | D | V | DV | probably damaging |
| rs1976666 | NP_001066 | P | A | PA | probably damaging |
| rs1977172 | XP_371817 | N | T | NT | benign            |
| rs1977420 | NP_057041 | C | Y | CY | probably damaging |
| rs1977983 | NP_001610 | D | V | DV | probably damaging |
| rs1977994 | NP_777594 | N | H | NH | benign            |
| rs1978066 | NP_065769 | D | Y | DY | probably damaging |
| rs1978067 | NP_149098 | N | D | ND | benign            |
| rs1978144 | NP_757386 | S | L | SL | possibly damaging |
| rs1978651 | NP_722577 | R | K | RK | benign            |
| rs1978717 | NP_940882 | T | I | TI | benign            |
| rs1978725 | NP_116126 | P | L | PL | probably damaging |
| rs1979277 | NP_683718 | L | F | LF | benign            |
| rs1979277 | NP_004160 | L | F | LF | benign            |
| rs1979370 | NP_075462 | T | A | TA | benign            |
| rs1979586 | XP_370702 | S | F | SF | benign            |
| rs1980299 | NP_001958 | N | K | NK | probably damaging |
| rs1980522 | NP_055906 | R | I | RI | possibly damaging |
| rs1980600 | NP_001723 | V | A | VA | benign            |
| rs1981235 | XP_377644 | E | A | EA | benign            |
| rs1981235 | XP_291645 | E | A | EA | benign            |
| rs1981236 | XP_377644 | V | I | VI | benign            |
| rs1981236 | XP_291645 | V | I | VI | benign            |
| rs1981498 | NP_003037 | Q | L | QL | probably damaging |
| rs1981656 | NP_002005 | T | S | TS | benign            |
| rs1982074 | NP_835388 | L | P | LP | possibly damaging |
| rs1982074 | NP_075384 | L | P | LP | possibly damaging |
| rs1982151 | NP_079221 | S | N | SN | benign            |
| rs1982338 | XP_496623 | L | P | LP | possibly damaging |
| rs1982394 | XP_171766 | P | L | PL | probably damaging |
| rs1982528 | NP_004583 | L | P | LP | probably damaging |
| rs1983210 | XP_051017 | E | D | ED | benign            |
| rs1983346 | NP_006092 | A | P | AP | benign            |
| rs1983406 | NP_085054 | E | D | ED | benign            |
| rs1983609 | NP_037459 | V | A | VA | benign            |
| rs1983864 | NP_115587 | A | D | AD | probably damaging |
| rs1984381 | NP_006364 | P | A | PA | possibly damaging |
| rs1984432 | XP_371192 | V | I | VI | benign            |
| rs1984564 | NP_005759 | I | T | IT | benign            |
| rs1985393 | NP_777611 | K | N | KN | benign            |
| rs1985921 | NP_072051 | E | G | EG | possibly damaging |
| rs1986751 | XP_377488 | A | S | AS | benign            |
| rs1987324 | XP_371409 | F | L | FL | probably damaging |
| rs1987546 | NP_001519 | F | L | FL | benign            |
| rs1988062 | NP_705691 | D | Y | DY | probably damaging |
| rs1988688 | NP_443092 | Q | H | QH | possibly damaging |

|           |           |   |   |    |                   |
|-----------|-----------|---|---|----|-------------------|
| rs1990236 | NP_001363 | M | I | MI | probably damaging |
| rs1990236 | NP_004653 | M | I | MI | probably damaging |
| rs1990312 | NP_006413 | E | K | EK | benign            |
| rs1990313 | NP_006413 | I | T | IT | benign            |
| rs1990760 | NP_071451 | A | T | AT | benign            |
| rs1991020 | XP_370944 | F | L | FL | benign            |
| rs1991517 | NP_000360 | D | E | DE | benign            |
| rs1993088 | XP_166917 | N | D | ND | benign            |
| rs1995641 | NP_003232 | K | E | KE | benign            |
| rs1995914 | XP_498355 | N | T | NT | benign            |
| rs1995915 | XP_498355 | R | K | RK | benign            |
| rs1996173 | NP_003653 | P | L | PL | probably damaging |
| rs1996276 | NP_004727 | Y | H | YH | possibly damaging |
| rs1996904 | XP_171032 | L | V | LV | benign            |
| rs1996963 | XP_371884 | V | G | VG | benign            |
| rs1997607 | NP_037372 | D | N | DN | possibly damaging |
| rs1997607 | NP_877426 | D | N | DN | possibly damaging |
| rs1997618 | NP_005493 | I | T | IT | possibly damaging |
| rs1997639 | NP_005220 | G | S | GS | benign            |
| rs1998089 | XP_499140 | L | P | LP | benign            |
| rs1998206 | NP_002935 | T | P | TP | possibly damaging |
| rs1998390 | XP_498092 | E | K | EK | benign            |
| rs1998813 | XP_376527 | V | L | VL | benign            |
| rs1998972 | NP_694999 | N | S | NS | benign            |
| rs1999240 | NP_059129 | S | R | SR | benign            |
| rs1999272 | NP_004806 | D | G | DG | possibly damaging |
| rs1999663 | NP_149974 | S | T | ST | benign            |
| rs2000326 | NP_055036 | S | F | SF | benign            |
| rs2000390 | XP_377645 | S | N | SN | possibly damaging |
| rs2000745 | XP_371118 | R | G | RG | probably damaging |
| rs2000746 | XP_371118 | I | T | IT | possibly damaging |
| rs2000813 | NP_006024 | T | I | TI | benign            |
| rs2001301 | NP_004726 | N | S | NS | benign            |
| rs2001490 | NP_057431 | A | G | AG | benign            |
| rs2001616 | NP_054799 | P | L | PL | probably damaging |
| rs2002400 | XP_497653 | P | R | PR | benign            |
| rs2002400 | XP_377566 | P | R | PR | benign            |
| rs2003301 | XP_380121 | D | H | DH | possibly damaging |
| rs2003365 | XP_497700 | E | G | EG | probably damaging |
| rs2003783 | NP_001639 | L | I | LI | benign            |
| rs2003812 | NP_061876 | C | R | CR | benign            |
| rs2005199 | NP_942143 | L | F | LF | benign            |
| rs2005199 | NP_001236 | L | F | LF | benign            |
| rs2005199 | NP_942142 | L | F | LF | benign            |
| rs2005771 | NP_055963 | G | D | GD | possibly damaging |
| rs2006715 | NP_001089 | G | W | GW | probably damaging |



|           |           |   |   |    |                   |
|-----------|-----------|---|---|----|-------------------|
| rs2006771 | XP_038520 | R | Q | RQ | benign            |
| rs2006825 | XP_371783 | M | T | MT | benign            |
| rs2006825 | NP_775934 | M | T | MT | benign            |
| rs2006845 | NP_005437 | R | W | RW | benign            |
| rs2006846 | NP_005437 | V | G | VG | possibly damaging |
| rs2007902 | XP_498333 | A | G | AG | benign            |
| rs2008144 | NP_004979 | R | Q | RQ | benign            |
| rs2008160 | NP_004979 | A | T | AT | benign            |
| rs2008516 | XP_498013 | Y | C | YC | probably damaging |
| rs2008720 | NP_057419 | Q | P | QP | benign            |
| rs2008733 | NP_057419 | L | F | LF | benign            |
| rs2009742 | XP_498369 | A | V | AV | benign            |
| rs2009813 | NP_001026 | N | S | NS | benign            |
| rs2010027 | XP_496218 | R | H | RH | probably damaging |
| rs2010519 | NP_689477 | G | E | GE | benign            |
| rs2010627 | XP_497598 | S | G | SG | benign            |
| rs2010722 | XP_372348 | T | I | TI | benign            |
| rs2010875 | NP_079477 | P | S | PS | benign            |
| rs2011331 | XP_048104 | A | T | AT | benign            |
| rs2011379 | XP_497613 | V | M | VM | benign            |
| rs2011425 | NP_009051 | L | V | LV | benign            |
| rs2011560 | XP_291277 | H | Q | HQ | benign            |
| rs2011951 | NP_057100 | F | L | FL | benign            |
| rs2012109 | NP_005050 | G | E | GE | benign            |
| rs2012109 | NP_604390 | G | E | GE | benign            |
| rs2012199 | NP_112571 | D | G | DG | possibly damaging |
| rs2012574 | NP_057431 | G | R | GR | possibly damaging |
| rs2012597 | NP_005035 | P | L | PL | probably damaging |
| rs2012736 | NP_061951 | L | I | LI | benign            |
| rs2013335 | NP_775487 | P | L | PL | probably damaging |
| rs2013373 | NP_002063 | R | K | RK | benign            |
| rs2013501 | XP_373252 | L | P | LP | probably damaging |
| rs2013503 | XP_373252 | S | N | SN | benign            |
| rs2013622 | NP_004477 | V | I | VI | benign            |
| rs2013927 | XP_373038 | M | V | MV | possibly damaging |
| rs2014055 | NP_006030 | V | I | VI | benign            |
| rs2014377 | NP_787071 | V | L | VL | benign            |
| rs2014410 | NP_690054 | L | V | LV | benign            |
| rs2014410 | NP_690056 | L | V | LV | benign            |
| rs2014410 | NP_071364 | L | V | LV | benign            |
| rs2014551 | NP_783856 | V | I | VI | benign            |
| rs2014551 | NP_005627 | V | I | VI | benign            |
| rs2014572 | XP_372753 | G | E | GE | possibly damaging |
| rs2014576 | NP_787071 | P | S | PS | possibly damaging |
| rs2014840 | NP_000958 | G | V | GV | probably damaging |
| rs2014864 | XP_371783 | L | F | LF | benign            |

|           |           |   |   |    |                   |
|-----------|-----------|---|---|----|-------------------|
| rs2014864 | NP_775934 | L | F | LF | benign            |
| rs2015018 | XP_373440 | D | G | DG | benign            |
| rs2015076 | NP_671728 | R | C | RC | possibly damaging |
| rs2015352 | NP_000076 | L | R | LR | possibly damaging |
| rs2016123 | NP_006096 | G | R | GR | possibly damaging |
| rs2016126 | NP_060198 | M | V | MV | benign            |
| rs2017023 | NP_061092 | R | K | RK | benign            |
| rs2017034 | NP_061092 | E | K | EK | benign            |
| rs2017252 | NP_066971 | E | D | ED | benign            |
| rs2017768 | XP_499097 | I | T | IT | benign            |
| rs2017768 | XP_499099 | I | T | IT | benign            |
| rs2018645 | NP_003432 | K | N | KN | benign            |
| rs2018795 | NP_115981 | D | E | DE | benign            |
| rs2019515 | XP_371401 | L | F | LF | benign            |
| rs2019521 | NP_066271 | D | E | DE | benign            |
| rs2019521 | NP_072166 | D | E | DE | benign            |
| rs2019521 | NP_072170 | D | E | DE | benign            |
| rs2019521 | NP_001308 | D | E | DE | benign            |
| rs2019552 | NP_004404 | E | Q | EQ | benign            |
| rs2019654 | XP_496349 | H | Y | HY | benign            |
| rs2020050 | NP_005050 | V | F | VF | benign            |
| rs2020050 | NP_604390 | V | F | VF | benign            |
| rs2020390 | NP_660341 | A | S | AS | benign            |
| rs2020433 | NP_775931 | G | D | GD | benign            |
| rs2020860 | NP_001451 | F | S | FS | probably damaging |
| rs2020862 | NP_001451 | S | L | SL | probably damaging |
| rs2020863 | NP_001451 | E | G | EG | probably damaging |
| rs2020865 | NP_001451 | N | K | NK | benign            |
| rs2020870 | NP_001451 | D | G | DG | probably damaging |
| rs2020872 | NP_000240 | I | V | IV | benign            |
| rs2020873 | NP_000240 | H | Y | HY | possibly damaging |
| rs2020874 | NP_000917 | R | I | RI | benign            |
| rs2020880 | NP_000917 | S | L | SL | possibly damaging |
| rs2020893 | NP_002403 | E | K | EK | benign            |
| rs2020897 | NP_127463 | E | D | ED | benign            |
| rs2020897 | NP_001220 | E | D | ED | benign            |
| rs2020908 | NP_000170 | L | V | LV | benign            |
| rs2020912 | NP_000170 | V | A | VA | possibly damaging |
| rs2020914 | NP_000170 | I | V | IV | benign            |
| rs2020916 | NP_000628 | P | H | PH | possibly damaging |
| rs2020921 | NP_000922 | R | W | RW | probably damaging |
| rs2020921 | NP_000921 | R | W | RW | probably damaging |
| rs2020921 | NP_127509 | R | W | RW | probably damaging |
| rs2020945 | NP_005040 | N | D | ND | benign            |
| rs2020955 | NP_005227 | S | P | SP | benign            |
| rs2020956 | NP_005227 | G | E | GE | benign            |

|           |              |   |   |    |                   |
|-----------|--------------|---|---|----|-------------------|
| rs2020957 | NP_005227    | I | V | IV | benign            |
| rs2020961 | NP_005227    | A | V | AV | benign            |
| rs2021052 | NP_061760    | V | M | VM | benign            |
| rs2021810 | XP_498321    | E | K | EK | benign            |
| rs2022039 | NP_542775    | V | I | VI | benign            |
| rs2022923 | NP_689841    | D | G | DG | possibly damaging |
| rs2023329 | NP_060866    | N | H | NH | benign            |
| rs2023478 | XP_496802    | A | V | AV | benign            |
| rs2023616 | NP_000583    | I | F | IF | benign            |
| rs2023616 | NP_001002029 | I | F | IF | benign            |
| rs2024301 | NP_919432    | H | L | HL | benign            |
| rs2024301 | NP_057268    | H | L | HL | benign            |
| rs2024320 | NP_954980    | E | Q | EQ | benign            |
| rs2025762 | XP_371731    | M | L | ML | benign            |
| rs2026477 | XP_372190    | N | T | NT | benign            |
| rs2026757 | NP_954673    | W | G | WG | probably damaging |
| rs2026757 | NP_954580    | W | G | WG | probably damaging |
| rs2027063 | NP_777570    | R | I | RI | possibly damaging |
| rs2027937 | NP_061925    | A | T | AT | benign            |
| rs2030259 | NP_060903    | I | V | IV | benign            |
| rs2031032 | NP_000088    | E | K | EK | benign            |
| rs2031640 | NP_055178    | N | K | NK | possibly damaging |
| rs2032066 | NP_009106    | V | A | VA | benign            |
| rs2032567 | NP_002281    | S | G | SG | benign            |
| rs2032581 | NP_000918    | I | V | IV | benign            |
| rs2032582 | NP_000918    | S | T | ST | benign            |
| rs2032596 | NP_004645    | R | C | RC | benign            |
| rs2032606 | NP_004645    | A | S | AS | benign            |
| rs2032618 | NP_004644    | V | M | VM | benign            |
| rs2032729 | NP_008896    | S | N | SN | benign            |
| rs2032811 | NP_056418    | E | D | ED | benign            |
| rs2032844 | NP_775894    | E | D | ED | benign            |
| rs2032887 | NP_005615    | H | R | HR | benign            |
| rs2032892 | NP_004163    | E | D | ED | benign            |
| rs2032917 | NP_078982    | L | V | LV | benign            |
| rs2033262 | NP_057524    | S | F | SF | possibly damaging |
| rs2033652 | NP_004027    | S | F | SF | possibly damaging |
| rs2034528 | NP_775862    | V | I | VI | benign            |
| rs2034648 | NP_055729    | I | V | IV | benign            |
| rs2034964 | NP_002244    | D | N | DN | benign            |
| rs2035820 | NP_683692    | T | M | TM | benign            |
| rs2035970 | XP_377506    | T | M | TM | benign            |
| rs2036553 | XP_495930    | D | A | DA | benign            |
| rs2037101 | NP_000527    | R | K | RK | benign            |
| rs2037443 | XP_496238    | I | M | IM | benign            |
| rs2037912 | NP_002696    | Q | E | QE | benign            |

|           |           |   |   |    |                   |
|-----------|-----------|---|---|----|-------------------|
| rs2039475 | NP_878918 | H | Y | HY | benign            |
| rs2040533 | NP_443112 | S | T | ST | benign            |
| rs2041028 | XP_291816 | P | L | PL | possibly damaging |
| rs2041049 | NP_006707 | H | R | HR | possibly damaging |
| rs2041290 | NP_006413 | S | P | SP | benign            |
| rs2041291 | NP_006413 | S | F | SF | benign            |
| rs2041385 | NP_060479 | V | A | VA | benign            |
| rs2041387 | NP_060479 | V | A | VA | benign            |
| rs2042200 | NP_077011 | A | V | AV | benign            |
| rs2042791 | NP_078808 | Q | H | QH | benign            |
| rs2042919 | NP_079337 | E | G | EG | benign            |
| rs2043112 | XP_380173 | S | F | SF | benign            |
| rs2043289 | XP_497610 | R | C | RC | probably damaging |
| rs2043449 | NP_065725 | S | L | SL | benign            |
| rs2043449 | NP_803882 | S | L | SL | benign            |
| rs2044276 | XP_017966 | A | T | AT | benign            |
| rs2044502 | NP_870992 | S | T | ST | benign            |
| rs2044693 | NP_064528 | R | G | RG | benign            |
| rs2044909 | NP_775936 | K | E | KE | benign            |
| rs2045732 | NP_055105 | V | A | VA | benign            |
| rs2046938 | NP_006506 | E | K | EK | benign            |
| rs2050949 | NP_005311 | E | K | EK | benign            |
| rs2052191 | XP_114000 | A | T | AT | benign            |
| rs2052937 | NP_722577 | A | T | AT | benign            |
| rs2053028 | NP_001438 | L | S | LS | benign            |
| rs2053116 | XP_061627 | S | A | SA | benign            |
| rs2053379 | XP_371878 | N | S | NS | benign            |
| rs2053380 | XP_371878 | T | M | TM | benign            |
| rs2055006 | NP_937801 | V | A | VA | benign            |
| rs2055006 | NP_937802 | V | A | VA | benign            |
| rs2055006 | NP_006713 | V | A | VA | benign            |
| rs2055006 | NP_937820 | V | A | VA | benign            |
| rs2055006 | NP_937821 | V | A | VA | benign            |
| rs2055006 | NP_000239 | V | A | VA | benign            |
| rs2055780 | NP_055721 | S | F | SF | possibly damaging |
| rs2056844 | NP_061836 | Q | E | QE | benign            |
| rs2056844 | NP_387505 | Q | E | QE | benign            |
| rs2056899 | XP_208213 | N | Y | NY | probably damaging |
| rs2056900 | XP_208213 | G | S | GS | possibly damaging |
| rs2057413 | NP_114121 | M | V | MV | benign            |
| rs2058194 | NP_000325 | D | N | DN | possibly damaging |
| rs2058322 | NP_055186 | Q | H | QH | possibly damaging |
| rs2059696 | NP_002340 | H | Y | HY | benign            |
| rs2059802 | NP_064613 | M | L | ML | benign            |
| rs2059802 | NP_955469 | M | L | ML | benign            |
| rs2059802 | NP_955471 | M | L | ML | benign            |

|           |           |   |   |    |                   |
|-----------|-----------|---|---|----|-------------------|
| rs2059802 | NP_955470 | M | L | ML | benign            |
| rs2060263 | NP_443074 | G | V | GV | probably damaging |
| rs2060872 | XP_496026 | I | M | IM | benign            |
| rs2061007 | NP_689662 | A | G | AG | benign            |
| rs2061634 | XP_372133 | S | C | SC | benign            |
| rs2061690 | NP_065385 | G | D | GD | benign            |
| rs2061699 | XP_291111 | S | L | SL | benign            |
| rs2061821 | NP_009131 | M | T | MT | benign            |
| rs2061821 | NP_006729 | M | T | MT | benign            |
| rs2061822 | NP_009131 | W | R | WR | benign            |
| rs2061822 | NP_006729 | W | R | WR | benign            |
| rs2061824 | NP_009131 | R | C | RC | probably damaging |
| rs2061824 | NP_006729 | R | C | RC | probably damaging |
| rs2062970 | XP_371701 | L | M | LM | possibly damaging |
| rs2062988 | NP_061176 | I | M | IM | probably damaging |
| rs2063188 | XP_372651 | K | R | KR | benign            |
| rs2063690 | NP_060328 | A | G | AG | benign            |
| rs2063743 | XP_496092 | T | I | TI | benign            |
| rs2064317 | NP_003313 | I | T | IT | benign            |
| rs2064318 | NP_003313 | N | K | NK | benign            |
| rs2064455 | NP_899228 | Q | H | QH | benign            |
| rs2065434 | XP_372112 | A | V | AV | benign            |
| rs2065649 | XP_371801 | I | V | IV | benign            |
| rs2066455 | NP_000525 | E | D | ED | benign            |
| rs2066456 | NP_000525 | N | S | NS | possibly damaging |
| rs2066459 | NP_000525 | R | K | RK | benign            |
| rs2066472 | NP_005948 | R | Q | RQ | benign            |
| rs2066479 | NP_000188 | G | S | GS | benign            |
| rs2066480 | NP_000188 | V | I | VI | benign            |
| rs2066492 | NP_004575 | S | A | SA | benign            |
| rs2066497 | NP_853551 | V | A | VA | benign            |
| rs2066512 | NP_001489 | L | S | LS | possibly damaging |
| rs2066518 | NP_054859 | E | Q | EQ | benign            |
| rs2066520 | NP_054859 | D | V | DV | probably damaging |
| rs2066522 | NP_054859 | S | R | SR | benign            |
| rs2066523 | NP_054859 | D | N | DN | benign            |
| rs2066524 | NP_054859 | A | T | AT | benign            |
| rs2066530 | NP_008825 | V | A | VA | benign            |
| rs2066532 | NP_008825 | E | Q | EQ | benign            |
| rs2066575 | NP_005878 | C | S | CS | probably damaging |
| rs2066702 | NP_000659 | R | C | RC | probably damaging |
| rs2066703 | NP_077816 | T | M | TM | possibly damaging |
| rs2066704 | NP_077816 | A | T | AT | benign            |
| rs2066718 | NP_005493 | V | M | VM | benign            |
| rs2066727 | NP_003487 | V | A | VA | benign            |
| rs2066729 | NP_003487 | M | I | MI | possibly damaging |

|           |           |   |   |    |                   |
|-----------|-----------|---|---|----|-------------------|
| rs2066776 | NP_002960 | T | M | TM | possibly damaging |
| rs2066791 | NP_002904 | I | V | IV | benign            |
| rs2066807 | NP_005410 | M | I | MI | benign            |
| rs2066809 | NP_005410 | S | I | SI | possibly damaging |
| rs2066811 | NP_005410 | I | V | IV | benign            |
| rs2066815 | NP_005410 | T | M | TM | possibly damaging |
| rs2066816 | NP_005410 | Q | H | QH | possibly damaging |
| rs2066817 | NP_005410 | L | P | LP | possibly damaging |
| rs2066827 | NP_004055 | V | G | VG | benign            |
| rs2066828 | NP_004055 | R | W | RW | probably damaging |
| rs2066842 | NP_071445 | P | S | PS | benign            |
| rs2066844 | NP_071445 | R | W | RW | possibly damaging |
| rs2066845 | NP_071445 | G | R | GR | probably damaging |
| rs2066853 | NP_001612 | R | K | RK | benign            |
| rs2066870 | NP_068656 | Y | H | YH | benign            |
| rs2066870 | NP_000500 | Y | H | YH | benign            |
| rs2066964 | NP_438170 | R | S | RS | benign            |
| rs2066964 | NP_077015 | R | S | RS | benign            |
| rs2066982 | NP_061978 | R | Q | RQ | benign            |
| rs2067019 | NP_055243 | R | H | RH | possibly damaging |
| rs2067466 | NP_000852 | K | N | KN | benign            |
| rs2067467 | NP_000852 | D | E | DE | benign            |
| rs2067470 | NP_000852 | L | S | LS | benign            |
| rs2067481 | NP_000731 | V | I | VI | benign            |
| rs2067648 | XP_292225 | S | N | SN | benign            |
| rs2067660 | XP_495917 | S | F | SF | benign            |
| rs2067912 | NP_079431 | C | S | CS | probably damaging |
| rs2068026 | XP_371933 | G | V | GV | benign            |
| rs2068061 | NP_037530 | V | M | VM | benign            |
| rs2068178 | NP_115876 | E | K | EK | benign            |
| rs2068243 | NP_996769 | M | T | MT | possibly damaging |
| rs2068268 | XP_208438 | D | E | DE | benign            |
| rs2069352 | NP_954854 | N | H | NH | possibly damaging |
| rs2069413 | NP_439892 | T | S | TS | benign            |
| rs2069413 | NP_001789 | T | S | TS | benign            |
| rs2069532 | NP_001249 | T | I | TI | benign            |
| rs2069640 | NP_000749 | T | I | TI | benign            |
| rs2069683 | NP_004092 | N | D | ND | benign            |
| rs2069700 | NP_004092 | M | V | MV | benign            |
| rs2069830 | NP_000591 | P | S | PS | benign            |
| rs2069860 | NP_000591 | D | V | DV | possibly damaging |
| rs2069885 | NP_000581 | T | M | TM | benign            |
| rs2069975 | NP_000615 | S | G | SG | benign            |
| rs2069976 | NP_000615 | G | V | GV | probably damaging |
| rs2069999 | NP_000615 | L | P | LP | possibly damaging |
| rs2070025 | NP_000499 | I | V | IV | benign            |

|           |           |   |   |    |                   |
|-----------|-----------|---|---|----|-------------------|
| rs2070031 | NP_068657 | T | A | TA | benign            |
| rs2070031 | NP_000499 | T | A | TA | benign            |
| rs2070074 | NP_000146 | N | D | ND | benign            |
| rs2070094 | NP_000456 | V | M | VM | benign            |
| rs2070099 | NP_001657 | V | L | VL | benign            |
| rs2070121 | NP_002111 | L | F | LF | benign            |
| rs2070123 | NP_006408 | R | W | RW | probably damaging |
| rs2070132 | NP_009076 | K | R | KR | benign            |
| rs2070150 | NP_031374 | P | A | PA | benign            |
| rs2070159 | NP_001664 | A | T | AT | benign            |
| rs2070159 | NP_597680 | A | T | AT | benign            |
| rs2070159 | NP_899199 | A | T | AT | benign            |
| rs2070163 | NP_005324 | A | V | AV | benign            |
| rs2070215 | NP_005907 | N | S | NS | benign            |
| rs2070235 | NP_002457 | S | G | SG | benign            |
| rs2070317 | NP_777557 | V | I | VI | benign            |
| rs2070325 | NP_872325 | I | V | IV | benign            |
| rs2070425 | NP_006022 | P | L | PL | probably damaging |
| rs2070426 | NP_006022 | Q | H | QH | benign            |
| rs2070446 | NP_705843 | H | Y | HY | benign            |
| rs2070449 | NP_705843 | M | R | MR | possibly damaging |
| rs2070492 | NP_004794 | A | V | AV | benign            |
| rs2070507 | NP_055449 | L | R | LR | benign            |
| rs2070600 | NP_751947 | G | S | GS | possibly damaging |
| rs2070600 | NP_001127 | G | S | GS | possibly damaging |
| rs2070661 | NP_002510 | I | V | IV | benign            |
| rs2070739 | NP_149162 | G | S | GS | benign            |
| rs2070745 | NP_002020 | V | L | VL | benign            |
| rs2070818 | NP_000108 | D | H | DH | possibly damaging |
| rs2070832 | NP_666016 | S | G | SG | benign            |
| rs2070845 | NP_001538 | R | K | RK | benign            |
| rs2070856 | NP_001889 | P | L | PL | possibly damaging |
| rs2070862 | NP_000925 | A | V | AV | benign            |
| rs2070863 | NP_000925 | W | R | WR | benign            |
| rs2070956 | NP_000138 | P | R | PR | probably damaging |
| rs2070959 | NP_001063 | T | A | TA | benign            |
| rs2071024 | NP_008859 | P | H | PH | probably damaging |
| rs2071072 | NP_964013 | N | H | NH | possibly damaging |
| rs2071072 | NP_008923 | N | H | NH | possibly damaging |
| rs2071073 | NP_964013 | R | L | RL | benign            |
| rs2071073 | NP_008923 | R | L | RL | benign            |
| rs2071126 | NP_000045 | G | E | GE | benign            |
| rs2071152 | NP_003265 | V | M | VM | benign            |
| rs2071192 | NP_001979 | Q | R | QR | benign            |
| rs2071214 | NP_001159 | K | E | KE | benign            |
| rs2071240 | NP_000347 | P | A | PA | benign            |

|           |           |   |   |    |                   |
|-----------|-----------|---|---|----|-------------------|
| rs2071289 | NP_085155 | A | E | AE | benign            |
| rs2071306 | NP_004952 | A | S | AS | benign            |
| rs2071308 | NP_002356 | R | H | RH | benign            |
| rs2071309 | NP_002356 | I | T | IT | benign            |
| rs2071312 | NP_570711 | A | T | AT | benign            |
| rs2071312 | NP_570716 | A | T | AT | benign            |
| rs2071315 | NP_005174 | Q | K | QK | benign            |
| rs2071421 | NP_000478 | N | S | NS | benign            |
| rs2071448 | NP_061826 | A | V | AV | benign            |
| rs2071478 | NP_002111 | V | G | VG | possibly damaging |
| rs2071496 | NP_002408 | T | S | TS | benign            |
| rs2071529 | NP_002499 | R | L | RL | possibly damaging |
| rs2071543 | NP_683720 | K | Q | KQ | benign            |
| rs2071554 | NP_002111 | R | Q | RQ | benign            |
| rs2071555 | NP_002109 | A | E | AE | benign            |
| rs2071560 | NP_002269 | I | T | IT | possibly damaging |
| rs2071561 | NP_002269 | S | Y | SY | probably damaging |
| rs2071563 | NP_002269 | T | M | TM | probably damaging |
| rs2071587 | NP_003584 | R | C | RC | benign            |
| rs2071588 | NP_002272 | G | R | GR | possibly damaging |
| rs2071599 | NP_066293 | H | R | HR | benign            |
| rs2071601 | NP_002271 | P | A | PA | possibly damaging |
| rs2071607 | NP_003761 | A | D | AD | benign            |
| rs2071650 | NP_002999 | G | R | GR | possibly damaging |
| rs2071699 | NP_000139 | A | V | AV | benign            |
| rs2071747 | NP_002124 | D | H | DH | benign            |
| rs2071756 | NP_008983 | R | H | RH | benign            |
| rs2071756 | NP_039249 | R | H | RH | possibly damaging |
| rs2071762 | NP_851851 | P | L | PL | possibly damaging |
| rs2071762 | NP_851852 | P | L | PL | probably damaging |
| rs2071800 | NP_064440 | G | D | GD | benign            |
| rs2071848 | NP_938011 | S | T | ST | benign            |
| rs2071883 | NP_620169 | L | F | LF | benign            |
| rs2071888 | NP_003181 | T | R | TR | benign            |
| rs2071888 | NP_757346 | T | R | TR | benign            |
| rs2071888 | NP_757345 | T | R | TR | benign            |
| rs2071913 | NP_055315 | G | A | GA | benign            |
| rs2071915 | NP_067082 | V | I | VI | benign            |
| rs2071921 | NP_060887 | V | I | VI | benign            |
| rs2071979 | NP_004195 | T | A | TA | benign            |
| rs2071979 | NP_683721 | T | A | TA | benign            |
| rs2072032 | XP_040527 | R | G | RG | possibly damaging |
| rs2072036 | XP_040527 | A | V | AV | benign            |
| rs2072086 | NP_057725 | R | Q | RQ | benign            |
| rs2072123 | NP_005128 | V | A | VA | benign            |
| rs2072129 | NP_004280 | V | E | VE | benign            |



|           |           |   |   |    |                   |
|-----------|-----------|---|---|----|-------------------|
| rs2072145 | NP_004749 | Q | R | QR | benign            |
| rs2072147 | NP_004749 | A | T | AT | benign            |
| rs2072163 | XP_376680 | V | G | VG | possibly damaging |
| rs2072164 | NP_036501 | R | C | RC | probably damaging |
| rs2072165 | NP_036501 | H | R | HR | probably damaging |
| rs2072174 | NP_775810 | V | G | VG | possibly damaging |
| rs2072193 | NP_056530 | S | R | SR | benign            |
| rs2072273 | NP_659205 | R | Q | RQ | benign            |
| rs2072273 | NP_659206 | R | Q | RQ | benign            |
| rs2072273 | NP_006790 | R | Q | RQ | benign            |
| rs2072276 | NP_665736 | T | A | TA | benign            |
| rs2072276 | NP_005255 | T | A | TA | benign            |
| rs2072285 | NP_002775 | H | R | HR | benign            |
| rs2072315 | NP_061743 | E | G | EG | benign            |
| rs2072315 | NP_114476 | E | G | EG | possibly damaging |
| rs2072355 | NP_006413 | G | E | GE | probably damaging |
| rs2072357 | NP_006413 | S | L | SL | benign            |
| rs2072394 | NP_056494 | V | L | VL | benign            |
| rs2072446 | NP_002498 | S | L | SL | possibly damaging |
| rs2072452 | NP_036201 | V | A | VA | benign            |
| rs2072493 | NP_003259 | N | S | NS | benign            |
| rs2072501 | NP_067039 | V | I | VI | benign            |
| rs2072525 | NP_444506 | L | I | LI | benign            |
| rs2072526 | NP_444506 | K | R | KR | benign            |
| rs2072579 | NP_055521 | D | E | DE | benign            |
| rs2072596 | NP_006554 | F | L | FL | benign            |
| rs2072597 | NP_006554 | S | P | SP | possibly damaging |
| rs2072648 | NP_937995 | R | H | RH | benign            |
| rs2072648 | NP_006580 | R | H | RH | benign            |
| rs2072663 | NP_005743 | Q | K | QK | benign            |
| rs2072671 | NP_001776 | K | Q | KQ | benign            |
| rs2072767 | NP_061847 | V | I | VI | benign            |
| rs2072770 | NP_056468 | R | Q | RQ | benign            |
| rs2072788 | NP_003824 | R | S | RS | benign            |
| rs2072788 | NP_085080 | R | S | RS | benign            |
| rs2072788 | NP_085095 | R | S | RS | benign            |
| rs2072797 | NP_056189 | G | S | GS | benign            |
| rs2072799 | NP_056189 | T | A | TA | benign            |
| rs2072923 | NP_878258 | R | W | RW | possibly damaging |
| rs2072985 | NP_006029 | L | F | LF | benign            |
| rs2072993 | XP_052561 | G | A | GA | benign            |
| rs2072994 | XP_052561 | A | T | AT | benign            |
| rs2073151 | NP_039224 | V | I | VI | benign            |
| rs2073152 | NP_039224 | S | C | SC | benign            |
| rs2073153 | NP_039224 | L | R | LR | probably damaging |
| rs2073154 | NP_039224 | F | L | FL | benign            |

|           |           |   |   |    |                   |
|-----------|-----------|---|---|----|-------------------|
| rs2073201 | XP_059318 | R | K | RK | benign            |
| rs2073260 | NP_036309 | Q | E | QE | benign            |
| rs2073290 | XP_046437 | H | Q | HQ | possibly damaging |
| rs2073342 | NP_002926 | T | R | TR | benign            |
| rs2073347 | NP_057434 | E | G | EG | possibly damaging |
| rs2073347 | NP_065972 | E | G | EG | possibly damaging |
| rs2073347 | NP_891989 | E | G | EG | possibly damaging |
| rs2073347 | NP_891990 | E | G | EG | possibly damaging |
| rs2073347 | NP_891991 | E | G | EG | possibly damaging |
| rs2073376 | NP_006022 | Q | R | QR | benign            |
| rs2073380 | NP_006022 | R | S | RS | benign            |
| rs2073405 | XP_496593 | H | N | HN | benign            |
| rs2073440 | NP_002103 | E | D | ED | benign            |
| rs2073478 | NP_000683 | R | L | RL | probably damaging |
| rs2073498 | NP_009113 | A | S | AS | benign            |
| rs2073498 | NP_733831 | A | S | AS | benign            |
| rs2073498 | NP_733833 | A | S | AS | benign            |
| rs2073498 | NP_733832 | A | S | AS | benign            |
| rs2073601 | NP_005060 | L | M | LM | benign            |
| rs2073601 | NP_033664 | M | L | ML | benign            |
| rs2073618 | NP_002537 | K | N | KN | benign            |
| rs2073634 | NP_085118 | A | T | AT | benign            |
| rs2073634 | NP_005346 | A | T | AT | benign            |
| rs2073711 | NP_003604 | T | I | TI | possibly damaging |
| rs2073713 | NP_031363 | R | C | RC | possibly damaging |
| rs2073713 | NP_005097 | R | C | RC | possibly damaging |
| rs2073714 | NP_004794 | K | E | KE | benign            |
| rs2073720 | NP_061925 | K | R | KR | benign            |
| rs2073748 | NP_001661 | P | L | PL | probably damaging |
| rs2073749 | NP_001661 | T | M | TM | benign            |
| rs2073770 | NP_443730 | W | G | WG | benign            |
| rs2073793 | XP_374489 | F | S | FS | probably damaging |
| rs2073817 | NP_009032 | R | H | RH | benign            |
| rs2073852 | NP_008816 | E | Q | EQ | benign            |
| rs2073924 | NP_068836 | L | F | LF | benign            |
| rs2073942 | NP_001640 | L | F | LF | benign            |
| rs2074000 | XP_377933 | Q | K | QK | benign            |
| rs2074005 | NP_997236 | V | I | VI | benign            |
| rs2074036 | XP_375305 | A | V | AV | benign            |
| rs2074051 | XP_372375 | C | R | CR | possibly damaging |
| rs2074059 | XP_375663 | M | L | ML | benign            |
| rs2074060 | XP_375663 | C | W | CW | probably damaging |
| rs2074076 | NP_078967 | Q | E | QE | benign            |
| rs2074077 | NP_078967 | V | I | VI | benign            |
| rs2074078 | NP_003435 | G | V | GV | benign            |
| rs2074158 | NP_077024 | Q | R | QR | benign            |

|           |           |   |   |    |                   |
|-----------|-----------|---|---|----|-------------------|
| rs2074160 | NP_077024 | R | Q | RQ | benign            |
| rs2074180 | NP_787078 | H | N | HN | possibly damaging |
| rs2074182 | XP_496237 | L | R | LR | possibly damaging |
| rs2074225 | NP_006716 | V | A | VA | benign            |
| rs2074233 | NP_006716 | G | S | GS | benign            |
| rs2074379 | NP_079420 | I | M | IM | benign            |
| rs2074380 | NP_079420 | G | S | GS | possibly damaging |
| rs2074381 | NP_079420 | N | D | ND | benign            |
| rs2074383 | XP_208319 | P | A | PA | possibly damaging |
| rs2074384 | XP_208319 | V | I | VI | benign            |
| rs2074388 | NP_079420 | D | G | DG | benign            |
| rs2074406 | NP_006169 | V | M | VM | benign            |
| rs2074435 | XP_496306 | Q | L | QL | benign            |
| rs2074442 | NP_036424 | E | D | ED | benign            |
| rs2074464 | XP_498078 | M | V | MV | possibly damaging |
| rs2074466 | XP_498078 | P | Q | PQ | benign            |
| rs2074467 | XP_498078 | F | L | FL | benign            |
| rs2074468 | XP_498078 | P | S | PS | benign            |
| rs2074469 | XP_498078 | F | L | FL | possibly damaging |
| rs2074479 | NP_739575 | S | P | SP | benign            |
| rs2074479 | NP_079512 | S | P | SP | benign            |
| rs2074506 | XP_373419 | V | L | VL | benign            |
| rs2074599 | XP_371877 | F | L | FL | benign            |
| rs2074654 | NP_005847 | W | R | WR | probably damaging |
| rs2074689 | XP_376720 | M | T | MT | possibly damaging |
| rs2074704 | XP_376720 | P | R | PR | benign            |
| rs2074708 | NP_775808 | A | V | AV | benign            |
| rs2074708 | XP_371925 | V | A | VA | benign            |
| rs2074718 | NP_775810 | T | K | TK | benign            |
| rs2074734 | NP_056530 | E | Q | EQ | benign            |
| rs2074735 | NP_056530 | L | V | LV | benign            |
| rs2074845 | NP_008836 | T | A | TA | benign            |
| rs2074858 | XP_375660 | R | T | RT | benign            |
| rs2074876 | NP_003793 | E | D | ED | benign            |
| rs2074877 | NP_003793 | M | V | MV | probably damaging |
| rs2074888 | NP_003191 | A | V | AV | benign            |
| rs2074890 | NP_006461 | E | D | ED | benign            |
| rs2074912 | NP_115783 | D | G | DG | benign            |
| rs2074912 | NP_061752 | D | G | DG | benign            |
| rs2074923 | NP_002775 | Q | L | QL | benign            |
| rs2074930 | NP_872286 | D | V | DV | possibly damaging |
| rs2074930 | NP_872282 | D | V | DV | possibly damaging |
| rs2075015 | XP_376479 | E | K | EK | benign            |
| rs2075020 | XP_375550 | V | A | VA | benign            |
| rs2075033 | NP_775864 | G | S | GS | benign            |
| rs2075161 | NP_056474 | I | L | IL | benign            |

|           |           |   |   |    |                   |
|-----------|-----------|---|---|----|-------------------|
| rs2075164 | NP_071762 | R | Q | RQ | benign            |
| rs2075221 | NP_775806 | R | Q | RQ | benign            |
| rs2075252 | NP_004516 | K | E | KE | benign            |
| rs2075291 | NP_443200 | G | C | GC | possibly damaging |
| rs2075322 | NP_085911 | E | Q | EQ | benign            |
| rs2075352 | XP_376203 | P | L | PL | benign            |
| rs2075387 | NP_057280 | Q | R | QR | possibly damaging |
| rs2075469 | NP_631909 | C | R | CR | possibly damaging |
| rs2075472 | XP_375603 | P | L | PL | probably damaging |
| rs2075520 | NP_003451 | G | V | GV | probably damaging |
| rs2075563 | NP_061978 | E | K | EK | benign            |
| rs2075639 | NP_002696 | A | V | AV | benign            |
| rs2075662 | NP_001846 | R | H | RH | benign            |
| rs2075684 | NP_002107 | F | Y | FY | benign            |
| rs2075690 | NP_002767 | L | P | LP | possibly damaging |
| rs2075690 | NP_665895 | L | P | LP | possibly damaging |
| rs2075732 | NP_703144 | R | W | RW | benign            |
| rs2075740 | NP_005407 | T | M | TM | benign            |
| rs2075756 | NP_003293 | V | I | VI | benign            |
| rs2075761 | NP_006673 | G | E | GE | benign            |
| rs2075769 | NP_002246 | P | L | PL | benign            |
| rs2075773 | NP_056120 | F | C | FC | possibly damaging |
| rs2075789 | NP_079535 | P | S | PS | possibly damaging |
| rs2075789 | NP_751898 | P | S | PS | possibly damaging |
| rs2075789 | NP_751897 | P | S | PS | possibly damaging |
| rs2075798 | NP_116183 | R | L | RL | benign            |
| rs2075798 | NP_079533 | R | L | RL | benign            |
| rs2075800 | NP_005518 | E | K | EK | benign            |
| rs2075803 | NP_055256 | K | E | KE | benign            |
| rs2075820 | NP_006083 | E | K | EK | benign            |
| rs2075960 | XP_114158 | S | A | SA | benign            |
| rs2076015 | NP_066979 | G | R | GR | benign            |
| rs2076051 | NP_777592 | V | A | VA | benign            |
| rs2076063 | XP_291395 | V | D | VD | probably damaging |
| rs2076101 | NP_660341 | V | I | VI | benign            |
| rs2076109 | NP_004891 | K | E | KE | benign            |
| rs2076110 | NP_004891 | P | L | PL | benign            |
| rs2076185 | NP_116133 | V | I | VI | benign            |
| rs2076212 | NP_079501 | G | C | GC | benign            |
| rs2076213 | NP_079501 | C | G | CG | benign            |
| rs2076222 | NP_000219 | A | D | AD | possibly damaging |
| rs2076299 | NP_004406 | Y | C | YC | probably damaging |
| rs2076324 | NP_036363 | D | E | DE | benign            |
| rs2076324 | NP_056950 | D | E | DE | benign            |
| rs2076349 | NP_000219 | V | M | VM | benign            |
| rs2076371 | NP_037488 | A | V | AV | benign            |

|           |           |   |   |    |                   |
|-----------|-----------|---|---|----|-------------------|
| rs2076405 | NP_945345 | V | M | VM | benign            |
| rs2076472 | NP_006780 | I | T | IT | benign            |
| rs2076484 | NP_006389 | L | S | LS | benign            |
| rs2076485 | NP_006389 | I | T | IT | benign            |
| rs2076486 | NP_006389 | S | P | SP | benign            |
| rs2076487 | NP_006389 | A | G | AG | benign            |
| rs2076489 | NP_068703 | F | L | FL | benign            |
| rs2076489 | NP_068704 | F | L | FL | benign            |
| rs2076489 | NP_001461 | F | L | FL | benign            |
| rs2076506 | NP_612641 | T | M | TM | possibly damaging |
| rs2076523 | NP_062548 | K | E | KE | benign            |
| rs2076530 | NP_062548 | S | G | SG | benign            |
| rs2076671 | NP_085145 | T | M | TM | benign            |
| rs2076672 | NP_085145 | T | M | TM | benign            |
| rs2076673 | NP_085145 | S | C | SC | benign            |
| rs2076742 | NP_077816 | W | C | WC | possibly damaging |
| rs2076744 | NP_077816 | A | T | AT | benign            |
| rs2076745 | NP_077816 | I | V | IV | benign            |
| rs2076746 | NP_077816 | V | M | VM | benign            |
| rs2076754 | NP_071445 | A | V | AV | benign            |
| rs2076817 | XP_372191 | A | V | AV | benign            |
| rs2076955 | NP_056355 | A | V | AV | benign            |
| rs2077181 | XP_041018 | Q | E | QE | benign            |
| rs2077257 | XP_498369 | Y | H | YH | benign            |
| rs2077268 | NP_001027 | V | I | VI | benign            |
| rs2078266 | NP_055626 | N | D | ND | benign            |
| rs2079451 | NP_000159 | S | C | SC | possibly damaging |
| rs2079772 | NP_653272 | A | D | AD | benign            |
| rs2079773 | NP_653272 | Q | P | QP | benign            |
| rs2080391 | NP_056532 | A | P | AP | benign            |
| rs2081152 | NP_057422 | Y | F | YF | benign            |
| rs2081447 | NP_660093 | V | G | VG | possibly damaging |
| rs2081447 | NP_892009 | V | G | VG | possibly damaging |
| rs2081744 | NP_071898 | P | A | PA | possibly damaging |
| rs2082416 | XP_371167 | L | M | LM | benign            |
| rs2083543 | XP_208766 | D | E | DE | benign            |
| rs2083837 | NP_073149 | A | S | AS | benign            |
| rs2083914 | NP_078872 | R | I | RI | probably damaging |
| rs2084716 | XP_497834 | G | R | GR | possibly damaging |
| rs2084719 | NP_006058 | K | N | KN | benign            |
| rs2085329 | NP_115958 | Q | H | QH | benign            |
| rs2086234 | NP_958728 | L | R | LR | benign            |
| rs2086310 | NP_620687 | A | P | AP | benign            |
| rs2087732 | NP_066278 | A | G | AG | benign            |
| rs2087733 | NP_066278 | P | L | PL | benign            |
| rs2088305 | NP_940986 | L | F | LF | benign            |

|           |           |   |   |    |                   |
|-----------|-----------|---|---|----|-------------------|
| rs2088306 | NP_940986 | S | F | SF | probably damaging |
| rs2089891 | NP_116222 | E | G | EG | possibly damaging |
| rs2090625 | NP_001597 | F | V | FV | possibly damaging |
| rs2090625 | NP_997698 | F | V | FV | possibly damaging |
| rs2093066 | NP_872599 | T | M | TM | benign            |
| rs2096045 | XP_496332 | A | T | AT | benign            |
| rs2096047 | XP_496332 | E | K | EK | benign            |
| rs2097820 | NP_055048 | S | W | SW | possibly damaging |
| rs2098386 | NP_005751 | V | I | VI | benign            |
| rs2098691 | NP_055548 | Y | F | YF | benign            |
| rs2099049 | XP_292832 | S | L | SL | benign            |
| rs2099104 | NP_003110 | S | T | ST | benign            |
| rs2100606 | NP_056498 | K | N | KN | possibly damaging |
| rs2101624 | XP_372763 | D | E | DE | benign            |
| rs2101625 | XP_372763 | S | F | SF | benign            |
| rs2101711 | NP_775884 | A | T | AT | benign            |
| rs2101919 | NP_031387 | G | D | GD | possibly damaging |
| rs2103819 | XP_498321 | K | N | KN | benign            |
| rs2104772 | NP_002151 | L | I | LI | benign            |
| rs2104978 | NP_009041 | H | R | HR | possibly damaging |
| rs2105243 | XP_377644 | G | E | GE | benign            |
| rs2105243 | XP_291645 | G | E | GE | possibly damaging |
| rs2105633 | NP_006380 | I | S | IS | possibly damaging |
| rs2106347 | NP_000359 | D | Y | DY | probably damaging |
| rs2106542 | NP_005437 | C | S | CS | probably damaging |
| rs2106673 | NP_006113 | Q | R | QR | benign            |
| rs2107731 | XP_370765 | L | V | LV | benign            |
| rs2107732 | NP_113631 | V | I | VI | benign            |
| rs2107737 | XP_291223 | R | Q | RQ | benign            |
| rs2107819 | NP_061976 | K | Q | KQ | benign            |
| rs2108433 | NP_055721 | L | F | LF | benign            |
| rs2108485 | XP_059482 | A | S | AS | benign            |
| rs2108622 | NP_001073 | V | M | VM | benign            |
| rs2108777 | XP_498241 | Q | E | QE | benign            |
| rs2108778 | XP_498241 | I | V | IV | benign            |
| rs2108978 | NP_009133 | R | H | RH | probably damaging |
| rs2111119 | XP_051197 | G | S | GS | benign            |
| rs2111543 | NP_848639 | R | T | RT | benign            |
| rs2111544 | NP_848639 | A | V | AV | benign            |
| rs2112717 | NP_071448 | E | K | EK | benign            |
| rs2112782 | NP_055309 | E | K | EK | benign            |
| rs2112811 | XP_292504 | L | F | LF | benign            |
| rs2113947 | NP_002411 | E | K | EK | benign            |
| rs2114664 | NP_055455 | R | H | RH | possibly damaging |
| rs2115108 | NP_079337 | M | T | MT | benign            |
| rs2115480 | NP_570969 | V | I | VI | benign            |

|           |           |   |   |    |                   |
|-----------|-----------|---|---|----|-------------------|
| rs2116665 | NP_000399 | H | R | HR | benign            |
| rs2118388 | NP_056097 | A | V | AV | benign            |
| rs2118548 | NP_078796 | L | I | LI | benign            |
| rs2118760 | XP_209554 | D | E | DE | benign            |
| rs2120353 | NP_954697 | A | G | AG | benign            |
| rs2121816 | XP_031246 | G | E | GE | probably damaging |
| rs2122421 | XP_495809 | L | M | LM | benign            |
| rs2123118 | NP_005750 | N | D | ND | benign            |
| rs2123465 | NP_060621 | V | M | VM | benign            |
| rs2125579 | NP_004225 | H | P | HP | probably damaging |
| rs2125739 | NP_258261 | I | T | IT | benign            |
| rs2126533 | NP_001097 | W | R | WR | probably damaging |
| rs2126720 | NP_005986 | A | D | AD | benign            |
| rs2126778 | XP_375313 | W | R | WR | probably damaging |
| rs2126779 | XP_375313 | V | A | VA | benign            |
| rs2127679 | NP_000584 | A | V | AV | benign            |
| rs2127815 | XP_038291 | T | K | TK | benign            |
| rs2127898 | NP_055087 | T | M | TM | benign            |
| rs2128574 | XP_498803 | Q | P | QP | benign            |
| rs2128574 | XP_498806 | Q | P | QP | benign            |
| rs2128600 | NP_003671 | Q | H | QH | probably damaging |
| rs2128647 | XP_034086 | H | R | HR | probably damaging |
| rs2130145 | XP_037817 | C | R | CR | probably damaging |
| rs2130262 | NP_149062 | E | K | EK | benign            |
| rs2130262 | NP_892006 | E | K | EK | benign            |
| rs2130882 | NP_899232 | P | S | PS | possibly damaging |
| rs2131100 | NP_443728 | Q | H | QH | possibly damaging |
| rs2131107 | NP_004384 | W | S | WS | probably damaging |
| rs2131901 | NP_056655 | S | C | SC | benign            |
| rs2131901 | NP_056656 | S | C | SC | benign            |
| rs2131901 | NP_001102 | S | C | SC | benign            |
| rs2133173 | NP_689878 | I | L | IL | benign            |
| rs2133305 | XP_051091 | D | N | DN | benign            |
| rs2133788 | NP_569075 | D | V | DV | probably damaging |
| rs2133788 | NP_569076 | D | V | DV | probably damaging |
| rs2133788 | NP_569077 | D | V | DV | probably damaging |
| rs2133788 | NP_002830 | D | V | DV | probably damaging |
| rs2134185 | NP_001323 | Y | N | YN | probably damaging |
| rs2134301 | XP_495896 | N | I | NI | probably damaging |
| rs2134510 | NP_009209 | V | A | VA | benign            |
| rs2134689 | NP_031374 | E | Q | EQ | benign            |
| rs2135720 | NP_149045 | R | Q | RQ | benign            |
| rs2136373 | NP_056109 | Q | H | QH | possibly damaging |
| rs2137484 | XP_496268 | P | R | PR | probably damaging |
| rs2137623 | NP_003558 | T | I | TI | benign            |
| rs2137722 | NP_127499 | R | C | RC | benign            |

|           |           |   |   |    |                   |
|-----------|-----------|---|---|----|-------------------|
| rs2137722 | NP_127500 | R | C | RC | possibly damaging |
| rs2137722 | NP_055737 | R | C | RC | possibly damaging |
| rs2137722 | NP_127497 | R | C | RC | possibly damaging |
| rs2137841 | NP_000111 | H | Q | HQ | probably damaging |
| rs2139542 | NP_060669 | V | G | VG | probably damaging |
| rs2140516 | NP_071889 | N | S | NS | benign            |
| rs2140597 | XP_497281 | R | W | RW | possibly damaging |
| rs2141311 | XP_496576 | R | G | RG | possibly damaging |
| rs2142091 | NP_071417 | V | M | VM | benign            |
| rs2142092 | NP_071417 | D | N | DN | benign            |
| rs2142477 | NP_073209 | P | R | PR | probably damaging |
| rs2142661 | NP_056468 | R | C | RC | benign            |
| rs2143598 | NP_073721 | E | A | EA | possibly damaging |
| rs2143598 | NP_003942 | E | A | EA | possibly damaging |
| rs2145412 | NP_001276 | F | L | FL | probably damaging |
| rs2145692 | NP_942094 | S | T | ST | benign            |
| rs2145693 | NP_942094 | S | Y | SY | benign            |
| rs2146315 | NP_078779 | V | I | VI | benign            |
| rs2147377 | NP_056108 | V | F | VF | benign            |
| rs2147377 | NP_149062 | F | V | FV | possibly damaging |
| rs2147377 | NP_892006 | V | F | VF | possibly damaging |
| rs2147439 | NP_694988 | E | K | EK | benign            |
| rs2147896 | NP_116098 | T | M | TM | possibly damaging |
| rs2147914 | NP_060291 | L | M | LM | benign            |
| rs2148136 | NP_001995 | I | V | IV | benign            |
| rs2148493 | XP_497249 | S | N | SN | benign            |
| rs2148578 | XP_371731 | Q | H | QH | probably damaging |
| rs2149989 | NP_006186 | S | Y | SY | benign            |
| rs2150283 | XP_371956 | D | N | DN | benign            |
| rs2151910 | NP_631904 | Y | N | YN | benign            |
| rs2152051 | NP_871001 | L | S | LS | benign            |
| rs2152099 | XP_370541 | R | K | RK | benign            |
| rs2152143 | NP_002408 | G | S | GS | benign            |
| rs2153358 | XP_291625 | K | T | KT | benign            |
| rs2153358 | XP_291638 | K | T | KT | benign            |
| rs2154028 | NP_006166 | V | A | VA | benign            |
| rs2154028 | NP_932326 | V | A | VA | benign            |
| rs2155587 | NP_443164 | V | M | VM | benign            |
| rs2156710 | NP_004696 | F | V | FV | probably damaging |
| rs2156711 | NP_004696 | D | Y | DY | possibly damaging |
| rs2156928 | NP_076493 | Y | D | YD | probably damaging |
| rs2156928 | NP_000416 | Y | D | YD | probably damaging |
| rs2157680 | NP_002107 | K | N | KN | benign            |
| rs2158367 | NP_077005 | T | A | TA | benign            |
| rs2158692 | NP_079186 | H | R | HR | possibly damaging |
| rs2159258 | NP_114475 | Q | R | QR | benign            |



|           |           |   |   |    |                   |
|-----------|-----------|---|---|----|-------------------|
| rs2159258 | NP_061742 | Q | R | QR | benign            |
| rs2159261 | NP_062558 | D | A | DA | possibly damaging |
| rs2159439 | NP_757344 | A | D | AD | benign            |
| rs2159439 | NP_757343 | A | D | AD | benign            |
| rs2159903 | NP_076406 | P | L | PL | probably damaging |
| rs2159940 | NP_660330 | E | K | EK | benign            |
| rs2160780 | NP_055312 | T | P | TP | benign            |
| rs2161344 | NP_938080 | R | W | RW | probably damaging |
| rs2162321 | XP_113743 | A | T | AT | benign            |
| rs2162771 | NP_000199 | P | L | PL | benign            |
| rs2162986 | NP_981951 | A | T | AT | benign            |
| rs2163204 | NP_000375 | N | H | NH | benign            |
| rs2163496 | NP_443728 | V | E | VE | possibly damaging |
| rs2163649 | NP_079029 | L | F | LF | benign            |
| rs2164559 | NP_001938 | G | S | GS | possibly damaging |
| rs2164675 | NP_005487 | E | D | ED | benign            |
| rs2164791 | XP_371575 | Y | C | YC | probably damaging |
| rs2165627 | NP_002828 | D | E | DE | benign            |
| rs2165678 | XP_057040 | E | K | EK | benign            |
| rs2166071 | NP_065924 | G | R | GR | probably damaging |
| rs2166387 | XP_377896 | K | Q | KQ | benign            |
| rs2166589 | NP_008954 | S | F | SF | possibly damaging |
| rs2167079 | NP_001601 | R | Q | RQ | benign            |
| rs2168538 | NP_004704 | S | C | SC | possibly damaging |
| rs2168749 | NP_006602 | V | I | VI | benign            |
| rs2168854 | NP_076977 | A | V | AV | benign            |
| rs2169710 | NP_689787 | R | S | RS | benign            |
| rs2170363 | NP_859053 | R | G | RG | benign            |
| rs2170562 | NP_055754 | R | H | RH | benign            |
| rs2170814 | NP_060183 | G | R | GR | possibly damaging |
| rs2171492 | NP_057436 | G | C | GC | benign            |
| rs2171509 | NP_620385 | K | R | KR | benign            |
| rs2171509 | NP_620386 | K | R | KR | benign            |
| rs2171509 | NP_740750 | K | R | KR | benign            |
| rs2171509 | NP_620161 | K | R | KR | benign            |
| rs2172257 | NP_116167 | A | T | AT | benign            |
| rs2172397 | NP_000149 | V | I | VI | benign            |
| rs2172521 | NP_006567 | E | K | EK | benign            |
| rs2172826 | NP_004439 | P | R | PR | probably damaging |
| rs2173045 | NP_940986 | S | F | SF | probably damaging |
| rs2173105 | XP_371837 | Q | R | QR | possibly damaging |
| rs2173904 | NP_055693 | R | P | RP | possibly damaging |
| rs2173970 | XP_495940 | V | L | VL | benign            |
| rs2175563 | NP_004353 | V | I | VI | benign            |
| rs2175968 | NP_997286 | M | T | MT | benign            |
| rs2175977 | NP_000538 | S | T | ST | benign            |

|           |           |   |   |    |                   |
|-----------|-----------|---|---|----|-------------------|
| rs2175977 | NP_783650 | S | T | ST | benign            |
| rs2175977 | NP_783651 | S | T | ST | benign            |
| rs2175977 | NP_783652 | S | T | ST | benign            |
| rs2175998 | XP_061880 | D | N | DN | benign            |
| rs2177528 | XP_376622 | Q | R | QR | benign            |
| rs2177535 | XP_497281 | S | R | SR | benign            |
| rs2177710 | NP_055534 | R | C | RC | possibly damaging |
| rs2178004 | XP_031689 | T | S | TS | benign            |
| rs2178403 | NP_004944 | M | V | MV | benign            |
| rs2178403 | NP_886553 | M | V | MV | benign            |
| rs2178403 | NP_937884 | M | V | MV | benign            |
| rs2178403 | NP_937885 | M | V | MV | benign            |
| rs2178403 | NP_937887 | M | V | MV | benign            |
| rs2179675 | NP_085142 | S | G | SG | benign            |
| rs2180314 | NP_000837 | T | S | TS | benign            |
| rs2180398 | NP_478144 | E | Q | EQ | benign            |
| rs2180491 | XP_379639 | Q | H | QH | benign            |
| rs2180491 | XP_499140 | Q | H | QH | benign            |
| rs2180657 | NP_068598 | Y | C | YC | probably damaging |
| rs2180792 | NP_002678 | S | T | ST | benign            |
| rs2181170 | XP_496006 | W | R | WR | probably damaging |
| rs2181280 | NP_078779 | L | H | LH | possibly damaging |
| rs2181675 | NP_060163 | A | V | AV | benign            |
| rs2183071 | NP_001695 | E | Q | EQ | benign            |
| rs2183573 | NP_061836 | S | P | SP | benign            |
| rs2183573 | NP_387505 | S | P | SP | benign            |
| rs2184884 | NP_857594 | H | N | HN | possibly damaging |
| rs2184953 | XP_048104 | Y | H | YH | benign            |
| rs2185379 | NP_001189 | G | S | GS | benign            |
| rs2185639 | NP_055263 | Y | H | YH | probably damaging |
| rs2185724 | XP_166132 | R | G | RG | benign            |
| rs2185913 | NP_006166 | Y | C | YC | probably damaging |
| rs2185913 | NP_932326 | Y | C | YC | probably damaging |
| rs2186564 | NP_078960 | V | M | VM | benign            |
| rs2186797 | NP_060513 | F | S | FS | possibly damaging |
| rs2187016 | NP_689841 | H | D | HD | benign            |
| rs2187094 | NP_079057 | K | R | KR | benign            |
| rs2187601 | NP_002015 | A | P | AP | benign            |
| rs2188736 | NP_003435 | L | V | LV | benign            |
| rs2189335 | NP_115684 | N | K | NK | benign            |
| rs2189473 | NP_055769 | Q | H | QH | possibly damaging |
| rs2190209 | XP_208373 | S | P | SP | benign            |
| rs2190729 | NP_003793 | G | R | GR | probably damaging |
| rs2191432 | NP_006201 | A | T | AT | benign            |
| rs2192828 | XP_371878 | F | C | FC | probably damaging |
| rs2193430 | NP_443132 | V | L | VL | benign            |

|           |           |   |   |    |                   |
|-----------|-----------|---|---|----|-------------------|
| rs2193430 | NP_937756 | V | L | VL | benign            |
| rs2193430 | NP_937757 | V | L | VL | benign            |
| rs2193587 | NP_001337 | K | R | KR | benign            |
| rs2193595 | XP_370769 | K | E | KE | benign            |
| rs2194816 | NP_003613 | V | L | VL | benign            |
| rs2194816 | NP_803193 | V | L | VL | benign            |
| rs2195310 | NP_115973 | D | N | DN | benign            |
| rs2195951 | XP_064883 | Y | C | YC | benign            |
| rs2195980 | XP_371174 | T | I | TI | benign            |
| rs2196862 | NP_000419 | P | S | PS | probably damaging |
| rs2197514 | NP_777574 | Y | N | YN | probably damaging |
| rs2199619 | XP_371487 | A | V | AV | benign            |
| rs2202683 | NP_061134 | V | I | VI | benign            |
| rs2203504 | XP_377797 | A | G | AG | possibly damaging |
| rs2205204 | XP_086761 | R | T | RT | benign            |
| rs2205446 | NP_037372 | R | K | RK | benign            |
| rs2205446 | NP_877426 | R | K | RK | benign            |
| rs2205447 | NP_037372 | R | K | RK | benign            |
| rs2205447 | NP_877426 | R | K | RK | benign            |
| rs2208592 | NP_079460 | S | Y | SY | benign            |
| rs2213591 | NP_055068 | M | T | MT | benign            |
| rs2213616 | NP_068557 | R | K | RK | benign            |
| rs2213978 | NP_008816 | A | S | AS | benign            |
| rs2217332 | NP_055500 | R | H | RH | benign            |
| rs2217401 | NP_114144 | I | L | IL | benign            |
| rs2217652 | NP_003442 | M | T | MT | benign            |
| rs2217657 | XP_064883 | W | C | WC | possibly damaging |
| rs2219078 | XP_497863 | G | R | GR | probably damaging |
| rs2219594 | NP_000050 | H | N | HN | probably damaging |
| rs2219898 | NP_443132 | I | M | IM | benign            |
| rs2220247 | NP_444284 | A | S | AS | benign            |
| rs2224252 | NP_006652 | R | K | RK | benign            |
| rs2224391 | NP_065141 | S | A | SA | benign            |
| rs2226548 | NP_853631 | A | T | AT | benign            |
| rs2227249 | NP_872580 | A | T | AT | benign            |
| rs2227249 | NP_067021 | A | T | AT | benign            |
| rs2227264 | NP_061853 | S | I | SI | benign            |
| rs2227271 | NP_059509 | R | Q | RQ | benign            |
| rs2227275 | NP_003824 | G | S | GS | benign            |
| rs2227275 | NP_085095 | G | S | GS | benign            |
| rs2227275 | NP_085080 | G | S | GS | possibly damaging |
| rs2227278 | NP_055198 | R | S | RS | benign            |
| rs2227279 | NP_000614 | G | E | GE | possibly damaging |
| rs2227291 | NP_000043 | V | L | VL | benign            |
| rs2227297 | NP_002591 | S | C | SC | possibly damaging |
| rs2227310 | NP_203124 | D | E | DE | benign            |

|           |           |   |   |    |                   |
|-----------|-----------|---|---|----|-------------------|
| rs2227310 | NP_203125 | D | E | DE | benign            |
| rs2227329 | NP_757373 | L | M | LM | benign            |
| rs2227329 | NP_000750 | L | M | LM | benign            |
| rs2227329 | NP_757374 | L | M | LM | benign            |
| rs2227330 | NP_757373 | A | T | AT | benign            |
| rs2227330 | NP_000750 | A | T | AT | benign            |
| rs2227330 | NP_757374 | A | T | AT | benign            |
| rs2227346 | NP_003941 | F | V | FV | possibly damaging |
| rs2227376 | NP_003941 | P | L | PL | probably damaging |
| rs2227409 | NP_005132 | N | H | NH | benign            |
| rs2227434 | NP_005132 | P | S | PS | benign            |
| rs2227507 | NP_065386 | S | G | SG | benign            |
| rs2227564 | NP_002649 | P | L | PL | possibly damaging |
| rs2227567 | NP_002649 | K | Q | KQ | benign            |
| rs2227606 | NP_000479 | T | A | TA | probably damaging |
| rs2227624 | NP_000479 | V | E | VE | benign            |
| rs2227647 | NP_000593 | H | P | HP | benign            |
| rs2227669 | NP_000593 | R | H | RH | benign            |
| rs2227685 | NP_000593 | T | N | TN | benign            |
| rs2227723 | NP_000629 | R | Q | RQ | benign            |
| rs2227741 | NP_000629 | A | S | AS | benign            |
| rs2227799 | NP_001983 | S | Y | SY | possibly damaging |
| rs2227832 | NP_001983 | V | L | VL | benign            |
| rs2227840 | NP_000789 | C | S | CS | benign            |
| rs2227843 | NP_000789 | S | N | SN | benign            |
| rs2227845 | NP_000789 | F | V | FV | benign            |
| rs2227849 | NP_000789 | G | E | GE | probably damaging |
| rs2227852 | NP_000789 | V | I | VI | benign            |
| rs2227869 | NP_000114 | C | S | CS | benign            |
| rs2227870 | NP_000114 | A | E | AE | benign            |
| rs2227871 | NP_000114 | A | V | AV | benign            |
| rs2227872 | NP_000114 | T | M | TM | benign            |
| rs2227891 | NP_002853 | D | N | DN | benign            |
| rs2227902 | NP_005603 | E | D | ED | benign            |
| rs2227903 | NP_005603 | K | Q | KQ | benign            |
| rs2227914 | NP_008999 | M | V | MV | possibly damaging |
| rs2227928 | NP_001175 | M | T | MT | probably damaging |
| rs2227943 | NP_000050 | L | S | LS | benign            |
| rs2227944 | NP_000050 | N | I | NI | probably damaging |
| rs2227945 | NP_009230 | S | G | SG | benign            |
| rs2227945 | NP_009231 | S | G | SG | benign            |
| rs2227945 | NP_009232 | S | G | SG | benign            |
| rs2227945 | NP_009233 | S | G | SG | benign            |
| rs2227945 | NP_009228 | S | G | SG | benign            |
| rs2227954 | NP_000066 | H | Y | HY | probably damaging |
| rs2227955 | NP_005518 | E | A | EA | benign            |

|           |           |   |   |    |                   |
|-----------|-----------|---|---|----|-------------------|
| rs2227956 | NP_005518 | M | T | MT | benign            |
| rs2227963 | XP_497911 | P | L | PL | benign            |
| rs2227973 | NP_000439 | K | R | KR | benign            |
| rs2227988 | NP_005179 | L | F | LF | benign            |
| rs2228006 | NP_000526 | E | K | EK | benign            |
| rs2228007 | NP_000526 | T | A | TA | benign            |
| rs2228013 | NP_006158 | R | C | RC | benign            |
| rs2228049 | NP_000582 | N | D | ND | benign            |
| rs2228053 | NP_001072 | I | M | IM | benign            |
| rs2228059 | NP_751950 | N | T | NT | benign            |
| rs2228063 | NP_000058 | N | D | ND | benign            |
| rs2228065 | NP_000689 | E | K | EK | benign            |
| rs2228067 | NP_005381 | E | D | ED | benign            |
| rs2228076 | NP_055154 | A | V | AV | benign            |
| rs2228078 | NP_000814 | M | T | MT | possibly damaging |
| rs2228093 | NP_000683 | A | V | AV | possibly damaging |
| rs2228108 | NP_000584 | L | V | LV | benign            |
| rs2228137 | NP_001993 | R | W | RW | benign            |
| rs2228139 | NP_000868 | A | G | AG | benign            |
| rs2228152 | NP_000123 | R | G | RG | possibly damaging |
| rs2228154 | NP_000697 | G | S | GS | benign            |
| rs2228168 | NP_004516 | I | T | IT | benign            |
| rs2228180 | NP_003407 | S | L | SL | benign            |
| rs2228181 | NP_877962 | V | I | VI | benign            |
| rs2228193 | NP_002323 | L | F | LF | benign            |
| rs2228224 | NP_005260 | G | D | GD | possibly damaging |
| rs2228226 | NP_005260 | E | Q | EQ | benign            |
| rs2228231 | NP_004545 | S | N | SN | benign            |
| rs2228241 | NP_000129 | P | L | PL | probably damaging |
| rs2228257 | NP_003062 | E | Q | EQ | benign            |
| rs2228257 | NP_620636 | E | Q | EQ | benign            |
| rs2228259 | NP_005410 | C | S | CS | probably damaging |
| rs2228262 | NP_003237 | N | S | NS | possibly damaging |
| rs2228269 | NP_004445 | K | R | KR | benign            |
| rs2228271 | NP_003982 | R | M | RM | possibly damaging |
| rs2228271 | NP_000106 | R | M | RM | possibly damaging |
| rs2228273 | NP_003425 | G | E | GE | benign            |
| rs2228275 | NP_003427 | S | L | SL | probably damaging |
| rs2228277 | NP_003427 | S | L | SL | benign            |
| rs2228278 | NP_003427 | T | A | TA | possibly damaging |
| rs2228279 | NP_003427 | G | R | GR | benign            |
| rs2228292 | NP_004357 | E | D | ED | benign            |
| rs2228293 | NP_055439 | G | D | GD | possibly damaging |
| rs2228299 | NP_004724 | D | G | DG | benign            |
| rs2228305 | NP_004095 | V | I | VI | benign            |
| rs2228306 | NP_004095 | V | A | VA | benign            |

|           |           |   |   |    |                   |
|-----------|-----------|---|---|----|-------------------|
| rs2228307 | NP_004095 | I | V | IV | benign            |
| rs2228310 | NP_000523 | S | P | SP | benign            |
| rs2228315 | NP_002997 | M | I | MI | benign            |
| rs2228331 | NP_002072 | G | S | GS | benign            |
| rs2228337 | NP_000350 | D | V | DV | possibly damaging |
| rs2228413 | NP_001548 | R | Q | RQ | benign            |
| rs2228467 | NP_001287 | V | A | VA | benign            |
| rs2228468 | NP_001287 | Y | S | YS | benign            |
| rs2228469 | NP_001287 | A | V | AV | benign            |
| rs2228470 | NP_003725 | H | Y | HY | benign            |
| rs2228479 | NP_002377 | V | M | VM | benign            |
| rs2228487 | NP_006288 | R | H | RH | possibly damaging |
| rs2228500 | NP_000280 | R | Q | RQ | benign            |
| rs2228507 | NP_003480 | Y | F | YF | benign            |
| rs2228509 | NP_003913 | I | M | IM | benign            |
| rs2228510 | NP_003913 | V | I | VI | benign            |
| rs2228512 | NP_003913 | T | A | TA | benign            |
| rs2228513 | NP_003913 | S | F | SF | benign            |
| rs2228516 | NP_003913 | I | V | IV | benign            |
| rs2228525 | NP_000115 | T | M | TM | possibly damaging |
| rs2228526 | NP_000115 | M | V | MV | benign            |
| rs2228527 | NP_000115 | R | G | RG | probably damaging |
| rs2228528 | NP_000115 | G | D | GD | possibly damaging |
| rs2228529 | NP_000115 | Q | R | QR | benign            |
| rs2228533 | NP_001965 | E | D | ED | benign            |
| rs2228539 | NP_001965 | M | T | MT | benign            |
| rs2228541 | NP_001747 | S | A | SA | benign            |
| rs2228545 | NP_001195 | S | N | SN | benign            |
| rs2228546 | XP_498309 | L | F | LF | benign            |
| rs2228547 | NP_000484 | G | R | GR | possibly damaging |
| rs2228561 | NP_000085 | P | L | PL | benign            |
| rs2228563 | NP_000085 | R | K | RK | benign            |
| rs2228570 | NP_000367 | M | T | MT | probably damaging |
| rs2228575 | NP_001266 | D | N | DN | possibly damaging |
| rs2228601 | NP_004377 | A | T | AT | benign            |
| rs2228602 | NP_004377 | D | E | DE | benign            |
| rs2228603 | NP_004377 | P | S | PS | probably damaging |
| rs2228609 | NP_004034 | N | K | NK | possibly damaging |
| rs2228612 | NP_001370 | I | V | IV | benign            |
| rs2228615 | NP_003250 | T | A | TA | benign            |
| rs2228621 | NP_004161 | F | Y | FY | benign            |
| rs2228637 | NP_003864 | F | L | FL | possibly damaging |
| rs2228638 | NP_003864 | V | I | VI | benign            |
| rs2228644 | NP_002034 | V | I | VI | benign            |
| rs2228660 | NP_001340 | G | E | GE | benign            |
| rs2228667 | NP_000069 | V | M | VM | benign            |

|           |           |   |   |    |                   |
|-----------|-----------|---|---|----|-------------------|
| rs2228669 | NP_000859 | L | V | LV | benign            |
| rs2228672 | NP_002996 | S | A | SA | benign            |
| rs2228673 | NP_001036 | K | N | KN | benign            |
| rs2228898 | NP_060664 | E | G | EG | possibly damaging |
| rs2228956 | NP_996991 | H | R | HR | benign            |
| rs2228956 | NP_004310 | H | R | HR | benign            |
| rs2228965 | NP_000156 | T | M | TM | possibly damaging |
| rs2228976 | NP_002853 | A | S | AS | benign            |
| rs2228980 | NP_066287 | K | R | KR | benign            |
| rs2228991 | NP_005603 | V | I | VI | benign            |
| rs2229000 | NP_000208 | R | H | RH | benign            |
| rs2229006 | NP_004966 | T | N | TN | benign            |
| rs2229032 | NP_001175 | R | Q | RQ | benign            |
| rs2229033 | NP_001175 | K | N | KN | benign            |
| rs2229034 | XP_372262 | I | V | IV | benign            |
| rs2229051 | XP_498129 | R | K | RK | benign            |
| rs2229052 | XP_498129 | V | L | VL | benign            |
| rs2229053 | XP_498129 | F | Y | FY | benign            |
| rs2229054 | XP_498129 | K | R | KR | benign            |
| rs2229079 | NP_002935 | S | L | SL | benign            |
| rs2229080 | NP_005206 | R | G | RG | benign            |
| rs2229083 | NP_005350 | W | G | WG | probably damaging |
| rs2229086 | NP_005237 | V | L | VL | benign            |
| rs2229098 | NP_005182 | H | Y | HY | possibly damaging |
| rs2229103 | NP_000776 | V | A | VA | benign            |
| rs2229109 | NP_000918 | S | N | SN | benign            |
| rs2229113 | NP_001549 | G | R | GR | benign            |
| rs2229114 | NP_001549 | S | L | SL | benign            |
| rs2229116 | NP_001027 | I | V | IV | benign            |
| rs2229119 | NP_001027 | N | S | NS | benign            |
| rs2229125 | NP_150647 | I | S | IS | possibly damaging |
| rs2229125 | NP_000671 | I | S | IS | possibly damaging |
| rs2229125 | NP_150645 | I | S | IS | probably damaging |
| rs2229126 | NP_000671 | E | D | ED | benign            |
| rs2229127 | NP_000951 | V | M | VM | benign            |
| rs2229131 | NP_000951 | R | H | RH | benign            |
| rs2229137 | NP_005381 | M | L | ML | probably damaging |
| rs2229150 | NP_000490 | R | W | RW | probably damaging |
| rs2229152 | NP_000657 | R | C | RC | probably damaging |
| rs2229165 | NP_757351 | G | R | GR | probably damaging |
| rs2229170 | NP_001048 | R | H | RH | benign            |
| rs2229175 | NP_848514 | R | Q | RQ | benign            |
| rs2229175 | NP_001659 | R | Q | RQ | benign            |
| rs2229178 | NP_000708 | V | L | VL | benign            |
| rs2229196 | NP_001024 | V | A | VA | benign            |
| rs2229222 | NP_000143 | P | R | PR | probably damaging |

|           |              |   |   |    |                   |
|-----------|--------------|---|---|----|-------------------|
| rs2229224 | NP_000143    | R | Q | RQ | benign            |
| rs2229228 | NP_000914    | R | Q | RQ | benign            |
| rs2229232 | NP_002176    | T | M | TM | benign            |
| rs2229255 | NP_932172    | R | P | RP | possibly damaging |
| rs2229272 | NP_003398    | P | S | PS | benign            |
| rs2229277 | NP_002323    | Q | H | QH | possibly damaging |
| rs2229278 | NP_002323    | V | L | VL | benign            |
| rs2229279 | NP_002323    | H | Y | HY | possibly damaging |
| rs2229291 | NP_000089    | F | C | FC | probably damaging |
| rs2229296 | NP_003432    | K | E | KE | benign            |
| rs2229298 | NP_000005    | R | Q | RQ | possibly damaging |
| rs2229300 | NP_005260    | G | V | GV | probably damaging |
| rs2229304 | NP_002137    | T | P | TP | benign            |
| rs2229309 | NP_004545    | G | A | GA | benign            |
| rs2229311 | NP_002216    | R | H | RH | probably damaging |
| rs2229319 | NP_000237    | A | G | AG | benign            |
| rs2229324 | NP_000129    | I | V | IV | benign            |
| rs2229330 | NP_005332    | S | A | SA | benign            |
| rs2229333 | NP_733796    | P | L | PL | probably damaging |
| rs2229333 | NP_775299    | P | L | PL | probably damaging |
| rs2229333 | NP_777480    | P | L | PL | probably damaging |
| rs2229357 | NP_005529    | R | Q | RQ | benign            |
| rs2229361 | NP_003062    | R | H | RH | benign            |
| rs2229361 | NP_620636    | R | H | RH | benign            |
| rs2229362 | NP_620309    | A | T | AT | benign            |
| rs2229363 | NP_005410    | Q | H | QH | benign            |
| rs2229367 | NP_003195    | D | H | DH | possibly damaging |
| rs2229373 | NP_003431    | A | V | AV | benign            |
| rs2229389 | NP_000020    | G | C | GC | possibly damaging |
| rs2229399 | NP_000583    | I | L | IL | benign            |
| rs2229399 | NP_001002029 | I | L | IL | benign            |
| rs2229400 | NP_000583    | H | D | HD | probably damaging |
| rs2229400 | NP_001002029 | H | D | HD | probably damaging |
| rs2229408 | NP_000583    | P | L | PL | probably damaging |
| rs2229408 | NP_001002029 | P | L | PL | probably damaging |
| rs2229423 | NP_004095    | R | C | RC | probably damaging |
| rs2229424 | NP_004095    | R | H | RH | possibly damaging |
| rs2229426 | NP_004095    | P | L | PL | probably damaging |
| rs2229440 | NP_004590    | V | M | VM | benign            |
| rs2229459 | NP_000701    | A | V | AV | benign            |
| rs2229464 | NP_000350    | R | C | RC | possibly damaging |
| rs2229512 | NP_000413    | R | Q | RQ | benign            |
| rs2229522 | NP_002517    | D | E | DE | benign            |
| rs2229523 | NP_002517    | T | A | TA | benign            |
| rs2229524 | NP_002517    | M | T | MT | possibly damaging |
| rs2229531 | NP_001602    | V | M | VM | benign            |



|           |           |   |   |    |                   |
|-----------|-----------|---|---|----|-------------------|
| rs2229532 | NP_001602 | V | I | VI | benign            |
| rs2229558 | NP_002600 | P | S | PS | benign            |
| rs2229560 | NP_002600 | I | T | IT | benign            |
| rs2229571 | NP_000456 | R | S | RS | benign            |
| rs2229579 | NP_001832 | H | Y | HY | benign            |
| rs2229595 | NP_003725 | R | Q | RQ | benign            |
| rs2229596 | NP_003725 | R | W | RW | probably damaging |
| rs2229608 | NP_000331 | I | T | IT | possibly damaging |
| rs2229616 | NP_005903 | I | V | IV | benign            |
| rs2229617 | NP_002377 | G | S | GS | benign            |
| rs2229629 | NP_000180 | R | K | RK | possibly damaging |
| rs2229642 | NP_002215 | L | V | LV | benign            |
| rs2229656 | NP_003095 | E | K | EK | probably damaging |
| rs2229658 | XP_007651 | Q | R | QR | benign            |
| rs2229659 | NP_003095 | V | L | VL | benign            |
| rs2229662 | NP_940991 | V | L | VL | benign            |
| rs2229662 | NP_001719 | V | L | VL | benign            |
| rs2229668 | NP_001738 | V | I | VI | benign            |
| rs2229685 | XP_497846 | N | S | NS | possibly damaging |
| rs2229692 | NP_004564 | E | G | EG | benign            |
| rs2229699 | NP_002332 | A | D | AD | benign            |
| rs2229710 | NP_002944 | N | K | NK | possibly damaging |
| rs2229712 | NP_002944 | K | T | KT | benign            |
| rs2229742 | NP_003480 | G | R | GR | probably damaging |
| rs2229743 | NP_003480 | P | L | PL | probably damaging |
| rs2229746 | NP_003913 | T | A | TA | benign            |
| rs2229749 | NP_003913 | D | E | DE | benign            |
| rs2229761 | NP_000115 | V | L | VL | benign            |
| rs2229769 | NP_001965 | F | C | FC | probably damaging |
| rs2229774 | NP_000957 | S | L | SL | possibly damaging |
| rs2229782 | XP_498309 | M | T | MT | benign            |
| rs2229806 | NP_000080 | A | V | AV | benign            |
| rs2229818 | NP_000085 | R | C | RC | possibly damaging |
| rs2229831 | NP_002969 | N | I | NI | probably damaging |
| rs2229839 | NP_000780 | P | L | PL | probably damaging |
| rs2229847 | NP_001397 | G | E | GE | probably damaging |
| rs2229848 | NP_000417 | V | A | VA | benign            |
| rs2229857 | NP_056655 | R | K | RK | benign            |
| rs2229857 | NP_056656 | R | K | RK | benign            |
| rs2229857 | NP_001102 | R | K | RK | benign            |
| rs2229860 | NP_005036 | P | R | PR | probably damaging |
| rs2229860 | NP_774959 | P | R | PR | probably damaging |
| rs2229876 | NP_597994 | F | I | FI | probably damaging |
| rs2229876 | NP_002866 | F | I | FI | probably damaging |
| rs2229885 | NP_004161 | A | G | AG | benign            |
| rs2229886 | NP_004578 | C | R | CR | benign            |

|           |           |   |   |    |                   |
|-----------|-----------|---|---|----|-------------------|
| rs2229887 | NP_004578 | R | K | RK | benign            |
| rs2229893 | NP_004578 | M | T | MT | possibly damaging |
| rs2229928 | NP_778203 | R | S | RS | benign            |
| rs2229928 | NP_001834 | R | S | RS | benign            |
| rs2229940 | NP_000800 | L | M | LM | benign            |
| rs2229954 | NP_000716 | R | H | RH | benign            |
| rs2229956 | NP_000737 | S | L | SL | possibly damaging |
| rs2229961 | NP_000736 | V | I | VI | benign            |
| rs2229962 | NP_000162 | G | D | GD | possibly damaging |
| rs2229967 | NP_005963 | S | A | SA | benign            |
| rs2229995 | NP_000029 | G | S | GS | possibly damaging |
| rs2229996 | NP_000029 | T | S | TS | benign            |
| rs2229999 | NP_005366 | T | I | TI | possibly damaging |
| rs2230000 | NP_005366 | T | N | TN | benign            |
| rs2230003 | NP_116559 | V | I | VI | benign            |
| rs2230003 | NP_002898 | V | I | VI | benign            |
| rs2230017 | NP_597816 | T | I | TI | possibly damaging |
| rs2230018 | NP_066963 | T | K | TK | benign            |
| rs2230033 | NP_733933 | G | D | GD | benign            |
| rs2230043 | NP_000867 | E | A | EA | probably damaging |
| rs2230048 | NP_000867 | T | S | TS | benign            |
| rs2230050 | NP_076918 | A | V | AV | benign            |
| rs2230050 | NP_008831 | A | V | AV | benign            |
| rs2230055 | NP_002168 | R | S | RS | benign            |
| rs2230086 | NP_006444 | Q | R | QR | benign            |
| rs2230092 | NP_775186 | S | L | SL | possibly damaging |
| rs2230092 | NP_775187 | S | L | SL | possibly damaging |
| rs2230092 | NP_004546 | S | L | SL | possibly damaging |
| rs2230092 | NP_775188 | S | L | SL | possibly damaging |
| rs2230093 | NP_775186 | L | S | LS | possibly damaging |
| rs2230093 | NP_775187 | L | S | LS | possibly damaging |
| rs2230093 | NP_004546 | L | S | LS | possibly damaging |
| rs2230093 | NP_775188 | L | S | LS | possibly damaging |
| rs2230094 | NP_775186 | P | L | PL | probably damaging |
| rs2230094 | NP_775187 | P | L | PL | probably damaging |
| rs2230094 | NP_004546 | P | L | PL | probably damaging |
| rs2230094 | NP_775188 | P | L | PL | probably damaging |
| rs2230095 | NP_775186 | P | S | PS | benign            |
| rs2230095 | NP_775187 | P | S | PS | benign            |
| rs2230095 | NP_004546 | P | S | PS | benign            |
| rs2230095 | NP_775188 | P | S | PS | benign            |
| rs2230098 | NP_002883 | N | S | NS | benign            |
| rs2230098 | NP_075376 | N | S | NS | benign            |
| rs2230098 | NP_075377 | N | S | NS | benign            |
| rs2230115 | XP_376172 | A | T | AT | benign            |
| rs2230129 | NP_647610 | L | M | LM | benign            |

|           |           |   |   |    |                   |
|-----------|-----------|---|---|----|-------------------|
| rs2230129 | NP_005670 | L | M | LM | benign            |
| rs2230131 | NP_647610 | P | L | PL | probably damaging |
| rs2230131 | NP_005670 | P | L | PL | probably damaging |
| rs2230143 | NP_003370 | A | P | AP | benign            |
| rs2230165 | NP_003794 | T | M | TM | benign            |
| rs2230169 | NP_002366 | E | Q | EQ | benign            |
| rs2230180 | NP_000009 | E | K | EK | benign            |
| rs2230190 | NP_006193 | H | Y | HY | possibly damaging |
| rs2230199 | NP_000055 | R | G | RG | benign            |
| rs2230210 | NP_000055 | S | R | SR | possibly damaging |
| rs2230216 | NP_001919 | I | M | IM | benign            |
| rs2230231 | NP_005208 | D | A | DA | benign            |
| rs2230239 | NP_002379 | R | W | RW | possibly damaging |
| rs2230240 | NP_002379 | E | K | EK | benign            |
| rs2230241 | NP_002682 | R | H | RH | benign            |
| rs2230243 | NP_002682 | P | L | PL | benign            |
| rs2230273 | NP_002024 | I | V | IV | benign            |
| rs2230281 | NP_003765 | I | T | IT | possibly damaging |
| rs2230283 | NP_003765 | V | I | VI | benign            |
| rs2230294 | NP_000166 | R | H | RH | benign            |
| rs2230301 | NP_004437 | E | D | ED | benign            |
| rs2230329 | NP_786886 | G | S | GS | benign            |
| rs2230330 | NP_002059 | M | I | MI | benign            |
| rs2230339 | NP_003476 | R | Q | RQ | benign            |
| rs2230344 | NP_005281 | P | S | PS | possibly damaging |
| rs2230362 | NP_036617 | D | H | DH | benign            |
| rs2230362 | NP_036616 | D | H | DH | benign            |
| rs2230390 | NP_002195 | I | F | IF | benign            |
| rs2230390 | NP_005492 | I | F | IF | benign            |
| rs2230392 | NP_002195 | A | T | AT | benign            |
| rs2230392 | NP_005492 | A | T | AT | benign            |
| rs2230399 | NP_002153 | S | T | ST | benign            |
| rs2230433 | NP_002200 | R | T | RT | possibly damaging |
| rs2230449 | NP_005648 | R | Q | RQ | benign            |
| rs2230454 | NP_002453 | Q | H | QH | possibly damaging |
| rs2230458 | NP_620121 | V | L | VL | benign            |
| rs2230458 | NP_620176 | V | L | VL | benign            |
| rs2230458 | NP_620177 | V | L | VL | benign            |
| rs2230458 | NP_000910 | V | L | VL | benign            |
| rs2230462 | NP_006210 | Q | H | QH | benign            |
| rs2230469 | NP_005019 | N | S | NS | benign            |
| rs2230470 | NP_005019 | L | M | LM | benign            |
| rs2230491 | NP_004848 | P | L | PL | probably damaging |
| rs2230492 | NP_004848 | S | F | SF | benign            |
| rs2230512 | NP_003309 | D | N | DN | benign            |
| rs2230513 | NP_003309 | A | V | AV | benign            |

|           |           |   |   |    |                   |
|-----------|-----------|---|---|----|-------------------|
| rs2230516 | NP_006334 | R | W | RW | possibly damaging |
| rs2230517 | NP_006334 | V | I | VI | benign            |
| rs2230523 | NP_005573 | T | A | TA | benign            |
| rs2230524 | NP_005573 | F | L | FL | benign            |
| rs2230537 | NP_003148 | T | I | TI | possibly damaging |
| rs2230539 | NP_002732 | I | V | IV | benign            |
| rs2230539 | NP_998725 | I | V | IV | benign            |
| rs2230558 | XP_290345 | H | P | HP | probably damaging |
| rs2230570 | NP_004944 | L | P | LP | benign            |
| rs2230570 | NP_886553 | L | P | LP | benign            |
| rs2230570 | NP_937884 | L | P | LP | benign            |
| rs2230570 | NP_937885 | L | P | LP | benign            |
| rs2230570 | NP_937887 | L | P | LP | benign            |
| rs2230590 | NP_002438 | R | Q | RQ | benign            |
| rs2230592 | NP_002438 | N | S | NS | benign            |
| rs2230593 | NP_002438 | Q | R | QR | benign            |
| rs2230610 | NP_570924 | A | V | AV | benign            |
| rs2230610 | NP_002841 | A | V | AV | benign            |
| rs2230653 | NP_005310 | A | V | AV | benign            |
| rs2230667 | NP_001562 | R | Q | RQ | benign            |
| rs2230674 | NP_005162 | P | A | PA | probably damaging |
| rs2230679 | NP_005617 | E | D | ED | benign            |
| rs2230681 | NP_002804 | V | A | VA | benign            |
| rs2230720 | NP_005996 | A | V | AV | benign            |
| rs2230723 | NP_004963 | L | V | LV | benign            |
| rs2230747 | NP_001073 | V | M | VM | benign            |
| rs2230748 | NP_001775 | R | Q | RQ | benign            |
| rs2230748 | NP_510966 | R | Q | RQ | benign            |
| rs2230749 | NP_004143 | S | F | SF | benign            |
| rs2230750 | NP_003442 | D | G | DG | benign            |
| rs2230752 | NP_003442 | F | I | FI | benign            |
| rs2230767 | NP_003886 | P | L | PL | possibly damaging |
| rs2230768 | NP_005742 | R | Q | RQ | benign            |
| rs2230768 | NP_671695 | R | Q | RQ | benign            |
| rs2230768 | NP_671714 | R | Q | RQ | benign            |
| rs2230768 | NP_671700 | R | Q | RQ | benign            |
| rs2230770 | NP_644804 | V | M | VM | benign            |
| rs2230770 | NP_003479 | V | M | VM | benign            |
| rs2230771 | NP_644804 | C | Y | CY | benign            |
| rs2230771 | NP_003479 | C | Y | CY | probably damaging |
| rs2230781 | NP_006525 | P | S | PS | benign            |
| rs2230781 | NP_858045 | P | S | PS | benign            |
| rs2230782 | NP_006525 | Q | H | QH | possibly damaging |
| rs2230782 | NP_858045 | Q | H | QH | possibly damaging |
| rs2230799 | NP_003941 | R | Q | RQ | benign            |
| rs2230806 | NP_005493 | R | K | RK | benign            |

|           |           |   |   |    |                   |
|-----------|-----------|---|---|----|-------------------|
| rs2230808 | NP_005493 | K | R | KR | benign            |
| rs2230848 | NP_000120 | M | K | MK | probably damaging |
| rs2230849 | NP_001983 | Y | N | YN | probably damaging |
| rs2230850 | NP_000258 | V | L | VL | benign            |
| rs2230853 | NP_002162 | G | A | GA | benign            |
| rs2230855 | NP_003282 | A | V | AV | benign            |
| rs2230912 | NP_002553 | Q | R | QR | benign            |
| rs2230913 | NP_002553 | H | Q | HQ | possibly damaging |
| rs2230917 | NP_006261 | V | L | VL | benign            |
| rs2230922 | NP_002988 | T | M | TM | possibly damaging |
| rs2230926 | NP_006281 | F | C | FC | benign            |
| rs2230950 | NP_002107 | V | I | VI | benign            |
| rs2230951 | NP_002107 | A | P | AP | benign            |
| rs2230953 | NP_002107 | L | V | LV | benign            |
| rs2230954 | NP_002107 | S | L | SL | benign            |
| rs2230955 | NP_002107 | A | P | AP | possibly damaging |
| rs2230957 | NP_002107 | A | V | AV | benign            |
| rs2230958 | NP_002107 | W | R | WR | possibly damaging |
| rs2231064 | NP_002107 | E | D | ED | benign            |
| rs2231065 | NP_002107 | W | G | WG | probably damaging |
| rs2231066 | NP_002107 | Y | H | YH | benign            |
| rs2231067 | NP_002107 | G | R | GR | probably damaging |
| rs2231068 | NP_002107 | T | A | TA | benign            |
| rs2231070 | NP_002107 | P | T | PT | benign            |
| rs2231072 | NP_002107 | K | R | KR | benign            |
| rs2231076 | NP_002107 | P | A | PA | benign            |
| rs2231078 | NP_002107 | I | V | IV | benign            |
| rs2231082 | NP_002107 | G | S | GS | benign            |
| rs2231087 | NP_002107 | A | E | AE | probably damaging |
| rs2231091 | NP_002107 | A | V | AV | benign            |
| rs2231093 | NP_002107 | A | S | AS | benign            |
| rs2231095 | NP_002107 | E | K | EK | benign            |
| rs2231096 | NP_002107 | Q | K | QK | benign            |
| rs2231100 | NP_002107 | K | E | KE | benign            |
| rs2231101 | NP_002107 | L | P | LP | benign            |
| rs2231103 | NP_002107 | I | V | IV | benign            |
| rs2231104 | NP_002107 | P | H | PH | benign            |
| rs2231106 | NP_002107 | I | L | IL | benign            |
| rs2231108 | NP_002107 | L | F | LF | benign            |
| rs2231109 | NP_002107 | G | A | GA | benign            |
| rs2231111 | NP_002107 | I | F | IF | benign            |
| rs2231114 | NP_002107 | M | R | MR | possibly damaging |
| rs2231115 | NP_002107 | R | K | RK | benign            |
| rs2231117 | NP_002107 | D | V | DV | benign            |
| rs2231119 | NP_002107 | T | S | TS | benign            |
| rs2231120 | NP_002107 | V | M | VM | benign            |

|           |           |   |   |    |                   |
|-----------|-----------|---|---|----|-------------------|
| rs2231131 | NP_061863 | A | T | AT | benign            |
| rs2231137 | NP_004818 | V | M | VM | probably damaging |
| rs2231142 | NP_004818 | Q | K | QK | benign            |
| rs2231198 | NP_003680 | V | M | VM | benign            |
| rs2231200 | NP_003680 | G | S | GS | benign            |
| rs2231203 | NP_003680 | S | N | SN | benign            |
| rs2231206 | NP_003680 | A | V | AV | benign            |
| rs2231233 | NP_004916 | D | N | DN | benign            |
| rs2231249 | NP_659540 | A | V | AV | benign            |
| rs2231249 | NP_037379 | A | V | AV | benign            |
| rs2231257 | NP_149359 | D | N | DN | benign            |
| rs2231260 | NP_003773 | G | R | GR | benign            |
| rs2231267 | NP_006804 | P | S | PS | possibly damaging |
| rs2231268 | NP_006804 | G | D | GD | possibly damaging |
| rs2231269 | NP_006804 | A | T | AT | benign            |
| rs2231270 | NP_006804 | A | T | AT | benign            |
| rs2231271 | NP_006804 | A | V | AV | benign            |
| rs2231272 | NP_006804 | P | R | PR | benign            |
| rs2231275 | NP_006804 | P | S | PS | possibly damaging |
| rs2231277 | NP_006804 | P | L | PL | probably damaging |
| rs2231342 | NP_055297 | T | S | TS | benign            |
| rs2231345 | NP_055297 | N | K | NK | benign            |
| rs2231347 | NP_055297 | A | T | AT | benign            |
| rs2231366 | NP_004323 | A | V | AV | benign            |
| rs2231369 | NP_004323 | R | W | RW | probably damaging |
| rs2231370 | NP_004323 | L | S | LS | possibly damaging |
| rs2231373 | NP_008984 | I | V | IV | benign            |
| rs2231393 | NP_036397 | A | T | AT | benign            |
| rs2231394 | NP_036397 | R | C | RC | benign            |
| rs2231397 | NP_036397 | H | R | HR | benign            |
| rs2231400 | NP_689785 | I | T | IT | possibly damaging |
| rs2231406 | NP_061829 | V | I | VI | benign            |
| rs2231412 | NP_061829 | T | M | TM | benign            |
| rs2231420 | NP_005176 | E | Q | EQ | probably damaging |
| rs2231426 | NP_006420 | N | S | NS | benign            |
| rs2231427 | NP_006420 | T | A | TA | benign            |
| rs2231483 | NP_008996 | E | D | ED | benign            |
| rs2231495 | NP_803124 | H | R | HR | benign            |
| rs2231495 | NP_059120 | H | R | HR | benign            |
| rs2231503 | NP_006440 | Q | H | QH | possibly damaging |
| rs2231508 | NP_001258 | R | W | RW | probably damaging |
| rs2231510 | NP_001258 | T | I | TI | possibly damaging |
| rs2231522 | NP_059140 | C | Y | CY | probably damaging |
| rs2231542 | NP_065135 | V | L | VL | benign            |
| rs2231543 | NP_065135 | P | L | PL | possibly damaging |
| rs2231546 | NP_065135 | G | S | GS | benign            |

|           |           |   |   |    |                   |
|-----------|-----------|---|---|----|-------------------|
| rs2231547 | NP_065135 | E | A | EA | probably damaging |
| rs2231548 | NP_065135 | R | C | RC | possibly damaging |
| rs2231630 | NP_056494 | P | L | PL | benign            |
| rs2231637 | NP_056494 | T | S | TS | benign            |
| rs2231650 | NP_057522 | D | N | DN | benign            |
| rs2231658 | NP_003380 | G | R | GR | probably damaging |
| rs2231658 | NP_438171 | G | R | GR | probably damaging |
| rs2231659 | NP_003380 | H | Q | HQ | probably damaging |
| rs2231659 | NP_438171 | H | Q | HQ | probably damaging |
| rs2231660 | NP_003380 | A | T | AT | benign            |
| rs2231660 | NP_438171 | A | T | AT | benign            |
| rs2231666 | NP_003380 | R | H | RH | possibly damaging |
| rs2231666 | NP_438171 | R | H | RH | possibly damaging |
| rs2231682 | NP_004367 | R | C | RC | probably damaging |
| rs2231682 | NP_510870 | R | C | RC | probably damaging |
| rs2231705 | NP_055131 | G | S | GS | benign            |
| rs2231752 | NP_056324 | D | N | DN | benign            |
| rs2231791 | NP_004641 | V | I | VI | benign            |
| rs2231793 | NP_004641 | R | Q | RQ | benign            |
| rs2231798 | NP_005855 | T | A | TA | benign            |
| rs2231801 | NP_115835 | V | M | VM | benign            |
| rs2231801 | NP_005855 | V | M | VM | benign            |
| rs2231804 | NP_115835 | R | Q | RQ | benign            |
| rs2231804 | NP_005855 | R | Q | RQ | benign            |
| rs2231805 | NP_115835 | R | W | RW | benign            |
| rs2231805 | NP_005855 | R | W | RW | probably damaging |
| rs2231806 | NP_115835 | S | F | SF | benign            |
| rs2231806 | NP_005855 | S | F | SF | possibly damaging |
| rs2231812 | NP_115835 | V | M | VM | benign            |
| rs2231812 | NP_005855 | V | M | VM | benign            |
| rs2231838 | NP_852479 | H | R | HR | benign            |
| rs2231838 | NP_065131 | H | R | HR | benign            |
| rs2231839 | NP_065131 | K | T | KT | benign            |
| rs2231839 | NP_852479 | K | T | KT | possibly damaging |
| rs2231878 | NP_005239 | D | V | DV | probably damaging |
| rs2231889 | NP_004205 | R | Q | RQ | benign            |
| rs2231889 | NP_942600 | R | Q | RQ | benign            |
| rs2231890 | NP_942600 | E | V | EV | benign            |
| rs2231893 | NP_004205 | M | V | MV | possibly damaging |
| rs2231893 | NP_942600 | M | V | MV | possibly damaging |
| rs2231904 | NP_060556 | R | C | RC | benign            |
| rs2231905 | NP_060556 | K | R | KR | benign            |
| rs2231908 | NP_060649 | E | K | EK | benign            |
| rs2231909 | NP_060649 | N | I | NI | probably damaging |
| rs2231916 | NP_277019 | R | P | RP | possibly damaging |
| rs2231916 | NP_036308 | R | P | RP | possibly damaging |

|           |           |   |   |    |                   |
|-----------|-----------|---|---|----|-------------------|
| rs2231917 | NP_277019 | S | R | SR | benign            |
| rs2231917 | NP_036308 | S | R | SR | benign            |
| rs2231924 | NP_060499 | S | P | SP | possibly damaging |
| rs2231926 | NP_060499 | I | V | IV | benign            |
| rs2231927 | NP_060499 | M | R | MR | benign            |
| rs2231975 | NP_060543 | C | Y | CY | probably damaging |
| rs2231976 | NP_060543 | R | H | RH | benign            |
| rs2231983 | NP_060562 | S | T | ST | benign            |
| rs2232005 | NP_060603 | P | T | PT | possibly damaging |
| rs2232016 | NP_060607 | A | V | AV | benign            |
| rs2232026 | NP_060646 | R | Q | RQ | benign            |
| rs2232027 | NP_060646 | Q | R | QR | benign            |
| rs2232032 | NP_060698 | L | F | LF | benign            |
| rs2232059 | NP_060845 | M | T | MT | possibly damaging |
| rs2232061 | NP_060845 | G | A | GA | possibly damaging |
| rs2232074 | NP_060141 | K | R | KR | benign            |
| rs2232078 | NP_060141 | A | T | AT | benign            |
| rs2232088 | NP_061881 | R | W | RW | probably damaging |
| rs2232092 | NP_061881 | L | P | LP | possibly damaging |
| rs2232142 | XP_373413 | V | D | VD | possibly damaging |
| rs2232143 | XP_373413 | H | R | HR | possibly damaging |
| rs2232176 | NP_056530 | A | S | AS | benign            |
| rs2232177 | NP_056530 | A | V | AV | benign            |
| rs2232180 | NP_056530 | H | Y | HY | benign            |
| rs2232183 | NP_056530 | R | Q | RQ | benign            |
| rs2232202 | NP_005267 | I | V | IV | benign            |
| rs2232207 | NP_005267 | V | A | VA | possibly damaging |
| rs2232221 | NP_291031 | N | K | NK | benign            |
| rs2232229 | NP_005320 | R | H | RH | benign            |
| rs2232229 | NP_619515 | R | H | RH | benign            |
| rs2232250 | NP_057257 | R | Q | RQ | benign            |
| rs2232251 | NP_057257 | H | Q | HQ | possibly damaging |
| rs2232259 | NP_036393 | D | G | DG | benign            |
| rs2232263 | NP_036393 | I | V | IV | benign            |
| rs2232264 | NP_036393 | Q | E | QE | benign            |
| rs2232266 | NP_036393 | S | G | SG | benign            |
| rs2232289 | NP_057554 | V | I | VI | benign            |
| rs2232300 | NP_057569 | C | S | CS | probably damaging |
| rs2232302 | NP_057569 | R | H | RH | possibly damaging |
| rs2232307 | NP_057569 | I | M | IM | benign            |
| rs2232322 | NP_066999 | I | V | IV | benign            |
| rs2232323 | NP_066999 | Y | S | YS | probably damaging |
| rs2232326 | NP_066999 | S | P | SP | possibly damaging |
| rs2232327 | NP_066999 | P | L | PL | probably damaging |
| rs2232328 | NP_066999 | S | C | SC | probably damaging |
| rs2232337 | NP_061195 | G | R | GR | possibly damaging |



|           |           |   |   |    |                   |
|-----------|-----------|---|---|----|-------------------|
| rs2232337 | NP_758434 | G | R | GR | probably damaging |
| rs2232340 | NP_758434 | A | V | AV | benign            |
| rs2232340 | NP_061195 | A | V | AV | benign            |
| rs2232343 | NP_758434 | R | Q | RQ | benign            |
| rs2232343 | NP_061195 | R | Q | RQ | benign            |
| rs2232346 | NP_061195 | F | L | FL | benign            |
| rs2232350 | NP_061195 | I | T | IT | benign            |
| rs2232351 | NP_061195 | N | S | NS | benign            |
| rs2232369 | NP_054728 | A | V | AV | benign            |
| rs2232376 | NP_057442 | A | T | AT | benign            |
| rs2232384 | NP_004684 | R | C | RC | possibly damaging |
| rs2232386 | NP_004684 | P | A | PA | benign            |
| rs2232387 | NP_004684 | A | T | AT | benign            |
| rs2232390 | NP_004684 | R | Q | RQ | benign            |
| rs2232393 | NP_004684 | E | G | EG | probably damaging |
| rs2232396 | NP_004684 | R | C | RC | benign            |
| rs2232397 | NP_004684 | R | W | RW | probably damaging |
| rs2232398 | NP_004684 | E | K | EK | probably damaging |
| rs2232402 | NP_004684 | I | V | IV | benign            |
| rs2232405 | NP_004684 | M | T | MT | probably damaging |
| rs2232406 | NP_004684 | R | C | RC | benign            |
| rs2232416 | NP_057695 | T | M | TM | benign            |
| rs2232416 | NP_201568 | T | M | TM | benign            |
| rs2232423 | NP_055539 | M | T | MT | benign            |
| rs2232430 | NP_055539 | R | K | RK | benign            |
| rs2232431 | NP_055539 | I | K | IK | benign            |
| rs2232432 | NP_055539 | C | R | CR | probably damaging |
| rs2232434 | NP_055539 | N | D | ND | benign            |
| rs2232436 | NP_055539 | P | R | PR | probably damaging |
| rs2232437 | NP_055539 | H | Y | HY | benign            |
| rs2232448 | XP_376525 | A | T | AT | benign            |
| rs2232455 | XP_375685 | P | L | PL | probably damaging |
| rs2232470 | NP_067680 | R | L | RL | possibly damaging |
| rs2232483 | NP_060045 | R | Q | RQ | benign            |
| rs2232487 | NP_060045 | N | S | NS | benign            |
| rs2232505 | NP_055755 | S | R | SR | benign            |
| rs2232507 | NP_055755 | R | W | RW | probably damaging |
| rs2232532 | NP_036559 | G | R | GR | benign            |
| rs2232534 | NP_036559 | I | V | IV | benign            |
| rs2232535 | NP_036559 | S | T | ST | benign            |
| rs2232551 | NP_000414 | R | G | RG | probably damaging |
| rs2232557 | NP_000414 | R | H | RH | benign            |
| rs2232565 | NP_002280 | I | V | IV | benign            |
| rs2232583 | NP_004130 | R | Q | RQ | benign            |
| rs2232585 | NP_004130 | L | I | LI | benign            |
| rs2232586 | NP_004130 | S | C | SC | possibly damaging |

|           |           |   |   |    |                   |
|-----------|-----------|---|---|----|-------------------|
| rs2232591 | NP_004130 | L | F | LF | benign            |
| rs2232597 | NP_004130 | D | N | DN | benign            |
| rs2232601 | NP_004130 | M | I | MI | benign            |
| rs2232607 | NP_004130 | D | G | DG | possibly damaging |
| rs2232608 | NP_004130 | H | R | HR | probably damaging |
| rs2232610 | NP_004130 | R | Q | RQ | benign            |
| rs2232613 | NP_004130 | P | L | PL | probably damaging |
| rs2232615 | NP_004130 | I | T | IT | possibly damaging |
| rs2232618 | NP_004130 | F | L | FL | benign            |
| rs2232619 | NP_004130 | A | T | AT | benign            |
| rs2232627 | NP_005555 | P | S | PS | possibly damaging |
| rs2232633 | NP_958800 | R | Q | RQ | benign            |
| rs2232640 | NP_996820 | E | G | EG | probably damaging |
| rs2232641 | NP_996820 | I | V | IV | benign            |
| rs2232642 | NP_996820 | A | T | AT | benign            |
| rs2232659 | NP_057000 | A | T | AT | benign            |
| rs2232660 | NP_057000 | V | G | VG | probably damaging |
| rs2232662 | NP_057000 | V | M | VM | benign            |
| rs2232699 | NP_057270 | L | Q | LQ | benign            |
| rs2232700 | NP_057270 | T | S | TS | benign            |
| rs2232701 | NP_057270 | R | H | RH | benign            |
| rs2232708 | NP_057270 | G | S | GS | benign            |
| rs2232710 | NP_057270 | Q | R | QR | benign            |
| rs2232743 | NP_057578 | A | V | AV | benign            |
| rs2232760 | NP_057647 | Q | P | QP | benign            |
| rs2232786 | NP_057663 | E | K | EK | benign            |
| rs2232791 | NP_057712 | T | A | TA | benign            |
| rs2232791 | NP_567822 | T | A | TA | benign            |
| rs2232791 | NP_567823 | T | A | TA | benign            |
| rs2232793 | NP_567823 | P | T | PT | benign            |
| rs2232793 | NP_057712 | P | T | PT | possibly damaging |
| rs2232793 | NP_567822 | P | T | PT | possibly damaging |
| rs2232816 | NP_057019 | M | V | MV | possibly damaging |
| rs2232817 | NP_057019 | Q | R | QR | possibly damaging |
| rs2232819 | NP_057019 | M | I | MI | possibly damaging |
| rs2232840 | NP_057168 | S | G | SG | benign            |
| rs2232842 | NP_057327 | N | S | NS | benign            |
| rs2232918 | NP_067034 | A | V | AV | benign            |
| rs2232919 | NP_067034 | Q | R | QR | benign            |
| rs2232920 | NP_067034 | P | S | PS | possibly damaging |
| rs2232924 | NP_067034 | R | G | RG | possibly damaging |
| rs2232940 | NP_006543 | N | T | NT | benign            |
| rs2232950 | NP_006542 | P | L | PL | benign            |
| rs2233044 | NP_004979 | A | T | AT | benign            |
| rs2233049 | NP_005357 | S | R | SR | benign            |
| rs2233060 | NP_057333 | E | Q | EQ | benign            |

|           |           |   |   |    |                   |
|-----------|-----------|---|---|----|-------------------|
| rs2233078 | NP_620602 | P | S | PS | possibly damaging |
| rs2233078 | NP_620603 | P | S | PS | possibly damaging |
| rs2233078 | NP_002740 | P | S | PS | possibly damaging |
| rs2233090 | NP_085080 | G | D | GD | possibly damaging |
| rs2233090 | NP_085095 | G | D | GD | possibly damaging |
| rs2233092 | NP_003824 | R | C | RC | possibly damaging |
| rs2233092 | NP_085080 | R | C | RC | possibly damaging |
| rs2233092 | NP_085095 | R | C | RC | probably damaging |
| rs2233103 | NP_003824 | E | K | EK | benign            |
| rs2233103 | NP_085080 | E | K | EK | benign            |
| rs2233103 | NP_085095 | E | K | EK | benign            |
| rs2233104 | NP_003824 | P | L | PL | possibly damaging |
| rs2233104 | NP_085095 | P | L | PL | possibly damaging |
| rs2233104 | NP_085080 | P | L | PL | probably damaging |
| rs2233105 | NP_003824 | R | C | RC | possibly damaging |
| rs2233105 | NP_085080 | R | C | RC | probably damaging |
| rs2233105 | NP_085095 | R | C | RC | probably damaging |
| rs2233106 | NP_003824 | N | K | NK | benign            |
| rs2233106 | NP_085080 | N | K | NK | possibly damaging |
| rs2233106 | NP_085095 | N | K | NK | possibly damaging |
| rs2233110 | NP_054779 | L | H | LH | probably damaging |
| rs2233158 | NP_006524 | T | I | TI | possibly damaging |
| rs2233167 | NP_004888 | V | G | VG | benign            |
| rs2233210 | NP_789776 | V | A | VA | benign            |
| rs2233211 | NP_789776 | V | G | VG | possibly damaging |
| rs2233213 | NP_004522 | T | A | TA | benign            |
| rs2233215 | NP_004522 | T | A | TA | benign            |
| rs2233217 | NP_004522 | A | V | AV | benign            |
| rs2233218 | NP_004522 | H | Y | HY | possibly damaging |
| rs2233221 | NP_004522 | N | S | NS | benign            |
| rs2233241 | NP_996821 | E | K | EK | benign            |
| rs2233241 | NP_996823 | E | K | EK | benign            |
| rs2233241 | NP_996822 | E | K | EK | benign            |
| rs2233248 | NP_996821 | S | T | ST | benign            |
| rs2233248 | NP_996823 | S | T | ST | benign            |
| rs2233248 | NP_996822 | S | T | ST | benign            |
| rs2233249 | NP_996821 | P | H | PH | probably damaging |
| rs2233249 | NP_996823 | P | H | PH | probably damaging |
| rs2233249 | NP_996822 | P | H | PH | probably damaging |
| rs2233251 | NP_996821 | S | F | SF | benign            |
| rs2233251 | NP_996823 | S | F | SF | benign            |
| rs2233251 | NP_996822 | S | F | SF | possibly damaging |
| rs2233271 | NP_005958 | P | S | PS | possibly damaging |
| rs2233289 | NP_006049 | A | V | AV | benign            |
| rs2233290 | NP_006049 | P | A | PA | probably damaging |
| rs2233292 | NP_006049 | R | Q | RQ | benign            |

|           |           |   |   |    |                   |
|-----------|-----------|---|---|----|-------------------|
| rs2233295 | NP_006049 | A | V | AV | benign            |
| rs2233296 | NP_006049 | G | R | GR | probably damaging |
| rs2233306 | NP_006049 | P | L | PL | probably damaging |
| rs2233314 | NP_057254 | G | A | GA | benign            |
| rs2233318 | NP_006087 | H | R | HR | benign            |
| rs2233319 | NP_006087 | M | V | MV | benign            |
| rs2233328 | NP_006087 | M | L | ML | benign            |
| rs2233369 | NP_057512 | R | Q | RQ | benign            |
| rs2233384 | NP_005374 | S | R | SR | benign            |
| rs2233385 | NP_005374 | R | Q | RQ | benign            |
| rs2233390 | NP_005374 | A | T | AT | benign            |
| rs2233391 | NP_005374 | N | H | NH | benign            |
| rs2233393 | NP_005374 | R | Q | RQ | benign            |
| rs2233457 | NP_003937 | D | H | DH | possibly damaging |
| rs2233458 | NP_003937 | G | S | GS | possibly damaging |
| rs2233463 | NP_005778 | I | V | IV | benign            |
| rs2233466 | NP_005778 | A | V | AV | benign            |
| rs2233469 | NP_005778 | S | C | SC | benign            |
| rs2233510 | NP_733745 | G | R | GR | possibly damaging |
| rs2233510 | NP_005480 | G | R | GR | possibly damaging |
| rs2233511 | NP_733745 | P | S | PS | possibly damaging |
| rs2233511 | NP_005480 | P | S | PS | possibly damaging |
| rs2233522 | NP_002519 | A | T | AT | benign            |
| rs2233531 | NP_002475 | P | A | PA | probably damaging |
| rs2233546 | NP_006180 | R | W | RW | probably damaging |
| rs2233547 | NP_006180 | R | H | RH | possibly damaging |
| rs2233548 | NP_006180 | G | R | GR | possibly damaging |
| rs2233558 | NP_063950 | R | G | RG | probably damaging |
| rs2233559 | NP_063950 | V | M | VM | benign            |
| rs2233560 | NP_063950 | P | S | PS | benign            |
| rs2233561 | NP_063950 | T | I | TI | possibly damaging |
| rs2233563 | NP_063950 | R | H | RH | benign            |
| rs2233564 | NP_063950 | M | V | MV | benign            |
| rs2233565 | NP_063950 | T | A | TA | benign            |
| rs2233567 | NP_063950 | V | A | VA | benign            |
| rs2233569 | NP_063950 | Y | C | YC | possibly damaging |
| rs2233570 | NP_063950 | V | A | VA | benign            |
| rs2233578 | NP_006184 | R | W | RW | possibly damaging |
| rs2233580 | NP_006184 | R | H | RH | possibly damaging |
| rs2233591 | NP_037472 | F | L | FL | possibly damaging |
| rs2233592 | NP_037472 | L | F | LF | benign            |
| rs2233593 | NP_037472 | D | G | DG | possibly damaging |
| rs2233595 | NP_037472 | K | I | KI | possibly damaging |
| rs2233601 | NP_061752 | R | H | RH | benign            |
| rs2233601 | NP_115783 | R | H | RH | possibly damaging |
| rs2233603 | NP_115783 | G | S | GS | possibly damaging |

|           |           |   |   |    |                   |
|-----------|-----------|---|---|----|-------------------|
| rs2233603 | NP_061752 | G | S | GS | possibly damaging |
| rs2233605 | NP_061752 | P | Q | PQ | benign            |
| rs2233605 | NP_115783 | P | Q | PQ | probably damaging |
| rs2233608 | NP_115783 | A | V | AV | benign            |
| rs2233608 | NP_061752 | A | V | AV | possibly damaging |
| rs2233639 | NP_036523 | A | T | AT | benign            |
| rs2233640 | NP_036523 | P | R | PR | possibly damaging |
| rs2233641 | NP_036523 | V | A | VA | benign            |
| rs2233642 | NP_036523 | M | V | MV | benign            |
| rs2233665 | NP_002625 | R | L | RL | possibly damaging |
| rs2233701 | XP_376764 | E | K | EK | benign            |
| rs2233711 | NP_037400 | R | Q | RQ | possibly damaging |
| rs2233726 | NP_958505 | M | V | MV | possibly damaging |
| rs2233732 | NP_958505 | N | S | NS | benign            |
| rs2233764 | NP_060092 | A | V | AV | benign            |
| rs2233783 | NP_006252 | G | A | GA | benign            |
| rs2233785 | NP_006252 | G | E | GE | benign            |
| rs2233829 | NP_054731 | P | A | PA | benign            |
| rs2233833 | NP_054731 | E | Q | EQ | benign            |
| rs2233835 | NP_054731 | K | E | KE | benign            |
| rs2233843 | NP_000440 | A | T | AT | benign            |
| rs2233851 | NP_000440 | R | Q | RQ | benign            |
| rs2233854 | NP_000440 | P | R | PR | probably damaging |
| rs2233855 | NP_000440 | P | S | PS | possibly damaging |
| rs2233856 | NP_000440 | K | E | KE | benign            |
| rs2233868 | NP_005969 | C | S | CS | benign            |
| rs2233884 | NP_937782 | H | R | HR | possibly damaging |
| rs2233884 | NP_002998 | H | R | HR | possibly damaging |
| rs2233886 | NP_937782 | S | R | SR | benign            |
| rs2233886 | NP_002998 | S | R | SR | benign            |
| rs2233887 | NP_002998 | R | L | RL | benign            |
| rs2233896 | NP_002999 | Q | K | QK | possibly damaging |
| rs2233897 | NP_002999 | T | A | TA | benign            |
| rs2233899 | NP_002999 | A | V | AV | benign            |
| rs2233901 | NP_002999 | S | N | SN | benign            |
| rs2233903 | NP_002999 | H | Y | HY | probably damaging |
| rs2233914 | XP_376903 | P | L | PL | possibly damaging |
| rs2233915 | NP_001850 | P | A | PA | possibly damaging |
| rs2233916 | NP_001850 | T | S | TS | benign            |
| rs2233920 | NP_055126 | G | V | GV | possibly damaging |
| rs2233943 | NP_054787 | S | C | SC | benign            |
| rs2233944 | NP_054787 | A | S | AS | benign            |
| rs2233950 | NP_054788 | G | D | GD | benign            |
| rs2233951 | NP_054788 | G | S | GS | possibly damaging |
| rs2233952 | NP_054788 | P | L | PL | probably damaging |
| rs2233971 | NP_054789 | R | S | RS | benign            |

|           |           |   |   |    |                   |
|-----------|-----------|---|---|----|-------------------|
| rs2233974 | NP_054789 | L | F | LF | benign            |
| rs2233975 | NP_054789 | N | D | ND | benign            |
| rs2233976 | NP_054789 | G | R | GR | possibly damaging |
| rs2233977 | NP_054789 | V | A | VA | benign            |
| rs2233978 | NP_054789 | A | P | AP | benign            |
| rs2233982 | NP_054789 | M | I | MI | benign            |
| rs2233984 | NP_054789 | G | D | GD | possibly damaging |
| rs2233995 | NP_058640 | R | Q | RQ | benign            |
| rs2233997 | NP_058640 | Y | S | YS | probably damaging |
| rs2233998 | NP_058640 | F | S | FS | benign            |
| rs2233999 | NP_058640 | F | L | FL | benign            |
| rs2234000 | NP_058640 | T | M | TM | benign            |
| rs2234001 | NP_058640 | V | L | VL | benign            |
| rs2234002 | NP_058640 | S | N | SN | benign            |
| rs2234003 | NP_058640 | I | V | IV | benign            |
| rs2234013 | NP_061853 | G | S | GS | benign            |
| rs2234014 | NP_061853 | P | L | PL | probably damaging |
| rs2234015 | NP_061853 | R | Q | RQ | benign            |
| rs2234016 | NP_061853 | R | L | RL | possibly damaging |
| rs2234026 | NP_003183 | A | V | AV | benign            |
| rs2234027 | NP_003183 | P | S | PS | possibly damaging |
| rs2234028 | NP_003183 | P | S | PS | benign            |
| rs2234033 | NP_000345 | S | F | SF | possibly damaging |
| rs2234036 | NP_000345 | A | T | AT | benign            |
| rs2234045 | NP_061149 | G | A | GA | benign            |
| rs2234046 | NP_061149 | G | R | GR | possibly damaging |
| rs2234051 | NP_061149 | R | Q | RQ | benign            |
| rs2234079 | NP_057219 | P | L | PL | probably damaging |
| rs2234080 | NP_057219 | A | V | AV | benign            |
| rs2234084 | NP_057219 | P | L | PL | probably damaging |
| rs2234109 | NP_006396 | N | S | NS | benign            |
| rs2234112 | NP_006396 | L | V | LV | benign            |
| rs2234113 | NP_006396 | E | D | ED | benign            |
| rs2234121 | NP_066960 | R | Q | RQ | benign            |
| rs2234146 | NP_006282 | T | M | TM | benign            |
| rs2234163 | NP_003811 | A | T | AT | benign            |
| rs2234167 | NP_003811 | V | I | VI | benign            |
| rs2234174 | NP_003802 | A | T | AT | benign            |
| rs2234231 | NP_062545 | P | L | PL | probably damaging |
| rs2234232 | NP_062545 | C | Y | CY | possibly damaging |
| rs2234233 | NP_062545 | R | W | RW | probably damaging |
| rs2234237 | NP_061113 | T | S | TS | benign            |
| rs2234245 | NP_061113 | F | L | FL | benign            |
| rs2234252 | NP_061838 | A | V | AV | benign            |
| rs2234253 | NP_061838 | T | K | TK | possibly damaging |
| rs2234255 | NP_061838 | H | Y | HY | possibly damaging |

|           |           |   |   |    |                   |
|-----------|-----------|---|---|----|-------------------|
| rs2234256 | NP_061838 | L | P | LP | possibly damaging |
| rs2234266 | NP_005718 | M | V | MV | possibly damaging |
| rs2234267 | NP_005718 | S | F | SF | possibly damaging |
| rs2234268 | NP_005718 | V | M | VM | possibly damaging |
| rs2234278 | NP_005697 | H | P | HP | benign            |
| rs2234279 | NP_005697 | H | Q | HQ | possibly damaging |
| rs2234280 | NP_005697 | R | S | RS | possibly damaging |
| rs2234281 | NP_005697 | G | R | GR | probably damaging |
| rs2234283 | NP_005697 | H | P | HP | possibly damaging |
| rs2234284 | NP_005697 | E | G | EG | possibly damaging |
| rs2234296 | NP_620593 | V | M | VM | benign            |
| rs2234296 | NP_620591 | V | M | VM | benign            |
| rs2234301 | NP_620593 | A | T | AT | benign            |
| rs2234301 | NP_620591 | A | T | AT | benign            |
| rs2234302 | NP_620591 | R | Q | RQ | benign            |
| rs2234328 | NP_061816 | T | M | TM | probably damaging |
| rs2234331 | NP_061816 | A | V | AV | benign            |
| rs2234333 | NP_061816 | Q | R | QR | probably damaging |
| rs2234355 | NP_006555 | E | K | EK | benign            |
| rs2234356 | NP_006555 | K | N | KN | benign            |
| rs2234357 | NP_006555 | V | A | VA | benign            |
| rs2234365 | NP_055198 | R | L | RL | possibly damaging |
| rs2234366 | NP_055198 | R | C | RC | possibly damaging |
| rs2234367 | NP_055198 | S | L | SL | benign            |
| rs2234370 | NP_055198 | A | T | AT | benign            |
| rs2234373 | NP_055198 | C | Y | CY | probably damaging |
| rs2234377 | NP_003326 | A | T | AT | benign            |
| rs2234379 | NP_003326 | P | A | PA | possibly damaging |
| rs2234386 | NP_003326 | L | V | LV | benign            |
| rs2234387 | NP_003326 | H | R | HR | possibly damaging |
| rs2234444 | NP_059509 | R | M | RM | benign            |
| rs2234446 | NP_059509 | C | R | CR | possibly damaging |
| rs2234447 | NP_059509 | M | T | MT | benign            |
| rs2234449 | NP_059509 | N | D | ND | benign            |
| rs2234450 | NP_059509 | T | A | TA | benign            |
| rs2234451 | NP_059509 | T | S | TS | benign            |
| rs2234453 | NP_059509 | D | Y | DY | probably damaging |
| rs2234454 | NP_059509 | V | I | VI | benign            |
| rs2234455 | NP_059509 | M | T | MT | benign            |
| rs2234462 | NP_058634 | G | S | GS | benign            |
| rs2234469 | NP_058634 | Y | C | YC | probably damaging |
| rs2234496 | NP_036608 | R | G | RG | possibly damaging |
| rs2234498 | NP_036608 | L | P | LP | benign            |
| rs2234499 | NP_036608 | R | H | RH | benign            |
| rs2234500 | NP_036608 | P | R | PR | probably damaging |
| rs2234514 | NP_006361 | D | E | DE | benign            |

|           |           |   |   |    |                   |
|-----------|-----------|---|---|----|-------------------|
| rs2234520 | NP_998811 | A | S | AS | benign            |
| rs2234521 | NP_998811 | A | S | AS | benign            |
| rs2234522 | NP_998811 | A | V | AV | benign            |
| rs2234542 | XP_210826 | I | T | IT | benign            |
| rs2234547 | NP_387505 | H | D | HD | benign            |
| rs2234547 | NP_061836 | H | D | HD | possibly damaging |
| rs2234548 | NP_061836 | K | R | KR | benign            |
| rs2234548 | NP_387505 | K | R | KR | benign            |
| rs2234552 | NP_075447 | R | P | RP | probably damaging |
| rs2234552 | NP_060248 | R | P | RP | probably damaging |
| rs2234557 | NP_075447 | T | I | TI | benign            |
| rs2234557 | NP_060248 | T | I | TI | benign            |
| rs2234565 | NP_005654 | A | P | AP | benign            |
| rs2234569 | NP_005654 | S | A | SA | benign            |
| rs2234572 | NP_005654 | A | V | AV | benign            |
| rs2234573 | NP_005654 | T | M | TM | benign            |
| rs2234584 | NP_077742 | P | S | PS | benign            |
| rs2234584 | NP_077743 | P | S | PS | benign            |
| rs2234584 | NP_000369 | P | S | PS | benign            |
| rs2234584 | NP_077744 | P | S | PS | benign            |
| rs2234610 | NP_005099 | D | N | DN | benign            |
| rs2234611 | NP_005099 | S | R | SR | benign            |
| rs2234622 | NP_005099 | N | D | ND | benign            |
| rs2234625 | NP_005099 | S | L | SL | possibly damaging |
| rs2234627 | NP_005099 | V | M | VM | benign            |
| rs2234633 | NP_055394 | L | P | LP | possibly damaging |
| rs2234634 | NP_055394 | M | V | MV | benign            |
| rs2234636 | NP_055394 | L | F | LF | benign            |
| rs2234637 | NP_055394 | H | Y | HY | benign            |
| rs2234639 | NP_055394 | V | I | VI | benign            |
| rs2234641 | NP_077078 | D | N | DN | benign            |
| rs2234641 | NP_003285 | D | N | DN | benign            |
| rs2234671 | NP_000625 | S | T | ST | possibly damaging |
| rs2234675 | NP_852125 | T | K | TK | benign            |
| rs2234675 | NP_852126 | T | K | TK | benign            |
| rs2234675 | NP_852123 | T | K | TK | possibly damaging |
| rs2234675 | NP_852124 | T | K | TK | possibly damaging |
| rs2234675 | NP_852122 | T | K | TK | possibly damaging |
| rs2234697 | NP_000111 | R | C | RC | probably damaging |
| rs2234701 | NP_000111 | R | Q | RQ | benign            |
| rs2234703 | NP_001876 | S | Y | SY | benign            |
| rs2234704 | NP_001876 | P | L | PL | benign            |
| rs2234756 | NP_002066 | D | N | DN | possibly damaging |
| rs2234905 | NP_077078 | T | S | TS | benign            |
| rs2234905 | NP_003285 | T | S | TS | benign            |
| rs2234906 | NP_077078 | R | Q | RQ | benign            |



|           |           |   |   |    |                   |
|-----------|-----------|---|---|----|-------------------|
| rs2234906 | NP_003285 | R | Q | RQ | benign            |
| rs2234910 | NP_001034 | V | I | VI | benign            |
| rs2234916 | NP_751951 | T | A | TA | benign            |
| rs2234917 | NP_000288 | M | L | ML | benign            |
| rs2234919 | NP_000360 | P | T | PT | benign            |
| rs2234922 | NP_000111 | H | R | HR | benign            |
| rs2234925 | NP_000252 | Q | H | QH | benign            |
| rs2234926 | NP_000252 | R | K | RK | benign            |
| rs2234927 | NP_000252 | D | E | DE | benign            |
| rs2234933 | NP_001321 | A | T | AT | benign            |
| rs2234935 | NP_000043 | T | I | TI | possibly damaging |
| rs2234936 | NP_000043 | R | H | RH | benign            |
| rs2234938 | NP_000043 | I | V | IV | benign            |
| rs2234942 | NP_001230 | R | L | RL | benign            |
| rs2234947 | NP_000836 | R | Q | RQ | benign            |
| rs2234948 | NP_000836 | V | G | VG | possibly damaging |
| rs2234949 | NP_002425 | A | S | AS | benign            |
| rs2234951 | NP_000837 | P | S | PS | probably damaging |
| rs2234953 | NP_000844 | E | K | EK | probably damaging |
| rs2234955 | NP_001504 | N | H | NH | benign            |
| rs2234955 | NP_665877 | N | H | NH | benign            |
| rs2234955 | NP_665878 | N | H | NH | benign            |
| rs2234962 | NP_004272 | C | R | CR | benign            |
| rs2234972 | NP_000927 | F | L | FL | probably damaging |
| rs2234973 | NP_006220 | S | F | SF | probably damaging |
| rs2234997 | NP_000042 | D | E | DE | benign            |
| rs2234998 | NP_000042 | G | S | GS | benign            |
| rs2235000 | NP_000042 | G | D | GD | possibly damaging |
| rs2235002 | NP_000042 | A | S | AS | benign            |
| rs2235006 | NP_000042 | F | L | FL | possibly damaging |
| rs2235011 | NP_000042 | T | S | TS | benign            |
| rs2235036 | NP_000918 | A | T | AT | benign            |
| rs2235039 | NP_000918 | V | M | VM | benign            |
| rs2235058 | NP_002307 | S | F | SF | benign            |
| rs2235076 | NP_068775 | M | I | MI | benign            |
| rs2235171 | NP_055042 | A | T | AT | benign            |
| rs2235233 | XP_496799 | Q | R | QR | benign            |
| rs2235324 | NP_694564 | K | E | KE | benign            |
| rs2235324 | NP_705837 | K | E | KE | benign            |
| rs2235491 | NP_110404 | A | T | AT | benign            |
| rs2235501 | NP_001494 | L | V | LV | benign            |
| rs2235501 | NP_803436 | L | V | LV | benign            |
| rs2235542 | NP_000219 | N | D | ND | benign            |
| rs2235587 | NP_848693 | H | R | HR | benign            |
| rs2235624 | NP_057195 | R | Q | RQ | benign            |
| rs2235638 | NP_055529 | A | V | AV | benign            |

|           |           |   |   |    |                   |
|-----------|-----------|---|---|----|-------------------|
| rs2235730 | NP_009087 | Q | L | QL | possibly damaging |
| rs2235795 | NP_957704 | A | T | AT | benign            |
| rs2235937 | NP_573438 | N | S | NS | benign            |
| rs2235937 | NP_573439 | N | S | NS | benign            |
| rs2235937 | NP_005695 | N | S | NS | benign            |
| rs2235940 | NP_573438 | T | N | TN | possibly damaging |
| rs2235940 | NP_573439 | T | N | TN | possibly damaging |
| rs2235940 | NP_005695 | T | N | TN | possibly damaging |
| rs2235967 | NP_056161 | C | Y | CY | benign            |
| rs2236005 | NP_115997 | Q | R | QR | benign            |
| rs2236144 | NP_078980 | R | S | RS | benign            |
| rs2236145 | NP_078980 | G | R | GR | benign            |
| rs2236194 | NP_690603 | A | D | AD | benign            |
| rs2236200 | NP_543023 | L | R | LR | possibly damaging |
| rs2236225 | NP_005947 | Q | R | QR | benign            |
| rs2236235 | XP_375087 | R | Q | RQ | benign            |
| rs2236264 | NP_005597 | I | V | IV | benign            |
| rs2236316 | NP_057434 | P | A | PA | benign            |
| rs2236316 | NP_065972 | P | A | PA | benign            |
| rs2236316 | NP_891989 | P | A | PA | benign            |
| rs2236316 | NP_891990 | P | A | PA | benign            |
| rs2236316 | NP_891991 | P | A | PA | benign            |
| rs2236338 | NP_004122 | Y | H | YH | possibly damaging |
| rs2236344 | NP_060418 | V | L | VL | benign            |
| rs2236358 | NP_444280 | M | V | MV | benign            |
| rs2236359 | NP_444280 | R | G | RG | benign            |
| rs2236364 | NP_652761 | S | C | SC | benign            |
| rs2236364 | NP_057332 | S | C | SC | possibly damaging |
| rs2236369 | NP_004819 | P | S | PS | benign            |
| rs2236379 | NP_006248 | P | L | PL | benign            |
| rs2236387 | NP_060295 | E | K | EK | benign            |
| rs2236405 | NP_000255 | T | S | TS | benign            |
| rs2236410 | NP_001522 | H | R | HR | benign            |
| rs2236426 | NP_064504 | R | K | RK | benign            |
| rs2236426 | NP_078901 | R | K | RK | benign            |
| rs2236493 | NP_055041 | Q | R | QR | benign            |
| rs2236639 | NP_055221 | W | R | WR | possibly damaging |
| rs2236654 | NP_002171 | R | W | RW | possibly damaging |
| rs2236695 | NP_071398 | T | S | TS | benign            |
| rs2236700 | NP_005904 | F | L | FL | benign            |
| rs2236722 | NP_000094 | W | R | WR | possibly damaging |
| rs2236722 | NP_112503 | W | R | WR | possibly damaging |
| rs2236729 | NP_542942 | E | A | EA | possibly damaging |
| rs2236770 | NP_000291 | L | F | LF | benign            |
| rs2237051 | NP_001954 | I | M | IM | benign            |
| rs2237857 | NP_004620 | T | I | TI | benign            |

|           |           |   |   |    |                   |
|-----------|-----------|---|---|----|-------------------|
| rs2238472 | NP_001162 | R | Q | RQ | benign            |
| rs2238549 | NP_005026 | E | A | EA | benign            |
| rs2238731 | NP_057419 | V | M | VM | benign            |
| rs2238892 | NP_001821 | Q | H | QH | possibly damaging |
| rs2239170 | NP_958850 | V | L | VL | benign            |
| rs2239359 | NP_000126 | S | G | SG | benign            |
| rs2239435 | NP_689410 | I | V | IV | benign            |
| rs2239435 | NP_689412 | I | V | IV | benign            |
| rs2239435 | NP_689409 | I | V | IV | benign            |
| rs2239671 | NP_000287 | T | A | TA | benign            |
| rs2239710 | NP_066293 | I | T | IT | benign            |
| rs2239785 | NP_003652 | E | K | EK | benign            |
| rs2239785 | NP_663318 | E | K | EK | benign            |
| rs2239785 | NP_663319 | E | K | EK | benign            |
| rs2239808 | NP_775833 | S | T | ST | benign            |
| rs2239819 | NP_003276 | A | S | AS | benign            |
| rs2239896 | NP_055622 | R | W | RW | possibly damaging |
| rs2240017 | NP_037483 | H | Q | HQ | possibly damaging |
| rs2240038 | XP_371200 | A | T | AT | benign            |
| rs2240040 | XP_371200 | V | A | VA | benign            |
| rs2240089 | NP_056013 | H | Q | HQ | benign            |
| rs2240090 | NP_056013 | V | I | VI | benign            |
| rs2240154 | XP_290850 | T | M | TM | benign            |
| rs2240157 | XP_290850 | W | R | WR | benign            |
| rs2240158 | XP_290850 | T | M | TM | benign            |
| rs2240197 | NP_066957 | G | S | GS | possibly damaging |
| rs2240227 | NP_039226 | L | I | LI | benign            |
| rs2240228 | NP_039226 | V | M | VM | benign            |
| rs2240229 | NP_039226 | S | N | SN | benign            |
| rs2240240 | NP_056234 | E | D | ED | benign            |
| rs2240297 | NP_149014 | A | T | AT | benign            |
| rs2240308 | NP_004646 | S | P | SP | probably damaging |
| rs2240345 | NP_777635 | D | E | DE | benign            |
| rs2240359 | XP_069623 | A | V | AV | benign            |
| rs2240370 | NP_733787 | S | L | SL | benign            |
| rs2240423 | NP_005868 | D | E | DE | benign            |
| rs2240424 | NP_114439 | E | D | ED | benign            |
| rs2240424 | NP_055138 | E | D | ED | benign            |
| rs2240425 | NP_114439 | D | E | DE | benign            |
| rs2240425 | NP_055138 | D | E | DE | benign            |
| rs2240426 | NP_114439 | I | S | IS | benign            |
| rs2240426 | NP_055138 | I | S | IS | benign            |
| rs2240543 | NP_055963 | L | S | LS | benign            |
| rs2240694 | NP_061729 | C | Y | CY | possibly damaging |
| rs2240694 | NP_113685 | C | Y | CY | probably damaging |
| rs2240695 | NP_113598 | C | F | CF | probably damaging |

|           |           |   |   |    |                   |
|-----------|-----------|---|---|----|-------------------|
| rs2240695 | NP_061723 | C | F | CF | probably damaging |
| rs2240696 | NP_061723 | Y | C | YC | benign            |
| rs2240696 | NP_113598 | Y | C | YC | probably damaging |
| rs2240697 | NP_115268 | N | K | NK | benign            |
| rs2240697 | NP_061747 | N | K | NK | possibly damaging |
| rs2240698 | NP_114476 | L | F | LF | possibly damaging |
| rs2240698 | NP_061743 | L | F | LF | possibly damaging |
| rs2240717 | NP_001661 | V | A | VA | benign            |
| rs2240751 | NP_778148 | Y | H | YH | possibly damaging |
| rs2240858 | NP_005922 | R | C | RC | benign            |
| rs2240871 | NP_055680 | S | T | ST | benign            |
| rs2240953 | NP_005085 | G | S | GS | benign            |
| rs2240961 | NP_004477 | R | G | RG | probably damaging |
| rs2241002 | NP_055022 | P | L | PL | probably damaging |
| rs2241012 | NP_005928 | A | T | AT | benign            |
| rs2241029 | XP_496488 | S | N | SN | benign            |
| rs2241057 | NP_063938 | L | S | LS | benign            |
| rs2241088 | NP_005018 | R | S | RS | benign            |
| rs2241091 | NP_036484 | G | C | GC | possibly damaging |
| rs2241221 | XP_495913 | K | R | KR | benign            |
| rs2241230 | NP_699165 | T | S | TS | benign            |
| rs2241230 | NP_878315 | T | S | TS | benign            |
| rs2241268 | NP_009131 | G | S | GS | benign            |
| rs2241268 | NP_658913 | G | S | GS | benign            |
| rs2241268 | NP_006729 | G | S | GS | benign            |
| rs2241314 | XP_376203 | H | R | HR | benign            |
| rs2241371 | NP_291027 | D | G | DG | possibly damaging |
| rs2241371 | NP_963921 | D | G | DG | possibly damaging |
| rs2241384 | NP_036408 | P | L | PL | probably damaging |
| rs2241414 | XP_375358 | T | A | TA | benign            |
| rs2241433 | NP_060422 | S | G | SG | benign            |
| rs2241481 | NP_005103 | I | V | IV | benign            |
| rs2241481 | NP_059830 | I | V | IV | benign            |
| rs2241559 | NP_057285 | G | S | GS | benign            |
| rs2241571 | NP_064613 | T | A | TA | benign            |
| rs2241571 | NP_955469 | T | A | TA | benign            |
| rs2241571 | NP_955471 | T | A | TA | benign            |
| rs2241571 | NP_955470 | T | A | TA | benign            |
| rs2241586 | NP_775801 | S | A | SA | benign            |
| rs2241621 | NP_149095 | S | A | SA | benign            |
| rs2241625 | NP_116755 | M | T | MT | benign            |
| rs2241625 | NP_116754 | M | T | MT | benign            |
| rs2241625 | NP_116753 | M | T | MT | benign            |
| rs2241626 | NP_116751 | M | T | MT | benign            |
| rs2241626 | NP_116750 | M | T | MT | benign            |
| rs2241626 | NP_116749 | M | T | MT | benign            |

|           |           |   |   |    |                   |
|-----------|-----------|---|---|----|-------------------|
| rs2241626 | NP_055337 | M | T | MT | benign            |
| rs2241627 | NP_116755 | E | K | EK | benign            |
| rs2241627 | NP_116754 | E | K | EK | benign            |
| rs2241627 | NP_116753 | E | K | EK | benign            |
| rs2241628 | NP_116751 | C | R | CR | benign            |
| rs2241628 | NP_116750 | C | R | CR | benign            |
| rs2241628 | NP_116749 | C | R | CR | benign            |
| rs2241628 | NP_055337 | C | R | CR | benign            |
| rs2241647 | NP_065104 | Q | R | QR | benign            |
| rs2241666 | NP_127490 | R | G | RG | possibly damaging |
| rs2241666 | NP_008988 | R | G | RG | possibly damaging |
| rs2241714 | NP_085055 | M | I | MI | benign            |
| rs2241764 | NP_001499 | A | V | AV | benign            |
| rs2241788 | NP_570602 | H | R | HR | possibly damaging |
| rs2241797 | NP_004248 | H | R | HR | benign            |
| rs2241880 | NP_110430 | T | A | TA | benign            |
| rs2241880 | NP_060444 | T | A | TA | benign            |
| rs2241883 | NP_001434 | T | A | TA | benign            |
| rs2241935 | XP_292624 | Y | H | YH | benign            |
| rs2241980 | NP_005201 | R | T | RT | probably damaging |
| rs2242030 | XP_045907 | R | Q | RQ | benign            |
| rs2242046 | NP_004204 | D | N | DN | benign            |
| rs2242047 | NP_004204 | R | C | RC | possibly damaging |
| rs2242072 | NP_066269 | F | L | FL | benign            |
| rs2242089 | NP_075566 | V | M | VM | benign            |
| rs2242090 | NP_075566 | K | N | KN | benign            |
| rs2242093 | NP_055932 | M | I | MI | benign            |
| rs2242182 | NP_003466 | R | Q | RQ | benign            |
| rs2242183 | NP_003466 | P | A | PA | possibly damaging |
| rs2242190 | NP_002372 | E | D | ED | benign            |
| rs2242206 | NP_919274 | T | K | TK | benign            |
| rs2242241 | NP_958728 | S | A | SA | benign            |
| rs2242373 | NP_689812 | R | H | RH | benign            |
| rs2242471 | NP_060585 | C | S | CS | benign            |
| rs2242518 | NP_005044 | Q | R | QR | possibly damaging |
| rs2242616 | XP_370765 | Q | H | QH | possibly damaging |
| rs2242637 | NP_476431 | R | Q | RQ | benign            |
| rs2242637 | NP_476432 | R | Q | RQ | benign            |
| rs2242653 | NP_067069 | R | K | RK | benign            |
| rs2242665 | NP_116183 | I | V | IV | benign            |
| rs2242665 | NP_079533 | I | V | IV | benign            |
| rs2242801 | XP_371413 | C | F | CF | probably damaging |
| rs2242802 | XP_371413 | P | L | PL | probably damaging |
| rs2242956 | NP_620573 | M | T | MT | benign            |
| rs2242956 | NP_620572 | M | T | MT | possibly damaging |
| rs2242956 | NP_620571 | M | T | MT | probably damaging |

|           |           |   |   |    |                   |
|-----------|-----------|---|---|----|-------------------|
| rs2242956 | NP_620574 | M | T | MT | probably damaging |
| rs2242956 | NP_620575 | M | T | MT | probably damaging |
| rs2242956 | NP_000401 | M | T | MT | probably damaging |
| rs2243062 | NP_005233 | R | Q | RQ | benign            |
| rs2243083 | NP_005233 | T | A | TA | benign            |
| rs2243191 | NP_037503 | F | S | FS | benign            |
| rs2243191 | NP_715639 | F | S | FS | benign            |
| rs2243365 | NP_002260 | P | S | PS | benign            |
| rs2243380 | NP_002935 | R | Q | RQ | benign            |
| rs2243518 | NP_004054 | E | K | EK | benign            |
| rs2243525 | NP_006490 | R | S | RS | benign            |
| rs2243525 | NP_963837 | R | S | RS | benign            |
| rs2243525 | NP_963838 | R | S | RS | benign            |
| rs2243525 | NP_963839 | R | S | RS | benign            |
| rs2243563 | XP_496849 | G | R | GR | possibly damaging |
| rs2243603 | NP_006056 | P | A | PA | possibly damaging |
| rs2243639 | NP_003010 | A | T | AT | benign            |
| rs2244008 | NP_000417 | T | A | TA | benign            |
| rs2244438 | NP_055864 | T | I | TI | possibly damaging |
| rs2244494 | XP_085463 | Q | R | QR | benign            |
| rs2245203 | NP_149034 | I | V | IV | benign            |
| rs2245220 | NP_036541 | T | M | TM | benign            |
| rs2245231 | NP_079131 | V | I | VI | benign            |
| rs2245408 | XP_291001 | R | Q | RQ | benign            |
| rs2245803 | NP_004762 | K | T | KT | benign            |
| rs2245898 | NP_671731 | N | T | NT | benign            |
| rs2246614 | NP_060187 | S | R | SR | possibly damaging |
| rs2246614 | NP_112554 | S | R | SR | possibly damaging |
| rs2246614 | NP_068743 | S | R | SR | possibly damaging |
| rs2246901 | NP_004523 | A | S | AS | benign            |
| rs2246901 | NP_612154 | A | S | AS | benign            |
| rs2246945 | NP_057245 | A | D | AD | benign            |
| rs2247114 | NP_004165 | R | C | RC | probably damaging |
| rs2248128 | NP_057195 | Q | R | QR | benign            |
| rs2248250 | XP_497781 | T | M | TM | benign            |
| rs2248470 | XP_497781 | A | T | AT | benign            |
| rs2248484 | XP_497781 | R | W | RW | benign            |
| rs2248490 | NP_387510 | K | N | KN | benign            |
| rs2248609 | NP_689841 | Q | R | QR | benign            |
| rs2248821 | XP_029438 | R | Q | RQ | benign            |
| rs2249060 | NP_006022 | T | I | TI | benign            |
| rs2249187 | NP_116755 | V | A | VA | benign            |
| rs2249187 | NP_116754 | V | A | VA | benign            |
| rs2249187 | NP_116753 | V | A | VA | benign            |
| rs2249265 | NP_004249 | V | M | VM | benign            |
| rs2249323 | XP_085234 | Q | E | QE | benign            |

|           |           |   |   |    |                   |
|-----------|-----------|---|---|----|-------------------|
| rs2249464 | XP_373419 | W | R | WR | benign            |
| rs2249542 | NP_060616 | G | E | GE | possibly damaging |
| rs2249778 | NP_065577 | T | A | TA | benign            |
| rs2249778 | NP_065578 | T | A | TA | benign            |
| rs2249778 | NP_065579 | T | A | TA | benign            |
| rs2250242 | NP_110394 | P | S | PS | benign            |
| rs2250377 | NP_937792 | M | I | MI | benign            |
| rs2250860 | NP_852611 | S | N | SN | benign            |
| rs2250889 | NP_004985 | P | R | PR | possibly damaging |
| rs2250918 | NP_056507 | V | I | VI | benign            |
| rs2251220 | XP_371956 | S | L | SL | benign            |
| rs2251660 | NP_663629 | C | W | CW | probably damaging |
| rs2252755 | NP_056108 | A | G | AG | benign            |
| rs2252755 | NP_598411 | A | G | AG | benign            |
| rs2252755 | NP_892006 | A | G | AG | benign            |
| rs2252755 | NP_149062 | G | A | GA | benign            |
| rs2252784 | NP_002828 | K | R | KR | benign            |
| rs2252816 | NP_065228 | M | V | MV | benign            |
| rs2252863 | XP_373419 | A | T | AT | benign            |
| rs2252996 | NP_060814 | I | V | IV | benign            |
| rs2253427 | NP_006056 | M | I | MI | benign            |
| rs2253563 | NP_037388 | C | W | CW | probably damaging |
| rs2253680 | NP_078898 | V | M | VM | benign            |
| rs2253849 | NP_998822 | S | N | SN | benign            |
| rs2253849 | NP_015567 | S | N | SN | benign            |
| rs2253849 | NP_998823 | S | N | SN | benign            |
| rs2253874 | XP_371111 | Q | R | QR | benign            |
| rs2254174 | NP_689923 | Q | R | QR | benign            |
| rs2254419 | NP_060079 | G | S | GS | benign            |
| rs2254524 | NP_002331 | L | V | LV | benign            |
| rs2254562 | NP_982271 | K | R | KR | benign            |
| rs2254562 | NP_003886 | K | R | KR | benign            |
| rs2254796 | NP_056380 | L | S | LS | benign            |
| rs2255243 | NP_003913 | A | G | AG | benign            |
| rs2255255 | NP_057736 | T | A | TA | benign            |
| rs2255258 | NP_057736 | Q | H | QH | benign            |
| rs2255317 | NP_002371 | T | M | TM | benign            |
| rs2255317 | NP_085072 | T | M | TM | benign            |
| rs2255336 | NP_031386 | A | T | AT | benign            |
| rs2255543 | NP_000178 | H | Q | HQ | probably damaging |
| rs2255607 | NP_056449 | G | S | GS | benign            |
| rs2255703 | NP_055918 | M | V | MV | benign            |
| rs2255991 | NP_036545 | R | W | RW | possibly damaging |
| rs2256100 | NP_478107 | P | L | PL | benign            |
| rs2256100 | NP_478114 | P | L | PL | benign            |
| rs2256100 | NP_478108 | P | L | PL | probably damaging |

|           |              |   |   |    |                   |
|-----------|--------------|---|---|----|-------------------|
| rs2256238 | NP_005648    | P | L | PL | probably damaging |
| rs2256408 | XP_058513    | R | H | RH | benign            |
| rs2256721 | NP_970615    | V | G | VG | benign            |
| rs2256734 | NP_002209    | M | I | MI | possibly damaging |
| rs2256871 | NP_000762    | H | R | HR | probably damaging |
| rs2256979 | XP_496887    | G | W | GW | possibly damaging |
| rs2257020 | NP_851321    | T | A | TA | benign            |
| rs2257167 | NP_000620    | V | L | VL | benign            |
| rs2257205 | NP_060233    | R | H | RH | benign            |
| rs2257212 | NP_066568    | L | F | LF | benign            |
| rs2257295 | NP_067018    | V | I | VI | benign            |
| rs2257401 | NP_000756    | T | R | TR | benign            |
| rs2257440 | NP_116575    | C | R | CR | possibly damaging |
| rs2257505 | NP_714917    | T | S | TS | benign            |
| rs2257573 | XP_497069    | A | E | AE | benign            |
| rs2257596 | XP_375931    | N | D | ND | benign            |
| rs2257858 | NP_775808    | K | R | KR | benign            |
| rs2257858 | XP_371925    | R | K | RK | benign            |
| rs2257859 | NP_775808    | D | N | DN | benign            |
| rs2257859 | XP_371925    | N | D | ND | benign            |
| rs2257861 | XP_371925    | L | S | LS | benign            |
| rs2257861 | NP_775808    | S | L | SL | benign            |
| rs2257936 | NP_055427    | S | L | SL | benign            |
| rs2258139 | NP_982283    | L | P | LP | benign            |
| rs2258139 | NP_077719    | P | L | PL | benign            |
| rs2258218 | NP_000583    | G | D | GD | possibly damaging |
| rs2258218 | NP_001002029 | G | D | GD | possibly damaging |
| rs2258425 | NP_003543    | Q | R | QR | benign            |
| rs2258470 | NP_859063    | R | H | RH | possibly damaging |
| rs2258495 | NP_003543    | T | M | TM | benign            |
| rs2258557 | NP_076415    | E | G | EG | possibly damaging |
| rs2258689 | NP_058519    | H | Y | HY | benign            |
| rs2258704 | NP_851421    | R | Q | RQ | benign            |
| rs2258704 | NP_851422    | R | Q | RQ | benign            |
| rs2258704 | NP_055818    | R | Q | RQ | benign            |
| rs2258704 | XP_496064    | R | Q | RQ | benign            |
| rs2258957 | NP_055474    | R | Q | RQ | benign            |
| rs2258977 | XP_496159    | V | A | VA | benign            |
| rs2258983 | NP_055256    | A | E | AE | possibly damaging |
| rs2259102 | NP_004523    | I | M | IM | benign            |
| rs2259102 | NP_612154    | I | M | IM | benign            |
| rs2259292 | NP_004523    | D | G | DG | possibly damaging |
| rs2259292 | NP_612154    | D | G | DG | possibly damaging |
| rs2259332 | NP_620125    | A | V | AV | benign            |
| rs2259332 | NP_997193    | V | A | VA | benign            |
| rs2259527 | XP_292982    | D | N | DN | benign            |



|           |           |   |   |    |                   |
|-----------|-----------|---|---|----|-------------------|
| rs2259528 | XP_292982 | S | T | ST | benign            |
| rs2259593 | NP_004671 | S | I | SI | benign            |
| rs2259593 | NP_733841 | S | I | SI | benign            |
| rs2259684 | XP_496900 | R | G | RG | possibly damaging |
| rs2260034 | XP_497240 | R | Q | RQ | benign            |
| rs2260335 | NP_060375 | A | T | AT | benign            |
| rs2260545 | NP_065178 | R | Q | RQ | benign            |
| rs2260655 | NP_056348 | A | T | AT | benign            |
| rs2261015 | XP_496891 | G | V | GV | probably damaging |
| rs2261015 | NP_060734 | G | V | GV | probably damaging |
| rs2261144 | NP_000755 | M | T | MT | benign            |
| rs2261144 | NP_085079 | M | T | MT | probably damaging |
| rs2261212 | XP_290401 | P | L | PL | benign            |
| rs2261212 | XP_496895 | L | P | LP | probably damaging |
| rs2261398 | NP_997195 | S | G | SG | benign            |
| rs2261757 | XP_376101 | A | T | AT | benign            |
| rs2261758 | XP_376101 | E | K | EK | benign            |
| rs2261816 | NP_954586 | K | E | KE | benign            |
| rs2261835 | XP_376554 | S | A | SA | benign            |
| rs2262065 | NP_036444 | K | E | KE | benign            |
| rs2266607 | NP_002425 | Y | H | YH | benign            |
| rs2266631 | NP_000837 | V | A | VA | benign            |
| rs2266633 | NP_000844 | D | N | DN | benign            |
| rs2266635 | NP_000844 | A | T | AT | benign            |
| rs2266637 | NP_000844 | V | I | VI | benign            |
| rs2266690 | NP_001230 | V | A | VA | benign            |
| rs2266691 | NP_001230 | K | R | KR | benign            |
| rs2266780 | NP_008825 | E | G | EG | benign            |
| rs2266782 | NP_008825 | E | K | EK | benign            |
| rs2266879 | NP_005384 | V | I | VI | benign            |
| rs2266988 | NP_006106 | W | R | WR | probably damaging |
| rs2267161 | NP_004852 | V | M | VM | benign            |
| rs2267586 | NP_008931 | S | A | SA | benign            |
| rs2269371 | NP_002901 | D | G | DG | possibly damaging |
| rs2269383 | NP_689453 | G | D | GD | probably damaging |
| rs2269383 | NP_689452 | G | D | GD | probably damaging |
| rs2269409 | NP_068768 | I | M | IM | benign            |
| rs2269428 | NP_061978 | P | H | PH | benign            |
| rs2269429 | NP_061978 | G | S | GS | possibly damaging |
| rs2269432 | NP_036323 | R | W | RW | possibly damaging |
| rs2269452 | NP_001431 | L | P | LP | possibly damaging |
| rs2269495 | NP_077285 | V | A | VA | benign            |
| rs2269497 | NP_937870 | N | S | NS | benign            |
| rs2269497 | NP_940832 | N | S | NS | benign            |
| rs2269497 | NP_002917 | N | S | NS | benign            |
| rs2269497 | NP_937873 | N | S | NS | benign            |

|           |           |   |   |    |                   |
|-----------|-----------|---|---|----|-------------------|
| rs2269497 | NP_940989 | N | S | NS | benign            |
| rs2269529 | NP_002464 | I | V | IV | benign            |
| rs2269548 | NP_061830 | S | F | SF | benign            |
| rs2269611 | NP_005444 | G | E | GE | possibly damaging |
| rs2269619 | NP_660157 | E | A | EA | possibly damaging |
| rs2269714 | NP_001754 | I | T | IT | benign            |
| rs2269715 | NP_001754 | W | C | WC | probably damaging |
| rs2269782 | XP_372616 | N | S | NS | benign            |
| rs2269782 | XP_497491 | N | S | NS | benign            |
| rs2269859 | NP_056330 | V | I | VI | benign            |
| rs2269961 | NP_777635 | R | H | RH | possibly damaging |
| rs2269966 | NP_061330 | S | T | ST | benign            |
| rs2269970 | NP_006339 | L | F | LF | benign            |
| rs2269970 | NP_859422 | L | F | LF | benign            |
| rs2270004 | NP_689481 | N | S | NS | benign            |
| rs2270090 | NP_061980 | G | R | GR | possibly damaging |
| rs2270182 | NP_006166 | N | I | NI | possibly damaging |
| rs2270182 | NP_932326 | N | I | NI | possibly damaging |
| rs2270191 | NP_054789 | V | M | VM | benign            |
| rs2270234 | NP_067053 | P | A | PA | probably damaging |
| rs2270234 | NP_733751 | P | A | PA | probably damaging |
| rs2270253 | NP_065943 | V | A | VA | benign            |
| rs2270286 | NP_077014 | W | S | WS | probably damaging |
| rs2270439 | NP_003930 | P | H | PH | possibly damaging |
| rs2270439 | NP_378663 | P | H | PH | possibly damaging |
| rs2270493 | NP_689670 | T | S | TS | benign            |
| rs2270495 | NP_689670 | G | R | GR | benign            |
| rs2270515 | NP_055447 | R | Q | RQ | benign            |
| rs2270518 | NP_981956 | L | F | LF | benign            |
| rs2270523 | NP_001861 | A | S | AS | benign            |
| rs2270565 | NP_068605 | M | L | ML | benign            |
| rs2270569 | NP_071737 | V | I | VI | benign            |
| rs2270569 | NP_878906 | V | I | VI | benign            |
| rs2270569 | NP_878905 | V | I | VI | benign            |
| rs2270577 | NP_055285 | P | R | PR | probably damaging |
| rs2270581 | NP_005328 | S | L | SL | possibly damaging |
| rs2270627 | NP_006135 | W | L | WL | probably damaging |
| rs2270637 | NP_003044 | S | T | ST | benign            |
| rs2270641 | NP_003044 | T | P | TP | benign            |
| rs2270655 | NP_758454 | Q | H | QH | benign            |
| rs2270716 | NP_061937 | L | V | LV | benign            |
| rs2270724 | NP_061937 | S | C | SC | possibly damaging |
| rs2270738 | NP_005370 | F | L | FL | probably damaging |
| rs2270802 | XP_371783 | E | A | EA | benign            |
| rs2270802 | NP_775934 | E | A | EA | benign            |
| rs2270812 | NP_060342 | P | L | PL | benign            |

|           |           |   |   |    |                   |
|-----------|-----------|---|---|----|-------------------|
| rs2270877 | XP_035825 | G | R | GR | benign            |
| rs2270889 | NP_055693 | R | Q | RQ | benign            |
| rs2270891 | NP_055693 | V | L | VL | benign            |
| rs2270898 | NP_004937 | T | S | TS | benign            |
| rs2270915 | NP_000899 | N | D | ND | benign            |
| rs2270927 | XP_043493 | T | S | TS | possibly damaging |
| rs2270941 | NP_055290 | S | N | SN | benign            |
| rs2270945 | NP_003314 | E | K | EK | benign            |
| rs2270950 | NP_005206 | H | L | HL | probably damaging |
| rs2270962 | NP_060764 | C | Y | CY | benign            |
| rs2270968 | NP_064551 | P | H | PH | benign            |
| rs2270976 | NP_060595 | V | I | VI | benign            |
| rs2271001 | NP_061901 | K | R | KR | benign            |
| rs2271011 | NP_031374 | D | G | DG | benign            |
| rs2271023 | NP_004053 | H | Y | HY | possibly damaging |
| rs2271024 | NP_004053 | L | F | LF | benign            |
| rs2271038 | NP_659429 | T | I | TI | benign            |
| rs2271041 | NP_001289 | E | K | EK | benign            |
| rs2271042 | NP_005206 | L | R | LR | possibly damaging |
| rs2271051 | XP_290592 | V | M | VM | benign            |
| rs2271075 | NP_036564 | N | S | NS | benign            |
| rs2271077 | NP_473451 | H | Y | HY | possibly damaging |
| rs2271087 | NP_003232 | E | D | ED | benign            |
| rs2271092 | NP_001639 | E | K | EK | benign            |
| rs2271111 | NP_079216 | Q | R | QR | benign            |
| rs2271129 | NP_061193 | G | R | GR | probably damaging |
| rs2271129 | NP_665899 | G | R | GR | probably damaging |
| rs2271129 | NP_665900 | G | R | GR | probably damaging |
| rs2271129 | NP_665898 | G | R | GR | probably damaging |
| rs2271130 | NP_061193 | A | D | AD | benign            |
| rs2271130 | NP_665899 | A | D | AD | benign            |
| rs2271130 | NP_665900 | A | D | AD | benign            |
| rs2271130 | NP_665898 | A | D | AD | benign            |
| rs2271188 | NP_001973 | R | H | RH | benign            |
| rs2271207 | NP_055665 | I | V | IV | benign            |
| rs2271211 | NP_055059 | V | M | VM | benign            |
| rs2271232 | NP_954590 | R | H | RH | benign            |
| rs2271232 | NP_059993 | R | H | RH | benign            |
| rs2271233 | NP_444515 | V | I | VI | benign            |
| rs2271251 | NP_114033 | A | G | AG | benign            |
| rs2271251 | NP_114034 | A | G | AG | benign            |
| rs2271251 | NP_114035 | A | G | AG | benign            |
| rs2271251 | NP_002365 | A | G | AG | benign            |
| rs2271255 | NP_005397 | K | E | KE | benign            |
| rs2271260 | NP_005594 | R | H | RH | possibly damaging |
| rs2271272 | NP_055852 | E | K | EK | benign            |

|           |           |   |   |    |                   |
|-----------|-----------|---|---|----|-------------------|
| rs2271275 | NP_061172 | A | T | AT | benign            |
| rs2271284 | NP_057726 | E | K | EK | benign            |
| rs2271290 | NP_037373 | E | G | EG | possibly damaging |
| rs2271291 | NP_037373 | S | C | SC | benign            |
| rs2271298 | NP_061938 | L | V | LV | benign            |
| rs2271336 | NP_054859 | T | M | TM | benign            |
| rs2271376 | NP_620712 | I | T | IT | possibly damaging |
| rs2271381 | NP_002340 | E | D | ED | benign            |
| rs2271395 | NP_060647 | T | A | TA | benign            |
| rs2271412 | NP_612402 | A | D | AD | benign            |
| rs2271416 | NP_002637 | R | Q | RQ | benign            |
| rs2271437 | NP_004203 | L | W | LW | possibly damaging |
| rs2271458 | NP_665702 | N | H | NH | benign            |
| rs2271460 | NP_001072 | F | C | FC | probably damaging |
| rs2271462 | NP_001072 | G | S | GS | possibly damaging |
| rs2271488 | NP_919269 | D | N | DN | benign            |
| rs2271496 | NP_060169 | V | M | VM | benign            |
| rs2271502 | NP_079199 | V | A | VA | benign            |
| rs2271503 | NP_079199 | P | L | PL | probably damaging |
| rs2271505 | NP_079199 | M | I | MI | benign            |
| rs2271570 | NP_775758 | S | L | SL | benign            |
| rs2271589 | NP_443750 | Y | H | YH | benign            |
| rs2271615 | NP_071800 | A | G | AG | benign            |
| rs2271615 | NP_064593 | A | G | AG | benign            |
| rs2271627 | NP_001738 | R | H | RH | possibly damaging |
| rs2271637 | NP_060034 | L | V | LV | benign            |
| rs2271652 | NP_001763 | V | L | VL | benign            |
| rs2271694 | NP_116186 | D | N | DN | benign            |
| rs2271703 | NP_062824 | R | G | RG | benign            |
| rs2271704 | NP_775760 | P | L | PL | probably damaging |
| rs2271708 | NP_000578 | C | R | CR | probably damaging |
| rs2271725 | NP_036343 | Q | K | QK | benign            |
| rs2271733 | NP_038463 | D | E | DE | benign            |
| rs2271761 | NP_689733 | S | G | SG | benign            |
| rs2271777 | NP_036250 | H | Y | HY | possibly damaging |
| rs2271796 | NP_004715 | I | M | IM | benign            |
| rs2271815 | NP_631917 | R | C | RC | possibly damaging |
| rs2271822 | NP_004078 | A | V | AV | possibly damaging |
| rs2271841 | NP_597723 | E | Q | EQ | possibly damaging |
| rs2271848 | NP_005447 | T | I | TI | benign            |
| rs2271849 | XP_096472 | Q | H | QH | benign            |
| rs2271851 | NP_689525 | R | C | RC | probably damaging |
| rs2271885 | NP_004687 | N | H | NH | benign            |
| rs2271900 | NP_073620 | S | N | SN | benign            |
| rs2271904 | NP_009196 | D | G | DG | probably damaging |
| rs2271933 | NP_001516 | I | V | IV | benign            |

|           |           |   |   |    |                   |
|-----------|-----------|---|---|----|-------------------|
| rs2271980 | NP_006288 | V | M | VM | benign            |
| rs2271989 | XP_371662 | L | F | LF | benign            |
| rs2271990 | XP_371662 | V | I | VI | benign            |
| rs2272011 | NP_003684 | A | V | AV | benign            |
| rs2272011 | NP_663325 | A | V | AV | benign            |
| rs2272011 | NP_663327 | A | V | AV | benign            |
| rs2272022 | NP_005935 | P | T | PT | benign            |
| rs2272058 | XP_114222 | V | I | VI | benign            |
| rs2272070 | NP_919224 | R | W | RW | probably damaging |
| rs2272070 | NP_919303 | R | W | RW | probably damaging |
| rs2272070 | NP_919304 | R | W | RW | probably damaging |
| rs2272070 | NP_004793 | R | W | RW | probably damaging |
| rs2272094 | NP_062550 | R | K | RK | benign            |
| rs2272095 | NP_038474 | L | V | LV | benign            |
| rs2272193 | NP_690042 | A | V | AV | benign            |
| rs2272263 | NP_061167 | T | P | TP | benign            |
| rs2272296 | NP_003569 | T | I | TI | benign            |
| rs2272330 | NP_004659 | Q | H | QH | possibly damaging |
| rs2272343 | NP_036579 | T | P | TP | benign            |
| rs2272428 | NP_006421 | I | V | IV | benign            |
| rs2272487 | NP_115719 | A | S | AS | benign            |
| rs2272495 | NP_060641 | A | V | AV | benign            |
| rs2272522 | NP_006605 | L | F | LF | benign            |
| rs2272571 | NP_057323 | G | R | GR | benign            |
| rs2272583 | XP_495998 | F | S | FS | benign            |
| rs2272593 | NP_004629 | P | L | PL | probably damaging |
| rs2272593 | NP_542417 | P | L | PL | probably damaging |
| rs2272605 | NP_002199 | A | S | AS | benign            |
| rs2272606 | NP_002199 | Q | R | QR | benign            |
| rs2272610 | NP_055444 | T | S | TS | benign            |
| rs2272629 | NP_057317 | V | M | VM | benign            |
| rs2272639 | NP_079517 | N | S | NS | possibly damaging |
| rs2272641 | NP_004892 | K | E | KE | benign            |
| rs2272662 | NP_570901 | A | T | AT | benign            |
| rs2272665 | NP_078831 | Q | H | QH | benign            |
| rs2272665 | NP_036294 | Q | H | QH | benign            |
| rs2272704 | NP_005174 | A | V | AV | benign            |
| rs2272720 | NP_003961 | L | V | LV | benign            |
| rs2272722 | NP_077271 | I | V | IV | benign            |
| rs2272736 | NP_001547 | R | Q | RQ | benign            |
| rs2272739 | NP_060286 | D | Y | DY | possibly damaging |
| rs2272753 | NP_055932 | S | T | ST | benign            |
| rs2272761 | XP_114618 | V | M | VM | benign            |
| rs2272792 | NP_444281 | R | Q | RQ | benign            |
| rs2272797 | XP_371326 | V | I | VI | benign            |
| rs2272829 | NP_203744 | P | L | PL | probably damaging |

|           |           |   |   |    |                   |
|-----------|-----------|---|---|----|-------------------|
| rs2272830 | NP_061881 | G | R | GR | probably damaging |
| rs2272837 | NP_061868 | Q | R | QR | benign            |
| rs2272843 | NP_061868 | A | E | AE | benign            |
| rs2272846 | NP_113642 | T | N | TN | benign            |
| rs2272852 | NP_113642 | E | K | EK | benign            |
| rs2272859 | NP_005151 | V | M | VM | benign            |
| rs2272881 | NP_055568 | R | H | RH | possibly damaging |
| rs2272898 | NP_478072 | E | Q | EQ | benign            |
| rs2272902 | NP_036397 | T | M | TM | benign            |
| rs2272906 | NP_005814 | V | M | VM | benign            |
| rs2272920 | NP_060656 | A | S | AS | benign            |
| rs2272925 | NP_001513 | Q | H | QH | benign            |
| rs2272938 | NP_060476 | R | S | RS | benign            |
| rs2272955 | NP_852611 | M | T | MT | benign            |
| rs2272962 | NP_942094 | E | D | ED | benign            |
| rs2272994 | NP_075558 | C | Y | CY | probably damaging |
| rs2272996 | NP_004657 | N | S | NS | possibly damaging |
| rs2273056 | NP_057736 | S | T | ST | benign            |
| rs2273058 | NP_057736 | F | L | FL | benign            |
| rs2273063 | NP_659464 | R | H | RH | benign            |
| rs2273073 | NP_001191 | S | A | SA | benign            |
| rs2273074 | NP_001191 | A | T | AT | possibly damaging |
| rs2273075 | NP_002522 | V | I | VI | benign            |
| rs2273086 | NP_004767 | G | S | GS | possibly damaging |
| rs2273137 | NP_006383 | I | V | IV | benign            |
| rs2273148 | NP_066363 | T | A | TA | benign            |
| rs2273171 | NP_055389 | N | S | NS | benign            |
| rs2273183 | NP_004230 | E | A | EA | possibly damaging |
| rs2273186 | NP_004230 | E | A | EA | possibly damaging |
| rs2273204 | NP_002763 | E | K | EK | benign            |
| rs2273221 | XP_291344 | Q | R | QR | benign            |
| rs2273238 | XP_376519 | T | M | TM | benign            |
| rs2273268 | NP_000027 | E | K | EK | benign            |
| rs2273285 | NP_000293 | A | S | AS | benign            |
| rs2273343 | NP_631947 | H | R | HR | probably damaging |
| rs2273343 | NP_006601 | H | R | HR | probably damaging |
| rs2273346 | NP_006601 | V | A | VA | benign            |
| rs2273367 | XP_371257 | R | K | RK | benign            |
| rs2273373 | NP_062539 | T | I | TI | possibly damaging |
| rs2273411 | NP_006199 | N | S | NS | possibly damaging |
| rs2273430 | NP_031387 | G | V | GV | possibly damaging |
| rs2273499 | NP_783202 | V | M | VM | benign            |
| rs2273499 | NP_060679 | V | M | VM | benign            |
| rs2273510 | NP_056254 | P | L | PL | probably damaging |
| rs2273526 | NP_116781 | H | Q | HQ | probably damaging |
| rs2273535 | NP_003591 | F | I | FI | benign            |

|           |           |   |   |    |                   |
|-----------|-----------|---|---|----|-------------------|
| rs2273535 | NP_940835 | F | I | FI | benign            |
| rs2273535 | NP_940836 | F | I | FI | benign            |
| rs2273535 | NP_940837 | F | I | FI | benign            |
| rs2273535 | NP_940838 | F | I | FI | benign            |
| rs2273535 | NP_940839 | F | I | FI | benign            |
| rs2273549 | NP_060863 | R | K | RK | benign            |
| rs2273566 | NP_068759 | A | V | AV | benign            |
| rs2273607 | NP_003827 | V | M | VM | benign            |
| rs2273613 | NP_006286 | N | S | NS | benign            |
| rs2273621 | NP_065228 | R | G | RG | probably damaging |
| rs2273633 | XP_377338 | G | R | GR | benign            |
| rs2273660 | NP_060205 | Y | C | YC | probably damaging |
| rs2273664 | NP_060205 | R | H | RH | benign            |
| rs2273668 | NP_055269 | L | I | LI | benign            |
| rs2273697 | NP_000383 | V | I | VI | benign            |
| rs2273709 | NP_055904 | H | P | HP | benign            |
| rs2273730 | NP_037421 | R | T | RT | benign            |
| rs2273731 | NP_037421 | P | S | PS | benign            |
| rs2273783 | NP_005050 | P | Q | PQ | possibly damaging |
| rs2273783 | NP_604390 | P | Q | PQ | probably damaging |
| rs2273783 | NP_008842 | P | Q | PQ | probably damaging |
| rs2273800 | XP_496006 | H | R | HR | benign            |
| rs2273801 | XP_496006 | K | R | KR | benign            |
| rs2273821 | NP_054880 | R | Q | RQ | benign            |
| rs2273837 | NP_054764 | R | W | RW | possibly damaging |
| rs2273863 | NP_006490 | D | Y | DY | benign            |
| rs2273863 | NP_963839 | D | Y | DY | benign            |
| rs2273872 | NP_005637 | N | S | NS | benign            |
| rs2273880 | NP_112196 | M | T | MT | benign            |
| rs2273906 | XP_375105 | P | S | PS | possibly damaging |
| rs2273914 | NP_001940 | E | D | ED | benign            |
| rs2273916 | NP_055438 | P | S | PS | possibly damaging |
| rs2273947 | NP_932349 | L | M | LM | possibly damaging |
| rs2273959 | NP_536737 | V | M | VM | benign            |
| rs2273970 | NP_004472 | V | M | VM | benign            |
| rs2273980 | NP_060045 | H | R | HR | benign            |
| rs2273983 | NP_060598 | N | S | NS | benign            |
| rs2273986 | NP_057593 | S | P | SP | possibly damaging |
| rs2274016 | NP_003834 | R | K | RK | benign            |
| rs2274016 | NP_659001 | R | K | RK | benign            |
| rs2274059 | NP_005757 | H | R | HR | benign            |
| rs2274064 | NP_000424 | K | R | KR | benign            |
| rs2274067 | NP_689592 | V | L | VL | benign            |
| rs2274068 | XP_170749 | T | A | TA | benign            |
| rs2274073 | NP_891556 | V | M | VM | benign            |
| rs2274083 | NP_003995 | E | G | EG | benign            |

|           |           |   |   |    |                   |
|-----------|-----------|---|---|----|-------------------|
| rs2274084 | NP_003995 | V | I | VI | benign            |
| rs2274110 | NP_877428 | K | R | KR | benign            |
| rs2274110 | NP_060988 | K | R | KR | benign            |
| rs2274136 | NP_005115 | A | T | AT | benign            |
| rs2274139 | NP_612428 | R | I | RI | probably damaging |
| rs2274158 | NP_056219 | N | K | NK | benign            |
| rs2274159 | NP_056219 | V | A | VA | benign            |
| rs2274188 | NP_036315 | V | L | VL | benign            |
| rs2274217 | NP_006532 | P | S | PS | benign            |
| rs2274254 | NP_004249 | R | H | RH | benign            |
| rs2274260 | NP_057062 | T | M | TM | possibly damaging |
| rs2274268 | NP_115750 | A | P | AP | benign            |
| rs2274271 | NP_055565 | E | G | EG | benign            |
| rs2274285 | NP_113619 | S | N | SN | benign            |
| rs2274305 | NP_057440 | G | S | GS | benign            |
| rs2274315 | NP_005911 | P | S | PS | possibly damaging |
| rs2274327 | NP_001206 | T | M | TM | benign            |
| rs2274328 | NP_001206 | M | L | ML | benign            |
| rs2274329 | NP_001206 | G | A | GA | possibly damaging |
| rs2274333 | NP_001206 | G | S | GS | benign            |
| rs2274367 | NP_563578 | E | K | EK | benign            |
| rs2274367 | NP_563579 | E | K | EK | benign            |
| rs2274367 | NP_002829 | E | K | EK | benign            |
| rs2274407 | NP_005836 | K | N | KN | benign            |
| rs2274419 | NP_005583 | M | I | MI | benign            |
| rs2274420 | NP_002429 | Q | R | QR | benign            |
| rs2274432 | NP_443197 | G | D | GD | benign            |
| rs2274435 | NP_060658 | G | D | GD | benign            |
| rs2274467 | NP_055478 | T | N | TN | benign            |
| rs2274496 | NP_002520 | G | S | GS | benign            |
| rs2274516 | NP_000278 | V | I | VI | benign            |
| rs2274531 | NP_005805 | D | N | DN | benign            |
| rs2274540 | XP_371254 | G | S | GS | benign            |
| rs2274567 | NP_000564 | H | R | HR | benign            |
| rs2274567 | NP_000642 | H | R | HR | possibly damaging |
| rs2274616 | NP_003628 | R | Q | RQ | benign            |
| rs2274618 | NP_003628 | R | H | RH | benign            |
| rs2274648 | NP_003820 | G | R | GR | possibly damaging |
| rs2274654 | XP_088578 | V | A | VA | benign            |
| rs2274658 | NP_005579 | V | L | VL | benign            |
| rs2274670 | NP_073597 | Q | H | QH | benign            |
| rs2274702 | XP_371338 | W | G | WG | probably damaging |
| rs2274703 | XP_371338 | R | C | RC | probably damaging |
| rs2274718 | NP_031394 | R | H | RH | possibly damaging |
| rs2274736 | NP_008970 | A | V | AV | benign            |
| rs2274741 | XP_374779 | F | L | FL | benign            |



|           |           |   |   |    |                   |
|-----------|-----------|---|---|----|-------------------|
| rs2274750 | NP_002151 | A | T | AT | benign            |
| rs2274756 | NP_004985 | R | Q | RQ | benign            |
| rs2274797 | NP_037528 | P | L | PL | possibly damaging |
| rs2274802 | NP_006438 | Q | H | QH | benign            |
| rs2274810 | XP_038664 | E | K | EK | benign            |
| rs2274827 | NP_005064 | R | C | RC | probably damaging |
| rs2274828 | NP_005064 | V | I | VI | benign            |
| rs2274848 | NP_113647 | T | A | TA | benign            |
| rs2274850 | NP_000867 | G | R | GR | possibly damaging |
| rs2274866 | NP_002495 | P | Q | PQ | possibly damaging |
| rs2274870 | NP_056284 | R | Q | RQ | possibly damaging |
| rs2274896 | NP_056393 | R | Q | RQ | possibly damaging |
| rs2274904 | NP_660301 | F | C | FC | benign            |
| rs2274907 | NP_060095 | V | D | VD | possibly damaging |
| rs2274911 | NP_683766 | S | P | SP | benign            |
| rs2274922 | NP_060132 | N | D | ND | benign            |
| rs2274924 | NP_060132 | K | E | KE | benign            |
| rs2274934 | NP_005551 | D | N | DN | benign            |
| rs2274961 | NP_001846 | P | L | PL | probably damaging |
| rs2274974 | NP_005948 | G | E | GE | probably damaging |
| rs2274976 | NP_005948 | Q | R | QR | benign            |
| rs2275010 | NP_005475 | I | T | IT | possibly damaging |
| rs2275014 | NP_878918 | A | V | AV | benign            |
| rs2275047 | NP_068378 | G | A | GA | benign            |
| rs2275060 | XP_166125 | S | L | SL | benign            |
| rs2275137 | NP_006050 | P | H | PH | probably damaging |
| rs2275140 | NP_006050 | S | G | SG | benign            |
| rs2275166 | NP_000076 | E | K | EK | benign            |
| rs2275237 | NP_848514 | P | L | PL | possibly damaging |
| rs2275237 | NP_001659 | P | L | PL | possibly damaging |
| rs2275249 | NP_004275 | S | C | SC | possibly damaging |
| rs2275253 | NP_970615 | I | V | IV | benign            |
| rs2275254 | NP_970615 | F | S | FS | probably damaging |
| rs2275260 | NP_001490 | I | V | IV | benign            |
| rs2275272 | NP_002851 | T | I | TI | possibly damaging |
| rs2275289 | NP_671488 | R | W | RW | possibly damaging |
| rs2275303 | NP_065859 | G | S | GS | benign            |
| rs2275307 | NP_065859 | A | T | AT | benign            |
| rs2275344 | NP_009200 | R | Q | RQ | benign            |
| rs2275349 | NP_000665 | V | L | VL | benign            |
| rs2275363 | NP_002876 | T | A | TA | benign            |
| rs2275381 | NP_115805 | R | W | RW | probably damaging |
| rs2275402 | NP_055862 | F | L | FL | possibly damaging |
| rs2275408 | NP_057575 | L | V | LV | benign            |
| rs2275438 | NP_660289 | T | R | TR | benign            |
| rs2275443 | NP_689416 | M | I | MI | benign            |

|           |           |   |   |    |                   |
|-----------|-----------|---|---|----|-------------------|
| rs2275445 | NP_057068 | A | P | AP | benign            |
| rs2275462 | NP_055978 | F | L | FL | benign            |
| rs2275477 | NP_659484 | G | R | GR | possibly damaging |
| rs2275481 | NP_002861 | N | S | NS | benign            |
| rs2275531 | NP_002635 | G | S | GS | benign            |
| rs2275554 | NP_689540 | Q | R | QR | benign            |
| rs2275558 | NP_002576 | G | S | GS | benign            |
| rs2275580 | NP_055994 | S | G | SG | benign            |
| rs2275586 | NP_071757 | G | A | GA | possibly damaging |
| rs2275591 | NP_079160 | L | R | LR | possibly damaging |
| rs2275592 | NP_056499 | L | P | LP | benign            |
| rs2275596 | NP_742108 | P | S | PS | benign            |
| rs2275596 | NP_742111 | P | S | PS | possibly damaging |
| rs2275596 | NP_742110 | P | S | PS | possibly damaging |
| rs2275601 | NP_919424 | T | A | TA | benign            |
| rs2275603 | NP_116127 | S | G | SG | benign            |
| rs2275660 | NP_006428 | A | T | AT | benign            |
| rs2275687 | XP_375853 | E | G | EG | benign            |
| rs2275689 | XP_375853 | N | S | NS | benign            |
| rs2275697 | NP_005067 | A | T | AT | benign            |
| rs2275720 | NP_001100 | L | F | LF | benign            |
| rs2275725 | NP_001100 | R | W | RW | possibly damaging |
| rs2275768 | NP_057205 | F | V | FV | benign            |
| rs2275774 | XP_374765 | K | R | KR | benign            |
| rs2275799 | NP_006166 | A | T | AT | benign            |
| rs2275799 | NP_932326 | A | T | AT | benign            |
| rs2275801 | NP_898868 | V | A | VA | benign            |
| rs2275801 | NP_898869 | V | A | VA | benign            |
| rs2275801 | NP_036540 | V | A | VA | benign            |
| rs2275807 | NP_055717 | R | Q | RQ | benign            |
| rs2275807 | NP_892118 | R | Q | RQ | possibly damaging |
| rs2275824 | XP_375682 | L | I | LI | benign            |
| rs2275831 | XP_375682 | A | V | AV | benign            |
| rs2275839 | NP_689705 | W | R | WR | probably damaging |
| rs2275848 | NP_004139 | D | A | DA | possibly damaging |
| rs2275857 | NP_006171 | A | P | AP | benign            |
| rs2275866 | NP_005549 | T | S | TS | benign            |
| rs2275902 | XP_371262 | A | G | AG | benign            |
| rs2275950 | NP_115977 | K | E | KE | possibly damaging |
| rs2275984 | NP_004112 | R | K | RK | benign            |
| rs2275992 | NP_739574 | S | G | SG | benign            |
| rs2275992 | NP_444251 | S | G | SG | benign            |
| rs2275996 | NP_002171 | E | K | EK | benign            |
| rs2276036 | NP_073733 | P | S | PS | benign            |
| rs2276038 | NP_002550 | A | V | AV | benign            |
| rs2276050 | NP_938057 | M | V | MV | probably damaging |

|           |           |   |   |    |                   |
|-----------|-----------|---|---|----|-------------------|
| rs2276053 | NP_055437 | R | K | RK | benign            |
| rs2276054 | NP_055437 | S | I | SI | benign            |
| rs2276081 | NP_006491 | G | S | GS | benign            |
| rs2276089 | NP_112222 | L | S | LS | benign            |
| rs2276092 | XP_113962 | V | I | VI | benign            |
| rs2276093 | NP_002418 | A | V | AV | benign            |
| rs2276102 | NP_075069 | R | G | RG | benign            |
| rs2276113 | NP_892007 | K | R | KR | benign            |
| rs2276118 | NP_112481 | Q | R | QR | benign            |
| rs2276118 | NP_057450 | Q | R | QR | benign            |
| rs2276211 | NP_031371 | S | L | SL | benign            |
| rs2276231 | NP_057514 | R | S | RS | possibly damaging |
| rs2276231 | NP_710148 | R | S | RS | possibly damaging |
| rs2276231 | NP_710149 | R | S | RS | possibly damaging |
| rs2276282 | NP_000251 | E | K | EK | possibly damaging |
| rs2276288 | NP_000251 | C | S | CS | benign            |
| rs2276295 | NP_938149 | R | Q | RQ | benign            |
| rs2276295 | NP_055425 | R | Q | RQ | benign            |
| rs2276295 | NP_938148 | R | Q | RQ | possibly damaging |
| rs2276296 | NP_938149 | R | W | RW | probably damaging |
| rs2276296 | NP_055425 | R | W | RW | probably damaging |
| rs2276296 | NP_938148 | R | W | RW | probably damaging |
| rs2276314 | NP_113634 | A | T | AT | benign            |
| rs2276331 | NP_004351 | L | V | LV | probably damaging |
| rs2276348 | NP_079045 | R | H | RH | benign            |
| rs2276360 | NP_060631 | V | L | VL | benign            |
| rs2276374 | NP_073588 | T | M | TM | benign            |
| rs2276403 | NP_002423 | H | Y | HY | possibly damaging |
| rs2276405 | NP_004824 | E | K | EK | benign            |
| rs2276409 | XP_370660 | P | S | PS | possibly damaging |
| rs2276415 | NP_766627 | G | S | GS | benign            |
| rs2276427 | NP_006542 | V | A | VA | benign            |
| rs2276444 | NP_001124 | T | S | TS | benign            |
| rs2276449 | XP_496518 | P | L | PL | possibly damaging |
| rs2276634 | NP_076990 | Q | H | QH | benign            |
| rs2276635 | NP_076990 | S | G | SG | benign            |
| rs2276650 | NP_644672 | R | P | RP | possibly damaging |
| rs2276691 | NP_071937 | A | T | AT | benign            |
| rs2276717 | XP_035946 | G | R | GR | probably damaging |
| rs2276724 | NP_036322 | S | G | SG | benign            |
| rs2276724 | NP_658989 | S | G | SG | benign            |
| rs2276742 | NP_001448 | V | M | VM | benign            |
| rs2276749 | NP_055482 | M | I | MI | benign            |
| rs2276752 | NP_056014 | A | T | AT | probably damaging |
| rs2276761 | NP_443728 | R | Q | RQ | benign            |
| rs2276774 | NP_061860 | I | T | IT | benign            |

|           |           |   |   |    |                   |
|-----------|-----------|---|---|----|-------------------|
| rs2276781 | NP_061860 | M | T | MT | benign            |
| rs2276782 | NP_061860 | V | D | VD | probably damaging |
| rs2276790 | NP_005920 | R | W | RW | possibly damaging |
| rs2276800 | NP_057015 | P | L | PL | probably damaging |
| rs2276802 | NP_055222 | L | V | LV | benign            |
| rs2276802 | NP_741979 | L | V | LV | benign            |
| rs2276802 | NP_741980 | L | V | LV | benign            |
| rs2276802 | NP_741981 | L | V | LV | benign            |
| rs2276804 | NP_000403 | C | R | CR | probably damaging |
| rs2276806 | NP_073600 | M | V | MV | probably damaging |
| rs2276810 | NP_000983 | V | L | VL | benign            |
| rs2276812 | NP_690909 | R | H | RH | benign            |
| rs2276814 | NP_002209 | Q | L | QL | possibly damaging |
| rs2276833 | NP_064548 | I | T | IT | possibly damaging |
| rs2276853 | NP_878905 | W | R | WR | benign            |
| rs2276853 | NP_878906 | W | R | WR | possibly damaging |
| rs2276853 | NP_071737 | R | W | RW | probably damaging |
| rs2276872 | NP_937839 | A | P | AP | benign            |
| rs2276872 | NP_005807 | A | P | AP | benign            |
| rs2276904 | XP_042661 | R | H | RH | benign            |
| rs2276922 | XP_496727 | P | L | PL | probably damaging |
| rs2276924 | XP_496727 | H | R | HR | benign            |
| rs2276932 | XP_496719 | M | V | MV | possibly damaging |
| rs2276970 | NP_060170 | M | V | MV | benign            |
| rs2276973 | NP_001050 | K | R | KR | benign            |
| rs2276976 | NP_849155 | F | C | FC | probably damaging |
| rs2276995 | NP_079126 | T | A | TA | benign            |
| rs2277044 | NP_079143 | K | N | KN | benign            |
| rs2277046 | NP_001360 | T | A | TA | benign            |
| rs2277079 | NP_116249 | K | R | KR | benign            |
| rs2277106 | NP_071368 | F | L | FL | probably damaging |
| rs2277106 | NP_110437 | F | L | FL | probably damaging |
| rs2277119 | NP_057677 | R | H | RH | possibly damaging |
| rs2277168 | NP_073592 | R | W | RW | probably damaging |
| rs2277170 | NP_073592 | L | F | LF | benign            |
| rs2277240 | NP_004397 | P | S | PS | benign            |
| rs2277244 | NP_060049 | H | Y | HY | benign            |
| rs2277244 | NP_015568 | H | Y | HY | benign            |
| rs2277244 | NP_004397 | H | Y | HY | possibly damaging |
| rs2277257 | NP_060814 | G | R | GR | benign            |
| rs2277269 | NP_932341 | R | Q | RQ | benign            |
| rs2277301 | NP_663613 | A | T | AT | benign            |
| rs2277301 | NP_065947 | A | T | AT | benign            |
| rs2277319 | NP_079055 | A | G | AG | benign            |
| rs2277330 | NP_002264 | R | W | RW | benign            |
| rs2277339 | NP_000937 | D | A | DA | probably damaging |

|           |           |   |   |    |                   |
|-----------|-----------|---|---|----|-------------------|
| rs2277413 | NP_002855 | V | A | VA | benign            |
| rs2277415 | NP_060886 | P | S | PS | possibly damaging |
| rs2277447 | NP_000044 | E | K | EK | benign            |
| rs2277476 | XP_375067 | W | G | WG | probably damaging |
| rs2277531 | NP_079441 | Q | E | QE | benign            |
| rs2277549 | NP_055087 | R | H | RH | benign            |
| rs2277552 | NP_078781 | R | H | RH | benign            |
| rs2277553 | NP_078781 | K | N | KN | benign            |
| rs2277577 | NP_004204 | R | G | RG | possibly damaging |
| rs2277577 | NP_964014 | R | G | RG | probably damaging |
| rs2277596 | NP_149017 | M | V | MV | possibly damaging |
| rs2277598 | NP_149017 | I | T | IT | possibly damaging |
| rs2277600 | NP_004800 | G | A | GA | possibly damaging |
| rs2277611 | NP_054799 | R | Q | RQ | benign            |
| rs2277619 | NP_036580 | A | V | AV | benign            |
| rs2277649 | NP_060003 | G | D | GD | probably damaging |
| rs2277658 | NP_001363 | Q | H | QH | possibly damaging |
| rs2277666 | NP_653284 | R | Q | RQ | benign            |
| rs2277680 | NP_071342 | V | A | VA | benign            |
| rs2277712 | NP_055587 | P | L | PL | probably damaging |
| rs2277714 | NP_765975 | H | Y | HY | possibly damaging |
| rs2277714 | NP_765977 | H | Y | HY | possibly damaging |
| rs2277714 | NP_765978 | H | Y | HY | possibly damaging |
| rs2277714 | NP_006153 | H | Y | HY | possibly damaging |
| rs2277716 | XP_371116 | K | R | KR | benign            |
| rs2277754 | NP_003191 | G | R | GR | benign            |
| rs2277759 | NP_899069 | P | L | PL | benign            |
| rs2277759 | NP_899067 | P | L | PL | probably damaging |
| rs2277798 | NP_061834 | S | G | SG | benign            |
| rs2277800 | NP_061834 | L | F | LF | benign            |
| rs2277809 | NP_004919 | T | I | TI | benign            |
| rs2277833 | XP_036729 | N | S | NS | benign            |
| rs2277838 | NP_005437 | R | H | RH | benign            |
| rs2277841 | NP_079231 | S | N | SN | benign            |
| rs2277846 | NP_113676 | R | W | RW | probably damaging |
| rs2277848 | NP_997400 | R | H | RH | possibly damaging |
| rs2277849 | NP_997400 | L | F | LF | benign            |
| rs2277901 | NP_071375 | Q | P | QP | benign            |
| rs2277902 | NP_071375 | S | F | SF | benign            |
| rs2277921 | XP_371146 | P | L | PL | possibly damaging |
| rs2277922 | XP_371146 | T | P | TP | possibly damaging |
| rs2277998 | NP_999841 | D | N | DN | benign            |
| rs2277998 | NP_999840 | D | N | DN | benign            |
| rs2278008 | NP_055139 | E | K | EK | benign            |
| rs2278022 | XP_375375 | S | P | SP | possibly damaging |
| rs2278023 | XP_375375 | K | E | KE | benign            |

|           |           |   |   |    |                   |
|-----------|-----------|---|---|----|-------------------|
| rs2278106 | NP_004431 | P | S | PS | benign            |
| rs2278107 | NP_004431 | I | V | IV | benign            |
| rs2278154 | XP_058931 | Q | R | QR | benign            |
| rs2278161 | NP_060705 | Y | H | YH | probably damaging |
| rs2278240 | NP_705838 | G | R | GR | possibly damaging |
| rs2278287 | NP_954672 | R | Q | RQ | benign            |
| rs2278287 | NP_057669 | R | Q | RQ | benign            |
| rs2278329 | NP_003990 | D | N | DN | benign            |
| rs2278339 | NP_005206 | I | M | IM | benign            |
| rs2278358 | NP_742066 | R | K | RK | benign            |
| rs2278370 | NP_001438 | G | S | GS | benign            |
| rs2278371 | NP_001438 | V | M | VM | benign            |
| rs2278415 | NP_067645 | R | S | RS | benign            |
| rs2278420 | NP_067645 | L | P | LP | benign            |
| rs2278426 | NP_061157 | R | W | RW | possibly damaging |
| rs2278428 | NP_004820 | K | Q | KQ | benign            |
| rs2278542 | NP_000883 | A | E | AE | benign            |
| rs2278586 | NP_683765 | L | V | LV | benign            |
| rs2278692 | NP_009049 | D | E | DE | benign            |
| rs2278831 | NP_003821 | F | S | FS | benign            |
| rs2278842 | NP_057196 | V | I | VI | benign            |
| rs2278868 | NP_003717 | S | G | SG | benign            |
| rs2278911 | NP_065941 | R | Q | RQ | benign            |
| rs2278943 | NP_002817 | A | S | AS | benign            |
| rs2278970 | NP_000490 | A | G | AG | benign            |
| rs2279027 | XP_376314 | S | P | SP | probably damaging |
| rs2279102 | XP_209918 | P | R | PR | probably damaging |
| rs2279103 | NP_004706 | T | M | TM | benign            |
| rs2279103 | NP_430255 | T | M | TM | benign            |
| rs2279105 | NP_848590 | T | M | TM | benign            |
| rs2279112 | NP_002505 | R | Q | RQ | benign            |
| rs2279218 | NP_055704 | P | L | PL | probably damaging |
| rs2279219 | NP_055704 | I | M | IM | benign            |
| rs2279252 | NP_714928 | R | Q | RQ | benign            |
| rs2279269 | NP_115536 | P | S | PS | benign            |
| rs2279279 | NP_036577 | V | L | VL | benign            |
| rs2279333 | NP_078896 | S | N | SN | benign            |
| rs2279343 | NP_000758 | K | R | KR | possibly damaging |
| rs2279374 | NP_536739 | P | L | PL | probably damaging |
| rs2279381 | NP_001437 | T | M | TM | benign            |
| rs2279542 | NP_068367 | P | R | PR | benign            |
| rs2279542 | NP_057435 | P | R | PR | benign            |
| rs2279542 | NP_068368 | P | R | PR | benign            |
| rs2279542 | NP_068369 | P | R | PR | probably damaging |
| rs2279574 | NP_001937 | V | L | VL | benign            |
| rs2279574 | NP_073143 | V | L | VL | benign            |

|           |              |   |   |    |                   |
|-----------|--------------|---|---|----|-------------------|
| rs2279587 | NP_852478    | V | I | VI | benign            |
| rs2279961 | NP_872372    | T | S | TS | benign            |
| rs2280016 | NP_057726    | D | G | DG | possibly damaging |
| rs2280084 | NP_079199    | R | L | RL | benign            |
| rs2280085 | NP_079199    | P | A | PA | benign            |
| rs2280090 | NP_694882    | P | S | PS | probably damaging |
| rs2280090 | NP_079496    | P | S | PS | probably damaging |
| rs2280091 | NP_694882    | M | T | MT | possibly damaging |
| rs2280091 | NP_079496    | M | T | MT | possibly damaging |
| rs2280099 | NP_663761    | H | R | HR | probably damaging |
| rs2280132 | NP_000538    | A | S | AS | benign            |
| rs2280132 | NP_783650    | A | S | AS | benign            |
| rs2280132 | NP_783651    | A | S | AS | benign            |
| rs2280132 | NP_783652    | A | S | AS | benign            |
| rs2280133 | NP_004305    | R | H | RH | benign            |
| rs2280134 | NP_004305    | P | L | PL | probably damaging |
| rs2280205 | NP_064425    | P | L | PL | benign            |
| rs2280205 | NP_001001290 | P | L | PL | benign            |
| rs2280250 | NP_079179    | G | E | GE | possibly damaging |
| rs2280279 | NP_055874    | A | T | AT | benign            |
| rs2280289 | NP_071894    | L | P | LP | benign            |
| rs2280490 | XP_113912    | S | L | SL | possibly damaging |
| rs2280560 | NP_919260    | P | S | PS | probably damaging |
| rs2280786 | NP_663629    | H | R | HR | possibly damaging |
| rs2280838 | NP_570901    | T | A | TA | benign            |
| rs2280843 | NP_057474    | I | T | IT | possibly damaging |
| rs2280896 | NP_003961    | L | F | LF | benign            |
| rs2280962 | NP_443189    | T | I | TI | benign            |
| rs2281042 | NP_115896    | K | N | KN | benign            |
| rs2281066 | XP_496342    | S | C | SC | benign            |
| rs2281180 | NP_996991    | H | Q | HQ | benign            |
| rs2281180 | NP_004310    | H | Q | HQ | benign            |
| rs2281192 | NP_057510    | S | L | SL | benign            |
| rs2281209 | NP_031393    | G | S | GS | benign            |
| rs2281209 | NP_057951    | G | S | GS | benign            |
| rs2281278 | NP_006640    | V | A | VA | benign            |
| rs2281534 | NP_542189    | L | Q | LQ | benign            |
| rs2281571 | XP_050478    | D | G | DG | possibly damaging |
| rs2281705 | NP_005597    | S | R | SR | benign            |
| rs2281726 | NP_060598    | S | G | SG | benign            |
| rs2281796 | NP_660357    | Y | C | YC | probably damaging |
| rs2281820 | NP_002409    | V | A | VA | benign            |
| rs2281878 | NP_079162    | A | S | AS | benign            |
| rs2281891 | NP_000763    | T | M | TM | possibly damaging |
| rs2281929 | NP_079500    | T | A | TA | benign            |
| rs2281939 | NP_056200    | T | A | TA | benign            |

|           |           |   |   |    |                   |
|-----------|-----------|---|---|----|-------------------|
| rs2281959 | XP_043739 | T | N | TN | benign            |
| rs2281982 | NP_002044 | K | R | KR | benign            |
| rs2282143 | NP_694857 | P | L | PL | benign            |
| rs2282143 | NP_003048 | P | L | PL | probably damaging |
| rs2282164 | NP_002403 | W | C | WC | probably damaging |
| rs2282192 | NP_057565 | V | M | VM | benign            |
| rs2282236 | NP_079493 | I | T | IT | benign            |
| rs2282236 | NP_570970 | T | I | TI | benign            |
| rs2282238 | NP_004410 | E | D | ED | benign            |
| rs2282258 | XP_380172 | G | V | GV | probably damaging |
| rs2282284 | NP_443171 | N | S | NS | benign            |
| rs2282406 | NP_954589 | I | M | IM | benign            |
| rs2282406 | NP_689917 | I | M | IM | benign            |
| rs2282440 | XP_375712 | T | I | TI | benign            |
| rs2282488 | NP_878907 | D | N | DN | benign            |
| rs2282498 | XP_374893 | V | A | VA | benign            |
| rs2282532 | NP_004283 | P | S | PS | possibly damaging |
| rs2282537 | NP_055167 | R | K | RK | benign            |
| rs2282556 | NP_005903 | G | R | GR | possibly damaging |
| rs2282580 | NP_116184 | R | Q | RQ | benign            |
| rs2282602 | NP_777587 | A | V | AV | benign            |
| rs2282632 | XP_290811 | N | S | NS | benign            |
| rs2282683 | NP_001481 | I | V | IV | benign            |
| rs2283432 | NP_060663 | S | C | SC | benign            |
| rs2285023 | NP_001796 | D | E | DE | benign            |
| rs2285215 | XP_040527 | P | L | PL | probably damaging |
| rs2285302 | NP_006188 | A | D | AD | possibly damaging |
| rs2285347 | XP_290517 | A | V | AV | benign            |
| rs2285348 | NP_078799 | C | W | CW | probably damaging |
| rs2285372 | NP_055918 | P | S | PS | benign            |
| rs2285396 | XP_208270 | H | R | HR | benign            |
| rs2285412 | XP_049237 | A | D | AD | benign            |
| rs2285418 | XP_290831 | L | V | LV | benign            |
| rs2285419 | XP_290831 | D | N | DN | benign            |
| rs2285421 | NP_008931 | M | T | MT | benign            |
| rs2285477 | NP_002461 | T | A | TA | benign            |
| rs2285487 | NP_065118 | T | A | TA | benign            |
| rs2285514 | NP_055179 | D | N | DN | benign            |
| rs2285644 | NP_000333 | P | L | PL | possibly damaging |
| rs2285738 | NP_620166 | H | R | HR | benign            |
| rs2285744 | XP_371877 | D | E | DE | benign            |
| rs2285745 | XP_496306 | L | S | LS | benign            |
| rs2285751 | NP_060346 | V | M | VM | benign            |
| rs2285751 | NP_919442 | V | M | VM | benign            |
| rs2285817 | NP_056330 | R | S | RS | benign            |
| rs2285817 | NP_775320 | R | S | RS | benign            |



|           |           |   |   |    |                   |
|-----------|-----------|---|---|----|-------------------|
| rs2285888 | NP_076433 | R | C | RC | benign            |
| rs2285906 | XP_290850 | A | T | AT | benign            |
| rs2285933 | NP_006178 | S | R | SR | benign            |
| rs2285974 | NP_060355 | P | Q | PQ | benign            |
| rs2285981 | NP_000426 | V | M | VM | benign            |
| rs2285988 | NP_057345 | N | D | ND | benign            |
| rs2285990 | NP_060233 | R | Q | RQ | benign            |
| rs2286009 | NP_055914 | S | I | SI | benign            |
| rs2286025 | NP_076961 | S | F | SF | benign            |
| rs2286118 | NP_071361 | P | T | PT | probably damaging |
| rs2286122 | XP_376720 | A | P | AP | benign            |
| rs2286160 | NP_006400 | V | I | VI | benign            |
| rs2286199 | NP_001052 | A | T | AT | benign            |
| rs2286199 | NP_112246 | A | T | AT | benign            |
| rs2286323 | NP_872307 | M | T | MT | benign            |
| rs2286394 | NP_060176 | S | F | SF | possibly damaging |
| rs2286471 | XP_496111 | P | S | PS | possibly damaging |
| rs2286472 | XP_496111 | D | A | DA | possibly damaging |
| rs2286520 | NP_003584 | R | W | RW | possibly damaging |
| rs2286612 | NP_115720 | G | C | GC | possibly damaging |
| rs2286624 | NP_065174 | R | L | RL | possibly damaging |
| rs2286653 | NP_786924 | A | T | AT | benign            |
| rs2286662 | NP_005534 | T | A | TA | benign            |
| rs2286672 | NP_002654 | C | R | CR | possibly damaging |
| rs2286677 | NP_055219 | V | I | VI | benign            |
| rs2286734 | NP_006166 | A | S | AS | benign            |
| rs2286734 | NP_932326 | A | S | AS | benign            |
| rs2286735 | NP_006166 | A | V | AV | benign            |
| rs2286735 | NP_932326 | A | V | AV | benign            |
| rs2286771 | XP_039169 | R | W | RW | possibly damaging |
| rs2286786 | NP_055951 | G | R | GR | benign            |
| rs2286838 | NP_067083 | S | R | SR | benign            |
| rs2286866 | NP_056002 | W | C | WC | probably damaging |
| rs2286913 | NP_113652 | P | L | PL | possibly damaging |
| rs2286963 | NP_001599 | K | Q | KQ | benign            |
| rs2286965 | NP_063938 | E | K | EK | benign            |
| rs2287015 | NP_060261 | A | V | AV | benign            |
| rs2287058 | NP_079170 | R | T | RT | possibly damaging |
| rs2287059 | NP_079170 | D | N | DN | benign            |
| rs2287174 | NP_149112 | L | P | LP | benign            |
| rs2287306 | XP_371182 | Q | R | QR | benign            |
| rs2287345 | NP_056516 | V | L | VL | benign            |
| rs2287351 | NP_942131 | R | W | RW | possibly damaging |
| rs2287351 | NP_942134 | R | W | RW | possibly damaging |
| rs2287351 | NP_942136 | R | W | RW | possibly damaging |
| rs2287359 | NP_004924 | A | S | AS | benign            |

|           |           |   |   |    |                   |
|-----------|-----------|---|---|----|-------------------|
| rs2287384 | XP_041116 | M | V | MV | benign            |
| rs2287450 | XP_495917 | V | E | VE | benign            |
| rs2287499 | NP_060551 | R | G | RG | benign            |
| rs2287546 | NP_055521 | E | D | ED | benign            |
| rs2287558 | NP_066964 | I | V | IV | benign            |
| rs2287562 | XP_046685 | S | L | SL | possibly damaging |
| rs2287579 | NP_002653 | V | M | VM | benign            |
| rs2287617 | NP_003733 | R | K | RK | benign            |
| rs2287622 | NP_003733 | V | A | VA | benign            |
| rs2287669 | NP_115515 | G | S | GS | benign            |
| rs2287679 | NP_060495 | L | P | LP | benign            |
| rs2287714 | NP_064594 | G | S | GS | benign            |
| rs2287749 | NP_150377 | G | D | GD | possibly damaging |
| rs2287780 | NP_076915 | R | C | RC | possibly damaging |
| rs2287780 | NP_002445 | R | C | RC | possibly damaging |
| rs2287790 | XP_044632 | V | I | VI | benign            |
| rs2287798 | NP_001160 | A | P | AP | benign            |
| rs2287803 | NP_056534 | G | R | GR | possibly damaging |
| rs2287870 | NP_002194 | N | S | NS | benign            |
| rs2287918 | NP_056133 | Q | R | QR | benign            |
| rs2287920 | NP_056133 | R | Q | RQ | benign            |
| rs2287922 | NP_060275 | R | C | RC | possibly damaging |
| rs2287926 | NP_004376 | G | D | GD | possibly damaging |
| rs2287932 | NP_006624 | R | I | RI | probably damaging |
| rs2287939 | NP_055139 | L | S | LS | benign            |
| rs2287941 | NP_000765 | V | L | VL | possibly damaging |
| rs2287942 | NP_000765 | V | G | VG | probably damaging |
| rs2287978 | NP_060460 | Y | F | YF | benign            |
| rs2287987 | NP_057526 | V | M | VM | probably damaging |
| rs2288020 | NP_848547 | S | L | SL | benign            |
| rs2288022 | NP_848547 | P | L | PL | probably damaging |
| rs2288023 | NP_848547 | T | S | TS | benign            |
| rs2288101 | NP_078848 | Q | K | QK | benign            |
| rs2288156 | NP_653282 | A | T | AT | benign            |
| rs2288200 | NP_004534 | D | V | DV | possibly damaging |
| rs2288210 | NP_004534 | T | R | TR | possibly damaging |
| rs2288255 | NP_060063 | G | S | GS | benign            |
| rs2288284 | NP_653267 | R | Q | RQ | benign            |
| rs2288411 | NP_036467 | P | L | PL | benign            |
| rs2288413 | NP_078828 | G | S | GS | benign            |
| rs2288466 | NP_057363 | A | V | AV | benign            |
| rs2288467 | NP_057363 | Y | C | YC | benign            |
| rs2288481 | NP_055234 | E | K | EK | benign            |
| rs2288538 | NP_079038 | W | C | WC | benign            |
| rs2288648 | NP_006703 | A | V | AV | benign            |
| rs2288648 | NP_148936 | A | V | AV | benign            |

|           |           |   |   |    |                   |
|-----------|-----------|---|---|----|-------------------|
| rs2288674 | NP_036535 | A | V | AV | possibly damaging |
| rs2288675 | NP_036535 | R | K | RK | possibly damaging |
| rs2288709 | NP_056337 | F | S | FS | benign            |
| rs2288709 | NP_057092 | F | S | FS | possibly damaging |
| rs2288792 | NP_003053 | R | Q | RQ | possibly damaging |
| rs2288846 | NP_602309 | A | T | AT | benign            |
| rs2288846 | NP_000626 | A | T | AT | benign            |
| rs2288851 | NP_060130 | N | S | NS | benign            |
| rs2288892 | NP_659196 | A | T | AT | benign            |
| rs2288904 | NP_065161 | R | Q | RQ | benign            |
| rs2288920 | NP_000942 | G | C | GC | possibly damaging |
| rs2288949 | NP_064555 | R | K | RK | benign            |
| rs2288957 | NP_775751 | R | W | RW | possibly damaging |
| rs2288958 | NP_775751 | T | N | TN | possibly damaging |
| rs2289015 | NP_788954 | G | D | GD | benign            |
| rs2289025 | NP_689739 | R | K | RK | benign            |
| rs2289025 | NP_995585 | R | K | RK | benign            |
| rs2289043 | NP_003719 | T | M | TM | probably damaging |
| rs2289080 | NP_005190 | A | T | AT | benign            |
| rs2289084 | XP_371479 | Q | R | QR | benign            |
| rs2289096 | NP_872302 | L | S | LS | possibly damaging |
| rs2289170 | NP_055855 | R | Q | RQ | benign            |
| rs2289178 | XP_034904 | S | I | SI | possibly damaging |
| rs2289181 | XP_034904 | S | L | SL | benign            |
| rs2289189 | NP_036546 | S | T | ST | benign            |
| rs2289229 | XP_291015 | I | T | IT | possibly damaging |
| rs2289235 | NP_112188 | G | S | GS | benign            |
| rs2289247 | NP_055181 | V | M | VM | possibly damaging |
| rs2289247 | NP_996562 | V | M | VM | possibly damaging |
| rs2289310 | NP_004738 | P | Q | PQ | probably damaging |
| rs2289361 | XP_209227 | C | R | CR | probably damaging |
| rs2289363 | NP_004332 | E | K | EK | benign            |
| rs2289366 | NP_113631 | S | N | SN | benign            |
| rs2289433 | NP_006578 | C | Y | CY | probably damaging |
| rs2289491 | NP_775924 | I | V | IV | benign            |
| rs2289519 | NP_002630 | P | S | PS | possibly damaging |
| rs2289520 | NP_002630 | L | V | LV | benign            |
| rs2289530 | XP_371082 | P | A | PA | benign            |
| rs2289532 | XP_371082 | E | K | EK | benign            |
| rs2289537 | NP_000143 | T | A | TA | benign            |
| rs2289541 | NP_077015 | R | H | RH | possibly damaging |
| rs2289593 | NP_001377 | A | T | AT | benign            |
| rs2289622 | NP_060506 | T | I | TI | benign            |
| rs2289629 | NP_203747 | S | L | SL | benign            |
| rs2289642 | XP_375397 | L | P | LP | probably damaging |
| rs2289643 | XP_375397 | D | N | DN | benign            |

|           |           |   |   |    |                   |
|-----------|-----------|---|---|----|-------------------|
| rs2289651 | XP_376895 | Q | R | QR | benign            |
| rs2289664 | NP_001783 | N | S | NS | possibly damaging |
| rs2289702 | NP_004381 | G | R | GR | possibly damaging |
| rs2289719 | XP_032997 | R | Q | RQ | benign            |
| rs2289741 | NP_056355 | R | Q | RQ | benign            |
| rs2289838 | NP_003938 | E | D | ED | benign            |
| rs2289867 | NP_056981 | P | Q | PQ | benign            |
| rs2289884 | NP_065777 | S | G | SG | benign            |
| rs2289886 | NP_006200 | N | S | NS | benign            |
| rs2289909 | NP_001667 | P | L | PL | possibly damaging |
| rs2289912 | NP_056390 | P | T | PT | benign            |
| rs2289953 | NP_008994 | A | T | AT | benign            |
| rs2290057 | NP_055244 | S | N | SN | benign            |
| rs2290085 | NP_006028 | V | M | VM | benign            |
| rs2290130 | NP_660279 | V | I | VI | benign            |
| rs2290145 | NP_078872 | S | N | SN | benign            |
| rs2290178 | NP_740746 | A | T | AT | benign            |
| rs2290182 | NP_653274 | I | T | IT | possibly damaging |
| rs2290207 | NP_116254 | N | S | NS | benign            |
| rs2290213 | XP_376589 | C | S | CS | benign            |
| rs2290228 | NP_001210 | R | Q | RQ | possibly damaging |
| rs2290237 | NP_113679 | M | L | ML | benign            |
| rs2290242 | NP_006304 | N | H | NH | benign            |
| rs2290272 | NP_004204 | V | I | VI | benign            |
| rs2290302 | NP_056459 | N | H | NH | benign            |
| rs2290304 | NP_056459 | R | Q | RQ | possibly damaging |
| rs2290305 | NP_056459 | M | R | MR | benign            |
| rs2290344 | NP_004846 | M | T | MT | benign            |
| rs2290380 | NP_620410 | V | I | VI | benign            |
| rs2290427 | NP_000618 | P | Q | PQ | probably damaging |
| rs2290427 | NP_996826 | P | Q | PQ | probably damaging |
| rs2290472 | NP_002371 | T | M | TM | benign            |
| rs2290472 | NP_085072 | T | M | TM | benign            |
| rs2290477 | XP_291062 | A | S | AS | benign            |
| rs2290480 | NP_002653 | A | S | AS | benign            |
| rs2290522 | XP_044622 | L | F | LF | benign            |
| rs2290527 | XP_037557 | N | D | ND | benign            |
| rs2290532 | NP_060254 | N | D | ND | benign            |
| rs2290552 | NP_005081 | M | I | MI | benign            |
| rs2290553 | NP_057726 | R | Q | RQ | benign            |
| rs2290558 | NP_057726 | R | T | RT | possibly damaging |
| rs2290559 | NP_057726 | R | H | RH | benign            |
| rs2290610 | NP_783852 | I | V | IV | benign            |
| rs2290610 | NP_783855 | I | V | IV | benign            |
| rs2290610 | NP_783854 | I | V | IV | benign            |
| rs2290610 | NP_783853 | I | V | IV | benign            |

|           |           |   |   |    |                   |
|-----------|-----------|---|---|----|-------------------|
| rs2290612 | NP_005840 | F | S | FS | possibly damaging |
| rs2290635 | NP_001965 | C | S | CS | probably damaging |
| rs2290663 | NP_060191 | T | S | TS | benign            |
| rs2290723 | NP_055318 | M | T | MT | benign            |
| rs2290734 | NP_003957 | S | L | SL | benign            |
| rs2290766 | NP_076977 | G | R | GR | possibly damaging |
| rs2290772 | NP_758962 | A | S | AS | benign            |
| rs2290772 | NP_690863 | A | S | AS | benign            |
| rs2290787 | NP_057280 | T | A | TA | benign            |
| rs2290788 | NP_057280 | I | T | IT | possibly damaging |
| rs2290789 | NP_057280 | H | R | HR | possibly damaging |
| rs2290808 | XP_497450 | S | Y | SY | probably damaging |
| rs2290834 | NP_000560 | I | V | IV | benign            |
| rs2290846 | NP_006717 | S | L | SL | benign            |
| rs2290861 | NP_060816 | L | S | LS | benign            |
| rs2290862 | NP_060816 | A | T | AT | benign            |
| rs2290863 | NP_115509 | G | E | GE | possibly damaging |
| rs2290959 | NP_542389 | V | M | VM | benign            |
| rs2290971 | NP_004902 | T | M | TM | benign            |
| rs2291087 | NP_002204 | N | S | NS | benign            |
| rs2291089 | NP_002204 | R | Q | RQ | possibly damaging |
| rs2291090 | NP_002204 | L | V | LV | benign            |
| rs2291110 | NP_258260 | S | Y | SY | benign            |
| rs2291116 | NP_002804 | T | I | TI | possibly damaging |
| rs2291157 | NP_714928 | Q | P | QP | possibly damaging |
| rs2291182 | NP_149113 | G | W | GW | probably damaging |
| rs2291189 | XP_371039 | A | V | AV | benign            |
| rs2291256 | NP_005886 | G | E | GE | probably damaging |
| rs2291260 | NP_005886 | K | R | KR | benign            |
| rs2291284 | NP_056277 | V | A | VA | benign            |
| rs2291288 | NP_631920 | V | L | VL | benign            |
| rs2291288 | NP_056057 | V | L | VL | benign            |
| rs2291310 | NP_596870 | S | N | SN | benign            |
| rs2291311 | NP_596870 | V | M | VM | benign            |
| rs2291334 | NP_570139 | I | V | IV | benign            |
| rs2291343 | NP_387450 | N | S | NS | benign            |
| rs2291343 | NP_004352 | N | S | NS | benign            |
| rs2291375 | NP_001618 | V | M | VM | benign            |
| rs2291381 | NP_009139 | M | T | MT | probably damaging |
| rs2291388 | XP_087804 | V | I | VI | benign            |
| rs2291397 | NP_060331 | P | L | PL | probably damaging |
| rs2291465 | NP_056227 | E | K | EK | benign            |
| rs2291483 | NP_861453 | S | F | SF | possibly damaging |
| rs2291498 | NP_056039 | I | V | IV | benign            |
| rs2291516 | XP_290867 | R | C | RC | benign            |
| rs2291569 | NP_001449 | R | Q | RQ | possibly damaging |

|           |           |   |   |    |                   |
|-----------|-----------|---|---|----|-------------------|
| rs2291572 | NP_001449 | K | Q | KQ | benign            |
| rs2291598 | NP_056965 | V | M | VM | benign            |
| rs2291598 | NP_037385 | V | M | VM | benign            |
| rs2291604 | NP_115987 | R | T | RT | benign            |
| rs2291667 | NP_003798 | S | L | SL | benign            |
| rs2291667 | NP_742011 | S | L | SL | benign            |
| rs2291703 | NP_597677 | N | S | NS | benign            |
| rs2291725 | NP_004114 | S | G | SG | benign            |
| rs2291739 | NP_003911 | P | L | PL | probably damaging |
| rs2291806 | NP_004422 | E | K | EK | possibly damaging |
| rs2291822 | NP_036596 | T | A | TA | benign            |
| rs2291864 | NP_002213 | R | Q | RQ | benign            |
| rs2291938 | NP_612423 | Y | C | YC | probably damaging |
| rs2292030 | NP_597713 | P | L | PL | probably damaging |
| rs2292065 | NP_116329 | T | A | TA | benign            |
| rs2292071 | NP_078856 | K | R | KR | benign            |
| rs2292149 | NP_005808 | A | E | AE | benign            |
| rs2292171 | NP_110417 | M | V | MV | benign            |
| rs2292189 | NP_078856 | D | E | DE | benign            |
| rs2292245 | NP_002832 | G | S | GS | benign            |
| rs2292290 | NP_663625 | I | T | IT | benign            |
| rs2292296 | NP_005397 | L | F | LF | benign            |
| rs2292301 | NP_612432 | E | K | EK | benign            |
| rs2292301 | NP_816929 | E | K | EK | benign            |
| rs2292305 | NP_003237 | T | A | TA | benign            |
| rs2292323 | NP_061938 | G | S | GS | benign            |
| rs2292324 | NP_061938 | T | S | TS | benign            |
| rs2292329 | NP_061938 | Q | H | QH | possibly damaging |
| rs2292341 | NP_004850 | P | S | PS | probably damaging |
| rs2292359 | XP_051017 | E | K | EK | benign            |
| rs2292466 | NP_787954 | R | H | RH | benign            |
| rs2292506 | NP_258259 | R | Q | RQ | benign            |
| rs2292553 | NP_071435 | L | P | LP | probably damaging |
| rs2292596 | NP_065782 | P | A | PA | benign            |
| rs2292661 | NP_006801 | T | M | TM | benign            |
| rs2292664 | XP_044334 | P | R | PR | probably damaging |
| rs2292754 | NP_037422 | Y | N | YN | probably damaging |
| rs2292754 | NP_057640 | Y | N | YN | probably damaging |
| rs2292822 | NP_065176 | H | D | HD | probably damaging |
| rs2292829 | NP_004912 | I | T | IT | possibly damaging |
| rs2292880 | NP_077006 | R | W | RW | possibly damaging |
| rs2292884 | NP_077006 | H | R | HR | benign            |
| rs2292923 | NP_004660 | P | H | PH | possibly damaging |
| rs2292927 | NP_690848 | S | G | SG | benign            |
| rs2292954 | NP_003110 | T | A | TA | benign            |
| rs2292969 | NP_005984 | L | P | LP | possibly damaging |

|           |           |   |   |    |                   |
|-----------|-----------|---|---|----|-------------------|
| rs2292971 | NP_005984 | M | T | MT | benign            |
| rs2293012 | NP_060386 | M | L | ML | benign            |
| rs2293013 | NP_060386 | G | E | GE | possibly damaging |
| rs2293025 | NP_003203 | Y | D | YD | probably damaging |
| rs2293066 | NP_061720 | T | I | TI | possibly damaging |
| rs2293097 | XP_171855 | V | M | VM | benign            |
| rs2293172 | NP_060796 | E | D | ED | benign            |
| rs2293177 | XP_371960 | E | K | EK | benign            |
| rs2293203 | NP_055893 | Q | L | QL | benign            |
| rs2293232 | NP_004523 | A | T | AT | benign            |
| rs2293232 | NP_612154 | A | T | AT | benign            |
| rs2293239 | NP_060715 | N | S | NS | possibly damaging |
| rs2293275 | NP_000224 | S | N | SN | benign            |
| rs2293277 | NP_060601 | L | H | LH | benign            |
| rs2293283 | NP_783161 | I | T | IT | possibly damaging |
| rs2293362 | NP_073585 | Q | H | QH | possibly damaging |
| rs2293404 | NP_689771 | A | V | AV | benign            |
| rs2293407 | NP_689771 | T | A | TA | benign            |
| rs2293450 | NP_001677 | S | L | SL | possibly damaging |
| rs2293477 | NP_060745 | R | H | RH | benign            |
| rs2293483 | NP_036579 | E | K | EK | benign            |
| rs2293507 | NP_056385 | A | S | AS | benign            |
| rs2293583 | NP_689919 | I | V | IV | benign            |
| rs2293587 | NP_006621 | V | I | VI | benign            |
| rs2293669 | NP_065830 | T | A | TA | benign            |
| rs2293680 | XP_371575 | C | W | CW | benign            |
| rs2293796 | XP_370765 | R | Q | RQ | benign            |
| rs2293869 | NP_006260 | N | Y | NY | probably damaging |
| rs2293918 | NP_057317 | G | D | GD | benign            |
| rs2293925 | NP_443195 | R | W | RW | possibly damaging |
| rs2293948 | XP_047025 | N | S | NS | benign            |
| rs2293979 | NP_036604 | T | I | TI | possibly damaging |
| rs2294008 | NP_005663 | M | T | MT | benign            |
| rs2294013 | NP_004297 | R | H | RH | possibly damaging |
| rs2294015 | NP_004297 | V | I | VI | benign            |
| rs2294039 | NP_055444 | V | I | VI | benign            |
| rs2294048 | NP_932159 | S | Y | SY | possibly damaging |
| rs2294048 | NP_789847 | S | Y | SY | possibly damaging |
| rs2294048 | NP_067643 | S | Y | SY | possibly damaging |
| rs2294049 | NP_932159 | S | T | ST | benign            |
| rs2294049 | NP_789847 | S | T | ST | benign            |
| rs2294049 | NP_067643 | S | T | ST | benign            |
| rs2294066 | NP_003961 | T | M | TM | possibly damaging |
| rs2294168 | NP_478070 | S | I | SI | possibly damaging |
| rs2294228 | NP_065184 | N | K | NK | benign            |
| rs2294228 | NP_996809 | N | K | NK | benign            |

|           |           |   |   |    |                   |
|-----------|-----------|---|---|----|-------------------|
| rs2294315 | NP_739577 | F | S | FS | probably damaging |
| rs2294315 | NP_072090 | F | S | FS | probably damaging |
| rs2294369 | NP_066919 | G | R | GR | possibly damaging |
| rs2294451 | NP_071375 | P | L | PL | probably damaging |
| rs2294453 | NP_071375 | T | M | TM | benign            |
| rs2294619 | NP_055948 | T | A | TA | benign            |
| rs2294619 | NP_203750 | T | A | TA | benign            |
| rs2294639 | NP_060908 | P | T | PT | possibly damaging |
| rs2294689 | NP_057698 | Q | E | QE | benign            |
| rs2294740 | NP_079339 | V | A | VA | benign            |
| rs2294757 | NP_004657 | I | T | IT | possibly damaging |
| rs2294760 | NP_004656 | V | A | VA | possibly damaging |
| rs2294763 | NP_443136 | N | S | NS | benign            |
| rs2294849 | NP_060664 | A | D | AD | benign            |
| rs2294851 | NP_060664 | S | N | SN | benign            |
| rs2295005 | NP_612638 | A | G | AG | benign            |
| rs2295006 | NP_002053 | R | H | RH | benign            |
| rs2295021 | NP_065387 | V | M | VM | benign            |
| rs2295182 | NP_808779 | R | T | RT | benign            |
| rs2295190 | NP_056108 | L | M | LM | benign            |
| rs2295190 | NP_598411 | L | M | LM | benign            |
| rs2295190 | NP_149062 | L | M | LM | benign            |
| rs2295190 | NP_892006 | L | M | LM | benign            |
| rs2295191 | NP_056108 | G | S | GS | benign            |
| rs2295191 | NP_598411 | G | S | GS | benign            |
| rs2295191 | NP_149062 | G | S | GS | benign            |
| rs2295191 | NP_892006 | G | S | GS | benign            |
| rs2295192 | NP_056108 | R | Q | RQ | benign            |
| rs2295192 | NP_598411 | R | Q | RQ | benign            |
| rs2295192 | NP_149062 | R | Q | RQ | benign            |
| rs2295192 | NP_892006 | R | Q | RQ | benign            |
| rs2295201 | XP_376540 | I | V | IV | benign            |
| rs2295213 | NP_057234 | P | S | PS | probably damaging |
| rs2295275 | NP_277037 | C | S | CS | probably damaging |
| rs2295275 | NP_060885 | C | S | CS | probably damaging |
| rs2295275 | NP_277036 | C | S | CS | probably damaging |
| rs2295283 | NP_068752 | E | K | EK | benign            |
| rs2295289 | NP_068752 | R | W | RW | possibly damaging |
| rs2295304 | NP_612461 | R | G | RG | probably damaging |
| rs2295322 | NP_054888 | G | R | GR | benign            |
| rs2295336 | NP_115928 | S | P | SP | possibly damaging |
| rs2295418 | NP_003231 | P | L | PL | probably damaging |
| rs2295466 | NP_003570 | K | E | KE | benign            |
| rs2295474 | NP_000370 | C | Y | CY | probably damaging |
| rs2295476 | NP_057164 | T | M | TM | possibly damaging |
| rs2295490 | NP_066981 | Q | R | QR | benign            |



|           |           |   |   |    |                   |
|-----------|-----------|---|---|----|-------------------|
| rs2295497 | NP_054908 | R | C | RC | possibly damaging |
| rs2295497 | NP_054909 | R | C | RC | possibly damaging |
| rs2295497 | NP_789771 | R | C | RC | possibly damaging |
| rs2295497 | NP_001110 | R | C | RC | possibly damaging |
| rs2295524 | NP_079228 | D | N | DN | benign            |
| rs2295564 | NP_542177 | H | P | HP | probably damaging |
| rs2295612 | NP_003028 | F | L | FL | benign            |
| rs2295615 | NP_001769 | E | Q | EQ | benign            |
| rs2295617 | NP_067004 | T | M | TM | benign            |
| rs2295620 | NP_443100 | T | M | TM | benign            |
| rs2295651 | NP_065713 | P | S | PS | possibly damaging |
| rs2295666 | NP_149417 | A | V | AV | benign            |
| rs2295766 | NP_004559 | G | S | GS | benign            |
| rs2295769 | NP_004559 | M | V | MV | benign            |
| rs2295771 | NP_056305 | R | Q | RQ | possibly damaging |
| rs2295772 | NP_056305 | P | S | PS | benign            |
| rs2295774 | NP_937781 | S | A | SA | benign            |
| rs2295774 | NP_056305 | S | A | SA | benign            |
| rs2295778 | NP_060372 | P | A | PA | possibly damaging |
| rs2295790 | NP_954653 | V | M | VM | benign            |
| rs2295790 | NP_006434 | V | M | VM | benign            |
| rs2295795 | NP_006280 | S | L | SL | benign            |
| rs2295837 | NP_055660 | M | L | ML | benign            |
| rs2295847 | NP_057434 | Q | E | QE | benign            |
| rs2295847 | NP_065972 | Q | E | QE | benign            |
| rs2295847 | NP_891989 | Q | E | QE | benign            |
| rs2295847 | NP_891990 | Q | E | QE | benign            |
| rs2295847 | NP_891991 | Q | E | QE | benign            |
| rs2295852 | NP_619732 | I | V | IV | benign            |
| rs2295852 | NP_443193 | I | V | IV | benign            |
| rs2295862 | NP_036515 | N | S | NS | benign            |
| rs2295873 | NP_996742 | V | A | VA | benign            |
| rs2295873 | NP_996743 | V | A | VA | benign            |
| rs2295873 | NP_996744 | V | A | VA | benign            |
| rs2295873 | NP_008928 | V | A | VA | benign            |
| rs2295874 | NP_996742 | A | V | AV | benign            |
| rs2295874 | NP_996743 | A | V | AV | benign            |
| rs2295874 | NP_996744 | A | V | AV | benign            |
| rs2295874 | NP_008928 | A | V | AV | benign            |
| rs2295875 | NP_996742 | P | L | PL | benign            |
| rs2295875 | NP_996743 | P | L | PL | benign            |
| rs2295875 | NP_008928 | P | L | PL | benign            |
| rs2295875 | NP_996744 | P | L | PL | possibly damaging |
| rs2295876 | NP_996742 | L | H | LH | possibly damaging |
| rs2295876 | NP_996743 | L | H | LH | possibly damaging |
| rs2295876 | NP_996744 | L | H | LH | possibly damaging |

|           |           |   |   |    |                   |
|-----------|-----------|---|---|----|-------------------|
| rs2295876 | NP_008928 | L | H | LH | possibly damaging |
| rs2295878 | NP_996742 | V | I | VI | benign            |
| rs2295878 | NP_996743 | V | I | VI | benign            |
| rs2295878 | NP_996744 | V | I | VI | benign            |
| rs2295878 | NP_008928 | V | I | VI | benign            |
| rs2295879 | NP_996742 | A | T | AT | benign            |
| rs2295879 | NP_996743 | A | T | AT | benign            |
| rs2295879 | NP_996744 | A | T | AT | benign            |
| rs2295879 | NP_008928 | A | T | AT | benign            |
| rs2295907 | NP_005785 | F | L | FL | benign            |
| rs2295907 | NP_878912 | F | L | FL | benign            |
| rs2295908 | NP_878912 | T | M | TM | benign            |
| rs2295908 | NP_005785 | T | M | TM | possibly damaging |
| rs2295934 | XP_166086 | S | R | SR | benign            |
| rs2295947 | NP_689945 | V | M | VM | benign            |
| rs2295950 | NP_060143 | L | F | LF | benign            |
| rs2295973 | XP_375105 | A | V | AV | benign            |
| rs2295994 | NP_075383 | D | E | DE | benign            |
| rs2296060 | XP_374297 | L | F | LF | benign            |
| rs2296067 | NP_055876 | D | N | DN | benign            |
| rs2296079 | NP_150090 | V | M | VM | benign            |
| rs2296079 | NP_150089 | V | M | VM | benign            |
| rs2296129 | XP_371402 | E | A | EA | benign            |
| rs2296136 | XP_166138 | A | G | AG | benign            |
| rs2296151 | NP_001663 | V | A | VA | benign            |
| rs2296158 | XP_114735 | R | G | RG | benign            |
| rs2296160 | NP_000642 | A | T | AT | benign            |
| rs2296160 | NP_000564 | A | T | AT | benign            |
| rs2296172 | NP_149033 | M | V | MV | benign            |
| rs2296172 | NP_036222 | M | V | MV | benign            |
| rs2296174 | NP_149033 | T | I | TI | benign            |
| rs2296174 | NP_036222 | T | I | TI | possibly damaging |
| rs2296225 | NP_065867 | I | V | IV | benign            |
| rs2296303 | NP_061486 | S | T | ST | benign            |
| rs2296303 | NP_005553 | S | T | ST | benign            |
| rs2296306 | NP_061486 | D | E | DE | benign            |
| rs2296306 | NP_005553 | D | E | DE | benign            |
| rs2296308 | NP_056300 | K | N | KN | benign            |
| rs2296333 | NP_002215 | G | V | GV | benign            |
| rs2296356 | XP_373109 | G | R | GR | possibly damaging |
| rs2296377 | NP_071766 | L | F | LF | benign            |
| rs2296403 | NP_009117 | Q | H | QH | benign            |
| rs2296414 | NP_002429 | T | I | TI | benign            |
| rs2296434 | NP_000186 | P | R | PR | possibly damaging |
| rs2296436 | NP_000186 | Q | R | QR | benign            |
| rs2296441 | NP_116098 | A | T | AT | benign            |

|           |           |   |   |    |                   |
|-----------|-----------|---|---|----|-------------------|
| rs2296545 | NP_060833 | E | D | ED | benign            |
| rs2296556 | NP_055722 | A | T | AT | benign            |
| rs2296594 | NP_003165 | T | M | TM | benign            |
| rs2296594 | NP_068506 | T | M | TM | benign            |
| rs2296610 | NP_006384 | A | D | AD | benign            |
| rs2296651 | NP_003040 | S | F | SF | possibly damaging |
| rs2296681 | NP_000763 | K | E | KE | benign            |
| rs2296687 | NP_065869 | K | R | KR | benign            |
| rs2296695 | NP_003272 | R | W | RW | probably damaging |
| rs2296723 | NP_060845 | E | D | ED | benign            |
| rs2296815 | XP_030729 | S | C | SC | benign            |
| rs2296815 | XP_497069 | S | C | SC | benign            |
| rs2296871 | NP_055861 | T | P | TP | possibly damaging |
| rs2296881 | NP_060754 | H | L | HL | probably damaging |
| rs2296917 | NP_004109 | P | A | PA | possibly damaging |
| rs2296928 | XP_375085 | E | A | EA | possibly damaging |
| rs2296949 | NP_009102 | R | Q | RQ | benign            |
| rs2296961 | NP_066272 | N | S | NS | benign            |
| rs2296968 | NP_060296 | A | T | AT | benign            |
| rs2297002 | NP_808800 | H | R | HR | benign            |
| rs2297019 | NP_005579 | M | V | MV | benign            |
| rs2297020 | NP_005579 | S | T | ST | benign            |
| rs2297025 | NP_004111 | S | P | SP | benign            |
| rs2297066 | XP_040910 | D | E | DE | benign            |
| rs2297067 | XP_040910 | R | W | RW | possibly damaging |
| rs2297085 | NP_000498 | F | I | FI | probably damaging |
| rs2297089 | NP_037522 | S | N | SN | benign            |
| rs2297232 | NP_003549 | N | S | NS | possibly damaging |
| rs2297241 | NP_078901 | H | Q | HQ | benign            |
| rs2297241 | NP_064504 | H | Q | HQ | possibly damaging |
| rs2297270 | NP_996770 | D | E | DE | benign            |
| rs2297270 | NP_001380 | D | E | DE | benign            |
| rs2297322 | NP_005064 | S | N | SN | benign            |
| rs2297336 | NP_872345 | F | S | FS | probably damaging |
| rs2297345 | NP_817127 | S | N | SN | benign            |
| rs2297373 | NP_694857 | F | L | FL | probably damaging |
| rs2297373 | NP_003048 | F | L | FL | probably damaging |
| rs2297382 | NP_056355 | K | M | KM | benign            |
| rs2297411 | NP_064632 | H | Q | HQ | benign            |
| rs2297417 | NP_055641 | T | A | TA | benign            |
| rs2297417 | NP_003598 | T | A | TA | benign            |
| rs2297425 | NP_056417 | T | I | TI | benign            |
| rs2297463 | XP_376554 | R | H | RH | benign            |
| rs2297483 | NP_620132 | M | V | MV | benign            |
| rs2297507 | NP_004167 | R | W | RW | probably damaging |
| rs2297518 | NP_695024 | S | L | SL | possibly damaging |

|           |           |   |   |    |                   |
|-----------|-----------|---|---|----|-------------------|
| rs2297518 | NP_000616 | S | L | SL | possibly damaging |
| rs2297534 | NP_958854 | T | S | TS | benign            |
| rs2297538 | NP_958854 | V | I | VI | benign            |
| rs2297567 | NP_009033 | P | T | PT | benign            |
| rs2297587 | NP_005551 | R | H | RH | benign            |
| rs2297595 | NP_000101 | M | V | MV | probably damaging |
| rs2297603 | NP_001846 | G | V | GV | probably damaging |
| rs2297613 | NP_009041 | D | E | DE | benign            |
| rs2297653 | NP_689511 | M | T | MT | probably damaging |
| rs2297653 | NP_751896 | M | T | MT | probably damaging |
| rs2297653 | NP_002473 | M | T | MT | probably damaging |
| rs2297654 | NP_689713 | I | V | IV | benign            |
| rs2297655 | NP_689713 | R | P | RP | possibly damaging |
| rs2297669 | NP_000341 | R | S | RS | probably damaging |
| rs2297717 | NP_073571 | G | A | GA | benign            |
| rs2297773 | XP_044580 | I | V | IV | benign            |
| rs2297775 | NP_115668 | M | V | MV | benign            |
| rs2297792 | NP_064516 | I | M | IM | benign            |
| rs2297809 | NP_000770 | R | C | RC | probably damaging |
| rs2297810 | NP_000770 | M | I | MI | possibly damaging |
| rs2297852 | NP_001422 | Q | H | QH | benign            |
| rs2297871 | NP_036442 | A | V | AV | benign            |
| rs2297873 | XP_293398 | I | V | IV | benign            |
| rs2297881 | NP_055889 | Y | C | YC | probably damaging |
| rs2297950 | NP_003456 | G | S | GS | possibly damaging |
| rs2297970 | XP_166300 | C | Y | CY | benign            |
| rs2297980 | NP_055279 | R | Q | RQ | benign            |
| rs2298014 | XP_114152 | G | S | GS | benign            |
| rs2298033 | XP_167711 | S | F | SF | possibly damaging |
| rs2298039 | NP_116188 | P | S | PS | probably damaging |
| rs2298043 | NP_006327 | P | A | PA | probably damaging |
| rs2298075 | NP_056305 | A | S | AS | benign            |
| rs2298083 | NP_775179 | V | I | VI | benign            |
| rs2298083 | NP_963863 | V | I | VI | benign            |
| rs2298083 | NP_963862 | V | I | VI | benign            |
| rs2298083 | NP_055652 | V | I | VI | benign            |
| rs2298110 | XP_375697 | N | S | NS | benign            |
| rs2298121 | NP_006650 | A | T | AT | benign            |
| rs2298154 | NP_579899 | R | C | RC | benign            |
| rs2298154 | NP_038479 | R | C | RC | benign            |
| rs2298171 | NP_689499 | G | S | GS | possibly damaging |
| rs2298173 | NP_976072 | I | V | IV | benign            |
| rs2298260 | XP_376819 | T | A | TA | benign            |
| rs2298284 | NP_061940 | R | H | RH | benign            |
| rs2298316 | NP_065081 | R | Q | RQ | benign            |
| rs2298398 | NP_060734 | T | M | TM | benign            |

|           |           |   |   |    |                   |
|-----------|-----------|---|---|----|-------------------|
| rs2298428 | XP_097886 | A | T | AT | benign            |
| rs2298447 | NP_079404 | L | F | LF | benign            |
| rs2298484 | NP_055972 | R | H | RH | benign            |
| rs2298546 | NP_056023 | S | N | SN | benign            |
| rs2298547 | NP_056023 | S | R | SR | possibly damaging |
| rs2298548 | NP_056023 | P | A | PA | possibly damaging |
| rs2298566 | XP_374949 | L | R | LR | possibly damaging |
| rs2298624 | XP_371116 | R | H | RH | benign            |
| rs2298668 | NP_005031 | E | D | ED | benign            |
| rs2298697 | NP_003897 | R | C | RC | benign            |
| rs2298702 | NP_060782 | E | Q | EQ | benign            |
| rs2298707 | XP_374922 | A | G | AG | benign            |
| rs2298711 | NP_005561 | M | L | ML | benign            |
| rs2298719 | NP_056949 | M | V | MV | benign            |
| rs2298720 | NP_056949 | E | K | EK | possibly damaging |
| rs2298768 | NP_001216 | D | E | DE | possibly damaging |
| rs2298771 | NP_008851 | T | A | TA | benign            |
| rs2298804 | NP_001992 | K | R | KR | benign            |
| rs2298805 | NP_001992 | S | N | SN | benign            |
| rs2298808 | NP_055601 | A | D | AD | benign            |
| rs2298813 | NP_003096 | A | T | AT | benign            |
| rs2298831 | NP_694938 | I | M | IM | benign            |
| rs2298872 | NP_563578 | S | R | SR | benign            |
| rs2298872 | NP_563579 | S | R | SR | benign            |
| rs2298872 | NP_002829 | S | R | SR | benign            |
| rs2301149 | NP_004128 | V | L | VL | benign            |
| rs2301151 | NP_005294 | R | H | RH | benign            |
| rs2301246 | NP_001898 | H | R | HR | benign            |
| rs2301344 | NP_075252 | R | L | RL | probably damaging |
| rs2301344 | NP_998812 | R | L | RL | probably damaging |
| rs2301354 | NP_003762 | T | M | TM | possibly damaging |
| rs2301366 | NP_937782 | S | T | ST | benign            |
| rs2301366 | NP_002998 | S | T | ST | benign            |
| rs2301387 | NP_071335 | N | I | NI | probably damaging |
| rs2301416 | NP_055296 | R | C | RC | benign            |
| rs2301423 | NP_000845 | V | M | VM | benign            |
| rs2301553 | NP_055585 | G | S | GS | benign            |
| rs2301562 | NP_722541 | G | A | GA | benign            |
| rs2301562 | NP_005816 | G | A | GA | benign            |
| rs2301574 | XP_378314 | R | H | RH | benign            |
| rs2301582 | NP_127499 | V | M | VM | benign            |
| rs2301582 | NP_127500 | V | M | VM | benign            |
| rs2301582 | NP_055737 | V | M | VM | benign            |
| rs2301582 | NP_127497 | V | M | VM | benign            |
| rs2301596 | XP_049237 | P | L | PL | possibly damaging |
| rs2301612 | NP_620596 | Q | E | QE | benign            |

|           |           |   |   |    |                   |
|-----------|-----------|---|---|----|-------------------|
| rs2301612 | NP_620595 | Q | E | QE | benign            |
| rs2301612 | NP_620594 | Q | E | QE | benign            |
| rs2301620 | NP_060009 | R | W | RW | probably damaging |
| rs2301626 | NP_002195 | G | S | GS | benign            |
| rs2301626 | NP_005492 | G | S | GS | benign            |
| rs2301635 | NP_000102 | R | Q | RQ | benign            |
| rs2301641 | NP_848654 | K | E | KE | possibly damaging |
| rs2301721 | NP_008827 | A | T | AT | benign            |
| rs2301726 | NP_076997 | R | Q | RQ | benign            |
| rs2301752 | NP_739575 | A | T | AT | benign            |
| rs2301752 | NP_079512 | A | T | AT | benign            |
| rs2301753 | NP_739575 | A | E | AE | benign            |
| rs2301753 | NP_079512 | A | E | AE | benign            |
| rs2301790 | XP_052620 | M | V | MV | benign            |
| rs2301806 | XP_376658 | P | A | PA | possibly damaging |
| rs2301833 | NP_938191 | R | W | RW | possibly damaging |
| rs2301833 | NP_938406 | R | W | RW | possibly damaging |
| rs2301833 | NP_061496 | R | W | RW | possibly damaging |
| rs2301833 | NP_938190 | R | W | RW | probably damaging |
| rs2301833 | NP_938192 | R | W | RW | probably damaging |
| rs2301833 | NP_938193 | R | W | RW | probably damaging |
| rs2301833 | NP_938194 | R | W | RW | probably damaging |
| rs2301833 | NP_938196 | R | W | RW | probably damaging |
| rs2301833 | NP_938197 | R | W | RW | probably damaging |
| rs2301833 | NP_938198 | R | W | RW | probably damaging |
| rs2301833 | NP_938199 | R | W | RW | probably damaging |
| rs2301833 | NP_938200 | R | W | RW | probably damaging |
| rs2301833 | NP_938201 | R | W | RW | probably damaging |
| rs2301833 | NP_938202 | R | W | RW | probably damaging |
| rs2301833 | NP_938407 | R | W | RW | probably damaging |
| rs2301850 | NP_036530 | G | S | GS | benign            |
| rs2301868 | NP_004749 | G | E | GE | possibly damaging |
| rs2301870 | NP_006142 | V | M | VM | benign            |
| rs2301895 | NP_057412 | M | V | MV | benign            |
| rs2301895 | NP_005676 | V | M | VM | benign            |
| rs2301963 | NP_004736 | P | Q | PQ | benign            |
| rs2301983 | NP_689712 | A | V | AV | benign            |
| rs2302006 | NP_002982 | I | L | IL | benign            |
| rs2302007 | NP_002982 | S | G | SG | benign            |
| rs2302014 | XP_376193 | L | V | LV | benign            |
| rs2302054 | XP_297687 | V | I | VI | benign            |
| rs2302061 | NP_115871 | V | L | VL | benign            |
| rs2302075 | NP_714928 | T | K | TK | benign            |
| rs2302110 | XP_375553 | P | T | PT | benign            |
| rs2302131 | NP_057202 | Q | R | QR | benign            |
| rs2302134 | NP_525023 | N | S | NS | benign            |

|           |           |   |   |    |                   |
|-----------|-----------|---|---|----|-------------------|
| rs2302146 | NP_112198 | R | C | RC | possibly damaging |
| rs2302147 | NP_112198 | H | Q | HQ | probably damaging |
| rs2302148 | NP_112198 | R | Q | RQ | benign            |
| rs2302172 | NP_002519 | R | K | RK | benign            |
| rs2302188 | NP_291021 | M | V | MV | benign            |
| rs2302189 | NP_004678 | V | G | VG | possibly damaging |
| rs2302190 | NP_004678 | G | S | GS | benign            |
| rs2302234 | NP_060035 | K | N | KN | possibly damaging |
| rs2302275 | NP_001795 | P | R | PR | benign            |
| rs2302294 | NP_759018 | K | T | KT | possibly damaging |
| rs2302294 | NP_525022 | K | T | KT | possibly damaging |
| rs2302306 | NP_055243 | V | M | VM | benign            |
| rs2302310 | NP_937822 | L | S | LS | possibly damaging |
| rs2302311 | NP_000493 | N | Y | NY | probably damaging |
| rs2302323 | NP_002654 | G | D | GD | possibly damaging |
| rs2302339 | NP_006765 | M | V | MV | probably damaging |
| rs2302340 | NP_006765 | G | E | GE | probably damaging |
| rs2302349 | NP_057090 | I | T | IT | benign            |
| rs2302422 | NP_703144 | N | T | NT | possibly damaging |
| rs2302427 | NP_694543 | D | H | DH | benign            |
| rs2302427 | NP_004447 | D | H | DH | benign            |
| rs2302464 | NP_004325 | R | Q | RQ | benign            |
| rs2302465 | NP_004325 | R | H | RH | possibly damaging |
| rs2302466 | NP_004325 | A | V | AV | benign            |
| rs2302515 | NP_001635 | I | M | IM | benign            |
| rs2302516 | NP_065685 | V | L | VL | benign            |
| rs2302524 | NP_002650 | K | R | KR | benign            |
| rs2302566 | NP_722547 | K | N | KN | benign            |
| rs2302566 | NP_058651 | N | K | NK | benign            |
| rs2302588 | NP_056419 | W | C | WC | probably damaging |
| rs2302612 | NP_003845 | L | P | LP | possibly damaging |
| rs2302657 | XP_042685 | S | P | SP | possibly damaging |
| rs2302669 | XP_375485 | C | R | CR | probably damaging |
| rs2302677 | XP_051197 | R | Q | RQ | benign            |
| rs2302685 | NP_002327 | I | V | IV | benign            |
| rs2302686 | NP_002327 | S | C | SC | possibly damaging |
| rs2302691 | NP_004516 | H | Q | HQ | benign            |
| rs2302757 | NP_003580 | K | R | KR | benign            |
| rs2302787 | NP_056328 | P | R | PR | probably damaging |
| rs2302815 | NP_065843 | K | Q | KQ | benign            |
| rs2302819 | NP_001957 | A | T | AT | benign            |
| rs2302824 | NP_525124 | T | M | TM | probably damaging |
| rs2302878 | NP_055429 | I | V | IV | benign            |
| rs2302924 | NP_038478 | G | V | GV | possibly damaging |
| rs2302947 | NP_814444 | V | I | VI | benign            |
| rs2302947 | NP_004596 | V | I | VI | benign            |

|           |           |   |   |    |                   |
|-----------|-----------|---|---|----|-------------------|
| rs2302951 | NP_113673 | R | Q | RQ | benign            |
| rs2302970 | NP_115515 | R | P | RP | benign            |
| rs2302971 | NP_057665 | G | R | GR | possibly damaging |
| rs2302980 | NP_055714 | P | R | PR | probably damaging |
| rs2302987 | NP_085079 | T | A | TA | benign            |
| rs2302987 | NP_000755 | T | A | TA | benign            |
| rs2303007 | NP_005101 | I | V | IV | benign            |
| rs2303015 | NP_005822 | V | A | VA | benign            |
| rs2303016 | NP_005822 | G | R | GR | possibly damaging |
| rs2303018 | NP_006049 | P | S | PS | benign            |
| rs2303053 | NP_003651 | A | S | AS | benign            |
| rs2303077 | NP_036617 | N | K | NK | possibly damaging |
| rs2303077 | NP_036616 | N | K | NK | possibly damaging |
| rs2303078 | NP_036617 | R | H | RH | benign            |
| rs2303078 | NP_036616 | R | H | RH | benign            |
| rs2303080 | NP_076915 | S | T | ST | benign            |
| rs2303080 | NP_002445 | S | T | ST | benign            |
| rs2303098 | NP_056534 | R | H | RH | benign            |
| rs2303100 | NP_477512 | R | Q | RQ | benign            |
| rs2303121 | NP_002194 | P | L | PL | probably damaging |
| rs2303134 | NP_055026 | N | S | NS | benign            |
| rs2303138 | NP_005566 | A | T | AT | benign            |
| rs2303146 | NP_542393 | C | W | CW | benign            |
| rs2303182 | XP_498469 | W | R | WR | possibly damaging |
| rs2303192 | NP_570607 | I | T | IT | possibly damaging |
| rs2303192 | NP_061030 | I | T | IT | possibly damaging |
| rs2303193 | NP_254275 | N | S | NS | benign            |
| rs2303203 | NP_055430 | R | Q | RQ | benign            |
| rs2303217 | NP_064573 | T | S | TS | benign            |
| rs2303255 | NP_055113 | A | V | AV | benign            |
| rs2303262 | NP_005783 | K | R | KR | benign            |
| rs2303267 | NP_005783 | I | V | IV | benign            |
| rs2303269 | NP_000503 | A | S | AS | benign            |
| rs2303270 | NP_000503 | A | T | AT | benign            |
| rs2303291 | NP_062541 | A | T | AT | benign            |
| rs2303291 | NP_006268 | A | T | AT | benign            |
| rs2303312 | NP_064695 | P | S | PS | benign            |
| rs2303345 | XP_495998 | A | V | AV | benign            |
| rs2303361 | NP_631918 | Q | R | QR | benign            |
| rs2303436 | NP_001922 | A | V | AV | benign            |
| rs2303454 | NP_060167 | Y | C | YC | benign            |
| rs2303460 | NP_055497 | R | C | RC | probably damaging |
| rs2303483 | NP_004493 | G | A | GA | benign            |
| rs2303510 | XP_371114 | V | I | VI | benign            |
| rs2303549 | NP_002340 | T | S | TS | benign            |
| rs2303578 | NP_003749 | A | T | AT | benign            |



|           |           |   |   |    |                   |
|-----------|-----------|---|---|----|-------------------|
| rs2303579 | NP_940682 | N | S | NS | benign            |
| rs2303579 | NP_006145 | S | N | SN | benign            |
| rs2303580 | NP_006145 | Q | R | QR | benign            |
| rs2303580 | NP_940682 | R | Q | RQ | benign            |
| rs2303603 | NP_003485 | R | H | RH | possibly damaging |
| rs2303635 | NP_057285 | A | P | AP | benign            |
| rs2303650 | NP_055454 | R | S | RS | possibly damaging |
| rs2303654 | NP_005770 | I | V | IV | benign            |
| rs2303688 | NP_002966 | P | R | PR | possibly damaging |
| rs2303690 | NP_071425 | K | E | KE | benign            |
| rs2303694 | NP_006523 | S | N | SN | benign            |
| rs2303698 | NP_003074 | T | M | TM | benign            |
| rs2303708 | NP_060225 | V | I | VI | benign            |
| rs2303720 | NP_694955 | R | H | RH | possibly damaging |
| rs2303721 | NP_694955 | V | I | VI | benign            |
| rs2303738 | NP_065782 | G | V | GV | benign            |
| rs2303743 | NP_002301 | I | M | IM | benign            |
| rs2303744 | NP_003697 | I | V | IV | benign            |
| rs2303759 | NP_055234 | M | R | MR | benign            |
| rs2303765 | NP_001788 | R | W | RW | probably damaging |
| rs2303765 | NP_387513 | R | W | RW | probably damaging |
| rs2303771 | NP_060036 | T | I | TI | benign            |
| rs2303772 | NP_060036 | L | V | LV | benign            |
| rs2303783 | NP_001288 | L | I | LI | benign            |
| rs2303785 | NP_001288 | K | R | KR | benign            |
| rs2303790 | NP_000069 | D | G | DG | possibly damaging |
| rs2303797 | NP_945328 | P | L | PL | probably damaging |
| rs2303797 | NP_945353 | P | L | PL | probably damaging |
| rs2303797 | NP_004697 | P | L | PL | probably damaging |
| rs2303810 | NP_954672 | R | I | RI | possibly damaging |
| rs2303810 | NP_057669 | R | I | RI | possibly damaging |
| rs2303853 | XP_375376 | G | S | GS | benign            |
| rs2303857 | NP_057225 | R | Q | RQ | possibly damaging |
| rs2303909 | NP_079272 | V | I | VI | benign            |
| rs2303914 | NP_005671 | S | A | SA | benign            |
| rs2303920 | NP_055367 | V | I | VI | benign            |
| rs2303920 | NP_937825 | V | I | VI | benign            |
| rs2303927 | NP_009119 | S | C | SC | benign            |
| rs2303929 | NP_003031 | G | E | GE | probably damaging |
| rs2303956 | NP_055566 | N | I | NI | possibly damaging |
| rs2303978 | XP_371108 | I | V | IV | benign            |
| rs2303983 | NP_061860 | D | G | DG | benign            |
| rs2303986 | NP_114122 | A | V | AV | benign            |
| rs2303995 | NP_004510 | E | G | EG | possibly damaging |
| rs2304019 | NP_055474 | R | W | RW | possibly damaging |
| rs2304024 | NP_001438 | R | W | RW | benign            |

|           |           |   |   |    |                   |
|-----------|-----------|---|---|----|-------------------|
| rs2304029 | NP_001438 | Q | H | QH | benign            |
| rs2304053 | NP_001438 | P | L | PL | probably damaging |
| rs2304103 | NP_689479 | S | L | SL | possibly damaging |
| rs2304114 | NP_057524 | V | I | VI | benign            |
| rs2304133 | XP_032278 | G | S | GS | benign            |
| rs2304167 | NP_057447 | T | A | TA | benign            |
| rs2304172 | XP_032278 | E | Q | EQ | benign            |
| rs2304200 | NP_443122 | R | W | RW | probably damaging |
| rs2304202 | NP_068379 | D | G | DG | possibly damaging |
| rs2304208 | NP_067051 | M | T | MT | benign            |
| rs2304224 | NP_055033 | F | V | FV | possibly damaging |
| rs2304237 | NP_002153 | G | D | GD | possibly damaging |
| rs2304254 | NP_003322 | R | Q | RQ | benign            |
| rs2304255 | NP_003322 | G | S | GS | benign            |
| rs2304256 | NP_003322 | V | F | VF | possibly damaging |
| rs2304303 | NP_671517 | R | H | RH | benign            |
| rs2304303 | NP_056362 | R | H | RH | benign            |
| rs2304305 | NP_671517 | M | I | MI | benign            |
| rs2304305 | NP_056362 | M | I | MI | benign            |
| rs2304306 | NP_671517 | P | L | PL | probably damaging |
| rs2304306 | NP_056362 | P | L | PL | probably damaging |
| rs2304314 | NP_940949 | K | R | KR | benign            |
| rs2304380 | NP_001027 | I | T | IT | benign            |
| rs2304402 | NP_055483 | D | N | DN | benign            |
| rs2304445 | NP_060456 | V | M | VM | benign            |
| rs2304449 | NP_004496 | V | I | VI | benign            |
| rs2304456 | NP_000884 | I | M | IM | benign            |
| rs2304459 | NP_067061 | R | H | RH | possibly damaging |
| rs2304462 | NP_000094 | R | H | RH | benign            |
| rs2304462 | NP_112503 | R | H | RH | benign            |
| rs2304472 | NP_000294 | Q | L | QL | probably damaging |
| rs2304497 | NP_001087 | E | D | ED | benign            |
| rs2304497 | NP_942127 | E | D | ED | benign            |
| rs2304514 | NP_002106 | R | C | RC | possibly damaging |
| rs2304591 | XP_291015 | R | H | RH | benign            |
| rs2304628 | NP_076414 | S | L | SL | benign            |
| rs2304629 | NP_076414 | N | D | ND | benign            |
| rs2304630 | NP_076414 | M | V | MV | benign            |
| rs2304678 | NP_115993 | W | C | WC | probably damaging |
| rs2304681 | NP_006479 | V | I | VI | benign            |
| rs2304681 | NP_000212 | V | I | VI | benign            |
| rs2304693 | NP_004740 | P | L | PL | possibly damaging |
| rs2304694 | NP_004740 | A | S | AS | benign            |
| rs2304705 | NP_003928 | R | Q | RQ | benign            |
| rs2304707 | NP_000419 | P | Q | PQ | probably damaging |
| rs2304735 | NP_037495 | S | L | SL | possibly damaging |

|           |           |   |   |    |                   |
|-----------|-----------|---|---|----|-------------------|
| rs2304748 | NP_079391 | G | E | GE | possibly damaging |
| rs2304778 | NP_115744 | G | D | GD | possibly damaging |
| rs2304789 | NP_003900 | T | M | TM | benign            |
| rs2304802 | NP_060822 | P | Q | PQ | benign            |
| rs2304804 | NP_653191 | Q | P | QP | probably damaging |
| rs2304821 | NP_002828 | T | M | TM | benign            |
| rs2304824 | NP_055977 | M | V | MV | benign            |
| rs2304877 | NP_065208 | R | H | RH | benign            |
| rs2304877 | NP_065209 | R | H | RH | benign            |
| rs2304877 | NP_000028 | R | H | RH | benign            |
| rs2304877 | NP_065210 | R | H | RH | benign            |
| rs2304899 | NP_068595 | M | I | MI | possibly damaging |
| rs2304933 | NP_640342 | V | F | VF | benign            |
| rs2304942 | NP_060419 | P | S | PS | possibly damaging |
| rs2304967 | XP_496206 | A | G | AG | benign            |
| rs2304968 | XP_496206 | Y | C | YC | probably damaging |
| rs2304969 | XP_371006 | V | F | VF | benign            |
| rs2304971 | NP_071342 | M | T | MT | benign            |
| rs2304974 | NP_002789 | P | A | PA | benign            |
| rs2304977 | XP_375397 | P | L | PL | benign            |
| rs2304978 | NP_550436 | R | G | RG | possibly damaging |
| rs2304978 | NP_550434 | R | G | RG | possibly damaging |
| rs2304997 | NP_002882 | V | I | VI | benign            |
| rs2304997 | NP_722522 | V | I | VI | benign            |
| rs2305030 | NP_002335 | R | Q | RQ | benign            |
| rs2305030 | NP_996844 | R | Q | RQ | benign            |
| rs2305053 | NP_443134 | R | C | RC | possibly damaging |
| rs2305072 | NP_976221 | R | T | RT | possibly damaging |
| rs2305089 | NP_003172 | G | D | GD | possibly damaging |
| rs2305123 | NP_077726 | I | V | IV | benign            |
| rs2305124 | NP_077726 | H | R | HR | possibly damaging |
| rs2305160 | NP_002509 | T | A | TA | benign            |
| rs2305165 | NP_056176 | Q | P | QP | benign            |
| rs2305178 | NP_075254 | G | R | GR | benign            |
| rs2305178 | NP_000133 | G | R | GR | benign            |
| rs2305204 | NP_006220 | E | D | ED | benign            |
| rs2305205 | NP_006220 | A | V | AV | benign            |
| rs2305207 | NP_071407 | V | M | VM | benign            |
| rs2305207 | NP_443068 | V | M | VM | benign            |
| rs2305213 | NP_056469 | C | R | CR | benign            |
| rs2305246 | NP_000149 | R | G | RG | benign            |
| rs2305253 | NP_000266 | P | R | PR | probably damaging |
| rs2305257 | NP_542388 | V | I | VI | benign            |
| rs2305276 | NP_005067 | R | W | RW | probably damaging |
| rs2305296 | NP_054879 | I | V | IV | benign            |
| rs2305335 | NP_071768 | H | L | HL | probably damaging |

|           |           |   |   |    |                   |
|-----------|-----------|---|---|----|-------------------|
| rs2305370 | NP_003817 | K | N | KN | benign            |
| rs2305376 | NP_037444 | G | R | GR | benign            |
| rs2305383 | NP_057196 | R | C | RC | probably damaging |
| rs2305397 | XP_371617 | P | L | PL | possibly damaging |
| rs2305398 | XP_371617 | Q | R | QR | benign            |
| rs2305431 | NP_071744 | F | I | FI | possibly damaging |
| rs2305431 | NP_690590 | F | I | FI | possibly damaging |
| rs2305431 | NP_690591 | F | I | FI | possibly damaging |
| rs2305440 | NP_061140 | F | L | FL | benign            |
| rs2305453 | XP_372035 | R | W | RW | possibly damaging |
| rs2305458 | NP_071905 | M | V | MV | benign            |
| rs2305473 | NP_065779 | S | G | SG | benign            |
| rs2305475 | NP_065779 | S | P | SP | possibly damaging |
| rs2305479 | NP_061000 | G | R | GR | possibly damaging |
| rs2305480 | NP_061000 | P | S | PS | possibly damaging |
| rs2305531 | XP_496245 | G | R | GR | possibly damaging |
| rs2305534 | NP_997223 | Q | R | QR | benign            |
| rs2305535 | NP_005691 | R | H | RH | benign            |
| rs2305549 | XP_371259 | H | R | HR | possibly damaging |
| rs2305556 | NP_002266 | K | R | KR | benign            |
| rs2305570 | XP_172801 | E | G | EG | possibly damaging |
| rs2305606 | XP_044622 | P | L | PL | probably damaging |
| rs2305637 | XP_291064 | S | F | SF | benign            |
| rs2305659 | NP_078865 | E | K | EK | benign            |
| rs2305670 | XP_371691 | H | N | HN | possibly damaging |
| rs2305685 | NP_149106 | K | N | KN | benign            |
| rs2305710 | NP_037375 | S | N | SN | benign            |
| rs2305734 | NP_002878 | F | Y | FY | benign            |
| rs2305748 | NP_001028 | T | M | TM | benign            |
| rs2305770 | NP_055257 | E | K | EK | benign            |
| rs2305773 | NP_942143 | L | V | LV | benign            |
| rs2305773 | NP_001236 | L | V | LV | benign            |
| rs2305773 | NP_942142 | L | V | LV | benign            |
| rs2305777 | NP_060191 | T | M | TM | benign            |
| rs2305780 | NP_002909 | T | A | TA | benign            |
| rs2305793 | NP_064615 | G | V | GV | probably damaging |
| rs2305799 | NP_001602 | V | M | VM | benign            |
| rs2305816 | NP_777619 | F | C | FC | possibly damaging |
| rs2305820 | NP_000879 | P | T | PT | probably damaging |
| rs2305830 | XP_374936 | T | S | TS | benign            |
| rs2305873 | NP_659731 | A | T | AT | benign            |
| rs2305913 | XP_371079 | R | G | RG | benign            |
| rs2305925 | NP_689997 | T | S | TS | benign            |
| rs2305935 | NP_056156 | V | A | VA | benign            |
| rs2305948 | NP_002244 | V | I | VI | benign            |
| rs2305962 | XP_068632 | A | P | AP | benign            |

|           |           |   |   |    |                   |
|-----------|-----------|---|---|----|-------------------|
| rs2305984 | XP_113678 | A | T | AT | benign            |
| rs2305993 | NP_003053 | E | G | EG | benign            |
| rs2306009 | NP_073153 | A | D | AD | benign            |
| rs2306022 | NP_036343 | V | M | VM | benign            |
| rs2306024 | NP_036343 | M | L | ML | benign            |
| rs2306029 | XP_035037 | S | G | SG | benign            |
| rs2306031 | XP_035037 | A | T | AT | benign            |
| rs2306033 | XP_035037 | A | V | AV | benign            |
| rs2306059 | NP_942592 | H | Y | HY | benign            |
| rs2306059 | NP_115593 | H | Y | HY | possibly damaging |
| rs2306066 | NP_060187 | D | N | DN | benign            |
| rs2306066 | NP_112554 | D | N | DN | benign            |
| rs2306066 | NP_068743 | D | N | DN | benign            |
| rs2306122 | NP_003806 | P | H | PH | probably damaging |
| rs2306122 | NP_997077 | P | H | PH | probably damaging |
| rs2306122 | NP_997078 | P | H | PH | probably damaging |
| rs2306122 | NP_997079 | P | H | PH | probably damaging |
| rs2306122 | NP_997080 | P | H | PH | probably damaging |
| rs2306122 | NP_997074 | P | H | PH | probably damaging |
| rs2306131 | NP_055844 | E | A | EA | benign            |
| rs2306134 | NP_005125 | S | N | SN | benign            |
| rs2306168 | NP_009187 | S | F | SF | benign            |
| rs2306174 | NP_848592 | R | H | RH | benign            |
| rs2306175 | NP_848592 | L | P | LP | probably damaging |
| rs2306180 | NP_068776 | V | M | VM | benign            |
| rs2306182 | NP_031386 | N | S | NS | benign            |
| rs2306211 | NP_006587 | A | V | AV | benign            |
| rs2306211 | NP_955452 | A | V | AV | benign            |
| rs2306235 | NP_057358 | P | A | PA | benign            |
| rs2306236 | NP_005461 | G | A | GA | possibly damaging |
| rs2306242 | NP_005246 | K | R | KR | benign            |
| rs2306259 | NP_077726 | G | D | GD | benign            |
| rs2306265 | XP_043613 | V | I | VI | benign            |
| rs2306277 | XP_375185 | L | P | LP | probably damaging |
| rs2306282 | NP_006437 | N | S | NS | benign            |
| rs2306283 | NP_006437 | D | N | DN | benign            |
| rs2306322 | NP_055582 | G | S | GS | possibly damaging |
| rs2306323 | NP_055582 | S | R | SR | benign            |
| rs2306331 | NP_031373 | C | R | CR | possibly damaging |
| rs2306369 | XP_371706 | T | A | TA | benign            |
| rs2306384 | NP_038460 | G | S | GS | benign            |
| rs2306387 | NP_612440 | G | R | GR | possibly damaging |
| rs2306392 | NP_059136 | L | P | LP | possibly damaging |
| rs2306407 | NP_054742 | I | V | IV | benign            |
| rs2306448 | XP_211908 | R | C | RC | probably damaging |
| rs2306465 | NP_009212 | P | L | PL | probably damaging |

|           |           |   |   |    |                   |
|-----------|-----------|---|---|----|-------------------|
| rs2306512 | NP_060566 | S | N | SN | benign            |
| rs2306513 | NP_060566 | Y | H | YH | possibly damaging |
| rs2306536 | NP_060693 | V | M | VM | benign            |
| rs2306541 | NP_060693 | A | V | AV | benign            |
| rs2306575 | NP_008832 | H | Q | HQ | possibly damaging |
| rs2306598 | NP_002904 | L | V | LV | benign            |
| rs2306618 | NP_001173 | T | A | TA | benign            |
| rs2306636 | NP_596870 | S | N | SN | benign            |
| rs2306640 | NP_073586 | G | S | GS | benign            |
| rs2306675 | NP_387450 | D | E | DE | possibly damaging |
| rs2306675 | NP_004352 | D | E | DE | possibly damaging |
| rs2306691 | NP_002323 | N | D | ND | benign            |
| rs2306715 | NP_003719 | G | V | GV | probably damaging |
| rs2306727 | NP_055447 | I | V | IV | benign            |
| rs2306734 | NP_003909 | V | A | VA | benign            |
| rs2306735 | NP_003909 | H | R | HR | possibly damaging |
| rs2306764 | NP_976227 | A | T | AT | benign            |
| rs2306764 | NP_005442 | A | T | AT | benign            |
| rs2306765 | NP_112579 | F | L | FL | benign            |
| rs2306765 | NP_722545 | F | L | FL | possibly damaging |
| rs2306785 | NP_004692 | V | I | VI | benign            |
| rs2306852 | NP_060634 | M | T | MT | possibly damaging |
| rs2306857 | NP_056227 | I | F | IF | benign            |
| rs2306858 | NP_056227 | P | S | PS | possibly damaging |
| rs2306872 | NP_775949 | R | Q | RQ | benign            |
| rs2306890 | XP_371655 | L | I | LI | benign            |
| rs2306894 | NP_057595 | G | A | GA | benign            |
| rs2306897 | NP_150594 | R | L | RL | probably damaging |
| rs2306897 | NP_006449 | R | L | RL | probably damaging |
| rs2306899 | XP_291291 | T | M | TM | benign            |
| rs2306914 | NP_149062 | T | M | TM | benign            |
| rs2306914 | NP_892006 | T | M | TM | benign            |
| rs2306916 | NP_149062 | L | M | LM | benign            |
| rs2306916 | NP_892006 | M | L | ML | benign            |
| rs2306923 | NP_612398 | R | H | RH | benign            |
| rs2306942 | NP_000417 | V | M | VM | benign            |
| rs2306983 | NP_777567 | P | L | PL | probably damaging |
| rs2306985 | NP_000244 | H | Q | HQ | benign            |
| rs2306986 | NP_000244 | E | D | ED | benign            |
| rs2307044 | NP_003808 | L | V | LV | benign            |
| rs2307091 | XP_371619 | E | V | EV | possibly damaging |
| rs2307092 | XP_371619 | E | K | EK | benign            |
| rs2307111 | NP_689621 | H | R | HR | benign            |
| rs2307145 | NP_001550 | Q | H | QH | possibly damaging |
| rs2307146 | NP_001550 | I | V | IV | benign            |
| rs2307148 | NP_001550 | G | R | GR | possibly damaging |

|           |           |   |   |    |                   |
|-----------|-----------|---|---|----|-------------------|
| rs2307153 | NP_001550 | G | D | GD | benign            |
| rs2307154 | NP_001550 | A | V | AV | benign            |
| rs2307166 | NP_006288 | R | W | RW | probably damaging |
| rs2307167 | NP_006288 | R | Q | RQ | benign            |
| rs2307171 | NP_006288 | V | M | VM | benign            |
| rs2307180 | NP_006288 | E | K | EK | benign            |
| rs2307184 | NP_006288 | S | Y | SY | possibly damaging |
| rs2307186 | NP_006288 | R | L | RL | possibly damaging |
| rs2307188 | NP_006288 | K | N | KN | benign            |
| rs2307191 | NP_006288 | P | L | PL | probably damaging |
| rs2307198 | NP_077734 | K | R | KR | benign            |
| rs2307227 | NP_001257 | D | E | DE | benign            |
| rs2307240 | NP_001257 | S | N | SN | benign            |
| rs2307243 | NP_001257 | R | H | RH | benign            |
| rs2307254 | NP_004498 | Q | K | QK | benign            |
| rs2307255 | NP_004498 | I | V | IV | benign            |
| rs2307261 | NP_004498 | S | G | SG | benign            |
| rs2307279 | NP_003697 | A | P | AP | benign            |
| rs2307282 | NP_003697 | R | G | RG | probably damaging |
| rs2307289 | NP_003916 | S | P | SP | benign            |
| rs2307293 | NP_003916 | D | H | DH | possibly damaging |
| rs2307296 | NP_003916 | C | R | CR | benign            |
| rs2307298 | NP_003916 | I | T | IT | possibly damaging |
| rs2307302 | NP_056979 | S | P | SP | possibly damaging |
| rs2307303 | NP_056979 | T | M | TM | possibly damaging |
| rs2307306 | NP_056979 | R | W | RW | probably damaging |
| rs2307307 | NP_056979 | L | F | LF | benign            |
| rs2307311 | NP_004517 | V | M | VM | benign            |
| rs2307313 | NP_004517 | A | T | AT | benign            |
| rs2307314 | NP_004517 | L | F | LF | benign            |
| rs2307328 | NP_002379 | F | L | FL | benign            |
| rs2307329 | NP_002379 | D | V | DV | probably damaging |
| rs2307332 | NP_002379 | S | G | SG | possibly damaging |
| rs2307334 | NP_006730 | S | T | ST | benign            |
| rs2307340 | NP_006730 | T | S | TS | benign            |
| rs2307347 | NP_877577 | G | S | GS | possibly damaging |
| rs2307348 | NP_005907 | R | Q | RQ | possibly damaging |
| rs2307361 | NP_006181 | M | K | MK | probably damaging |
| rs2307365 | NP_862820 | Q | K | QK | benign            |
| rs2307365 | NP_036513 | Q | K | QK | benign            |
| rs2307370 | NP_862820 | R | C | RC | probably damaging |
| rs2307370 | NP_036513 | R | C | RC | probably damaging |
| rs2307371 | NP_862820 | Q | R | QR | possibly damaging |
| rs2307371 | NP_036513 | Q | R | QR | possibly damaging |
| rs2307372 | NP_862820 | T | P | TP | possibly damaging |
| rs2307372 | NP_036513 | T | P | TP | possibly damaging |

|           |           |   |   |    |                   |
|-----------|-----------|---|---|----|-------------------|
| rs2307374 | NP_862820 | I | V | IV | benign            |
| rs2307374 | NP_036513 | I | V | IV | benign            |
| rs2307381 | NP_862820 | T | M | TM | benign            |
| rs2307381 | NP_036513 | T | M | TM | benign            |
| rs2307389 | NP_862820 | V | I | VI | benign            |
| rs2307389 | NP_036513 | V | I | VI | benign            |
| rs2307394 | NP_859525 | N | S | NS | benign            |
| rs2307394 | NP_859526 | N | S | NS | benign            |
| rs2307394 | NP_002543 | N | S | NS | benign            |
| rs2307397 | NP_859525 | L | V | LV | benign            |
| rs2307397 | NP_859526 | L | V | LV | benign            |
| rs2307397 | NP_002543 | L | V | LV | benign            |
| rs2307402 | NP_859531 | R | C | RC | probably damaging |
| rs2307402 | NP_002544 | R | C | RC | probably damaging |
| rs2307413 | NP_859531 | K | N | KN | benign            |
| rs2307413 | NP_002544 | K | N | KN | benign            |
| rs2307437 | NP_002684 | P | S | PS | benign            |
| rs2307440 | NP_002684 | R | C | RC | probably damaging |
| rs2307441 | NP_002684 | E | G | EG | benign            |
| rs2307442 | NP_002684 | R | W | RW | possibly damaging |
| rs2307447 | NP_002684 | R | C | RC | benign            |
| rs2307450 | NP_002684 | E | K | EK | benign            |
| rs2307456 | NP_006493 | G | V | GV | possibly damaging |
| rs2307486 | NP_001632 | I | V | IV | benign            |
| rs2307486 | NP_542379 | I | V | IV | benign            |
| rs2307486 | NP_542380 | I | V | IV | benign            |
| rs2307491 | NP_000114 | S | C | SC | possibly damaging |
| rs2307492 | NP_001451 | F | S | FS | probably damaging |
| rs2308312 | NP_002425 | R | Q | RQ | benign            |
| rs2308313 | NP_002425 | R | C | RC | probably damaging |
| rs2308315 | NP_002425 | P | L | PL | probably damaging |
| rs2308317 | NP_000240 | V | M | VM | benign            |
| rs2308318 | NP_002403 | G | R | GR | probably damaging |
| rs2308320 | NP_002403 | E | D | ED | benign            |
| rs2308321 | NP_002403 | I | V | IV | benign            |
| rs2308322 | NP_002403 | P | S | PS | benign            |
| rs2308330 | NP_005505 | L | R | LR | benign            |
| rs2308331 | NP_005505 | M | T | MT | benign            |
| rs2308335 | NP_005505 | S | W | SW | benign            |
| rs2308339 | NP_005505 | L | V | LV | benign            |
| rs2308468 | NP_005505 | E | D | ED | benign            |
| rs2308473 | NP_005505 | D | E | DE | benign            |
| rs2308474 | NP_005505 | K | T | KT | benign            |
| rs2308480 | NP_005505 | I | L | IL | benign            |
| rs2308481 | NP_005505 | A | V | AV | benign            |
| rs2308483 | NP_005505 | A | G | AG | benign            |



|           |           |   |   |    |                   |
|-----------|-----------|---|---|----|-------------------|
| rs2308487 | NP_005505 | R | G | RG | benign            |
| rs2308488 | NP_005505 | A | T | AT | benign            |
| rs2308489 | NP_005505 | P | L | PL | benign            |
| rs2308490 | NP_005505 | E | Q | EQ | benign            |
| rs2308497 | NP_005505 | K | E | KE | benign            |
| rs2308498 | NP_005505 | L | F | LF | benign            |
| rs2308499 | NP_005505 | L | R | LR | possibly damaging |
| rs2308500 | NP_005505 | E | K | EK | benign            |
| rs2308503 | NP_005505 | V | I | VI | benign            |
| rs2308514 | NP_005505 | I | V | IV | benign            |
| rs2308515 | NP_005505 | I | M | IM | benign            |
| rs2308516 | NP_005505 | G | A | GA | benign            |
| rs2308520 | NP_005505 | M | V | MV | benign            |
| rs2308598 | NP_005505 | R | G | RG | probably damaging |
| rs2308599 | NP_005505 | E | K | EK | benign            |
| rs2308601 | NP_005505 | G | R | GR | probably damaging |
| rs2308602 | NP_005505 | K | E | KE | possibly damaging |
| rs2308603 | NP_005505 | D | N | DN | benign            |
| rs2308604 | NP_005505 | A | T | AT | benign            |
| rs2308662 | NP_002115 | A | S | AS | benign            |
| rs2308664 | NP_002115 | R | K | RK | benign            |
| rs2308758 | NP_002115 | K | E | KE | benign            |
| rs2308760 | NP_002115 | S | A | SA | benign            |
| rs2308765 | NP_002116 | N | S | NS | benign            |
| rs2308765 | NP_002115 | S | N | SN | benign            |
| rs2308766 | NP_002115 | R | L | RL | benign            |
| rs2308766 | NP_002116 | R | L | RL | benign            |
| rs2308768 | NP_002115 | A | T | AT | benign            |
| rs2308768 | NP_002116 | A | T | AT | benign            |
| rs2308769 | NP_002115 | V | M | VM | benign            |
| rs2308769 | NP_002116 | V | M | VM | benign            |
| rs2308771 | NP_002115 | Q | H | QH | benign            |
| rs2308771 | NP_002116 | Q | H | QH | benign            |
| rs2308773 | NP_002115 | V | F | VF | benign            |
| rs2308773 | NP_002116 | V | F | VF | benign            |
| rs2308775 | NP_002115 | R | Q | RQ | benign            |
| rs2308775 | NP_002116 | R | Q | RQ | benign            |
| rs2308780 | NP_002115 | T | M | TM | benign            |
| rs2308784 | NP_002115 | Q | P | QP | benign            |
| rs2308785 | NP_002115 | T | R | TR | benign            |
| rs2308786 | NP_002115 | L | S | LS | benign            |
| rs2308786 | NP_072049 | L | S | LS | benign            |
| rs2308787 | NP_072049 | E | Q | EQ | benign            |
| rs2308788 | NP_072049 | R | C | RC | benign            |
| rs2308789 | NP_072049 | R | L | RL | benign            |
| rs2308790 | NP_072049 | Y | H | YH | benign            |

|           |           |   |   |    |                   |
|-----------|-----------|---|---|----|-------------------|
| rs2308791 | NP_072049 | Y | F | YF | benign            |
| rs2308797 | NP_072049 | L | V | LV | benign            |
| rs2308798 | NP_072049 | L | P | LP | probably damaging |
| rs2308799 | NP_072049 | T | R | TR | benign            |
| rs2308800 | NP_072049 | V | I | VI | benign            |
| rs2308801 | NP_072049 | V | D | VD | benign            |
| rs2308803 | NP_072049 | S | Y | SY | benign            |
| rs2308804 | NP_072049 | L | I | LI | benign            |
| rs2308805 | NP_072049 | R | Q | RQ | benign            |
| rs2308809 | NP_072049 | G | A | GA | benign            |
| rs2308816 | NP_072049 | V | F | VF | benign            |
| rs2308819 | NP_072049 | A | P | AP | possibly damaging |
| rs2308883 | NP_002113 | S | A | SA | benign            |
| rs2308885 | NP_002113 | A | S | AS | benign            |
| rs2308891 | NP_064440 | E | K | EK | benign            |
| rs2308891 | NP_002113 | Q | K | QK | benign            |
| rs2308903 | NP_291032 | A | T | AT | benign            |
| rs2308907 | NP_291032 | P | T | PT | possibly damaging |
| rs2308910 | NP_291032 | E | D | ED | benign            |
| rs2308911 | NP_291032 | M | L | ML | benign            |
| rs2308912 | NP_291032 | M | K | MK | possibly damaging |
| rs2308916 | NP_291032 | A | T | AT | benign            |
| rs2308917 | NP_291032 | L | S | LS | benign            |
| rs2308918 | NP_291032 | T | I | TI | benign            |
| rs2308919 | NP_291032 | L | V | LV | benign            |
| rs2308920 | NP_291032 | L | S | LS | benign            |
| rs2308921 | NP_291032 | L | F | LF | benign            |
| rs2308922 | NP_291032 | T | A | TA | benign            |
| rs2308925 | NP_291032 | P | A | PA | probably damaging |
| rs2308930 | NP_291032 | L | P | LP | benign            |
| rs2308934 | NP_291032 | T | A | TA | possibly damaging |
| rs2308935 | NP_291032 | T | P | TP | benign            |
| rs2308938 | NP_127463 | L | V | LV | benign            |
| rs2308938 | NP_001220 | L | V | LV | benign            |
| rs2308939 | NP_001220 | R | S | RS | benign            |
| rs2308941 | NP_127463 | T | I | TI | benign            |
| rs2308941 | NP_001220 | T | I | TI | benign            |
| rs2308949 | NP_001220 | G | R | GR | possibly damaging |
| rs2308950 | NP_001220 | R | H | RH | possibly damaging |
| rs2308951 | NP_596868 | A | G | AG | benign            |
| rs2308957 | NP_596868 | G | D | GD | possibly damaging |
| rs2309428 | NP_963923 | D | E | DE | benign            |
| rs2309428 | NP_004808 | D | E | DE | benign            |
| rs2309689 | NP_000009 | G | D | GD | possibly damaging |
| rs2309808 | XP_085578 | R | H | RH | possibly damaging |
| rs2311020 | NP_113663 | L | P | LP | possibly damaging |

|           |           |   |   |    |                   |
|-----------|-----------|---|---|----|-------------------|
| rs2312195 | XP_172341 | K | Q | KQ | benign            |
| rs2312296 | NP_005923 | A | V | AV | benign            |
| rs2312365 | XP_291200 | E | K | EK | benign            |
| rs2312366 | XP_376618 | E | G | EG | possibly damaging |
| rs2312367 | XP_376618 | W | R | WR | possibly damaging |
| rs2312368 | XP_291200 | G | R | GR | possibly damaging |
| rs2314078 | NP_005620 | R | C | RC | benign            |
| rs2314079 | NP_005620 | Q | K | QK | benign            |
| rs2314668 | NP_036313 | E | Q | EQ | benign            |
| rs2314808 | NP_695024 | E | K | EK | benign            |
| rs2314808 | NP_000616 | E | K | EK | possibly damaging |
| rs2315122 | NP_064445 | I | V | IV | benign            |
| rs2315123 | NP_064445 | F | L | FL | benign            |
| rs2315124 | NP_064445 | F | L | FL | benign            |
| rs2315126 | NP_064445 | Y | F | YF | benign            |
| rs2315127 | NP_064445 | V | F | VF | possibly damaging |
| rs2315702 | XP_497024 | P | L | PL | benign            |
| rs2315702 | XP_497089 | P | L | PL | probably damaging |
| rs2316334 | XP_496418 | F | S | FS | benign            |
| rs2317672 | NP_003543 | A | V | AV | benign            |
| rs2317941 | XP_211858 | M | T | MT | probably damaging |
| rs2317942 | XP_211858 | C | R | CR | benign            |
| rs2317943 | XP_211858 | I | T | IT | possibly damaging |
| rs2318277 | XP_372500 | T | A | TA | benign            |
| rs2318279 | XP_372500 | P | S | PS | benign            |
| rs2318280 | XP_372500 | R | L | RL | benign            |
| rs2318549 | XP_497391 | E | K | EK | benign            |
| rs2319055 | NP_859076 | P | L | PL | probably damaging |
| rs2319796 | NP_872308 | A | D | AD | benign            |
| rs2319797 | NP_872308 | S | T | ST | benign            |
| rs2319850 | XP_037817 | A | T | AT | benign            |
| rs2320123 | NP_072166 | K | Q | KQ | benign            |
| rs2320227 | NP_149049 | R | C | RC | probably damaging |
| rs2320231 | NP_149049 | R | H | RH | benign            |
| rs2322334 | XP_209910 | V | A | VA | benign            |
| rs2322335 | XP_209910 | M | R | MR | probably damaging |
| rs2322336 | XP_209910 | R | H | RH | benign            |
| rs2322337 | XP_209910 | S | P | SP | possibly damaging |
| rs2322339 | XP_209910 | V | I | VI | benign            |
| rs2322340 | XP_209910 | G | R | GR | benign            |
| rs2322343 | XP_209910 | R | C | RC | possibly damaging |
| rs2322659 | NP_002290 | N | S | NS | possibly damaging |
| rs2324645 | NP_060646 | I | T | IT | benign            |
| rs2326391 | NP_005144 | P | S | PS | benign            |
| rs2330126 | NP_543029 | D | N | DN | benign            |
| rs2330126 | NP_954578 | D | N | DN | benign            |

|           |           |   |   |    |                   |
|-----------|-----------|---|---|----|-------------------|
| rs2330573 | NP_057533 | V | A | VA | benign            |
| rs2330724 | XP_371424 | V | M | VM | benign            |
| rs2330836 | NP_038347 | A | T | AT | possibly damaging |
| rs2330837 | NP_038347 | S | L | SL | probably damaging |
| rs2330838 | NP_038347 | K | E | KE | benign            |
| rs2330842 | NP_038347 | G | V | GV | probably damaging |
| rs2330991 | NP_000487 | R | W | RW | probably damaging |
| rs2330992 | NP_000487 | Q | R | QR | possibly damaging |
| rs2331251 | NP_690054 | S | F | SF | benign            |
| rs2331251 | NP_071364 | S | F | SF | benign            |
| rs2331251 | NP_690055 | S | F | SF | possibly damaging |
| rs2331251 | NP_690056 | S | F | SF | possibly damaging |
| rs2331995 | XP_046531 | N | D | ND | benign            |
| rs2332285 | NP_612144 | R | K | RK | benign            |
| rs2332855 | NP_004636 | K | R | KR | benign            |
| rs2332856 | NP_004636 | I | M | IM | benign            |
| rs2335052 | NP_116027 | A | T | AT | benign            |
| rs2335238 | NP_060677 | S | T | ST | benign            |
| rs2335390 | NP_689653 | I | M | IM | benign            |
| rs2336029 | NP_689845 | V | M | VM | benign            |
| rs2336219 | NP_036231 | D | N | DN | benign            |
| rs2336573 | NP_057663 | G | R | GR | possibly damaging |
| rs2338445 | XP_290482 | K | N | KN | benign            |
| rs2338445 | XP_350781 | K | N | KN | benign            |
| rs2338541 | XP_374801 | Q | H | QH | benign            |
| rs2338541 | XP_084445 | Q | H | QH | benign            |
| rs2339241 | NP_000140 | S | P | SP | benign            |
| rs2339844 | NP_065142 | C | G | CG | benign            |
| rs2340550 | NP_848620 | S | F | SF | possibly damaging |
| rs2340601 | NP_061868 | V | I | VI | benign            |
| rs2340664 | NP_002656 | T | A | TA | possibly damaging |
| rs2340665 | NP_002656 | P | A | PA | possibly damaging |
| rs2340676 | XP_496559 | R | H | RH | benign            |
| rs2340885 | NP_073728 | V | M | VM | benign            |
| rs2340917 | NP_077310 | M | T | MT | benign            |
| rs2340940 | NP_955453 | C | F | CF | probably damaging |
| rs2341097 | NP_787071 | V | M | VM | benign            |
| rs2341432 | XP_291806 | L | H | LH | probably damaging |
| rs2341433 | XP_291806 | A | T | AT | benign            |
| rs2341434 | XP_291806 | H | R | HR | probably damaging |
| rs2342767 | NP_631904 | V | L | VL | benign            |
| rs2343914 | XP_496448 | E | G | EG | possibly damaging |
| rs2344784 | XP_370839 | D | H | DH | benign            |
| rs2344784 | XP_496096 | D | H | DH | benign            |
| rs2344786 | XP_370839 | I | M | IM | benign            |
| rs2344786 | XP_496096 | I | M | IM | benign            |

|           |           |   |   |    |                   |
|-----------|-----------|---|---|----|-------------------|
| rs2344789 | XP_370839 | I | V | IV | benign            |
| rs2344789 | XP_496096 | I | V | IV | benign            |
| rs2345793 | XP_376554 | S | L | SL | benign            |
| rs2345794 | XP_376554 | E | G | EG | possibly damaging |
| rs2346086 | NP_004658 | A | T | AT | benign            |
| rs2347131 | NP_940908 | A | T | AT | benign            |
| rs2347132 | NP_940908 | T | M | TM | benign            |
| rs2348049 | NP_848658 | F | Y | FY | benign            |
| rs2348353 | NP_872398 | T | A | TA | benign            |
| rs2351198 | XP_294634 | E | D | ED | benign            |
| rs2351312 | NP_598000 | N | Y | NY | probably damaging |
| rs2353008 | NP_085076 | S | F | SF | possibly damaging |
| rs2353008 | NP_003771 | S | F | SF | possibly damaging |
| rs2353055 | NP_683759 | S | T | ST | benign            |
| rs2353056 | NP_683759 | S | G | SG | benign            |
| rs2353056 | NP_060514 | S | G | SG | benign            |
| rs2353552 | NP_861524 | H | Q | HQ | benign            |
| rs2354336 | XP_371956 | G | V | GV | benign            |
| rs2355434 | NP_002772 | K | N | KN | benign            |
| rs2355436 | NP_002772 | L | P | LP | benign            |
| rs2355442 | NP_002771 | V | A | VA | benign            |
| rs2355447 | NP_002775 | G | R | GR | benign            |
| rs2355450 | NP_002775 | I | N | IN | benign            |
| rs2355877 | NP_116269 | R | H | RH | benign            |
| rs2356437 | XP_371174 | C | R | CR | benign            |
| rs2356590 | NP_001072 | P | T | PT | probably damaging |
| rs2356643 | NP_036355 | Y | C | YC | probably damaging |
| rs2356696 | NP_997625 | T | A | TA | possibly damaging |
| rs2358770 | XP_370968 | R | K | RK | benign            |
| rs2358962 | NP_597730 | E | D | ED | benign            |
| rs2359016 | NP_659484 | K | E | KE | benign            |
| rs2359021 | XP_497652 | C | Y | CY | benign            |
| rs2359022 | XP_497652 | V | A | VA | benign            |
| rs2359074 | XP_497653 | I | V | IV | benign            |
| rs2359074 | XP_377566 | I | V | IV | benign            |
| rs2359075 | XP_497653 | G | R | GR | benign            |
| rs2359075 | XP_377566 | G | R | GR | benign            |
| rs2359263 | XP_497653 | Y | C | YC | benign            |
| rs2359264 | XP_497653 | N | D | ND | benign            |
| rs2359265 | XP_497653 | Y | C | YC | benign            |
| rs2359266 | XP_497653 | D | H | DH | benign            |
| rs2359267 | XP_497653 | R | K | RK | benign            |
| rs2359268 | XP_497653 | K | N | KN | benign            |
| rs2359270 | XP_497653 | T | A | TA | benign            |
| rs2359294 | XP_372763 | W | R | WR | benign            |
| rs2359484 | XP_291395 | L | I | LI | benign            |

|           |           |   |   |    |                   |
|-----------|-----------|---|---|----|-------------------|
| rs2359486 | XP_291395 | D | N | DN | benign            |
| rs2359488 | XP_291395 | E | Q | EQ | benign            |
| rs2359489 | XP_291395 | E | D | ED | benign            |
| rs2359490 | XP_291395 | D | N | DN | benign            |
| rs2359491 | XP_291395 | D | N | DN | benign            |
| rs2359492 | XP_291395 | E | D | ED | benign            |
| rs2359493 | XP_291395 | D | N | DN | benign            |
| rs2360543 | NP_065931 | Q | H | QH | benign            |
| rs2360887 | NP_733751 | V | I | VI | benign            |
| rs2361159 | XP_372198 | S | L | SL | benign            |
| rs2361503 | XP_371603 | E | G | EG | possibly damaging |
| rs2363198 | NP_659731 | V | M | VM | benign            |
| rs2363468 | NP_055855 | S | L | SL | benign            |
| rs2363681 | XP_372991 | R | G | RG | possibly damaging |
| rs2363956 | NP_689576 | L | W | LW | benign            |
| rs2364172 | NP_002198 | Q | K | QK | benign            |
| rs2364448 | NP_055328 | L | I | LI | benign            |
| rs2364450 | NP_055328 | G | E | GE | benign            |
| rs2364452 | NP_055328 | R | S | RS | benign            |
| rs2364600 | NP_036423 | A | V | AV | benign            |
| rs2364652 | NP_002198 | S | P | SP | benign            |
| rs2364653 | NP_002198 | F | L | FL | benign            |
| rs2364782 | NP_056957 | E | D | ED | benign            |
| rs2364790 | NP_006216 | G | R | GR | benign            |
| rs2365218 | NP_036444 | P | S | PS | benign            |
| rs2365227 | NP_056952 | V | A | VA | benign            |
| rs2365227 | NP_055326 | V | A | VA | benign            |
| rs2365718 | NP_006608 | S | N | SN | benign            |
| rs2365725 | NP_849159 | E | G | EG | possibly damaging |
| rs2365902 | NP_775901 | F | L | FL | benign            |
| rs2365955 | NP_002832 | A | S | AS | benign            |
| rs2365981 | NP_055642 | K | E | KE | benign            |
| rs2365982 | NP_055642 | K | E | KE | benign            |
| rs2366894 | NP_057336 | S | T | ST | benign            |
| rs2367414 | XP_371645 | V | I | VI | benign            |
| rs2367810 | NP_997212 | C | W | CW | probably damaging |
| rs2368192 | NP_872619 | W | R | WR | probably damaging |
| rs2368406 | NP_003165 | A | P | AP | benign            |
| rs2368406 | NP_068506 | A | P | AP | benign            |
| rs2369063 | NP_000287 | L | P | LP | possibly damaging |
| rs2369066 | NP_000287 | V | I | VI | benign            |
| rs2369069 | NP_000287 | Q | R | QR | benign            |
| rs2369220 | XP_209728 | C | W | CW | probably damaging |
| rs2369679 | NP_689540 | K | N | KN | possibly damaging |
| rs2371800 | NP_005056 | E | K | EK | benign            |
| rs2372536 | NP_004035 | T | S | TS | benign            |

|           |           |   |   |    |                   |
|-----------|-----------|---|---|----|-------------------|
| rs2373396 | NP_689919 | D | H | DH | probably damaging |
| rs2373397 | NP_689919 | E | K | EK | benign            |
| rs2373398 | NP_689919 | E | A | EA | benign            |
| rs2375003 | NP_000931 | D | N | DN | benign            |
| rs2375213 | XP_497306 | E | G | EG | possibly damaging |
| rs2375214 | XP_497306 | D | E | DE | benign            |
| rs2375465 | NP_940853 | V | A | VA | benign            |
| rs2375544 | NP_061720 | P | L | PL | probably damaging |
| rs2375643 | NP_061720 | A | T | AT | benign            |
| rs2376291 | NP_116738 | S | P | SP | benign            |
| rs2376291 | NP_116739 | S | P | SP | benign            |
| rs2376869 | NP_006500 | F | I | FI | benign            |
| rs2376876 | XP_047462 | S | Y | SY | benign            |
| rs2377741 | NP_002855 | T | P | TP | probably damaging |
| rs2377921 | XP_496581 | P | S | PS | benign            |
| rs2378596 | NP_073742 | R | S | RS | possibly damaging |
| rs2381002 | NP_001161 | E | K | EK | possibly damaging |
| rs2381003 | NP_001161 | L | V | LV | benign            |
| rs2381004 | NP_001161 | V | A | VA | benign            |
| rs2382644 | NP_694941 | W | R | WR | probably damaging |
| rs2382647 | NP_861455 | H | N | HN | benign            |
| rs2384572 | NP_006560 | I | M | IM | benign            |
| rs2384703 | NP_443723 | I | T | IT | benign            |
| rs2384951 | NP_056505 | K | Q | KQ | benign            |
| rs2385006 | NP_116078 | R | H | RH | benign            |
| rs2385070 | NP_055418 | E | G | EG | probably damaging |
| rs2385182 | XP_030378 | P | L | PL | probably damaging |
| rs2387702 | XP_498797 | S | N | SN | benign            |
| rs2388544 | NP_002119 | P | L | PL | benign            |
| rs2388556 | NP_055704 | V | I | VI | benign            |
| rs2389105 | NP_036193 | E | D | ED | benign            |
| rs2389105 | NP_036192 | E | D | ED | benign            |
| rs2389105 | NP_005681 | E | D | ED | benign            |
| rs2391199 | XP_496372 | I | V | IV | benign            |
| rs2394051 | NP_665916 | G | E | GE | possibly damaging |
| rs2394395 | NP_821133 | T | S | TS | benign            |
| rs2394397 | NP_821133 | S | L | SL | probably damaging |
| rs2394398 | NP_821133 | R | G | RG | probably damaging |
| rs2394516 | XP_498069 | V | A | VA | possibly damaging |
| rs2395085 | NP_115859 | Q | R | QR | benign            |
| rs2395378 | NP_003181 | E | A | EA | possibly damaging |
| rs2395378 | NP_757346 | E | A | EA | possibly damaging |
| rs2395378 | NP_757345 | E | A | EA | possibly damaging |
| rs2395617 | NP_071330 | T | N | TN | benign            |
| rs2396359 | NP_065746 | S | G | SG | benign            |
| rs2396519 | XP_051221 | R | P | RP | probably damaging |

|           |           |   |   |    |                   |
|-----------|-----------|---|---|----|-------------------|
| rs2397084 | NP_443104 | E | G | EG | possibly damaging |
| rs2397084 | NP_758846 | E | G | EG | possibly damaging |
| rs2397118 | NP_714543 | V | I | VI | benign            |
| rs2397965 | NP_659461 | R | Q | RQ | benign            |
| rs2401751 | NP_008970 | F | L | FL | benign            |
| rs2401930 | NP_036349 | I | V | IV | benign            |
| rs2401931 | NP_036349 | G | D | GD | benign            |
| rs2401936 | NP_036349 | T | A | TA | benign            |
| rs2401937 | NP_036349 | G | V | GV | probably damaging |
| rs2402073 | NP_689545 | T | K | TK | benign            |
| rs2402730 | XP_069743 | I | V | IV | benign            |
| rs2402731 | XP_069743 | G | D | GD | probably damaging |
| rs2403277 | NP_695023 | E | K | EK | benign            |
| rs2403768 | NP_742021 | G | E | GE | possibly damaging |
| rs2404991 | XP_371555 | G | S | GS | benign            |
| rs2405432 | NP_775933 | N | I | NI | probably damaging |
| rs2405518 | NP_003051 | F | L | FL | benign            |
| rs2405599 | XP_208213 | L | P | LP | probably damaging |
| rs2407145 | XP_372640 | F | L | FL | benign            |
| rs2407146 | XP_372640 | D | V | DV | possibly damaging |
| rs2407498 | XP_374973 | T | R | TR | probably damaging |
| rs2409074 | XP_370727 | S | F | SF | benign            |
| rs2409195 | NP_008969 | R | L | RL | probably damaging |
| rs2409496 | NP_780294 | E | Q | EQ | benign            |
| rs2410832 | NP_000204 | L | V | LV | benign            |
| rs2411459 | XP_370958 | P | L | PL | probably damaging |
| rs2411837 | NP_060618 | S | T | ST | benign            |
| rs2411936 | XP_370958 | L | F | LF | benign            |
| rs2411937 | XP_370958 | A | V | AV | benign            |
| rs2412255 | XP_372420 | G | R | GR | possibly damaging |
| rs2412257 | XP_372420 | A | T | AT | benign            |
| rs2412258 | XP_372420 | R | Q | RQ | benign            |
| rs2412504 | NP_064553 | M | V | MV | benign            |
| rs2412512 | NP_277045 | G | S | GS | benign            |
| rs2412541 | NP_733468 | A | S | AS | benign            |
| rs2412541 | NP_653091 | S | A | SA | benign            |
| rs2412946 | NP_003095 | P | L | PL | probably damaging |
| rs2412946 | XP_007651 | P | L | PL | probably damaging |
| rs2412983 | NP_002300 | S | F | SF | benign            |
| rs2414185 | XP_370865 | I | T | IT | possibly damaging |
| rs2415129 | NP_008832 | E | G | EG | possibly damaging |
| rs2416948 | NP_620050 | K | Q | KQ | benign            |
| rs2416948 | NP_110393 | K | Q | KQ | benign            |
| rs2416948 | NP_620049 | K | Q | KQ | benign            |
| rs2417534 | XP_071093 | V | M | VM | benign            |
| rs2418163 | XP_036708 | N | S | NS | benign            |



|           |           |   |   |    |                   |
|-----------|-----------|---|---|----|-------------------|
| rs2418645 | XP_057040 | D | G | DG | possibly damaging |
| rs2419103 | NP_055568 | G | D | GD | possibly damaging |
| rs2419106 | NP_055568 | R | H | RH | possibly damaging |
| rs2419108 | NP_055568 | I | V | IV | benign            |
| rs2419109 | NP_055568 | M | V | MV | possibly damaging |
| rs2420824 | XP_380121 | G | E | GE | possibly damaging |
| rs2420985 | NP_996744 | K | N | KN | benign            |
| rs2420986 | NP_996744 | M | R | MR | benign            |
| rs2421013 | NP_653188 | R | Q | RQ | benign            |
| rs2421174 | XP_370580 | G | V | GV | benign            |
| rs2422000 | XP_371496 | E | K | EK | benign            |
| rs2422490 | NP_004575 | L | Q | LQ | benign            |
| rs2422666 | NP_542970 | V | L | VL | benign            |
| rs2422857 | NP_068598 | I | T | IT | benign            |
| rs2422864 | XP_045421 | R | G | RG | benign            |
| rs2424943 | NP_872325 | G | W | GW | possibly damaging |
| rs2425015 | XP_371398 | K | E | KE | benign            |
| rs2425049 | NP_848563 | R | Q | RQ | benign            |
| rs2426631 | XP_371402 | S | P | SP | possibly damaging |
| rs2427282 | NP_005551 | R | H | RH | possibly damaging |
| rs2427283 | NP_005551 | V | M | VM | benign            |
| rs2427284 | NP_005551 | F | S | FS | possibly damaging |
| rs2427286 | NP_005551 | K | E | KE | benign            |
| rs2429292 | XP_371809 | A | V | AV | benign            |
| rs2429294 | XP_371809 | A | V | AV | benign            |
| rs2429387 | NP_006030 | H | R | HR | possibly damaging |
| rs2429467 | NP_060488 | G | R | GR | benign            |
| rs2429485 | XP_370541 | D | G | DG | benign            |
| rs2429591 | XP_290401 | A | P | AP | possibly damaging |
| rs2429594 | XP_290401 | L | M | LM | benign            |
| rs2429594 | XP_496895 | M | L | ML | benign            |
| rs2429878 | XP_495908 | N | D | ND | benign            |
| rs2431081 | NP_861441 | I | M | IM | benign            |
| rs2431189 | NP_060701 | I | T | IT | possibly damaging |
| rs2431352 | NP_006624 | E | D | ED | benign            |
| rs2431363 | NP_006624 | V | I | VI | benign            |
| rs2431999 | NP_940894 | K | N | KN | benign            |
| rs2432290 | NP_060460 | P | S | PS | benign            |
| rs2432290 | XP_208908 | S | P | SP | benign            |
| rs2432306 | XP_208908 | A | T | AT | benign            |
| rs2432306 | NP_060460 | T | A | TA | benign            |
| rs2432318 | XP_372632 | D | A | DA | benign            |
| rs2432359 | XP_496159 | R | W | RW | probably damaging |
| rs2432404 | NP_000287 | R | Q | RQ | benign            |
| rs2432405 | NP_000287 | T | M | TM | benign            |
| rs2432990 | XP_495908 | N | D | ND | benign            |

|           |           |   |   |    |                   |
|-----------|-----------|---|---|----|-------------------|
| rs2432992 | XP_495908 | R | T | RT | benign            |
| rs2432993 | XP_495908 | A | V | AV | benign            |
| rs2433031 | NP_065705 | Q | H | QH | benign            |
| rs2433331 | XP_372046 | W | R | WR | benign            |
| rs2433708 | XP_496581 | R | Q | RQ | benign            |
| rs2434470 | NP_631917 | D | E | DE | benign            |
| rs2434881 | XP_496150 | H | R | HR | benign            |
| rs2434881 | XP_496152 | H | R | HR | benign            |
| rs2434882 | XP_496150 | H | D | HD | benign            |
| rs2434882 | XP_496152 | H | D | HD | benign            |
| rs2434883 | XP_496150 | P | R | PR | probably damaging |
| rs2434883 | XP_496152 | P | R | PR | probably damaging |
| rs2434980 | NP_002308 | G | E | GE | probably damaging |
| rs2435322 | NP_619639 | L | V | LV | benign            |
| rs2435322 | NP_733842 | L | V | LV | benign            |
| rs2435381 | NP_061060 | P | S | PS | possibly damaging |
| rs2436487 | NP_064560 | G | R | GR | benign            |
| rs2436489 | NP_699190 | Q | L | QL | benign            |
| rs2437100 | NP_003293 | R | Q | RQ | benign            |
| rs2437150 | NP_114407 | L | P | LP | benign            |
| rs2437323 | NP_078953 | A | S | AS | benign            |
| rs2438586 | XP_371142 | F | L | FL | benign            |
| rs2438587 | XP_371142 | N | K | NK | benign            |
| rs2439928 | NP_849164 | G | R | GR | probably damaging |
| rs2440267 | XP_370837 | N | H | NH | benign            |
| rs2440267 | XP_370917 | N | H | NH | benign            |
| rs2441582 | NP_036316 | S | N | SN | benign            |
| rs2441583 | NP_997188 | L | M | LM | benign            |
| rs2442425 | XP_377159 | P | L | PL | probably damaging |
| rs2442426 | XP_377159 | M | T | MT | benign            |
| rs2442455 | NP_006522 | M | I | MI | benign            |
| rs2442455 | NP_783195 | M | I | MI | benign            |
| rs2442513 | NP_078872 | S | R | SR | possibly damaging |
| rs2442915 | XP_350781 | D | N | DN | benign            |
| rs2442915 | XP_495809 | N | D | ND | benign            |
| rs2444257 | NP_060621 | N | Y | NY | benign            |
| rs2444258 | NP_060621 | V | I | VI | benign            |
| rs2444263 | NP_060621 | G | S | GS | benign            |
| rs2445179 | NP_473373 | S | L | SL | possibly damaging |
| rs2445180 | NP_473373 | N | K | NK | possibly damaging |
| rs2445603 | NP_997238 | E | Q | EQ | benign            |
| rs2446056 | NP_975011 | V | I | VI | benign            |
| rs2446693 | NP_067673 | T | P | TP | possibly damaging |
| rs2446693 | NP_003465 | T | P | TP | possibly damaging |
| rs2447220 | NP_055474 | R | H | RH | possibly damaging |
| rs2447221 | NP_055474 | G | A | GA | benign            |

|           |           |   |   |    |                   |
|-----------|-----------|---|---|----|-------------------|
| rs2447437 | NP_741996 | V | L | VL | benign            |
| rs2447571 | NP_000686 | G | S | GS | benign            |
| rs2447703 | NP_031359 | E | K | EK | benign            |
| rs2447883 | XP_496323 | E | V | EV | probably damaging |
| rs2448010 | NP_060960 | G | S | GS | benign            |
| rs2448628 | XP_372092 | A | V | AV | benign            |
| rs2448628 | XP_497031 | A | V | AV | benign            |
| rs2449134 | XP_291859 | S | N | SN | probably damaging |
| rs2449148 | XP_372390 | Y | C | YC | probably damaging |
| rs2449331 | NP_005766 | T | I | TI | benign            |
| rs2450267 | NP_110436 | E | K | EK | benign            |
| rs2452505 | NP_115815 | L | V | LV | benign            |
| rs2452524 | XP_370863 | H | N | HN | benign            |
| rs2452600 | NP_006448 | S | F | SF | benign            |
| rs2452755 | XP_371758 | K | E | KE | benign            |
| rs2452756 | XP_371758 | A | T | AT | benign            |
| rs2453228 | NP_997222 | Q | E | QE | benign            |
| rs2454206 | XP_042301 | I | V | IV | benign            |
| rs2454726 | NP_006009 | R | H | RH | possibly damaging |
| rs2454727 | NP_006009 | M | I | MI | possibly damaging |
| rs2455230 | NP_006624 | F | L | FL | benign            |
| rs2455994 | XP_378185 | R | H | RH | benign            |
| rs2456022 | XP_166869 | T | P | TP | benign            |
| rs2456385 | XP_375344 | L | F | LF | benign            |
| rs2456607 | XP_290342 | D | N | DN | benign            |
| rs2456610 | XP_290342 | H | R | HR | benign            |
| rs2456611 | XP_290342 | I | T | IT | benign            |
| rs2456613 | XP_290342 | P | L | PL | possibly damaging |
| rs2456647 | XP_370968 | R | H | RH | possibly damaging |
| rs2456648 | XP_370968 | A | D | AD | benign            |
| rs2458236 | NP_787954 | L | F | LF | benign            |
| rs2458502 | XP_496917 | T | A | TA | benign            |
| rs2458860 | NP_997238 | C | W | CW | benign            |
| rs2458862 | NP_997238 | N | D | ND | benign            |
| rs2459568 | NP_057655 | N | Y | NY | possibly damaging |
| rs2459647 | XP_497879 | V | A | VA | benign            |
| rs2460018 | XP_372632 | I | V | IV | benign            |
| rs2460678 | XP_496769 | V | A | VA | benign            |
| rs2460827 | NP_006503 | Y | C | YC | benign            |
| rs2460865 | NP_078898 | L | F | LF | benign            |
| rs2460866 | NP_078898 | R | K | RK | benign            |
| rs2460946 | NP_852118 | S | F | SF | possibly damaging |
| rs2461280 | NP_624302 | V | A | VA | benign            |
| rs2461355 | XP_496239 | I | T | IT | benign            |
| rs2461356 | XP_496239 | H | R | HR | benign            |
| rs2462034 | XP_007651 | Q | R | QR | benign            |

|           |           |   |   |    |                   |
|-----------|-----------|---|---|----|-------------------|
| rs2462312 | NP_065943 | A | T | AT | benign            |
| rs2462684 | XP_496869 | S | W | SW | possibly damaging |
| rs2462961 | NP_061889 | K | E | KE | benign            |
| rs2463042 | NP_975011 | V | E | VE | benign            |
| rs2463043 | NP_975011 | T | K | TK | benign            |
| rs2463274 | NP_742017 | K | N | KN | benign            |
| rs2463274 | XP_496895 | N | K | NK | benign            |
| rs2463275 | XP_496895 | M | T | MT | benign            |
| rs2463447 | NP_689896 | R | Q | RQ | benign            |
| rs2463899 | NP_620155 | V | E | VE | benign            |
| rs2463982 | XP_496959 | L | P | LP | possibly damaging |
| rs2463982 | XP_496966 | L | P | LP | possibly damaging |
| rs2464196 | NP_000536 | S | N | SN | benign            |
| rs2464726 | NP_620155 | N | S | NS | benign            |
| rs2464896 | XP_496323 | K | E | KE | benign            |
| rs2465811 | NP_002828 | G | S | GS | benign            |
| rs2466517 | NP_631916 | A | T | AT | benign            |
| rs2466612 | XP_370662 | V | I | VI | benign            |
| rs2466613 | XP_370662 | G | R | GR | benign            |
| rs2466614 | XP_370662 | I | V | IV | benign            |
| rs2466615 | XP_370662 | I | L | IL | benign            |
| rs2466773 | XP_045581 | T | A | TA | benign            |
| rs2467642 | NP_004769 | A | V | AV | benign            |
| rs2467827 | NP_054799 | G | R | GR | benign            |
| rs2468774 | NP_473373 | F | L | FL | benign            |
| rs2468844 | NP_110381 | H | R | HR | benign            |
| rs2469791 | NP_036484 | R | C | RC | benign            |
| rs2469826 | NP_853515 | T | S | TS | benign            |
| rs2469887 | NP_060340 | A | V | AV | benign            |
| rs2469887 | NP_821174 | A | V | AV | benign            |
| rs2470103 | NP_057216 | R | Q | RQ | benign            |
| rs2470449 | NP_689853 | S | T | ST | benign            |
| rs2471952 | NP_002776 | V | I | VI | benign            |
| rs2472082 | NP_004736 | S | R | SR | possibly damaging |
| rs2472205 | NP_004306 | D | E | DE | benign            |
| rs2472205 | NP_808592 | D | E | DE | benign            |
| rs2472458 | NP_005493 | D | N | DN | possibly damaging |
| rs2472553 | NP_000733 | T | I | TI | benign            |
| rs2472617 | NP_060960 | S | N | SN | benign            |
| rs2472618 | NP_060960 | R | L | RL | benign            |
| rs2472647 | NP_114382 | V | I | VI | benign            |
| rs2472647 | NP_061735 | V | I | VI | benign            |
| rs2473928 | NP_665803 | T | A | TA | benign            |
| rs2474085 | XP_375931 | R | L | RL | benign            |
| rs2474297 | NP_997280 | R | G | RG | possibly damaging |
| rs2474329 | XP_290462 | R | C | RC | possibly damaging |

|           |           |   |   |    |                   |
|-----------|-----------|---|---|----|-------------------|
| rs2475298 | NP_009121 | K | E | KE | benign            |
| rs2476001 | XP_498321 | R | Q | RQ | benign            |
| rs2476601 | NP_036543 | R | W | RW | probably damaging |
| rs2476601 | NP_057051 | W | R | WR | probably damaging |
| rs2477120 | NP_055625 | Q | E | QE | benign            |
| rs2477599 | NP_063944 | V | D | VD | probably damaging |
| rs2478568 | NP_689938 | V | I | VI | benign            |
| rs2478703 | XP_495840 | L | P | LP | benign            |
| rs2478703 | XP_495842 | L | P | LP | benign            |
| rs2479279 | XP_497069 | R | S | RS | benign            |
| rs2479279 | XP_030729 | S | R | SR | benign            |
| rs2479280 | XP_497069 | T | A | TA | benign            |
| rs2479282 | XP_497069 | G | R | GR | benign            |
| rs2479282 | XP_030729 | R | G | RG | possibly damaging |
| rs2479288 | XP_497069 | R | Q | RQ | benign            |
| rs2479295 | XP_030729 | I | M | IM | benign            |
| rs2479295 | XP_497069 | M | I | MI | benign            |
| rs2479383 | NP_002787 | I | T | IT | benign            |
| rs2479580 | XP_030729 | A | S | AS | benign            |
| rs2480146 | NP_068800 | I | V | IV | benign            |
| rs2480345 | NP_065803 | G | A | GA | benign            |
| rs2480373 | NP_000712 | R | Q | RQ | benign            |
| rs2480452 | NP_066954 | S | L | SL | benign            |
| rs2480452 | NP_821067 | S | L | SL | benign            |
| rs2480452 | NP_821068 | S | L | SL | benign            |
| rs2480452 | NP_821070 | S | L | SL | benign            |
| rs2480452 | NP_821069 | S | L | SL | benign            |
| rs2480912 | XP_372092 | R | W | RW | probably damaging |
| rs2480912 | XP_497031 | W | R | WR | probably damaging |
| rs2480920 | NP_001798 | A | T | AT | benign            |
| rs2480921 | NP_001798 | K | E | KE | possibly damaging |
| rs2481101 | XP_034717 | E | G | EG | possibly damaging |
| rs2482146 | NP_958861 | I | V | IV | benign            |
| rs2482269 | NP_954586 | L | S | LS | benign            |
| rs2482270 | NP_954586 | D | A | DA | probably damaging |
| rs2482271 | NP_954586 | V | A | VA | benign            |
| rs2482272 | NP_954586 | L | P | LP | benign            |
| rs2482273 | NP_954586 | K | Q | KQ | benign            |
| rs2482273 | NP_954714 | K | Q | KQ | benign            |
| rs2482275 | NP_954586 | H | R | HR | benign            |
| rs2482275 | NP_954714 | H | R | HR | benign            |
| rs2482277 | NP_954586 | E | A | EA | possibly damaging |
| rs2482302 | NP_115925 | G | R | GR | probably damaging |
| rs2482437 | NP_005493 | E | K | EK | benign            |
| rs2482538 | XP_498307 | N | S | NS | benign            |
| rs2482539 | XP_498307 | F | I | FI | benign            |

|           |           |   |   |    |                   |
|-----------|-----------|---|---|----|-------------------|
| rs2483689 | NP_078779 | P | A | PA | possibly damaging |
| rs2484180 | XP_370541 | C | G | CG | probably damaging |
| rs2484842 | NP_852660 | V | A | VA | benign            |
| rs2484842 | NP_114118 | V | A | VA | benign            |
| rs2484844 | NP_852660 | E | K | EK | benign            |
| rs2484844 | NP_114118 | E | K | EK | benign            |
| rs2485319 | NP_002548 | T | M | TM | benign            |
| rs2486188 | NP_006465 | G | A | GA | benign            |
| rs2486188 | NP_938203 | G | A | GA | benign            |
| rs2486668 | NP_067003 | D | E | DE | benign            |
| rs2486668 | NP_937816 | D | E | DE | benign            |
| rs2486713 | XP_496341 | L | M | LM | benign            |
| rs2486714 | XP_496341 | R | K | RK | benign            |
| rs2486717 | XP_496341 | T | K | TK | benign            |
| rs2487068 | NP_060814 | V | I | VI | benign            |
| rs2487184 | XP_371111 | R | C | RC | possibly damaging |
| rs2487999 | NP_079204 | A | T | AT | benign            |
| rs2488269 | NP_839943 | G | R | GR | probably damaging |
| rs2488535 | XP_291625 | R | Q | RQ | benign            |
| rs2488535 | XP_291638 | R | Q | RQ | benign            |
| rs2488601 | NP_775960 | A | T | AT | benign            |
| rs2488602 | NP_775960 | A | V | AV | benign            |
| rs2490899 | XP_350781 | L | S | LS | benign            |
| rs2490899 | XP_290482 | S | L | SL | benign            |
| rs2491014 | NP_775965 | W | C | WC | benign            |
| rs2491079 | NP_004406 | G | R | GR | possibly damaging |
| rs2491080 | NP_004406 | K | N | KN | benign            |
| rs2491097 | NP_055240 | S | L | SL | possibly damaging |
| rs2491097 | NP_899068 | S | L | SL | possibly damaging |
| rs2491132 | XP_375712 | V | I | VI | benign            |
| rs2491538 | XP_372094 | P | R | PR | probably damaging |
| rs2491581 | XP_498326 | Q | K | QK | possibly damaging |
| rs2491581 | XP_498328 | Q | K | QK | possibly damaging |
| rs2492215 | NP_997188 | P | L | PL | benign            |
| rs2492216 | NP_997188 | G | D | GD | possibly damaging |
| rs2492217 | NP_997188 | S | Y | SY | benign            |
| rs2493292 | NP_071397 | P | L | PL | benign            |
| rs2493292 | NP_955533 | P | L | PL | benign            |
| rs2493483 | NP_958861 | T | A | TA | benign            |
| rs2493702 | XP_497240 | Q | R | QR | benign            |
| rs2493702 | XP_497242 | R | Q | RQ | benign            |
| rs2494620 | NP_060686 | Q | R | QR | benign            |
| rs2494876 | NP_068771 | S | P | SP | benign            |
| rs2495583 | XP_497231 | M | V | MV | possibly damaging |
| rs2496423 | XP_292193 | S | P | SP | probably damaging |
| rs2496424 | XP_292193 | M | K | MK | probably damaging |

|           |           |   |   |    |                   |
|-----------|-----------|---|---|----|-------------------|
| rs2496425 | XP_292193 | F | S | FS | possibly damaging |
| rs2497218 | NP_954863 | V | I | VI | benign            |
| rs2497218 | NP_570141 | V | I | VI | benign            |
| rs2498170 | NP_700359 | D | E | DE | benign            |
| rs2498170 | NP_009061 | D | E | DE | benign            |
| rs2498323 | NP_001519 | R | Q | RQ | benign            |
| rs2498478 | XP_373372 | R | H | RH | benign            |
| rs2498982 | NP_005790 | V | L | VL | benign            |
| rs2498982 | NP_795352 | V | L | VL | benign            |
| rs2498982 | NP_795353 | V | L | VL | benign            |
| rs2499481 | NP_733842 | W | S | WS | benign            |
| rs2499481 | NP_619639 | W | S | WS | probably damaging |
| rs2499836 | NP_056256 | W | R | WR | possibly damaging |
| rs2500016 | XP_061611 | T | A | TA | possibly damaging |
| rs2500017 | XP_061611 | V | I | VI | benign            |
| rs2500018 | XP_061611 | Q | L | QL | benign            |
| rs2500052 | XP_061610 | R | C | RC | benign            |
| rs2501176 | XP_027658 | Q | R | QR | benign            |
| rs2501432 | NP_001832 | Q | R | QR | benign            |
| rs2501968 | NP_060602 | D | G | DG | benign            |
| rs2502601 | NP_003889 | E | G | EG | possibly damaging |
| rs2503480 | XP_372092 | R | H | RH | benign            |
| rs2503480 | XP_497031 | R | H | RH | possibly damaging |
| rs2504011 | NP_078964 | M | T | MT | benign            |
| rs2504376 | XP_371848 | W | S | WS | possibly damaging |
| rs2504779 | NP_997280 | M | V | MV | benign            |
| rs2505327 | XP_370541 | M | T | MT | benign            |
| rs2507164 | NP_000709 | E | K | EK | benign            |
| rs2508018 | XP_371809 | A | T | AT | benign            |
| rs2508168 | NP_955377 | R | L | RL | possibly damaging |
| rs2508437 | NP_116190 | Q | P | QP | possibly damaging |
| rs2508489 | NP_848602 | H | R | HR | possibly damaging |
| rs2508490 | NP_848602 | R | H | RH | possibly damaging |
| rs2509010 | NP_071405 | D | N | DN | benign            |
| rs2509062 | NP_775852 | M | V | MV | benign            |
| rs2509649 | NP_001214 | G | E | GE | benign            |
| rs2509649 | NP_150634 | G | E | GE | benign            |
| rs2510433 | XP_208543 | F | V | FV | possibly damaging |
| rs2511241 | NP_002555 | P | L | PL | possibly damaging |
| rs2511241 | NP_788085 | P | L | PL | possibly damaging |
| rs2511241 | NP_788086 | P | L | PL | possibly damaging |
| rs2511403 | XP_291947 | A | T | AT | benign            |
| rs2511950 | XP_496769 | Q | H | QH | probably damaging |
| rs2511951 | XP_496769 | L | S | LS | possibly damaging |
| rs2512166 | XP_166767 | T | A | TA | probably damaging |
| rs2512167 | XP_166767 | G | E | GE | possibly damaging |

|           |           |   |   |    |                   |
|-----------|-----------|---|---|----|-------------------|
| rs2512168 | XP_166767 | C | Y | CY | benign            |
| rs2512219 | XP_208541 | R | H | RH | benign            |
| rs2512268 | XP_370662 | I | T | IT | benign            |
| rs2512938 | XP_166813 | F | S | FS | possibly damaging |
| rs2512961 | XP_372390 | H | Y | HY | benign            |
| rs2513718 | XP_166914 | R | W | RW | possibly damaging |
| rs2513726 | XP_166910 | Y | C | YC | probably damaging |
| rs2515569 | NP_078872 | G | D | GD | benign            |
| rs2515848 | NP_705611 | K | R | KR | benign            |
| rs2515926 | NP_002462 | P | Q | PQ | benign            |
| rs2515960 | XP_035572 | L | S | LS | benign            |
| rs2516542 | NP_659479 | N | D | ND | benign            |
| rs2516690 | NP_079115 | Q | H | QH | benign            |
| rs2516700 | XP_496802 | C | Y | CY | probably damaging |
| rs2516707 | XP_496802 | I | V | IV | benign            |
| rs2516709 | XP_496802 | H | R | HR | benign            |
| rs2517560 | XP_376479 | E | K | EK | benign            |
| rs2517630 | NP_439893 | G | E | GE | benign            |
| rs2517630 | NP_006769 | G | E | GE | benign            |
| rs2517963 | NP_031361 | G | R | GR | possibly damaging |
| rs2517963 | NP_031363 | G | R | GR | possibly damaging |
| rs2517963 | NP_031364 | G | R | GR | possibly damaging |
| rs2517963 | NP_031362 | G | R | GR | possibly damaging |
| rs2518042 | NP_995317 | K | E | KE | possibly damaging |
| rs2518043 | NP_995317 | K | E | KE | possibly damaging |
| rs2518684 | NP_055585 | G | A | GA | benign            |
| rs2518691 | NP_612405 | N | D | ND | benign            |
| rs2519170 | NP_005960 | V | A | VA | benign            |
| rs2519261 | NP_000287 | G | V | GV | probably damaging |
| rs2519337 | XP_370968 | L | P | LP | benign            |
| rs2519338 | XP_370968 | T | A | TA | benign            |
| rs2519540 | NP_848594 | T | A | TA | benign            |
| rs2520619 | XP_496486 | L | V | LV | benign            |
| rs2521574 | NP_004644 | R | K | RK | benign            |
| rs2521853 | XP_496237 | M | T | MT | benign            |
| rs2521854 | XP_496237 | N | D | ND | benign            |
| rs2521860 | XP_496237 | Q | R | QR | benign            |
| rs2521869 | XP_496237 | S | R | SR | benign            |
| rs2521988 | NP_981959 | E | K | EK | benign            |
| rs2521988 | NP_981960 | E | K | EK | benign            |
| rs2521988 | NP_056177 | E | K | EK | benign            |
| rs2521988 | NP_981958 | E | K | EK | benign            |
| rs2521998 | NP_005004 | N | S | NS | benign            |
| rs2522018 | NP_000209 | P | H | PH | probably damaging |
| rs2522019 | NP_000209 | A | V | AV | benign            |
| rs2522833 | XP_168530 | S | A | SA | benign            |



|           |           |   |   |    |                   |
|-----------|-----------|---|---|----|-------------------|
| rs2522943 | NP_115797 | P | R | PR | probably damaging |
| rs2522943 | NP_003379 | R | P | RP | probably damaging |
| rs2522969 | NP_001479 | I | M | IM | benign            |
| rs2523072 | NP_620166 | T | S | TS | benign            |
| rs2523307 | XP_371923 | N | K | NK | benign            |
| rs2523349 | XP_371925 | M | T | MT | benign            |
| rs2523349 | NP_775808 | M | T | MT | benign            |
| rs2523352 | XP_371925 | Y | F | YF | benign            |
| rs2523352 | NP_775808 | Y | F | YF | benign            |
| rs2523353 | NP_775808 | R | C | RC | possibly damaging |
| rs2523370 | XP_372677 | R | S | RS | possibly damaging |
| rs2523371 | NP_078888 | P | A | PA | benign            |
| rs2523376 | XP_372677 | I | T | IT | benign            |
| rs2523376 | NP_078888 | T | I | TI | benign            |
| rs2523600 | NP_005505 | E | K | EK | benign            |
| rs2523602 | NP_005505 | D | E | DE | benign            |
| rs2523603 | NP_005505 | E | Q | EQ | benign            |
| rs2523732 | NP_150232 | P | S | PS | possibly damaging |
| rs2523956 | NP_002107 | A | S | AS | benign            |
| rs2523989 | NP_008959 | V | I | VI | benign            |
| rs2523989 | NP_438111 | V | I | VI | benign            |
| rs2524235 | NP_001945 | L | V | LV | benign            |
| rs2524383 | NP_038475 | L | F | LF | benign            |
| rs2524383 | NP_690880 | L | F | LF | benign            |
| rs2524383 | NP_690881 | L | F | LF | benign            |
| rs2524383 | NP_690882 | L | F | LF | benign            |
| rs2524383 | NP_690883 | L | F | LF | benign            |
| rs2524383 | NP_690884 | L | F | LF | benign            |
| rs2524383 | NP_690885 | L | F | LF | benign            |
| rs2524441 | NP_116751 | M | I | MI | benign            |
| rs2524441 | NP_116750 | M | I | MI | benign            |
| rs2524441 | NP_116749 | M | I | MI | possibly damaging |
| rs2524441 | NP_055337 | M | I | MI | possibly damaging |
| rs2525025 | NP_005128 | S | F | SF | benign            |
| rs2525702 | XP_069612 | G | S | GS | benign            |
| rs2525862 | XP_093087 | R | Q | RQ | benign            |
| rs2525982 | NP_004658 | R | P | RP | possibly damaging |
| rs2525988 | NP_004658 | Q | P | QP | possibly damaging |
| rs2526247 | NP_054750 | L | V | LV | benign            |
| rs2526374 | NP_060233 | M | L | ML | benign            |
| rs2527357 | NP_775808 | E | K | EK | benign            |
| rs2528303 | NP_775836 | L | V | LV | benign            |
| rs2528348 | NP_932765 | L | V | LV | benign            |
| rs2528353 | NP_775836 | M | T | MT | benign            |
| rs2529320 | NP_775808 | L | S | LS | benign            |
| rs2529320 | XP_371925 | S | L | SL | benign            |

|           |           |   |   |    |                   |
|-----------|-----------|---|---|----|-------------------|
| rs2529321 | NP_775808 | M | T | MT | benign            |
| rs2529321 | XP_371925 | T | M | TM | benign            |
| rs2529541 | NP_002355 | K | E | KE | benign            |
| rs2529567 | NP_803134 | A | G | AG | benign            |
| rs2529568 | NP_803134 | G | S | GS | benign            |
| rs2529980 | XP_170842 | R | H | RH | benign            |
| rs2529980 | NP_848666 | R | H | RH | benign            |
| rs2530066 | NP_065703 | N | S | NS | benign            |
| rs2530068 | NP_065703 | S | R | SR | benign            |
| rs2530069 | NP_065703 | K | E | KE | benign            |
| rs2530070 | NP_065703 | N | K | NK | benign            |
| rs2530071 | NP_065703 | M | V | MV | benign            |
| rs2530208 | NP_115778 | R | P | RP | benign            |
| rs2530208 | NP_002579 | R | P | RP | possibly damaging |
| rs2530245 | NP_060176 | R | C | RC | probably damaging |
| rs2530301 | XP_373214 | T | A | TA | benign            |
| rs2530487 | XP_496900 | A | T | AT | benign            |
| rs2530522 | XP_290401 | A | T | AT | benign            |
| rs2530522 | NP_742017 | A | T | AT | benign            |
| rs2530524 | XP_496895 | G | S | GS | benign            |
| rs2530524 | NP_742017 | S | G | SG | possibly damaging |
| rs2530609 | NP_065943 | G | D | GD | possibly damaging |
| rs2530814 | NP_997206 | W | R | WR | possibly damaging |
| rs2531902 | XP_372677 | S | N | SN | benign            |
| rs2531913 | NP_078888 | I | T | IT | benign            |
| rs2531913 | XP_372677 | T | I | TI | possibly damaging |
| rs2532500 | NP_060479 | A | T | AT | benign            |
| rs2532501 | NP_060479 | V | M | VM | benign            |
| rs2532502 | NP_001233 | R | H | RH | benign            |
| rs2533485 | XP_290401 | P | L | PL | probably damaging |
| rs2535241 | XP_294093 | D | V | DV | possibly damaging |
| rs2535242 | XP_294093 | A | G | AG | benign            |
| rs2535621 | NP_002209 | L | P | LP | benign            |
| rs2535649 | NP_127503 | S | N | SN | benign            |
| rs2536512 | NP_003093 | T | A | TA | benign            |
| rs2536755 | XP_495908 | P | L | PL | benign            |
| rs2536756 | XP_495908 | G | R | GR | benign            |
| rs2536815 | XP_495917 | T | P | TP | benign            |
| rs2536839 | XP_495917 | F | Y | FY | benign            |
| rs2536855 | XP_495909 | Q | K | QK | benign            |
| rs2536864 | XP_495909 | L | W | LW | benign            |
| rs2536865 | XP_495909 | H | N | HN | benign            |
| rs2536886 | XP_495909 | E | K | EK | benign            |
| rs2536886 | XP_495917 | K | E | KE | benign            |
| rs2536903 | XP_495909 | E | D | ED | benign            |
| rs2536912 | XP_495917 | W | R | WR | benign            |

|           |           |   |   |    |                   |
|-----------|-----------|---|---|----|-------------------|
| rs2537817 | NP_076407 | M | V | MV | benign            |
| rs2539908 | NP_477352 | V | L | VL | benign            |
| rs2542134 | XP_036729 | Y | C | YC | benign            |
| rs2542135 | XP_036729 | W | R | WR | benign            |
| rs2542780 | NP_060046 | E | K | EK | benign            |
| rs2543167 | XP_495917 | I | V | IV | benign            |
| rs2543167 | XP_495909 | V | I | VI | benign            |
| rs2543171 | XP_495909 | R | H | RH | benign            |
| rs2543325 | XP_495917 | N | T | NT | benign            |
| rs2543427 | NP_775774 | T | I | TI | benign            |
| rs2544600 | NP_055548 | T | I | TI | benign            |
| rs2544773 | NP_060813 | S | C | SC | possibly damaging |
| rs2544809 | NP_543157 | I | V | IV | benign            |
| rs2544809 | NP_004386 | I | V | IV | benign            |
| rs2545754 | NP_085079 | A | G | AG | benign            |
| rs2545754 | NP_000755 | A | G | AG | benign            |
| rs2545783 | NP_000753 | A | P | AP | benign            |
| rs2546423 | NP_996763 | H | R | HR | benign            |
| rs2547556 | NP_115778 | S | G | SG | benign            |
| rs2547556 | NP_002579 | S | G | SG | possibly damaging |
| rs2549086 | XP_208908 | H | Y | HY | benign            |
| rs2549087 | XP_208908 | Q | H | QH | possibly damaging |
| rs2549089 | NP_872425 | T | I | TI | benign            |
| rs2549097 | NP_872425 | A | V | AV | benign            |
| rs2549233 | XP_373693 | A | E | AE | benign            |
| rs2549261 | XP_208908 | H | R | HR | possibly damaging |
| rs2549273 | XP_208908 | R | Q | RQ | benign            |
| rs2549280 | XP_208908 | Q | L | QL | benign            |
| rs2549281 | XP_208908 | V | I | VI | benign            |
| rs2549468 | XP_496159 | A | V | AV | benign            |
| rs2549472 | XP_370968 | P | L | PL | benign            |
| rs2549472 | XP_496159 | L | P | LP | probably damaging |
| rs2549473 | XP_370968 | R | W | RW | benign            |
| rs2549473 | XP_496159 | W | R | WR | possibly damaging |
| rs2549474 | XP_370968 | D | G | DG | benign            |
| rs2549474 | XP_496159 | G | D | GD | possibly damaging |
| rs2549476 | XP_496159 | S | R | SR | benign            |
| rs2549486 | XP_496159 | K | E | KE | benign            |
| rs2549532 | NP_060460 | Y | H | YH | possibly damaging |
| rs2549566 | XP_208908 | E | K | EK | benign            |
| rs2549566 | NP_060460 | K | E | KE | benign            |
| rs2549598 | XP_378608 | Q | R | QR | benign            |
| rs2549675 | NP_000287 | V | L | VL | benign            |
| rs2549676 | NP_000287 | G | A | GA | benign            |
| rs2549677 | NP_000287 | M | T | MT | possibly damaging |
| rs2549782 | NP_071745 | K | N | KN | benign            |

|           |           |   |   |    |                   |
|-----------|-----------|---|---|----|-------------------|
| rs2549949 | XP_496139 | T | M | TM | probably damaging |
| rs2549955 | XP_496139 | R | Q | RQ | benign            |
| rs2550056 | NP_115564 | L | R | LR | possibly damaging |
| rs2550232 | NP_689886 | I | T | IT | benign            |
| rs2550240 | NP_004523 | K | N | KN | benign            |
| rs2550240 | NP_612154 | K | N | KN | benign            |
| rs2550401 | XP_370931 | N | S | NS | benign            |
| rs2550908 | NP_067628 | A | T | AT | benign            |
| rs2550908 | NP_036258 | T | A | TA | benign            |
| rs2550908 | NP_078809 | T | A | TA | benign            |
| rs2551429 | NP_065104 | S | F | SF | benign            |
| rs2551949 | NP_660323 | I | T | IT | possibly damaging |
| rs2553131 | XP_495908 | Q | K | QK | benign            |
| rs2553132 | XP_495908 | G | R | GR | benign            |
| rs2553933 | NP_001922 | K | Q | KQ | benign            |
| rs2554801 | NP_851421 | A | V | AV | benign            |
| rs2554801 | NP_851422 | A | V | AV | benign            |
| rs2554801 | NP_055818 | A | V | AV | benign            |
| rs2554801 | XP_496064 | A | V | AV | benign            |
| rs2554802 | NP_851421 | A | V | AV | benign            |
| rs2554802 | NP_851422 | A | V | AV | benign            |
| rs2554802 | NP_055818 | A | V | AV | benign            |
| rs2554802 | XP_496064 | A | V | AV | benign            |
| rs2554934 | NP_003132 | E | K | EK | benign            |
| rs2555152 | NP_775860 | D | N | DN | benign            |
| rs2555158 | NP_775860 | E | V | EV | benign            |
| rs2556256 | XP_496581 | R | S | RS | benign            |
| rs2556257 | XP_496581 | T | P | TP | benign            |
| rs2556281 | XP_496581 | K | N | KN | benign            |
| rs2556287 | XP_496581 | G | D | GD | possibly damaging |
| rs2556288 | XP_496581 | V | I | VI | benign            |
| rs2556481 | NP_004671 | I | M | IM | benign            |
| rs2556481 | NP_733841 | I | M | IM | benign            |
| rs2556894 | NP_116755 | P | R | PR | benign            |
| rs2556895 | NP_116755 | V | A | VA | benign            |
| rs2556896 | NP_116755 | G | A | GA | benign            |
| rs2556897 | NP_116755 | S | P | SP | possibly damaging |
| rs2556898 | NP_116755 | N | D | ND | benign            |
| rs2556901 | NP_116755 | T | A | TA | benign            |
| rs2557901 | XP_496581 | C | Y | CY | probably damaging |
| rs2560049 | NP_061161 | R | T | RT | benign            |
| rs2560201 | NP_940969 | S | P | SP | benign            |
| rs2560203 | NP_940969 | Q | R | QR | benign            |
| rs2560306 | NP_997200 | R | H | RH | benign            |
| rs2561111 | NP_689616 | R | H | RH | benign            |
| rs2561818 | NP_689616 | V | M | VM | benign            |

|           |           |   |   |    |                   |
|-----------|-----------|---|---|----|-------------------|
| rs2561818 | NP_877951 | V | M | VM | benign            |
| rs2561818 | NP_877950 | V | M | VM | benign            |
| rs2562741 | NP_060866 | I | V | IV | benign            |
| rs2564611 | NP_000737 | A | D | AD | possibly damaging |
| rs2565312 | XP_497188 | W | R | WR | probably damaging |
| rs2567241 | NP_004353 | A | S | AS | benign            |
| rs2567608 | NP_001043 | S | F | SF | possibly damaging |
| rs2568076 | NP_065694 | P | L | PL | probably damaging |
| rs2569490 | NP_071329 | R | H | RH | benign            |
| rs2569491 | NP_071329 | H | Y | HY | benign            |
| rs2569527 | NP_004908 | Q | H | QH | possibly damaging |
| rs2569548 | NP_000518 | P | S | PS | probably damaging |
| rs2569706 | NP_003250 | G | R | GR | probably damaging |
| rs2570571 | XP_377159 | E | Q | EQ | benign            |
| rs2570573 | XP_377159 | K | N | KN | possibly damaging |
| rs2570865 | XP_290660 | D | G | DG | possibly damaging |
| rs2570866 | XP_290660 | K | E | KE | benign            |
| rs2571089 | NP_689567 | S | N | SN | benign            |
| rs2571445 | NP_072174 | W | R | WR | probably damaging |
| rs2571660 | NP_116755 | N | T | NT | benign            |
| rs2571660 | NP_116754 | N | T | NT | benign            |
| rs2571660 | NP_116753 | N | T | NT | benign            |
| rs2571795 | NP_116755 | T | A | TA | benign            |
| rs2571795 | NP_116754 | T | A | TA | benign            |
| rs2571795 | NP_116753 | T | A | TA | benign            |
| rs2571796 | NP_116755 | N | D | ND | benign            |
| rs2571796 | NP_116754 | N | D | ND | benign            |
| rs2571796 | NP_116753 | N | D | ND | benign            |
| rs2572073 | NP_775901 | E | K | EK | benign            |
| rs2572423 | XP_498272 | G | S | GS | possibly damaging |
| rs2573652 | NP_620688 | S | N | SN | benign            |
| rs2575314 | NP_000287 | V | M | VM | benign            |
| rs2575315 | NP_000287 | A | G | AG | benign            |
| rs2575317 | NP_000287 | P | L | PL | probably damaging |
| rs2576522 | XP_496197 | Q | R | QR | benign            |
| rs2577154 | NP_060530 | A | V | AV | benign            |
| rs2577301 | NP_002017 | P | T | PT | possibly damaging |
| rs2577301 | NP_997640 | P | T | PT | possibly damaging |
| rs2577301 | NP_997643 | P | T | PT | possibly damaging |
| rs2577301 | NP_997647 | P | T | PT | possibly damaging |
| rs2577301 | NP_997639 | P | T | PT | probably damaging |
| rs2577301 | NP_997641 | P | T | PT | probably damaging |
| rs2578377 | NP_061161 | S | G | SG | benign            |
| rs2578500 | XP_029101 | V | I | VI | benign            |
| rs2578652 | NP_937784 | D | E | DE | benign            |
| rs2578662 | NP_055055 | G | D | GD | possibly damaging |

|           |           |   |   |    |                   |
|-----------|-----------|---|---|----|-------------------|
| rs2579529 | XP_376101 | Y | H | YH | benign            |
| rs2580977 | XP_496581 | H | R | HR | benign            |
| rs2580980 | XP_496581 | D | G | DG | possibly damaging |
| rs2581423 | NP_006336 | A | T | AT | benign            |
| rs2581440 | XP_209607 | R | K | RK | benign            |
| rs2582513 | XP_290629 | P | L | PL | probably damaging |
| rs2582554 | XP_208766 | A | T | AT | benign            |
| rs2583641 | NP_002129 | L | P | LP | probably damaging |
| rs2583641 | NP_112737 | L | P | LP | probably damaging |
| rs2583641 | NP_112738 | L | P | LP | probably damaging |
| rs2584625 | NP_060117 | E | Q | EQ | benign            |
| rs2584879 | NP_001024 | R | Q | RQ | probably damaging |
| rs2584918 | XP_495878 | T | A | TA | benign            |
| rs2585033 | NP_003604 | L | W | LW | probably damaging |
| rs2585405 | NP_002607 | P | A | PA | possibly damaging |
| rs2585635 | NP_002459 | L | V | LV | benign            |
| rs2586012 | XP_068229 | M | V | MV | benign            |
| rs2586514 | NP_060512 | R | C | RC | probably damaging |
| rs2587070 | NP_056182 | I | T | IT | benign            |
| rs2587554 | NP_848605 | L | M | LM | benign            |
| rs2588458 | NP_005100 | K | Q | KQ | benign            |
| rs2589991 | XP_096885 | A | P | AP | possibly damaging |
| rs2589992 | XP_096885 | H | P | HP | benign            |
| rs2590120 | XP_378185 | A | T | AT | benign            |
| rs2591714 | NP_777574 | A | T | AT | benign            |
| rs2592662 | NP_038198 | K | R | KR | benign            |
| rs2592834 | NP_008924 | H | D | HD | probably damaging |
| rs2592835 | NP_008924 | E | K | EK | probably damaging |
| rs2593778 | NP_002139 | Q | E | QE | benign            |
| rs2593943 | NP_055244 | Y | H | YH | possibly damaging |
| rs2595390 | NP_002201 | I | V | IV | benign            |
| rs2595453 | NP_997069 | P | L | PL | possibly damaging |
| rs2595985 | XP_377159 | T | I | TI | probably damaging |
| rs2596139 | NP_002141 | A | P | AP | benign            |
| rs2596492 | NP_005505 | Y | H | YH | benign            |
| rs2596781 | NP_002471 | T | P | TP | possibly damaging |
| rs2597017 | XP_495809 | C | R | CR | benign            |
| rs2597017 | XP_290482 | R | C | RC | benign            |
| rs2597040 | XP_495809 | L | V | LV | benign            |
| rs2597041 | XP_495809 | F | C | FC | benign            |
| rs2597042 | XP_495809 | P | H | PH | benign            |
| rs2597044 | XP_495809 | V | A | VA | benign            |
| rs2597060 | NP_714544 | T | A | TA | benign            |
| rs2597067 | NP_714544 | R | Q | RQ | benign            |
| rs2597078 | NP_742095 | P | L | PL | probably damaging |
| rs2597078 | NP_742094 | P | L | PL | probably damaging |

|           |           |   |   |    |                   |
|-----------|-----------|---|---|----|-------------------|
| rs2597078 | NP_742093 | P | L | PL | probably damaging |
| rs2597078 | NP_473361 | P | L | PL | probably damaging |
| rs2598002 | NP_795368 | F | V | FV | benign            |
| rs2598303 | XP_496861 | G | D | GD | possibly damaging |
| rs2598806 | XP_497879 | K | E | KE | benign            |
| rs2598807 | XP_497879 | A | V | AV | benign            |
| rs2599792 | XP_496593 | T | M | TM | benign            |
| rs2599793 | XP_496593 | H | R | HR | benign            |
| rs2599794 | XP_496593 | E | D | ED | benign            |
| rs2599795 | XP_496593 | V | M | VM | benign            |
| rs2599954 | NP_997193 | Q | R | QR | benign            |
| rs2599956 | NP_997193 | A | G | AG | benign            |
| rs2599956 | NP_620125 | G | A | GA | benign            |
| rs2599962 | NP_620125 | S | P | SP | benign            |
| rs2599971 | NP_620125 | M | T | MT | benign            |
| rs2599971 | NP_997193 | T | M | TM | benign            |
| rs2599975 | XP_209429 | K | N | KN | benign            |
| rs2599975 | XP_497871 | N | K | NK | benign            |
| rs2599976 | XP_209429 | G | R | GR | benign            |
| rs2599976 | XP_497871 | R | G | RG | possibly damaging |
| rs2599980 | NP_060421 | T | I | TI | possibly damaging |
| rs2599980 | NP_060221 | T | I | TI | possibly damaging |
| rs2599982 | NP_060421 | Q | E | QE | benign            |
| rs2599982 | NP_060221 | Q | E | QE | benign            |
| rs2600701 | XP_496611 | S | T | ST | benign            |
| rs2601517 | XP_496026 | T | R | TR | benign            |
| rs2601530 | XP_375150 | H | L | HL | benign            |
| rs2602141 | NP_005648 | K | Q | KQ | benign            |
| rs2603039 | XP_290758 | H | P | HP | probably damaging |
| rs2603040 | XP_290758 | E | K | EK | benign            |
| rs2604814 | XP_497442 | G | S | GS | benign            |
| rs2604953 | NP_002269 | T | P | TP | benign            |
| rs2604955 | NP_002269 | S | N | SN | benign            |
| rs2604956 | NP_002269 | D | E | DE | benign            |
| rs2605139 | NP_002009 | W | G | WG | probably damaging |
| rs2605683 | XP_372094 | K | E | KE | benign            |
| rs2605684 | XP_372094 | H | R | HR | benign            |
| rs2605913 | NP_997238 | M | V | MV | benign            |
| rs2606921 | NP_001162 | A | V | AV | benign            |
| rs2607015 | NP_006286 | P | R | PR | benign            |
| rs2608009 | NP_005547 | A | G | AG | possibly damaging |
| rs2608498 | XP_496320 | H | Y | HY | possibly damaging |
| rs2608737 | XP_211460 | N | I | NI | possibly damaging |
| rs2608738 | XP_211460 | H | R | HR | benign            |
| rs2609383 | NP_116279 | E | K | EK | benign            |
| rs2609428 | NP_114095 | F | L | FL | benign            |

|           |           |   |   |    |                   |
|-----------|-----------|---|---|----|-------------------|
| rs2609881 | NP_037512 | E | A | EA | benign            |
| rs2610340 | NP_115727 | P | S | PS | probably damaging |
| rs2611575 | XP_370845 | D | A | DA | benign            |
| rs2611575 | XP_370849 | A | D | AD | possibly damaging |
| rs2612086 | NP_059982 | M | T | MT | benign            |
| rs2612086 | NP_974487 | M | T | MT | benign            |
| rs2612862 | NP_073153 | S | P | SP | benign            |
| rs2612906 | NP_073153 | A | P | AP | benign            |
| rs2614668 | NP_009131 | A | T | AT | benign            |
| rs2614668 | NP_658913 | A | T | AT | benign            |
| rs2614668 | NP_006729 | A | T | AT | benign            |
| rs2614797 | NP_742094 | S | L | SL | benign            |
| rs2614797 | NP_742093 | S | L | SL | possibly damaging |
| rs2614797 | NP_473361 | S | L | SL | possibly damaging |
| rs2614835 | NP_742095 | E | G | EG | benign            |
| rs2614835 | NP_742093 | E | G | EG | benign            |
| rs2614835 | NP_473361 | E | G | EG | benign            |
| rs2614835 | NP_742094 | E | G | EG | possibly damaging |
| rs2615354 | XP_372563 | G | S | GS | possibly damaging |
| rs2615354 | XP_372565 | G | S | GS | possibly damaging |
| rs2615360 | XP_496064 | L | V | LV | benign            |
| rs2615360 | NP_851421 | V | L | VL | benign            |
| rs2615360 | NP_851422 | V | L | VL | benign            |
| rs2615360 | NP_055818 | V | L | VL | benign            |
| rs2615612 | NP_741996 | F | S | FS | benign            |
| rs2617170 | NP_038459 | N | S | NS | benign            |
| rs2617604 | NP_001035 | L | F | LF | benign            |
| rs2617667 | XP_064903 | A | T | AT | benign            |
| rs2617726 | XP_371192 | E | Q | EQ | possibly damaging |
| rs2619599 | XP_371261 | G | A | GA | benign            |
| rs2619844 | XP_029101 | C | S | CS | probably damaging |
| rs2620671 | NP_665697 | G | R | GR | possibly damaging |
| rs2620672 | NP_665697 | A | V | AV | benign            |
| rs2620836 | NP_055830 | E | K | EK | benign            |
| rs2621330 | NP_002111 | V | I | VI | benign            |
| rs2624827 | NP_005769 | G | A | GA | benign            |
| rs2625962 | NP_055918 | R | H | RH | benign            |
| rs2625973 | NP_055918 | L | V | LV | benign            |
| rs2626577 | NP_003144 | E | Q | EQ | benign            |
| rs2627107 | NP_997206 | S | L | SL | benign            |
| rs2627223 | NP_006631 | V | M | VM | benign            |
| rs2627860 | XP_496236 | A | S | AS | benign            |
| rs2627860 | NP_115971 | S | A | SA | benign            |
| rs2628035 | XP_350881 | I | V | IV | benign            |
| rs2628195 | XP_496985 | I | V | IV | benign            |
| rs2629339 | XP_496496 | P | S | PS | benign            |



|           |           |   |   |    |                   |
|-----------|-----------|---|---|----|-------------------|
| rs2629568 | NP_116295 | A | P | AP | benign            |
| rs2631567 | NP_002580 | R | S | RS | benign            |
| rs2631567 | NP_115832 | R | S | RS | benign            |
| rs2631567 | NP_115833 | R | S | RS | benign            |
| rs2632398 | NP_064544 | R | C | RC | possibly damaging |
| rs2633965 | NP_149976 | Q | L | QL | possibly damaging |
| rs2634336 | XP_496692 | C | R | CR | probably damaging |
| rs2634337 | XP_496692 | L | F | LF | benign            |
| rs2634349 | XP_496692 | E | K | EK | benign            |
| rs2634351 | XP_496692 | I | V | IV | benign            |
| rs2634571 | XP_497053 | A | V | AV | benign            |
| rs2634571 | XP_497052 | V | A | VA | benign            |
| rs2634572 | XP_497052 | A | T | AT | benign            |
| rs2634973 | XP_037817 | V | I | VI | benign            |
| rs2635164 | NP_277047 | T | S | TS | benign            |
| rs2635535 | XP_497391 | T | I | TI | possibly damaging |
| rs2635718 | NP_061720 | D | H | DH | benign            |
| rs2635989 | XP_498448 | S | C | SC | benign            |
| rs2635991 | XP_498448 | W | R | WR | possibly damaging |
| rs2636318 | NP_036234 | P | R | PR | probably damaging |
| rs2636342 | NP_071403 | L | P | LP | benign            |
| rs2636839 | XP_372579 | T | N | TN | benign            |
| rs2636889 | NP_000599 | V | A | VA | benign            |
| rs2636890 | NP_000599 | M | V | MV | benign            |
| rs2636890 | NP_000598 | V | M | VM | benign            |
| rs2638290 | NP_003911 | E | Q | EQ | benign            |
| rs2638497 | NP_787028 | L | S | LS | benign            |
| rs2639001 | XP_495917 | K | E | KE | benign            |
| rs2639029 | XP_495917 | F | S | FS | benign            |
| rs2639029 | XP_495909 | S | F | SF | benign            |
| rs2639033 | XP_495909 | Q | H | QH | possibly damaging |
| rs2639039 | XP_495909 | I | L | IL | benign            |
| rs2639039 | XP_495917 | L | I | LI | benign            |
| rs2639087 | XP_495917 | N | S | NS | benign            |
| rs2639087 | XP_495909 | S | N | SN | benign            |
| rs2639092 | XP_495917 | Q | R | QR | benign            |
| rs2639142 | NP_001449 | S | N | SN | benign            |
| rs2639879 | XP_372191 | Q | R | QR | benign            |
| rs2640033 | NP_000283 | H | P | HP | probably damaging |
| rs2640038 | NP_000087 | V | G | VG | possibly damaging |
| rs2640384 | XP_496034 | L | P | LP | benign            |
| rs2640601 | NP_005972 | F | V | FV | possibly damaging |
| rs2640738 | NP_055880 | G | R | GR | possibly damaging |
| rs2640779 | NP_055880 | R | G | RG | benign            |
| rs2640785 | NP_055880 | E | V | EV | possibly damaging |
| rs2640909 | NP_058515 | M | T | MT | benign            |

|           |           |   |   |    |                   |
|-----------|-----------|---|---|----|-------------------|
| rs2641348 | NP_068566 | L | P | LP | benign            |
| rs2641563 | XP_370567 | I | V | IV | benign            |
| rs2641962 | NP_443128 | M | V | MV | benign            |
| rs2642419 | NP_073583 | M | I | MI | possibly damaging |
| rs2642438 | NP_073583 | A | T | AT | benign            |
| rs2642990 | NP_056261 | N | S | NS | benign            |
| rs2643103 | NP_060149 | S | N | SN | benign            |
| rs2643766 | NP_001449 | G | D | GD | probably damaging |
| rs2643767 | NP_001449 | A | T | AT | benign            |
| rs2643806 | NP_060795 | L | F | LF | benign            |
| rs2644225 | NP_851421 | Q | R | QR | benign            |
| rs2644225 | NP_851422 | Q | R | QR | benign            |
| rs2644225 | NP_055818 | Q | R | QR | benign            |
| rs2644225 | XP_496064 | Q | R | QR | benign            |
| rs2644242 | XP_372565 | G | R | GR | probably damaging |
| rs2644242 | XP_372563 | R | G | RG | probably damaging |
| rs2644337 | NP_006301 | Y | C | YC | probably damaging |
| rs2644906 | NP_000753 | V | M | VM | benign            |
| rs2645329 | NP_000834 | P | Q | PQ | benign            |
| rs2647573 | XP_372355 | F | S | FS | benign            |
| rs2649398 | NP_065703 | R | Q | RQ | benign            |
| rs2649399 | NP_065703 | K | R | KR | benign            |
| rs2649505 | XP_170842 | D | Y | DY | probably damaging |
| rs2649505 | NP_848666 | Y | D | YD | probably damaging |
| rs2649506 | XP_170842 | E | G | EG | possibly damaging |
| rs2649506 | NP_848666 | G | E | GE | possibly damaging |
| rs2650093 | NP_005100 | A | P | AP | possibly damaging |
| rs2650190 | XP_495902 | N | K | NK | benign            |
| rs2650537 | XP_373693 | R | W | RW | probably damaging |
| rs2650549 | NP_872425 | A | T | AT | benign            |
| rs2650549 | NP_775890 | A | T | AT | benign            |
| rs2652098 | NP_004376 | S | L | SL | benign            |
| rs2653218 | XP_370845 | C | F | CF | probably damaging |
| rs2653218 | XP_370849 | F | C | FC | probably damaging |
| rs2653349 | NP_001517 | V | I | VI | benign            |
| rs2653406 | NP_004458 | P | L | PL | benign            |
| rs2653406 | NP_671736 | P | L | PL | benign            |
| rs2653406 | NP_963846 | P | L | PL | benign            |
| rs2653406 | NP_963847 | P | L | PL | benign            |
| rs2653414 | NP_004458 | W | L | WL | probably damaging |
| rs2653414 | NP_671736 | W | L | WL | probably damaging |
| rs2653414 | NP_963846 | W | L | WL | probably damaging |
| rs2653414 | NP_963847 | W | L | WL | probably damaging |
| rs2653588 | NP_065694 | P | L | PL | probably damaging |
| rs2654297 | NP_065703 | A | V | AV | benign            |
| rs2654560 | NP_443121 | E | G | EG | benign            |

|           |           |   |   |    |                   |
|-----------|-----------|---|---|----|-------------------|
| rs2655655 | NP_859065 | S | L | SL | possibly damaging |
| rs2657167 | XP_061674 | S | R | SR | benign            |
| rs2657879 | NP_037399 | L | P | LP | benign            |
| rs2657881 | NP_997227 | T | M | TM | possibly damaging |
| rs2658658 | NP_149022 | T | M | TM | possibly damaging |
| rs2658973 | NP_006150 | V | I | VI | benign            |
| rs2659015 | XP_045581 | T | A | TA | benign            |
| rs2659016 | XP_045581 | V | A | VA | benign            |
| rs2659141 | XP_370893 | M | I | MI | benign            |
| rs2659153 | XP_370893 | S | F | SF | probably damaging |
| rs2659368 | XP_290342 | N | D | ND | benign            |
| rs2659375 | XP_290342 | E | G | EG | possibly damaging |
| rs2659395 | XP_290342 | H | R | HR | possibly damaging |
| rs2659585 | NP_079216 | R | K | RK | benign            |
| rs2659745 | XP_370968 | P | L | PL | benign            |
| rs2659776 | XP_370968 | R | G | RG | benign            |
| rs2659860 | NP_056139 | P | S | PS | benign            |
| rs2659874 | NP_003728 | R | T | RT | benign            |
| rs2659875 | NP_003728 | R | C | RC | benign            |
| rs2659879 | XP_090203 | R | G | RG | benign            |
| rs2659880 | XP_090203 | V | L | VL | benign            |
| rs2661487 | NP_619639 | R | H | RH | benign            |
| rs2661488 | NP_619639 | I | N | IN | benign            |
| rs2662263 | NP_775941 | R | S | RS | benign            |
| rs2662469 | XP_376420 | N | D | ND | benign            |
| rs2663571 | XP_497773 | Y | C | YC | possibly damaging |
| rs2663572 | XP_497773 | D | G | DG | benign            |
| rs2663573 | XP_497773 | H | Q | HQ | benign            |
| rs2663698 | NP_005397 | C | R | CR | probably damaging |
| rs2664060 | NP_788954 | A | P | AP | benign            |
| rs2664521 | NP_065871 | E | K | EK | benign            |
| rs2664531 | NP_002457 | P | R | PR | probably damaging |
| rs2664535 | NP_001307 | S | P | SP | possibly damaging |
| rs2664535 | NP_803185 | S | P | SP | possibly damaging |
| rs2664538 | NP_004985 | R | Q | RQ | benign            |
| rs2664553 | NP_647539 | V | E | VE | probably damaging |
| rs2664553 | NP_003395 | V | E | VE | probably damaging |
| rs2664556 | NP_001307 | K | Q | KQ | benign            |
| rs2664556 | NP_803185 | K | Q | KQ | benign            |
| rs2664569 | NP_065871 | H | Q | HQ | probably damaging |
| rs2664578 | NP_066363 | L | V | LV | benign            |
| rs2664581 | NP_002629 | T | P | TP | benign            |
| rs2664731 | XP_497711 | A | V | AV | benign            |
| rs2664732 | XP_497711 | M | T | MT | benign            |
| rs2664891 | NP_064544 | L | F | LF | benign            |
| rs2665055 | XP_208847 | F | L | FL | benign            |

|           |           |   |   |    |                   |
|-----------|-----------|---|---|----|-------------------|
| rs2665055 | XP_497431 | L | F | LF | benign            |
| rs2666232 | XP_497217 | D | E | DE | possibly damaging |
| rs2666472 | NP_859063 | A | V | AV | benign            |
| rs2666626 | NP_002529 | K | N | KN | benign            |
| rs2667661 | NP_057195 | E | G | EG | benign            |
| rs2667672 | XP_372607 | L | M | LM | benign            |
| rs2667673 | XP_372607 | R | G | RG | probably damaging |
| rs2667674 | XP_372607 | L | P | LP | possibly damaging |
| rs2668672 | XP_496227 | C | W | CW | probably damaging |
| rs2668960 | NP_115971 | V | A | VA | benign            |
| rs2668979 | XP_496236 | L | P | LP | probably damaging |
| rs2668979 | NP_115971 | P | L | PL | probably damaging |
| rs2668982 | XP_496236 | S | A | SA | benign            |
| rs2668998 | NP_115971 | V | L | VL | benign            |
| rs2669142 | XP_374765 | V | A | VA | benign            |
| rs2669761 | XP_350781 | P | T | PT | benign            |
| rs2669761 | XP_290482 | T | P | TP | probably damaging |
| rs2669875 | NP_000415 | T | S | TS | benign            |
| rs2671983 | XP_376622 | Y | C | YC | benign            |
| rs2671984 | XP_376622 | F | L | FL | benign            |
| rs2672150 | XP_371558 | T | P | TP | benign            |
| rs2672150 | XP_292982 | T | P | TP | probably damaging |
| rs2672199 | XP_496593 | L | V | LV | benign            |
| rs2672511 | XP_372424 | V | I | VI | benign            |
| rs2674153 | XP_496559 | R | L | RL | benign            |
| rs2674191 | XP_496581 | I | T | IT | benign            |
| rs2675703 | NP_150598 | P | L | PL | probably damaging |
| rs2676126 | NP_689728 | P | A | PA | possibly damaging |
| rs2676564 | NP_003543 | S | R | SR | possibly damaging |
| rs2676567 | NP_003543 | L | P | LP | benign            |
| rs2676568 | NP_003543 | N | S | NS | possibly damaging |
| rs2676701 | NP_057341 | S | N | SN | benign            |
| rs2677622 | XP_497879 | C | Y | CY | probably damaging |
| rs2677879 | NP_073751 | Q | K | QK | benign            |
| rs2678985 | XP_496159 | G | C | GC | probably damaging |
| rs2679117 | NP_003604 | R | Q | RQ | benign            |
| rs2679118 | NP_003604 | E | K | EK | benign            |
| rs2680701 | NP_060233 | P | L | PL | probably damaging |
| rs2680704 | NP_004749 | A | P | AP | benign            |
| rs2680925 | NP_064569 | G | A | GA | possibly damaging |
| rs2681095 | NP_000087 | R | K | RK | benign            |
| rs2681417 | NP_787058 | I | V | IV | benign            |
| rs2682123 | NP_659477 | R | P | RP | probably damaging |
| rs2682145 | XP_496769 | R | T | RT | possibly damaging |
| rs2682173 | XP_496769 | Q | K | QK | benign            |
| rs2682174 | XP_496769 | S | A | SA | benign            |

|           |           |   |   |    |                   |
|-----------|-----------|---|---|----|-------------------|
| rs2682175 | XP_376474 | E | G | EG | probably damaging |
| rs2682175 | XP_496769 | G | E | GE | probably damaging |
| rs2682177 | XP_496769 | R | G | RG | probably damaging |
| rs2682343 | NP_775487 | G | A | GA | benign            |
| rs2682484 | NP_006602 | Y | F | YF | possibly damaging |
| rs2682494 | NP_031359 | P | H | PH | benign            |
| rs2682495 | NP_031359 | S | C | SC | possibly damaging |
| rs2682557 | NP_006288 | Y | N | YN | benign            |
| rs2684062 | XP_372028 | D | N | DN | benign            |
| rs2684062 | XP_372030 | N | D | ND | benign            |
| rs2684067 | XP_498273 | V | L | VL | benign            |
| rs2684348 | XP_376353 | M | V | MV | benign            |
| rs2684498 | XP_496237 | P | S | PS | benign            |
| rs2684498 | NP_055613 | S | P | SP | benign            |
| rs2684499 | NP_055613 | P | L | PL | benign            |
| rs2684500 | NP_055613 | F | S | FS | benign            |
| rs2684501 | NP_055613 | P | S | PS | benign            |
| rs2684502 | NP_055613 | R | Q | RQ | benign            |
| rs2684521 | XP_496237 | Q | R | QR | benign            |
| rs2684710 | XP_496237 | Q | R | QR | benign            |
| rs2684710 | NP_055613 | R | Q | RQ | benign            |
| rs2684711 | NP_055613 | C | Y | CY | benign            |
| rs2684711 | XP_496237 | Y | C | YC | benign            |
| rs2684712 | NP_055613 | L | P | LP | benign            |
| rs2684713 | NP_055613 | T | M | TM | benign            |
| rs2684875 | NP_057455 | K | E | KE | benign            |
| rs2685000 | XP_379210 | S | I | SI | benign            |
| rs2686810 | NP_002310 | S | N | SN | benign            |
| rs2687015 | NP_060734 | R | W | RW | benign            |
| rs2687333 | XP_496692 | L | P | LP | possibly damaging |
| rs2687883 | NP_775743 | L | M | LM | benign            |
| rs2688561 | XP_171032 | R | G | RG | probably damaging |
| rs2688562 | XP_171032 | R | G | RG | probably damaging |
| rs2688571 | XP_171032 | G | W | GW | possibly damaging |
| rs2688572 | XP_171032 | T | N | TN | benign            |
| rs2688753 | NP_689923 | R | I | RI | benign            |
| rs2690207 | NP_060734 | G | R | GR | benign            |
| rs2690413 | XP_376622 | N | T | NT | benign            |
| rs2690414 | XP_376622 | L | F | LF | benign            |
| rs2690506 | XP_376622 | R | G | RG | benign            |
| rs2690519 | XP_376622 | A | S | AS | benign            |
| rs2690589 | NP_065943 | V | I | VI | benign            |
| rs2690597 | XP_496902 | G | V | GV | benign            |
| rs2691379 | XP_496870 | A | G | AG | benign            |
| rs2691484 | NP_660310 | W | L | WL | probably damaging |
| rs2691511 | XP_498113 | K | E | KE | benign            |

|           |           |   |   |    |                   |
|-----------|-----------|---|---|----|-------------------|
| rs2692622 | NP_056984 | S | N | SN | benign            |
| rs2692696 | NP_001054 | V | I | VI | benign            |
| rs2692901 | XP_376099 | R | H | RH | possibly damaging |
| rs2693113 | XP_496581 | V | E | VE | possibly damaging |
| rs2695167 | XP_031689 | Y | C | YC | probably damaging |
| rs2695315 | NP_689730 | I | V | IV | benign            |
| rs2695316 | NP_689730 | I | M | IM | benign            |
| rs2695485 | XP_293352 | E | K | EK | benign            |
| rs2695486 | XP_293352 | E | D | ED | benign            |
| rs2695550 | NP_060421 | N | S | NS | possibly damaging |
| rs2695550 | NP_060221 | N | S | NS | possibly damaging |
| rs2696513 | XP_496227 | Q | R | QR | benign            |
| rs2696733 | XP_376099 | W | R | WR | possibly damaging |
| rs2696782 | XP_496576 | Q | R | QR | benign            |
| rs2696784 | XP_496576 | C | R | CR | possibly damaging |
| rs2696786 | XP_496576 | E | K | EK | benign            |
| rs2696787 | XP_496576 | E | G | EG | possibly damaging |
| rs2696914 | XP_208043 | L | M | LM | benign            |
| rs2697532 | NP_066008 | S | G | SG | benign            |
| rs2697541 | NP_061993 | L | V | LV | benign            |
| rs2698907 | XP_498273 | H | L | HL | probably damaging |
| rs2698968 | XP_373243 | L | P | LP | probably damaging |
| rs2700161 | NP_002196 | P | S | PS | probably damaging |
| rs2700500 | NP_037452 | A | S | AS | benign            |
| rs2702304 | NP_036257 | L | F | LF | possibly damaging |
| rs2702355 | XP_496694 | T | P | TP | benign            |
| rs2703130 | XP_293687 | P | T | PT | possibly damaging |
| rs2703643 | NP_001198 | V | G | VG | possibly damaging |
| rs2703806 | NP_690868 | L | M | LM | benign            |
| rs2705143 | XP_292136 | C | R | CR | probably damaging |
| rs2705203 | NP_859074 | R | P | RP | possibly damaging |
| rs2705339 | NP_005126 | S | F | SF | benign            |
| rs2706656 | NP_055447 | F | L | FL | benign            |
| rs2706762 | NP_057381 | F | S | FS | benign            |
| rs2707466 | NP_057171 | T | I | TI | benign            |
| rs2707466 | NP_476509 | T | I | TI | benign            |
| rs2707634 | NP_783862 | E | K | EK | benign            |
| rs2707639 | NP_783862 | F | C | FC | possibly damaging |
| rs2707944 | NP_000918 | G | A | GA | probably damaging |
| rs2708380 | NP_795368 | L | M | LM | benign            |
| rs2708742 | XP_371192 | G | S | GS | benign            |
| rs2708743 | XP_371192 | I | S | IS | possibly damaging |
| rs2708890 | XP_059832 | P | H | PH | benign            |
| rs2708912 | XP_059832 | P | L | PL | benign            |
| rs2708943 | NP_775294 | P | R | PR | probably damaging |
| rs2708943 | NP_775297 | P | R | PR | probably damaging |

|           |           |   |   |    |                   |
|-----------|-----------|---|---|----|-------------------|
| rs2708943 | NP_055254 | P | R | PR | probably damaging |
| rs2708947 | NP_775294 | W | R | WR | benign            |
| rs2708947 | NP_775295 | W | R | WR | benign            |
| rs2708947 | NP_775296 | W | R | WR | benign            |
| rs2708947 | NP_775297 | W | R | WR | benign            |
| rs2708947 | NP_055254 | W | R | WR | probably damaging |
| rs2711185 | NP_775836 | C | F | CF | probably damaging |
| rs2711191 | NP_775836 | S | T | ST | benign            |
| rs2712025 | NP_689728 | R | S | RS | benign            |
| rs2713625 | NP_055918 | N | S | NS | benign            |
| rs2714473 | NP_653337 | P | A | PA | benign            |
| rs2714473 | NP_061077 | P | A | PA | possibly damaging |
| rs2715423 | XP_372592 | A | V | AV | benign            |
| rs2715687 | NP_005450 | I | V | IV | benign            |
| rs2715860 | NP_003878 | E | D | ED | benign            |
| rs2716146 | XP_497680 | V | I | VI | benign            |
| rs2716255 | XP_497388 | R | Q | RQ | benign            |
| rs2717858 | NP_620166 | Y | C | YC | probably damaging |
| rs2718131 | XP_371956 | P | A | PA | benign            |
| rs2718387 | XP_498223 | G | S | GS | probably damaging |
| rs2718698 | NP_852118 | E | Q | EQ | benign            |
| rs2718698 | NP_055450 | E | Q | EQ | benign            |
| rs2719323 | XP_070233 | R | Q | RQ | benign            |
| rs2719582 | XP_376756 | I | T | IT | benign            |
| rs2719710 | NP_653275 | Q | R | QR | benign            |
| rs2720299 | XP_035497 | T | I | TI | benign            |
| rs2722084 | XP_496026 | G | E | GE | possibly damaging |
| rs2722372 | NP_057700 | R | K | RK | benign            |
| rs2722532 | XP_088768 | T | I | TI | benign            |
| rs2722722 | NP_037512 | Y | H | YH | benign            |
| rs2722723 | NP_037512 | Q | E | QE | benign            |
| rs2722863 | XP_497072 | H | Q | HQ | probably damaging |
| rs2723088 | NP_055962 | N | K | NK | benign            |
| rs2723089 | NP_055962 | C | S | CS | probably damaging |
| rs2723183 | NP_775297 | N | S | NS | benign            |
| rs2723183 | NP_055254 | N | S | NS | benign            |
| rs2723187 | NP_775294 | P | L | PL | benign            |
| rs2723187 | NP_775295 | P | L | PL | benign            |
| rs2723187 | NP_775296 | P | L | PL | benign            |
| rs2723187 | NP_775297 | P | L | PL | benign            |
| rs2723187 | NP_055254 | P | L | PL | probably damaging |
| rs2723192 | NP_775294 | D | N | DN | benign            |
| rs2723192 | NP_775295 | D | N | DN | benign            |
| rs2723192 | NP_775296 | D | N | DN | benign            |
| rs2723192 | NP_775297 | D | N | DN | benign            |
| rs2723192 | NP_055254 | D | N | DN | benign            |

|           |              |   |   |    |                   |
|-----------|--------------|---|---|----|-------------------|
| rs2723753 | XP_372468    | W | R | WR | possibly damaging |
| rs2724693 | NP_775814    | R | W | RW | probably damaging |
| rs2725362 | NP_000544    | F | L | FL | benign            |
| rs2726836 | XP_084514    | C | Y | CY | probably damaging |
| rs2727288 | NP_060117    | C | S | CS | benign            |
| rs2727306 | NP_000325    | D | N | DN | benign            |
| rs2727307 | NP_072101    | D | E | DE | benign            |
| rs2727307 | NP_072102    | D | E | DE | benign            |
| rs2727307 | NP_072103    | D | E | DE | benign            |
| rs2728181 | XP_496715    | R | L | RL | benign            |
| rs2728244 | XP_496715    | Q | R | QR | benign            |
| rs2728533 | NP_001354    | G | D | GD | probably damaging |
| rs2728534 | NP_001354    | I | S | IS | probably damaging |
| rs2728726 | NP_001354    | L | I | LI | benign            |
| rs2728932 | XP_496629    | S | L | SL | benign            |
| rs2729509 | NP_714544    | F | S | FS | benign            |
| rs2729526 | NP_742093    | N | H | NH | benign            |
| rs2729526 | NP_473361    | N | H | NH | benign            |
| rs2729526 | NP_742094    | N | H | NH | possibly damaging |
| rs2729709 | NP_002340    | K | M | KM | possibly damaging |
| rs2729772 | NP_878253    | K | R | KR | benign            |
| rs2729835 | NP_116246    | R | K | RK | benign            |
| rs2731021 | NP_037452    | Q | H | QH | benign            |
| rs2731038 | XP_495922    | M | V | MV | benign            |
| rs2731073 | XP_292136    | M | V | MV | benign            |
| rs2732399 | XP_496916    | M | I | MI | benign            |
| rs2732400 | XP_496916    | L | F | LF | benign            |
| rs2732441 | NP_861453    | R | G | RG | possibly damaging |
| rs2732481 | NP_689533    | Q | P | QP | possibly damaging |
| rs2732614 | XP_496227    | G | D | GD | benign            |
| rs2733743 | NP_000695    | A | V | AV | benign            |
| rs2734316 | NP_000583    | A | V | AV | benign            |
| rs2734316 | NP_001002029 | A | V | AV | benign            |
| rs2734318 | NP_000583    | S | C | SC | probably damaging |
| rs2734318 | NP_001002029 | S | C | SC | probably damaging |
| rs2734319 | NP_000583    | L | P | LP | probably damaging |
| rs2734319 | NP_001002029 | L | P | LP | probably damaging |
| rs2734329 | NP_008860    | G | R | GR | probably damaging |
| rs2734705 | NP_001276    | S | N | SN | benign            |
| rs2734715 | NP_000382    | S | L | SL | possibly damaging |
| rs2734742 | NP_002696    | S | R | SR | benign            |
| rs2734849 | NP_848605    | H | R | HR | possibly damaging |
| rs2735420 | NP_008924    | N | I | NI | probably damaging |
| rs2735510 | XP_113871    | L | F | LF | benign            |
| rs2735668 | NP_000017    | M | I | MI | benign            |
| rs2735868 | XP_497991    | C | R | CR | benign            |



|           |           |   |   |    |                   |
|-----------|-----------|---|---|----|-------------------|
| rs2736158 | NP_004629 | A | G | AG | benign            |
| rs2736158 | NP_542417 | A | G | AG | benign            |
| rs2736182 | NP_001614 | G | R | GR | probably damaging |
| rs2736269 | NP_473369 | C | S | CS | benign            |
| rs2736416 | NP_055033 | S | R | SR | benign            |
| rs2736531 | XP_372354 | L | R | LR | benign            |
| rs2736586 | XP_372355 | V | M | VM | benign            |
| rs2736654 | NP_006699 | A | E | AE | benign            |
| rs2736720 | NP_005677 | P | L | PL | probably damaging |
| rs2736721 | NP_005677 | Y | C | YC | probably damaging |
| rs2736722 | NP_005677 | A | G | AG | benign            |
| rs2736880 | NP_001356 | E | V | EV | possibly damaging |
| rs2736975 | XP_290758 | K | E | KE | benign            |
| rs2736976 | NP_008977 | R | Q | RQ | benign            |
| rs2737085 | NP_000201 | Y | D | YD | probably damaging |
| rs2737502 | XP_499097 | N | K | NK | benign            |
| rs2737502 | XP_499099 | N | K | NK | benign            |
| rs2737713 | NP_006490 | F | Y | FY | benign            |
| rs2737713 | NP_963837 | F | Y | FY | benign            |
| rs2737713 | NP_963838 | F | Y | FY | benign            |
| rs2737713 | NP_963839 | F | Y | FY | benign            |
| rs2737727 | NP_002678 | D | E | DE | benign            |
| rs2737728 | NP_002678 | Q | E | QE | benign            |
| rs2737730 | NP_002678 | H | P | HP | probably damaging |
| rs2737799 | NP_000368 | V | A | VA | benign            |
| rs2737820 | NP_877495 | E | D | ED | benign            |
| rs2737820 | NP_068779 | E | D | ED | benign            |
| rs2737993 | XP_496957 | E | D | ED | benign            |
| rs2737995 | NP_689463 | P | L | PL | probably damaging |
| rs2738035 | NP_057596 | D | G | DG | benign            |
| rs2738047 | NP_005209 | V | I | VI | benign            |
| rs2738295 | NP_006602 | F | S | FS | probably damaging |
| rs2738755 | NP_068777 | P | L | PL | probably damaging |
| rs2738787 | NP_116575 | G | R | GR | possibly damaging |
| rs2738935 | XP_497781 | K | E | KE | benign            |
| rs2738938 | XP_497781 | A | V | AV | benign            |
| rs2739199 | NP_000316 | N | K | NK | benign            |
| rs2739199 | NP_700476 | N | K | NK | benign            |
| rs2739199 | NP_700475 | N | K | NK | benign            |
| rs2739207 | NP_700476 | V | L | VL | benign            |
| rs2739207 | NP_700475 | V | L | VL | benign            |
| rs2739256 | NP_000709 | A | D | AD | benign            |
| rs2739502 | NP_378666 | P | R | PR | benign            |
| rs2739502 | NP_378662 | P | R | PR | benign            |
| rs2740348 | NP_056536 | E | Q | EQ | benign            |
| rs2740349 | NP_056536 | N | D | ND | benign            |

|           |           |   |   |    |                   |
|-----------|-----------|---|---|----|-------------------|
| rs2740374 | NP_060187 | Q | P | QP | benign            |
| rs2740374 | NP_112554 | Q | P | QP | benign            |
| rs2740374 | NP_068743 | Q | P | QP | benign            |
| rs2740375 | NP_068743 | S | P | SP | possibly damaging |
| rs2740379 | NP_112554 | S | C | SC | benign            |
| rs2740379 | NP_068743 | S | C | SC | possibly damaging |
| rs2740582 | NP_061993 | Q | H | QH | benign            |
| rs2740583 | NP_061993 | F | L | FL | benign            |
| rs2740707 | NP_478107 | P | Q | PQ | possibly damaging |
| rs2740707 | NP_478108 | P | Q | PQ | possibly damaging |
| rs2740707 | NP_478109 | P | Q | PQ | possibly damaging |
| rs2740707 | NP_478110 | P | Q | PQ | possibly damaging |
| rs2741058 | XP_498268 | R | G | RG | possibly damaging |
| rs2741281 | NP_004817 | H | Q | HQ | probably damaging |
| rs2741574 | NP_057021 | S | R | SR | benign            |
| rs2741575 | NP_057021 | T | S | TS | benign            |
| rs2741582 | NP_057021 | E | K | EK | benign            |
| rs2741744 | NP_003687 | I | T | IT | probably damaging |
| rs2741745 | NP_003687 | P | S | PS | probably damaging |
| rs2741764 | XP_291981 | A | T | AT | benign            |
| rs2741804 | XP_062286 | M | T | MT | benign            |
| rs2741976 | NP_741996 | E | K | EK | benign            |
| rs2742015 | NP_005512 | A | T | AT | benign            |
| rs2742132 | NP_006744 | A | T | AT | benign            |
| rs2743304 | NP_003824 | F | L | FL | possibly damaging |
| rs2743304 | NP_085080 | F | L | FL | possibly damaging |
| rs2743304 | NP_085095 | F | L | FL | probably damaging |
| rs2743332 | NP_055091 | L | V | LV | benign            |
| rs2743337 | NP_055091 | L | I | LI | benign            |
| rs2743458 | NP_000097 | Y | C | YC | probably damaging |
| rs2743966 | XP_372763 | W | R | WR | possibly damaging |
| rs2743967 | XP_372763 | M | L | ML | benign            |
| rs2743969 | XP_375688 | M | R | MR | probably damaging |
| rs2744550 | XP_376472 | S | G | SG | benign            |
| rs2744559 | XP_376472 | G | S | GS | benign            |
| rs2745097 | XP_372607 | A | D | AD | benign            |
| rs2745098 | XP_372607 | R | K | RK | benign            |
| rs2745099 | XP_372607 | H | N | HN | probably damaging |
| rs2745101 | XP_372607 | R | W | RW | possibly damaging |
| rs2746395 | NP_005501 | D | V | DV | probably damaging |
| rs2746396 | NP_005501 | D | E | DE | benign            |
| rs2746400 | NP_008860 | V | G | VG | possibly damaging |
| rs2746404 | NP_061978 | V | L | VL | benign            |
| rs2746405 | NP_061978 | V | G | VG | possibly damaging |
| rs2746409 | NP_061978 | G | A | GA | benign            |
| rs2746413 | NP_000583 | R | L | RL | possibly damaging |

|           |              |   |   |    |                   |
|-----------|--------------|---|---|----|-------------------|
| rs2746413 | NP_001002029 | R | L | RL | possibly damaging |
| rs2746414 | NP_001002029 | S | N | SN | benign            |
| rs2746603 | NP_006056    | R | H | RH | benign            |
| rs2746687 | XP_497678    | A | V | AV | benign            |
| rs2746984 | NP_009160    | M | I | MI | probably damaging |
| rs2746991 | NP_937782    | K | N | KN | benign            |
| rs2746991 | NP_002998    | K | N | KN | possibly damaging |
| rs2747234 | XP_375931    | F | L | FL | benign            |
| rs2747361 | XP_375931    | A | G | AG | benign            |
| rs2747379 | XP_375931    | R | H | RH | possibly damaging |
| rs2747553 | NP_116208    | R | Q | RQ | benign            |
| rs2747700 | XP_371832    | T | N | TN | benign            |
| rs2747701 | XP_371832    | D | G | DG | benign            |
| rs2747761 | NP_005609    | G | R | GR | probably damaging |
| rs2747834 | XP_498321    | C | Y | CY | probably damaging |
| rs2748427 | NP_009198    | W | R | WR | possibly damaging |
| rs2748529 | NP_000350    | Q | H | QH | possibly damaging |
| rs2749836 | XP_499140    | L | V | LV | benign            |
| rs2753327 | NP_000072    | V | I | VI | benign            |
| rs2753386 | NP_001276    | K | R | KR | benign            |
| rs2753960 | NP_006286    | P | T | PT | possibly damaging |
| rs2754158 | NP_000248    | R | G | RG | benign            |
| rs2754166 | NP_000248    | D | E | DE | benign            |
| rs2754386 | XP_374786    | L | P | LP | benign            |
| rs2756017 | XP_497217    | P | T | PT | probably damaging |
| rs2756018 | XP_497217    | G | A | GA | possibly damaging |
| rs2756081 | NP_000895    | F | L | FL | probably damaging |
| rs2756923 | NP_055034    | A | T | AT | benign            |
| rs2756923 | NP_055033    | T | A | TA | benign            |
| rs2756932 | NP_065396    | T | A | TA | possibly damaging |
| rs2756933 | NP_065396    | N | D | ND | possibly damaging |
| rs2756934 | NP_065396    | G | S | GS | benign            |
| rs2756947 | NP_065396    | E | G | EG | benign            |
| rs2757594 | NP_689764    | P | L | PL | probably damaging |
| rs2757884 | NP_110383    | K | N | KN | benign            |
| rs2757969 | NP_997188    | L | P | LP | benign            |
| rs2757970 | NP_036316    | K | Q | KQ | benign            |
| rs2757971 | NP_036316    | T | N | TN | possibly damaging |
| rs2758568 | XP_497242    | V | A | VA | benign            |
| rs2758568 | XP_497240    | A | V | AV | possibly damaging |
| rs2758569 | XP_497240    | S | F | SF | probably damaging |
| rs2758714 | XP_208213    | M | I | MI | benign            |
| rs2758717 | XP_208213    | K | R | KR | benign            |
| rs2758910 | NP_113648    | R | Q | RQ | benign            |
| rs2760118 | NP_733936    | H | Y | HY | benign            |
| rs2760118 | NP_001071    | H | Y | HY | benign            |

|           |           |   |   |    |                   |
|-----------|-----------|---|---|----|-------------------|
| rs2760320 | NP_060288 | M | I | MI | benign            |
| rs2760708 | XP_375928 | C | Y | CY | probably damaging |
| rs2761326 | NP_579899 | L | F | LF | benign            |
| rs2761326 | NP_038479 | L | F | LF | benign            |
| rs2761671 | XP_377028 | R | C | RC | possibly damaging |
| rs2762875 | XP_378185 | R | Q | RQ | benign            |
| rs2762877 | XP_378185 | S | P | SP | benign            |
| rs2763132 | XP_498040 | V | M | VM | benign            |
| rs2764043 | NP_110447 | L | P | LP | possibly damaging |
| rs2764337 | NP_006838 | K | Q | KQ | benign            |
| rs2764657 | XP_371261 | G | V | GV | probably damaging |
| rs2766597 | NP_001823 | L | P | LP | possibly damaging |
| rs2766676 | NP_006517 | S | P | SP | benign            |
| rs2767101 | XP_495840 | H | Y | HY | benign            |
| rs2767468 | NP_060658 | W | R | WR | possibly damaging |
| rs2767471 | NP_060658 | A | S | AS | benign            |
| rs2768857 | XP_375041 | D | Y | DY | probably damaging |
| rs2770144 | NP_612566 | V | G | VG | possibly damaging |
| rs2770144 | NP_612567 | V | G | VG | possibly damaging |
| rs2770145 | NP_612566 | C | W | CW | probably damaging |
| rs2770145 | NP_612567 | C | W | CW | probably damaging |
| rs2770928 | NP_055387 | S | G | SG | benign            |
| rs2770945 | NP_203128 | Q | E | QE | benign            |
| rs2770945 | NP_976038 | Q | E | QE | benign            |
| rs2770946 | NP_203128 | P | S | PS | possibly damaging |
| rs2770946 | NP_976038 | P | S | PS | possibly damaging |
| rs2771350 | NP_073571 | A | P | AP | benign            |
| rs2772133 | XP_370738 | N | Y | NY | possibly damaging |
| rs2773347 | NP_640339 | Q | R | QR | benign            |
| rs2774384 | XP_034717 | G | C | GC | probably damaging |
| rs2774531 | NP_002588 | E | D | ED | benign            |
| rs2774532 | NP_002588 | M | I | MI | possibly damaging |
| rs2774896 | XP_379639 | K | R | KR | benign            |
| rs2774896 | XP_499140 | K | R | KR | benign            |
| rs2774897 | XP_379639 | T | A | TA | benign            |
| rs2774897 | XP_499140 | T | A | TA | benign            |
| rs2774960 | XP_371956 | P | L | PL | benign            |
| rs2774962 | XP_371956 | R | G | RG | possibly damaging |
| rs2775253 | XP_063310 | M | K | MK | possibly damaging |
| rs2775254 | XP_063310 | G | S | GS | benign            |
| rs2775451 | XP_497773 | V | F | VF | benign            |
| rs2775778 | XP_375931 | H | N | HN | benign            |
| rs2777140 | XP_372112 | G | E | GE | probably damaging |
| rs2777382 | XP_497053 | H | R | HR | benign            |
| rs2777382 | XP_497052 | R | H | RH | possibly damaging |
| rs2778031 | XP_372125 | C | R | CR | probably damaging |

|           |           |   |   |    |                   |
|-----------|-----------|---|---|----|-------------------|
| rs2778238 | XP_497089 | R | G | RG | benign            |
| rs2778238 | XP_497024 | R | G | RG | possibly damaging |
| rs2778284 | XP_372121 | H | Q | HQ | benign            |
| rs2778390 | NP_060046 | R | Q | RQ | benign            |
| rs2778979 | NP_116201 | I | V | IV | benign            |
| rs2780605 | XP_374318 | R | W | RW | possibly damaging |
| rs2781608 | XP_371227 | A | T | AT | benign            |
| rs2781773 | NP_006660 | E | A | EA | possibly damaging |
| rs2781806 | NP_115939 | T | S | TS | benign            |
| rs2782871 | NP_002408 | L | P | LP | possibly damaging |
| rs2782872 | NP_002408 | A | T | AT | benign            |
| rs2782873 | NP_002408 | V | I | VI | benign            |
| rs2782874 | NP_002408 | V | L | VL | benign            |
| rs2783175 | NP_612426 | D | E | DE | benign            |
| rs2783350 | NP_056386 | A | G | AG | benign            |
| rs2783909 | XP_374318 | T | S | TS | benign            |
| rs2784228 | NP_619639 | S | F | SF | benign            |
| rs2784734 | NP_036234 | T | A | TA | benign            |
| rs2785332 | NP_060961 | T | A | TA | benign            |
| rs2787344 | NP_110394 | Y | C | YC | probably damaging |
| rs2787772 | XP_034717 | M | K | MK | benign            |
| rs2789417 | NP_254273 | L | I | LI | benign            |
| rs2789975 | NP_116279 | E | D | ED | benign            |
| rs2790301 | XP_059095 | V | L | VL | benign            |
| rs2790301 | XP_209227 | V | L | VL | benign            |
| rs2791483 | NP_001276 | K | N | KN | benign            |
| rs2791494 | NP_001276 | T | M | TM | benign            |
| rs2792497 | XP_375931 | V | E | VE | benign            |
| rs2792529 | XP_375931 | A | T | AT | benign            |
| rs2792531 | XP_371111 | N | D | ND | benign            |
| rs2792534 | XP_371111 | L | V | LV | benign            |
| rs2792751 | NP_065969 | V | I | VI | benign            |
| rs2794763 | XP_375853 | M | V | MV | possibly damaging |
| rs2795529 | NP_055568 | I | F | IF | benign            |
| rs2795530 | NP_055568 | G | A | GA | possibly damaging |
| rs2796025 | XP_376902 | I | V | IV | benign            |
| rs2796835 | NP_001072 | W | S | WS | probably damaging |
| rs2797373 | NP_071403 | D | G | DG | benign            |
| rs2797491 | XP_374765 | R | P | RP | probably damaging |
| rs2797501 | XP_374765 | S | N | SN | benign            |
| rs2797741 | XP_375688 | H | Y | HY | benign            |
| rs2797848 | NP_000778 | D | A | DA | probably damaging |
| rs2798284 | XP_035572 | C | W | CW | possibly damaging |
| rs2798669 | NP_002408 | D | N | DN | benign            |
| rs2798851 | XP_378185 | R | Q | RQ | benign            |
| rs2798855 | XP_378185 | K | Q | KQ | benign            |

|           |           |   |   |    |                   |
|-----------|-----------|---|---|----|-------------------|
| rs2798901 | XP_378185 | W | R | WR | possibly damaging |
| rs2799068 | XP_372195 | E | K | EK | benign            |
| rs2799627 | NP_005790 | M | I | MI | benign            |
| rs2799627 | NP_795352 | M | I | MI | benign            |
| rs2799627 | NP_795353 | M | I | MI | benign            |
| rs2800889 | NP_000668 | M | K | MK | possibly damaging |
| rs2801164 | XP_372500 | I | T | IT | possibly damaging |
| rs2801625 | NP_694853 | P | R | PR | probably damaging |
| rs2802269 | NP_055641 | A | V | AV | benign            |
| rs2802269 | NP_003598 | A | V | AV | benign            |
| rs2803140 | NP_777283 | R | Q | RQ | benign            |
| rs2803140 | NP_036225 | R | Q | RQ | benign            |
| rs2804003 | NP_796374 | A | V | AV | benign            |
| rs2804653 | XP_374786 | V | L | VL | benign            |
| rs2805105 | XP_495824 | T | P | TP | possibly damaging |
| rs2805146 | XP_290482 | R | Q | RQ | benign            |
| rs2805146 | XP_350781 | R | Q | RQ | benign            |
| rs2805245 | XP_290482 | T | A | TA | benign            |
| rs2805245 | XP_350781 | T | A | TA | benign            |
| rs2805246 | XP_350781 | R | T | RT | benign            |
| rs2805246 | XP_290482 | R | T | RT | possibly damaging |
| rs2805273 | XP_378228 | L | V | LV | benign            |
| rs2805274 | XP_378228 | P | L | PL | probably damaging |
| rs2806180 | XP_498040 | V | A | VA | benign            |
| rs2806482 | XP_495808 | Q | E | QE | benign            |
| rs2807157 | XP_498448 | C | S | CS | probably damaging |
| rs2808001 | NP_001060 | A | V | AV | probably damaging |
| rs2808001 | NP_821080 | A | V | AV | probably damaging |
| rs2808096 | NP_060757 | F | S | FS | benign            |
| rs2808136 | XP_496032 | L | F | LF | benign            |
| rs2808415 | NP_775960 | N | T | NT | benign            |
| rs2808967 | XP_372094 | C | R | CR | benign            |
| rs2809185 | XP_497052 | A | V | AV | benign            |
| rs2809185 | XP_497053 | V | A | VA | benign            |
| rs2810487 | NP_031397 | E | D | ED | benign            |
| rs2810566 | NP_078779 | R | H | RH | benign            |
| rs2811741 | NP_078994 | E | Q | EQ | benign            |
| rs2811795 | NP_116263 | R | W | RW | possibly damaging |
| rs2814054 | NP_036564 | A | P | AP | benign            |
| rs2814436 | XP_372468 | M | T | MT | possibly damaging |
| rs2815413 | NP_996769 | T | N | TN | possibly damaging |
| rs2815427 | NP_031384 | S | C | SC | benign            |
| rs2815960 | XP_497391 | G | D | GD | probably damaging |
| rs2816642 | NP_002217 | G | A | GA | possibly damaging |
| rs2816642 | NP_660142 | G | A | GA | possibly damaging |
| rs2817191 | XP_376472 | V | A | VA | benign            |

|           |           |   |   |    |                   |
|-----------|-----------|---|---|----|-------------------|
| rs2817394 | NP_003212 | S | A | SA | probably damaging |
| rs2817580 | XP_052561 | G | S | GS | benign            |
| rs2817673 | NP_003052 | P | L | PL | probably damaging |
| rs2817793 | XP_498127 | H | R | HR | benign            |
| rs2817794 | XP_498127 | G | C | GC | probably damaging |
| rs2819419 | XP_290629 | Y | D | YD | probably damaging |
| rs2819420 | XP_290629 | G | R | GR | possibly damaging |
| rs2819422 | XP_290629 | V | A | VA | benign            |
| rs2819423 | XP_290629 | K | N | KN | benign            |
| rs2819425 | XP_290629 | S | P | SP | benign            |
| rs2819590 | NP_877437 | S | N | SN | benign            |
| rs2820289 | NP_065176 | S | L | SL | benign            |
| rs2820312 | NP_036266 | T | M | TM | benign            |
| rs2820477 | XP_015717 | E | D | ED | benign            |
| rs2821008 | XP_031401 | L | P | LP | benign            |
| rs2821831 | XP_375931 | K | I | KI | possibly damaging |
| rs2821856 | XP_375931 | T | M | TM | benign            |
| rs2822023 | XP_497774 | T | I | TI | benign            |
| rs2822028 | XP_497774 | V | F | VF | benign            |
| rs2822558 | NP_742021 | S | N | SN | benign            |
| rs2822785 | NP_071419 | Y | H | YH | benign            |
| rs2822786 | NP_071419 | P | L | PL | probably damaging |
| rs2822787 | NP_071419 | D | N | DN | benign            |
| rs2824494 | NP_059143 | Y | H | YH | possibly damaging |
| rs2824495 | NP_059143 | N | K | NK | benign            |
| rs2824721 | NP_002763 | S | P | SP | benign            |
| rs2824790 | NP_002763 | Q | E | QE | benign            |
| rs2824804 | NP_002763 | K | R | KR | benign            |
| rs2825214 | XP_371409 | C | Y | CY | probably damaging |
| rs2829897 | NP_002031 | A | V | AV | benign            |
| rs2829900 | NP_002031 | E | K | EK | benign            |
| rs2830585 | NP_008969 | R | H | RH | benign            |
| rs2832126 | XP_497781 | D | E | DE | benign            |
| rs2832127 | XP_497781 | R | Q | RQ | benign            |
| rs2832129 | XP_497781 | P | R | PR | probably damaging |
| rs2832131 | XP_497781 | V | F | VF | benign            |
| rs2832851 | NP_853630 | Q | H | QH | possibly damaging |
| rs2832873 | NP_853654 | L | M | LM | benign            |
| rs2834167 | NP_000619 | K | E | KE | benign            |
| rs2835239 | NP_059134 | I | V | IV | benign            |
| rs2835285 | NP_001227 | V | I | VI | benign            |
| rs2837029 | NP_689718 | G | S | GS | benign            |
| rs2837225 | XP_086761 | D | E | DE | benign            |
| rs2838012 | NP_478066 | V | M | VM | benign            |
| rs2838171 | NP_733751 | I | N | IN | probably damaging |
| rs2838497 | NP_937798 | L | V | LV | benign            |

|           |           |   |   |    |                   |
|-----------|-----------|---|---|----|-------------------|
| rs2838497 | NP_004640 | L | V | LV | benign            |
| rs2838602 | NP_859016 | V | D | VD | probably damaging |
| rs2838622 | NP_859012 | S | P | SP | probably damaging |
| rs2839110 | NP_478054 | N | S | NS | benign            |
| rs2839110 | NP_478055 | N | S | NS | benign            |
| rs2839158 | NP_002331 | R | Q | RQ | benign            |
| rs2839223 | NP_006022 | G | E | GE | possibly damaging |
| rs2839227 | NP_006022 | T | A | TA | benign            |
| rs2839245 | NP_006022 | L | P | LP | possibly damaging |
| rs2839256 | NP_006022 | A | T | AT | benign            |
| rs2839421 | NP_950251 | V | A | VA | benign            |
| rs2839500 | NP_115781 | I | V | IV | benign            |
| rs2839500 | NP_115780 | I | V | IV | benign            |
| rs2839672 | NP_000809 | P | Q | PQ | probably damaging |
| rs2839673 | NP_000809 | G | E | GE | benign            |
| rs2839678 | NP_000809 | G | A | GA | possibly damaging |
| rs2839858 | NP_054644 | E | A | EA | benign            |
| rs2839858 | NP_000784 | E | A | EA | benign            |
| rs2839859 | NP_054644 | A | D | AD | possibly damaging |
| rs2839859 | NP_000784 | A | D | AD | possibly damaging |
| rs2840568 | NP_000690 | W | C | WC | probably damaging |
| rs2841280 | NP_620145 | E | Q | EQ | benign            |
| rs2842058 | NP_660310 | W | R | WR | probably damaging |
| rs2842536 | NP_056386 | A | P | AP | benign            |
| rs2842726 | NP_076427 | P | S | PS | possibly damaging |
| rs2843414 | NP_115288 | I | V | IV | benign            |
| rs2843414 | NP_002472 | I | V | IV | benign            |
| rs2843493 | NP_056372 | S | P | SP | benign            |
| rs2844426 | NP_031363 | L | M | LM | benign            |
| rs2844426 | NP_005097 | L | M | LM | benign            |
| rs2844427 | NP_031363 | L | I | LI | benign            |
| rs2844427 | NP_005097 | L | I | LI | benign            |
| rs2844491 | NP_004629 | G | A | GA | possibly damaging |
| rs2844491 | NP_542417 | G | A | GA | possibly damaging |
| rs2844707 | XP_376479 | S | A | SA | benign            |
| rs2844818 | NP_002107 | V | M | VM | benign            |
| rs2844887 | XP_066243 | P | S | PS | benign            |
| rs2844888 | XP_066243 | P | L | PL | benign            |
| rs2845497 | XP_371430 | R | H | RH | possibly damaging |
| rs2845703 | NP_478100 | A | P | AP | benign            |
| rs2845703 | NP_036233 | A | P | AP | benign            |
| rs2845704 | NP_478100 | A | G | AG | benign            |
| rs2845704 | NP_036233 | A | G | AG | benign            |
| rs2846004 | XP_496769 | R | C | RC | possibly damaging |
| rs2846260 | XP_061880 | Y | H | YH | benign            |
| rs2846275 | XP_061880 | K | N | KN | benign            |



|           |           |   |   |    |                   |
|-----------|-----------|---|---|----|-------------------|
| rs2846412 | NP_055880 | N | S | NS | benign            |
| rs2846707 | NP_071405 | V | M | VM | possibly damaging |
| rs2847092 | NP_005397 | Q | E | QE | benign            |
| rs2847146 | NP_689565 | E | K | EK | benign            |
| rs2847620 | NP_059982 | Y | S | YS | probably damaging |
| rs2847620 | NP_974487 | Y | S | YS | probably damaging |
| rs2848706 | NP_001935 | R | K | RK | benign            |
| rs2848984 | NP_536739 | P | H | PH | possibly damaging |
| rs2849233 | NP_114145 | A | T | AT | benign            |
| rs2850196 | XP_061880 | G | V | GV | probably damaging |
| rs2851557 | NP_004467 | P | S | PS | benign            |
| rs2852003 | NP_001932 | D | A | DA | benign            |
| rs2852003 | NP_077741 | D | A | DA | possibly damaging |
| rs2852413 | XP_372400 | I | M | IM | benign            |
| rs2852414 | XP_372400 | R | T | RT | benign            |
| rs2852415 | XP_372400 | I | T | IT | benign            |
| rs2852416 | XP_372400 | T | N | TN | benign            |
| rs2852464 | NP_002273 | I | M | IM | possibly damaging |
| rs2852470 | NP_002274 | W | G | WG | probably damaging |
| rs2852471 | NP_002274 | W | L | WL | probably damaging |
| rs2853217 | NP_075556 | A | P | AP | benign            |
| rs2853344 | NP_002408 | V | A | VA | benign            |
| rs2853345 | NP_002408 | W | L | WL | probably damaging |
| rs2853658 | NP_057596 | R | Q | RQ | benign            |
| rs2853699 | NP_005192 | A | G | AG | benign            |
| rs2853778 | NP_001924 | R | T | RT | probably damaging |
| rs2853897 | NP_002990 | R | K | RK | benign            |
| rs2853898 | NP_002990 | S | N | SN | benign            |
| rs2854168 | NP_072166 | R | K | RK | benign            |
| rs2854168 | NP_001308 | R | K | RK | benign            |
| rs2854169 | NP_072166 | S | W | SW | possibly damaging |
| rs2854169 | NP_001308 | S | W | SW | probably damaging |
| rs2854173 | NP_072166 | F | C | FC | possibly damaging |
| rs2854389 | NP_000085 | A | E | AE | benign            |
| rs2854482 | NP_995317 | F | Y | FY | benign            |
| rs2854486 | NP_995317 | V | A | VA | benign            |
| rs2854581 | NP_000287 | S | T | ST | benign            |
| rs2854584 | NP_000287 | G | A | GA | possibly damaging |
| rs2854585 | NP_000287 | Q | H | QH | possibly damaging |
| rs2854586 | NP_000287 | Q | H | QH | benign            |
| rs2854617 | NP_000287 | A | T | AT | benign            |
| rs2854618 | NP_000287 | V | M | VM | benign            |
| rs2854624 | NP_000287 | P | A | PA | probably damaging |
| rs2854650 | NP_005128 | S | P | SP | benign            |
| rs2854709 | NP_000026 | E | D | ED | benign            |
| rs2854737 | NP_000410 | P | A | PA | probably damaging |

|           |           |   |   |    |                   |
|-----------|-----------|---|---|----|-------------------|
| rs2854746 | NP_000589 | G | A | GA | benign            |
| rs2854909 | NP_006518 | A | V | AV | benign            |
| rs2855009 | NP_000350 | V | I | VI | benign            |
| rs2855111 | NP_000350 | D | E | DE | benign            |
| rs2855335 | NP_000287 | P | A | PA | benign            |
| rs2855336 | NP_000287 | A | P | AP | probably damaging |
| rs2855337 | NP_000287 | A | T | AT | benign            |
| rs2855341 | NP_000287 | V | M | VM | benign            |
| rs2855342 | NP_000287 | Q | R | QR | benign            |
| rs2855347 | NP_000287 | A | G | AG | benign            |
| rs2855348 | NP_000287 | L | M | LM | benign            |
| rs2855350 | NP_000287 | T | N | TN | benign            |
| rs2855430 | NP_542410 | P | L | PL | benign            |
| rs2855430 | NP_542411 | P | L | PL | benign            |
| rs2855430 | NP_542412 | P | L | PL | benign            |
| rs2855480 | NP_115564 | D | N | DN | benign            |
| rs2855495 | NP_002961 | K | E | KE | benign            |
| rs2855505 | NP_542410 | A | P | AP | benign            |
| rs2855505 | NP_542411 | A | P | AP | benign            |
| rs2855505 | NP_542412 | A | P | AP | benign            |
| rs2855586 | NP_001657 | E | K | EK | benign            |
| rs2855677 | XP_497524 | Y | H | YH | benign            |
| rs2855762 | NP_958786 | E | Q | EQ | benign            |
| rs2855762 | NP_958785 | E | Q | EQ | benign            |
| rs2855762 | NP_958784 | E | Q | EQ | benign            |
| rs2855762 | NP_958783 | E | Q | EQ | benign            |
| rs2855762 | NP_958782 | E | Q | EQ | benign            |
| rs2855762 | NP_958781 | E | Q | EQ | benign            |
| rs2855762 | NP_958780 | E | Q | EQ | benign            |
| rs2855762 | NP_000436 | E | Q | EQ | benign            |
| rs2855763 | NP_958786 | A | P | AP | benign            |
| rs2855763 | NP_958785 | A | P | AP | benign            |
| rs2855763 | NP_958784 | A | P | AP | benign            |
| rs2855763 | NP_958783 | A | P | AP | benign            |
| rs2855763 | NP_958782 | A | P | AP | benign            |
| rs2855763 | NP_958781 | A | P | AP | benign            |
| rs2855763 | NP_958780 | A | P | AP | benign            |
| rs2855763 | NP_000436 | A | P | AP | benign            |
| rs2855764 | NP_958786 | K | N | KN | benign            |
| rs2855764 | NP_958785 | K | N | KN | benign            |
| rs2855764 | NP_958784 | K | N | KN | benign            |
| rs2855764 | NP_958783 | K | N | KN | benign            |
| rs2855764 | NP_958782 | K | N | KN | benign            |
| rs2855764 | NP_958781 | K | N | KN | benign            |
| rs2855764 | NP_958780 | K | N | KN | benign            |
| rs2855764 | NP_000436 | K | N | KN | benign            |

|           |           |   |   |    |                   |
|-----------|-----------|---|---|----|-------------------|
| rs2856347 | NP_000834 | S | F | SF | possibly damaging |
| rs2856383 | NP_068822 | G | A | GA | benign            |
| rs2856383 | NP_068819 | A | G | AG | possibly damaging |
| rs2856383 | NP_004952 | G | A | GA | possibly damaging |
| rs2856383 | NP_068830 | G | A | GA | possibly damaging |
| rs2856386 | NP_068822 | F | L | FL | benign            |
| rs2856386 | NP_004952 | F | L | FL | possibly damaging |
| rs2856386 | NP_068830 | F | L | FL | possibly damaging |
| rs2856386 | NP_068819 | L | F | LF | possibly damaging |
| rs2856398 | XP_377136 | P | T | PT | possibly damaging |
| rs2856444 | NP_061978 | A | E | AE | benign            |
| rs2856446 | NP_061978 | D | V | DV | benign            |
| rs2856447 | NP_061978 | D | E | DE | benign            |
| rs2856453 | NP_115859 | V | I | VI | benign            |
| rs2856454 | NP_115859 | N | T | NT | benign            |
| rs2856456 | NP_115859 | M | I | MI | benign            |
| rs2856655 | NP_000247 | Q | R | QR | possibly damaging |
| rs2856748 | NP_005174 | A | G | AG | benign            |
| rs2856749 | NP_005174 | E | V | EV | possibly damaging |
| rs2856833 | NP_000490 | F | L | FL | possibly damaging |
| rs2856848 | NP_001996 | L | V | LV | benign            |
| rs2856966 | NP_001108 | G | D | GD | benign            |
| rs2857007 | NP_061978 | C | R | CR | probably damaging |
| rs2857010 | NP_061978 | R | S | RS | benign            |
| rs2857042 | NP_002408 | T | R | TR | benign            |
| rs2857465 | NP_001118 | T | A | TA | benign            |
| rs2857465 | NP_663782 | T | A | TA | benign            |
| rs2857543 | NP_000247 | E | D | ED | benign            |
| rs2857663 | NP_002273 | C | R | CR | possibly damaging |
| rs2857703 | NP_004629 | G | A | GA | possibly damaging |
| rs2857703 | NP_542417 | G | A | GA | possibly damaging |
| rs2857713 | NP_000586 | C | R | CR | benign            |
| rs2857766 | NP_002424 | V | L | VL | benign            |
| rs2857766 | NP_996533 | V | L | VL | benign            |
| rs2857766 | NP_996532 | V | L | VL | benign            |
| rs2857804 | NP_958786 | L | F | LF | benign            |
| rs2857804 | NP_958785 | L | F | LF | benign            |
| rs2857804 | NP_958784 | L | F | LF | benign            |
| rs2857804 | NP_958783 | L | F | LF | benign            |
| rs2857804 | NP_958782 | L | F | LF | benign            |
| rs2857804 | NP_958781 | L | F | LF | benign            |
| rs2857804 | NP_958780 | L | F | LF | benign            |
| rs2857804 | NP_000436 | L | F | LF | benign            |
| rs2857808 | NP_958786 | A | S | AS | benign            |
| rs2857808 | NP_958785 | A | S | AS | benign            |
| rs2857808 | NP_958784 | A | S | AS | benign            |

|           |           |   |   |    |        |
|-----------|-----------|---|---|----|--------|
| rs2857808 | NP_958783 | A | S | AS | benign |
| rs2857808 | NP_958782 | A | S | AS | benign |
| rs2857808 | NP_958781 | A | S | AS | benign |
| rs2857808 | NP_958780 | A | S | AS | benign |
| rs2857808 | NP_000436 | A | S | AS | benign |
| rs2857809 | NP_958786 | A | G | AG | benign |
| rs2857809 | NP_958785 | A | G | AG | benign |
| rs2857809 | NP_958784 | A | G | AG | benign |
| rs2857809 | NP_958783 | A | G | AG | benign |
| rs2857809 | NP_958782 | A | G | AG | benign |
| rs2857809 | NP_958781 | A | G | AG | benign |
| rs2857809 | NP_958780 | A | G | AG | benign |
| rs2857809 | NP_000436 | A | G | AG | benign |
| rs2857812 | NP_958786 | A | V | AV | benign |
| rs2857812 | NP_958785 | A | V | AV | benign |
| rs2857812 | NP_958784 | A | V | AV | benign |
| rs2857812 | NP_958783 | A | V | AV | benign |
| rs2857812 | NP_958782 | A | V | AV | benign |
| rs2857812 | NP_958781 | A | V | AV | benign |
| rs2857812 | NP_958780 | A | V | AV | benign |
| rs2857812 | NP_000436 | A | V | AV | benign |
| rs2857813 | NP_958786 | A | G | AG | benign |
| rs2857813 | NP_958785 | A | G | AG | benign |
| rs2857813 | NP_958784 | A | G | AG | benign |
| rs2857813 | NP_958783 | A | G | AG | benign |
| rs2857813 | NP_958782 | A | G | AG | benign |
| rs2857813 | NP_958781 | A | G | AG | benign |
| rs2857813 | NP_958780 | A | G | AG | benign |
| rs2857813 | NP_000436 | A | G | AG | benign |
| rs2857816 | NP_958786 | R | K | RK | benign |
| rs2857816 | NP_958785 | R | K | RK | benign |
| rs2857816 | NP_958784 | R | K | RK | benign |
| rs2857816 | NP_958783 | R | K | RK | benign |
| rs2857816 | NP_958782 | R | K | RK | benign |
| rs2857816 | NP_958781 | R | K | RK | benign |
| rs2857816 | NP_958780 | R | K | RK | benign |
| rs2857816 | NP_000436 | R | K | RK | benign |
| rs2857817 | NP_958786 | R | K | RK | benign |
| rs2857817 | NP_958785 | R | K | RK | benign |
| rs2857817 | NP_958784 | R | K | RK | benign |
| rs2857817 | NP_958783 | R | K | RK | benign |
| rs2857817 | NP_958782 | R | K | RK | benign |
| rs2857817 | NP_958781 | R | K | RK | benign |
| rs2857817 | NP_958780 | R | K | RK | benign |
| rs2857817 | NP_000436 | R | K | RK | benign |
| rs2857821 | NP_958786 | F | L | FL | benign |

|           |           |   |   |    |                   |
|-----------|-----------|---|---|----|-------------------|
| rs2857821 | NP_958785 | F | L | FL | benign            |
| rs2857821 | NP_958784 | F | L | FL | benign            |
| rs2857821 | NP_958783 | F | L | FL | benign            |
| rs2857821 | NP_958782 | F | L | FL | benign            |
| rs2857821 | NP_958781 | F | L | FL | benign            |
| rs2857821 | NP_958780 | F | L | FL | benign            |
| rs2857821 | NP_000436 | F | L | FL | benign            |
| rs2857822 | NP_958786 | M | I | MI | benign            |
| rs2857822 | NP_958785 | M | I | MI | benign            |
| rs2857822 | NP_958784 | M | I | MI | benign            |
| rs2857822 | NP_958783 | M | I | MI | benign            |
| rs2857822 | NP_958782 | M | I | MI | benign            |
| rs2857822 | NP_958781 | M | I | MI | benign            |
| rs2857822 | NP_958780 | M | I | MI | benign            |
| rs2857822 | NP_000436 | M | I | MI | benign            |
| rs2857823 | NP_958786 | A | T | AT | benign            |
| rs2857823 | NP_958785 | A | T | AT | benign            |
| rs2857823 | NP_958784 | A | T | AT | benign            |
| rs2857823 | NP_958783 | A | T | AT | benign            |
| rs2857823 | NP_958782 | A | T | AT | benign            |
| rs2857823 | NP_958781 | A | T | AT | benign            |
| rs2857823 | NP_958780 | A | T | AT | benign            |
| rs2857823 | NP_000436 | A | T | AT | benign            |
| rs2857824 | NP_958786 | R | C | RC | possibly damaging |
| rs2857824 | NP_958785 | R | C | RC | possibly damaging |
| rs2857824 | NP_958784 | R | C | RC | possibly damaging |
| rs2857824 | NP_958783 | R | C | RC | possibly damaging |
| rs2857824 | NP_958782 | R | C | RC | possibly damaging |
| rs2857824 | NP_958781 | R | C | RC | possibly damaging |
| rs2857824 | NP_958780 | R | C | RC | possibly damaging |
| rs2857824 | NP_000436 | R | C | RC | possibly damaging |
| rs2857827 | NP_958786 | R | K | RK | benign            |
| rs2857827 | NP_958785 | R | K | RK | benign            |
| rs2857827 | NP_958784 | R | K | RK | benign            |
| rs2857827 | NP_958783 | R | K | RK | benign            |
| rs2857827 | NP_958782 | R | K | RK | benign            |
| rs2857827 | NP_958781 | R | K | RK | benign            |
| rs2857827 | NP_958780 | R | K | RK | benign            |
| rs2857827 | NP_000436 | R | K | RK | benign            |
| rs2857831 | NP_958786 | Q | R | QR | benign            |
| rs2857831 | NP_958785 | Q | R | QR | benign            |
| rs2857831 | NP_958784 | Q | R | QR | benign            |
| rs2857831 | NP_958783 | Q | R | QR | benign            |
| rs2857831 | NP_958782 | Q | R | QR | benign            |
| rs2857831 | NP_958781 | Q | R | QR | benign            |
| rs2857831 | NP_958780 | Q | R | QR | benign            |

|           |           |   |   |    |                   |
|-----------|-----------|---|---|----|-------------------|
| rs2857831 | NP_000436 | Q | R | QR | benign            |
| rs2857832 | NP_958786 | S | A | SA | benign            |
| rs2857832 | NP_958785 | S | A | SA | benign            |
| rs2857832 | NP_958784 | S | A | SA | benign            |
| rs2857832 | NP_958783 | S | A | SA | benign            |
| rs2857832 | NP_958782 | S | A | SA | benign            |
| rs2857832 | NP_958781 | S | A | SA | benign            |
| rs2857832 | NP_958780 | S | A | SA | benign            |
| rs2857832 | NP_000436 | S | A | SA | benign            |
| rs2857833 | NP_958786 | K | E | KE | benign            |
| rs2857833 | NP_958785 | K | E | KE | benign            |
| rs2857833 | NP_958784 | K | E | KE | benign            |
| rs2857833 | NP_958783 | K | E | KE | benign            |
| rs2857833 | NP_958782 | K | E | KE | benign            |
| rs2857833 | NP_958781 | K | E | KE | benign            |
| rs2857833 | NP_958780 | K | E | KE | benign            |
| rs2857833 | NP_000436 | K | E | KE | benign            |
| rs2857834 | NP_958786 | A | E | AE | benign            |
| rs2857834 | NP_958785 | A | E | AE | benign            |
| rs2857834 | NP_958784 | A | E | AE | benign            |
| rs2857834 | NP_958783 | A | E | AE | benign            |
| rs2857834 | NP_958782 | A | E | AE | benign            |
| rs2857834 | NP_958781 | A | E | AE | benign            |
| rs2857834 | NP_958780 | A | E | AE | benign            |
| rs2857834 | NP_000436 | A | E | AE | benign            |
| rs2857836 | NP_001657 | S | L | SL | benign            |
| rs2858039 | XP_035572 | C | F | CF | possibly damaging |
| rs2859787 | NP_000287 | R | G | RG | probably damaging |
| rs2859834 | NP_002349 | L | M | LM | benign            |
| rs2860036 | NP_667345 | P | S | PS | possibly damaging |
| rs2860036 | NP_002495 | P | S | PS | possibly damaging |
| rs2860036 | NP_667344 | P | S | PS | possibly damaging |
| rs2860112 | NP_006652 | D | N | DN | benign            |
| rs2860677 | NP_061993 | I | V | IV | benign            |
| rs2860677 | NP_061756 | V | I | VI | benign            |
| rs2860678 | NP_061993 | A | T | AT | benign            |
| rs2860678 | NP_061756 | T | A | TA | benign            |
| rs2861397 | NP_115708 | C | S | CS | probably damaging |
| rs2861398 | NP_115708 | C | R | CR | probably damaging |
| rs2861508 | XP_498210 | K | E | KE | benign            |
| rs2861729 | NP_055747 | E | A | EA | possibly damaging |
| rs2861949 | NP_002620 | F | L | FL | probably damaging |
| rs2862768 | NP_005806 | E | G | EG | possibly damaging |
| rs2862934 | NP_006586 | G | S | GS | possibly damaging |
| rs2862954 | NP_006450 | I | V | IV | benign            |
| rs2863458 | NP_872429 | K | E | KE | benign            |

|           |           |   |   |    |                   |
|-----------|-----------|---|---|----|-------------------|
| rs2863712 | NP_066940 | W | G | WG | probably damaging |
| rs2863713 | NP_005447 | R | W | RW | possibly damaging |
| rs2865022 | XP_497958 | S | P | SP | benign            |
| rs2865023 | XP_497958 | T | M | TM | possibly damaging |
| rs2865024 | XP_497958 | N | S | NS | benign            |
| rs2865025 | XP_497958 | T | M | TM | benign            |
| rs2865026 | XP_497958 | Y | H | YH | benign            |
| rs2865027 | XP_497958 | S | F | SF | benign            |
| rs2865031 | XP_211908 | Q | E | QE | benign            |
| rs2865032 | XP_211908 | V | M | VM | benign            |
| rs2865033 | XP_211908 | V | G | VG | possibly damaging |
| rs2865034 | XP_211908 | G | R | GR | probably damaging |
| rs2865265 | NP_776256 | C | Y | CY | benign            |
| rs2865394 | NP_110403 | R | Q | RQ | benign            |
| rs2865519 | XP_372403 | T | A | TA | benign            |
| rs2865520 | XP_372403 | T | I | TI | possibly damaging |
| rs2866413 | NP_005899 | T | M | TM | possibly damaging |
| rs2867400 | XP_166917 | L | M | LM | benign            |
| rs2868458 | NP_689477 | P | R | PR | possibly damaging |
| rs2868617 | XP_496237 | K | E | KE | benign            |
| rs2868645 | NP_055613 | A | T | AT | benign            |
| rs2868646 | NP_055613 | T | M | TM | benign            |
| rs2869020 | XP_166878 | I | F | IF | benign            |
| rs2870128 | XP_496322 | I | T | IT | benign            |
| rs2870476 | NP_006201 | A | P | AP | benign            |
| rs2870983 | NP_057419 | A | T | AT | benign            |
| rs2870984 | NP_057419 | T | M | TM | possibly damaging |
| rs2870998 | NP_057419 | A | P | AP | benign            |
| rs2871000 | NP_057419 | T | A | TA | benign            |
| rs2872523 | NP_005620 | A | V | AV | benign            |
| rs2872524 | NP_005620 | V | M | VM | benign            |
| rs2872954 | NP_065143 | P | T | PT | benign            |
| rs2873587 | NP_112155 | H | R | HR | benign            |
| rs2873667 | XP_372500 | H | Q | HQ | possibly damaging |
| rs2874756 | XP_209910 | G | S | GS | benign            |
| rs2876098 | NP_995586 | E | A | EA | benign            |
| rs2876098 | NP_786887 | E | A | EA | benign            |
| rs2876714 | NP_066278 | V | I | VI | benign            |
| rs2876831 | XP_036729 | A | T | AT | benign            |
| rs2876960 | NP_003298 | E | K | EK | benign            |
| rs2877380 | NP_116172 | L | M | LM | benign            |
| rs2878067 | NP_958802 | Y | N | YN | probably damaging |
| rs2878067 | NP_963892 | Y | N | YN | probably damaging |
| rs2878322 | NP_116027 | H | P | HP | benign            |
| rs2879097 | XP_375449 | R | C | RC | possibly damaging |
| rs2879227 | NP_114400 | V | L | VL | benign            |

|           |           |   |   |    |                   |
|-----------|-----------|---|---|----|-------------------|
| rs2879227 | NP_061739 | V | L | VL | benign            |
| rs2879401 | NP_000141 | G | E | GE | benign            |
| rs2880572 | XP_496026 | T | K | TK | possibly damaging |
| rs2880956 | XP_370839 | G | E | GE | benign            |
| rs2880956 | XP_496096 | G | E | GE | benign            |
| rs2881308 | NP_004658 | L | P | LP | possibly damaging |
| rs2881418 | XP_371832 | I | F | IF | benign            |
| rs2881468 | NP_003613 | N | S | NS | benign            |
| rs2881468 | NP_803193 | N | S | NS | benign            |
| rs2882686 | XP_375085 | L | P | LP | possibly damaging |
| rs2883843 | XP_498241 | T | R | TR | possibly damaging |
| rs2884015 | NP_861421 | L | M | LM | benign            |
| rs2884554 | XP_496299 | K | R | KR | benign            |
| rs2884613 | XP_497652 | L | Q | LQ | benign            |
| rs2884614 | XP_497652 | C | Y | CY | possibly damaging |
| rs2884615 | XP_497652 | M | T | MT | benign            |
| rs2884673 | XP_372763 | E | K | EK | benign            |
| rs2886041 | XP_012219 | G | C | GC | probably damaging |
| rs2886059 | NP_036322 | V | F | VF | benign            |
| rs2886059 | NP_658989 | V | F | VF | benign            |
| rs2886143 | NP_002198 | K | Q | KQ | benign            |
| rs2886313 | NP_056952 | P | S | PS | benign            |
| rs2886313 | NP_055326 | P | S | PS | benign            |
| rs2886443 | NP_006608 | P | L | PL | possibly damaging |
| rs2887147 | NP_775489 | A | V | AV | benign            |
| rs2888020 | XP_168530 | K | Q | KQ | benign            |
| rs2888782 | NP_036581 | F | L | FL | benign            |
| rs2888805 | NP_003202 | V | M | VM | benign            |
| rs2889109 | NP_061720 | P | L | PL | probably damaging |
| rs2889732 | NP_872325 | N | T | NT | benign            |
| rs2890389 | XP_497067 | L | I | LI | benign            |
| rs2890565 | NP_068835 | S | N | SN | benign            |
| rs2890565 | NP_006777 | S | N | SN | benign            |
| rs2893084 | NP_062556 | T | A | TA | benign            |
| rs2893848 | NP_076923 | N | S | NS | benign            |
| rs2896399 | NP_060866 | C | R | CR | probably damaging |
| rs2896521 | NP_695023 | D | G | DG | possibly damaging |
| rs2896523 | NP_695023 | Q | H | QH | probably damaging |
| rs2896525 | NP_695023 | H | R | HR | benign            |
| rs2897598 | XP_372640 | T | M | TM | benign            |
| rs2897665 | XP_496593 | S | G | SG | benign            |
| rs2898095 | NP_001037 | S | T | ST | benign            |
| rs2898199 | NP_000810 | E | D | ED | benign            |
| rs2898323 | XP_372030 | R | G | RG | benign            |
| rs2898323 | XP_372028 | R | G | RG | benign            |
| rs2898842 | XP_370958 | P | L | PL | benign            |



|           |           |   |   |    |                   |
|-----------|-----------|---|---|----|-------------------|
| rs2898927 | XP_372420 | G | R | GR | benign            |
| rs2898928 | XP_372420 | G | R | GR | possibly damaging |
| rs2899151 | XP_496524 | Q | R | QR | benign            |
| rs2899294 | NP_057175 | L | I | LI | benign            |
| rs2899642 | NP_060080 | N | K | NK | benign            |
| rs2899849 | NP_057670 | H | L | HL | benign            |
| rs2900268 | NP_116188 | L | Q | LQ | possibly damaging |
| rs2900307 | XP_498338 | C | S | CS | benign            |
| rs2900373 | XP_210752 | E | D | ED | possibly damaging |
| rs2900692 | XP_377073 | G | R | GR | possibly damaging |
| rs2900692 | NP_878908 | G | R | GR | possibly damaging |
| rs2901166 | NP_722517 | A | G | AG | benign            |
| rs2901863 | NP_002389 | F | V | FV | probably damaging |
| rs2902545 | NP_066940 | D | Y | DY | probably damaging |
| rs2902546 | NP_005447 | R | L | RL | possibly damaging |
| rs2902911 | XP_497958 | V | L | VL | benign            |
| rs2903150 | NP_777612 | I | V | IV | benign            |
| rs2903250 | NP_689751 | T | P | TP | benign            |
| rs2903566 | XP_166917 | S | I | SI | probably damaging |
| rs2903808 | NP_542790 | A | V | AV | benign            |
| rs2904143 | NP_542415 | E | K | EK | benign            |
| rs2904143 | NP_542416 | E | K | EK | benign            |
| rs2904143 | NP_006255 | E | K | EK | benign            |
| rs2904143 | NP_542414 | E | K | EK | benign            |
| rs2904551 | NP_057419 | L | P | LP | possibly damaging |
| rs2904552 | NP_057419 | R | H | RH | possibly damaging |
| rs2904682 | NP_057437 | T | A | TA | benign            |
| rs2904880 | NP_001761 | V | L | VL | benign            |
| rs2904914 | NP_612405 | G | D | GD | possibly damaging |
| rs2904923 | NP_543029 | E | G | EG | benign            |
| rs2904923 | NP_954578 | E | G | EG | benign            |
| rs2904979 | XP_495881 | T | I | TI | benign            |
| rs2904982 | XP_495881 | V | F | VF | possibly damaging |
| rs2905469 | XP_496237 | R | H | RH | probably damaging |
| rs2905938 | NP_004658 | R | Q | RQ | benign            |
| rs2905939 | NP_004658 | P | L | PL | probably damaging |
| rs2906696 | XP_373180 | A | V | AV | benign            |
| rs2906696 | XP_498230 | V | A | VA | benign            |
| rs2906890 | NP_001073 | P | R | PR | possibly damaging |
| rs2906891 | NP_001073 | W | C | WC | probably damaging |
| rs2906997 | NP_009086 | M | V | MV | benign            |
| rs2906998 | NP_009086 | H | R | HR | benign            |
| rs2906999 | NP_009086 | S | P | SP | benign            |
| rs2907300 | NP_061758 | G | E | GE | benign            |
| rs2907323 | NP_061753 | T | R | TR | probably damaging |
| rs2907324 | NP_061753 | D | H | DH | benign            |

|           |           |   |   |    |                   |
|-----------|-----------|---|---|----|-------------------|
| rs2907373 | NP_060035 | S | L | SL | possibly damaging |
| rs2907471 | XP_496227 | H | R | HR | possibly damaging |
| rs2908004 | NP_057171 | G | R | GR | benign            |
| rs2908004 | NP_476509 | G | R | GR | possibly damaging |
| rs2908765 | XP_496500 | A | V | AV | benign            |
| rs2909097 | NP_116078 | A | S | AS | benign            |
| rs2909111 | NP_060229 | V | A | VA | benign            |
| rs2909148 | NP_872440 | L | P | LP | benign            |
| rs2909229 | NP_003881 | H | D | HD | probably damaging |
| rs2909888 | NP_006624 | E | K | EK | benign            |
| rs2910005 | NP_061756 | V | I | VI | benign            |
| rs2910006 | NP_061755 | K | E | KE | possibly damaging |
| rs2910313 | NP_061763 | V | L | VL | benign            |
| rs2910314 | NP_061763 | R | W | RW | probably damaging |
| rs2910327 | NP_061755 | T | I | TI | probably damaging |
| rs2910329 | NP_061756 | R | G | RG | benign            |
| rs2911085 | XP_496159 | S | G | SG | benign            |
| rs2911826 | NP_085911 | Q | E | QE | benign            |
| rs2912444 | NP_066002 | L | V | LV | benign            |
| rs2912695 | XP_496581 | N | D | ND | benign            |
| rs2913782 | NP_071916 | H | D | HD | possibly damaging |
| rs2913783 | NP_071916 | S | G | SG | benign            |
| rs2913955 | NP_940873 | T | A | TA | benign            |
| rs2914604 | NP_002308 | A | P | AP | benign            |
| rs2915791 | NP_714544 | V | F | VF | benign            |
| rs2915931 | XP_047550 | Q | R | QR | benign            |
| rs2915931 | XP_047554 | R | Q | RQ | benign            |
| rs2915960 | NP_000531 | A | V | AV | benign            |
| rs2915986 | NP_006728 | F | I | FI | benign            |
| rs2915987 | NP_006728 | Y | H | YH | benign            |
| rs2916003 | NP_055033 | G | D | GD | benign            |
| rs2916014 | NP_055033 | C | W | CW | probably damaging |
| rs2916014 | NP_055034 | C | W | CW | probably damaging |
| rs2916050 | NP_036446 | I | S | IS | benign            |
| rs2916115 | NP_060583 | D | E | DE | benign            |
| rs2916413 | NP_819056 | I | M | IM | benign            |
| rs2916414 | NP_819056 | D | E | DE | benign            |
| rs2916549 | XP_290660 | T | K | TK | possibly damaging |
| rs2917782 | NP_631910 | E | K | EK | benign            |
| rs2917862 | NP_598000 | M | T | MT | benign            |
| rs2918549 | XP_498938 | S | L | SL | benign            |
| rs2918640 | XP_496581 | G | D | GD | possibly damaging |
| rs2919157 | XP_496581 | V | I | VI | benign            |
| rs2919158 | XP_496581 | Q | R | QR | benign            |
| rs2919159 | XP_496581 | P | L | PL | probably damaging |
| rs2919168 | XP_496581 | K | E | KE | benign            |

|           |           |   |   |    |                   |
|-----------|-----------|---|---|----|-------------------|
| rs2919180 | XP_496581 | V | M | VM | benign            |
| rs2919181 | XP_496581 | L | W | LW | possibly damaging |
| rs2919358 | XP_372573 | A | V | AV | benign            |
| rs2919661 | NP_602310 | D | H | DH | possibly damaging |
| rs2919661 | NP_036547 | D | H | DH | possibly damaging |
| rs2920048 | NP_036214 | E | D | ED | benign            |
| rs2920217 | NP_660334 | Y | S | YS | possibly damaging |
| rs2920716 | XP_497936 | E | K | EK | benign            |
| rs2920780 | NP_714544 | H | R | HR | possibly damaging |
| rs2920791 | NP_714544 | L | F | LF | benign            |
| rs2921293 | NP_954714 | H | R | HR | benign            |
| rs2921563 | NP_861451 | R | H | RH | benign            |
| rs2922546 | NP_066021 | T | I | TI | benign            |
| rs2922828 | NP_078872 | A | T | AT | benign            |
| rs2923144 | NP_115645 | N | K | NK | possibly damaging |
| rs2923147 | NP_115645 | C | R | CR | benign            |
| rs2924765 | NP_919271 | V | A | VA | benign            |
| rs2925304 | NP_077816 | S | C | SC | benign            |
| rs2925741 | NP_060849 | K | T | KT | benign            |
| rs2925930 | NP_975011 | T | A | TA | benign            |
| rs2927007 | XP_496769 | H | Q | HQ | possibly damaging |
| rs2927007 | XP_376474 | Q | H | QH | possibly damaging |
| rs2927014 | XP_496770 | T | P | TP | benign            |
| rs2929155 | NP_055087 | G | S | GS | benign            |
| rs2929156 | NP_055087 | A | P | AP | benign            |
| rs2929158 | NP_055087 | V | A | VA | benign            |
| rs2929366 | NP_653316 | I | T | IT | benign            |
| rs2929516 | NP_008832 | T | I | TI | benign            |
| rs2930202 | XP_374985 | E | Q | EQ | benign            |
| rs2930509 | XP_377797 | G | D | GD | probably damaging |
| rs2930562 | NP_665808 | H | R | HR | probably damaging |
| rs2930761 | XP_496496 | P | L | PL | possibly damaging |
| rs2930861 | NP_037452 | I | V | IV | benign            |
| rs2931403 | NP_653316 | I | V | IV | benign            |
| rs2932545 | NP_057532 | E | A | EA | benign            |
| rs2933093 | XP_291625 | M | I | MI | benign            |
| rs2933093 | XP_291638 | M | I | MI | benign            |
| rs2933095 | XP_291625 | T | I | TI | benign            |
| rs2933095 | XP_291638 | T | I | TI | benign            |
| rs2934043 | XP_496034 | G | S | GS | benign            |
| rs2934043 | XP_496046 | G | S | GS | benign            |
| rs2934461 | XP_496134 | L | P | LP | possibly damaging |
| rs2935017 | NP_002191 | Q | R | QR | benign            |
| rs2935017 | NP_116032 | Q | R | QR | benign            |
| rs2935161 | XP_372563 | R | G | RG | probably damaging |
| rs2935264 | XP_496868 | P | L | PL | probably damaging |

|           |           |   |   |    |                   |
|-----------|-----------|---|---|----|-------------------|
| rs2935840 | XP_498818 | R | K | RK | benign            |
| rs2935858 | XP_034717 | I | T | IT | benign            |
| rs2936051 | XP_496436 | E | G | EG | benign            |
| rs2936051 | XP_371369 | E | G | EG | benign            |
| rs2936052 | XP_496436 | K | R | KR | benign            |
| rs2936052 | XP_371369 | K | R | KR | benign            |
| rs2936053 | XP_371369 | K | E | KE | benign            |
| rs2936817 | XP_046264 | H | Y | HY | benign            |
| rs2937026 | NP_036258 | T | A | TA | benign            |
| rs2937026 | NP_078809 | T | A | TA | benign            |
| rs2938229 | XP_498277 | H | R | HR | benign            |
| rs2938404 | XP_372563 | P | S | PS | possibly damaging |
| rs2938404 | XP_372565 | P | S | PS | possibly damaging |
| rs2939283 | XP_496692 | D | E | DE | benign            |
| rs2939587 | NP_510883 | R | L | RL | possibly damaging |
| rs2939587 | NP_079417 | R | L | RL | possibly damaging |
| rs2940315 | XP_059074 | L | F | LF | benign            |
| rs2941256 | NP_060897 | I | M | IM | benign            |
| rs2941679 | NP_859063 | L | V | LV | benign            |
| rs2941962 | XP_496239 | Q | H | QH | benign            |
| rs2942194 | NP_061049 | I | V | IV | benign            |
| rs2942402 | NP_112224 | S | G | SG | benign            |
| rs2942671 | NP_776173 | R | G | RG | probably damaging |
| rs2942672 | NP_776173 | R | W | RW | probably damaging |
| rs2943085 | XP_497472 | Q | E | QE | benign            |
| rs2943336 | XP_056254 | Q | R | QR | benign            |
| rs2943416 | NP_057404 | S | F | SF | possibly damaging |
| rs2943625 | NP_714923 | D | H | DH | possibly damaging |
| rs2943855 | XP_496559 | I | M | IM | benign            |
| rs2943892 | XP_496559 | S | R | SR | benign            |
| rs2943894 | XP_496581 | Q | R | QR | benign            |
| rs2944550 | NP_073153 | E | K | EK | benign            |
| rs2945249 | XP_496963 | R | Q | RQ | benign            |
| rs2945252 | XP_496963 | G | V | GV | probably damaging |
| rs2945477 | XP_496239 | T | N | TN | benign            |
| rs2946190 | XP_496692 | A | T | AT | benign            |
| rs2946994 | NP_073713 | E | Q | EQ | benign            |
| rs2947976 | XP_498204 | T | A | TA | benign            |
| rs2948282 | XP_376756 | A | V | AV | benign            |
| rs2948282 | XP_496962 | A | V | AV | benign            |
| rs2948386 | XP_376681 | Y | H | YH | benign            |
| rs2949097 | NP_060734 | R | H | RH | benign            |
| rs2949832 | XP_496869 | Y | C | YC | probably damaging |
| rs2950178 | XP_498230 | D | G | DG | benign            |
| rs2950178 | XP_373180 | G | D | GD | possibly damaging |
| rs2950354 | XP_374836 | S | L | SL | benign            |

|           |           |   |   |    |                   |
|-----------|-----------|---|---|----|-------------------|
| rs2950543 | XP_209429 | S | F | SF | benign            |
| rs2950724 | XP_496576 | K | E | KE | benign            |
| rs2950726 | XP_496576 | E | Q | EQ | benign            |
| rs2950844 | NP_061993 | Q | E | QE | benign            |
| rs2950845 | NP_061993 | N | K | NK | possibly damaging |
| rs2951236 | XP_496581 | P | A | PA | possibly damaging |
| rs2951622 | XP_496692 | V | F | VF | benign            |
| rs2953555 | NP_009201 | R | H | RH | possibly damaging |
| rs2953556 | NP_009201 | N | S | NS | benign            |
| rs2953564 | NP_009201 | V | A | VA | benign            |
| rs2954480 | XP_372097 | C | W | CW | probably damaging |
| rs2954579 | XP_496026 | L | P | LP | probably damaging |
| rs2954580 | XP_496026 | Q | H | QH | possibly damaging |
| rs2954587 | XP_375150 | E | K | EK | benign            |
| rs2954730 | NP_006531 | V | L | VL | benign            |
| rs2955190 | XP_497279 | V | L | VL | benign            |
| rs2955365 | NP_057323 | A | T | AT | benign            |
| rs2955367 | NP_057323 | W | G | WG | probably damaging |
| rs2956139 | XP_495878 | G | S | GS | benign            |
| rs2956723 | NP_075593 | L | V | LV | benign            |
| rs2956723 | NP_075594 | L | V | LV | benign            |
| rs2956723 | NP_075599 | L | V | LV | benign            |
| rs2956723 | NP_056934 | L | V | LV | benign            |
| rs2956723 | NP_000595 | L | V | LV | benign            |
| rs2957159 | XP_290516 | A | S | AS | benign            |
| rs2957221 | NP_057263 | E | K | EK | benign            |
| rs2957299 | XP_496227 | W | R | WR | possibly damaging |
| rs2957302 | XP_496227 | V | A | VA | benign            |
| rs2957309 | XP_496227 | A | S | AS | benign            |
| rs2957516 | NP_078938 | H | Y | HY | probably damaging |
| rs2957819 | XP_047554 | L | I | LI | possibly damaging |
| rs2958720 | NP_004127 | L | V | LV | benign            |
| rs2958978 | NP_919271 | H | R | HR | benign            |
| rs2958979 | NP_919271 | L | V | LV | benign            |
| rs2959656 | NP_570711 | A | T | AT | benign            |
| rs2959656 | NP_570716 | A | T | AT | benign            |
| rs2959896 | NP_003095 | E | D | ED | benign            |
| rs2959910 | NP_002645 | R | P | RP | probably damaging |
| rs2959910 | NP_872270 | R | P | RP | probably damaging |
| rs2959910 | NP_872271 | R | P | RP | probably damaging |
| rs2959953 | XP_371057 | P | R | PR | possibly damaging |
| rs2960306 | NP_005298 | R | L | RL | benign            |
| rs2960306 | NP_892027 | R | L | RL | benign            |
| rs2960546 | NP_071347 | P | R | PR | possibly damaging |
| rs2960754 | NP_004659 | A | S | AS | benign            |
| rs2960999 | XP_496891 | R | W | RW | probably damaging |

|           |           |   |   |    |                   |
|-----------|-----------|---|---|----|-------------------|
| rs2961135 | XP_373210 | A | P | AP | probably damaging |
| rs2961144 | XP_069619 | I | V | IV | benign            |
| rs2961149 | XP_498253 | F | L | FL | benign            |
| rs2961160 | XP_069616 | S | I | SI | benign            |
| rs2961161 | XP_069616 | S | R | SR | benign            |
| rs2961663 | NP_071916 | G | S | GS | benign            |
| rs2961665 | NP_071916 | E | D | ED | benign            |
| rs2961944 | NP_006416 | M | T | MT | benign            |
| rs2962297 | XP_498029 | W | R | WR | possibly damaging |
| rs2962525 | NP_689763 | R | W | RW | possibly damaging |
| rs2963620 | XP_496769 | D | A | DA | benign            |
| rs2963622 | XP_496770 | D | N | DN | benign            |
| rs2963622 | XP_376416 | N | D | ND | benign            |
| rs2964834 | XP_208333 | Y | H | YH | benign            |
| rs2965127 | NP_036248 | L | V | LV | benign            |
| rs2966183 | NP_060897 | C | F | CF | probably damaging |
| rs2966256 | XP_370968 | S | G | SG | benign            |
| rs2966332 | NP_116117 | M | T | MT | benign            |
| rs2966879 | NP_056952 | C | S | CS | benign            |
| rs2966879 | NP_055326 | C | S | CS | benign            |
| rs2966952 | NP_076996 | K | R | KR | benign            |
| rs2967596 | NP_115528 | D | E | DE | benign            |
| rs2968042 | XP_497613 | L | R | LR | benign            |
| rs2968557 | NP_443085 | S | P | SP | benign            |
| rs2968558 | NP_443085 | S | G | SG | benign            |
| rs2969802 | NP_003581 | D | H | DH | benign            |
| rs2969930 | XP_371116 | C | W | CW | probably damaging |
| rs2970165 | XP_209597 | K | E | KE | benign            |
| rs2970206 | XP_374252 | G | R | GR | possibly damaging |
| rs2971409 | NP_003898 | N | T | NT | benign            |
| rs2971410 | NP_003898 | E | K | EK | benign            |
| rs2971415 | NP_003898 | K | E | KE | benign            |
| rs2971485 | NP_776173 | F | C | FC | benign            |
| rs2971501 | NP_776173 | R | I | RI | probably damaging |
| rs2972810 | XP_498639 | R | K | RK | benign            |
| rs2973275 | NP_060772 | A | T | AT | benign            |
| rs2973558 | XP_371755 | H | N | HN | possibly damaging |
| rs2973566 | XP_371755 | R | K | RK | benign            |
| rs2973571 | XP_371755 | S | L | SL | benign            |
| rs2974290 | NP_741996 | D | N | DN | benign            |
| rs2974446 | NP_072044 | Q | P | QP | benign            |
| rs2974446 | NP_003392 | Q | P | QP | benign            |
| rs2974446 | NP_071801 | Q | P | QP | benign            |
| rs2974617 | NP_061170 | N | D | ND | benign            |
| rs2974747 | NP_060778 | S | R | SR | benign            |
| rs2974938 | NP_002702 | H | L | HL | possibly damaging |

|           |           |   |   |    |                   |
|-----------|-----------|---|---|----|-------------------|
| rs2974942 | NP_002702 | M | V | MV | benign            |
| rs2974944 | NP_002702 | K | N | KN | benign            |
| rs2975162 | NP_003132 | G | R | GR | benign            |
| rs2975311 | NP_066405 | L | F | LF | benign            |
| rs2975547 | NP_055033 | E | V | EV | probably damaging |
| rs2975547 | NP_055034 | E | V | EV | probably damaging |
| rs2975548 | NP_055033 | E | D | ED | possibly damaging |
| rs2975548 | NP_055034 | E | D | ED | possibly damaging |
| rs2975634 | NP_006083 | R | H | RH | benign            |
| rs2975765 | NP_075572 | A | V | AV | benign            |
| rs2975765 | NP_075574 | A | V | AV | benign            |
| rs2975765 | NP_075571 | A | V | AV | benign            |
| rs2975766 | NP_067074 | V | I | VI | benign            |
| rs2975766 | NP_075571 | V | I | VI | benign            |
| rs2975795 | NP_060696 | E | V | EV | benign            |
| rs2976120 | XP_497936 | E | K | EK | benign            |
| rs2976189 | NP_620172 | M | V | MV | benign            |
| rs2976230 | NP_002199 | A | V | AV | benign            |
| rs2976867 | XP_291277 | S | F | SF | benign            |
| rs2976962 | XP_291277 | A | G | AG | benign            |
| rs2977020 | NP_653252 | V | M | VM | benign            |
| rs2977838 | NP_570901 | R | W | RW | possibly damaging |
| rs2978180 | NP_056996 | D | N | DN | benign            |
| rs2978277 | NP_002086 | K | R | KR | benign            |
| rs2978422 | NP_056986 | V | F | VF | benign            |
| rs2979080 | NP_003407 | K | R | KR | benign            |
| rs2979093 | NP_085057 | V | F | VF | benign            |
| rs2979129 | XP_291277 | R | C | RC | possibly damaging |
| rs2980618 | NP_116258 | V | I | VI | benign            |
| rs2980619 | NP_116258 | F | L | FL | possibly damaging |
| rs2980959 | XP_498268 | Y | C | YC | probably damaging |
| rs2981374 | NP_001623 | P | R | PR | probably damaging |
| rs2981482 | NP_078904 | R | Q | RQ | benign            |
| rs2981545 | XP_087386 | E | K | EK | benign            |
| rs2981546 | XP_087386 | S | P | SP | benign            |
| rs2981599 | NP_004212 | D | G | DG | possibly damaging |
| rs2982092 | XP_291395 | D | V | DV | probably damaging |
| rs2982185 | XP_496343 | T | A | TA | possibly damaging |
| rs2982185 | XP_496345 | T | A | TA | possibly damaging |
| rs2982215 | NP_075390 | P | L | PL | probably damaging |
| rs2982225 | XP_496344 | A | V | AV | benign            |
| rs2982320 | NP_065112 | P | A | PA | benign            |
| rs2982486 | XP_372768 | M | K | MK | benign            |
| rs2982534 | NP_957704 | F | V | FV | benign            |
| rs2983388 | XP_379639 | G | R | GR | possibly damaging |
| rs2983388 | XP_499140 | G | R | GR | possibly damaging |

|           |              |   |   |    |                   |
|-----------|--------------|---|---|----|-------------------|
| rs2983592 | NP_115793    | K | E | KE | benign            |
| rs2984134 | NP_001814    | E | D | ED | benign            |
| rs2984165 | NP_055327    | P | L | PL | benign            |
| rs2985131 | NP_066278    | W | G | WG | possibly damaging |
| rs2986017 | NP_001001412 | P | L | PL | benign            |
| rs2987346 | XP_166270    | D | G | DG | possibly damaging |
| rs2987927 | XP_059095    | R | H | RH | possibly damaging |
| rs2987928 | XP_059095    | R | Q | RQ | possibly damaging |
| rs2988287 | NP_113663    | M | T | MT | benign            |
| rs2988341 | NP_710163    | N | S | NS | benign            |
| rs2988341 | NP_004467    | S | N | SN | benign            |
| rs2988342 | NP_004467    | V | L | VL | benign            |
| rs2988881 | XP_379639    | N | S | NS | benign            |
| rs2988881 | XP_499140    | S | N | SN | benign            |
| rs2989088 | XP_497773    | R | K | RK | benign            |
| rs2989277 | XP_496483    | T | P | TP | benign            |
| rs2989374 | XP_497039    | H | R | HR | benign            |
| rs2989374 | XP_497029    | H | R | HR | benign            |
| rs2989540 | XP_376554    | E | D | ED | benign            |
| rs2989545 | XP_376554    | L | P | LP | benign            |
| rs2989710 | NP_954586    | V | I | VI | benign            |
| rs2989711 | NP_954586    | S | R | SR | possibly damaging |
| rs2990511 | NP_001985    | W | S | WS | probably damaging |
| rs2991344 | NP_078779    | A | D | AD | benign            |
| rs2991836 | XP_497242    | A | T | AT | benign            |
| rs2991836 | XP_497231    | A | T | AT | benign            |
| rs2992752 | NP_689588    | P | T | PT | possibly damaging |
| rs2992753 | NP_689588    | N | H | NH | benign            |
| rs2993206 | NP_671728    | G | A | GA | benign            |
| rs2993631 | NP_078904    | R | C | RC | benign            |
| rs2993726 | NP_055627    | A | V | AV | benign            |
| rs2994101 | XP_496343    | D | G | DG | benign            |
| rs2994101 | XP_496345    | D | G | DG | benign            |
| rs2994498 | XP_496270    | P | L | PL | probably damaging |
| rs2996335 | NP_671728    | A | V | AV | benign            |
| rs2996495 | NP_000355    | S | T | ST | benign            |
| rs2996496 | NP_000355    | R | K | RK | benign            |
| rs2996585 | NP_878249    | F | V | FV | possibly damaging |
| rs2997144 | XP_495941    | M | V | MV | possibly damaging |
| rs2997211 | NP_775767    | R | K | RK | benign            |
| rs2998139 | NP_208383    | L | P | LP | benign            |
| rs2998139 | NP_689856    | L | P | LP | possibly damaging |
| rs2998748 | NP_068800    | R | Q | RQ | benign            |
| rs2999829 | XP_496390    | V | A | VA | benign            |
| rs3000002 | XP_496486    | G | D | GD | possibly damaging |
| rs3000495 | NP_954586    | R | C | RC | possibly damaging |



|           |           |   |   |    |                   |
|-----------|-----------|---|---|----|-------------------|
| rs3000495 | NP_954714 | R | C | RC | possibly damaging |
| rs3000571 | XP_497051 | G | E | GE | possibly damaging |
| rs3000769 | XP_290629 | K | R | KR | benign            |
| rs3000771 | XP_290629 | R | H | RH | benign            |
| rs3001040 | NP_004974 | A | V | AV | benign            |
| rs3003174 | XP_027658 | L | P | LP | benign            |
| rs3003430 | NP_057317 | D | N | DN | benign            |
| rs3003601 | NP_057119 | A | G | AG | benign            |
| rs3003777 | XP_372092 | I | V | IV | benign            |
| rs3003777 | XP_497031 | I | V | IV | benign            |
| rs3005350 | XP_497048 | V | M | VM | benign            |
| rs3006870 | NP_775803 | N | S | NS | benign            |
| rs3007039 | NP_002399 | E | V | EV | possibly damaging |
| rs3007419 | NP_065682 | Q | R | QR | benign            |
| rs3008319 | NP_001100 | I | T | IT | benign            |
| rs3008390 | NP_208383 | V | D | VD | benign            |
| rs3008390 | NP_689856 | V | D | VD | possibly damaging |
| rs3008858 | NP_079039 | W | C | WC | probably damaging |
| rs3010109 | NP_689578 | R | W | RW | possibly damaging |
| rs3010594 | XP_376554 | P | H | PH | probably damaging |
| rs3010788 | NP_653168 | C | W | CW | probably damaging |
| rs3010980 | XP_378185 | N | S | NS | benign            |
| rs3011034 | XP_372097 | Y | S | YS | benign            |
| rs3011137 | XP_372097 | A | T | AT | benign            |
| rs3012075 | NP_073713 | H | Y | HY | benign            |
| rs3012627 | NP_004134 | Q | H | QH | possibly damaging |
| rs3013236 | NP_004397 | S | L | SL | benign            |
| rs3013939 | NP_001621 | A | S | AS | benign            |
| rs3014061 | XP_498484 | L | Q | LQ | benign            |
| rs3014061 | XP_498479 | L | Q | LQ | benign            |
| rs3014062 | XP_498479 | R | S | RS | benign            |
| rs3014062 | XP_498484 | S | R | SR | benign            |
| rs3014242 | NP_689713 | P | L | PL | benign            |
| rs3014244 | NP_689713 | G | W | GW | possibly damaging |
| rs3014626 | NP_116222 | S | N | SN | benign            |
| rs3014837 | NP_002954 | D | E | DE | benign            |
| rs3014939 | XP_495949 | E | K | EK | benign            |
| rs3015957 | NP_002385 | R | P | RP | probably damaging |
| rs3016125 | XP_371430 | G | R | GR | benign            |
| rs3016459 | XP_061880 | Q | R | QR | benign            |
| rs3016727 | XP_495876 | Q | P | QP | benign            |
| rs3016805 | NP_150635 | L | Q | LQ | benign            |
| rs3016805 | NP_150636 | L | Q | LQ | benign            |
| rs3016805 | NP_150637 | L | Q | LQ | benign            |
| rs3016805 | NP_001214 | L | Q | LQ | benign            |
| rs3016805 | NP_150634 | L | Q | LQ | benign            |

|           |           |   |   |    |                   |
|-----------|-----------|---|---|----|-------------------|
| rs3017764 | XP_372436 | F | L | FL | benign            |
| rs3018495 | XP_496769 | P | A | PA | probably damaging |
| rs3018749 | XP_061880 | L | M | LM | benign            |
| rs3018757 | NP_710163 | T | I | TI | benign            |
| rs3020630 | NP_000922 | D | N | DN | benign            |
| rs3020630 | NP_000921 | D | N | DN | benign            |
| rs3020630 | NP_127509 | D | N | DN | benign            |
| rs3020901 | NP_036371 | G | S | GS | benign            |
| rs3021084 | NP_000097 | P | L | PL | probably damaging |
| rs3021119 | NP_004554 | P | Q | PQ | benign            |
| rs3021367 | NP_612405 | G | A | GA | benign            |
| rs3021368 | NP_612405 | E | D | ED | benign            |
| rs3021369 | NP_612405 | A | P | AP | benign            |
| rs3021506 | NP_056273 | M | L | ML | possibly damaging |
| rs3021512 | NP_444509 | T | S | TS | benign            |
| rs3021513 | NP_444509 | Q | H | QH | benign            |
| rs3024472 | NP_000120 | V | I | VI | benign            |
| rs3024477 | NP_000120 | Y | F | YF | benign            |
| rs3024677 | NP_000409 | V | I | VI | benign            |
| rs3024678 | NP_000409 | P | S | PS | possibly damaging |
| rs3024772 | NP_003882 | R | H | RH | benign            |
| rs3024778 | NP_003882 | E | K | EK | probably damaging |
| rs3024801 | NP_942140 | L | F | LF | benign            |
| rs3024809 | NP_942140 | R | H | RH | benign            |
| rs3024839 | NP_003142 | I | V | IV | benign            |
| rs3024933 | NP_003142 | R | W | RW | probably damaging |
| rs3024952 | NP_003144 | M | R | MR | possibly damaging |
| rs3025213 | NP_000972 | H | Q | HQ | probably damaging |
| rs3025380 | NP_000778 | G | A | GA | possibly damaging |
| rs3025421 | NP_000778 | W | S | WS | probably damaging |
| rs3025555 | NP_919415 | A | G | AG | benign            |
| rs3025574 | NP_003565 | S | T | ST | benign            |
| rs3025574 | NP_919415 | S | T | ST | benign            |
| rs3025599 | NP_003565 | S | C | SC | possibly damaging |
| rs3025599 | NP_919415 | S | C | SC | possibly damaging |
| rs3025919 | NP_000829 | E | D | ED | benign            |
| rs3025939 | NP_005036 | W | G | WG | probably damaging |
| rs3025939 | NP_774959 | W | G | WG | probably damaging |
| rs3025962 | NP_005036 | T | A | TA | benign            |
| rs3025962 | NP_774959 | T | A | TA | benign            |
| rs3025963 | NP_005036 | E | V | EV | benign            |
| rs3025963 | NP_774959 | E | V | EV | benign            |
| rs3025968 | NP_005036 | H | D | HD | probably damaging |
| rs3025968 | NP_774959 | H | D | HD | probably damaging |
| rs3025980 | NP_620159 | R | Q | RQ | benign            |
| rs3025993 | NP_004254 | L | H | LH | possibly damaging |

|           |           |   |   |    |                   |
|-----------|-----------|---|---|----|-------------------|
| rs3026042 | NP_862823 | E | K | EK | benign            |
| rs3026051 | NP_003045 | I | N | IN | probably damaging |
| rs3026099 | NP_004694 | E | G | EG | possibly damaging |
| rs3026123 | NP_002523 | A | S | AS | benign            |
| rs3026147 | NP_115684 | A | E | AE | benign            |
| rs3026204 | NP_005078 | Q | L | QL | possibly damaging |
| rs3026263 | NP_004417 | P | S | PS | possibly damaging |
| rs3026263 | XP_208080 | P | S | PS | possibly damaging |
| rs3026268 | NP_002476 | T | A | TA | benign            |
| rs3026284 | NP_004920 | G | D | GD | possibly damaging |
| rs3026759 | NP_065681 | E | K | EK | benign            |
| rs3026759 | NP_066124 | E | K | EK | benign            |
| rs3026760 | NP_065681 | K | E | KE | benign            |
| rs3026760 | NP_066124 | K | E | KE | benign            |
| rs3026902 | NP_001388 | L | Q | LQ | possibly damaging |
| rs3026906 | NP_001388 | R | C | RC | possibly damaging |
| rs3026987 | NP_067012 | R | W | RW | possibly damaging |
| rs3027002 | NP_067012 | G | R | GR | probably damaging |
| rs3027017 | NP_002027 | D | V | DV | possibly damaging |
| rs3027018 | NP_002027 | M | L | ML | benign            |
| rs3027020 | NP_002027 | L | Q | LQ | benign            |
| rs3027177 | NP_002607 | M | T | MT | benign            |
| rs3027180 | NP_002607 | D | G | DG | possibly damaging |
| rs3027184 | NP_002607 | S | F | SF | benign            |
| rs3027189 | NP_002607 | E | K | EK | benign            |
| rs3027190 | NP_002607 | S | C | SC | possibly damaging |
| rs3027193 | NP_002607 | R | H | RH | benign            |
| rs3027194 | NP_002607 | R | H | RH | benign            |
| rs3027205 | NP_067641 | I | V | IV | benign            |
| rs3027206 | NP_067641 | L | W | LW | possibly damaging |
| rs3027238 | XP_496182 | I | V | IV | benign            |
| rs3027254 | NP_004208 | H | Q | HQ | benign            |
| rs3027470 | NP_006512 | T | A | TA | benign            |
| rs3027482 | NP_004970 | L | V | LV | benign            |
| rs3027507 | NP_060072 | M | R | MR | probably damaging |
| rs3027508 | NP_060072 | G | R | GR | probably damaging |
| rs3027646 | NP_000052 | T | A | TA | benign            |
| rs3027652 | NP_004076 | E | D | ED | benign            |
| rs3027721 | NP_036603 | A | T | AT | benign            |
| rs3027722 | NP_036603 | Y | F | YF | benign            |
| rs3027818 | NP_079086 | T | A | TA | benign            |
| rs3027877 | NP_005325 | T | S | TS | benign            |
| rs3027884 | NP_005325 | T | A | TA | benign            |
| rs3027956 | NP_005619 | P | A | PA | possibly damaging |
| rs3027961 | NP_005619 | V | L | VL | benign            |
| rs3055727 | NP_085143 | S | N | SN | benign            |

|           |           |   |   |    |                   |
|-----------|-----------|---|---|----|-------------------|
| rs3087209 | NP_000577 | L | R | LR | possibly damaging |
| rs3087335 | NP_439892 | Y | S | YS | probably damaging |
| rs3087335 | NP_001789 | Y | S | YS | probably damaging |
| rs3087355 | NP_005906 | E | V | EV | probably damaging |
| rs3087366 | NP_006221 | N | S | NS | benign            |
| rs3087373 | NP_002684 | P | S | PS | possibly damaging |
| rs3087374 | NP_002684 | Q | H | QH | benign            |
| rs3087386 | NP_057400 | F | S | FS | benign            |
| rs3087388 | NP_057400 | P | T | PT | probably damaging |
| rs3087392 | NP_057400 | N | T | NT | benign            |
| rs3087393 | NP_057400 | N | K | NK | benign            |
| rs3087394 | NP_057400 | M | V | MV | possibly damaging |
| rs3087396 | NP_057400 | S | I | SI | possibly damaging |
| rs3087398 | NP_057400 | L | W | LW | possibly damaging |
| rs3087399 | NP_057400 | N | S | NS | benign            |
| rs3087400 | NP_057400 | L | P | LP | possibly damaging |
| rs3087401 | NP_057400 | A | T | AT | benign            |
| rs3087403 | NP_057400 | V | M | VM | benign            |
| rs3087405 | NP_055126 | C | S | CS | benign            |
| rs3087414 | NP_000544 | S | L | SL | possibly damaging |
| rs3087425 | NP_000544 | R | C | RC | probably damaging |
| rs3087450 | NP_004517 | A | T | AT | benign            |
| rs3087452 | NP_004517 | D | E | DE | benign            |
| rs3087469 | NP_002519 | R | W | RW | possibly damaging |
| rs3087615 | NP_004270 | E | D | ED | benign            |
| rs3087653 | NP_003075 | E | A | EA | benign            |
| rs3087689 | NP_835388 | S | P | SP | benign            |
| rs3087689 | NP_075384 | S | P | SP | benign            |
| rs3087866 | NP_060584 | Q | R | QR | benign            |
| rs3087878 | NP_066565 | Q | K | QK | benign            |
| rs3087944 | NP_005195 | S | F | SF | benign            |
| rs3088074 | NP_612114 | Q | E | QE | benign            |
| rs3088074 | NP_612115 | Q | E | QE | benign            |
| rs3088074 | NP_000480 | Q | E | QE | benign            |
| rs3088113 | NP_006816 | A | T | AT | benign            |
| rs3088142 | NP_057448 | Y | C | YC | possibly damaging |
| rs3088190 | NP_066549 | L | V | LV | benign            |
| rs3088235 | NP_060158 | I | T | IT | benign            |
| rs3088241 | NP_112597 | D | E | DE | benign            |
| rs3091339 | NP_059488 | K | E | KE | possibly damaging |
| rs3092831 | NP_612149 | T | K | TK | possibly damaging |
| rs3092831 | NP_000042 | T | K | TK | possibly damaging |
| rs3092841 | NP_000042 | E | Q | EQ | benign            |
| rs3092849 | NP_612149 | L | F | LF | benign            |
| rs3092849 | NP_000042 | L | F | LF | benign            |
| rs3092856 | NP_612149 | H | Y | HY | benign            |

|           |           |   |   |    |                   |
|-----------|-----------|---|---|----|-------------------|
| rs3092856 | NP_000042 | H | Y | HY | benign            |
| rs3092856 | NP_612150 | H | Y | HY | benign            |
| rs3092857 | NP_000042 | M | V | MV | benign            |
| rs3092895 | NP_000312 | L | F | LF | benign            |
| rs3092896 | NP_000312 | N | S | NS | possibly damaging |
| rs3092900 | NP_000312 | N | H | NH | benign            |
| rs3092902 | NP_000312 | E | D | ED | benign            |
| rs3092903 | NP_000312 | D | E | DE | possibly damaging |
| rs3092905 | NP_000312 | E | G | EG | possibly damaging |
| rs3092907 | NP_612149 | V | L | VL | benign            |
| rs3092907 | NP_000042 | V | L | VL | benign            |
| rs3093104 | NP_001073 | S | Y | SY | probably damaging |
| rs3093105 | NP_001073 | W | G | WG | benign            |
| rs3093153 | NP_001073 | G | V | GV | probably damaging |
| rs3093200 | NP_001073 | L | M | LM | benign            |
| rs3093248 | NP_062562 | E | K | EK | benign            |
| rs3093248 | NP_000122 | E | K | EK | benign            |
| rs3093267 | NP_062562 | A | T | AT | benign            |
| rs3093267 | NP_000122 | A | T | AT | benign            |
| rs3093370 | NP_851565 | R | C | RC | benign            |
| rs3093386 | NP_851565 | G | S | GS | benign            |
| rs3093431 | NP_006841 | H | R | HR | possibly damaging |
| rs3093446 | NP_006841 | V | L | VL | benign            |
| rs3093495 | NP_002177 | R | K | RK | benign            |
| rs3093495 | NP_789743 | R | K | RK | benign            |
| rs3093514 | NP_002177 | Y | C | YC | probably damaging |
| rs3093514 | NP_789743 | Y | C | YC | probably damaging |
| rs3093543 | NP_000586 | H | P | HP | benign            |
| rs3093554 | NP_002332 | G | E | GE | benign            |
| rs3093554 | NP_033666 | G | S | GS | benign            |
| rs3093555 | NP_002332 | A | P | AP | possibly damaging |
| rs3093647 | NP_055128 | A | V | AV | benign            |
| rs3093763 | NP_996820 | D | H | DH | possibly damaging |
| rs3093765 | NP_996820 | P | S | PS | probably damaging |
| rs3093785 | NP_001230 | M | V | MV | benign            |
| rs3093905 | NP_005475 | S | N | SN | benign            |
| rs3093906 | NP_005475 | N | S | NS | benign            |
| rs3093921 | NP_005475 | D | G | DG | possibly damaging |
| rs3093925 | NP_005475 | I | V | IV | benign            |
| rs3093926 | NP_005475 | R | Q | RQ | benign            |
| rs3094124 | NP_003888 | P | A | PA | probably damaging |
| rs3094258 | NP_057302 | I | T | IT | possibly damaging |
| rs3094378 | NP_060055 | M | T | MT | possibly damaging |
| rs3094806 | XP_496483 | D | Y | DY | probably damaging |
| rs3094807 | XP_496483 | Q | E | QE | benign            |
| rs3095183 | NP_942150 | K | N | KN | possibly damaging |

|           |           |   |   |    |                   |
|-----------|-----------|---|---|----|-------------------|
| rs3095726 | NP_689573 | V | M | VM | benign            |
| rs3096270 | XP_496159 | A | V | AV | benign            |
| rs3096380 | NP_060818 | L | F | LF | possibly damaging |
| rs3096381 | NP_060818 | T | K | TK | benign            |
| rs3096696 | NP_619731 | A | E | AE | benign            |
| rs3096696 | NP_620312 | A | E | AE | benign            |
| rs3096696 | NP_005146 | A | E | AE | benign            |
| rs3096697 | NP_085155 | R | K | RK | benign            |
| rs3097109 | NP_066267 | F | L | FL | possibly damaging |
| rs3097111 | NP_066267 | A | G | AG | benign            |
| rs3097112 | NP_066267 | P | A | PA | possibly damaging |
| rs3097113 | NP_066267 | S | R | SR | benign            |
| rs3097256 | NP_776256 | V | L | VL | benign            |
| rs3097675 | NP_002112 | I | T | IT | possibly damaging |
| rs3097885 | NP_002767 | R | M | RM | benign            |
| rs3097885 | NP_665895 | R | M | RM | benign            |
| rs3098019 | NP_002107 | W | G | WG | probably damaging |
| rs3098412 | NP_908930 | C | G | CG | probably damaging |
| rs3098412 | NP_908932 | C | G | CG | probably damaging |
| rs3098412 | NP_000025 | C | G | CG | probably damaging |
| rs3098416 | NP_908930 | A | S | AS | benign            |
| rs3098416 | NP_908932 | A | S | AS | benign            |
| rs3098416 | NP_000025 | A | S | AS | benign            |
| rs3098494 | XP_372214 | D | E | DE | benign            |
| rs3098927 | NP_055806 | S | F | SF | benign            |
| rs3099209 | NP_689747 | S | N | SN | benign            |
| rs3099537 | NP_084656 | P | S | PS | benign            |
| rs3099537 | NP_084657 | P | S | PS | benign            |
| rs3099537 | NP_005261 | P | S | PS | benign            |
| rs3099537 | NP_084655 | P | S | PS | benign            |
| rs3099950 | NP_919246 | E | K | EK | benign            |
| rs3100096 | XP_497871 | A | V | AV | benign            |
| rs3100246 | NP_078968 | R | L | RL | possibly damaging |
| rs3100898 | NP_001654 | L | M | LM | benign            |
| rs3100906 | NP_004704 | C | S | CS | possibly damaging |
| rs3101873 | NP_835260 | A | V | AV | benign            |
| rs3101878 | NP_835260 | Q | K | QK | benign            |
| rs3101960 | XP_372092 | L | P | LP | possibly damaging |
| rs3101960 | XP_497031 | L | P | LP | possibly damaging |
| rs3101961 | XP_372092 | R | P | RP | possibly damaging |
| rs3101961 | XP_497031 | R | P | RP | probably damaging |
| rs3103004 | NP_003370 | R | C | RC | probably damaging |
| rs3103117 | NP_064544 | S | Y | SY | possibly damaging |
| rs3103135 | NP_064544 | N | H | NH | benign            |
| rs3103691 | XP_375688 | H | R | HR | benign            |
| rs3103691 | XP_290949 | H | R | HR | benign            |

|           |           |   |   |    |                   |
|-----------|-----------|---|---|----|-------------------|
| rs3104230 | NP_689836 | A | S | AS | benign            |
| rs3104233 | NP_006135 | T | M | TM | benign            |
| rs3104717 | NP_057302 | R | I | RI | probably damaging |
| rs3104729 | NP_057302 | L | F | LF | benign            |
| rs3105367 | NP_775758 | P | L | PL | probably damaging |
| rs3105524 | XP_496692 | A | V | AV | benign            |
| rs3105932 | XP_497046 | G | E | GE | possibly damaging |
| rs3106629 | XP_372424 | T | I | TI | benign            |
| rs3107275 | NP_115981 | P | L | PL | benign            |
| rs3107306 | NP_000039 | A | G | AG | benign            |
| rs3108460 | NP_835226 | I | F | IF | benign            |
| rs3108728 | NP_443728 | E | K | EK | benign            |
| rs3109083 | XP_092267 | E | D | ED | benign            |
| rs3109215 | NP_115505 | R | G | RG | benign            |
| rs3109731 | XP_372097 | Q | R | QR | benign            |
| rs3109731 | XP_372090 | Q | R | QR | probably damaging |
| rs3110234 | NP_002301 | V | I | VI | benign            |
| rs3111226 | XP_496433 | R | K | RK | benign            |
| rs3111329 | NP_776256 | F | L | FL | benign            |
| rs3111367 | XP_370968 | P | L | PL | possibly damaging |
| rs3111368 | XP_370968 | E | K | EK | benign            |
| rs3112374 | NP_995327 | V | I | VI | benign            |
| rs3112557 | NP_908930 | D | A | DA | benign            |
| rs3112557 | NP_908932 | D | A | DA | benign            |
| rs3112557 | NP_000025 | D | A | DA | benign            |
| rs3112831 | NP_000341 | H | R | HR | benign            |
| rs3113676 | NP_060405 | R | C | RC | possibly damaging |
| rs3113842 | NP_064544 | Y | H | YH | benign            |
| rs3115462 | XP_496483 | D | N | DN | benign            |
| rs3115532 | XP_496413 | A | G | AG | benign            |
| rs3115583 | NP_006067 | Q | H | QH | benign            |
| rs3116148 | NP_112603 | K | Q | KQ | benign            |
| rs3116392 | NP_036222 | T | A | TA | benign            |
| rs3116394 | NP_149033 | P | S | PS | benign            |
| rs3116448 | NP_004818 | S | P | SP | possibly damaging |
| rs3116713 | NP_002627 | K | R | KR | benign            |
| rs3116713 | NP_077084 | K | R | KR | benign            |
| rs3116817 | XP_498072 | G | E | GE | benign            |
| rs3116818 | XP_498072 | V | F | VF | benign            |
| rs3116819 | XP_498072 | A | V | AV | benign            |
| rs3116855 | NP_112167 | H | Y | HY | benign            |
| rs3116856 | NP_112167 | A | V | AV | benign            |
| rs3118454 | NP_057309 | G | R | GR | benign            |
| rs3118454 | NP_057208 | G | R | GR | benign            |
| rs3118635 | NP_000746 | M | L | ML | benign            |
| rs3118635 | NP_003994 | M | L | ML | benign            |

|           |           |   |   |    |                   |
|-----------|-----------|---|---|----|-------------------|
| rs3119582 | XP_212238 | M | T | MT | benign            |
| rs3119601 | NP_954586 | V | E | VE | benign            |
| rs3119886 | XP_372190 | I | V | IV | benign            |
| rs3119932 | XP_497082 | P | S | PS | benign            |
| rs3120081 | XP_497242 | D | N | DN | benign            |
| rs3120355 | XP_495814 | S | A | SA | benign            |
| rs3120645 | XP_048104 | E | Q | EQ | benign            |
| rs3120647 | XP_048104 | S | F | SF | possibly damaging |
| rs3120648 | XP_048104 | T | N | TN | benign            |
| rs3120649 | XP_048104 | S | L | SL | possibly damaging |
| rs3120651 | XP_048104 | N | T | NT | possibly damaging |
| rs3120652 | XP_048104 | N | Y | NY | probably damaging |
| rs3120654 | XP_048104 | S | Y | SY | probably damaging |
| rs3120655 | XP_048104 | T | I | TI | possibly damaging |
| rs3120779 | XP_496433 | R | K | RK | benign            |
| rs3121079 | XP_291396 | W | R | WR | probably damaging |
| rs3121081 | XP_291396 | S | A | SA | benign            |
| rs3121399 | XP_372763 | Y | D | YD | benign            |
| rs3121478 | NP_006166 | A | T | AT | benign            |
| rs3121478 | NP_932326 | A | T | AT | benign            |
| rs3121544 | XP_378185 | R | K | RK | benign            |
| rs3122210 | NP_775494 | L | S | LS | possibly damaging |
| rs3122407 | NP_694984 | R | K | RK | benign            |
| rs3122463 | NP_002162 | R | K | RK | benign            |
| rs3122712 | NP_705834 | N | S | NS | benign            |
| rs3122713 | NP_705834 | D | N | DN | benign            |
| rs3122726 | XP_497046 | K | R | KR | benign            |
| rs3122788 | XP_497048 | S | G | SG | benign            |
| rs3122944 | NP_055427 | G | S | GS | benign            |
| rs3123101 | XP_087804 | L | Q | LQ | possibly damaging |
| rs3123331 | NP_775931 | S | N | SN | benign            |
| rs3124747 | XP_376921 | K | E | KE | benign            |
| rs3124993 | NP_434700 | V | L | VL | benign            |
| rs3125001 | NP_060087 | A | T | AT | benign            |
| rs3125068 | XP_291625 | A | V | AV | benign            |
| rs3125068 | XP_291638 | A | V | AV | benign            |
| rs3125075 | XP_375688 | C | R | CR | benign            |
| rs3125075 | XP_290949 | R | C | RC | benign            |
| rs3125189 | NP_777622 | I | S | IS | benign            |
| rs3125240 | NP_055627 | E | K | EK | benign            |
| rs3125630 | NP_003026 | A | V | AV | benign            |
| rs3125734 | NP_660350 | H | R | HR | benign            |
| rs3125818 | NP_060908 | R | Q | RQ | benign            |
| rs3126065 | XP_378901 | S | P | SP | possibly damaging |
| rs3126069 | XP_378901 | H | R | HR | probably damaging |
| rs3126072 | XP_048104 | G | R | GR | possibly damaging |



|           |           |   |   |    |                   |
|-----------|-----------|---|---|----|-------------------|
| rs3126074 | XP_048104 | H | Q | HQ | benign            |
| rs3126075 | XP_048104 | R | T | RT | benign            |
| rs3126076 | XP_048104 | R | W | RW | benign            |
| rs3126079 | XP_048104 | H | Q | HQ | possibly damaging |
| rs3126080 | XP_048104 | R | H | RH | possibly damaging |
| rs3126081 | XP_048104 | T | A | TA | benign            |
| rs3126141 | NP_008846 | K | R | KR | benign            |
| rs3126397 | XP_375931 | Q | R | QR | benign            |
| rs3127106 | NP_006166 | Q | R | QR | benign            |
| rs3127106 | NP_932326 | Q | R | QR | benign            |
| rs3127158 | NP_660346 | I | V | IV | benign            |
| rs3127328 | NP_003172 | G | S | GS | benign            |
| rs3127336 | NP_003172 | L | V | LV | benign            |
| rs3127728 | XP_495814 | H | R | HR | benign            |
| rs3127729 | XP_495814 | D | H | DH | possibly damaging |
| rs3127735 | XP_495814 | M | I | MI | benign            |
| rs3127785 | NP_852660 | E | D | ED | benign            |
| rs3127785 | NP_114118 | E | D | ED | benign            |
| rs3128222 | XP_495840 | R | Q | RQ | benign            |
| rs3128222 | XP_495842 | R | Q | RQ | benign            |
| rs3128853 | NP_039224 | S | F | SF | probably damaging |
| rs3129018 | NP_002107 | T | P | TP | possibly damaging |
| rs3129019 | NP_002107 | V | E | VE | benign            |
| rs3129157 | NP_112167 | A | T | AT | benign            |
| rs3129168 | XP_498072 | F | V | FV | benign            |
| rs3129941 | NP_006772 | R | C | RC | possibly damaging |
| rs3130049 | NP_004630 | P | H | PH | possibly damaging |
| rs3130049 | NP_542434 | P | H | PH | possibly damaging |
| rs3130062 | NP_004998 | C | R | CR | benign            |
| rs3130100 | NP_005444 | A | T | AT | benign            |
| rs3130253 | NP_002424 | V | I | VI | benign            |
| rs3130253 | NP_996533 | V | I | VI | benign            |
| rs3130253 | NP_996532 | V | I | VI | benign            |
| rs3130257 | NP_005443 | A | T | AT | benign            |
| rs3130618 | NP_149417 | R | L | RL | possibly damaging |
| rs3130645 | XP_376479 | S | P | SP | possibly damaging |
| rs3130743 | NP_112167 | A | T | AT | benign            |
| rs3130764 | XP_498070 | I | V | IV | benign            |
| rs3130765 | XP_498070 | M | I | MI | benign            |
| rs3131087 | XP_498069 | L | I | LI | benign            |
| rs3131639 | NP_005922 | D | N | DN | benign            |
| rs3132055 | XP_372953 | Y | H | YH | benign            |
| rs3132453 | NP_004629 | V | L | VL | benign            |
| rs3132453 | NP_542417 | V | L | VL | benign            |
| rs3132589 | XP_376479 | E | D | ED | benign            |
| rs3133166 | NP_004748 | P | A | PA | benign            |

|           |           |   |   |    |                   |
|-----------|-----------|---|---|----|-------------------|
| rs3133338 | NP_079082 | F | S | FS | probably damaging |
| rs3134031 | NP_714915 | V | I | VI | benign            |
| rs3134253 | NP_056235 | V | I | VI | benign            |
| rs3134579 | NP_066267 | H | P | HP | benign            |
| rs3134599 | NP_958786 | V | L | VL | benign            |
| rs3134599 | NP_958785 | V | L | VL | benign            |
| rs3134599 | NP_958784 | V | L | VL | benign            |
| rs3134599 | NP_958783 | V | L | VL | benign            |
| rs3134599 | NP_958782 | V | L | VL | benign            |
| rs3134599 | NP_958781 | V | L | VL | benign            |
| rs3134599 | NP_958780 | V | L | VL | benign            |
| rs3134599 | NP_000436 | V | L | VL | benign            |
| rs3134600 | NP_958786 | V | L | VL | benign            |
| rs3134600 | NP_958785 | V | L | VL | benign            |
| rs3134600 | NP_958784 | V | L | VL | benign            |
| rs3134600 | NP_958783 | V | L | VL | benign            |
| rs3134600 | NP_958782 | V | L | VL | benign            |
| rs3134600 | NP_958781 | V | L | VL | benign            |
| rs3134600 | NP_958780 | V | L | VL | benign            |
| rs3134600 | NP_000436 | V | L | VL | benign            |
| rs3134604 | NP_619731 | W | C | WC | probably damaging |
| rs3134604 | NP_620312 | W | C | WC | probably damaging |
| rs3134604 | NP_005146 | W | C | WC | probably damaging |
| rs3134626 | NP_908930 | K | N | KN | probably damaging |
| rs3134626 | NP_908932 | K | N | KN | probably damaging |
| rs3134626 | NP_000025 | K | N | KN | probably damaging |
| rs3134667 | NP_005090 | G | S | GS | benign            |
| rs3134675 | NP_848701 | R | L | RL | benign            |
| rs3134675 | NP_002710 | R | L | RL | benign            |
| rs3134900 | NP_005922 | I | M | IM | benign            |
| rs3134958 | NP_061978 | S | R | SR | benign            |
| rs3134959 | NP_061978 | P | H | PH | probably damaging |
| rs3134960 | NP_061978 | S | R | SR | benign            |
| rs3135108 | NP_958786 | A | V | AV | benign            |
| rs3135108 | NP_958785 | A | V | AV | benign            |
| rs3135108 | NP_958784 | A | V | AV | benign            |
| rs3135108 | NP_958783 | A | V | AV | benign            |
| rs3135108 | NP_958782 | A | V | AV | benign            |
| rs3135108 | NP_958781 | A | V | AV | benign            |
| rs3135108 | NP_958780 | A | V | AV | benign            |
| rs3135108 | NP_000436 | A | V | AV | benign            |
| rs3135109 | NP_958786 | L | V | LV | benign            |
| rs3135109 | NP_958785 | L | V | LV | benign            |
| rs3135109 | NP_958784 | L | V | LV | benign            |
| rs3135109 | NP_958783 | L | V | LV | benign            |
| rs3135109 | NP_958782 | L | V | LV | benign            |

|           |           |   |   |    |                   |
|-----------|-----------|---|---|----|-------------------|
| rs3135109 | NP_958781 | L | V | LV | benign            |
| rs3135109 | NP_958780 | L | V | LV | benign            |
| rs3135109 | NP_000436 | L | V | LV | benign            |
| rs3135152 | XP_377828 | H | R | HR | benign            |
| rs3135163 | NP_775931 | S | N | SN | benign            |
| rs3135506 | NP_443200 | S | W | SW | possibly damaging |
| rs3135507 | NP_443200 | V | M | VM | benign            |
| rs3135533 | NP_002906 | L | V | LV | benign            |
| rs3135684 | NP_002905 | A | V | AV | possibly damaging |
| rs3135684 | NP_852136 | A | V | AV | possibly damaging |
| rs3136025 | NP_002302 | R | H | RH | benign            |
| rs3136025 | NP_039269 | R | H | RH | benign            |
| rs3136334 | NP_000170 | P | A | PA | benign            |
| rs3136389 | NP_055126 | R | W | RW | probably damaging |
| rs3136422 | NP_006541 | R | K | RK | benign            |
| rs3136616 | NP_751950 | A | E | AE | benign            |
| rs3136677 | NP_005399 | A | S | AS | benign            |
| rs3136797 | NP_002681 | P | R | PR | possibly damaging |
| rs3136820 | NP_001632 | D | E | DE | benign            |
| rs3136820 | NP_542379 | D | E | DE | benign            |
| rs3136820 | NP_542380 | D | E | DE | benign            |
| rs3138038 | NP_005614 | K | Q | KQ | benign            |
| rs3138100 | NP_001756 | N | T | NT | benign            |
| rs3138105 | NP_001756 | S | F | SF | possibly damaging |
| rs3138268 | NP_598011 | T | M | TM | benign            |
| rs3138268 | NP_598012 | T | M | TM | benign            |
| rs3138268 | NP_598010 | T | M | TM | benign            |
| rs3138505 | NP_006696 | G | S | GS | benign            |
| rs3168277 | NP_060863 | R | Q | RQ | benign            |
| rs3168486 | NP_006422 | T | I | TI | benign            |
| rs3168583 | NP_066549 | R | L | RL | probably damaging |
| rs3168891 | NP_057670 | S | R | SR | benign            |
| rs3169422 | NP_003924 | Q | E | QE | benign            |
| rs3169693 | NP_954976 | F | L | FL | benign            |
| rs3169983 | NP_942130 | T | A | TA | benign            |
| rs3169983 | NP_002631 | T | A | TA | benign            |
| rs3170216 | NP_002771 | L | V | LV | benign            |
| rs3170216 | NP_998798 | L | V | LV | benign            |
| rs3170660 | NP_060536 | G | R | GR | possibly damaging |
| rs3170843 | NP_612426 | T | A | TA | benign            |
| rs3170926 | NP_006163 | L | F | LF | benign            |
| rs3170979 | NP_659004 | T | N | TN | probably damaging |
| rs3170987 | XP_059132 | H | P | HP | benign            |
| rs3171120 | NP_055816 | V | L | VL | benign            |
| rs3171366 | NP_056153 | S | F | SF | benign            |
| rs3171367 | NP_056153 | A | T | AT | benign            |

|           |           |   |   |    |                   |
|-----------|-----------|---|---|----|-------------------|
| rs3171384 | NP_115998 | E | V | EV | probably damaging |
| rs3171439 | NP_444507 | D | G | DG | possibly damaging |
| rs3172008 | NP_659475 | S | I | SI | benign            |
| rs3172334 | NP_065916 | L | I | LI | benign            |
| rs3172477 | NP_775463 | E | V | EV | possibly damaging |
| rs3172477 | NP_057567 | E | V | EV | possibly damaging |
| rs3172601 | NP_982287 | D | A | DA | possibly damaging |
| rs3172603 | NP_982287 | V | L | VL | benign            |
| rs3172747 | NP_005724 | P | L | PL | possibly damaging |
| rs3172770 | XP_379323 | S | T | ST | benign            |
| rs3172771 | XP_379323 | T | A | TA | benign            |
| rs3172957 | NP_065741 | K | Q | KQ | benign            |
| rs3172957 | NP_060217 | K | Q | KQ | benign            |
| rs3173070 | NP_036309 | D | V | DV | probably damaging |
| rs3173126 | NP_005882 | S | N | SN | benign            |
| rs3173419 | NP_002107 | D | N | DN | benign            |
| rs3173420 | NP_002107 | R | Q | RQ | benign            |
| rs3173424 | NP_002107 | T | S | TS | benign            |
| rs3173426 | NP_002107 | N | K | NK | benign            |
| rs3173428 | NP_002107 | G | E | GE | benign            |
| rs3173429 | NP_002107 | F | L | FL | benign            |
| rs3173431 | NP_002107 | S | L | SL | benign            |
| rs3173519 | NP_003795 | V | A | VA | benign            |
| rs3173615 | NP_060844 | T | S | TS | benign            |
| rs3173635 | NP_038467 | L | P | LP | possibly damaging |
| rs3174147 | NP_055396 | I | V | IV | benign            |
| rs3174148 | NP_055396 | H | D | HD | possibly damaging |
| rs3174149 | NP_055396 | R | T | RT | benign            |
| rs3174150 | NP_055396 | R | G | RG | possibly damaging |
| rs3174288 | NP_003380 | R | G | RG | benign            |
| rs3174288 | NP_438171 | R | G | RG | benign            |
| rs3174411 | NP_038472 | S | R | SR | benign            |
| rs3174450 | NP_689794 | N | K | NK | benign            |
| rs3174500 | NP_060946 | V | L | VL | benign            |
| rs3174612 | NP_000356 | A | P | AP | probably damaging |
| rs3174720 | NP_006461 | R | W | RW | benign            |
| rs3174959 | NP_079305 | S | N | SN | benign            |
| rs3175026 | NP_056991 | T | P | TP | possibly damaging |
| rs3175105 | NP_002116 | D | G | DG | benign            |
| rs3175105 | NP_002115 | C | Y | CY | probably damaging |
| rs3175191 | NP_036390 | L | P | LP | benign            |
| rs3175992 | NP_005505 | Q | L | QL | benign            |
| rs3176162 | NP_002684 | R | Q | RQ | benign            |
| rs3176311 | NP_006275 | I | T | IT | benign            |
| rs3176383 | NP_002425 | K | Q | KQ | benign            |
| rs3176443 | NP_066988 | L | V | LV | benign            |

|           |           |   |   |    |                   |
|-----------|-----------|---|---|----|-------------------|
| rs3176588 | NP_004498 | D | E | DE | benign            |
| rs3176749 | NP_000371 | V | L | VL | benign            |
| rs3176750 | NP_000371 | L | V | LV | benign            |
| rs3176798 | NP_001772 | E | K | EK | benign            |
| rs3176930 | NP_000914 | R | Q | RQ | benign            |
| rs3176931 | NP_001127 | R | Q | RQ | benign            |
| rs3176932 | NP_599150 | S | F | SF | benign            |
| rs3176950 | NP_002112 | R | K | RK | benign            |
| rs3176960 | NP_000415 | D | E | DE | benign            |
| rs3176968 | NP_000143 | I | V | IV | benign            |
| rs3176969 | NP_001756 | I | M | IM | benign            |
| rs3176971 | NP_001756 | S | T | ST | benign            |
| rs3176972 | NP_001756 | N | Y | NY | benign            |
| rs3176975 | NP_000033 | L | V | LV | benign            |
| rs3177012 | NP_000257 | R | M | RM | benign            |
| rs3177049 | NP_003711 | L | P | LP | benign            |
| rs3177049 | NP_982257 | L | P | LP | benign            |
| rs3177051 | NP_006383 | M | T | MT | benign            |
| rs3177058 | NP_057154 | M | I | MI | possibly damaging |
| rs3177061 | NP_076949 | E | K | EK | benign            |
| rs3177153 | NP_620129 | Q | R | QR | benign            |
| rs3177157 | NP_071739 | A | D | AD | possibly damaging |
| rs3177168 | NP_068593 | G | R | GR | possibly damaging |
| rs3177172 | NP_848567 | G | S | GS | benign            |
| rs3177173 | NP_848567 | L | P | LP | possibly damaging |
| rs3177200 | NP_073586 | V | L | VL | benign            |
| rs3177201 | NP_872286 | H | N | HN | probably damaging |
| rs3177201 | NP_872282 | H | N | HN | probably damaging |
| rs3177202 | NP_073586 | G | C | GC | probably damaging |
| rs3177203 | NP_060957 | L | F | LF | benign            |
| rs3177253 | NP_006108 | M | I | MI | possibly damaging |
| rs3177261 | NP_742017 | A | G | AG | benign            |
| rs3177310 | NP_036275 | L | P | LP | possibly damaging |
| rs3177328 | NP_689945 | E | K | EK | benign            |
| rs3177338 | NP_620124 | R | C | RC | probably damaging |
| rs3177378 | NP_116167 | P | H | PH | probably damaging |
| rs3177427 | NP_665877 | E | K | EK | benign            |
| rs3177427 | NP_665878 | K | E | KE | benign            |
| rs3177428 | NP_061138 | F | S | FS | possibly damaging |
| rs3177429 | NP_665878 | G | R | GR | benign            |
| rs3177429 | NP_665877 | G | R | GR | possibly damaging |
| rs3177459 | NP_064446 | E | D | ED | benign            |
| rs3177471 | NP_891549 | P | S | PS | probably damaging |
| rs3177472 | NP_620125 | R | H | RH | benign            |
| rs3177483 | NP_056268 | Q | R | QR | benign            |
| rs3177554 | NP_536349 | R | W | RW | possibly damaging |

|           |           |   |   |    |                   |
|-----------|-----------|---|---|----|-------------------|
| rs3177554 | NP_004500 | R | W | RW | possibly damaging |
| rs3177562 | NP_078907 | G | V | GV | probably damaging |
| rs3177589 | NP_002279 | S | T | ST | benign            |
| rs3177589 | NP_068354 | T | S | TS | benign            |
| rs3177634 | NP_899056 | W | C | WC | benign            |
| rs3177663 | NP_114091 | I | V | IV | benign            |
| rs3177676 | NP_640333 | N | S | NS | benign            |
| rs3177734 | NP_008886 | E | K | EK | benign            |
| rs3177751 | NP_001976 | T | M | TM | benign            |
| rs3177759 | NP_000293 | M | I | MI | possibly damaging |
| rs3177809 | NP_003888 | A | V | AV | benign            |
| rs3177811 | NP_000394 | G | A | GA | probably damaging |
| rs3177818 | NP_000615 | G | R | GR | probably damaging |
| rs3177821 | NP_004381 | H | Y | HY | benign            |
| rs3177821 | NP_683880 | H | Y | HY | benign            |
| rs3177828 | NP_001257 | G | A | GA | possibly damaging |
| rs3177865 | NP_778255 | E | Q | EQ | benign            |
| rs3177865 | NP_002552 | E | Q | EQ | benign            |
| rs3177921 | NP_005505 | A | T | AT | benign            |
| rs3177926 | NP_005505 | S | N | SN | benign            |
| rs3177945 | NP_005505 | K | T | KT | benign            |
| rs3177980 | NP_000646 | F | L | FL | possibly damaging |
| rs3178000 | NP_000346 | L | S | LS | possibly damaging |
| rs3178003 | NP_065741 | K | I | KI | possibly damaging |
| rs3178003 | NP_060217 | K | I | KI | possibly damaging |
| rs3178010 | NP_001563 | Q | R | QR | benign            |
| rs3178010 | NP_004020 | Q | R | QR | benign            |
| rs3178010 | NP_004022 | R | Q | RQ | benign            |
| rs3178134 | NP_055396 | M | I | MI | benign            |
| rs3178135 | NP_055396 | L | R | LR | possibly damaging |
| rs3178136 | NP_055396 | H | Y | HY | benign            |
| rs3178137 | NP_055396 | S | P | SP | possibly damaging |
| rs3178138 | NP_055396 | D | N | DN | benign            |
| rs3178140 | NP_055396 | R | L | RL | benign            |
| rs3178142 | NP_055396 | P | L | PL | possibly damaging |
| rs3178142 | NP_055397 | L | P | LP | probably damaging |
| rs3178149 | NP_115569 | L | V | LV | benign            |
| rs3178152 | NP_006282 | Q | E | QE | benign            |
| rs3178178 | NP_060880 | E | G | EG | possibly damaging |
| rs3178204 | NP_055914 | S | F | SF | benign            |
| rs3178297 | NP_005909 | K | R | KR | possibly damaging |
| rs3178611 | NP_065199 | T | P | TP | benign            |
| rs3178794 | NP_079064 | T | M | TM | benign            |
| rs3178811 | NP_808228 | M | L | ML | possibly damaging |
| rs3178812 | NP_808228 | M | V | MV | possibly damaging |
| rs3178817 | NP_777280 | A | V | AV | benign            |

|           |           |   |   |    |                   |
|-----------|-----------|---|---|----|-------------------|
| rs3178817 | NP_008830 | A | V | AV | benign            |
| rs3178954 | NP_001461 | Q | H | QH | benign            |
| rs3178985 | NP_066979 | Y | C | YC | benign            |
| rs3178988 | NP_963965 | W | C | WC | probably damaging |
| rs3178988 | NP_963964 | W | C | WC | probably damaging |
| rs3178988 | NP_998813 | W | C | WC | probably damaging |
| rs3178989 | NP_976219 | L | Q | LQ | benign            |
| rs3179003 | NP_667341 | R | S | RS | benign            |
| rs3179037 | NP_002772 | T | S | TS | possibly damaging |
| rs3179039 | NP_002775 | I | T | IT | benign            |
| rs3179049 | NP_002783 | A | S | AS | benign            |
| rs3179060 | NP_000585 | H | N | HN | benign            |
| rs3179143 | NP_073152 | E | D | ED | benign            |
| rs3179177 | NP_002107 | T | A | TA | possibly damaging |
| rs3179180 | NP_002107 | Q | E | QE | benign            |
| rs3179181 | NP_002107 | E | D | ED | benign            |
| rs3179182 | NP_002107 | R | G | RG | benign            |
| rs3179184 | NP_002107 | G | R | GR | benign            |
| rs3179187 | NP_002107 | I | M | IM | benign            |
| rs3179188 | NP_002107 | Y | S | YS | possibly damaging |
| rs3179191 | NP_002107 | G | W | GW | benign            |
| rs3179193 | NP_689512 | K | N | KN | benign            |
| rs3179193 | NP_055366 | K | N | KN | benign            |
| rs3179194 | NP_055366 | G | R | GR | benign            |
| rs3179194 | NP_689512 | G | R | GR | possibly damaging |
| rs3179195 | NP_689512 | P | L | PL | probably damaging |
| rs3179205 | NP_072049 | L | M | LM | benign            |
| rs3179206 | NP_072049 | R | P | RP | benign            |
| rs3179207 | NP_002107 | P | T | PT | benign            |
| rs3179213 | NP_072049 | K | T | KT | probably damaging |
| rs3179249 | NP_002107 | L | P | LP | benign            |
| rs3179278 | NP_002107 | V | M | VM | benign            |
| rs3179375 | NP_002107 | V | M | VM | benign            |
| rs3179387 | NP_003334 | E | V | EV | probably damaging |
| rs3179473 | NP_001447 | Q | R | QR | benign            |
| rs3179474 | NP_439893 | H | Q | HQ | probably damaging |
| rs3179474 | NP_006769 | H | Q | HQ | probably damaging |
| rs3179488 | NP_078831 | L | V | LV | benign            |
| rs3179488 | NP_036294 | L | V | LV | benign            |
| rs3179615 | NP_001460 | E | K | EK | possibly damaging |
| rs3179725 | NP_064611 | E | D | ED | benign            |
| rs3179763 | NP_000086 | R | C | RC | benign            |
| rs3179771 | NP_002112 | R | Q | RQ | benign            |
| rs3179795 | NP_665862 | L | M | LM | benign            |
| rs3179814 | NP_003949 | I | V | IV | benign            |
| rs3179861 | NP_004387 | S | A | SA | benign            |

|           |           |   |   |    |                   |
|-----------|-----------|---|---|----|-------------------|
| rs3179862 | NP_000394 | D | Y | DY | probably damaging |
| rs3179863 | NP_000394 | N | K | NK | probably damaging |
| rs3179864 | NP_000394 | A | V | AV | possibly damaging |
| rs3179893 | NP_000206 | H | R | HR | probably damaging |
| rs3179918 | NP_788954 | L | M | LM | benign            |
| rs3179969 | NP_060888 | V | M | VM | benign            |
| rs3179978 | NP_002115 | K | E | KE | benign            |
| rs3179978 | NP_072049 | Q | K | QK | benign            |
| rs3179979 | NP_072049 | A | S | AS | benign            |
| rs3179982 | NP_002107 | L | F | LF | benign            |
| rs3179993 | NP_835361 | T | N | TN | possibly damaging |
| rs3180032 | NP_077718 | L | P | LP | benign            |
| rs3180048 | NP_008850 | F | Y | FY | benign            |
| rs3180074 | NP_443173 | M | L | ML | benign            |
| rs3180081 | NP_002761 | D | H | DH | benign            |
| rs3180088 | NP_056307 | A | D | AD | benign            |
| rs3180089 | NP_112155 | G | E | GE | probably damaging |
| rs3180098 | NP_006846 | V | G | VG | possibly damaging |
| rs3180098 | NP_057839 | V | G | VG | probably damaging |
| rs3180160 | NP_620591 | C | F | CF | probably damaging |
| rs3180227 | NP_008850 | G | A | GA | benign            |
| rs3180252 | NP_005751 | N | S | NS | benign            |
| rs3180267 | NP_002107 | I | R | IR | benign            |
| rs3180278 | NP_002107 | I | F | IF | benign            |
| rs3180281 | NP_000508 | A | G | AG | benign            |
| rs3180281 | NP_000549 | A | G | AG | benign            |
| rs3180303 | NP_055296 | A | D | AD | possibly damaging |
| rs3180304 | NP_055296 | T | N | TN | benign            |
| rs3180313 | NP_061944 | E | G | EG | possibly damaging |
| rs3180332 | NP_006742 | S | P | SP | benign            |
| rs3180355 | NP_006764 | L | F | LF | possibly damaging |
| rs3180357 | NP_055397 | N | K | NK | benign            |
| rs3180370 | NP_057733 | I | T | IT | benign            |
| rs3180371 | NP_004991 | E | G | EG | probably damaging |
| rs3180379 | NP_005505 | R | L | RL | benign            |
| rs3180380 | NP_005505 | G | R | GR | benign            |
| rs3180382 | NP_000394 | V | L | VL | probably damaging |
| rs3180384 | NP_001089 | I | F | IF | possibly damaging |
| rs3180385 | NP_000219 | L | Q | LQ | possibly damaging |
| rs3180386 | NP_006812 | G | C | GC | benign            |
| rs3180391 | XP_039702 | M | L | ML | benign            |
| rs3180392 | NP_000005 | L | Q | LQ | possibly damaging |
| rs3180401 | NP_060238 | I | V | IV | benign            |
| rs3180408 | NP_059110 | T | M | TM | benign            |
| rs3180409 | NP_005198 | H | Y | HY | probably damaging |
| rs3180410 | NP_005198 | N | Y | NY | benign            |



|           |           |   |   |    |                   |
|-----------|-----------|---|---|----|-------------------|
| rs3180422 | NP_009115 | R | T | RT | benign            |
| rs3180433 | NP_938075 | V | E | VE | benign            |
| rs3180433 | NP_938074 | V | E | VE | benign            |
| rs3180433 | NP_001527 | V | E | VE | benign            |
| rs3180447 | NP_872286 | D | N | DN | benign            |
| rs3180447 | NP_872282 | D | N | DN | benign            |
| rs3180473 | NP_060310 | V | L | VL | benign            |
| rs3180499 | NP_071899 | E | D | ED | benign            |
| rs3180515 | NP_002285 | G | A | GA | benign            |
| rs3180515 | NP_054701 | G | A | GA | possibly damaging |
| rs3180549 | NP_000394 | G | A | GA | probably damaging |
| rs3180568 | NP_031393 | Q | R | QR | benign            |
| rs3180568 | NP_057951 | Q | R | QR | benign            |
| rs3180651 | NP_002775 | N | Y | NY | benign            |
| rs3180752 | NP_057118 | R | L | RL | probably damaging |
| rs3180793 | NP_072049 | R | L | RL | benign            |
| rs3180794 | NP_005613 | Q | P | QP | probably damaging |
| rs3180809 | NP_073152 | V | A | VA | benign            |
| rs3180820 | NP_073598 | Q | H | QH | possibly damaging |
| rs3180825 | NP_005794 | S | N | SN | benign            |
| rs3180833 | NP_004858 | F | V | FV | probably damaging |
| rs3180834 | NP_004858 | R | P | RP | possibly damaging |
| rs3180843 | NP_003280 | E | K | EK | benign            |
| rs3180945 | NP_872286 | A | P | AP | benign            |
| rs3180945 | NP_872282 | A | P | AP | benign            |
| rs3180947 | NP_000628 | P | T | PT | benign            |
| rs3180949 | NP_000628 | A | G | AG | benign            |
| rs3180950 | NP_000628 | E | G | EG | probably damaging |
| rs3180961 | NP_444505 | F | L | FL | possibly damaging |
| rs3180983 | NP_057113 | L | F | LF | benign            |
| rs3180993 | NP_057113 | L | F | LF | benign            |
| rs3180998 | NP_055568 | Y | H | YH | possibly damaging |
| rs3181009 | NP_945341 | D | N | DN | benign            |
| rs3181011 | NP_057354 | R | G | RG | possibly damaging |
| rs3181012 | NP_057354 | P | T | PT | possibly damaging |
| rs3181179 | NP_004338 | R | H | RH | benign            |
| rs3181326 | NP_004338 | V | L | VL | benign            |
| rs3181721 | NP_002768 | I | V | IV | benign            |
| rs3181894 | NP_000749 | I | T | IT | benign            |
| rs3182181 | NP_002941 | D | Y | DY | probably damaging |
| rs3182257 | XP_497119 | M | I | MI | benign            |
| rs3182286 | NP_001775 | G | V | GV | benign            |
| rs3182286 | NP_510966 | G | V | GV | benign            |
| rs3182535 | NP_055704 | A | V | AV | benign            |
| rs3182729 | NP_036293 | P | R | PR | probably damaging |
| rs3182793 | NP_060386 | S | F | SF | benign            |

|           |           |   |   |    |                   |
|-----------|-----------|---|---|----|-------------------|
| rs3183927 | NP_057565 | P | S | PS | benign            |
| rs3184504 | NP_005466 | W | R | WR | benign            |
| rs3184516 | NP_071760 | L | H | LH | possibly damaging |
| rs3184994 | NP_653177 | P | S | PS | probably damaging |
| rs3185261 | NP_060647 | D | N | DN | benign            |
| rs3186507 | NP_085911 | I | T | IT | possibly damaging |
| rs3186582 | NP_005547 | L | Q | LQ | probably damaging |
| rs3186754 | NP_066925 | Q | H | QH | benign            |
| rs3186951 | XP_496237 | Q | E | QE | benign            |
| rs3186954 | XP_496237 | V | I | VI | benign            |
| rs3187319 | NP_000574 | A | V | AV | benign            |
| rs3187395 | NP_597816 | E | K | EK | benign            |
| rs3188055 | NP_055752 | N | D | ND | benign            |
| rs3188297 | NP_001889 | K | E | KE | benign            |
| rs3188301 | NP_001889 | D | E | DE | benign            |
| rs3188305 | NP_001889 | R | Q | RQ | benign            |
| rs3188310 | NP_001889 | Q | E | QE | benign            |
| rs3188313 | NP_001889 | V | F | VF | benign            |
| rs3188319 | NP_001889 | N | D | ND | benign            |
| rs3188320 | NP_001889 | R | M | RM | probably damaging |
| rs3188322 | NP_001889 | K | N | KN | benign            |
| rs3188420 | NP_001974 | P | H | PH | probably damaging |
| rs3188420 | NP_973730 | P | H | PH | probably damaging |
| rs3189030 | NP_006166 | S | L | SL | possibly damaging |
| rs3189030 | NP_932326 | S | L | SL | possibly damaging |
| rs3189320 | NP_001173 | A | V | AV | possibly damaging |
| rs3189551 | NP_613258 | A | T | AT | benign            |
| rs3189551 | NP_004884 | A | T | AT | benign            |
| rs3189555 | NP_613258 | D | E | DE | benign            |
| rs3189555 | NP_004884 | D | E | DE | benign            |
| rs3189623 | NP_005753 | D | N | DN | benign            |
| rs3189812 | NP_002676 | R | L | RL | possibly damaging |
| rs3189829 | NP_000292 | R | K | RK | probably damaging |
| rs3190103 | NP_056231 | I | V | IV | benign            |
| rs3190321 | NP_056998 | L | V | LV | benign            |
| rs3190568 | NP_000884 | T | K | TK | possibly damaging |
| rs3190945 | NP_005474 | V | A | VA | benign            |
| rs3190975 | NP_109592 | F | I | FI | benign            |
| rs3190975 | NP_002839 | F | I | FI | benign            |
| rs3190975 | NP_109596 | F | I | FI | benign            |
| rs3190975 | NP_109595 | F | I | FI | possibly damaging |
| rs3191517 | NP_001939 | T | P | TP | probably damaging |
| rs3192023 | NP_002238 | C | G | CG | probably damaging |
| rs3192149 | NP_008958 | Q | K | QK | benign            |
| rs3192151 | NP_008958 | H | P | HP | benign            |
| rs3192152 | NP_008958 | I | T | IT | benign            |

|           |           |   |   |    |                   |
|-----------|-----------|---|---|----|-------------------|
| rs3192433 | NP_005962 | H | P | HP | benign            |
| rs3192433 | NP_068710 | H | P | HP | probably damaging |
| rs3192723 | NP_061914 | V | I | VI | benign            |
| rs3192968 | NP_473363 | R | K | RK | benign            |
| rs3192968 | NP_004278 | R | K | RK | benign            |
| rs3193485 | NP_006855 | F | Y | FY | benign            |
| rs3193487 | NP_006855 | M | V | MV | benign            |
| rs3194051 | NP_002176 | I | V | IV | benign            |
| rs3194194 | NP_066565 | D | A | DA | probably damaging |
| rs3194211 | NP_061931 | R | G | RG | possibly damaging |
| rs3195263 | NP_036443 | L | Q | LQ | benign            |
| rs3195592 | XP_370868 | A | T | AT | benign            |
| rs3195676 | NP_055139 | V | M | VM | benign            |
| rs3195676 | NP_976316 | V | M | VM | benign            |
| rs3195678 | NP_055139 | M | T | MT | benign            |
| rs3197074 | NP_002225 | R | G | RG | probably damaging |
| rs3197821 | NP_060674 | K | N | KN | benign            |
| rs3197999 | NP_066278 | R | C | RC | probably damaging |
| rs3198522 | NP_071760 | E | K | EK | benign            |
| rs3198689 | NP_003567 | P | S | PS | probably damaging |
| rs3198728 | XP_098762 | G | A | GA | benign            |
| rs3198831 | NP_002773 | H | D | HD | possibly damaging |
| rs3198936 | NP_073713 | T | S | TS | benign            |
| rs3198936 | NP_001320 | T | S | TS | possibly damaging |
| rs3199152 | XP_497051 | A | T | AT | benign            |
| rs3199156 | XP_497051 | P | T | PT | possibly damaging |
| rs3199162 | NP_775186 | A | V | AV | benign            |
| rs3199162 | NP_775187 | A | V | AV | benign            |
| rs3199162 | NP_004546 | A | V | AV | benign            |
| rs3199162 | NP_775188 | A | V | AV | benign            |
| rs3199363 | NP_008836 | N | D | ND | benign            |
| rs3199388 | NP_006175 | R | K | RK | benign            |
| rs3199414 | NP_060617 | A | T | AT | benign            |
| rs3200107 | NP_002107 | R | S | RS | benign            |
| rs3200129 | NP_002107 | G | R | GR | benign            |
| rs3200132 | NP_002107 | Q | R | QR | benign            |
| rs3200156 | NP_002107 | D | N | DN | benign            |
| rs3200327 | NP_057100 | A | V | AV | benign            |
| rs3202399 | NP_000541 | E | K | EK | possibly damaging |
| rs3202678 | NP_570924 | F | L | FL | possibly damaging |
| rs3202678 | NP_002841 | F | L | FL | possibly damaging |
| rs3202678 | NP_570923 | F | L | FL | probably damaging |
| rs3202678 | NP_570925 | F | L | FL | probably damaging |
| rs3203210 | NP_001870 | E | Q | EQ | benign            |
| rs3203210 | NP_624302 | E | Q | EQ | benign            |
| rs3203547 | NP_599150 | H | P | HP | probably damaging |

|           |           |   |   |    |                   |
|-----------|-----------|---|---|----|-------------------|
| rs3203575 | NP_002166 | F | I | FI | probably damaging |
| rs3203575 | NP_067091 | F | I | FI | probably damaging |
| rs3203576 | NP_066546 | E | Q | EQ | benign            |
| rs3203576 | NP_067091 | Q | E | QE | benign            |
| rs3203767 | NP_001888 | A | G | AG | benign            |
| rs3203777 | NP_037506 | V | I | VI | benign            |
| rs3203835 | NP_056324 | P | S | PS | benign            |
| rs3203994 | NP_008832 | L | P | LP | possibly damaging |
| rs3203995 | NP_064506 | E | K | EK | benign            |
| rs3204010 | NP_055702 | E | K | EK | benign            |
| rs3204145 | NP_003631 | C | S | CS | probably damaging |
| rs3204398 | NP_862820 | Q | R | QR | possibly damaging |
| rs3204398 | NP_036513 | Q | R | QR | possibly damaging |
| rs3204504 | NP_000468 | A | V | AV | benign            |
| rs3204724 | NP_085125 | T | P | TP | benign            |
| rs3204790 | NP_075390 | V | G | VG | probably damaging |
| rs3204849 | NP_003956 | Y | F | YF | benign            |
| rs3204850 | NP_003956 | I | V | IV | benign            |
| rs3204853 | NP_057097 | R | L | RL | benign            |
| rs3204903 | NP_877416 | P | L | PL | benign            |
| rs3204903 | NP_002484 | P | L | PL | benign            |
| rs3204947 | XP_370939 | E | K | EK | benign            |
| rs3204953 | NP_002903 | V | I | VI | benign            |
| rs3205088 | NP_006466 | F | I | FI | benign            |
| rs3205255 | NP_006786 | G | R | GR | probably damaging |
| rs3205290 | NP_056988 | V | L | VL | benign            |
| rs3205296 | NP_056988 | R | G | RG | possibly damaging |
| rs3205421 | NP_064629 | S | F | SF | benign            |
| rs3205525 | NP_115664 | R | H | RH | benign            |
| rs3205529 | NP_150644 | L | F | LF | possibly damaging |
| rs3205529 | NP_000964 | L | F | LF | possibly damaging |
| rs3205537 | XP_041363 | A | V | AV | benign            |
| rs3205538 | NP_002251 | S | F | SF | benign            |
| rs3205538 | NP_031359 | S | F | SF | benign            |
| rs3205903 | NP_112536 | T | M | TM | benign            |
| rs3205903 | NP_002774 | T | M | TM | benign            |
| rs3205951 | NP_005956 | E | D | ED | benign            |
| rs3205951 | NP_444254 | E | D | ED | benign            |
| rs3205951 | NP_444255 | E | D | ED | benign            |
| rs3205951 | NP_444256 | E | D | ED | benign            |
| rs3205951 | NP_444257 | E | D | ED | benign            |
| rs3205951 | NP_444258 | E | D | ED | benign            |
| rs3205951 | NP_444253 | E | D | ED | benign            |
| rs3206158 | NP_660340 | T | A | TA | benign            |
| rs3206518 | NP_055833 | Q | R | QR | benign            |
| rs3206519 | NP_055833 | N | K | NK | benign            |

|           |           |   |   |    |                   |
|-----------|-----------|---|---|----|-------------------|
| rs3206846 | NP_689509 | D | G | DG | benign            |
| rs3206852 | NP_060264 | T | P | TP | benign            |
| rs3206885 | NP_699200 | S | L | SL | possibly damaging |
| rs3206887 | NP_699200 | S | F | SF | possibly damaging |
| rs3206888 | NP_699200 | L | F | LF | benign            |
| rs3207090 | NP_054772 | T | M | TM | benign            |
| rs3207110 | NP_982287 | H | N | HN | benign            |
| rs3207194 | NP_057711 | H | Q | HQ | benign            |
| rs3207198 | NP_057711 | P | L | PL | probably damaging |
| rs3207199 | NP_057711 | A | T | AT | benign            |
| rs3207388 | NP_002772 | M | L | ML | benign            |
| rs3207389 | NP_002772 | E | K | EK | benign            |
| rs3207390 | NP_002772 | P | S | PS | benign            |
| rs3207391 | NP_002772 | S | T | ST | benign            |
| rs3207392 | NP_002772 | G | R | GR | benign            |
| rs3207393 | NP_002772 | R | L | RL | benign            |
| rs3207394 | NP_002772 | I | T | IT | benign            |
| rs3207461 | NP_064551 | P | H | PH | benign            |
| rs3207640 | NP_116559 | E | K | EK | benign            |
| rs3207640 | NP_002898 | E | K | EK | benign            |
| rs3207786 | NP_079038 | Q | R | QR | possibly damaging |
| rs3207817 | NP_005956 | S | P | SP | benign            |
| rs3207817 | NP_444254 | S | P | SP | benign            |
| rs3207817 | NP_444255 | S | P | SP | benign            |
| rs3207817 | NP_444256 | S | P | SP | benign            |
| rs3207817 | NP_444257 | S | P | SP | benign            |
| rs3207817 | NP_444258 | S | P | SP | benign            |
| rs3207817 | NP_444253 | S | P | SP | benign            |
| rs3207898 | NP_995317 | V | I | VI | benign            |
| rs3207901 | NP_995317 | V | A | VA | benign            |
| rs3207905 | NP_995317 | H | R | HR | benign            |
| rs3207962 | NP_112536 | R | C | RC | probably damaging |
| rs3207997 | NP_938190 | M | L | ML | possibly damaging |
| rs3207997 | NP_938192 | M | L | ML | possibly damaging |
| rs3207997 | NP_938193 | M | L | ML | possibly damaging |
| rs3207997 | NP_938194 | M | L | ML | possibly damaging |
| rs3207997 | NP_938201 | M | L | ML | possibly damaging |
| rs3207997 | NP_938406 | M | L | ML | possibly damaging |
| rs3208002 | NP_002776 | I | V | IV | benign            |
| rs3208002 | NP_976032 | I | V | IV | benign            |
| rs3208003 | NP_002776 | R | K | RK | benign            |
| rs3208003 | NP_976032 | R | K | RK | benign            |
| rs3208004 | NP_002776 | L | I | LI | benign            |
| rs3208004 | NP_976032 | L | I | LI | benign            |
| rs3208008 | NP_057518 | Q | H | QH | benign            |
| rs3208008 | NP_116575 | Q | H | QH | benign            |

|           |           |   |   |    |                   |
|-----------|-----------|---|---|----|-------------------|
| rs3208188 | NP_037530 | Q | E | QE | benign            |
| rs3208189 | NP_037530 | F | L | FL | possibly damaging |
| rs3208192 | NP_037530 | R | K | RK | benign            |
| rs3208193 | NP_037530 | K | N | KN | benign            |
| rs3208194 | NP_037530 | K | R | KR | benign            |
| rs3208195 | NP_037530 | K | Q | KQ | benign            |
| rs3208196 | NP_037530 | M | I | MI | benign            |
| rs3208197 | NP_037530 | N | D | ND | benign            |
| rs3208198 | NP_037530 | F | L | FL | benign            |
| rs3208199 | NP_037530 | K | R | KR | benign            |
| rs3208200 | NP_037530 | S | R | SR | benign            |
| rs3208203 | NP_037530 | S | T | ST | benign            |
| rs3208206 | NP_037530 | T | S | TS | benign            |
| rs3208208 | NP_037530 | K | Q | KQ | benign            |
| rs3208210 | NP_037530 | Q | E | QE | benign            |
| rs3208212 | NP_037530 | S | P | SP | possibly damaging |
| rs3208319 | NP_054733 | L | M | LM | benign            |
| rs3208329 | NP_998839 | R | Q | RQ | benign            |
| rs3208363 | NP_059488 | S | A | SA | benign            |
| rs3208371 | NP_115850 | V | L | VL | benign            |
| rs3208539 | NP_000347 | A | T | AT | benign            |
| rs3208599 | NP_000250 | T | A | TA | possibly damaging |
| rs3208659 | NP_001247 | N | H | NH | benign            |
| rs3208794 | NP_037366 | A | D | AD | benign            |
| rs3208856 | NP_036248 | Y | H | YH | benign            |
| rs3208983 | NP_434698 | E | K | EK | benign            |
| rs3208983 | NP_005789 | E | K | EK | benign            |
| rs3208983 | NP_998755 | E | K | EK | benign            |
| rs3209055 | NP_660340 | T | I | TI | benign            |
| rs3209058 | NP_660340 | N | H | NH | benign            |
| rs3209081 | NP_005328 | P | H | PH | probably damaging |
| rs3209183 | XP_371402 | Q | K | QK | benign            |
| rs3209255 | NP_001855 | Q | L | QL | possibly damaging |
| rs3209257 | NP_001855 | L | V | LV | benign            |
| rs3209289 | NP_057400 | E | K | EK | benign            |
| rs3209388 | NP_001001 | E | G | EG | probably damaging |
| rs3209404 | NP_057229 | P | A | PA | probably damaging |
| rs3209445 | NP_000984 | D | G | DG | benign            |
| rs3209486 | NP_056955 | E | K | EK | benign            |
| rs3209604 | NP_001006 | H | Q | HQ | probably damaging |
| rs3209642 | NP_057733 | I | T | IT | benign            |
| rs3209829 | NP_981944 | S | F | SF | benign            |
| rs3209829 | NP_981946 | S | F | SF | benign            |
| rs3209829 | NP_005554 | S | F | SF | benign            |
| rs3209855 | NP_219483 | W | R | WR | probably damaging |
| rs3209908 | NP_055423 | P | A | PA | possibly damaging |

|           |           |   |   |    |                   |
|-----------|-----------|---|---|----|-------------------|
| rs3210073 | NP_004993 | V | D | VD | possibly damaging |
| rs3210074 | NP_004993 | P | S | PS | probably damaging |
| rs3210075 | NP_004993 | I | T | IT | benign            |
| rs3210076 | NP_004993 | K | T | KT | possibly damaging |
| rs3210077 | NP_004993 | K | N | KN | possibly damaging |
| rs3210078 | NP_004993 | P | S | PS | possibly damaging |
| rs3210080 | NP_004993 | G | S | GS | possibly damaging |
| rs3210084 | NP_004993 | P | L | PL | probably damaging |
| rs3210107 | NP_000005 | L | Q | LQ | possibly damaging |
| rs3210154 | NP_000468 | A | T | AT | benign            |
| rs3210155 | NP_004231 | K | R | KR | benign            |
| rs3210158 | NP_066299 | E | K | EK | possibly damaging |
| rs3210158 | NP_524148 | E | K | EK | possibly damaging |
| rs3210158 | NP_524147 | E | K | EK | possibly damaging |
| rs3210163 | NP_000468 | Q | L | QL | probably damaging |
| rs3210165 | NP_787059 | G | V | GV | probably damaging |
| rs3210165 | NP_065783 | G | V | GV | probably damaging |
| rs3210165 | NP_059989 | G | V | GV | probably damaging |
| rs3210169 | NP_000909 | T | R | TR | probably damaging |
| rs3210199 | NP_060732 | E | K | EK | benign            |
| rs3210199 | NP_443711 | E | K | EK | benign            |
| rs3210199 | NP_443716 | E | K | EK | benign            |
| rs3210199 | NP_443715 | E | K | EK | benign            |
| rs3210200 | NP_060732 | N | D | ND | benign            |
| rs3210200 | NP_443711 | N | D | ND | benign            |
| rs3210200 | NP_443716 | N | D | ND | benign            |
| rs3210200 | NP_443715 | N | D | ND | benign            |
| rs3210210 | NP_000468 | L | R | LR | possibly damaging |
| rs3210214 | NP_031372 | L | P | LP | benign            |
| rs3210215 | NP_031372 | G | C | GC | benign            |
| rs3210216 | NP_031372 | G | S | GS | benign            |
| rs3210291 | NP_001890 | D | N | DN | benign            |
| rs3210291 | NP_001889 | N | D | ND | possibly damaging |
| rs3210299 | NP_036272 | L | R | LR | benign            |
| rs3210400 | NP_057594 | T | A | TA | benign            |
| rs3210501 | NP_055613 | F | S | FS | benign            |
| rs3210501 | XP_496237 | S | F | SF | possibly damaging |
| rs3210502 | NP_055613 | E | K | EK | benign            |
| rs3210583 | NP_064530 | G | D | GD | probably damaging |
| rs3210584 | NP_064530 | N | D | ND | possibly damaging |
| rs3210653 | NP_060544 | M | L | ML | possibly damaging |
| rs3210720 | NP_619580 | R | P | RP | possibly damaging |
| rs3210732 | NP_060647 | H | N | HN | probably damaging |
| rs3210813 | XP_496238 | A | V | AV | benign            |
| rs3210849 | NP_057682 | H | Q | HQ | possibly damaging |
| rs3210905 | NP_056093 | D | Y | DY | possibly damaging |

|           |           |   |   |    |                   |
|-----------|-----------|---|---|----|-------------------|
| rs3210908 | NP_068577 | R | Q | RQ | benign            |
| rs3210928 | NP_061327 | A | G | AG | benign            |
| rs3210928 | NP_872289 | A | G | AG | benign            |
| rs3210928 | NP_057227 | A | G | AG | benign            |
| rs3210961 | NP_955474 | Q | H | QH | benign            |
| rs3210961 | NP_955476 | Q | H | QH | benign            |
| rs3210961 | NP_009194 | Q | H | QH | possibly damaging |
| rs3210978 | NP_647475 | F | I | FI | benign            |
| rs3210979 | NP_647475 | F | S | FS | benign            |
| rs3210981 | NP_647475 | E | D | ED | benign            |
| rs3210982 | NP_647475 | A | S | AS | benign            |
| rs3210983 | NP_647475 | A | V | AV | benign            |
| rs3210984 | NP_647475 | S | T | ST | benign            |
| rs3211042 | NP_056111 | I | T | IT | possibly damaging |
| rs3211095 | NP_060493 | Q | H | QH | possibly damaging |
| rs3211135 | NP_059429 | E | D | ED | benign            |
| rs3211135 | NP_036560 | E | D | ED | benign            |
| rs3211227 | NP_003301 | P | L | PL | probably damaging |
| rs3211263 | NP_068592 | S | R | SR | benign            |
| rs3211277 | NP_037399 | L | F | LF | benign            |
| rs3211366 | NP_000758 | H | R | HR | benign            |
| rs3211367 | NP_000758 | T | N | TN | possibly damaging |
| rs3211369 | NP_000758 | M | V | MV | benign            |
| rs3211371 | NP_000758 | R | C | RC | benign            |
| rs3211612 | NP_000066 | R | Q | RQ | possibly damaging |
| rs3211772 | NP_000495 | A | T | AT | benign            |
| rs3211783 | NP_000495 | G | R | GR | benign            |
| rs3211977 | NP_002519 | S | L | SL | possibly damaging |
| rs3212057 | NP_005423 | R | H | RH | benign            |
| rs3212151 | NP_116764 | S | A | SA | benign            |
| rs3212285 | NP_004644 | T | S | TS | benign            |
| rs3212291 | NP_004645 | S | C | SC | benign            |
| rs3212292 | NP_004645 | L | H | LH | possibly damaging |
| rs3212293 | NP_872600 | E | D | ED | benign            |
| rs3212293 | NP_872601 | E | D | ED | benign            |
| rs3212293 | NP_009056 | E | D | ED | benign            |
| rs3212365 | NP_002377 | V | L | VL | benign            |
| rs3212366 | NP_002377 | F | L | FL | possibly damaging |
| rs3212557 | NP_002194 | N | K | NK | benign            |
| rs3212645 | NP_002194 | K | Q | KQ | benign            |
| rs3212723 | NP_000206 | P | T | PT | possibly damaging |
| rs3212805 | NP_612630 | P | L | PL | benign            |
| rs3212805 | NP_059979 | P | L | PL | benign            |
| rs3212977 | NP_001974 | A | T | AT | benign            |
| rs3212977 | NP_973730 | A | T | AT | benign            |
| rs3212989 | NP_036231 | T | A | TA | benign            |



|           |           |   |   |    |                   |
|-----------|-----------|---|---|----|-------------------|
| rs3213096 | NP_002178 | V | I | VI | benign            |
| rs3213119 | NP_002178 | V | F | VF | possibly damaging |
| rs3213172 | NP_005216 | R | H | RH | possibly damaging |
| rs3213173 | NP_005216 | V | M | VM | benign            |
| rs3213174 | NP_005216 | T | N | TN | benign            |
| rs3213176 | NP_005216 | G | S | GS | possibly damaging |
| rs3213190 | NP_002499 | R | Q | RQ | benign            |
| rs3213409 | NP_000206 | V | I | VI | benign            |
| rs3213422 | NP_001352 | K | Q | KQ | benign            |
| rs3213439 | NP_001657 | R | Q | RQ | benign            |
| rs3213445 | NP_689453 | I | V | IV | benign            |
| rs3213445 | NP_689452 | I | V | IV | benign            |
| rs3213502 | NP_005298 | A | T | AT | benign            |
| rs3213502 | NP_892027 | A | T | AT | benign            |
| rs3213511 | NP_071895 | R | W | RW | probably damaging |
| rs3213542 | NP_006819 | V | M | VM | benign            |
| rs3213549 | NP_055324 | E | K | EK | benign            |
| rs3213606 | NP_004306 | I | V | IV | benign            |
| rs3213608 | NP_068775 | V | I | VI | benign            |
| rs3213608 | NP_786944 | V | I | VI | benign            |
| rs3213633 | NP_061331 | K | Q | KQ | benign            |
| rs3213641 | NP_071433 | V | M | VM | benign            |
| rs3213642 | NP_620166 | R | C | RC | possibly damaging |
| rs3213688 | XP_375408 | V | M | VM | benign            |
| rs3213690 | NP_057711 | D | N | DN | benign            |
| rs3213746 | NP_005751 | P | S | PS | possibly damaging |
| rs3213758 | XP_051197 | D | N | DN | benign            |
| rs3213760 | NP_004516 | R | H | RH | benign            |
| rs3213764 | NP_060649 | K | R | KR | benign            |
| rs3213770 | NP_001337 | R | W | RW | possibly damaging |
| rs3213790 | NP_038478 | L | S | LS | possibly damaging |
| rs3213826 | NP_114109 | G | V | GV | benign            |
| rs3213831 | NP_002855 | S | N | SN | possibly damaging |
| rs3213832 | NP_002855 | V | M | VM | benign            |
| rs3213837 | NP_061165 | S | L | SL | possibly damaging |
| rs3213869 | NP_004726 | Q | R | QR | benign            |
| rs3213906 | NP_001320 | I | V | IV | benign            |
| rs3213906 | NP_073713 | I | V | IV | benign            |
| rs3213941 | NP_060350 | Q | P | QP | benign            |
| rs3213971 | NP_079107 | I | V | IV | benign            |
| rs3213979 | XP_295213 | P | S | PS | probably damaging |
| rs3213980 | XP_295213 | R | H | RH | possibly damaging |
| rs3213981 | XP_295213 | P | S | PS | probably damaging |
| rs3213982 | XP_295213 | F | S | FS | possibly damaging |
| rs3214033 | NP_005984 | S | N | SN | benign            |
| rs3214045 | XP_496694 | I | L | IL | benign            |

|           |           |   |   |    |                   |
|-----------|-----------|---|---|----|-------------------|
| rs3217921 | NP_001750 | G | R | GR | benign            |
| rs3218089 | NP_001751 | P | S | PS | probably damaging |
| rs3218170 | NP_004082 | G | R | GR | benign            |
| rs3218171 | NP_004082 | Q | H | QH | benign            |
| rs3218273 | NP_000869 | S | F | SF | benign            |
| rs3218536 | NP_005422 | R | H | RH | benign            |
| rs3218537 | NP_005422 | I | T | IT | benign            |
| rs3218569 | NP_068739 | P | L | PL | benign            |
| rs3218570 | NP_068739 | R | T | RT | benign            |
| rs3218572 | NP_002903 | Q | P | QP | benign            |
| rs3218578 | NP_002903 | T | P | TP | benign            |
| rs3218579 | NP_002903 | Q | P | QP | benign            |
| rs3218582 | NP_002903 | S | L | SL | benign            |
| rs3218585 | NP_002903 | D | N | DN | benign            |
| rs3218592 | NP_002903 | R | Q | RQ | benign            |
| rs3218593 | NP_002903 | M | T | MT | benign            |
| rs3218595 | NP_002903 | Q | H | QH | benign            |
| rs3218597 | NP_002903 | S | T | ST | benign            |
| rs3218598 | NP_002903 | S | G | SG | benign            |
| rs3218599 | NP_002903 | D | H | DH | benign            |
| rs3218600 | NP_002903 | S | L | SL | benign            |
| rs3218604 | NP_002903 | G | R | GR | possibly damaging |
| rs3218606 | NP_002903 | R | H | RH | benign            |
| rs3218611 | NP_690610 | T | I | TI | benign            |
| rs3218611 | NP_000034 | T | I | TI | benign            |
| rs3218614 | NP_690610 | T | I | TI | benign            |
| rs3218614 | NP_690611 | T | I | TI | benign            |
| rs3218614 | NP_000034 | T | I | TI | benign            |
| rs3218619 | NP_690610 | A | T | AT | benign            |
| rs3218619 | NP_690611 | A | T | AT | benign            |
| rs3218619 | NP_690612 | A | T | AT | benign            |
| rs3218619 | NP_690613 | A | T | AT | benign            |
| rs3218619 | NP_690614 | A | T | AT | benign            |
| rs3218619 | NP_690615 | A | T | AT | benign            |
| rs3218619 | NP_690616 | A | T | AT | benign            |
| rs3218619 | NP_000034 | A | T | AT | benign            |
| rs3218622 | NP_000954 | R | H | RH | benign            |
| rs3218625 | NP_000954 | G | R | GR | benign            |
| rs3218631 | NP_006587 | I | V | IV | benign            |
| rs3218631 | NP_955452 | I | V | IV | benign            |
| rs3218632 | NP_006587 | T | A | TA | benign            |
| rs3218632 | NP_955452 | T | A | TA | benign            |
| rs3218633 | NP_006587 | E | A | EA | benign            |
| rs3218633 | NP_955452 | E | A | EA | possibly damaging |
| rs3218634 | NP_006587 | L | V | LV | benign            |
| rs3218634 | NP_955452 | L | V | LV | benign            |

|           |           |   |   |    |                   |
|-----------|-----------|---|---|----|-------------------|
| rs3218635 | NP_006587 | E | K | EK | benign            |
| rs3218635 | NP_955452 | E | K | EK | benign            |
| rs3218636 | NP_006587 | S | G | SG | benign            |
| rs3218636 | NP_955452 | S | G | SG | benign            |
| rs3218637 | NP_006587 | R | Q | RQ | benign            |
| rs3218637 | NP_955452 | R | Q | RQ | benign            |
| rs3218639 | NP_006587 | Q | H | QH | benign            |
| rs3218639 | NP_955452 | Q | H | QH | possibly damaging |
| rs3218640 | NP_006587 | G | E | GE | possibly damaging |
| rs3218640 | NP_955452 | G | E | GE | probably damaging |
| rs3218642 | NP_006587 | P | T | PT | possibly damaging |
| rs3218642 | NP_955452 | P | T | PT | possibly damaging |
| rs3218643 | NP_006587 | D | Y | DY | probably damaging |
| rs3218643 | NP_955452 | D | Y | DY | probably damaging |
| rs3218644 | NP_006587 | D | G | DG | benign            |
| rs3218644 | NP_955452 | D | G | DG | benign            |
| rs3218648 | NP_006587 | V | I | VI | benign            |
| rs3218648 | NP_955452 | V | I | VI | benign            |
| rs3218649 | NP_006587 | T | R | TR | benign            |
| rs3218649 | NP_955452 | T | R | TR | possibly damaging |
| rs3218651 | NP_006587 | H | R | HR | possibly damaging |
| rs3218651 | NP_955452 | H | R | HR | possibly damaging |
| rs3218652 | NP_006587 | H | Q | HQ | benign            |
| rs3218652 | NP_955452 | H | Q | HQ | benign            |
| rs3218670 | NP_000042 | R | Q | RQ | benign            |
| rs3218670 | NP_612149 | R | Q | RQ | possibly damaging |
| rs3218673 | NP_000042 | P | S | PS | benign            |
| rs3218680 | NP_612149 | G | S | GS | possibly damaging |
| rs3218680 | NP_000042 | G | S | GS | possibly damaging |
| rs3218684 | NP_000042 | R | W | RW | probably damaging |
| rs3218688 | NP_000042 | L | F | LF | benign            |
| rs3218695 | NP_000042 | D | E | DE | benign            |
| rs3218707 | NP_000042 | V | L | VL | benign            |
| rs3218708 | NP_000042 | T | M | TM | benign            |
| rs3218713 | NP_000248 | R | Q | RQ | probably damaging |
| rs3218714 | NP_000248 | R | W | RW | probably damaging |
| rs3218715 | NP_000248 | E | K | EK | benign            |
| rs3218716 | NP_000248 | A | T | AT | benign            |
| rs3218721 | NP_112190 | A | V | AV | benign            |
| rs3218725 | NP_112190 | A | V | AV | benign            |
| rs3218727 | NP_112190 | R | C | RC | probably damaging |
| rs3218729 | NP_112190 | E | A | EA | possibly damaging |
| rs3218744 | NP_055136 | R | W | RW | possibly damaging |
| rs3218745 | NP_055136 | P | Q | PQ | probably damaging |
| rs3218750 | NP_002682 | R | H | RH | possibly damaging |
| rs3218772 | NP_002682 | W | R | WR | benign            |

|           |           |   |   |    |                   |
|-----------|-----------|---|---|----|-------------------|
| rs3218775 | NP_002682 | R | H | RH | benign            |
| rs3218778 | NP_009126 | R | G | RG | possibly damaging |
| rs3218783 | NP_009126 | E | K | EK | benign            |
| rs3218784 | NP_009126 | I | M | IM | benign            |
| rs3218786 | NP_009126 | F | S | FS | possibly damaging |
| rs3218787 | NP_009126 | C | R | CR | probably damaging |
| rs3218820 | XP_378195 | R | Q | RQ | possibly damaging |
| rs3218976 | NP_775465 | E | K | EK | benign            |
| rs3219012 | NP_058212 | A | V | AV | benign            |
| rs3219012 | NP_058213 | A | V | AV | benign            |
| rs3219012 | NP_058214 | A | V | AV | benign            |
| rs3219012 | NP_058437 | A | V | AV | benign            |
| rs3219012 | NP_058438 | A | V | AV | benign            |
| rs3219012 | NP_002533 | A | V | AV | benign            |
| rs3219013 | NP_058213 | Y | H | YH | benign            |
| rs3219014 | NP_002533 | D | N | DN | possibly damaging |
| rs3219057 | NP_001609 | V | I | VI | benign            |
| rs3219062 | NP_001609 | S | Y | SY | possibly damaging |
| rs3219145 | NP_001609 | R | K | RK | benign            |
| rs3219154 | NP_065970 | I | V | IV | benign            |
| rs3219155 | NP_065970 | E | K | EK | benign            |
| rs3219156 | NP_065970 | V | M | VM | benign            |
| rs3219457 | NP_002682 | R | Q | RQ | benign            |
| rs3219484 | NP_036354 | V | M | VM | benign            |
| rs3219489 | NP_036354 | Q | H | QH | benign            |
| rs3219494 | NP_036354 | G | E | GE | possibly damaging |
| rs3219496 | NP_036354 | L | M | LM | benign            |
| rs3219497 | NP_036354 | R | Q | RQ | benign            |
| rs3729696 | NP_006210 | D | A | DA | probably damaging |
| rs3729712 | NP_000354 | R | C | RC | probably damaging |
| rs3729717 | NP_695024 | R | Q | RQ | benign            |
| rs3729717 | NP_000616 | R | Q | RQ | benign            |
| rs3729730 | NP_000898 | S | N | SN | benign            |
| rs3729730 | NP_003986 | S | N | SN | benign            |
| rs3729731 | NP_000898 | S | I | SI | benign            |
| rs3729731 | NP_003986 | S | I | SI | benign            |
| rs3729734 | NP_002301 | H | Y | HY | benign            |
| rs3729740 | NP_002301 | D | N | DN | benign            |
| rs3729744 | NP_002301 | S | L | SL | possibly damaging |
| rs3729754 | NP_004378 | P | L | PL | probably damaging |
| rs3729778 | NP_006210 | V | G | VG | probably damaging |
| rs3729781 | NP_006210 | S | N | SN | benign            |
| rs3729782 | NP_006210 | E | K | EK | benign            |
| rs3729799 | NP_000247 | R | W | RW | probably damaging |
| rs3729813 | NP_000248 | K | N | KN | probably damaging |
| rs3729823 | NP_000248 | S | C | SC | benign            |

|           |           |   |   |    |                   |
|-----------|-----------|---|---|----|-------------------|
| rs3729856 | NP_002043 | S | G | SG | benign            |
| rs3729873 | NP_002727 | D | H | DH | probably damaging |
| rs3729881 | NP_002727 | E | D | ED | benign            |
| rs3729895 | NP_002729 | S | I | SI | benign            |
| rs3729895 | NP_997700 | S | I | SI | possibly damaging |
| rs3729929 | NP_002871 | E | Q | EQ | possibly damaging |
| rs3729933 | NP_116784 | A | S | AS | benign            |
| rs3729938 | NP_004378 | S | C | SC | probably damaging |
| rs3729943 | NP_000015 | S | C | SC | benign            |
| rs3729946 | NP_000247 | T | K | TK | benign            |
| rs3729950 | NP_000247 | L | M | LM | benign            |
| rs3729952 | NP_000247 | A | V | AV | benign            |
| rs3729960 | NP_002175 | G | R | GR | benign            |
| rs3729960 | NP_786943 | G | R | GR | possibly damaging |
| rs3729961 | NP_002175 | L | V | LV | benign            |
| rs3729977 | NP_000677 | Y | H | YH | benign            |
| rs3729979 | NP_000677 | P | L | PL | possibly damaging |
| rs3729986 | NP_000247 | V | M | VM | benign            |
| rs3729989 | NP_000247 | S | G | SG | benign            |
| rs3729993 | NP_000248 | D | A | DA | probably damaging |
| rs3730017 | NP_695024 | R | W | RW | benign            |
| rs3730017 | NP_000616 | R | W | RW | benign            |
| rs3730025 | NP_000780 | Y | C | YC | probably damaging |
| rs3730027 | NP_000780 | P | L | PL | probably damaging |
| rs3730043 | NP_690044 | T | M | TM | possibly damaging |
| rs3730043 | NP_000780 | T | M | TM | possibly damaging |
| rs3730043 | NP_690043 | T | M | TM | possibly damaging |
| rs3730071 | NP_066193 | A | S | AS | benign            |
| rs3730071 | NP_056085 | A | S | AS | benign            |
| rs3730089 | NP_852556 | M | I | MI | benign            |
| rs3730089 | NP_852665 | M | I | MI | benign            |
| rs3730089 | NP_852664 | M | I | MI | possibly damaging |
| rs3730091 | NP_852556 | D | A | DA | possibly damaging |
| rs3730091 | NP_852665 | D | A | DA | possibly damaging |
| rs3730091 | NP_852664 | D | A | DA | probably damaging |
| rs3730195 | NP_000609 | G | E | GE | benign            |
| rs3730230 | NP_695024 | D | H | DH | benign            |
| rs3730230 | NP_000616 | D | H | DH | benign            |
| rs3730238 | NP_000355 | K | R | KR | benign            |
| rs3730247 | NP_150645 | K | R | KR | benign            |
| rs3730247 | NP_150647 | K | R | KR | benign            |
| rs3730247 | NP_000671 | K | R | KR | benign            |
| rs3730271 | NP_002871 | S | P | SP | benign            |
| rs3730273 | NP_002871 | M | V | MV | probably damaging |
| rs3730287 | NP_150645 | G | R | GR | benign            |
| rs3730287 | NP_000671 | G | R | GR | benign            |

|           |           |   |   |    |                   |
|-----------|-----------|---|---|----|-------------------|
| rs3730287 | NP_150647 | G | R | GR | possibly damaging |
| rs3730293 | NP_002175 | I | T | IT | benign            |
| rs3730294 | NP_002175 | Y | F | YF | benign            |
| rs3730307 | NP_066193 | G | S | GS | benign            |
| rs3730307 | NP_056085 | G | S | GS | benign            |
| rs3730386 | NP_002723 | H | D | HD | probably damaging |
| rs3730458 | NP_056263 | D | A | DA | probably damaging |
| rs3730463 | NP_037406 | T | P | TP | benign            |
| rs3730477 | NP_037406 | R | W | RW | possibly damaging |
| rs3730823 | NP_009126 | H | R | HR | possibly damaging |
| rs3730855 | NP_000225 | A | V | AV | benign            |
| rs3730863 | NP_000225 | R | W | RW | benign            |
| rs3730911 | NP_000225 | G | E | GE | benign            |
| rs3730933 | NP_000225 | N | S | NS | possibly damaging |
| rs3730947 | NP_000225 | V | M | VM | benign            |
| rs3730966 | NP_000225 | V | I | VI | benign            |
| rs3730980 | NP_000225 | M | V | MV | benign            |
| rs3731003 | NP_000225 | T | I | TI | possibly damaging |
| rs3731008 | NP_000225 | R | L | RL | possibly damaging |
| rs3731190 | NP_478102 | P | S | PS | possibly damaging |
| rs3731249 | NP_000068 | A | T | AT | benign            |
| rs3731410 | NP_001265 | R | Q | RQ | possibly damaging |
| rs3731499 | NP_963861 | S | F | SF | benign            |
| rs3731499 | NP_001780 | S | F | SF | possibly damaging |
| rs3731594 | NP_005535 | D | N | DN | benign            |
| rs3731600 | NP_002971 | A | P | AP | benign            |
| rs3731620 | NP_079479 | T | M | TM | benign            |
| rs3731625 | NP_062541 | I | T | IT | probably damaging |
| rs3731625 | NP_006268 | I | T | IT | probably damaging |
| rs3731644 | NP_055336 | M | T | MT | benign            |
| rs3731646 | NP_055336 | A | T | AT | benign            |
| rs3731722 | NP_001150 | H | R | HR | benign            |
| rs3731762 | NP_008853 | D | N | DN | benign            |
| rs3731764 | NP_079245 | T | M | TM | benign            |
| rs3731824 | NP_003887 | H | R | HR | possibly damaging |
| rs3731844 | XP_165448 | E | K | EK | possibly damaging |
| rs3731845 | XP_165448 | S | R | SR | possibly damaging |
| rs3731847 | NP_071769 | W | R | WR | possibly damaging |
| rs3731875 | NP_055455 | L | P | LP | benign            |
| rs3731877 | NP_055455 | E | Q | EQ | benign            |
| rs3731880 | XP_050846 | R | C | RC | benign            |
| rs3731891 | NP_079295 | R | C | RC | probably damaging |
| rs3731892 | NP_079295 | K | R | KR | benign            |
| rs3731893 | NP_079295 | T | M | TM | benign            |
| rs3731894 | NP_079295 | R | W | RW | possibly damaging |
| rs3731900 | NP_077269 | Q | P | QP | possibly damaging |

|           |           |   |   |    |                   |
|-----------|-----------|---|---|----|-------------------|
| rs3731958 | NP_078935 | M | I | MI | benign            |
| rs3731969 | NP_006785 | L | V | LV | benign            |
| rs3731971 | NP_665862 | W | C | WC | probably damaging |
| rs3732083 | NP_005270 | I | V | IV | benign            |
| rs3732204 | NP_060439 | E | G | EG | possibly damaging |
| rs3732215 | NP_060880 | C | S | CS | probably damaging |
| rs3732235 | NP_055312 | N | S | NS | benign            |
| rs3732240 | NP_005782 | L | M | LM | benign            |
| rs3732287 | NP_038478 | P | L | PL | probably damaging |
| rs3732299 | NP_000180 | Q | H | QH | benign            |
| rs3732305 | NP_060621 | R | G | RG | benign            |
| rs3732309 | NP_004534 | G | E | GE | benign            |
| rs3732378 | NP_001328 | T | M | TM | benign            |
| rs3732379 | NP_001328 | V | I | VI | benign            |
| rs3732380 | NP_001328 | V | I | VI | benign            |
| rs3732383 | NP_919269 | G | R | GR | benign            |
| rs3732401 | NP_005504 | P | S | PS | possibly damaging |
| rs3732407 | NP_004478 | T | S | TS | benign            |
| rs3732410 | NP_004478 | Y | C | YC | probably damaging |
| rs3732413 | XP_291085 | G | S | GS | benign            |
| rs3732452 | NP_079003 | A | E | AE | benign            |
| rs3732466 | NP_004479 | G | R | GR | benign            |
| rs3732477 | XP_209550 | A | T | AT | benign            |
| rs3732485 | NP_444254 | R | C | RC | possibly damaging |
| rs3732485 | NP_444255 | R | C | RC | possibly damaging |
| rs3732485 | NP_444256 | R | C | RC | possibly damaging |
| rs3732485 | NP_444257 | R | C | RC | possibly damaging |
| rs3732485 | NP_444253 | R | C | RC | possibly damaging |
| rs3732486 | NP_444254 | L | P | LP | benign            |
| rs3732486 | NP_444255 | L | P | LP | benign            |
| rs3732486 | NP_444256 | L | P | LP | benign            |
| rs3732486 | NP_444257 | L | P | LP | benign            |
| rs3732486 | NP_444253 | L | P | LP | benign            |
| rs3732487 | NP_444254 | D | E | DE | benign            |
| rs3732487 | NP_444255 | D | E | DE | benign            |
| rs3732487 | NP_444256 | D | E | DE | benign            |
| rs3732487 | NP_444257 | D | E | DE | benign            |
| rs3732487 | NP_444253 | D | E | DE | benign            |
| rs3732498 | NP_078904 | R | W | RW | probably damaging |
| rs3732507 | NP_062455 | K | R | KR | benign            |
| rs3732530 | NP_006565 | V | G | VG | benign            |
| rs3732559 | XP_209569 | E | A | EA | possibly damaging |
| rs3732576 | NP_004712 | R | H | RH | benign            |
| rs3732581 | NP_061092 | V | L | VL | benign            |
| rs3732602 | NP_055893 | F | S | FS | benign            |
| rs3732671 | NP_079199 | I | V | IV | benign            |

|           |              |   |   |    |                   |
|-----------|--------------|---|---|----|-------------------|
| rs3732675 | XP_371617    | S | P | SP | probably damaging |
| rs3732678 | XP_371617    | H | P | HP | possibly damaging |
| rs3732710 | NP_937795    | T | M | TM | benign            |
| rs3732756 | NP_037440    | V | I | VI | benign            |
| rs3732765 | NP_443728    | R | Q | RQ | benign            |
| rs3732775 | NP_849144    | R | W | RW | possibly damaging |
| rs3732782 | NP_009067    | D | A | DA | possibly damaging |
| rs3732791 | NP_387508    | R | C | RC | possibly damaging |
| rs3732795 | NP_060169    | I | N | IN | possibly damaging |
| rs3732813 | NP_056227    | T | A | TA | benign            |
| rs3732858 | XP_046264    | G | S | GS | benign            |
| rs3732867 | XP_172341    | A | T | AT | benign            |
| rs3732880 | NP_000046    | P | S | PS | probably damaging |
| rs3732978 | NP_055665    | V | M | VM | benign            |
| rs3733008 | NP_000403    | D | G | DG | possibly damaging |
| rs3733011 | NP_000403    | I | T | IT | benign            |
| rs3733055 | NP_004615    | R | L | RL | probably damaging |
| rs3733082 | NP_075050    | T | I | TI | benign            |
| rs3733085 | NP_001398    | A | P | AP | benign            |
| rs3733088 | NP_001398    | K | E | KE | benign            |
| rs3733092 | NP_878906    | G | A | GA | benign            |
| rs3733092 | NP_071737    | G | A | GA | possibly damaging |
| rs3733092 | NP_878905    | G | A | GA | possibly damaging |
| rs3733100 | NP_078789    | A | G | AG | benign            |
| rs3733113 | NP_055055    | G | R | GR | benign            |
| rs3733124 | NP_000324    | I | V | IV | benign            |
| rs3733136 | NP_002438    | G | S | GS | benign            |
| rs3733139 | NP_002198    | G | S | GS | benign            |
| rs3733167 | NP_001239    | L | F | LF | benign            |
| rs3733182 | NP_060871    | R | G | RG | benign            |
| rs3733197 | NP_060405    | A | T | AT | benign            |
| rs3733242 | NP_065910    | L | P | LP | possibly damaging |
| rs3733245 | NP_065910    | R | W | RW | probably damaging |
| rs3733306 | NP_115689    | A | S | AS | benign            |
| rs3733307 | NP_115689    | T | S | TS | benign            |
| rs3733319 | NP_689991    | A | V | AV | benign            |
| rs3733378 | NP_005926    | P | A | PA | possibly damaging |
| rs3733391 | NP_079102    | W | R | WR | benign            |
| rs3733402 | NP_000883    | N | S | NS | possibly damaging |
| rs3733526 | NP_237223    | V | A | VA | benign            |
| rs3733526 | NP_246273    | V | A | VA | benign            |
| rs3733538 | NP_061859    | R | Q | RQ | benign            |
| rs3733549 | NP_001192    | R | Q | RQ | benign            |
| rs3733591 | NP_064425    | R | H | RH | possibly damaging |
| rs3733591 | NP_001001290 | R | H | RH | possibly damaging |
| rs3733641 | XP_106386    | G | S | GS | possibly damaging |



|           |           |   |   |    |                   |
|-----------|-----------|---|---|----|-------------------|
| rs3733662 | XP_371776 | P | T | PT | benign            |
| rs3733693 | NP_061993 | I | T | IT | benign            |
| rs3733694 | NP_061993 | K | E | KE | possibly damaging |
| rs3733697 | NP_061761 | P | L | PL | possibly damaging |
| rs3733698 | NP_061761 | P | S | PS | benign            |
| rs3733699 | NP_061760 | R | S | RS | benign            |
| rs3733705 | NP_114062 | R | S | RS | benign            |
| rs3733705 | NP_061734 | R | S | RS | benign            |
| rs3733706 | NP_114062 | N | T | NT | probably damaging |
| rs3733706 | NP_061734 | N | T | NT | probably damaging |
| rs3733708 | NP_113685 | I | V | IV | benign            |
| rs3733708 | NP_061729 | I | V | IV | benign            |
| rs3733709 | NP_113685 | I | T | IT | benign            |
| rs3733709 | NP_061729 | I | T | IT | benign            |
| rs3733711 | NP_113599 | S | N | SN | benign            |
| rs3733711 | NP_113598 | S | N | SN | possibly damaging |
| rs3733711 | NP_061723 | S | N | SN | possibly damaging |
| rs3733712 | NP_113598 | N | H | NH | possibly damaging |
| rs3733712 | NP_113599 | N | H | NH | possibly damaging |
| rs3733712 | NP_061723 | N | H | NH | possibly damaging |
| rs3733722 | NP_057442 | E | K | EK | benign            |
| rs3733782 | NP_076996 | L | F | LF | benign            |
| rs3733789 | NP_003624 | V | M | VM | benign            |
| rs3733793 | NP_055701 | R | C | RC | benign            |
| rs3733801 | NP_001334 | S | N | SN | benign            |
| rs3733808 | NP_057264 | V | L | VL | benign            |
| rs3733875 | NP_758859 | V | L | VL | benign            |
| rs3733875 | NP_071900 | V | L | VL | benign            |
| rs3733876 | NP_057374 | P | L | PL | probably damaging |
| rs3733890 | NP_001704 | Q | R | QR | benign            |
| rs3733899 | XP_376420 | T | I | TI | possibly damaging |
| rs3733905 | NP_071745 | P | L | PL | probably damaging |
| rs3733920 | NP_005573 | S | R | SR | benign            |
| rs3733923 | NP_057305 | S | N | SN | benign            |
| rs3734016 | NP_057526 | E | K | EK | benign            |
| rs3734053 | NP_001438 | A | T | AT | benign            |
| rs3734054 | NP_001438 | R | K | RK | benign            |
| rs3734055 | NP_001438 | G | S | GS | benign            |
| rs3734056 | NP_001438 | R | Q | RQ | benign            |
| rs3734061 | NP_001438 | P | S | PS | possibly damaging |
| rs3734091 | NP_072044 | A | S | AS | benign            |
| rs3734091 | NP_003392 | A | S | AS | benign            |
| rs3734091 | NP_071801 | A | S | AS | benign            |
| rs3734094 | NP_004376 | V | L | VL | benign            |
| rs3734110 | NP_001360 | I | V | IV | benign            |
| rs3734114 | NP_113670 | S | P | SP | benign            |

|           |           |   |   |    |                   |
|-----------|-----------|---|---|----|-------------------|
| rs3734116 | NP_005724 | E | K | EK | benign            |
| rs3734166 | NP_001781 | C | R | CR | benign            |
| rs3734173 | NP_115553 | R | C | RC | probably damaging |
| rs3734265 | NP_060224 | K | E | KE | benign            |
| rs3734292 | NP_002281 | V | I | VI | benign            |
| rs3734303 | NP_055135 | R | Q | RQ | benign            |
| rs3734305 | XP_496826 | V | M | VM | benign            |
| rs3734311 | NP_001554 | H | D | HD | benign            |
| rs3734312 | NP_001554 | K | R | KR | benign            |
| rs3734313 | NP_001554 | R | H | RH | possibly damaging |
| rs3734334 | NP_065990 | N | S | NS | benign            |
| rs3734354 | NP_005059 | P | T | PT | possibly damaging |
| rs3734355 | NP_005059 | A | V | AV | benign            |
| rs3734401 | NP_006394 | T | M | TM | benign            |
| rs3734539 | NP_008980 | R | C | RC | benign            |
| rs3734539 | NP_510961 | R | C | RC | benign            |
| rs3734542 | NP_008980 | R | Q | RQ | benign            |
| rs3734543 | NP_008980 | G | A | GA | benign            |
| rs3734553 | NP_006281 | R | Q | RQ | benign            |
| rs3734559 | XP_166372 | D | N | DN | benign            |
| rs3734638 | NP_036391 | V | M | VM | benign            |
| rs3734707 | NP_835361 | L | V | LV | benign            |
| rs3734726 | NP_570970 | L | R | LR | benign            |
| rs3734726 | NP_079493 | R | L | RL | benign            |
| rs3734727 | NP_570970 | T | M | TM | benign            |
| rs3734795 | NP_005091 | E | D | ED | benign            |
| rs3734795 | NP_653080 | E | D | ED | benign            |
| rs3734797 | NP_005091 | V | I | VI | benign            |
| rs3734797 | NP_653080 | V | I | VI | benign            |
| rs3734799 | NP_005091 | K | Q | KQ | benign            |
| rs3734799 | NP_653080 | K | Q | KQ | benign            |
| rs3734800 | NP_060379 | M | T | MT | benign            |
| rs3734838 | NP_008959 | R | C | RC | possibly damaging |
| rs3734838 | NP_438111 | R | C | RC | possibly damaging |
| rs3734881 | NP_055968 | H | Y | HY | possibly damaging |
| rs3734928 | NP_055812 | S | L | SL | benign            |
| rs3734929 | NP_055812 | S | R | SR | benign            |
| rs3734990 | XP_039393 | R | C | RC | possibly damaging |
| rs3735042 | NP_064695 | M | T | MT | probably damaging |
| rs3735051 | NP_057436 | P | T | PT | probably damaging |
| rs3735053 | NP_057436 | R | L | RL | probably damaging |
| rs3735080 | NP_694968 | R | C | RC | probably damaging |
| rs3735099 | NP_061111 | P | H | PH | benign            |
| rs3735100 | NP_061111 | T | S | TS | benign            |
| rs3735101 | NP_061111 | R | L | RL | probably damaging |
| rs3735102 | NP_061111 | L | Q | LQ | benign            |

|           |           |   |   |    |                   |
|-----------|-----------|---|---|----|-------------------|
| rs3735133 | NP_115791 | S | L | SL | possibly damaging |
| rs3735134 | NP_115791 | T | M | TM | possibly damaging |
| rs3735135 | NP_112557 | T | A | TA | benign            |
| rs3735135 | NP_003709 | T | A | TA | benign            |
| rs3735137 | NP_112557 | L | F | LF | benign            |
| rs3735137 | NP_003709 | L | F | LF | benign            |
| rs3735156 | NP_733751 | P | R | PR | possibly damaging |
| rs3735165 | NP_037532 | L | P | LP | probably damaging |
| rs3735165 | NP_055189 | P | L | PL | probably damaging |
| rs3735169 | NP_076431 | N | S | NS | benign            |
| rs3735252 | NP_055731 | P | A | PA | possibly damaging |
| rs3735354 | NP_001052 | E | K | EK | benign            |
| rs3735354 | NP_112246 | E | K | EK | benign            |
| rs3735363 | NP_003487 | R | L | RL | possibly damaging |
| rs3735384 | NP_001628 | A | T | AT | benign            |
| rs3735386 | NP_001628 | A | G | AG | benign            |
| rs3735400 | NP_061155 | S | W | SW | probably damaging |
| rs3735422 | NP_006649 | V | L | VL | benign            |
| rs3735450 | NP_001176 | I | M | IM | benign            |
| rs3735454 | NP_115540 | T | M | TM | benign            |
| rs3735471 | NP_076959 | G | E | GE | probably damaging |
| rs3735478 | XP_371897 | L | F | LF | benign            |
| rs3735485 | XP_291223 | M | T | MT | benign            |
| rs3735493 | XP_166571 | C | F | CF | probably damaging |
| rs3735494 | XP_166571 | V | A | VA | benign            |
| rs3735495 | XP_166571 | D | E | DE | benign            |
| rs3735531 | NP_061824 | T | M | TM | possibly damaging |
| rs3735541 | NP_663160 | R | H | RH | benign            |
| rs3735541 | NP_663161 | R | H | RH | benign            |
| rs3735541 | NP_663162 | R | H | RH | benign            |
| rs3735541 | NP_663163 | R | H | RH | benign            |
| rs3735541 | NP_663164 | R | H | RH | benign            |
| rs3735541 | NP_056365 | R | H | RH | benign            |
| rs3735572 | XP_376587 | V | E | VE | possibly damaging |
| rs3735573 | XP_376587 | R | W | RW | probably damaging |
| rs3735615 | NP_877439 | T | R | TR | possibly damaging |
| rs3735653 | NP_001418 | L | F | LF | benign            |
| rs3735684 | NP_060251 | A | T | AT | benign            |
| rs3735726 | NP_758954 | R | Q | RQ | benign            |
| rs3735754 | NP_057324 | R | Q | RQ | benign            |
| rs3735754 | NP_878185 | R | Q | RQ | benign            |
| rs3735774 | NP_039253 | G | R | GR | benign            |
| rs3735854 | NP_055480 | G | D | GD | possibly damaging |
| rs3735971 | NP_061971 | P | S | PS | possibly damaging |
| rs3735972 | NP_061971 | E | G | EG | possibly damaging |
| rs3736001 | NP_005663 | E | K | EK | benign            |

|           |           |   |   |    |                   |
|-----------|-----------|---|---|----|-------------------|
| rs3736005 | NP_059997 | E | D | ED | benign            |
| rs3736019 | NP_002309 | D | N | DN | benign            |
| rs3736032 | NP_061049 | R | Q | RQ | benign            |
| rs3736101 | NP_569829 | R | Q | RQ | benign            |
| rs3736101 | NP_569832 | R | Q | RQ | benign            |
| rs3736101 | NP_003673 | R | Q | RQ | benign            |
| rs3736101 | NP_569831 | R | Q | RQ | benign            |
| rs3736101 | NP_569826 | R | Q | RQ | benign            |
| rs3736102 | NP_003673 | R | W | RW | benign            |
| rs3736102 | NP_569831 | R | W | RW | benign            |
| rs3736102 | NP_569829 | R | W | RW | possibly damaging |
| rs3736102 | NP_569832 | R | W | RW | possibly damaging |
| rs3736102 | NP_569826 | R | W | RW | possibly damaging |
| rs3736228 | NP_002326 | A | V | AV | benign            |
| rs3736238 | NP_004466 | A | T | AT | benign            |
| rs3736265 | NP_037393 | T | M | TM | benign            |
| rs3736281 | NP_003808 | I | T | IT | benign            |
| rs3736297 | NP_000636 | A | S | AS | benign            |
| rs3736297 | NP_000637 | A | S | AS | benign            |
| rs3736297 | NP_000635 | A | S | AS | benign            |
| rs3736310 | NP_997222 | I | T | IT | benign            |
| rs3736352 | NP_055279 | I | L | IL | benign            |
| rs3736373 | NP_060370 | V | A | VA | benign            |
| rs3736374 | NP_060370 | Q | H | QH | possibly damaging |
| rs3736390 | NP_055693 | T | S | TS | benign            |
| rs3736391 | NP_006842 | R | Q | RQ | benign            |
| rs3736392 | NP_006842 | R | Q | RQ | benign            |
| rs3736414 | XP_290592 | N | S | NS | possibly damaging |
| rs3736422 | NP_009045 | Q | R | QR | possibly damaging |
| rs3736423 | NP_061159 | M | V | MV | benign            |
| rs3736433 | NP_954590 | R | I | RI | possibly damaging |
| rs3736433 | NP_059993 | R | I | RI | possibly damaging |
| rs3736497 | NP_079391 | L | R | LR | benign            |
| rs3736508 | NP_057705 | H | R | HR | benign            |
| rs3736518 | NP_009196 | E | Q | EQ | benign            |
| rs3736563 | NP_055332 | N | S | NS | benign            |
| rs3736582 | NP_699167 | R | G | RG | benign            |
| rs3736689 | NP_061868 | S | G | SG | benign            |
| rs3736706 | NP_065073 | A | T | AT | benign            |
| rs3736763 | NP_055073 | L | V | LV | benign            |
| rs3736764 | NP_938141 | A | T | AT | benign            |
| rs3736764 | NP_938142 | A | T | AT | benign            |
| rs3736764 | NP_620057 | A | T | AT | benign            |
| rs3736764 | NP_620056 | A | T | AT | benign            |
| rs3736764 | NP_620055 | A | T | AT | benign            |
| rs3736764 | NP_060214 | A | T | AT | benign            |

|           |           |   |   |    |                   |
|-----------|-----------|---|---|----|-------------------|
| rs3736772 | XP_048128 | P | A | PA | benign            |
| rs3736781 | NP_001723 | T | A | TA | benign            |
| rs3736795 | NP_006775 | R | Q | RQ | benign            |
| rs3736822 | NP_055752 | I | V | IV | benign            |
| rs3736832 | NP_937998 | M | V | MV | possibly damaging |
| rs3736832 | NP_036576 | M | V | MV | possibly damaging |
| rs3736866 | NP_005757 | G | R | GR | possibly damaging |
| rs3736918 | XP_113763 | V | M | VM | benign            |
| rs3736946 | NP_057318 | M | V | MV | benign            |
| rs3736946 | NP_976314 | M | V | MV | benign            |
| rs3737002 | NP_000642 | T | M | TM | benign            |
| rs3737002 | NP_000564 | T | M | TM | benign            |
| rs3737035 | NP_950244 | N | S | NS | benign            |
| rs3737035 | NP_060440 | N | S | NS | benign            |
| rs3737075 | NP_478070 | V | L | VL | benign            |
| rs3737084 | NP_705903 | G | A | GA | benign            |
| rs3737113 | XP_371028 | M | V | MV | benign            |
| rs3737137 | NP_005551 | R | H | RH | benign            |
| rs3737184 | NP_060546 | A | S | AS | benign            |
| rs3737240 | NP_004416 | T | M | TM | benign            |
| rs3737240 | NP_073155 | T | M | TM | benign            |
| rs3737242 | NP_671698 | C | Y | CY | probably damaging |
| rs3737258 | NP_065779 | R | Q | RQ | benign            |
| rs3737274 | NP_059129 | D | N | DN | benign            |
| rs3737311 | NP_003631 | R | C | RC | probably damaging |
| rs3737374 | NP_055754 | T | A | TA | benign            |
| rs3737392 | NP_005561 | I | T | IT | possibly damaging |
| rs3737458 | NP_543142 | R | Q | RQ | benign            |
| rs3737506 | NP_060651 | E | D | ED | benign            |
| rs3737512 | NP_054896 | G | S | GS | benign            |
| rs3737553 | NP_000574 | H | Y | HY | probably damaging |
| rs3737564 | NP_057062 | I | T | IT | possibly damaging |
| rs3737655 | NP_060678 | Q | P | QP | possibly damaging |
| rs3737657 | NP_060678 | R | Q | RQ | benign            |
| rs3737703 | NP_056933 | G | S | GS | benign            |
| rs3737744 | NP_950245 | T | A | TA | benign            |
| rs3737786 | NP_112178 | F | L | FL | benign            |
| rs3737821 | NP_001843 | V | I | VI | benign            |
| rs3737925 | NP_002013 | T | S | TS | benign            |
| rs3737978 | NP_057136 | K | R | KR | benign            |
| rs3737994 | XP_036299 | S | P | SP | benign            |
| rs3738000 | NP_079076 | V | E | VE | benign            |
| rs3738005 | NP_071447 | S | I | SI | benign            |
| rs3738046 | NP_000111 | R | T | RT | benign            |
| rs3738053 | NP_004111 | S | G | SG | benign            |
| rs3738099 | NP_000469 | Y | H | YH | benign            |

|           |           |   |   |    |                   |
|-----------|-----------|---|---|----|-------------------|
| rs3738115 | NP_002817 | N | H | NH | possibly damaging |
| rs3738136 | NP_115785 | A | T | AT | benign            |
| rs3738159 | XP_052561 | L | V | LV | benign            |
| rs3738178 | NP_073583 | C | S | CS | probably damaging |
| rs3738247 | NP_065098 | D | E | DE | benign            |
| rs3738270 | NP_840059 | Y | H | YH | benign            |
| rs3738281 | NP_005549 | A | S | AS | benign            |
| rs3738283 | NP_004069 | K | I | KI | probably damaging |
| rs3738346 | NP_694944 | E | A | EA | possibly damaging |
| rs3738368 | NP_659427 | R | T | RT | benign            |
| rs3738372 | NP_001739 | K | Q | KQ | possibly damaging |
| rs3738401 | NP_061132 | Q | R | QR | benign            |
| rs3738413 | NP_079464 | R | Q | RQ | benign            |
| rs3738420 | NP_006775 | P | A | PA | possibly damaging |
| rs3738439 | XP_034086 | K | E | KE | benign            |
| rs3738477 | NP_067045 | G | S | GS | benign            |
| rs3738497 | NP_071751 | Q | K | QK | benign            |
| rs3738501 | NP_071751 | P | R | PR | probably damaging |
| rs3738531 | NP_002499 | Q | H | QH | benign            |
| rs3738534 | NP_002499 | Q | R | QR | benign            |
| rs3738586 | NP_115668 | L | F | LF | benign            |
| rs3738597 | XP_496351 | E | K | EK | benign            |
| rs3738648 | NP_006502 | N | S | NS | benign            |
| rs3738671 | NP_060116 | F | L | FL | benign            |
| rs3738690 | NP_003038 | I | V | IV | benign            |
| rs3738708 | NP_001609 | F | L | FL | benign            |
| rs3738766 | NP_005263 | L | I | LI | benign            |
| rs3738877 | NP_056994 | R | H | RH | possibly damaging |
| rs3738880 | NP_084656 | S | A | SA | benign            |
| rs3738880 | NP_084655 | S | A | SA | benign            |
| rs3738885 | NP_000456 | S | C | SC | benign            |
| rs3738888 | NP_000456 | R | C | RC | benign            |
| rs3738918 | NP_002201 | I | V | IV | benign            |
| rs3738922 | XP_371230 | R | H | RH | possibly damaging |
| rs3738952 | NP_003581 | V | I | VI | benign            |
| rs3739011 | NP_008994 | M | V | MV | benign            |
| rs3739038 | NP_004726 | H | D | HD | benign            |
| rs3739040 | NP_004726 | P | L | PL | possibly damaging |
| rs3739041 | NP_004726 | K | E | KE | benign            |
| rs3739061 | NP_061115 | R | Q | RQ | benign            |
| rs3739068 | NP_073728 | P | A | PA | possibly damaging |
| rs3739070 | NP_056465 | M | L | ML | benign            |
| rs3739090 | NP_068603 | V | M | VM | benign            |
| rs3739097 | NP_848648 | R | C | RC | possibly damaging |
| rs3739112 | NP_055383 | P | L | PL | probably damaging |
| rs3739124 | NP_055184 | M | V | MV | possibly damaging |

|           |           |   |   |    |                   |
|-----------|-----------|---|---|----|-------------------|
| rs3739168 | NP_009185 | P | S | PS | possibly damaging |
| rs3739173 | NP_009185 | A | V | AV | benign            |
| rs3739185 | NP_009185 | R | S | RS | benign            |
| rs3739186 | NP_009185 | Y | N | YN | probably damaging |
| rs3739206 | NP_009185 | V | G | VG | possibly damaging |
| rs3739308 | NP_065895 | I | T | IT | benign            |
| rs3739310 | NP_065895 | G | C | GC | probably damaging |
| rs3739335 | NP_055984 | K | R | KR | benign            |
| rs3739336 | NP_055984 | R | L | RL | probably damaging |
| rs3739406 | NP_004458 | I | V | IV | benign            |
| rs3739406 | NP_671736 | I | V | IV | benign            |
| rs3739406 | NP_963846 | I | V | IV | benign            |
| rs3739406 | NP_963847 | I | V | IV | benign            |
| rs3739407 | XP_372031 | C | R | CR | benign            |
| rs3739510 | NP_006050 | R | G | RG | benign            |
| rs3739512 | NP_006050 | H | Q | HQ | benign            |
| rs3739522 | XP_041018 | A | G | AG | benign            |
| rs3739523 | XP_041018 | S | I | SI | benign            |
| rs3739524 | XP_041018 | L | F | LF | benign            |
| rs3739583 | NP_068770 | T | S | TS | benign            |
| rs3739602 | XP_046861 | G | D | GD | possibly damaging |
| rs3739623 | NP_387504 | L | F | LF | benign            |
| rs3739630 | NP_002161 | E | K | EK | benign            |
| rs3739714 | NP_060107 | T | A | TA | benign            |
| rs3739716 | NP_060107 | G | D | GD | possibly damaging |
| rs3739721 | NP_000026 | E | Q | EQ | benign            |
| rs3739722 | NP_597702 | Q | R | QR | benign            |
| rs3739740 | NP_060846 | K | E | KE | benign            |
| rs3739741 | NP_060846 | A | G | AG | benign            |
| rs3739756 | NP_064592 | M | T | MT | possibly damaging |
| rs3739757 | NP_003820 | L | F | LF | benign            |
| rs3739922 | NP_055861 | F | C | FC | probably damaging |
| rs3739927 | NP_055861 | S | G | SG | benign            |
| rs3739965 | NP_777550 | I | L | IL | benign            |
| rs3739983 | NP_001369 | V | D | VD | probably damaging |
| rs3739998 | XP_166132 | S | T | ST | benign            |
| rs3740015 | NP_061176 | Y | D | YD | benign            |
| rs3740062 | NP_056036 | R | Q | RQ | benign            |
| rs3740071 | NP_000383 | E | Q | EQ | benign            |
| rs3740072 | NP_000383 | N | S | NS | possibly damaging |
| rs3740093 | NP_008894 | S | G | SG | benign            |
| rs3740128 | NP_004264 | I | M | IM | benign            |
| rs3740129 | NP_004264 | R | Q | RQ | benign            |
| rs3740168 | NP_001072 | P | R | PR | possibly damaging |
| rs3740199 | NP_067673 | R | G | RG | benign            |
| rs3740199 | NP_003465 | R | G | RG | possibly damaging |

|           |           |   |   |    |                   |
|-----------|-----------|---|---|----|-------------------|
| rs3740203 | XP_374768 | T | I | TI | possibly damaging |
| rs3740212 | XP_166140 | P | R | PR | probably damaging |
| rs3740217 | NP_002207 | P | A | PA | benign            |
| rs3740231 | NP_059129 | T | S | TS | benign            |
| rs3740296 | NP_002891 | R | K | RK | benign            |
| rs3740321 | NP_036462 | V | I | VI | benign            |
| rs3740343 | NP_009009 | V | I | VI | benign            |
| rs3740364 | NP_694958 | T | M | TM | benign            |
| rs3740370 | NP_060601 | H | Q | HQ | benign            |
| rs3740421 | NP_036347 | G | E | GE | possibly damaging |
| rs3740423 | NP_002408 | E | V | EV | possibly damaging |
| rs3740427 | XP_370585 | R | G | RG | possibly damaging |
| rs3740447 | XP_166125 | R | C | RC | possibly damaging |
| rs3740469 | NP_055535 | T | I | TI | possibly damaging |
| rs3740515 | NP_036215 | D | H | DH | benign            |
| rs3740515 | NP_852000 | H | D | HD | benign            |
| rs3740516 | NP_852000 | G | A | GA | benign            |
| rs3740517 | NP_852000 | A | V | AV | benign            |
| rs3740526 | NP_071757 | G | D | GD | benign            |
| rs3740630 | NP_060782 | D | V | DV | possibly damaging |
| rs3740691 | NP_115765 | S | N | SN | benign            |
| rs3740722 | NP_060513 | G | R | GR | benign            |
| rs3740753 | NP_000917 | T | S | TS | benign            |
| rs3740754 | NP_000917 | G | R | GR | benign            |
| rs3740771 | NP_056331 | V | I | VI | benign            |
| rs3740772 | NP_056331 | R | C | RC | probably damaging |
| rs3740853 | NP_060509 | R | Q | RQ | benign            |
| rs3740855 | XP_290546 | R | C | RC | possibly damaging |
| rs3740861 | XP_290546 | G | V | GV | probably damaging |
| rs3740862 | XP_290546 | V | M | VM | benign            |
| rs3740868 | NP_057624 | Q | P | QP | possibly damaging |
| rs3740870 | NP_004202 | K | N | KN | benign            |
| rs3740871 | NP_004202 | D | N | DN | benign            |
| rs3740881 | NP_001633 | D | N | DN | benign            |
| rs3740909 | NP_058648 | E | K | EK | benign            |
| rs3740912 | NP_058648 | I | V | IV | benign            |
| rs3740955 | NP_000439 | R | H | RH | benign            |
| rs3740978 | NP_003637 | P | L | PL | benign            |
| rs3740978 | NP_963291 | P | L | PL | possibly damaging |
| rs3740978 | NP_963290 | P | L | PL | possibly damaging |
| rs3740996 | NP_149023 | H | Y | HY | benign            |
| rs3740996 | NP_149083 | H | Y | HY | benign            |
| rs3740996 | NP_149084 | H | Y | HY | benign            |
| rs3740997 | NP_067629 | D | H | DH | possibly damaging |
| rs3740997 | NP_569073 | D | H | DH | probably damaging |
| rs3741005 | NP_068599 | Y | C | YC | probably damaging |



|           |           |   |   |    |                   |
|-----------|-----------|---|---|----|-------------------|
| rs3741023 | XP_039515 | S | P | SP | benign            |
| rs3741040 | NP_000471 | R | C | RC | probably damaging |
| rs3741046 | NP_055880 | R | L | RL | possibly damaging |
| rs3741048 | NP_055880 | D | N | DN | benign            |
| rs3741056 | NP_000010 | A | P | AP | benign            |
| rs3741095 | NP_612351 | A | E | AE | benign            |
| rs3741138 | NP_079431 | A | G | AG | benign            |
| rs3741150 | NP_055601 | G | E | GE | possibly damaging |
| rs3741151 | NP_055601 | R | L | RL | possibly damaging |
| rs3741156 | NP_002555 | R | S | RS | possibly damaging |
| rs3741156 | NP_788085 | R | S | RS | possibly damaging |
| rs3741156 | NP_788086 | R | S | RS | possibly damaging |
| rs3741178 | NP_000686 | A | T | AT | benign            |
| rs3741194 | NP_076941 | V | A | VA | benign            |
| rs3741238 | NP_612634 | G | D | GD | possibly damaging |
| rs3741252 | NP_006124 | P | L | PL | possibly damaging |
| rs3741256 | NP_068373 | D | E | DE | benign            |
| rs3741280 | NP_065744 | H | N | HN | possibly damaging |
| rs3741310 | NP_001549 | D | G | DG | possibly damaging |
| rs3741367 | NP_065137 | H | R | HR | benign            |
| rs3741378 | NP_006738 | S | F | SF | benign            |
| rs3741378 | NP_694985 | S | F | SF | benign            |
| rs3741379 | NP_006738 | A | S | AS | benign            |
| rs3741379 | NP_694985 | A | S | AS | benign            |
| rs3741380 | XP_170658 | R | Q | RQ | benign            |
| rs3741395 | XP_290516 | Q | R | QR | benign            |
| rs3741426 | NP_006567 | I | T | IT | possibly damaging |
| rs3741447 | NP_937883 | R | W | RW | benign            |
| rs3741447 | NP_002947 | R | W | RW | benign            |
| rs3741457 | NP_003985 | T | A | TA | benign            |
| rs3741457 | NP_000890 | T | A | TA | benign            |
| rs3741466 | NP_036306 | T | M | TM | benign            |
| rs3741466 | NP_699179 | T | M | TM | benign            |
| rs3741486 | NP_005886 | P | L | PL | benign            |
| rs3741554 | XP_035497 | L | M | LM | benign            |
| rs3741576 | XP_374985 | P | A | PA | possibly damaging |
| rs3741624 | NP_003473 | T | N | TN | benign            |
| rs3741626 | NP_003473 | P | S | PS | possibly damaging |
| rs3741628 | NP_060292 | T | P | TP | benign            |
| rs3741659 | NP_065949 | R | K | RK | benign            |
| rs3741665 | NP_612482 | T | A | TA | benign            |
| rs3741676 | NP_003868 | S | N | SN | benign            |
| rs3741694 | NP_542449 | L | P | LP | possibly damaging |
| rs3741795 | NP_477517 | S | C | SC | benign            |
| rs3741798 | NP_060520 | V | I | VI | benign            |
| rs3741803 | NP_060520 | N | Y | NY | possibly damaging |

|           |           |   |   |    |                   |
|-----------|-----------|---|---|----|-------------------|
| rs3741822 | NP_061124 | A | D | AD | benign            |
| rs3741845 | NP_076406 | V | A | VA | benign            |
| rs3741883 | XP_374996 | P | R | PR | probably damaging |
| rs3741901 | NP_065106 | P | S | PS | probably damaging |
| rs3741903 | NP_065106 | V | A | VA | benign            |
| rs3741913 | NP_001029 | C | F | CF | probably damaging |
| rs3741923 | NP_115878 | T | A | TA | benign            |
| rs3741927 | NP_003836 | N | S | NS | benign            |
| rs3741981 | NP_058132 | S | G | SG | benign            |
| rs3741981 | NP_002525 | S | G | SG | benign            |
| rs3742030 | NP_067638 | P | S | PS | possibly damaging |
| rs3742049 | XP_495935 | A | T | AT | benign            |
| rs3742076 | NP_973732 | S | P | SP | benign            |
| rs3742076 | NP_973731 | S | P | SP | benign            |
| rs3742076 | NP_068772 | S | P | SP | possibly damaging |
| rs3742089 | NP_057630 | V | I | VI | benign            |
| rs3742113 | NP_689918 | D | G | DG | possibly damaging |
| rs3742185 | NP_060134 | P | L | PL | probably damaging |
| rs3742191 | NP_060680 | K | E | KE | benign            |
| rs3742192 | NP_060680 | V | I | VI | benign            |
| rs3742212 | NP_996820 | L | F | LF | benign            |
| rs3742262 | XP_038664 | M | T | MT | benign            |
| rs3742264 | NP_057497 | A | T | AT | benign            |
| rs3742264 | NP_001863 | T | A | TA | benign            |
| rs3742289 | XP_375024 | G | V | GV | benign            |
| rs3742290 | XP_375024 | T | A | TA | benign            |
| rs3742298 | NP_008946 | F | L | FL | probably damaging |
| rs3742299 | NP_002581 | S | L | SL | possibly damaging |
| rs3742301 | NP_116567 | W | R | WR | probably damaging |
| rs3742301 | NP_002581 | W | R | WR | probably damaging |
| rs3742302 | NP_005791 | N | S | NS | benign            |
| rs3742303 | NP_005791 | P | S | PS | possibly damaging |
| rs3742321 | NP_821074 | K | R | KR | benign            |
| rs3742321 | NP_821075 | K | R | KR | benign            |
| rs3742321 | NP_443083 | K | R | KR | benign            |
| rs3742424 | NP_848701 | A | P | AP | benign            |
| rs3742424 | NP_002710 | A | P | AP | benign            |
| rs3742453 | XP_497423 | V | L | VL | benign            |
| rs3742454 | XP_497423 | P | S | PS | benign            |
| rs3742456 | XP_497423 | E | G | EG | possibly damaging |
| rs3742457 | XP_497423 | S | N | SN | benign            |
| rs3742489 | XP_375065 | P | T | PT | possibly damaging |
| rs3742518 | XP_370756 | E | K | EK | benign            |
| rs3742520 | XP_377338 | K | T | KT | benign            |
| rs3742536 | NP_031387 | P | S | PS | probably damaging |
| rs3742569 | NP_060413 | L | P | LP | benign            |

|           |           |   |   |    |                   |
|-----------|-----------|---|---|----|-------------------|
| rs3742591 | NP_055906 | L | V | LV | benign            |
| rs3742592 | XP_375075 | N | I | NI | possibly damaging |
| rs3742636 | NP_059116 | P | H | PH | probably damaging |
| rs3742646 | NP_072093 | A | V | AV | benign            |
| rs3742704 | NP_003599 | I | L | IL | benign            |
| rs3742712 | NP_001266 | R | Q | RQ | benign            |
| rs3742717 | NP_079108 | T | M | TM | benign            |
| rs3742728 | NP_954874 | A | T | AT | benign            |
| rs3742728 | NP_954993 | A | T | AT | benign            |
| rs3742728 | NP_872315 | A | T | AT | benign            |
| rs3742801 | NP_064730 | E | K | EK | benign            |
| rs3742801 | NP_064731 | E | K | EK | benign            |
| rs3742801 | NP_064720 | E | K | EK | benign            |
| rs3742809 | NP_079333 | K | E | KE | benign            |
| rs3742819 | NP_689544 | R | C | RC | possibly damaging |
| rs3742883 | NP_056161 | N | S | NS | benign            |
| rs3742884 | NP_056161 | A | V | AV | benign            |
| rs3742885 | NP_056161 | P | L | PL | benign            |
| rs3742926 | NP_004265 | A | V | AV | benign            |
| rs3742935 | XP_290629 | P | A | PA | possibly damaging |
| rs3742937 | XP_208766 | T | N | TN | benign            |
| rs3742945 | NP_612385 | R | Q | RQ | benign            |
| rs3742946 | XP_050278 | G | S | GS | benign            |
| rs3742970 | NP_055608 | R | S | RS | possibly damaging |
| rs3742985 | NP_079184 | S | G | SG | benign            |
| rs3742993 | XP_031744 | N | D | ND | benign            |
| rs3742995 | XP_031744 | R | G | RG | benign            |
| rs3743044 | NP_005145 | D | G | DG | probably damaging |
| rs3743070 | NP_055894 | E | K | EK | benign            |
| rs3743071 | NP_055894 | Q | E | QE | benign            |
| rs3743091 | NP_663633 | L | F | LF | benign            |
| rs3743093 | NP_663633 | G | E | GE | possibly damaging |
| rs3743126 | NP_009154 | V | F | VF | benign            |
| rs3743135 | NP_064553 | H | R | HR | benign            |
| rs3743137 | NP_064553 | P | L | PL | probably damaging |
| rs3743142 | NP_277045 | R | W | RW | probably damaging |
| rs3743143 | NP_055767 | E | G | EG | possibly damaging |
| rs3743193 | NP_055733 | P | S | PS | probably damaging |
| rs3743211 | NP_056307 | D | G | DG | possibly damaging |
| rs3743279 | NP_705872 | N | S | NS | benign            |
| rs3743279 | NP_079242 | N | S | NS | benign            |
| rs3743279 | NP_705871 | N | S | NS | benign            |
| rs3743279 | NP_705870 | N | S | NS | benign            |
| rs3743279 | NP_705869 | N | S | NS | benign            |
| rs3743315 | NP_060473 | I | T | IT | benign            |
| rs3743323 | NP_009131 | S | N | SN | benign            |

|           |           |   |   |    |                   |
|-----------|-----------|---|---|----|-------------------|
| rs3743323 | NP_658913 | S | N | SN | benign            |
| rs3743323 | NP_006729 | S | N | SN | benign            |
| rs3743372 | NP_689472 | C | R | CR | possibly damaging |
| rs3743373 | NP_002657 | E | K | EK | benign            |
| rs3743477 | NP_073604 | P | L | PL | probably damaging |
| rs3743523 | NP_149978 | E | D | ED | benign            |
| rs3743563 | NP_002419 | G | R | GR | benign            |
| rs3743598 | NP_036223 | N | H | NH | benign            |
| rs3743599 | NP_036223 | T | N | TN | benign            |
| rs3743600 | NP_036223 | T | P | TP | benign            |
| rs3743640 | NP_647610 | P | S | PS | benign            |
| rs3743640 | NP_005670 | P | S | PS | benign            |
| rs3743695 | NP_060009 | E | K | EK | benign            |
| rs3743728 | NP_036295 | R | Q | RQ | benign            |
| rs3743736 | NP_775186 | E | A | EA | possibly damaging |
| rs3743736 | NP_775187 | E | A | EA | possibly damaging |
| rs3743736 | NP_004546 | E | A | EA | possibly damaging |
| rs3743736 | NP_775188 | E | A | EA | possibly damaging |
| rs3743738 | NP_079215 | A | V | AV | benign            |
| rs3743749 | NP_955387 | S | T | ST | benign            |
| rs3743771 | NP_079410 | T | A | TA | benign            |
| rs3743788 | NP_001034 | I | T | IT | benign            |
| rs3743808 | NP_000294 | M | V | MV | probably damaging |
| rs3743853 | NP_112485 | D | N | DN | benign            |
| rs3743868 | NP_065815 | R | Q | RQ | benign            |
| rs3743887 | NP_067082 | R | W | RW | benign            |
| rs3743913 | NP_620124 | R | Q | RQ | benign            |
| rs3743922 | XP_208908 | N | K | NK | benign            |
| rs3743922 | NP_060460 | N | K | NK | possibly damaging |
| rs3743968 | NP_061173 | K | I | KI | possibly damaging |
| rs3743968 | NP_008841 | K | I | KI | possibly damaging |
| rs3743979 | NP_777577 | V | M | VM | benign            |
| rs3743989 | NP_113678 | R | C | RC | probably damaging |
| rs3744013 | XP_371079 | T | I | TI | benign            |
| rs3744018 | NP_258411 | A | T | AT | benign            |
| rs3744022 | NP_258411 | S | L | SL | benign            |
| rs3744025 | NP_954712 | T | M | TM | benign            |
| rs3744032 | NP_009223 | G | S | GS | benign            |
| rs3744039 | NP_892010 | Q | H | QH | benign            |
| rs3744039 | NP_068807 | Q | H | QH | benign            |
| rs3744093 | NP_060233 | V | I | VI | benign            |
| rs3744099 | NP_004749 | H | L | HL | benign            |
| rs3744101 | NP_004749 | R | C | RC | possibly damaging |
| rs3744108 | NP_004678 | L | V | LV | benign            |
| rs3744206 | NP_001536 | R | P | RP | possibly damaging |
| rs3744241 | NP_775102 | E | K | EK | benign            |

|           |           |   |   |    |                   |
|-----------|-----------|---|---|----|-------------------|
| rs3744250 | NP_115732 | L | F | LF | benign            |
| rs3744307 | NP_004685 | E | D | ED | benign            |
| rs3744355 | NP_443089 | T | S | TS | benign            |
| rs3744356 | NP_002302 | R | W | RW | probably damaging |
| rs3744356 | NP_039269 | R | W | RW | probably damaging |
| rs3744370 | NP_689483 | N | K | NK | benign            |
| rs3744372 | XP_496206 | Y | S | YS | probably damaging |
| rs3744374 | NP_644814 | A | V | AV | benign            |
| rs3744376 | NP_071353 | A | V | AV | benign            |
| rs3744395 | NP_444515 | R | C | RC | benign            |
| rs3744399 | NP_056158 | T | A | TA | benign            |
| rs3744438 | NP_060958 | A | V | AV | benign            |
| rs3744448 | NP_060958 | G | A | GA | benign            |
| rs3744476 | NP_006679 | K | R | KR | benign            |
| rs3744508 | NP_002977 | A | T | AT | benign            |
| rs3744523 | NP_079425 | V | M | VM | benign            |
| rs3744539 | NP_005211 | D | H | DH | benign            |
| rs3744549 | NP_065093 | V | I | VI | benign            |
| rs3744550 | NP_003793 | R | H | RH | benign            |
| rs3744554 | NP_060003 | E | K | EK | benign            |
| rs3744558 | NP_060003 | T | M | TM | benign            |
| rs3744564 | NP_005954 | R | C | RC | probably damaging |
| rs3744574 | NP_001363 | P | L | PL | probably damaging |
| rs3744577 | NP_001363 | A | T | AT | benign            |
| rs3744581 | NP_001363 | N | S | NS | possibly damaging |
| rs3744644 | NP_003684 | E | D | ED | benign            |
| rs3744644 | NP_663327 | E | D | ED | benign            |
| rs3744647 | NP_776089 | S | P | SP | possibly damaging |
| rs3744679 | NP_002199 | Q | H | QH | possibly damaging |
| rs3744692 | NP_000682 | G | E | GE | benign            |
| rs3744696 | NP_000682 | P | A | PA | probably damaging |
| rs3744710 | NP_004694 | S | T | ST | benign            |
| rs3744718 | NP_127499 | R | Q | RQ | benign            |
| rs3744718 | NP_127500 | R | Q | RQ | benign            |
| rs3744718 | NP_055737 | R | Q | RQ | benign            |
| rs3744718 | NP_127497 | R | Q | RQ | benign            |
| rs3744741 | NP_056536 | R | Q | RQ | benign            |
| rs3744786 | NP_002269 | Q | R | QR | benign            |
| rs3744807 | NP_722546 | G | R | GR | possibly damaging |
| rs3744822 | NP_056023 | S | P | SP | possibly damaging |
| rs3744825 | NP_056374 | I | V | IV | benign            |
| rs3744872 | NP_079081 | N | H | NH | benign            |
| rs3744873 | NP_079081 | Q | K | QK | benign            |
| rs3744900 | NP_060417 | S | N | SN | benign            |
| rs3744921 | NP_073588 | K | R | KR | benign            |
| rs3744979 | NP_056025 | G | D | GD | possibly damaging |

|           |           |   |   |    |                   |
|-----------|-----------|---|---|----|-------------------|
| rs3745009 | NP_009094 | A | T | AT | benign            |
| rs3745060 | NP_056963 | K | T | KT | benign            |
| rs3745073 | NP_004843 | S | L | SL | benign            |
| rs3745078 | NP_005594 | I | V | IV | benign            |
| rs3745079 | NP_005594 | H | Q | HQ | possibly damaging |
| rs3745102 | NP_060730 | H | R | HR | benign            |
| rs3745105 | XP_375639 | R | K | RK | benign            |
| rs3745115 | XP_047550 | K | N | KN | benign            |
| rs3745132 | NP_689688 | K | Q | KQ | benign            |
| rs3745132 | NP_116217 | Q | K | QK | benign            |
| rs3745133 | NP_689688 | L | R | LR | probably damaging |
| rs3745133 | NP_116217 | L | R | LR | probably damaging |
| rs3745145 | NP_006496 | R | G | RG | probably damaging |
| rs3745186 | NP_078803 | G | R | GR | possibly damaging |
| rs3745193 | NP_598399 | R | H | RH | possibly damaging |
| rs3745193 | NP_116009 | R | H | RH | possibly damaging |
| rs3745202 | NP_870998 | P | R | PR | probably damaging |
| rs3745207 | NP_000704 | R | Q | RQ | probably damaging |
| rs3745226 | NP_073589 | R | Q | RQ | benign            |
| rs3745227 | NP_073589 | P | L | PL | probably damaging |
| rs3745228 | NP_073589 | R | Q | RQ | benign            |
| rs3745234 | NP_001401 | V | I | VI | benign            |
| rs3745238 | NP_005348 | R | L | RL | benign            |
| rs3745249 | NP_835388 | K | E | KE | benign            |
| rs3745249 | NP_075384 | K | E | KE | benign            |
| rs3745268 | NP_004221 | R | Q | RQ | benign            |
| rs3745274 | NP_000758 | Q | H | QH | benign            |
| rs3745297 | NP_002143 | S | A | SA | benign            |
| rs3745298 | NP_002143 | S | N | SN | benign            |
| rs3745312 | NP_699160 | E | K | EK | benign            |
| rs3745318 | NP_057354 | L | P | LP | possibly damaging |
| rs3745319 | NP_057354 | R | H | RH | benign            |
| rs3745320 | XP_211460 | I | V | IV | benign            |
| rs3745335 | NP_056507 | D | E | DE | benign            |
| rs3745340 | NP_056507 | Q | R | QR | benign            |
| rs3745358 | XP_048362 | P | S | PS | possibly damaging |
| rs3745377 | NP_079337 | P | L | PL | probably damaging |
| rs3745379 | NP_079337 | E | K | EK | benign            |
| rs3745418 | NP_006855 | V | M | VM | benign            |
| rs3745433 | NP_065710 | G | R | GR | benign            |
| rs3745442 | NP_068352 | E | D | ED | benign            |
| rs3745442 | NP_068354 | E | D | ED | benign            |
| rs3745467 | NP_079101 | R | W | RW | possibly damaging |
| rs3745470 | NP_067051 | T | A | TA | benign            |
| rs3745486 | NP_078958 | P | L | PL | possibly damaging |
| rs3745489 | NP_036478 | G | S | GS | possibly damaging |

|           |           |   |   |    |                   |
|-----------|-----------|---|---|----|-------------------|
| rs3745489 | NP_057637 | G | S | GS | possibly damaging |
| rs3745489 | NP_714940 | G | S | GS | possibly damaging |
| rs3745489 | NP_714941 | G | S | GS | possibly damaging |
| rs3745498 | NP_689571 | R | C | RC | possibly damaging |
| rs3745521 | NP_057232 | V | A | VA | benign            |
| rs3745535 | NP_002767 | S | A | SA | benign            |
| rs3745535 | NP_665895 | S | A | SA | benign            |
| rs3745539 | NP_659196 | G | E | GE | possibly damaging |
| rs3745539 | NP_006844 | G | E | GE | probably damaging |
| rs3745576 | XP_091914 | Q | H | QH | benign            |
| rs3745635 | NP_000140 | G | S | GS | possibly damaging |
| rs3745640 | NP_699190 | P | L | PL | benign            |
| rs3745663 | XP_375568 | R | H | RH | benign            |
| rs3745674 | NP_004936 | P | L | PL | probably damaging |
| rs3745708 | NP_061986 | P | L | PL | possibly damaging |
| rs3745711 | NP_061986 | A | D | AD | benign            |
| rs3745712 | NP_061986 | A | T | AT | benign            |
| rs3745725 | NP_733838 | R | C | RC | probably damaging |
| rs3745727 | NP_060178 | R | H | RH | benign            |
| rs3745728 | NP_060178 | L | P | LP | probably damaging |
| rs3745732 | NP_064511 | S | F | SF | possibly damaging |
| rs3745746 | NP_062829 | V | A | VA | benign            |
| rs3745747 | NP_062829 | R | Q | RQ | benign            |
| rs3745751 | NP_071425 | C | W | CW | probably damaging |
| rs3745764 | NP_861451 | T | I | TI | possibly damaging |
| rs3745765 | NP_861451 | S | I | SI | benign            |
| rs3745775 | NP_996777 | R | Q | RQ | benign            |
| rs3745783 | NP_065907 | F | L | FL | benign            |
| rs3745790 | XP_371184 | V | I | VI | benign            |
| rs3745833 | NP_149097 | I | M | IM | benign            |
| rs3745842 | NP_150651 | Q | R | QR | benign            |
| rs3745842 | NP_061985 | Q | R | QR | benign            |
| rs3745885 | NP_065396 | T | M | TM | possibly damaging |
| rs3745893 | NP_006728 | R | Q | RQ | benign            |
| rs3745894 | NP_006728 | P | T | PT | benign            |
| rs3745902 | NP_006728 | T | M | TM | benign            |
| rs3745903 | NP_006728 | K | Q | KQ | benign            |
| rs3745904 | NP_060322 | E | Q | EQ | benign            |
| rs3745945 | XP_032278 | P | A | PA | possibly damaging |
| rs3745953 | NP_067008 | S | R | SR | benign            |
| rs3745972 | NP_004355 | A | E | AE | benign            |
| rs3745974 | NP_002324 | A | V | AV | benign            |
| rs3745985 | NP_056982 | A | T | AT | benign            |
| rs3745997 | NP_065139 | T | N | TN | benign            |
| rs3746072 | NP_003766 | R | L | RL | benign            |
| rs3746101 | NP_951009 | Q | K | QK | benign            |

|           |           |   |   |    |                   |
|-----------|-----------|---|---|----|-------------------|
| rs3746101 | NP_060042 | Q | K | QK | benign            |
| rs3746119 | NP_004877 | K | T | KT | benign            |
| rs3746139 | NP_079164 | A | T | AT | benign            |
| rs3746173 | NP_775752 | S | G | SG | benign            |
| rs3746175 | NP_775752 | K | R | KR | benign            |
| rs3746204 | NP_079070 | R | C | RC | benign            |
| rs3746223 | NP_065684 | I | M | IM | benign            |
| rs3746231 | XP_372753 | G | D | GD | benign            |
| rs3746266 | NP_056136 | A | T | AT | benign            |
| rs3746266 | NP_079297 | T | A | TA | benign            |
| rs3746267 | NP_056136 | R | H | RH | benign            |
| rs3746267 | NP_079297 | R | H | RH | benign            |
| rs3746319 | NP_037530 | K | E | KE | benign            |
| rs3746323 | NP_037530 | H | D | HD | probably damaging |
| rs3746366 | NP_742105 | Y | C | YC | benign            |
| rs3746366 | NP_004509 | Y | C | YC | probably damaging |
| rs3746366 | NP_742104 | Y | C | YC | probably damaging |
| rs3746366 | NP_742106 | Y | C | YC | probably damaging |
| rs3746387 | NP_542406 | E | K | EK | benign            |
| rs3746405 | XP_086650 | C | R | CR | probably damaging |
| rs3746414 | NP_060667 | S | N | SN | benign            |
| rs3746414 | NP_071371 | S | N | SN | benign            |
| rs3746414 | NP_955458 | S | N | SN | benign            |
| rs3746429 | NP_060687 | T | A | TA | benign            |
| rs3746435 | XP_371398 | K | N | KN | possibly damaging |
| rs3746437 | XP_371398 | R | H | RH | probably damaging |
| rs3746442 | XP_371398 | P | S | PS | benign            |
| rs3746471 | XP_028810 | R | W | RW | probably damaging |
| rs3746500 | NP_542170 | R | Q | RQ | benign            |
| rs3746542 | NP_115597 | I | V | IV | benign            |
| rs3746609 | NP_056153 | G | S | GS | benign            |
| rs3746636 | NP_075556 | S | Y | SY | possibly damaging |
| rs3746638 | NP_075556 | A | V | AV | benign            |
| rs3746699 | NP_068598 | I | V | IV | benign            |
| rs3746700 | NP_068598 | R | C | RC | possibly damaging |
| rs3746726 | NP_001043 | V | F | VF | possibly damaging |
| rs3746731 | NP_036204 | S | P | SP | benign            |
| rs3746736 | NP_612140 | W | R | WR | benign            |
| rs3746737 | NP_612140 | T | M | TM | benign            |
| rs3746802 | NP_212134 | V | I | VI | benign            |
| rs3746803 | NP_212134 | M | T | MT | benign            |
| rs3746804 | NP_212134 | L | P | LP | benign            |
| rs3746840 | NP_008969 | R | S | RS | benign            |
| rs3746843 | NP_064537 | I | V | IV | benign            |
| rs3746866 | NP_005119 | P | H | PH | probably damaging |
| rs3746867 | NP_005119 | R | S | RS | benign            |



|           |           |   |   |    |                   |
|-----------|-----------|---|---|----|-------------------|
| rs3746875 | NP_733933 | M | L | ML | benign            |
| rs3746887 | NP_149363 | M | T | MT | benign            |
| rs3746891 | NP_065690 | M | V | MV | benign            |
| rs3746951 | NP_775490 | G | S | GS | benign            |
| rs3747038 | XP_036729 | V | I | VI | benign            |
| rs3747038 | NP_059110 | V | I | VI | benign            |
| rs3747052 | NP_443732 | K | R | KR | benign            |
| rs3747073 | NP_075380 | D | N | DN | benign            |
| rs3747103 | NP_057533 | G | E | GE | possibly damaging |
| rs3747105 | NP_057533 | S | N | SN | benign            |
| rs3747186 | NP_000253 | I | V | IV | benign            |
| rs3747203 | NP_942153 | R | G | RG | possibly damaging |
| rs3747203 | NP_073622 | R | G | RG | probably damaging |
| rs3747286 | NP_065973 | E | K | EK | benign            |
| rs3747295 | NP_938011 | F | L | FL | benign            |
| rs3747327 | NP_002177 | V | I | VI | benign            |
| rs3747328 | NP_002177 | S | T | ST | benign            |
| rs3747328 | NP_789743 | V | L | VL | benign            |
| rs3747333 | NP_851849 | L | F | LF | possibly damaging |
| rs3747354 | NP_079460 | E | Q | EQ | benign            |
| rs3747359 | NP_055614 | D | H | DH | possibly damaging |
| rs3747359 | NP_620074 | D | H | DH | possibly damaging |
| rs3747386 | NP_036212 | P | A | PA | probably damaging |
| rs3747421 | NP_060326 | E | V | EV | possibly damaging |
| rs3747423 | NP_068838 | D | N | DN | benign            |
| rs3747479 | NP_057724 | S | C | SC | benign            |
| rs3747481 | NP_076936 | P | L | PL | probably damaging |
| rs3747495 | XP_372133 | F | L | FL | benign            |
| rs3747517 | NP_071451 | H | R | HR | possibly damaging |
| rs3747525 | NP_060110 | E | A | EA | possibly damaging |
| rs3747531 | NP_002436 | P | A | PA | probably damaging |
| rs3747531 | NP_619730 | P | A | PA | probably damaging |
| rs3747531 | NP_619729 | P | A | PA | probably damaging |
| rs3747532 | NP_005445 | A | G | AG | possibly damaging |
| rs3747539 | NP_055722 | T | P | TP | benign            |
| rs3747540 | NP_055722 | S | L | SL | benign            |
| rs3747579 | NP_078811 | R | Q | RQ | benign            |
| rs3747582 | NP_065728 | P | L | PL | probably damaging |
| rs3747616 | NP_065840 | A | V | AV | benign            |
| rs3747617 | NP_065840 | E | G | EG | possibly damaging |
| rs3747631 | NP_006329 | L | V | LV | benign            |
| rs3747631 | NP_963924 | L | V | LV | benign            |
| rs3747690 | NP_079363 | T | P | TP | possibly damaging |
| rs3747731 | XP_029101 | P | L | PL | probably damaging |
| rs3747742 | NP_079083 | G | S | GS | benign            |
| rs3747747 | NP_006644 | P | L | PL | possibly damaging |

|           |           |   |   |    |                   |
|-----------|-----------|---|---|----|-------------------|
| rs3747787 | XP_166300 | C | R | CR | probably damaging |
| rs3747849 | NP_937895 | A | T | AT | probably damaging |
| rs3747853 | NP_067049 | R | C | RC | possibly damaging |
| rs3747879 | NP_690875 | R | Q | RQ | benign            |
| rs3747879 | NP_997011 | R | Q | RQ | benign            |
| rs3747881 | NP_963858 | K | R | KR | benign            |
| rs3747881 | NP_570140 | K | R | KR | benign            |
| rs3747933 | XP_097736 | P | R | PR | probably damaging |
| rs3747943 | NP_065194 | D | N | DN | benign            |
| rs3747951 | NP_057629 | P | S | PS | possibly damaging |
| rs3747952 | NP_057629 | P | S | PS | benign            |
| rs3747954 | NP_057629 | V | I | VI | benign            |
| rs3747955 | NP_057629 | R | H | RH | benign            |
| rs3747959 | XP_046531 | H | Y | HY | benign            |
| rs3747991 | NP_055917 | P | R | PR | probably damaging |
| rs3748022 | XP_375834 | P | L | PL | benign            |
| rs3748034 | NP_001519 | A | S | AS | benign            |
| rs3748042 | NP_060899 | N | S | NS | benign            |
| rs3748043 | NP_060899 | E | D | ED | benign            |
| rs3748085 | XP_376519 | I | V | IV | benign            |
| rs3748092 | NP_443085 | V | M | VM | benign            |
| rs3748098 | XP_376724 | G | A | GA | benign            |
| rs3748103 | XP_496891 | D | Y | DY | benign            |
| rs3748103 | NP_060734 | Y | D | YD | benign            |
| rs3748140 | NP_078883 | G | E | GE | benign            |
| rs3748169 | NP_002151 | D | H | DH | possibly damaging |
| rs3748170 | NP_002151 | L | V | LV | benign            |
| rs3748176 | NP_110394 | P | L | PL | benign            |
| rs3748178 | NP_110394 | R | Q | RQ | benign            |
| rs3748192 | NP_055626 | V | A | VA | benign            |
| rs3748195 | NP_055626 | R | H | RH | benign            |
| rs3748197 | NP_055626 | P | A | PA | possibly damaging |
| rs3748199 | NP_057118 | H | R | HR | possibly damaging |
| rs3748210 | NP_002562 | Q | K | QK | benign            |
| rs3748222 | NP_065875 | S | N | SN | benign            |
| rs3748229 | NP_689522 | A | S | AS | benign            |
| rs3748233 | NP_689522 | E | K | EK | benign            |
| rs3748261 | NP_079001 | K | R | KR | benign            |
| rs3748287 | XP_045423 | S | G | SG | possibly damaging |
| rs3748338 | NP_919412 | T | S | TS | benign            |
| rs3748360 | NP_065099 | S | L | SL | possibly damaging |
| rs3748361 | NP_065099 | Q | E | QE | benign            |
| rs3748400 | NP_055959 | V | M | VM | benign            |
| rs3748415 | NP_694545 | V | I | VI | benign            |
| rs3748428 | NP_071351 | V | I | VI | benign            |
| rs3748433 | NP_009117 | R | Q | RQ | benign            |

|           |           |   |   |    |                   |
|-----------|-----------|---|---|----|-------------------|
| rs3748460 | XP_293104 | G | R | GR | possibly damaging |
| rs3748545 | NP_065883 | G | E | GE | possibly damaging |
| rs3748547 | NP_065883 | R | H | RH | benign            |
| rs3748570 | NP_006608 | P | L | PL | possibly damaging |
| rs3748597 | NP_056473 | V | I | VI | benign            |
| rs3748665 | NP_079022 | R | Q | RQ | benign            |
| rs3748666 | NP_079022 | H | D | HD | benign            |
| rs3748686 | NP_060236 | R | W | RW | possibly damaging |
| rs3748704 | NP_079187 | D | G | DG | possibly damaging |
| rs3748729 | NP_005540 | S | N | SN | benign            |
| rs3748735 | NP_079455 | A | T | AT | benign            |
| rs3748796 | NP_569707 | Y | C | YC | probably damaging |
| rs3748796 | NP_002831 | Y | C | YC | probably damaging |
| rs3748800 | NP_569707 | D | N | DN | benign            |
| rs3748800 | NP_002831 | D | N | DN | benign            |
| rs3748805 | NP_789823 | L | R | LR | possibly damaging |
| rs3748811 | NP_078895 | A | V | AV | benign            |
| rs3748816 | NP_258428 | M | T | MT | benign            |
| rs3748867 | NP_061027 | R | P | RP | possibly damaging |
| rs3748932 | NP_004845 | D | N | DN | benign            |
| rs3748961 | NP_005226 | R | Q | RQ | benign            |
| rs3748976 | NP_060810 | D | A | DA | benign            |
| rs3748980 | NP_060810 | V | I | VI | benign            |
| rs3748982 | NP_060810 | N | S | NS | benign            |
| rs3748993 | XP_041126 | T | P | TP | possibly damaging |
| rs3749002 | XP_496606 | G | D | GD | benign            |
| rs3749003 | XP_496606 | Y | C | YC | probably damaging |
| rs3749005 | XP_496607 | R | G | RG | possibly damaging |
| rs3749006 | XP_496607 | V | G | VG | probably damaging |
| rs3749029 | NP_008851 | R | H | RH | possibly damaging |
| rs3749031 | NP_079029 | R | Q | RQ | benign            |
| rs3749036 | XP_371581 | A | T | AT | benign            |
| rs3749073 | NP_005674 | G | V | GV | probably damaging |
| rs3749081 | XP_371542 | P | R | PR | possibly damaging |
| rs3749130 | XP_376060 | R | W | RW | possibly damaging |
| rs3749131 | XP_376060 | N | S | NS | possibly damaging |
| rs3749143 | NP_758515 | S | P | SP | benign            |
| rs3749143 | NP_006864 | S | P | SP | benign            |
| rs3749171 | NP_005292 | T | M | TM | benign            |
| rs3749172 | NP_005292 | S | R | SR | benign            |
| rs3749191 | NP_073753 | Q | R | QR | benign            |
| rs3749195 | NP_003232 | R | C | RC | possibly damaging |
| rs3749271 | NP_848540 | K | N | KN | benign            |
| rs3749298 | NP_665696 | P | S | PS | benign            |
| rs3749323 | NP_055230 | G | S | GS | benign            |
| rs3749370 | NP_699161 | S | L | SL | probably damaging |

|           |           |   |   |    |                   |
|-----------|-----------|---|---|----|-------------------|
| rs3749383 | NP_002213 | I | V | IV | benign            |
| rs3749422 | NP_065977 | G | E | GE | probably damaging |
| rs3749422 | NP_060215 | G | E | GE | probably damaging |
| rs3749471 | NP_060109 | L | P | LP | possibly damaging |
| rs3749499 | XP_037817 | E | D | ED | benign            |
| rs3749509 | XP_371717 | S | C | SC | benign            |
| rs3749574 | NP_006717 | A | T | AT | benign            |
| rs3749591 | XP_052597 | S | R | SR | benign            |
| rs3749598 | NP_064501 | D | Y | DY | probably damaging |
| rs3749612 | NP_079062 | V | I | VI | benign            |
| rs3749671 | NP_054899 | G | S | GS | possibly damaging |
| rs3749736 | NP_055605 | V | I | VI | benign            |
| rs3749737 | NP_003990 | P | S | PS | possibly damaging |
| rs3749741 | NP_955367 | K | R | KR | benign            |
| rs3749741 | NP_001456 | K | R | KR | benign            |
| rs3749745 | NP_061170 | Q | E | QE | benign            |
| rs3749760 | NP_258260 | N | K | NK | possibly damaging |
| rs3749767 | NP_115271 | A | T | AT | benign            |
| rs3749767 | NP_061749 | A | T | AT | benign            |
| rs3749768 | NP_115271 | P | S | PS | benign            |
| rs3749768 | NP_061749 | P | S | PS | benign            |
| rs3749779 | NP_114153 | V | G | VG | probably damaging |
| rs3749780 | NP_114153 | V | I | VI | benign            |
| rs3749817 | XP_048786 | T | M | TM | benign            |
| rs3749822 | NP_940969 | P | L | PL | benign            |
| rs3749894 | XP_371844 | A | T | AT | benign            |
| rs3749895 | XP_371844 | A | P | AP | benign            |
| rs3749903 | NP_149103 | A | G | AG | benign            |
| rs3749930 | NP_056533 | T | K | TK | benign            |
| rs3749960 | NP_061978 | F | Y | FY | benign            |
| rs3749966 | NP_006772 | I | V | IV | benign            |
| rs3749971 | NP_112221 | T | I | TI | possibly damaging |
| rs3749977 | XP_498070 | R | Q | RQ | benign            |
| rs3750009 | NP_064529 | N | K | NK | benign            |
| rs3750010 | NP_064529 | K | R | KR | benign            |
| rs3750050 | NP_002826 | T | A | TA | benign            |
| rs3750103 | NP_004058 | H | R | HR | possibly damaging |
| rs3750146 | NP_003496 | V | M | VM | benign            |
| rs3750206 | NP_055932 | F | Y | FY | benign            |
| rs3750207 | NP_055932 | E | D | ED | benign            |
| rs3750208 | NP_055932 | R | W | RW | benign            |
| rs3750228 | NP_078780 | K | E | KE | benign            |
| rs3750266 | NP_112220 | L | F | LF | benign            |
| rs3750300 | NP_057317 | I | V | IV | benign            |
| rs3750308 | XP_098762 | F | L | FL | benign            |
| rs3750378 | NP_689499 | Q | E | QE | benign            |

|           |           |   |   |    |                   |
|-----------|-----------|---|---|----|-------------------|
| rs3750379 | NP_689499 | E | D | ED | benign            |
| rs3750384 | NP_620133 | A | V | AV | benign            |
| rs3750425 | NP_060132 | V | I | VI | benign            |
| rs3750427 | XP_048462 | P | L | PL | possibly damaging |
| rs3750428 | XP_048462 | E | A | EA | possibly damaging |
| rs3750478 | NP_002166 | K | E | KE | benign            |
| rs3750480 | NP_066546 | E | V | EV | benign            |
| rs3750501 | NP_981948 | S | G | SG | benign            |
| rs3750533 | NP_659488 | T | A | TA | benign            |
| rs3750534 | NP_659488 | R | Q | RQ | benign            |
| rs3750575 | NP_004025 | R | Q | RQ | benign            |
| rs3750575 | NP_001147 | R | Q | RQ | benign            |
| rs3750587 | NP_060079 | L | F | LF | benign            |
| rs3750673 | NP_061172 | G | S | GS | benign            |
| rs3750674 | NP_061172 | T | A | TA | benign            |
| rs3750690 | NP_997186 | Q | L | QL | probably damaging |
| rs3750784 | NP_060096 | E | K | EK | possibly damaging |
| rs3750819 | NP_075260 | R | P | RP | benign            |
| rs3750819 | NP_075258 | R | P | RP | possibly damaging |
| rs3750819 | NP_075259 | R | P | RP | possibly damaging |
| rs3750819 | NP_075261 | R | P | RP | possibly damaging |
| rs3750819 | NP_075262 | R | P | RP | possibly damaging |
| rs3750819 | NP_075263 | R | P | RP | possibly damaging |
| rs3750819 | NP_075265 | R | P | RP | possibly damaging |
| rs3750819 | NP_075417 | R | P | RP | possibly damaging |
| rs3750819 | NP_075419 | R | P | RP | possibly damaging |
| rs3750819 | NP_075420 | R | P | RP | possibly damaging |
| rs3750819 | NP_075264 | R | P | RP | possibly damaging |
| rs3750819 | NP_000132 | R | P | RP | possibly damaging |
| rs3750819 | NP_075418 | R | P | RP | probably damaging |
| rs3750823 | NP_079032 | S | G | SG | benign            |
| rs3750824 | NP_002403 | R | Q | RQ | possibly damaging |
| rs3750843 | NP_996742 | N | S | NS | benign            |
| rs3750843 | NP_996743 | N | S | NS | benign            |
| rs3750843 | NP_996744 | N | S | NS | benign            |
| rs3750843 | NP_008928 | N | S | NS | benign            |
| rs3750898 | NP_055696 | H | D | HD | possibly damaging |
| rs3750904 | NP_002968 | D | G | DG | benign            |
| rs3750913 | NP_006176 | A | G | AG | benign            |
| rs3750925 | NP_000833 | F | S | FS | benign            |
| rs3750943 | NP_115503 | R | L | RL | benign            |
| rs3750944 | NP_115503 | T | M | TM | possibly damaging |
| rs3750965 | NP_620714 | K | R | KR | benign            |
| rs3750982 | NP_689931 | P | R | PR | possibly damaging |
| rs3751037 | XP_374949 | V | L | VL | benign            |
| rs3751054 | NP_066025 | T | A | TA | possibly damaging |

|           |           |   |   |    |                   |
|-----------|-----------|---|---|----|-------------------|
| rs3751055 | NP_066025 | T | M | TM | benign            |
| rs3751057 | NP_066025 | T | S | TS | benign            |
| rs3751059 | NP_066025 | P | R | PR | probably damaging |
| rs3751066 | NP_065694 | P | A | PA | benign            |
| rs3751093 | NP_002299 | G | S | GS | benign            |
| rs3751093 | NP_033665 | G | S | GS | benign            |
| rs3751095 | NP_112168 | A | T | AT | benign            |
| rs3751096 | NP_112168 | D | E | DE | benign            |
| rs3751107 | NP_077006 | G | D | GD | benign            |
| rs3751108 | NP_077006 | D | N | DN | benign            |
| rs3751109 | NP_077006 | L | P | LP | benign            |
| rs3751112 | NP_071894 | V | A | VA | benign            |
| rs3751143 | NP_002553 | E | A | EA | benign            |
| rs3751197 | NP_060034 | Y | S | YS | probably damaging |
| rs3751223 | XP_292021 | T | M | TM | benign            |
| rs3751262 | NP_477517 | D | N | DN | benign            |
| rs3751303 | XP_495939 | P | S | PS | possibly damaging |
| rs3751315 | XP_495939 | P | L | PL | possibly damaging |
| rs3751325 | NP_150592 | S | C | SC | benign            |
| rs3751336 | XP_166270 | T | I | TI | possibly damaging |
| rs3751353 | NP_848635 | G | A | GA | possibly damaging |
| rs3751356 | XP_370715 | R | Q | RQ | benign            |
| rs3751357 | NP_848635 | V | M | VM | benign            |
| rs3751362 | NP_683760 | V | I | VI | benign            |
| rs3751362 | NP_061117 | V | I | VI | benign            |
| rs3751379 | NP_733837 | V | A | VA | benign            |
| rs3751386 | NP_068773 | P | L | PL | probably damaging |
| rs3751449 | NP_005195 | A | T | AT | benign            |
| rs3751489 | NP_004986 | R | H | RH | possibly damaging |
| rs3751495 | NP_068763 | D | N | DN | benign            |
| rs3751501 | NP_055792 | S | F | SF | benign            |
| rs3751534 | NP_002528 | P | S | PS | possibly damaging |
| rs3751593 | NP_699205 | I | V | IV | benign            |
| rs3751655 | NP_064595 | S | A | SA | benign            |
| rs3751655 | NP_945119 | S | A | SA | benign            |
| rs3751664 | NP_066921 | R | C | RC | probably damaging |
| rs3751672 | NP_478072 | L | P | LP | possibly damaging |
| rs3751682 | NP_705900 | P | L | PL | probably damaging |
| rs3751682 | NP_055242 | P | L | PL | probably damaging |
| rs3751721 | NP_055430 | P | L | PL | probably damaging |
| rs3751727 | NP_060036 | L | V | LV | benign            |
| rs3751821 | NP_055526 | P | L | PL | possibly damaging |
| rs3751848 | NP_078947 | A | S | AS | benign            |
| rs3751856 | NP_055514 | R | Q | RQ | benign            |
| rs3751886 | NP_066921 | E | G | EG | possibly damaging |
| rs3751981 | NP_683684 | R | Q | RQ | benign            |

|           |           |   |   |    |                   |
|-----------|-----------|---|---|----|-------------------|
| rs3752015 | XP_371024 | F | L | FL | benign            |
| rs3752016 | XP_371024 | G | R | GR | possibly damaging |
| rs3752032 | NP_066292 | R | Q | RQ | possibly damaging |
| rs3752033 | NP_066292 | R | Q | RQ | benign            |
| rs3752034 | NP_066292 | R | H | RH | possibly damaging |
| rs3752036 | NP_066292 | R | P | RP | probably damaging |
| rs3752074 | NP_031371 | H | N | HN | probably damaging |
| rs3752078 | NP_031371 | A | T | AT | benign            |
| rs3752094 | NP_001933 | D | N | DN | benign            |
| rs3752095 | NP_001933 | Y | F | YF | benign            |
| rs3752101 | XP_058931 | R | H | RH | probably damaging |
| rs3752105 | NP_542418 | R | K | RK | benign            |
| rs3752105 | NP_075387 | R | K | RK | benign            |
| rs3752107 | NP_542418 | A | T | AT | benign            |
| rs3752107 | NP_075387 | A | T | AT | benign            |
| rs3752109 | NP_932172 | R | H | RH | benign            |
| rs3752110 | NP_932172 | R | H | RH | benign            |
| rs3752111 | NP_932172 | R | Q | RQ | benign            |
| rs3752135 | NP_201586 | Y | S | YS | benign            |
| rs3752135 | NP_443729 | Y | S | YS | possibly damaging |
| rs3752153 | NP_066358 | R | Q | RQ | benign            |
| rs3752176 | NP_065864 | G | D | GD | benign            |
| rs3752179 | XP_371198 | K | R | KR | benign            |
| rs3752187 | NP_038475 | S | F | SF | benign            |
| rs3752187 | NP_690880 | S | F | SF | benign            |
| rs3752187 | NP_690881 | S | F | SF | benign            |
| rs3752187 | NP_690883 | S | F | SF | benign            |
| rs3752187 | NP_690884 | S | F | SF | benign            |
| rs3752187 | NP_690885 | S | F | SF | benign            |
| rs3752187 | NP_690882 | S | F | SF | possibly damaging |
| rs3752199 | NP_065984 | Q | H | QH | benign            |
| rs3752220 | NP_004137 | R | G | RG | possibly damaging |
| rs3752232 | NP_150651 | T | A | TA | benign            |
| rs3752232 | NP_061985 | T | A | TA | benign            |
| rs3752233 | NP_150651 | R | H | RH | benign            |
| rs3752233 | NP_061985 | R | H | RH | benign            |
| rs3752239 | NP_061985 | N | T | NT | benign            |
| rs3752239 | NP_150651 | N | T | NT | possibly damaging |
| rs3752246 | NP_150651 | A | G | AG | benign            |
| rs3752246 | NP_061985 | A | G | AG | benign            |
| rs3752289 | NP_079131 | P | L | PL | probably damaging |
| rs3752321 | NP_078928 | E | K | EK | benign            |
| rs3752334 | NP_056234 | A | T | AT | benign            |
| rs3752354 | NP_940956 | M | V | MV | benign            |
| rs3752354 | NP_071348 | M | V | MV | benign            |
| rs3752362 | NP_005035 | V | A | VA | benign            |

|           |           |   |   |    |                   |
|-----------|-----------|---|---|----|-------------------|
| rs3752364 | NP_689573 | P | L | PL | benign            |
| rs3752365 | NP_689573 | G | A | GA | possibly damaging |
| rs3752368 | NP_570857 | V | M | VM | benign            |
| rs3752368 | NP_570858 | V | M | VM | benign            |
| rs3752368 | NP_002838 | V | M | VM | benign            |
| rs3752472 | NP_004786 | P | S | PS | probably damaging |
| rs3752472 | NP_710150 | P | S | PS | probably damaging |
| rs3752504 | NP_733799 | R | Q | RQ | benign            |
| rs3752505 | NP_733799 | R | W | RW | probably damaging |
| rs3752506 | NP_733799 | G | S | GS | benign            |
| rs3752506 | NP_056518 | G | S | GS | possibly damaging |
| rs3752516 | NP_003276 | G | S | GS | benign            |
| rs3752536 | NP_277050 | T | A | TA | benign            |
| rs3752566 | NP_002935 | R | H | RH | possibly damaging |
| rs3752579 | NP_002281 | L | H | LH | benign            |
| rs3752630 | NP_612350 | C | G | CG | probably damaging |
| rs3752704 | NP_065741 | N | S | NS | benign            |
| rs3752704 | NP_060217 | N | S | NS | benign            |
| rs3752780 | NP_079415 | R | H | RH | benign            |
| rs3752838 | NP_055111 | T | A | TA | benign            |
| rs3752840 | XP_371783 | I | T | IT | benign            |
| rs3752840 | NP_775934 | T | I | TI | benign            |
| rs3752841 | NP_775934 | A | T | AT | benign            |
| rs3752841 | XP_371783 | T | A | TA | benign            |
| rs3752873 | XP_376310 | P | L | PL | benign            |
| rs3753058 | NP_000064 | V | F | VF | possibly damaging |
| rs3753494 | NP_000636 | P | S | PS | probably damaging |
| rs3753494 | NP_000637 | P | S | PS | probably damaging |
| rs3753494 | NP_000635 | P | S | PS | probably damaging |
| rs3753565 | NP_003283 | S | N | SN | benign            |
| rs3753952 | NP_982284 | P | L | PL | possibly damaging |
| rs3754112 | NP_004249 | N | S | NS | benign            |
| rs3754274 | NP_067056 | R | K | RK | benign            |
| rs3754413 | NP_002212 | A | T | AT | benign            |
| rs3754414 | NP_002212 | S | P | SP | possibly damaging |
| rs3754415 | NP_002212 | R | H | RH | benign            |
| rs3754416 | NP_002212 | P | L | PL | probably damaging |
| rs3754689 | NP_002290 | V | I | VI | benign            |
| rs3754813 | NP_003102 | A | T | AT | benign            |
| rs3755072 | NP_060549 | K | R | KR | benign            |
| rs3755073 | NP_060549 | V | F | VF | benign            |
| rs3755260 | NP_002140 | G | S | GS | probably damaging |
| rs3755260 | NP_602293 | G | S | GS | probably damaging |
| rs3755320 | NP_061951 | H | N | HN | benign            |
| rs3755321 | NP_061951 | L | P | LP | possibly damaging |
| rs3755322 | NP_061951 | D | E | DE | benign            |



|           |           |   |   |    |                   |
|-----------|-----------|---|---|----|-------------------|
| rs3755323 | NP_061951 | L | S | LS | benign            |
| rs3755544 | XP_371514 | G | R | GR | benign            |
| rs3755545 | XP_371514 | P | L | PL | probably damaging |
| rs3755652 | NP_003606 | K | E | KE | benign            |
| rs3755955 | NP_000194 | R | Q | RQ | benign            |
| rs3756065 | NP_031377 | T | A | TA | benign            |
| rs3756275 | NP_114159 | I | V | IV | benign            |
| rs3756293 | NP_057424 | S | A | SA | benign            |
| rs3756323 | NP_061754 | Q | R | QR | benign            |
| rs3756331 | NP_061734 | S | N | SN | benign            |
| rs3756331 | NP_114062 | S | N | SN | possibly damaging |
| rs3756332 | NP_114062 | A | G | AG | possibly damaging |
| rs3756332 | NP_061734 | A | G | AG | possibly damaging |
| rs3756333 | NP_114062 | G | R | GR | possibly damaging |
| rs3756333 | NP_061734 | G | R | GR | possibly damaging |
| rs3756669 | NP_689617 | C | G | CG | probably damaging |
| rs3756672 | NP_001360 | R | W | RW | probably damaging |
| rs3756772 | NP_002022 | G | R | GR | benign            |
| rs3756987 | NP_114130 | G | D | GD | benign            |
| rs3757370 | NP_064716 | I | V | IV | benign            |
| rs3758036 | NP_005766 | P | L | PL | probably damaging |
| rs3758037 | NP_005766 | D | H | DH | possibly damaging |
| rs3758122 | NP_054828 | I | T | IT | benign            |
| rs3758383 | NP_057279 | A | G | AG | benign            |
| rs3758387 | NP_057279 | I | V | IV | benign            |
| rs3758388 | NP_057279 | H | L | HL | benign            |
| rs3758390 | NP_057279 | I | V | IV | benign            |
| rs3758449 | NP_059129 | S | N | SN | possibly damaging |
| rs3758458 | NP_062565 | E | Q | EQ | benign            |
| rs3758459 | NP_062565 | D | N | DN | benign            |
| rs3758526 | NP_071896 | E | A | EA | benign            |
| rs3758581 | NP_000760 | I | V | IV | benign            |
| rs3758805 | NP_005779 | L | V | LV | benign            |
| rs3758938 | NP_005986 | K | T | KT | possibly damaging |
| rs3759122 | XP_495916 | K | N | KN | benign            |
| rs3759244 | NP_795367 | F | L | FL | benign            |
| rs3759245 | NP_795367 | R | C | RC | possibly damaging |
| rs3759246 | NP_795366 | R | T | RT | benign            |
| rs3759246 | NP_795367 | R | T | RT | probably damaging |
| rs3759251 | NP_076408 | T | S | TS | benign            |
| rs3759259 | NP_060893 | G | S | GS | benign            |
| rs3759295 | XP_495919 | H | P | HP | probably damaging |
| rs3759601 | NP_060506 | E | Q | EQ | benign            |
| rs3759786 | NP_060328 | A | S | AS | benign            |
| rs3759787 | NP_060328 | L | P | LP | benign            |
| rs3759871 | NP_079413 | S | F | SF | possibly damaging |

|           |           |   |   |    |                   |
|-----------|-----------|---|---|----|-------------------|
| rs3759872 | NP_079413 | C | Y | CY | possibly damaging |
| rs3759873 | NP_079413 | I | V | IV | benign            |
| rs3759875 | NP_079413 | Y | C | YC | probably damaging |
| rs3759880 | NP_542783 | A | V | AV | benign            |
| rs3760128 | NP_775818 | L | P | LP | possibly damaging |
| rs3760299 | NP_065703 | Y | H | YH | benign            |
| rs3760317 | NP_060597 | D | N | DN | possibly damaging |
| rs3760413 | NP_689676 | D | E | DE | benign            |
| rs3760436 | NP_001363 | R | W | RW | probably damaging |
| rs3760436 | NP_004653 | R | W | RW | probably damaging |
| rs3760454 | NP_060898 | R | Q | RQ | benign            |
| rs3760460 | NP_003684 | G | V | GV | probably damaging |
| rs3760460 | NP_663327 | G | V | GV | probably damaging |
| rs3760791 | NP_060743 | G | V | GV | probably damaging |
| rs3760849 | NP_071386 | K | R | KR | benign            |
| rs3761097 | NP_067055 | R | Q | RQ | benign            |
| rs3761185 | NP_848586 | S | Y | SY | benign            |
| rs3761472 | NP_056195 | D | G | DG | possibly damaging |
| rs3761505 | XP_050478 | I | T | IT | benign            |
| rs3761506 | XP_050478 | R | H | RH | benign            |
| rs3761568 | XP_377014 | M | V | MV | benign            |
| rs3761592 | XP_172801 | I | F | IF | benign            |
| rs3761645 | NP_071763 | D | N | DN | benign            |
| rs3761645 | NP_660095 | D | N | DN | benign            |
| rs3761698 | NP_006334 | T | I | TI | benign            |
| rs3761863 | XP_058513 | M | T | MT | benign            |
| rs3761966 | NP_060899 | R | C | RC | possibly damaging |
| rs3761967 | NP_060899 | V | M | VM | benign            |
| rs3762001 | NP_114409 | H | Y | HY | possibly damaging |
| rs3762002 | NP_114409 | M | V | MV | benign            |
| rs3762006 | XP_376540 | R | G | RG | probably damaging |
| rs3762175 | XP_498469 | I | M | IM | benign            |
| rs3762271 | NP_060606 | L | I | LI | benign            |
| rs3762425 | XP_375718 | T | S | TS | benign            |
| rs3762448 | NP_005790 | R | H | RH | benign            |
| rs3762448 | NP_795352 | R | H | RH | benign            |
| rs3762448 | NP_795353 | R | H | RH | benign            |
| rs3762568 | NP_055744 | S | N | SN | benign            |
| rs3762578 | NP_055483 | V | I | VI | benign            |
| rs3762579 | NP_055483 | R | Q | RQ | benign            |
| rs3762648 | NP_060659 | V | I | VI | benign            |
| rs3762685 | NP_065086 | S | N | SN | benign            |
| rs3762696 | NP_055244 | D | E | DE | benign            |
| rs3762697 | NP_055244 | M | V | MV | possibly damaging |
| rs3762739 | NP_689886 | S | C | SC | benign            |
| rs3762836 | NP_004889 | H | R | HR | benign            |

|           |           |   |   |    |                   |
|-----------|-----------|---|---|----|-------------------|
| rs3762891 | NP_619643 | S | C | SC | possibly damaging |
| rs3763118 | NP_056071 | V | M | VM | possibly damaging |
| rs3763611 | NP_620133 | S | P | SP | benign            |
| rs3763695 | NP_937781 | V | A | VA | benign            |
| rs3763695 | NP_056305 | V | A | VA | benign            |
| rs3763978 | NP_004607 | G | A | GA | possibly damaging |
| rs3763980 | NP_004722 | T | S | TS | benign            |
| rs3764002 | XP_033113 | T | I | TI | possibly damaging |
| rs3764022 | NP_037401 | L | V | LV | benign            |
| rs3764034 | NP_079235 | L | F | LF | benign            |
| rs3764147 | NP_694950 | V | I | VI | benign            |
| rs3764187 | NP_003913 | L | F | LF | benign            |
| rs3764340 | NP_061030 | P | A | PA | probably damaging |
| rs3764378 | NP_061869 | D | N | DN | benign            |
| rs3764418 | NP_057070 | V | M | VM | benign            |
| rs3764421 | NP_079133 | N | H | NH | benign            |
| rs3764424 | NP_116254 | P | L | PL | probably damaging |
| rs3764507 | XP_058931 | A | V | AV | benign            |
| rs3764508 | XP_058931 | G | S | GS | possibly damaging |
| rs3764522 | NP_115812 | L | V | LV | benign            |
| rs3764537 | XP_030892 | H | R | HR | possibly damaging |
| rs3764539 | NP_067645 | E | K | EK | benign            |
| rs3764548 | NP_009078 | C | R | CR | probably damaging |
| rs3764565 | XP_029084 | K | R | KR | benign            |
| rs3764609 | NP_071907 | Q | R | QR | benign            |
| rs3764609 | NP_690009 | Q | R | QR | benign            |
| rs3764609 | NP_690008 | Q | R | QR | benign            |
| rs3764609 | NP_690007 | Q | R | QR | benign            |
| rs3764626 | NP_115809 | A | V | AV | benign            |
| rs3764633 | NP_116205 | R | W | RW | benign            |
| rs3764645 | NP_150651 | E | G | EG | benign            |
| rs3764645 | NP_061985 | E | G | EG | possibly damaging |
| rs3764647 | NP_061985 | H | R | HR | benign            |
| rs3764647 | NP_150651 | H | R | HR | possibly damaging |
| rs3764656 | NP_954672 | D | N | DN | benign            |
| rs3764656 | NP_057669 | D | N | DN | benign            |
| rs3764690 | NP_955473 | N | S | NS | benign            |
| rs3764698 | NP_065069 | D | G | DG | possibly damaging |
| rs3764738 | NP_078928 | V | D | VD | benign            |
| rs3764740 | NP_078928 | T | M | TM | benign            |
| rs3764758 | XP_033173 | R | C | RC | possibly damaging |
| rs3764779 | NP_997708 | Q | E | QE | benign            |
| rs3764850 | NP_005954 | Q | H | QH | benign            |
| rs3764867 | NP_000864 | R | Q | RQ | benign            |
| rs3764872 | NP_002333 | G | R | GR | benign            |
| rs3764880 | NP_619542 | M | V | MV | benign            |

|           |           |   |   |    |                   |
|-----------|-----------|---|---|----|-------------------|
| rs3764897 | NP_002654 | G | S | GS | benign            |
| rs3764944 | NP_059447 | R | Q | RQ | possibly damaging |
| rs3764945 | NP_054740 | A | T | AT | benign            |
| rs3764990 | NP_659458 | P | S | PS | probably damaging |
| rs3765004 | NP_660350 | K | T | KT | benign            |
| rs3765038 | NP_579917 | R | Q | RQ | possibly damaging |
| rs3765038 | NP_579922 | R | Q | RQ | possibly damaging |
| rs3765038 | NP_579919 | R | Q | RQ | possibly damaging |
| rs3765083 | NP_073573 | V | I | VI | benign            |
| rs3765101 | NP_055704 | Q | H | QH | possibly damaging |
| rs3765124 | NP_055294 | N | S | NS | benign            |
| rs3765148 | NP_055290 | G | R | GR | possibly damaging |
| rs3765163 | NP_004309 | G | R | GR | possibly damaging |
| rs3765163 | NP_115857 | G | R | GR | possibly damaging |
| rs3765163 | NP_115855 | G | R | GR | possibly damaging |
| rs3765201 | NP_004124 | M | R | MR | probably damaging |
| rs3765263 | NP_071375 | K | R | KR | benign            |
| rs3765310 | NP_733936 | P | L | PL | possibly damaging |
| rs3765310 | NP_001071 | P | L | PL | probably damaging |
| rs3765407 | NP_361013 | K | Q | KQ | benign            |
| rs3765409 | NP_361013 | G | S | GS | benign            |
| rs3765467 | NP_002053 | R | Q | RQ | benign            |
| rs3765519 | NP_877428 | G | W | GW | probably damaging |
| rs3765519 | NP_060988 | G | W | GW | probably damaging |
| rs3765534 | NP_005836 | E | K | EK | benign            |
| rs3765571 | NP_002851 | S | Y | SY | benign            |
| rs3765620 | NP_002415 | T | I | TI | benign            |
| rs3765623 | NP_003794 | D | N | DN | benign            |
| rs3766158 | NP_060492 | R | Q | RQ | benign            |
| rs3766160 | NP_056933 | N | D | ND | benign            |
| rs3766163 | NP_006502 | F | L | FL | probably damaging |
| rs3766317 | NP_003026 | A | V | AV | benign            |
| rs3766497 | XP_378184 | R | L | RL | possibly damaging |
| rs3766498 | XP_378184 | P | L | PL | probably damaging |
| rs3766664 | NP_055627 | T | I | TI | possibly damaging |
| rs3766870 | NP_001026 | E | D | ED | benign            |
| rs3766871 | NP_001026 | G | S | GS | benign            |
| rs3767261 | NP_057205 | R | G | RG | possibly damaging |
| rs3767607 | NP_002548 | V | M | VM | possibly damaging |
| rs3767608 | NP_002548 | P | S | PS | possibly damaging |
| rs3767609 | NP_002548 | S | G | SG | benign            |
| rs3767610 | NP_002548 | H | Y | HY | possibly damaging |
| rs3768067 | NP_000072 | H | R | HR | probably damaging |
| rs3768235 | NP_003912 | G | E | GE | benign            |
| rs3768249 | NP_004379 | D | Y | DY | possibly damaging |
| rs3768721 | NP_659198 | G | R | GR | possibly damaging |

|           |           |   |   |    |                   |
|-----------|-----------|---|---|----|-------------------|
| rs3769148 | NP_057737 | L | S | LS | possibly damaging |
| rs3769838 | NP_004501 | M | V | MV | benign            |
| rs3769838 | NP_536349 | M | V | MV | benign            |
| rs3769838 | NP_004500 | M | V | MV | benign            |
| rs3769969 | NP_004171 | R | Q | RQ | benign            |
| rs3770213 | XP_376172 | L | H | LH | benign            |
| rs3770214 | XP_376172 | S | G | SG | benign            |
| rs3770436 | NP_056345 | S | F | SF | benign            |
| rs3770655 | NP_061875 | P | S | PS | benign            |
| rs3770656 | NP_061875 | P | L | PL | probably damaging |
| rs3770657 | NP_061875 | S | N | SN | benign            |
| rs3770719 | NP_060127 | I | V | IV | benign            |
| rs3770739 | NP_060127 | N | S | NS | benign            |
| rs3770740 | NP_060127 | E | K | EK | benign            |
| rs3771333 | NP_060880 | E | D | ED | benign            |
| rs3772119 | NP_006587 | V | I | VI | benign            |
| rs3772119 | NP_955452 | V | I | VI | benign            |
| rs3772165 | NP_060545 | R | Q | RQ | benign            |
| rs3772173 | NP_005405 | V | A | VA | benign            |
| rs3772219 | NP_062455 | L | V | LV | benign            |
| rs3772809 | NP_000364 | I | V | IV | benign            |
| rs3772986 | NP_004935 | R | H | RH | benign            |
| rs3774266 | NP_001870 | G | R | GR | probably damaging |
| rs3774395 | NP_000720 | R | W | RW | probably damaging |
| rs3774729 | NP_000324 | V | M | VM | benign            |
| rs3775091 | NP_149106 | E | Q | EQ | benign            |
| rs3775291 | NP_003256 | L | F | LF | benign            |
| rs3775481 | NP_031377 | C | Y | CY | benign            |
| rs3776070 | NP_000103 | T | S | TS | benign            |
| rs3776096 | NP_061762 | V | I | VI | benign            |
| rs3776097 | NP_061762 | P | L | PL | possibly damaging |
| rs3776099 | NP_061761 | A | T | AT | possibly damaging |
| rs3777084 | NP_060255 | S | L | SL | possibly damaging |
| rs3778005 | NP_001554 | S | N | SN | benign            |
| rs3778142 | NP_000417 | Y | H | YH | benign            |
| rs3778922 | NP_071370 | D | Y | DY | probably damaging |
| rs3779062 | NP_004751 | E | Q | EQ | benign            |
| rs3779234 | NP_071768 | T | A | TA | benign            |
| rs3779536 | NP_065102 | A | S | AS | benign            |
| rs3779620 | NP_060962 | N | S | NS | benign            |
| rs3779725 | NP_079302 | G | R | GR | possibly damaging |
| rs3779727 | NP_079302 | N | S | NS | benign            |
| rs3780220 | NP_001113 | L | F | LF | benign            |
| rs3780548 | XP_376895 | C | R | CR | probably damaging |
| rs3780679 | NP_060719 | R | T | RT | benign            |
| rs3781365 | XP_374831 | R | Q | RQ | benign            |

|           |           |   |   |    |                   |
|-----------|-----------|---|---|----|-------------------|
| rs3781408 | NP_073713 | D | N | DN | benign            |
| rs3781409 | NP_073713 | V | M | VM | benign            |
| rs3781411 | NP_073713 | R | Q | RQ | benign            |
| rs3781412 | NP_073713 | L | P | LP | possibly damaging |
| rs3781986 | NP_057174 | H | R | HR | probably damaging |
| rs3782369 | NP_877499 | I | M | IM | benign            |
| rs3782489 | NP_778253 | T | M | TM | possibly damaging |
| rs3783082 | NP_061911 | N | K | NK | benign            |
| rs3783167 | NP_005821 | N | D | ND | benign            |
| rs3783531 | NP_000566 | R | Q | RQ | possibly damaging |
| rs3783581 | NP_000566 | D | N | DN | possibly damaging |
| rs3783611 | NP_001069 | S | F | SF | possibly damaging |
| rs3783612 | NP_001069 | T | A | TA | benign            |
| rs3783613 | NP_542413 | G | A | GA | benign            |
| rs3783613 | NP_001069 | G | A | GA | possibly damaging |
| rs3783615 | NP_542413 | I | L | IL | benign            |
| rs3783615 | NP_001069 | I | L | IL | benign            |
| rs3783696 | NP_055564 | S | N | SN | benign            |
| rs3783697 | NP_055564 | D | G | DG | possibly damaging |
| rs3784543 | NP_031390 | D | N | DN | possibly damaging |
| rs3784587 | NP_002411 | R | G | RG | possibly damaging |
| rs3784588 | NP_002411 | V | I | VI | benign            |
| rs3784634 | NP_060154 | R | K | RK | benign            |
| rs3784635 | NP_060154 | I | V | IV | benign            |
| rs3785522 | NP_005984 | E | G | EG | probably damaging |
| rs3786349 | NP_059982 | S | F | SF | benign            |
| rs3786417 | NP_036321 | T | M | TM | benign            |
| rs3786417 | NP_722452 | T | M | TM | benign            |
| rs3786417 | NP_722454 | T | M | TM | benign            |
| rs3786417 | NP_722453 | T | M | TM | benign            |
| rs3786490 | NP_060770 | T | I | TI | benign            |
| rs3787375 | NP_004789 | G | E | GE | benign            |
| rs3789683 | NP_001984 | G | E | GE | benign            |
| rs3790267 | NP_065740 | V | I | VI | benign            |
| rs3790525 | NP_015563 | Q | P | QP | possibly damaging |
| rs3790525 | NP_015562 | Q | P | QP | possibly damaging |
| rs3790525 | NP_004790 | Q | P | QP | possibly damaging |
| rs3790549 | NP_056651 | A | P | AP | benign            |
| rs3791251 | NP_002967 | V | L | VL | benign            |
| rs3792234 | NP_758515 | Q | H | QH | benign            |
| rs3792234 | NP_006864 | Q | H | QH | benign            |
| rs3792245 | NP_751946 | A | V | AV | benign            |
| rs3792245 | NP_006863 | A | V | AV | benign            |
| rs3792268 | NP_075572 | P | T | PT | possibly damaging |
| rs3792268 | NP_075573 | P | T | PT | possibly damaging |
| rs3792268 | NP_075574 | P | T | PT | possibly damaging |

|           |           |   |   |    |                   |
|-----------|-----------|---|---|----|-------------------|
| rs3792268 | NP_075575 | P | T | PT | possibly damaging |
| rs3792268 | NP_075571 | P | T | PT | possibly damaging |
| rs3792594 | NP_037506 | A | T | AT | benign            |
| rs3792646 | NP_000578 | K | Q | KQ | benign            |
| rs3792683 | NP_000244 | N | S | NS | benign            |
| rs3792687 | NP_006086 | T | M | TM | possibly damaging |
| rs3793405 | NP_062825 | G | R | GR | probably damaging |
| rs3793524 | NP_002820 | A | P | AP | probably damaging |
| rs3793706 | NP_937781 | L | F | LF | benign            |
| rs3793706 | NP_056305 | L | F | LF | benign            |
| rs3793733 | NP_061172 | A | T | AT | benign            |
| rs3793744 | NP_001767 | V | I | VI | benign            |
| rs3793771 | NP_003384 | C | S | CS | probably damaging |
| rs3793795 | NP_065574 | A | T | AT | benign            |
| rs3793795 | NP_066266 | A | T | AT | benign            |
| rs3793795 | NP_066265 | A | T | AT | benign            |
| rs3793795 | NP_066264 | A | T | AT | benign            |
| rs3793988 | XP_497311 | T | M | TM | possibly damaging |
| rs3794084 | NP_055447 | D | E | DE | benign            |
| rs3794153 | NP_005409 | K | N | KN | benign            |
| rs3794153 | NP_998783 | K | N | KN | benign            |
| rs3794255 | XP_370702 | E | K | EK | benign            |
| rs3794873 | NP_031371 | S | G | SG | benign            |
| rs3795243 | NP_071741 | M | I | MI | benign            |
| rs3795251 | NP_543144 | S | N | SN | benign            |
| rs3795263 | NP_536356 | G | R | GR | possibly damaging |
| rs3795299 | NP_067081 | R | G | RG | benign            |
| rs3795322 | NP_110439 | R | C | RC | possibly damaging |
| rs3795331 | NP_064510 | V | M | VM | benign            |
| rs3795339 | NP_002232 | R | H | RH | benign            |
| rs3795374 | NP_115811 | E | D | ED | benign            |
| rs3795375 | NP_115811 | V | I | VI | benign            |
| rs3795393 | NP_002953 | D | G | DG | benign            |
| rs3795424 | NP_110413 | E | A | EA | possibly damaging |
| rs3795498 | NP_114406 | A | T | AT | benign            |
| rs3795504 | XP_046531 | L | F | LF | benign            |
| rs3795535 | NP_060368 | G | S | GS | benign            |
| rs3795564 | XP_046808 | T | M | TM | benign            |
| rs3795594 | NP_004758 | P | A | PA | benign            |
| rs3795595 | NP_004758 | G | D | GD | benign            |
| rs3795605 | XP_043739 | A | T | AT | benign            |
| rs3795634 | NP_112596 | I | V | IV | benign            |
| rs3795686 | NP_073615 | S | N | SN | benign            |
| rs3795737 | NP_112242 | N | S | NS | benign            |
| rs3795832 | NP_056165 | R | H | RH | benign            |
| rs3795842 | NP_705834 | M | T | MT | benign            |

|           |           |   |   |    |                   |
|-----------|-----------|---|---|----|-------------------|
| rs3795875 | NP_006207 | I | M | IM | benign            |
| rs3795958 | NP_659475 | K | E | KE | benign            |
| rs3795969 | NP_689600 | C | S | CS | benign            |
| rs3796021 | NP_064602 | P | L | PL | benign            |
| rs3796033 | NP_072174 | T | I | TI | benign            |
| rs3796093 | NP_872307 | T | A | TA | benign            |
| rs3796097 | NP_690005 | A | T | AT | benign            |
| rs3796110 | NP_115917 | G | R | GR | possibly damaging |
| rs3796118 | NP_057636 | D | V | DV | possibly damaging |
| rs3796118 | NP_060314 | D | V | DV | probably damaging |
| rs3796119 | NP_057636 | E | K | EK | benign            |
| rs3796119 | NP_060314 | E | K | EK | benign            |
| rs3796129 | NP_689830 | P | Q | PQ | benign            |
| rs3796130 | NP_000165 | A | T | AT | benign            |
| rs3796139 | XP_290351 | M | V | MV | probably damaging |
| rs3796164 | NP_444254 | V | A | VA | benign            |
| rs3796164 | NP_444255 | V | A | VA | benign            |
| rs3796164 | NP_444256 | V | A | VA | benign            |
| rs3796164 | NP_444257 | V | A | VA | benign            |
| rs3796164 | NP_444253 | V | A | VA | benign            |
| rs3796185 | XP_047357 | V | A | VA | benign            |
| rs3796191 | NP_036322 | L | P | LP | benign            |
| rs3796191 | NP_658989 | L | P | LP | benign            |
| rs3796241 | NP_777367 | K | I | KI | possibly damaging |
| rs3796277 | NP_659474 | T | I | TI | possibly damaging |
| rs3796360 | XP_291085 | V | M | VM | benign            |
| rs3796375 | NP_078789 | A | V | AV | benign            |
| rs3796381 | NP_891550 | E | Q | EQ | benign            |
| rs3796504 | NP_003028 | P | T | PT | probably damaging |
| rs3796508 | NP_006059 | V | M | VM | benign            |
| rs3796529 | NP_005603 | P | L | PL | benign            |
| rs3796543 | NP_861522 | K | R | KR | benign            |
| rs3796544 | NP_861522 | A | V | AV | benign            |
| rs3796545 | NP_861522 | V | I | VI | benign            |
| rs3796546 | XP_044178 | R | Q | RQ | benign            |
| rs3796547 | XP_044178 | S | L | SL | benign            |
| rs3796622 | NP_998778 | Q | R | QR | benign            |
| rs3796623 | NP_998778 | G | S | GS | benign            |
| rs3796703 | NP_114095 | P | L | PL | probably damaging |
| rs3796704 | NP_114095 | R | Q | RQ | benign            |
| rs3796705 | NP_114095 | D | G | DG | possibly damaging |
| rs3796706 | NP_149113 | K | Q | KQ | benign            |
| rs3797036 | NP_057295 | N | K | NK | benign            |
| rs3797036 | NP_055748 | N | K | NK | benign            |
| rs3797055 | NP_115796 | E | K | EK | benign            |
| rs3797055 | NP_002578 | E | K | EK | benign            |



|           |           |   |   |    |                   |
|-----------|-----------|---|---|----|-------------------|
| rs3797713 | NP_060255 | H | Y | HY | possibly damaging |
| rs3797799 | NP_005566 | S | P | SP | possibly damaging |
| rs3797902 | NP_115665 | R | M | RM | benign            |
| rs3797903 | NP_115665 | G | E | GE | possibly damaging |
| rs3799268 | NP_003634 | D | N | DN | benign            |
| rs3799277 | XP_166443 | T | A | TA | benign            |
| rs3799831 | NP_055269 | N | I | NI | probably damaging |
| rs3800294 | XP_166453 | G | A | GA | benign            |
| rs3800297 | XP_166453 | K | R | KR | benign            |
| rs3800298 | XP_166453 | L | S | LS | benign            |
| rs3800324 | NP_115896 | G | E | GE | possibly damaging |
| rs3800325 | NP_115896 | Q | E | QE | benign            |
| rs3800326 | NP_115896 | P | L | PL | probably damaging |
| rs3800381 | NP_689966 | S | L | SL | possibly damaging |
| rs3800544 | NP_872358 | R | H | RH | possibly damaging |
| rs3800567 | XP_379520 | P | L | PL | probably damaging |
| rs3800791 | NP_543147 | R | C | RC | possibly damaging |
| rs3800821 | XP_380121 | Q | H | QH | benign            |
| rs3800822 | XP_380121 | T | A | TA | benign            |
| rs3800823 | XP_380121 | Q | K | QK | benign            |
| rs3800824 | XP_380121 | G | R | GR | possibly damaging |
| rs3800855 | NP_570857 | S | T | ST | benign            |
| rs3800855 | NP_570858 | S | T | ST | benign            |
| rs3800855 | NP_002838 | S | T | ST | benign            |
| rs3800939 | NP_005815 | K | E | KE | benign            |
| rs3800952 | NP_078913 | R | Q | RQ | benign            |
| rs3800962 | NP_787082 | E | D | ED | benign            |
| rs3801048 | XP_376567 | E | Q | EQ | benign            |
| rs3801237 | NP_112557 | R | H | RH | possibly damaging |
| rs3801237 | NP_003709 | R | H | RH | possibly damaging |
| rs3801295 | NP_055731 | D | N | DN | benign            |
| rs3801979 | NP_733787 | E | D | ED | benign            |
| rs3802146 | NP_076418 | G | S | GS | benign            |
| rs3802163 | NP_038460 | H | Y | HY | possibly damaging |
| rs3802204 | NP_110415 | D | G | DG | possibly damaging |
| rs3802205 | NP_110415 | V | A | VA | benign            |
| rs3802264 | NP_055758 | G | S | GS | possibly damaging |
| rs3802384 | NP_149077 | V | I | VI | benign            |
| rs3802415 | XP_497021 | L | H | LH | probably damaging |
| rs3802490 | NP_149040 | H | P | HP | benign            |
| rs3802526 | NP_116233 | P | A | PA | possibly damaging |
| rs3802707 | NP_071407 | F | V | FV | benign            |
| rs3802711 | NP_071407 | R | Q | RQ | benign            |
| rs3802757 | NP_689525 | H | Q | HQ | benign            |
| rs3802771 | XP_374922 | E | K | EK | benign            |
| rs3802773 | XP_374922 | G | E | GE | possibly damaging |

|           |           |   |   |    |                   |
|-----------|-----------|---|---|----|-------------------|
| rs3802774 | XP_374922 | L | R | LR | benign            |
| rs3802799 | NP_660093 | E | D | ED | benign            |
| rs3802799 | NP_892009 | E | D | ED | benign            |
| rs3802800 | NP_660093 | P | A | PA | possibly damaging |
| rs3802800 | NP_892009 | P | A | PA | possibly damaging |
| rs3802813 | NP_683708 | S | N | SN | benign            |
| rs3802813 | NP_443119 | S | N | SN | benign            |
| rs3802959 | XP_495876 | Q | R | QR | benign            |
| rs3802989 | NP_115885 | R | C | RC | possibly damaging |
| rs3802998 | NP_115721 | E | Q | EQ | benign            |
| rs3803002 | NP_982270 | V | M | VM | benign            |
| rs3803002 | NP_062570 | V | M | VM | benign            |
| rs3803002 | NP_982269 | V | M | VM | benign            |
| rs3803036 | NP_570897 | R | K | RK | benign            |
| rs3803185 | NP_612459 | C | R | CR | probably damaging |
| rs3803295 | NP_620145 | V | M | VM | benign            |
| rs3803311 | NP_071934 | T | M | TM | benign            |
| rs3803339 | NP_005648 | I | V | IV | benign            |
| rs3803347 | XP_031689 | R | H | RH | benign            |
| rs3803348 | XP_031689 | T | A | TA | benign            |
| rs3803357 | NP_055767 | K | Q | KQ | benign            |
| rs3803403 | NP_065829 | T | S | TS | benign            |
| rs3803405 | NP_065829 | G | E | GE | possibly damaging |
| rs3803412 | NP_588616 | D | G | DG | benign            |
| rs3803414 | NP_115821 | F | L | FL | benign            |
| rs3803430 | NP_000684 | M | V | MV | benign            |
| rs3803460 | NP_073752 | V | L | VL | benign            |
| rs3803466 | NP_006706 | V | I | VI | benign            |
| rs3803467 | NP_006706 | V | M | VM | benign            |
| rs3803530 | NP_940927 | S | I | SI | benign            |
| rs3803568 | NP_068591 | R | Q | RQ | benign            |
| rs3803641 | NP_597997 | P | S | PS | probably damaging |
| rs3803641 | NP_758857 | P | S | PS | probably damaging |
| rs3803646 | NP_036345 | C | G | CG | probably damaging |
| rs3803650 | NP_115554 | D | G | DG | possibly damaging |
| rs3803703 | NP_001275 | S | N | SN | benign            |
| rs3803704 | NP_060818 | N | S | NS | benign            |
| rs3803716 | NP_055309 | P | S | PS | benign            |
| rs3803728 | XP_496245 | R | W | RW | probably damaging |
| rs3803739 | NP_071349 | S | G | SG | benign            |
| rs3803752 | XP_064190 | S | N | SN | benign            |
| rs3803763 | NP_109590 | G | A | GA | benign            |
| rs3803764 | XP_045581 | R | W | RW | possibly damaging |
| rs3803784 | NP_060198 | A | T | AT | benign            |
| rs3803799 | NP_003800 | R | Q | RQ | benign            |
| rs3803800 | NP_742084 | N | S | NS | benign            |

|           |           |   |   |    |                   |
|-----------|-----------|---|---|----|-------------------|
| rs3803800 | NP_742085 | N | S | NS | benign            |
| rs3803800 | NP_003799 | N | S | NS | benign            |
| rs3803800 | NP_742086 | N | S | NS | benign            |
| rs3803824 | NP_115948 | V | A | VA | benign            |
| rs3803860 | NP_689483 | Y | C | YC | probably damaging |
| rs3803981 | NP_061866 | S | T | ST | benign            |
| rs3804007 | NP_981950 | S | Y | SY | benign            |
| rs3804010 | NP_853652 | S | R | SR | benign            |
| rs3804076 | NP_066306 | M | T | MT | probably damaging |
| rs3804083 | NP_110385 | P | T | PT | benign            |
| rs3804097 | NP_113676 | I | V | IV | benign            |
| rs3804505 | NP_060570 | R | H | RH | benign            |
| rs3804506 | NP_060570 | R | W | RW | possibly damaging |
| rs3804583 | NP_064627 | L | M | LM | benign            |
| rs3804769 | NP_004724 | D | G | DG | benign            |
| rs3805118 | NP_002649 | R | L | RL | possibly damaging |
| rs3805466 | NP_061165 | S | L | SL | possibly damaging |
| rs3806339 | NP_443174 | T | M | TM | possibly damaging |
| rs3806633 | NP_065729 | E | K | EK | benign            |
| rs3806873 | XP_029101 | T | A | TA | benign            |
| rs3806874 | XP_029101 | G | D | GD | possibly damaging |
| rs3806995 | NP_067547 | L | I | LI | benign            |
| rs3807068 | NP_078774 | K | N | KN | benign            |
| rs3807069 | NP_078774 | C | Y | CY | possibly damaging |
| rs3807153 | NP_570856 | M | T | MT | benign            |
| rs3807590 | NP_073585 | E | K | EK | benign            |
| rs3808536 | XP_114618 | R | K | RK | benign            |
| rs3808553 | NP_003497 | M | L | ML | benign            |
| rs3809019 | NP_071405 | T | I | TI | benign            |
| rs3809045 | NP_733840 | R | L | RL | possibly damaging |
| rs3809045 | NP_078894 | R | L | RL | possibly damaging |
| rs3809199 | NP_085143 | V | M | VM | benign            |
| rs3809273 | NP_653272 | G | R | GR | benign            |
| rs3809371 | NP_116202 | V | M | VM | benign            |
| rs3809429 | NP_115511 | Q | H | QH | benign            |
| rs3809482 | NP_689668 | R | G | RG | benign            |
| rs3809529 | NP_149972 | P | L | PL | probably damaging |
| rs3809530 | NP_149972 | V | M | VM | benign            |
| rs3809553 | NP_078887 | E | Q | EQ | benign            |
| rs3809611 | NP_115645 | L | P | LP | probably damaging |
| rs3809683 | NP_078951 | I | V | IV | benign            |
| rs3809718 | NP_848613 | A | V | AV | benign            |
| rs3809727 | NP_113644 | G | A | GA | possibly damaging |
| rs3809806 | NP_114171 | A | V | AV | benign            |
| rs3809813 | NP_115818 | Q | H | QH | possibly damaging |
| rs3809835 | NP_112497 | A | T | AT | benign            |

|           |           |   |   |    |                   |
|-----------|-----------|---|---|----|-------------------|
| rs3809849 | NP_055335 | Q | E | QE | benign            |
| rs3809870 | NP_689561 | M | V | MV | possibly damaging |
| rs3809875 | NP_443160 | P | R | PR | probably damaging |
| rs3809917 | NP_064617 | G | S | GS | benign            |
| rs3809970 | NP_443179 | G | S | GS | benign            |
| rs3809972 | NP_443179 | R | T | RT | benign            |
| rs3809973 | NP_443179 | K | N | KN | benign            |
| rs3809974 | NP_443179 | S | L | SL | benign            |
| rs3809975 | NP_443179 | S | T | ST | benign            |
| rs3809976 | NP_443179 | V | L | VL | benign            |
| rs3809977 | NP_443179 | P | H | PH | probably damaging |
| rs3809982 | NP_443179 | P | S | PS | benign            |
| rs3809983 | NP_443179 | A | S | AS | benign            |
| rs3809984 | NP_443179 | R | S | RS | benign            |
| rs3810130 | NP_689688 | A | E | AE | benign            |
| rs3810130 | NP_116217 | E | A | EA | possibly damaging |
| rs3810144 | NP_940880 | V | L | VL | benign            |
| rs3810150 | NP_597701 | P | L | PL | probably damaging |
| rs3810151 | NP_597701 | V | A | VA | benign            |
| rs3810201 | NP_659483 | A | T | AT | benign            |
| rs3810206 | NP_598399 | A | V | AV | benign            |
| rs3810206 | NP_116009 | A | V | AV | benign            |
| rs3810343 | NP_056952 | A | V | AV | benign            |
| rs3810343 | NP_055326 | V | A | VA | benign            |
| rs3810481 | NP_208384 | T | M | TM | possibly damaging |
| rs3810483 | NP_208384 | Q | E | QE | benign            |
| rs3810485 | NP_208384 | P | L | PL | probably damaging |
| rs3810486 | NP_208384 | L | R | LR | benign            |
| rs3810487 | NP_208384 | R | K | RK | benign            |
| rs3810510 | NP_065166 | A | T | AT | benign            |
| rs3810537 | XP_030559 | D | G | DG | probably damaging |
| rs3810548 | NP_005551 | M | T | MT | benign            |
| rs3810553 | NP_543023 | D | N | DN | benign            |
| rs3810574 | NP_071927 | N | S | NS | benign            |
| rs3810651 | NP_061028 | I | F | IF | benign            |
| rs3810655 | NP_443158 | N | H | NH | benign            |
| rs3810710 | NP_000275 | M | L | ML | probably damaging |
| rs3810713 | XP_210062 | S | T | ST | benign            |
| rs3810813 | NP_115820 | S | F | SF | benign            |
| rs3810818 | NP_612449 | A | E | AE | benign            |
| rs3810950 | NP_065574 | A | T | AT | benign            |
| rs3810950 | NP_066266 | A | T | AT | benign            |
| rs3810950 | NP_066265 | A | T | AT | benign            |
| rs3810950 | NP_066264 | A | T | AT | benign            |
| rs3810960 | NP_001100 | P | L | PL | benign            |
| rs3810964 | NP_689856 | E | G | EG | possibly damaging |

|           |           |   |   |    |                   |
|-----------|-----------|---|---|----|-------------------|
| rs3810964 | NP_208383 | E | G | EG | possibly damaging |
| rs3811039 | NP_689728 | E | D | ED | benign            |
| rs3811040 | NP_689728 | L | S | LS | benign            |
| rs3811046 | NP_775296 | G | V | GV | benign            |
| rs3811046 | NP_055254 | G | V | GV | benign            |
| rs3811047 | NP_775296 | T | A | TA | benign            |
| rs3811047 | NP_055254 | T | A | TA | benign            |
| rs3811069 | NP_006572 | A | T | AT | benign            |
| rs3811102 | NP_115521 | H | Q | HQ | benign            |
| rs3811103 | NP_115521 | S | P | SP | possibly damaging |
| rs3811182 | NP_055792 | I | M | IM | benign            |
| rs3811188 | NP_851312 | G | V | GV | probably damaging |
| rs3811188 | NP_851313 | G | V | GV | probably damaging |
| rs3811188 | NP_851824 | G | V | GV | probably damaging |
| rs3811188 | NP_848026 | G | V | GV | probably damaging |
| rs3811348 | NP_054781 | R | Q | RQ | benign            |
| rs3811363 | NP_077311 | R | Q | RQ | benign            |
| rs3811381 | NP_000642 | R | P | RP | benign            |
| rs3811381 | NP_000564 | P | R | PR | possibly damaging |
| rs3811428 | NP_443166 | V | M | VM | benign            |
| rs3811428 | NP_599152 | V | M | VM | benign            |
| rs3811444 | NP_056246 | T | M | TM | benign            |
| rs3811473 | XP_375851 | V | G | VG | benign            |
| rs3811474 | XP_375851 | K | E | KE | benign            |
| rs3811514 | XP_051221 | K | E | KE | benign            |
| rs3811515 | XP_051221 | H | Q | HQ | benign            |
| rs3811553 | NP_878915 | R | W | RW | possibly damaging |
| rs3811553 | NP_079520 | R | W | RW | possibly damaging |
| rs3811635 | NP_006334 | I | V | IV | benign            |
| rs3811679 | XP_114301 | I | T | IT | benign            |
| rs3811740 | NP_055079 | T | S | TS | benign            |
| rs3811750 | NP_115512 | R | Q | RQ | possibly damaging |
| rs3811765 | XP_496704 | A | T | AT | benign            |
| rs3811833 | XP_034262 | R | C | RC | possibly damaging |
| rs3811987 | NP_057675 | P | S | PS | possibly damaging |
| rs3811993 | NP_000802 | T | M | TM | benign            |
| rs3812030 | NP_115976 | M | K | MK | benign            |
| rs3812031 | NP_115976 | D | V | DV | probably damaging |
| rs3812054 | NP_115822 | V | I | VI | benign            |
| rs3812082 | XP_038920 | R | Q | RQ | benign            |
| rs3812086 | NP_071916 | S | N | SN | benign            |
| rs3812131 | XP_048070 | I | S | IS | benign            |
| rs3812138 | NP_002517 | T | A | TA | benign            |
| rs3812153 | NP_073563 | M | V | MV | benign            |
| rs3812315 | NP_116570 | D | N | DN | benign            |
| rs3812315 | NP_116571 | D | N | DN | benign            |

|           |           |   |   |    |                   |
|-----------|-----------|---|---|----|-------------------|
| rs3812315 | NP_116572 | D | N | DN | benign            |
| rs3812315 | NP_127461 | D | N | DN | benign            |
| rs3812315 | NP_116569 | D | N | DN | benign            |
| rs3812316 | NP_116570 | Q | H | QH | benign            |
| rs3812316 | NP_116571 | Q | H | QH | benign            |
| rs3812316 | NP_116572 | Q | H | QH | benign            |
| rs3812316 | NP_127461 | Q | H | QH | benign            |
| rs3812316 | NP_116569 | Q | H | QH | benign            |
| rs3812404 | XP_377995 | T | A | TA | benign            |
| rs3812405 | XP_377995 | R | C | RC | possibly damaging |
| rs3812408 | NP_005223 | A | T | AT | benign            |
| rs3812447 | NP_115754 | A | V | AV | benign            |
| rs3812475 | NP_060426 | W | R | WR | benign            |
| rs3812499 | NP_689499 | P | L | PL | probably damaging |
| rs3812577 | NP_006634 | R | Q | RQ | benign            |
| rs3812582 | XP_498426 | D | N | DN | benign            |
| rs3812583 | XP_498426 | G | A | GA | benign            |
| rs3812594 | XP_088459 | R | C | RC | possibly damaging |
| rs3812597 | NP_060087 | A | S | AS | benign            |
| rs3812619 | NP_009196 | R | Q | RQ | benign            |
| rs3812629 | NP_079151 | P | L | PL | probably damaging |
| rs3812645 | XP_043613 | M | V | MV | possibly damaging |
| rs3812762 | NP_005409 | D | E | DE | benign            |
| rs3812762 | NP_998783 | D | E | DE | benign            |
| rs3812813 | NP_115523 | A | T | AT | benign            |
| rs3812871 | NP_073754 | M | V | MV | benign            |
| rs3812874 | NP_073754 | S | R | SR | benign            |
| rs3812882 | NP_065802 | A | T | AT | benign            |
| rs3812883 | NP_065802 | C | S | CS | probably damaging |
| rs3813012 | NP_660151 | G | D | GD | possibly damaging |
| rs3813020 | NP_787097 | H | Y | HY | benign            |
| rs3813049 | NP_114165 | P | L | PL | probably damaging |
| rs3813050 | NP_114165 | I | T | IT | benign            |
| rs3813135 | NP_443122 | T | A | TA | benign            |
| rs3813173 | NP_116751 | P | L | PL | probably damaging |
| rs3813173 | NP_116750 | P | L | PL | probably damaging |
| rs3813174 | NP_116751 | G | R | GR | possibly damaging |
| rs3813174 | NP_116750 | G | R | GR | possibly damaging |
| rs3813188 | XP_372195 | T | N | TN | benign            |
| rs3813526 | XP_035497 | S | P | SP | benign            |
| rs3813535 | NP_149095 | S | P | SP | benign            |
| rs3813536 | NP_149095 | R | H | RH | benign            |
| rs3813593 | NP_037371 | A | T | AT | benign            |
| rs3813609 | NP_859071 | V | L | VL | benign            |
| rs3813616 | NP_057656 | R | H | RH | benign            |
| rs3813616 | NP_036607 | R | H | RH | benign            |

|           |           |   |   |    |                   |
|-----------|-----------|---|---|----|-------------------|
| rs3813636 | NP_115502 | L | R | LR | benign            |
| rs3813671 | NP_004376 | T | A | TA | benign            |
| rs3813744 | NP_005760 | H | Q | HQ | possibly damaging |
| rs3813758 | NP_071445 | R | C | RC | benign            |
| rs3813768 | NP_057197 | G | A | GA | benign            |
| rs3813773 | NP_115823 | G | A | GA | benign            |
| rs3813795 | NP_116261 | Q | R | QR | benign            |
| rs3813832 | NP_588611 | H | R | HR | benign            |
| rs3813891 | XP_029805 | R | H | RH | possibly damaging |
| rs3813907 | NP_612392 | I | M | IM | benign            |
| rs3813922 | NP_848560 | P | H | PH | probably damaging |
| rs3814160 | NP_694579 | P | S | PS | possibly damaging |
| rs3814165 | XP_167709 | P | S | PS | benign            |
| rs3814166 | XP_167709 | G | S | GS | possibly damaging |
| rs3814171 | NP_006405 | I | V | IV | benign            |
| rs3814171 | NP_892117 | I | V | IV | benign            |
| rs3814182 | NP_115967 | R | S | RS | possibly damaging |
| rs3814193 | XP_495796 | R | W | RW | possibly damaging |
| rs3814196 | XP_374765 | V | M | VM | benign            |
| rs3814211 | NP_056428 | S | G | SG | benign            |
| rs3814226 | XP_495847 | R | Q | RQ | benign            |
| rs3814228 | XP_495847 | N | H | NH | benign            |
| rs3814278 | XP_041162 | E | K | EK | benign            |
| rs3814281 | XP_058720 | R | H | RH | benign            |
| rs3814290 | NP_870998 | D | N | DN | benign            |
| rs3814291 | NP_112219 | R | Q | RQ | benign            |
| rs3814299 | XP_378901 | S | L | SL | probably damaging |
| rs3814300 | XP_378901 | D | N | DN | possibly damaging |
| rs3814301 | NP_057274 | T | I | TI | benign            |
| rs3814400 | NP_150279 | G | R | GR | possibly damaging |
| rs3814404 | NP_150279 | P | S | PS | benign            |
| rs3814405 | NP_150279 | Q | H | QH | benign            |
| rs3814416 | XP_291111 | V | G | VG | benign            |
| rs3814422 | NP_079225 | H | D | HD | benign            |
| rs3814519 | NP_002188 | A | D | AD | benign            |
| rs3814596 | NP_055704 | F | S | FS | probably damaging |
| rs3814621 | NP_055568 | S | P | SP | benign            |
| rs3814741 | NP_004283 | A | S | AS | benign            |
| rs3814762 | NP_113621 | V | M | VM | benign            |
| rs3814839 | XP_029353 | S | C | SC | benign            |
| rs3814848 | NP_071337 | G | R | GR | possibly damaging |
| rs3814874 | XP_027237 | V | I | VI | benign            |
| rs3814882 | NP_057235 | R | W | RW | possibly damaging |
| rs3814995 | NP_004637 | E | K | EK | benign            |
| rs3815045 | NP_037533 | H | Y | HY | benign            |
| rs3815308 | NP_115871 | G | S | GS | benign            |

|           |           |   |   |    |                   |
|-----------|-----------|---|---|----|-------------------|
| rs3815354 | NP_003635 | D | H | DH | possibly damaging |
| rs3815354 | NP_958836 | D | H | DH | possibly damaging |
| rs3815354 | NP_958839 | D | H | DH | possibly damaging |
| rs3815456 | NP_057170 | A | T | AT | benign            |
| rs3815460 | NP_851938 | S | C | SC | benign            |
| rs3815460 | NP_851937 | S | C | SC | possibly damaging |
| rs3815655 | NP_057419 | P | S | PS | possibly damaging |
| rs3815682 | NP_085139 | A | S | AS | benign            |
| rs3815708 | NP_085079 | A | S | AS | benign            |
| rs3815708 | NP_000755 | A | S | AS | benign            |
| rs3815710 | NP_085079 | L | R | LR | benign            |
| rs3815710 | NP_000755 | L | R | LR | possibly damaging |
| rs3815711 | NP_085079 | A | V | AV | benign            |
| rs3815711 | NP_000755 | A | V | AV | benign            |
| rs3815768 | NP_036213 | T | A | TA | benign            |
| rs3815803 | XP_375358 | S | G | SG | benign            |
| rs3815823 | NP_059447 | R | Q | RQ | benign            |
| rs3815849 | NP_072174 | R | C | RC | possibly damaging |
| rs3815875 | NP_002340 | D | A | DA | benign            |
| rs3815905 | NP_775801 | V | M | VM | benign            |
| rs3816032 | NP_689479 | I | T | IT | benign            |
| rs3816045 | NP_036287 | R | H | RH | possibly damaging |
| rs3816162 | NP_071918 | I | T | IT | benign            |
| rs3816182 | NP_036337 | T | S | TS | benign            |
| rs3816183 | NP_036337 | V | I | VI | benign            |
| rs3816208 | NP_002989 | A | T | AT | benign            |
| rs3816281 | NP_002655 | N | K | NK | benign            |
| rs3816300 | NP_003172 | N | S | NS | benign            |
| rs3816421 | XP_295213 | A | T | AT | benign            |
| rs3816478 | NP_620714 | P | L | PL | possibly damaging |
| rs3816497 | NP_002931 | S | C | SC | probably damaging |
| rs3816527 | NP_002843 | D | A | DA | possibly damaging |
| rs3816533 | NP_005081 | R | C | RC | possibly damaging |
| rs3816539 | NP_995583 | V | M | VM | benign            |
| rs3816539 | NP_079163 | V | M | VM | benign            |
| rs3816540 | NP_002944 | K | T | KT | benign            |
| rs3816605 | XP_113678 | T | A | TA | benign            |
| rs3816614 | XP_035037 | R | Q | RQ | benign            |
| rs3816665 | NP_000417 | R | H | RH | benign            |
| rs3816747 | NP_079043 | T | I | TI | benign            |
| rs3816748 | NP_079043 | L | V | LV | benign            |
| rs3816780 | NP_079133 | P | S | PS | benign            |
| rs3816800 | NP_077816 | R | S | RS | benign            |
| rs3816842 | XP_371655 | T | I | TI | possibly damaging |
| rs3816873 | NP_000244 | I | T | IT | benign            |
| rs3816877 | NP_001631 | T | M | TM | benign            |



|           |           |   |   |    |                   |
|-----------|-----------|---|---|----|-------------------|
| rs3816887 | NP_073579 | D | H | DH | possibly damaging |
| rs3816988 | NP_055874 | F | L | FL | benign            |
| rs3817121 | XP_371617 | V | I | VI | benign            |
| rs3817190 | NP_006540 | T | S | TS | benign            |
| rs3817190 | NP_757365 | T | S | TS | benign            |
| rs3817190 | NP_705720 | T | S | TS | benign            |
| rs3817190 | NP_757380 | T | S | TS | benign            |
| rs3817190 | NP_757364 | T | S | TS | benign            |
| rs3817190 | NP_757363 | T | S | TS | benign            |
| rs3817211 | NP_060028 | N | D | ND | benign            |
| rs3817220 | NP_115287 | I | V | IV | benign            |
| rs3817220 | NP_115288 | I | V | IV | benign            |
| rs3817220 | NP_115286 | I | V | IV | benign            |
| rs3817221 | NP_115287 | R | Q | RQ | benign            |
| rs3817221 | NP_115288 | R | Q | RQ | benign            |
| rs3817221 | NP_115286 | R | Q | RQ | benign            |
| rs3817222 | NP_115287 | R | W | RW | possibly damaging |
| rs3817222 | NP_115288 | R | W | RW | possibly damaging |
| rs3817222 | NP_115286 | R | W | RW | probably damaging |
| rs3817224 | NP_115287 | T | S | TS | benign            |
| rs3817224 | NP_115288 | T | S | TS | benign            |
| rs3817224 | NP_115286 | T | S | TS | benign            |
| rs3817271 | XP_496032 | F | L | FL | benign            |
| rs3817362 | NP_077006 | V | A | VA | benign            |
| rs3817405 | NP_116201 | V | I | VI | benign            |
| rs3817420 | NP_059129 | V | I | VI | benign            |
| rs3817552 | NP_002456 | H | Q | HQ | probably damaging |
| rs3817552 | NP_996557 | H | Q | HQ | probably damaging |
| rs3817552 | NP_996555 | H | Q | HQ | probably damaging |
| rs3817552 | NP_996556 | H | Q | HQ | probably damaging |
| rs3817672 | NP_003225 | S | G | SG | benign            |
| rs3817893 | NP_115597 | H | Q | HQ | benign            |
| rs3817910 | NP_113663 | Y | C | YC | probably damaging |
| rs3817911 | NP_113663 | R | H | RH | benign            |
| rs3817914 | NP_113663 | D | E | DE | benign            |
| rs3817920 | NP_113663 | H | Y | HY | benign            |
| rs3817921 | NP_113663 | P | A | PA | possibly damaging |
| rs3818123 | NP_061914 | Q | R | QR | benign            |
| rs3818125 | NP_061914 | A | T | AT | benign            |
| rs3818199 | NP_002853 | A | S | AS | benign            |
| rs3818222 | NP_848561 | V | I | VI | benign            |
| rs3818503 | NP_937829 | R | H | RH | benign            |
| rs3818503 | NP_937830 | R | H | RH | benign            |
| rs3818503 | NP_054729 | R | H | RH | benign            |
| rs3818511 | NP_005530 | K | R | KR | benign            |
| rs3818551 | NP_115906 | P | Q | PQ | benign            |

|           |           |   |   |    |                   |
|-----------|-----------|---|---|----|-------------------|
| rs3818562 | NP_078802 | H | Y | HY | benign            |
| rs3818562 | NP_573444 | H | Y | HY | benign            |
| rs3818562 | NP_620641 | H | Y | HY | benign            |
| rs3818872 | NP_009190 | R | Q | RQ | possibly damaging |
| rs3818949 | XP_375853 | N | D | ND | benign            |
| rs3819129 | NP_775800 | G | D | GD | possibly damaging |
| rs3819142 | NP_775839 | N | H | NH | benign            |
| rs3819158 | NP_071398 | V | I | VI | benign            |
| rs3819234 | XP_495883 | P | S | PS | possibly damaging |
| rs3819236 | XP_495883 | M | T | MT | benign            |
| rs3819237 | XP_495883 | M | L | ML | possibly damaging |
| rs3819238 | XP_495883 | T | K | TK | benign            |
| rs3819330 | NP_001447 | K | R | KR | benign            |
| rs3819946 | NP_001880 | I | V | IV | benign            |
| rs3820011 | XP_372193 | G | C | GC | probably damaging |
| rs3820059 | NP_067002 | F | S | FS | benign            |
| rs3820071 | NP_056933 | R | G | RG | benign            |
| rs3820198 | NP_059992 | E | D | ED | benign            |
| rs3820198 | NP_150643 | E | D | ED | benign            |
| rs3820198 | NP_004622 | E | D | ED | benign            |
| rs3820206 | NP_443128 | L | R | LR | possibly damaging |
| rs3820264 | NP_067028 | T | A | TA | probably damaging |
| rs3820285 | NP_005738 | G | A | GA | benign            |
| rs3820292 | NP_115640 | E | G | EG | benign            |
| rs3820293 | NP_115640 | F | C | FC | possibly damaging |
| rs3820386 | NP_067649 | A | T | AT | benign            |
| rs3820436 | NP_036266 | R | Q | RQ | benign            |
| rs3820439 | NP_064601 | V | I | VI | benign            |
| rs3820450 | NP_002146 | E | K | EK | benign            |
| rs3820464 | NP_009054 | R | Q | RQ | benign            |
| rs3820551 | NP_005364 | R | Q | RQ | benign            |
| rs3820602 | NP_005637 | T | I | TI | benign            |
| rs3820678 | XP_291548 | A | T | AT | benign            |
| rs3820921 | NP_057336 | R | T | RT | benign            |
| rs3821033 | XP_376172 | A | T | AT | benign            |
| rs3821169 | NP_057525 | G | V | GV | probably damaging |
| rs3821238 | NP_060880 | S | C | SC | benign            |
| rs3821242 | NP_061966 | W | R | WR | benign            |
| rs3821348 | NP_057636 | V | L | VL | benign            |
| rs3821348 | NP_060314 | V | L | VL | benign            |
| rs3821406 | XP_374057 | I | M | IM | benign            |
| rs3821507 | NP_008958 | P | L | PL | probably damaging |
| rs3821727 | NP_113607 | T | S | TS | benign            |
| rs3821750 | XP_291080 | I | T | IT | benign            |
| rs3821875 | NP_001398 | S | T | ST | benign            |
| rs3821917 | NP_055823 | R | Q | RQ | benign            |

|           |           |   |   |    |                   |
|-----------|-----------|---|---|----|-------------------|
| rs3821945 | NP_005996 | D | N | DN | benign            |
| rs3821979 | NP_065910 | L | H | LH | possibly damaging |
| rs3822214 | NP_000213 | M | L | ML | benign            |
| rs3822335 | NP_061756 | L | V | LV | benign            |
| rs3822346 | NP_113688 | P | S | PS | benign            |
| rs3822346 | NP_061730 | P | S | PS | benign            |
| rs3822351 | NP_113688 | G | R | GR | benign            |
| rs3822351 | NP_061730 | G | R | GR | benign            |
| rs3822352 | NP_113688 | R | H | RH | benign            |
| rs3822352 | NP_061730 | R | H | RH | benign            |
| rs3822354 | NP_113688 | G | S | GS | benign            |
| rs3822354 | NP_061730 | G | S | GS | benign            |
| rs3822357 | NP_115796 | A | T | AT | benign            |
| rs3822357 | NP_002578 | A | T | AT | benign            |
| rs3822453 | XP_016532 | M | K | MK | benign            |
| rs3822471 | NP_056199 | N | S | NS | benign            |
| rs3822471 | NP_597677 | N | S | NS | benign            |
| rs3822530 | NP_006624 | P | R | PR | probably damaging |
| rs3822587 | NP_057302 | I | V | IV | benign            |
| rs3822659 | NP_056053 | S | A | SA | benign            |
| rs3822660 | NP_056053 | M | I | MI | benign            |
| rs3823184 | NP_689764 | R | Q | RQ | possibly damaging |
| rs3823302 | NP_064570 | E | D | ED | benign            |
| rs3823310 | NP_005091 | E | D | ED | benign            |
| rs3823310 | NP_653080 | E | D | ED | benign            |
| rs3823430 | NP_001362 | V | I | VI | benign            |
| rs3823646 | NP_078913 | A | V | AV | benign            |
| rs3823844 | XP_371878 | Y | H | YH | benign            |
| rs3823846 | XP_376576 | Y | H | YH | benign            |
| rs3824004 | NP_006184 | R | S | RS | possibly damaging |
| rs3824145 | NP_055844 | S | L | SL | benign            |
| rs3824250 | NP_060494 | R | C | RC | probably damaging |
| rs3824276 | NP_006757 | L | S | LS | benign            |
| rs3824419 | NP_870987 | A | P | AP | benign            |
| rs3824420 | NP_694856 | R | H | RH | benign            |
| rs3824421 | NP_694856 | A | V | AV | benign            |
| rs3824428 | XP_498335 | G | S | GS | benign            |
| rs3824553 | NP_000146 | S | T | ST | benign            |
| rs3824699 | NP_059129 | I | V | IV | benign            |
| rs3824700 | NP_059129 | R | H | RH | probably damaging |
| rs3824733 | NP_005963 | R | C | RC | probably damaging |
| rs3824807 | NP_055476 | R | C | RC | possibly damaging |
| rs3824853 | NP_060105 | K | R | KR | benign            |
| rs3824874 | NP_057240 | K | T | KT | benign            |
| rs3824886 | NP_006401 | R | S | RS | benign            |
| rs3824940 | XP_370654 | E | V | EV | probably damaging |

|           |           |   |   |    |                   |
|-----------|-----------|---|---|----|-------------------|
| rs3825020 | XP_495876 | G | R | GR | benign            |
| rs3825145 | NP_006009 | F | S | FS | possibly damaging |
| rs3825149 | NP_006009 | Y | N | YN | possibly damaging |
| rs3825150 | NP_006009 | V | L | VL | benign            |
| rs3825155 | NP_006009 | C | R | CR | probably damaging |
| rs3825274 | XP_495912 | H | P | HP | possibly damaging |
| rs3825327 | NP_085911 | P | H | PH | possibly damaging |
| rs3825491 | XP_028522 | P | A | PA | benign            |
| rs3825549 | NP_473365 | S | P | SP | benign            |
| rs3825584 | NP_852002 | R | H | RH | benign            |
| rs3825584 | NP_079506 | R | H | RH | benign            |
| rs3825629 | NP_055906 | E | Q | EQ | benign            |
| rs3825630 | NP_115511 | P | L | PL | benign            |
| rs3825632 | NP_115511 | D | E | DE | benign            |
| rs3825676 | NP_008970 | G | R | GR | possibly damaging |
| rs3825723 | XP_375087 | Q | L | QL | possibly damaging |
| rs3825725 | XP_375087 | T | A | TA | benign            |
| rs3825801 | NP_061198 | E | K | EK | benign            |
| rs3825807 | NP_055087 | S | P | SP | benign            |
| rs3825828 | NP_055087 | D | N | DN | benign            |
| rs3825829 | NP_055087 | D | G | DG | benign            |
| rs3825830 | NP_055087 | P | L | PL | probably damaging |
| rs3825831 | NP_055087 | V | E | VE | benign            |
| rs3825833 | NP_055087 | Y | C | YC | probably damaging |
| rs3825859 | NP_079516 | G | R | GR | benign            |
| rs3825937 | NP_149972 | I | T | IT | benign            |
| rs3825942 | NP_005567 | G | D | GD | possibly damaging |
| rs3826007 | NP_004040 | G | D | GD | possibly damaging |
| rs3826016 | XP_370839 | I | T | IT | benign            |
| rs3826016 | XP_496096 | I | T | IT | benign            |
| rs3826107 | NP_036258 | T | M | TM | benign            |
| rs3826107 | NP_078809 | T | M | TM | possibly damaging |
| rs3826190 | NP_001257 | G | V | GV | probably damaging |
| rs3826192 | NP_001257 | V | I | VI | benign            |
| rs3826193 | NP_001257 | I | V | IV | benign            |
| rs3826358 | NP_000033 | V | A | VA | benign            |
| rs3826543 | XP_496182 | I | V | IV | benign            |
| rs3826550 | NP_000517 | A | T | AT | benign            |
| rs3826593 | NP_443179 | I | T | IT | benign            |
| rs3826616 | NP_942130 | H | R | HR | probably damaging |
| rs3826616 | NP_002631 | H | R | HR | probably damaging |
| rs3826671 | NP_689688 | H | R | HR | benign            |
| rs3826671 | NP_116217 | R | H | RH | benign            |
| rs3826709 | NP_835388 | E | Q | EQ | benign            |
| rs3826709 | NP_075384 | E | Q | EQ | benign            |
| rs3826711 | NP_000758 | P | A | PA | probably damaging |

|           |           |   |   |    |                   |
|-----------|-----------|---|---|----|-------------------|
| rs3826736 | NP_940936 | Y | N | YN | possibly damaging |
| rs3826750 | NP_006855 | N | S | NS | benign            |
| rs3826835 | NP_115631 | T | S | TS | benign            |
| rs3826838 | NP_000502 | V | I | VI | benign            |
| rs3826936 | NP_003766 | A | S | AS | benign            |
| rs3826942 | NP_116242 | G | R | GR | probably damaging |
| rs3826979 | XP_290835 | P | L | PL | probably damaging |
| rs3827022 | NP_208384 | R | Q | RQ | benign            |
| rs3827040 | NP_542175 | P | L | PL | probably damaging |
| rs3827047 | NP_898868 | E | D | ED | benign            |
| rs3827047 | NP_898869 | E | D | ED | benign            |
| rs3827047 | NP_036540 | E | D | ED | benign            |
| rs3827103 | NP_063941 | V | I | VI | benign            |
| rs3827183 | NP_005119 | G | E | GE | benign            |
| rs3827318 | NP_057533 | I | T | IT | benign            |
| rs3827440 | NP_115942 | S | P | SP | benign            |
| rs3827462 | NP_000100 | T | S | TS | benign            |
| rs3827462 | NP_003997 | T | S | TS | benign            |
| rs3827462 | NP_003998 | T | S | TS | benign            |
| rs3827462 | NP_004000 | T | S | TS | benign            |
| rs3827462 | NP_004001 | T | S | TS | benign            |
| rs3827464 | NP_078933 | R | C | RC | possibly damaging |
| rs3827497 | NP_056011 | Y | H | YH | possibly damaging |
| rs3827521 | XP_208658 | T | K | TK | possibly damaging |
| rs3827522 | NP_694571 | P | S | PS | possibly damaging |
| rs3827530 | NP_115820 | A | V | AV | benign            |
| rs3827653 | NP_066974 | R | H | RH | possibly damaging |
| rs3827760 | NP_071731 | V | A | VA | benign            |
| rs3827816 | NP_002151 | V | I | VI | benign            |
| rs3827906 | NP_071755 | L | V | LV | benign            |
| rs3828049 | NP_056473 | A | V | AV | benign            |
| rs3828050 | NP_056473 | R | H | RH | possibly damaging |
| rs3828054 | NP_064512 | Q | R | QR | benign            |
| rs3828075 | NP_078613 | A | T | AT | benign            |
| rs3828161 | XP_051221 | Q | R | QR | benign            |
| rs3828341 | NP_758515 | Q | H | QH | benign            |
| rs3828341 | NP_006864 | Q | H | QH | benign            |
| rs3828357 | XP_114301 | N | D | ND | benign            |
| rs3828405 | NP_689886 | D | A | DA | possibly damaging |
| rs3828406 | NP_689886 | A | T | AT | benign            |
| rs3828407 | NP_689886 | M | T | MT | benign            |
| rs3828408 | NP_689886 | P | L | PL | benign            |
| rs3828539 | NP_619643 | I | T | IT | benign            |
| rs3828555 | NP_006672 | A | E | AE | benign            |
| rs3828611 | NP_705838 | H | Q | HQ | benign            |
| rs3828625 | NP_036320 | N | S | NS | benign            |

|           |           |   |   |    |                   |
|-----------|-----------|---|---|----|-------------------|
| rs3828625 | NP_658982 | N | S | NS | benign            |
| rs3828736 | NP_000417 | A | T | AT | benign            |
| rs3828741 | NP_000856 | A | T | AT | benign            |
| rs3828743 | XP_371844 | P | S | PS | possibly damaging |
| rs3828855 | NP_004044 | P | S | PS | benign            |
| rs3829009 | NP_689775 | R | S | RS | benign            |
| rs3829037 | NP_055566 | T | A | TA | benign            |
| rs3829078 | NP_001207 | Q | R | QR | benign            |
| rs3829125 | NP_001809 | S | C | SC | probably damaging |
| rs3829241 | NP_620714 | E | G | EG | possibly damaging |
| rs3829256 | NP_059509 | E | A | EA | benign            |
| rs3829295 | NP_976328 | M | V | MV | benign            |
| rs3829409 | NP_068763 | A | V | AV | benign            |
| rs3829452 | NP_003804 | G | A | GA | possibly damaging |
| rs3829456 | NP_003804 | Q | K | QK | benign            |
| rs3829462 | NP_000227 | L | F | LF | probably damaging |
| rs3829598 | NP_114165 | R | C | RC | probably damaging |
| rs3829658 | NP_201586 | T | M | TM | benign            |
| rs3829658 | NP_443729 | T | M | TM | benign            |
| rs3829659 | NP_055257 | R | G | RG | probably damaging |
| rs3829701 | NP_848699 | L | P | LP | probably damaging |
| rs3829701 | NP_653311 | L | P | LP | probably damaging |
| rs3829706 | NP_078928 | M | V | MV | benign            |
| rs3829709 | NP_002556 | S | A | SA | benign            |
| rs3829738 | NP_115505 | S | P | SP | benign            |
| rs3829740 | NP_115505 | P | R | PR | benign            |
| rs3829752 | NP_689488 | E | Q | EQ | benign            |
| rs3829817 | NP_115823 | R | Q | RQ | benign            |
| rs3829827 | XP_029805 | C | Y | CY | probably damaging |
| rs3829856 | NP_056467 | I | L | IL | benign            |
| rs3829868 | NP_057274 | G | S | GS | benign            |
| rs3829873 | XP_372191 | Q | R | QR | benign            |
| rs3829891 | XP_027658 | T | K | TK | benign            |
| rs3829986 | NP_005202 | V | M | VM | benign            |
| rs3830014 | NP_000186 | R | W | RW | probably damaging |
| rs3830125 | NP_002115 | A | T | AT | benign            |
| rs3831042 | XP_496691 | S | A | SA | benign            |
| rs3842776 | NP_071424 | G | A | GA | benign            |
| rs3842778 | NP_071424 | Q | R | QR | benign            |
| rs3842779 | NP_071424 | A | T | AT | benign            |
| rs3842780 | NP_071424 | N | K | NK | benign            |
| rs3842789 | NP_000953 | R | H | RH | benign            |
| rs3842789 | NP_542158 | R | H | RH | benign            |
| rs3842792 | NP_000953 | K | T | KT | benign            |
| rs3842792 | NP_542158 | K | T | KT | benign            |
| rs3844144 | XP_208554 | Y | H | YH | benign            |

|           |           |   |   |    |                   |
|-----------|-----------|---|---|----|-------------------|
| rs3844239 | XP_378185 | E | G | EG | possibly damaging |
| rs3844257 | NP_060586 | K | R | KR | benign            |
| rs3845152 | XP_378185 | N | H | NH | benign            |
| rs3845153 | XP_378185 | A | T | AT | benign            |
| rs3845154 | XP_378185 | P | A | PA | benign            |
| rs3845276 | XP_499223 | R | C | RC | possibly damaging |
| rs3846973 | XP_379501 | L | P | LP | possibly damaging |
| rs3847262 | NP_277051 | L | F | LF | benign            |
| rs3847531 | XP_061871 | I | V | IV | benign            |
| rs3848519 | NP_000131 | G | C | GC | benign            |
| rs3848568 | NP_001808 | K | R | KR | benign            |
| rs3848570 | NP_115823 | R | H | RH | benign            |
| rs3848591 | XP_058997 | R | H | RH | benign            |
| rs3848614 | NP_006831 | D | H | DH | benign            |
| rs3848666 | NP_067055 | P | R | PR | possibly damaging |
| rs3848668 | NP_057518 | N | S | NS | benign            |
| rs3848668 | NP_116575 | N | S | NS | benign            |
| rs3850531 | NP_055862 | L | S | LS | benign            |
| rs3850625 | NP_000060 | R | C | RC | benign            |
| rs3851294 | NP_056190 | C | R | CR | probably damaging |
| rs3851294 | NP_955749 | C | R | CR | probably damaging |
| rs3852229 | NP_942150 | V | I | VI | benign            |
| rs3852810 | XP_170842 | E | A | EA | benign            |
| rs3852810 | NP_848666 | E | A | EA | possibly damaging |
| rs3853543 | NP_742093 | T | R | TR | benign            |
| rs3853562 | XP_034717 | C | G | CG | probably damaging |
| rs3853620 | XP_495917 | F | L | FL | possibly damaging |
| rs3853648 | XP_290737 | V | G | VG | possibly damaging |
| rs3853814 | NP_001162 | E | K | EK | benign            |
| rs3853916 | XP_378185 | T | A | TA | benign            |
| rs3855556 | XP_371230 | R | S | RS | probably damaging |
| rs3855731 | XP_497653 | R | Q | RQ | benign            |
| rs3855762 | NP_219480 | D | N | DN | benign            |
| rs3855763 | NP_219480 | H | R | HR | benign            |
| rs3855947 | NP_689705 | E | Q | EQ | benign            |
| rs3855990 | XP_378185 | F | L | FL | benign            |
| rs3856177 | XP_371230 | G | E | GE | probably damaging |
| rs3856247 | XP_371243 | G | D | GD | probably damaging |
| rs3856321 | XP_372763 | P | L | PL | benign            |
| rs3857300 | NP_203128 | A | S | AS | benign            |
| rs3857300 | NP_976038 | A | S | AS | benign            |
| rs3857554 | NP_077819 | G | V | GV | benign            |
| rs3857555 | NP_077819 | F | L | FL | benign            |
| rs3857722 | XP_371884 | D | N | DN | benign            |
| rs3858538 | NP_002197 | R | C | RC | benign            |
| rs3859364 | XP_084000 | L | I | LI | benign            |

|           |           |   |   |    |                   |
|-----------|-----------|---|---|----|-------------------|
| rs3859456 | NP_112234 | K | E | KE | benign            |
| rs3859464 | XP_496315 | T | M | TM | benign            |
| rs3859473 | NP_002771 | K | E | KE | benign            |
| rs3859474 | NP_002771 | S | P | SP | benign            |
| rs3859494 | XP_064903 | Y | C | YC | benign            |
| rs3859866 | NP_115997 | W | C | WC | benign            |
| rs3859898 | XP_499187 | R | H | RH | benign            |
| rs3860525 | NP_741980 | G | A | GA | benign            |
| rs3860525 | NP_055222 | G | A | GA | possibly damaging |
| rs3860525 | NP_741979 | G | A | GA | possibly damaging |
| rs3860525 | NP_741981 | G | A | GA | possibly damaging |
| rs3860707 | NP_660306 | S | P | SP | benign            |
| rs3860715 | XP_094066 | G | S | GS | possibly damaging |
| rs3862618 | XP_370663 | R | H | RH | benign            |
| rs3863491 | NP_000287 | M | I | MI | benign            |
| rs3863907 | NP_997195 | S | N | SN | possibly damaging |
| rs3864017 | NP_149075 | P | L | PL | benign            |
| rs3864170 | XP_496691 | L | Q | LQ | probably damaging |
| rs3864915 | XP_495908 | T | I | TI | possibly damaging |
| rs3864916 | XP_495908 | S | G | SG | benign            |
| rs3864938 | XP_045792 | Y | D | YD | benign            |
| rs3864969 | XP_370715 | R | K | RK | benign            |
| rs3864970 | XP_370715 | V | A | VA | benign            |
| rs3865014 | XP_290631 | V | I | VI | benign            |
| rs3865207 | NP_000287 | V | A | VA | benign            |
| rs3865220 | NP_002177 | N | S | NS | benign            |
| rs3865395 | NP_219480 | T | A | TA | benign            |
| rs3865396 | NP_219480 | H | Q | HQ | possibly damaging |
| rs3865452 | NP_079152 | H | R | HR | benign            |
| rs3865707 | XP_377696 | N | D | ND | benign            |
| rs3865756 | NP_001346 | H | N | HN | possibly damaging |
| rs3866467 | XP_372494 | H | R | HR | benign            |
| rs3866773 | XP_092553 | D | E | DE | benign            |
| rs3867153 | XP_495909 | R | G | RG | possibly damaging |
| rs3868142 | XP_290684 | R | H | RH | possibly damaging |
| rs3868855 | XP_496581 | P | A | PA | benign            |
| rs3868856 | XP_496581 | E | K | EK | benign            |
| rs3869003 | XP_379247 | A | P | AP | benign            |
| rs3869152 | NP_942150 | F | I | FI | benign            |
| rs3869427 | NP_775890 | L | P | LP | benign            |
| rs3869428 | NP_775890 | T | S | TS | benign            |
| rs3869579 | NP_085079 | R | C | RC | probably damaging |
| rs3869579 | NP_000755 | R | C | RC | probably damaging |
| rs3869624 | XP_497773 | E | K | EK | benign            |
| rs3870388 | XP_495830 | S | P | SP | benign            |
| rs3870389 | XP_495830 | N | K | NK | benign            |



|           |           |   |   |    |                   |
|-----------|-----------|---|---|----|-------------------|
| rs3870654 | XP_291643 | S | P | SP | benign            |
| rs3871371 | XP_291643 | N | T | NT | benign            |
| rs3871515 | XP_495908 | G | R | GR | benign            |
| rs3871942 | XP_496391 | R | H | RH | benign            |
| rs3871942 | XP_375869 | R | H | RH | benign            |
| rs3872486 | XP_496581 | C | W | CW | probably damaging |
| rs3873306 | NP_821133 | M | V | MV | benign            |
| rs3873635 | XP_379858 | L | S | LS | benign            |
| rs3873635 | XP_496912 | S | L | SL | benign            |
| rs3874112 | XP_495908 | R | Q | RQ | benign            |
| rs3874116 | XP_495908 | V | M | VM | benign            |
| rs3874654 | NP_000287 | R | C | RC | probably damaging |
| rs3874655 | NP_000287 | S | G | SG | benign            |
| rs3877226 | XP_291396 | E | Q | EQ | benign            |
| rs3878008 | XP_495830 | H | D | HD | benign            |
| rs3878009 | XP_495830 | V | I | VI | benign            |
| rs3878010 | XP_495830 | T | M | TM | benign            |
| rs3878375 | XP_497500 | Y | H | YH | benign            |
| rs3878392 | XP_497500 | V | I | VI | benign            |
| rs3878393 | XP_497500 | Q | E | QE | benign            |
| rs3878394 | XP_497500 | E | A | EA | benign            |
| rs3878395 | XP_497500 | K | E | KE | benign            |
| rs3878399 | XP_497500 | V | M | VM | benign            |
| rs3878691 | XP_372941 | T | K | TK | benign            |
| rs3879080 | XP_089866 | I | M | IM | possibly damaging |
| rs3879081 | XP_497258 | R | C | RC | probably damaging |
| rs3881367 | XP_496034 | G | V | GV | probably damaging |
| rs3881420 | NP_004658 | I | V | IV | benign            |
| rs3881673 | NP_899228 | E | Q | EQ | benign            |
| rs3881953 | NP_115287 | R | K | RK | benign            |
| rs3881953 | NP_115288 | R | K | RK | benign            |
| rs3881953 | NP_115286 | R | K | RK | benign            |
| rs3882153 | XP_291643 | A | V | AV | benign            |
| rs3882325 | NP_066278 | V | A | VA | benign            |
| rs3884051 | NP_112234 | N | I | NI | benign            |
| rs3884159 | XP_372640 | T | P | TP | probably damaging |
| rs3885179 | NP_115809 | A | E | AE | benign            |
| rs3885739 | XP_208319 | V | G | VG | probably damaging |
| rs3885816 | NP_000757 | P | L | PL | probably damaging |
| rs3886020 | NP_006751 | A | S | AS | benign            |
| rs3886999 | NP_036202 | R | K | RK | benign            |
| rs3886999 | NP_647538 | R | K | RK | benign            |
| rs3886999 | NP_647537 | R | K | RK | benign            |
| rs3887192 | NP_085137 | Q | H | QH | possibly damaging |
| rs3887623 | XP_372191 | R | Q | RQ | benign            |
| rs3887638 | NP_002522 | S | C | SC | benign            |

|           |           |   |   |    |                   |
|-----------|-----------|---|---|----|-------------------|
| rs3887656 | XP_496341 | L | P | LP | possibly damaging |
| rs3887660 | NP_112536 | V | L | VL | benign            |
| rs3887954 | NP_476429 | G | R | GR | probably damaging |
| rs3888798 | NP_001805 | I | V | IV | benign            |
| rs3888834 | XP_211460 | S | G | SG | benign            |
| rs3888935 | XP_497500 | G | C | GC | probably damaging |
| rs3889063 | NP_066921 | R | P | RP | probably damaging |
| rs3889598 | NP_065902 | S | F | SF | benign            |
| rs3889847 | XP_374014 | S | G | SG | benign            |
| rs3890437 | XP_209559 | R | Q | RQ | benign            |
| rs3890590 | NP_001064 | P | L | PL | probably damaging |
| rs3890844 | NP_659404 | A | D | AD | benign            |
| rs3890998 | NP_997357 | D | N | DN | benign            |
| rs3891058 | NP_000698 | H | Q | HQ | probably damaging |
| rs3891458 | NP_073588 | V | I | VI | benign            |
| rs3891495 | NP_004435 | Y | D | YD | probably damaging |
| rs3891724 | NP_113680 | A | S | AS | benign            |
| rs3891772 | NP_077816 | S | C | SC | possibly damaging |
| rs3891921 | NP_001973 | D | H | DH | possibly damaging |
| rs3892170 | NP_061951 | G | R | GR | benign            |
| rs3892221 | NP_009051 | R | W | RW | benign            |
| rs3892230 | XP_375148 | V | I | VI | benign            |
| rs3892231 | XP_375148 | R | H | RH | benign            |
| rs3892408 | NP_001131 | V | M | VM | probably damaging |
| rs3892554 | NP_783861 | Q | R | QR | benign            |
| rs3893588 | XP_496202 | M | V | MV | benign            |
| rs3893680 | NP_085911 | R | S | RS | possibly damaging |
| rs3893889 | XP_372941 | A | T | AT | benign            |
| rs3893898 | XP_208545 | M | L | ML | probably damaging |
| rs3894082 | NP_002062 | G | E | GE | benign            |
| rs3894082 | NP_892023 | G | E | GE | benign            |
| rs3894129 | XP_371164 | G | A | GA | benign            |
| rs3894157 | XP_496448 | G | S | GS | benign            |
| rs3894168 | XP_291643 | M | V | MV | possibly damaging |
| rs3894194 | NP_835465 | R | Q | RQ | benign            |
| rs3894197 | XP_372437 | T | S | TS | benign            |
| rs3894198 | XP_372437 | A | V | AV | benign            |
| rs3894199 | XP_372437 | G | A | GA | benign            |
| rs3894211 | NP_002817 | N | S | NS | benign            |
| rs3894326 | NP_000140 | I | K | IK | probably damaging |
| rs3894584 | XP_291625 | R | H | RH | benign            |
| rs3894584 | XP_291638 | R | H | RH | benign            |
| rs3894586 | XP_291625 | H | R | HR | benign            |
| rs3894586 | XP_291638 | H | R | HR | benign            |
| rs3894691 | XP_376201 | D | Y | DY | probably damaging |
| rs3894725 | XP_371230 | S | I | SI | possibly damaging |

|           |           |   |   |    |                   |
|-----------|-----------|---|---|----|-------------------|
| rs3895154 | XP_291625 | Q | K | QK | benign            |
| rs3895154 | XP_291638 | Q | K | QK | benign            |
| rs3895411 | XP_498333 | P | T | PT | benign            |
| rs3895517 | XP_497371 | I | T | IT | benign            |
| rs3895546 | XP_057040 | T | K | TK | benign            |
| rs3895576 | NP_038347 | A | V | AV | benign            |
| rs3895787 | XP_372632 | N | S | NS | benign            |
| rs3895995 | XP_291625 | R | C | RC | possibly damaging |
| rs3895995 | XP_291638 | R | C | RC | possibly damaging |
| rs3896260 | NP_821138 | N | K | NK | benign            |
| rs3896492 | XP_495909 | C | Y | CY | possibly damaging |
| rs3896725 | NP_055474 | S | G | SG | benign            |
| rs3896929 | NP_079295 | G | E | GE | benign            |
| rs3896930 | NP_079295 | H | R | HR | benign            |
| rs3896931 | NP_079295 | T | A | TA | benign            |
| rs3896980 | XP_291277 | R | Q | RQ | benign            |
| rs3897277 | XP_212238 | W | S | WS | probably damaging |
| rs3897399 | XP_495965 | H | Y | HY | benign            |
| rs3897433 | NP_001522 | R | Q | RQ | benign            |
| rs3897434 | NP_001522 | A | V | AV | benign            |
| rs3897450 | NP_899228 | V | F | VF | benign            |
| rs3897592 | XP_496266 | E | A | EA | possibly damaging |
| rs3898075 | NP_001538 | Y | C | YC | benign            |
| rs3898166 | NP_057564 | E | K | EK | benign            |
| rs3898167 | NP_057564 | E | K | EK | benign            |
| rs3899049 | XP_208213 | G | S | GS | benign            |
| rs3899528 | NP_077719 | P | H | PH | probably damaging |
| rs3900710 | XP_293923 | S | C | SC | benign            |
| rs3900844 | NP_005865 | G | S | GS | benign            |
| rs3900916 | NP_075390 | S | C | SC | possibly damaging |
| rs3900940 | XP_036988 | T | A | TA | benign            |
| rs3901219 | NP_821133 | E | D | ED | benign            |
| rs3901343 | NP_060298 | V | G | VG | probably damaging |
| rs3901622 | XP_496026 | M | T | MT | possibly damaging |
| rs3902410 | NP_958782 | P | A | PA | possibly damaging |
| rs3902411 | NP_958782 | V | L | VL | benign            |
| rs3903560 | XP_498452 | K | E | KE | benign            |
| rs3905126 | XP_498326 | A | S | AS | benign            |
| rs3905126 | XP_498328 | A | S | AS | benign            |
| rs3905705 | NP_079489 | Q | E | QE | benign            |
| rs3905705 | NP_066022 | Q | E | QE | benign            |
| rs3905725 | NP_055718 | S | N | SN | benign            |
| rs3906659 | XP_047554 | Q | P | QP | probably damaging |
| rs3906956 | NP_004019 | M | T | MT | possibly damaging |
| rs3907239 | NP_003049 | R | K | RK | possibly damaging |
| rs3908150 | NP_002694 | K | Q | KQ | benign            |

|           |           |   |   |    |                   |
|-----------|-----------|---|---|----|-------------------|
| rs3908178 | NP_002251 | T | A | TA | possibly damaging |
| rs3908178 | NP_031359 | T | A | TA | possibly damaging |
| rs3908635 | XP_498326 | H | Y | HY | probably damaging |
| rs3908635 | XP_498328 | H | Y | HY | probably damaging |
| rs3909024 | XP_498328 | E | G | EG | possibly damaging |
| rs3909165 | NP_862823 | F | Y | FY | benign            |
| rs3910283 | NP_116561 | I | F | IF | benign            |
| rs3910433 | NP_898866 | N | S | NS | benign            |
| rs3910433 | NP_898865 | N | S | NS | benign            |
| rs3911730 | NP_775901 | A | S | AS | benign            |
| rs3911864 | XP_084445 | N | K | NK | possibly damaging |
| rs3911892 | NP_057518 | Q | H | QH | benign            |
| rs3911892 | NP_116575 | Q | H | QH | benign            |
| rs3911893 | NP_008860 | D | N | DN | benign            |
| rs3911946 | XP_374014 | D | G | DG | benign            |
| rs3913486 | NP_116026 | P | L | PL | probably damaging |
| rs3913486 | NP_005974 | P | L | PL | probably damaging |
| rs3913487 | NP_116026 | L | I | LI | benign            |
| rs3913487 | NP_005974 | L | I | LI | benign            |
| rs3915061 | NP_787120 | P | R | PR | possibly damaging |
| rs3915806 | XP_376172 | T | P | TP | benign            |
| rs3915951 | NP_000097 | R | L | RL | probably damaging |
| rs3916645 | XP_372543 | I | F | IF | benign            |
| rs3916686 | NP_002446 | V | G | VG | possibly damaging |
| rs3916686 | NP_942584 | V | G | VG | possibly damaging |
| rs3917222 | NP_689668 | Q | L | QL | possibly damaging |
| rs3917223 | NP_777576 | T | A | TA | benign            |
| rs3917407 | NP_000441 | A | S | AS | benign            |
| rs3917408 | NP_000441 | M | I | MI | possibly damaging |
| rs3917422 | NP_000441 | Q | P | QP | benign            |
| rs3917429 | NP_000441 | P | S | PS | possibly damaging |
| rs3917604 | NP_001984 | T | A | TA | benign            |
| rs3917627 | NP_001984 | I | V | IV | benign            |
| rs3917718 | NP_002996 | G | R | GR | possibly damaging |
| rs3917724 | NP_002996 | I | T | IT | benign            |
| rs3917742 | NP_002996 | S | L | SL | benign            |
| rs3917769 | NP_002996 | E | K | EK | benign            |
| rs3917812 | NP_002996 | G | V | GV | probably damaging |
| rs3917814 | NP_002996 | T | N | TN | benign            |
| rs3917815 | NP_002996 | N | S | NS | benign            |
| rs3917869 | NP_002996 | C | F | CF | probably damaging |
| rs3917973 | NP_724781 | M | T | MT | probably damaging |
| rs3917973 | NP_758519 | M | T | MT | probably damaging |
| rs3917973 | NP_000751 | M | T | MT | probably damaging |
| rs3917974 | NP_724781 | Q | R | QR | possibly damaging |
| rs3917974 | NP_758519 | Q | R | QR | possibly damaging |

|           |           |   |   |    |                   |
|-----------|-----------|---|---|----|-------------------|
| rs3917974 | NP_000751 | Q | R | QR | possibly damaging |
| rs3917991 | NP_724781 | D | H | DH | possibly damaging |
| rs3917991 | NP_758519 | D | H | DH | possibly damaging |
| rs3917991 | NP_000751 | D | H | DH | possibly damaging |
| rs3917996 | NP_724781 | Y | H | YH | possibly damaging |
| rs3917996 | NP_758519 | Y | H | YH | possibly damaging |
| rs3917996 | NP_000751 | Y | H | YH | possibly damaging |
| rs3917997 | NP_724781 | R | C | RC | possibly damaging |
| rs3917997 | NP_758519 | R | C | RC | possibly damaging |
| rs3917997 | NP_000751 | R | C | RC | possibly damaging |
| rs3918018 | NP_724781 | D | N | DN | benign            |
| rs3918018 | NP_724780 | D | N | DN | benign            |
| rs3918018 | NP_758519 | D | N | DN | benign            |
| rs3918018 | NP_000751 | D | N | DN | probably damaging |
| rs3918019 | NP_724781 | E | K | EK | benign            |
| rs3918019 | NP_724780 | E | K | EK | benign            |
| rs3918019 | NP_758519 | E | K | EK | benign            |
| rs3918019 | NP_000751 | E | K | EK | benign            |
| rs3918020 | NP_724781 | R | Q | RQ | benign            |
| rs3918020 | NP_724780 | R | Q | RQ | benign            |
| rs3918020 | NP_758519 | R | Q | RQ | benign            |
| rs3918020 | NP_000751 | R | Q | RQ | benign            |
| rs3918143 | NP_005095 | A | V | AV | benign            |
| rs3918166 | NP_000594 | R | Q | RQ | benign            |
| rs3918201 | NP_000594 | R | M | RM | benign            |
| rs3918232 | NP_000594 | V | M | VM | benign            |
| rs3918234 | NP_000594 | Q | L | QL | possibly damaging |
| rs3918248 | NP_004985 | A | V | AV | benign            |
| rs3918252 | NP_004985 | N | K | NK | probably damaging |
| rs3918389 | NP_932173 | G | R | GR | possibly damaging |
| rs3918389 | NP_000326 | G | R | GR | possibly damaging |
| rs3918391 | NP_694882 | Y | H | YH | possibly damaging |
| rs3918391 | NP_079496 | Y | H | YH | possibly damaging |
| rs3918392 | NP_694882 | T | A | TA | benign            |
| rs3918392 | NP_079496 | T | A | TA | benign            |
| rs3918394 | NP_694882 | A | V | AV | benign            |
| rs3918394 | NP_079496 | A | V | AV | benign            |
| rs3918396 | NP_694882 | V | I | VI | benign            |
| rs3918396 | NP_079496 | V | I | VI | benign            |
| rs3918401 | NP_694882 | Q | H | QH | benign            |
| rs3918401 | NP_079496 | Q | H | QH | possibly damaging |
| rs3920038 | NP_031387 | Q | P | QP | benign            |
| rs3922210 | NP_004387 | E | D | ED | benign            |
| rs3922872 | NP_077010 | I | V | IV | benign            |
| rs3923647 | NP_003254 | H | L | HL | probably damaging |
| rs3924227 | NP_005747 | N | S | NS | benign            |

|           |           |   |   |    |                   |
|-----------|-----------|---|---|----|-------------------|
| rs3924999 | NP_039250 | Q | R | QR | benign            |
| rs3924999 | NP_039251 | Q | R | QR | benign            |
| rs3924999 | NP_039252 | Q | R | QR | benign            |
| rs3924999 | NP_039254 | R | Q | RQ | benign            |
| rs3924999 | NP_039258 | R | Q | RQ | benign            |
| rs3924999 | NP_039255 | R | Q | RQ | benign            |
| rs3926493 | XP_084445 | R | H | RH | benign            |
| rs3926769 | XP_496394 | K | R | KR | benign            |
| rs3927589 | NP_005948 | E | D | ED | benign            |
| rs3927729 | NP_077719 | P | L | PL | probably damaging |
| rs3927729 | NP_982283 | P | L | PL | probably damaging |
| rs3927874 | XP_291396 | R | K | RK | benign            |
| rs3928026 | NP_056198 | Q | E | QE | possibly damaging |
| rs3928064 | XP_380175 | E | D | ED | benign            |
| rs3928536 | XP_375313 | C | W | CW | probably damaging |
| rs3928652 | XP_496235 | T | I | TI | benign            |
| rs3928777 | NP_055626 | K | E | KE | benign            |
| rs3929379 | XP_496034 | Q | R | QR | benign            |
| rs3929708 | NP_055564 | G | E | GE | probably damaging |
| rs3929715 | NP_219491 | R | Q | RQ | benign            |
| rs3930033 | XP_496581 | E | V | EV | possibly damaging |
| rs3930075 | XP_291981 | H | R | HR | possibly damaging |
| rs3930388 | XP_295213 | P | S | PS | probably damaging |
| rs3930411 | NP_689849 | K | N | KN | benign            |
| rs3931036 | NP_056201 | I | T | IT | possibly damaging |
| rs3931036 | NP_665817 | I | T | IT | possibly damaging |
| rs3931654 | NP_061880 | C | F | CF | benign            |
| rs3932801 | XP_498018 | N | Y | NY | probably damaging |
| rs3932869 | NP_056086 | R | K | RK | benign            |
| rs3934184 | NP_775909 | Q | H | QH | benign            |
| rs3934184 | NP_056198 | H | Q | HQ | possibly damaging |
| rs3935209 | XP_291266 | S | R | SR | benign            |
| rs3936192 | NP_065871 | S | T | ST | benign            |
| rs3937685 | NP_877417 | F | V | FV | possibly damaging |
| rs3937687 | NP_877417 | S | I | SI | possibly damaging |
| rs3938624 | XP_372191 | R | Q | RQ | benign            |
| rs3938877 | XP_375313 | I | T | IT | benign            |
| rs3939280 | NP_055641 | D | N | DN | benign            |
| rs3939280 | NP_003598 | D | N | DN | possibly damaging |
| rs3940303 | XP_208522 | I | F | IF | benign            |
| rs3940555 | NP_057373 | E | D | ED | benign            |
| rs3940933 | NP_055087 | A | T | AT | benign            |
| rs3943978 | NP_036377 | S | F | SF | possibly damaging |
| rs3944035 | NP_076406 | L | F | LF | benign            |
| rs3945783 | NP_056108 | Q | H | QH | possibly damaging |
| rs3945783 | NP_149062 | Q | H | QH | possibly damaging |

|           |           |   |   |    |                   |
|-----------|-----------|---|---|----|-------------------|
| rs3945783 | NP_892006 | Q | H | QH | possibly damaging |
| rs3946003 | NP_699191 | C | R | CR | possibly damaging |
| rs3946808 | NP_665702 | V | G | VG | possibly damaging |
| rs3948036 | XP_496593 | R | H | RH | possibly damaging |
| rs3948463 | NP_536349 | M | I | MI | benign            |
| rs3948463 | NP_004500 | M | I | MI | benign            |
| rs3948464 | NP_004501 | S | L | SL | benign            |
| rs3948464 | NP_536349 | S | L | SL | benign            |
| rs3948464 | NP_004500 | S | L | SL | benign            |
| rs3950029 | XP_029353 | S | L | SL | benign            |
| rs3950124 | NP_061914 | E | Q | EQ | benign            |
| rs3950374 | NP_683759 | R | P | RP | benign            |
| rs3950374 | NP_060514 | R | P | RP | benign            |
| rs3950388 | NP_066296 | A | D | AD | benign            |
| rs3950485 | XP_375148 | V | M | VM | benign            |
| rs3950485 | XP_496031 | V | M | VM | benign            |
| rs3950588 | NP_085911 | K | R | KR | benign            |
| rs3951216 | NP_002340 | D | E | DE | benign            |
| rs3951906 | XP_496692 | P | L | PL | probably damaging |
| rs3952537 | NP_001073 | A | G | AG | benign            |
| rs3952862 | NP_689805 | T | M | TM | possibly damaging |
| rs3952942 | NP_000287 | V | M | VM | benign            |
| rs3952944 | NP_000287 | T | M | TM | possibly damaging |
| rs3953584 | NP_036581 | I | M | IM | benign            |
| rs3953596 | NP_003202 | S | N | SN | benign            |
| rs3953597 | NP_003202 | G | E | GE | probably damaging |
| rs3953598 | NP_003202 | A | T | AT | benign            |
| rs3953918 | XP_377073 | M | V | MV | benign            |
| rs3953918 | NP_878908 | M | V | MV | benign            |
| rs3954038 | XP_208320 | N | D | ND | benign            |
| rs3954277 | XP_498333 | K | N | KN | benign            |
| rs3954772 | XP_497067 | Y | H | YH | benign            |
| rs3954773 | XP_497067 | S | F | SF | probably damaging |
| rs3954815 | NP_842564 | W | R | WR | benign            |
| rs3956248 | NP_149439 | P | L | PL | benign            |
| rs3956695 | XP_496860 | L | V | LV | benign            |
| rs3957094 | NP_056985 | S | P | SP | benign            |
| rs3957125 | XP_495830 | R | W | RW | probably damaging |
| rs3958118 | NP_695023 | D | E | DE | benign            |
| rs3958222 | NP_899228 | D | A | DA | benign            |
| rs3958533 | NP_004798 | R | S | RS | probably damaging |
| rs3958732 | NP_695022 | D | E | DE | benign            |
| rs3959012 | XP_372030 | L | P | LP | benign            |
| rs3959012 | XP_372028 | L | P | LP | benign            |
| rs3959237 | NP_055474 | E | K | EK | benign            |
| rs3959569 | XP_031706 | R | P | RP | benign            |

|           |           |   |   |    |                   |
|-----------|-----------|---|---|----|-------------------|
| rs3960652 | NP_115534 | A | G | AG | benign            |
| rs3960652 | NP_683738 | A | G | AG | benign            |
| rs3961613 | XP_378185 | Q | H | QH | benign            |
| rs3961873 | XP_496391 | G | C | GC | benign            |
| rs3961873 | XP_375869 | G | C | GC | benign            |
| rs3962575 | NP_722577 | C | R | CR | probably damaging |
| rs3963353 | XP_496917 | N | S | NS | benign            |
| rs3963375 | XP_498109 | L | V | LV | benign            |
| rs3963376 | XP_498109 | M | T | MT | possibly damaging |
| rs3963377 | XP_498109 | V | L | VL | benign            |
| rs3963378 | XP_498109 | Y | H | YH | possibly damaging |
| rs3963704 | XP_496034 | G | S | GS | benign            |
| rs3963858 | XP_496448 | G | D | GD | benign            |
| rs3964420 | XP_496559 | P | L | PL | benign            |
| rs3964421 | XP_496559 | Q | R | QR | benign            |
| rs3964631 | NP_000141 | N | D | ND | benign            |
| rs3964634 | NP_061122 | P | S | PS | possibly damaging |
| rs3964634 | XP_292357 | P | S | PS | possibly damaging |
| rs3964745 | XP_084445 | D | E | DE | benign            |
| rs3964746 | XP_084445 | G | R | GR | benign            |
| rs3964806 | XP_495808 | R | W | RW | benign            |
| rs3965005 | XP_495823 | V | I | VI | benign            |
| rs3966247 | NP_038347 | T | M | TM | benign            |
| rs3966273 | XP_496518 | N | S | NS | benign            |
| rs3966274 | XP_496518 | T | A | TA | possibly damaging |
| rs3966277 | XP_496518 | V | D | VD | benign            |
| rs3966348 | NP_543029 | N | S | NS | benign            |
| rs3966348 | NP_954578 | N | S | NS | benign            |
| rs3967767 | NP_006165 | D | N | DN | benign            |
| rs3968137 | XP_371534 | L | I | LI | benign            |
| rs3968186 | XP_497391 | H | N | HN | benign            |
| rs3968196 | XP_497391 | V | L | VL | benign            |
| rs3968285 | XP_211858 | Q | R | QR | benign            |
| rs3968287 | XP_211858 | N | H | NH | probably damaging |
| rs3968300 | NP_006301 | R | C | RC | probably damaging |
| rs3969147 | NP_002800 | E | D | ED | benign            |
| rs3969711 | XP_496394 | V | F | VF | possibly damaging |
| rs3969856 | XP_371227 | R | W | RW | possibly damaging |
| rs3969860 | NP_004274 | V | I | VI | benign            |
| rs3970483 | XP_496493 | M | L | ML | benign            |
| rs3970555 | NP_057419 | P | L | PL | probably damaging |
| rs3970559 | NP_057419 | R | C | RC | probably damaging |
| rs3971938 | XP_378983 | R | H | RH | possibly damaging |
| rs3971939 | XP_378983 | I | T | IT | benign            |
| rs3971940 | XP_378983 | V | A | VA | benign            |
| rs3973263 | NP_778234 | M | R | MR | benign            |



|           |           |   |   |    |                   |
|-----------|-----------|---|---|----|-------------------|
| rs3973263 | XP_374460 | M | R | MR | benign            |
| rs3974688 | XP_208058 | E | G | EG | possibly damaging |
| rs3975155 | XP_372403 | F | V | FV | possibly damaging |
| rs3975560 | XP_211908 | K | E | KE | benign            |
| rs3975564 | XP_497958 | H | N | HN | benign            |
| rs3975773 | XP_379121 | I | T | IT | benign            |
| rs3975775 | XP_379121 | W | R | WR | benign            |
| rs3975776 | XP_379121 | L | Q | LQ | possibly damaging |
| rs3977284 | NP_056198 | C | W | CW | probably damaging |
| rs3979437 | NP_114127 | R | W | RW | possibly damaging |
| rs3979611 | XP_208072 | R | H | RH | benign            |
| rs3979893 | XP_496391 | L | V | LV | benign            |
| rs3979893 | XP_375869 | L | V | LV | benign            |
| rs3981076 | XP_380121 | T | S | TS | benign            |
| rs3982643 | XP_377073 | R | H | RH | possibly damaging |
| rs3982643 | NP_878908 | R | H | RH | possibly damaging |
| rs3983135 | XP_497659 | S | A | SA | benign            |
| rs3983531 | NP_116559 | M | V | MV | benign            |
| rs3983531 | NP_002898 | M | V | MV | benign            |
| rs3983991 | NP_997357 | H | R | HR | benign            |
| rs3986371 | XP_377159 | S | N | SN | benign            |
| rs3986599 | NP_055370 | V | A | VA | benign            |
| rs3987776 | NP_742094 | H | R | HR | benign            |
| rs3987776 | NP_742093 | H | R | HR | probably damaging |
| rs3987776 | NP_473361 | H | R | HR | probably damaging |
| rs3987779 | NP_742094 | E | D | ED | benign            |
| rs3987779 | NP_742093 | E | D | ED | benign            |
| rs3987779 | NP_473361 | E | D | ED | benign            |
| rs3987780 | NP_742094 | D | A | DA | possibly damaging |
| rs3987780 | NP_742093 | D | A | DA | possibly damaging |
| rs3987780 | NP_473361 | D | A | DA | probably damaging |
| rs3987794 | NP_742094 | R | C | RC | benign            |
| rs3987794 | NP_742093 | R | C | RC | possibly damaging |
| rs3987794 | NP_473361 | R | C | RC | possibly damaging |
| rs3987795 | NP_742094 | R | Q | RQ | benign            |
| rs3987795 | NP_742093 | R | Q | RQ | benign            |
| rs3987795 | NP_473361 | R | Q | RQ | benign            |
| rs3989369 | NP_542984 | P | S | PS | benign            |
| rs3989369 | NP_059142 | P | S | PS | benign            |
| rs3989642 | XP_496962 | A | V | AV | benign            |
| rs3989697 | XP_208563 | L | V | LV | benign            |
| rs3989698 | XP_208563 | G | R | GR | probably damaging |
| rs3989701 | XP_208563 | S | A | SA | benign            |
| rs3989704 | XP_373243 | D | N | DN | benign            |
| rs3989706 | XP_373243 | N | D | ND | benign            |
| rs3990244 | NP_695022 | V | M | VM | probably damaging |

|           |           |   |   |    |                   |
|-----------|-----------|---|---|----|-------------------|
| rs3990245 | NP_695022 | F | L | FL | benign            |
| rs3991747 | NP_000642 | V | A | VA | benign            |
| rs3991747 | NP_000564 | V | A | VA | benign            |
| rs3992690 | NP_899228 | S | T | ST | benign            |
| rs3992691 | NP_899228 | L | V | LV | benign            |
| rs3992692 | NP_899228 | E | K | EK | benign            |
| rs3992693 | NP_899228 | G | E | GE | benign            |
| rs3992694 | NP_899228 | L | V | LV | benign            |
| rs3993295 | NP_695023 | F | L | FL | benign            |
| rs3993297 | NP_695023 | F | L | FL | benign            |
| rs3993298 | NP_695023 | V | A | VA | benign            |
| rs3993299 | NP_695023 | V | A | VA | benign            |
| rs3993300 | NP_695023 | T | S | TS | benign            |
| rs3993301 | NP_695023 | K | E | KE | benign            |
| rs3993313 | NP_852609 | E | K | EK | benign            |
| rs3993409 | NP_075387 | M | V | MV | benign            |
| rs3993409 | NP_542418 | M | V | MV | possibly damaging |
| rs3993410 | NP_542418 | E | K | EK | benign            |
| rs3993410 | NP_075387 | E | K | EK | benign            |
| rs3993983 | NP_036349 | A | T | AT | benign            |
| rs3993986 | NP_036349 | E | G | EG | benign            |
| rs3993987 | NP_036349 | V | M | VM | benign            |
| rs3995818 | NP_115582 | H | R | HR | possibly damaging |
| rs3998247 | XP_374801 | E | K | EK | benign            |
| rs3998247 | XP_495830 | V | I | VI | benign            |
| rs3998268 | NP_597703 | C | Y | CY | benign            |
| rs3998268 | XP_495830 | Y | C | YC | probably damaging |
| rs3998271 | XP_495830 | D | E | DE | benign            |
| rs3998271 | NP_597703 | D | E | DE | benign            |
| rs3998273 | XP_495830 | Q | R | QR | benign            |
| rs3998273 | NP_597703 | Q | R | QR | benign            |
| rs3998860 | NP_085128 | M | I | MI | benign            |
| rs3999941 | NP_065150 | F | L | FL | probably damaging |
| rs4000170 | XP_496860 | I | S | IS | benign            |
| rs4000303 | XP_496374 | H | R | HR | benign            |
| rs4000304 | XP_496374 | L | V | LV | benign            |
| rs4000308 | XP_496374 | S | A | SA | benign            |
| rs4000311 | XP_496374 | A | V | AV | benign            |
| rs4000312 | XP_496374 | T | A | TA | possibly damaging |
| rs4001221 | XP_371405 | S | P | SP | possibly damaging |
| rs4001222 | XP_371405 | D | H | DH | probably damaging |
| rs4001249 | XP_371405 | S | R | SR | possibly damaging |
| rs4001250 | XP_371405 | R | G | RG | possibly damaging |
| rs4002067 | XP_374920 | G | W | GW | probably damaging |
| rs4002067 | XP_374917 | W | G | WG | probably damaging |
| rs4002403 | XP_498797 | P | Q | PQ | probably damaging |

|           |           |   |   |    |                   |
|-----------|-----------|---|---|----|-------------------|
| rs4002413 | NP_149439 | P | T | PT | probably damaging |
| rs4002414 | NP_149439 | K | R | KR | benign            |
| rs4005470 | XP_291643 | R | S | RS | benign            |
| rs4008242 | NP_219480 | C | G | CG | possibly damaging |
| rs4008243 | NP_219480 | F | C | FC | benign            |
| rs4008248 | NP_219480 | I | V | IV | benign            |
| rs4008249 | NP_219480 | S | R | SR | benign            |
| rs4008250 | NP_219480 | S | R | SR | possibly damaging |
| rs4008251 | NP_219480 | S | N | SN | benign            |
| rs4008480 | XP_376314 | T | I | TI | benign            |
| rs4008658 | NP_001161 | K | T | KT | benign            |
| rs4008659 | NP_001161 | V | L | VL | benign            |
| rs4008950 | NP_004314 | R | G | RG | possibly damaging |
| rs4009394 | NP_842564 | M | T | MT | benign            |
| rs4009397 | NP_842564 | T | P | TP | benign            |
| rs4009627 | NP_443116 | S | N | SN | benign            |
| rs4009628 | NP_443116 | F | L | FL | possibly damaging |
| rs4011529 | NP_056261 | R | K | RK | benign            |
| rs4011726 | XP_498333 | L | W | LW | probably damaging |
| rs4011728 | XP_498333 | R | M | RM | benign            |
| rs4011729 | XP_498333 | K | E | KE | benign            |
| rs4011730 | XP_498333 | R | Q | RQ | benign            |
| rs4012379 | XP_496581 | C | Y | CY | probably damaging |
| rs4012380 | XP_496581 | Y | C | YC | probably damaging |
| rs4012382 | XP_496581 | P | L | PL | probably damaging |
| rs4012421 | XP_496581 | A | V | AV | benign            |
| rs4012423 | XP_496581 | D | N | DN | benign            |
| rs4012605 | XP_495908 | S | N | SN | benign            |
| rs4013197 | XP_171224 | A | V | AV | benign            |
| rs4013630 | NP_878908 | I | S | IS | benign            |
| rs4013630 | XP_377073 | S | I | SI | benign            |
| rs4013631 | NP_878908 | G | S | GS | possibly damaging |
| rs4013631 | XP_377073 | S | G | SG | possibly damaging |
| rs4013661 | XP_377073 | W | R | WR | benign            |
| rs4013661 | NP_878908 | W | R | WR | benign            |
| rs4013819 | XP_497005 | S | T | ST | benign            |
| rs4014769 | XP_495908 | P | A | PA | probably damaging |
| rs4015375 | NP_036581 | H | Q | HQ | benign            |
| rs4015376 | NP_036581 | I | V | IV | benign            |
| rs4015377 | NP_036581 | L | V | LV | benign            |
| rs4015573 | XP_497335 | G | R | GR | possibly damaging |
| rs4015574 | XP_497335 | G | V | GV | probably damaging |
| rs4016638 | NP_002196 | Q | P | QP | possibly damaging |
| rs4016871 | XP_370939 | I | V | IV | benign            |
| rs4016978 | XP_209910 | K | N | KN | benign            |
| rs4017999 | NP_851849 | R | H | RH | benign            |

|           |           |   |   |    |                   |
|-----------|-----------|---|---|----|-------------------|
| rs4018147 | NP_000287 | R | P | RP | probably damaging |
| rs4018169 | NP_000287 | T | M | TM | possibly damaging |
| rs4018172 | NP_000287 | S | G | SG | benign            |
| rs4019122 | NP_073153 | N | S | NS | benign            |
| rs4019823 | NP_055642 | L | S | LS | benign            |
| rs4020187 | NP_056952 | A | T | AT | benign            |
| rs4020187 | NP_055326 | A | T | AT | benign            |
| rs4020197 | NP_056952 | V | A | VA | benign            |
| rs4020197 | NP_055326 | V | A | VA | benign            |
| rs4020198 | NP_056952 | R | S | RS | benign            |
| rs4020198 | NP_055326 | R | S | RS | benign            |
| rs4020346 | NP_001073 | T | A | TA | benign            |
| rs4020699 | NP_055328 | S | A | SA | benign            |
| rs4021254 | XP_495883 | S | A | SA | benign            |
| rs4021281 | XP_495883 | Q | R | QR | possibly damaging |
| rs4021403 | XP_059923 | S | A | SA | benign            |
| rs4021405 | XP_059923 | K | E | KE | benign            |
| rs4021407 | XP_059923 | E | A | EA | benign            |
| rs4023128 | XP_372191 | V | I | VI | benign            |
| rs4023155 | XP_372191 | P | H | PH | benign            |
| rs4023333 | XP_496691 | L | F | LF | benign            |
| rs4023334 | XP_496691 | V | A | VA | benign            |
| rs4024339 | NP_067053 | S | N | SN | benign            |
| rs4024339 | NP_733751 | S | N | SN | benign            |
| rs4024346 | NP_067053 | R | L | RL | probably damaging |
| rs4024346 | NP_733751 | R | L | RL | probably damaging |
| rs4024358 | NP_067053 | L | F | LF | benign            |
| rs4024358 | NP_733751 | L | F | LF | benign            |
| rs4024360 | NP_067053 | G | D | GD | possibly damaging |
| rs4024360 | NP_733751 | G | D | GD | possibly damaging |
| rs4024402 | NP_067053 | M | I | MI | possibly damaging |
| rs4024402 | NP_733751 | M | I | MI | possibly damaging |
| rs4024419 | NP_733751 | G | E | GE | probably damaging |
| rs4024420 | NP_733751 | E | G | EG | possibly damaging |
| rs4024453 | NP_733751 | S | L | SL | possibly damaging |
| rs4025981 | NP_006384 | M | V | MV | benign            |
| rs4026148 | XP_291395 | R | H | RH | possibly damaging |
| rs4026250 | XP_372763 | V | M | VM | benign            |
| rs4026337 | XP_497653 | L | V | LV | benign            |
| rs4026352 | XP_497653 | C | Y | CY | probably damaging |
| rs4026353 | XP_497653 | C | R | CR | probably damaging |
| rs4026355 | XP_497653 | T | I | TI | possibly damaging |
| rs4026356 | XP_497653 | G | C | GC | benign            |
| rs4026357 | XP_497653 | L | F | LF | benign            |
| rs4027455 | NP_037395 | D | V | DV | possibly damaging |
| rs4027458 | NP_037395 | S | G | SG | benign            |

|           |           |   |   |    |                   |
|-----------|-----------|---|---|----|-------------------|
| rs4028135 | NP_942150 | H | P | HP | probably damaging |
| rs4028138 | NP_942150 | H | Q | HQ | probably damaging |
| rs4028443 | NP_002775 | T | A | TA | benign            |
| rs4028445 | NP_002775 | I | M | IM | benign            |
| rs4028471 | NP_002772 | S | L | SL | benign            |
| rs4028590 | XP_496399 | T | S | TS | benign            |
| rs4028591 | XP_496399 | S | R | SR | benign            |
| rs4029140 | XP_497629 | I | V | IV | benign            |
| rs4029141 | XP_497629 | S | T | ST | benign            |
| rs4030982 | NP_683759 | W | R | WR | possibly damaging |
| rs4030982 | NP_060514 | W | R | WR | possibly damaging |
| rs4034612 | NP_061914 | D | N | DN | benign            |
| rs4035286 | XP_496917 | R | K | RK | benign            |
| rs4035416 | XP_498109 | C | G | CG | probably damaging |
| rs4035907 | NP_004658 | I | S | IS | benign            |
| rs4036675 | XP_370839 | E | K | EK | benign            |
| rs4036675 | XP_496096 | E | K | EK | benign            |
| rs4036679 | XP_370839 | R | C | RC | benign            |
| rs4036679 | XP_496096 | R | C | RC | benign            |
| rs4036681 | XP_370839 | Q | H | QH | benign            |
| rs4036681 | XP_496096 | Q | H | QH | benign            |
| rs4036682 | XP_370839 | Y | H | YH | benign            |
| rs4036682 | XP_496096 | Y | H | YH | benign            |
| rs4036683 | XP_370839 | Q | R | QR | benign            |
| rs4036683 | XP_496096 | Q | R | QR | benign            |
| rs4036684 | XP_370839 | E | D | ED | benign            |
| rs4036684 | XP_496096 | E | D | ED | benign            |
| rs4036799 | XP_293177 | E | K | EK | benign            |
| rs4037640 | XP_171032 | G | R | GR | probably damaging |
| rs4037641 | XP_171032 | G | E | GE | benign            |
| rs4037776 | XP_495941 | V | L | VL | benign            |
| rs4037778 | XP_495941 | V | M | VM | benign            |
| rs4037858 | XP_496448 | G | S | GS | benign            |
| rs4037861 | XP_496448 | H | Q | HQ | benign            |
| rs4040421 | XP_496559 | Q | R | QR | benign            |
| rs4040446 | XP_496559 | C | Y | CY | benign            |
| rs4042020 | XP_290482 | K | N | KN | benign            |
| rs4042020 | XP_350781 | K | N | KN | benign            |
| rs4042102 | NP_114400 | R | L | RL | benign            |
| rs4042102 | NP_061739 | R | L | RL | possibly damaging |
| rs4042218 | XP_084445 | D | E | DE | benign            |
| rs4042218 | XP_374801 | E | D | ED | benign            |
| rs4042219 | XP_374801 | E | K | EK | benign            |
| rs4042219 | XP_084445 | E | K | EK | benign            |
| rs4042220 | XP_374801 | R | L | RL | benign            |
| rs4042220 | XP_084445 | L | R | LR | probably damaging |

|           |           |   |   |    |                   |
|-----------|-----------|---|---|----|-------------------|
| rs4042221 | XP_374801 | E | V | EV | benign            |
| rs4042221 | XP_084445 | E | V | EV | benign            |
| rs4042222 | XP_084445 | E | K | EK | benign            |
| rs4042224 | XP_084445 | D | E | DE | benign            |
| rs4043615 | XP_495823 | L | S | LS | benign            |
| rs4043616 | XP_495823 | Q | R | QR | benign            |
| rs4043618 | XP_495823 | R | Q | RQ | benign            |
| rs4043619 | XP_495823 | M | V | MV | possibly damaging |
| rs4043620 | XP_495823 | S | P | SP | benign            |
| rs4043621 | XP_495823 | N | K | NK | benign            |
| rs4043622 | XP_495823 | T | M | TM | benign            |
| rs4043635 | XP_495823 | D | E | DE | benign            |
| rs4043636 | XP_495823 | R | C | RC | benign            |
| rs4043644 | XP_495823 | I | S | IS | possibly damaging |
| rs4043645 | XP_495823 | D | N | DN | benign            |
| rs4044210 | NP_055061 | I | V | IV | benign            |
| rs4044526 | NP_942154 | V | A | VA | benign            |
| rs4046242 | XP_497500 | T | A | TA | benign            |
| rs4049504 | NP_000487 | T | M | TM | possibly damaging |
| rs4049687 | XP_496520 | R | C | RC | benign            |
| rs4049829 | NP_038347 | A | V | AV | benign            |
| rs4049882 | NP_038347 | A | T | AT | benign            |
| rs4049973 | XP_371424 | G | R | GR | benign            |
| rs4050393 | XP_496513 | R | Q | RQ | benign            |
| rs4050503 | NP_543032 | A | T | AT | benign            |
| rs4050505 | NP_543032 | H | R | HR | benign            |
| rs4050961 | NP_055449 | S | C | SC | benign            |
| rs4051625 | XP_290331 | M | T | MT | possibly damaging |
| rs4051627 | XP_290331 | P | L | PL | probably damaging |
| rs4051628 | XP_290331 | T | I | TI | possibly damaging |
| rs4052449 | XP_372494 | K | N | KN | benign            |
| rs4052452 | XP_372494 | E | G | EG | possibly damaging |
| rs4052457 | XP_372494 | K | R | KR | benign            |
| rs4052458 | XP_372494 | Y | H | YH | benign            |
| rs4052459 | XP_372494 | S | P | SP | possibly damaging |
| rs4052460 | XP_372494 | R | K | RK | benign            |
| rs4052462 | XP_372494 | A | V | AV | benign            |
| rs4052562 | NP_066278 | A | V | AV | benign            |
| rs4054106 | XP_209554 | P | T | PT | benign            |
| rs4055055 | XP_209910 | M | R | MR | benign            |
| rs4055056 | XP_209910 | L | P | LP | probably damaging |
| rs4055057 | XP_209910 | R | C | RC | benign            |
| rs4055058 | XP_209910 | P | S | PS | possibly damaging |
| rs4055059 | XP_209910 | K | R | KR | benign            |
| rs4055363 | XP_497046 | C | R | CR | benign            |
| rs4056578 | XP_372108 | L | P | LP | benign            |

|           |           |   |   |    |                   |
|-----------|-----------|---|---|----|-------------------|
| rs4056599 | XP_372108 | I | M | IM | benign            |
| rs4057749 | XP_210186 | C | R | CR | probably damaging |
| rs4057750 | XP_210186 | Y | H | YH | probably damaging |
| rs4058025 | NP_620155 | N | D | ND | benign            |
| rs4058438 | NP_000557 | V | I | VI | benign            |
| rs4060171 | XP_372500 | A | T | AT | benign            |
| rs4060652 | XP_211858 | C | Y | CY | probably damaging |
| rs4060653 | XP_211858 | Q | R | QR | benign            |
| rs4061664 | XP_372191 | E | K | EK | benign            |
| rs4067388 | NP_775909 | Q | K | QK | benign            |
| rs4067733 | NP_073153 | G | V | GV | probably damaging |
| rs4067934 | NP_598334 | Y | H | YH | possibly damaging |
| rs4067934 | NP_002932 | Y | H | YH | possibly damaging |
| rs4067961 | XP_370715 | C | R | CR | benign            |
| rs4067961 | NP_848635 | R | C | RC | benign            |
| rs4068083 | XP_496394 | A | D | AD | benign            |
| rs4068114 | XP_496394 | H | Q | HQ | benign            |
| rs4072111 | NP_757366 | P | S | PS | possibly damaging |
| rs4072393 | NP_079123 | E | G | EG | benign            |
| rs4073458 | NP_542155 | R | G | RG | benign            |
| rs4073458 | NP_542156 | R | G | RG | benign            |
| rs4073918 | NP_872438 | L | P | LP | possibly damaging |
| rs4074320 | XP_066534 | D | N | DN | benign            |
| rs4074333 | XP_060537 | D | Y | DY | probably damaging |
| rs4074391 | XP_375148 | G | V | GV | probably damaging |
| rs4074392 | XP_375148 | Q | E | QE | benign            |
| rs4074536 | NP_001223 | T | A | TA | benign            |
| rs4074581 | XP_497821 | D | H | DH | possibly damaging |
| rs4075254 | NP_009131 | V | M | VM | benign            |
| rs4075254 | NP_006729 | V | M | VM | benign            |
| rs4075256 | NP_009131 | V | A | VA | benign            |
| rs4075256 | NP_006729 | V | A | VA | benign            |
| rs4075258 | XP_292136 | L | P | LP | possibly damaging |
| rs4075259 | XP_292136 | R | C | RC | probably damaging |
| rs4075289 | NP_775855 | I | S | IS | benign            |
| rs4075307 | NP_078999 | P | L | PL | probably damaging |
| rs4075307 | NP_891554 | P | L | PL | probably damaging |
| rs4076029 | NP_071881 | A | T | AT | benign            |
| rs4076700 | NP_036306 | R | Q | RQ | benign            |
| rs4076700 | NP_699179 | R | Q | RQ | benign            |
| rs4076770 | NP_055598 | T | I | TI | benign            |
| rs4076770 | NP_955389 | T | I | TI | possibly damaging |
| rs4076794 | NP_849150 | D | E | DE | benign            |
| rs4076795 | NP_849150 | E | D | ED | benign            |
| rs4077005 | XP_496731 | E | G | EG | possibly damaging |
| rs4077109 | NP_004534 | T | A | TA | benign            |

|           |           |   |   |    |                   |
|-----------|-----------|---|---|----|-------------------|
| rs4077515 | NP_434700 | S | N | SN | benign            |
| rs4077812 | NP_659443 | K | E | KE | benign            |
| rs4077930 | NP_689752 | G | S | GS | benign            |
| rs4078115 | NP_940933 | S | G | SG | benign            |
| rs4078556 | XP_372941 | A | G | AG | benign            |
| rs4078634 | XP_496202 | N | D | ND | possibly damaging |
| rs4078883 | XP_497621 | G | S | GS | benign            |
| rs4079061 | NP_000413 | H | R | HR | probably damaging |
| rs4079166 | XP_497500 | V | M | VM | benign            |
| rs4079290 | XP_496049 | D | A | DA | possibly damaging |
| rs4079290 | NP_775884 | D | A | DA | possibly damaging |
| rs4079291 | XP_496049 | R | C | RC | benign            |
| rs4079291 | NP_775884 | R | C | RC | benign            |
| rs4079328 | NP_775884 | L | V | LV | benign            |
| rs4079329 | NP_775884 | H | D | HD | possibly damaging |
| rs4079330 | NP_775884 | A | S | AS | benign            |
| rs4079344 | XP_377446 | C | F | CF | benign            |
| rs4079366 | NP_085079 | H | R | HR | benign            |
| rs4079366 | NP_000755 | H | R | HR | benign            |
| rs4079642 | XP_496049 | D | N | DN | benign            |
| rs4079642 | NP_775884 | D | N | DN | benign            |
| rs4079744 | XP_291396 | R | H | RH | benign            |
| rs4079824 | XP_496798 | T | A | TA | benign            |
| rs4080076 | NP_072053 | N | K | NK | benign            |
| rs4080076 | NP_072054 | N | K | NK | benign            |
| rs4080076 | NP_072055 | N | K | NK | benign            |
| rs4080076 | NP_000506 | N | K | NK | benign            |
| rs4080145 | NP_061759 | R | S | RS | probably damaging |
| rs4080263 | XP_375344 | T | A | TA | benign            |
| rs4080719 | NP_005304 | D | Y | DY | possibly damaging |
| rs4080958 | NP_055222 | Q | R | QR | benign            |
| rs4080958 | NP_741979 | Q | R | QR | benign            |
| rs4080958 | NP_741980 | Q | R | QR | benign            |
| rs4080958 | NP_741981 | Q | R | QR | benign            |
| rs4081187 | XP_370715 | Q | P | QP | benign            |
| rs4081196 | XP_495840 | G | A | GA | benign            |
| rs4081197 | XP_495840 | G | S | GS | benign            |
| rs4081343 | XP_496343 | C | R | CR | possibly damaging |
| rs4081343 | XP_496345 | C | R | CR | possibly damaging |
| rs4081382 | NP_055568 | I | V | IV | benign            |
| rs4081569 | NP_039228 | L | S | LS | possibly damaging |
| rs4082155 | NP_036403 | P | L | PL | benign            |
| rs4082155 | NP_054878 | P | L | PL | benign            |
| rs4082354 | XP_372092 | K | T | KT | benign            |
| rs4082354 | XP_497031 | K | T | KT | possibly damaging |
| rs4082360 | NP_055087 | A | T | AT | benign            |



|           |           |   |   |    |                   |
|-----------|-----------|---|---|----|-------------------|
| rs4082530 | XP_495917 | V | L | VL | benign            |
| rs4082733 | NP_077318 | D | V | DV | probably damaging |
| rs4082929 | NP_001763 | R | W | RW | possibly damaging |
| rs4083018 | XP_496692 | I | T | IT | benign            |
| rs4083122 | XP_370660 | L | F | LF | benign            |
| rs4084080 | XP_166227 | K | T | KT | possibly damaging |
| rs4084209 | XP_372436 | V | E | VE | probably damaging |
| rs4084603 | XP_379275 | D | N | DN | benign            |
| rs4084699 | XP_210365 | L | M | LM | benign            |
| rs4084790 | XP_497517 | F | I | FI | benign            |
| rs4084822 | NP_002175 | Q | H | QH | benign            |
| rs4084824 | NP_002175 | E | K | EK | benign            |
| rs4084962 | XP_370939 | S | N | SN | benign            |
| rs4086439 | XP_498326 | H | N | HN | benign            |
| rs4086439 | XP_498328 | H | N | HN | benign            |
| rs4086440 | XP_498326 | N | K | NK | benign            |
| rs4086440 | XP_498328 | N | K | NK | benign            |
| rs4087790 | NP_112234 | E | G | EG | probably damaging |
| rs4087943 | XP_372548 | R | H | RH | benign            |
| rs4088092 | XP_371424 | P | L | PL | benign            |
| rs4089744 | NP_073153 | S | F | SF | benign            |
| rs4089745 | NP_073153 | N | K | NK | benign            |
| rs4089952 | XP_496394 | F | L | FL | possibly damaging |
| rs4090319 | XP_371111 | T | M | TM | benign            |
| rs4092743 | NP_003209 | L | V | LV | benign            |
| rs4092743 | NP_059523 | L | V | LV | benign            |
| rs4094020 | XP_496692 | V | D | VD | possibly damaging |
| rs4094022 | XP_496692 | M | V | MV | benign            |
| rs4094357 | XP_495896 | V | M | VM | probably damaging |
| rs4094946 | NP_037447 | Q | E | QE | benign            |
| rs4094946 | NP_954869 | Q | E | QE | benign            |
| rs4094946 | NP_954870 | Q | E | QE | benign            |
| rs4095564 | NP_001066 | A | T | AT | possibly damaging |
| rs4095667 | XP_372190 | R | W | RW | benign            |
| rs4095853 | XP_377797 | T | I | TI | benign            |
| rs4096218 | XP_372632 | I | V | IV | benign            |
| rs4096557 | XP_496692 | H | Q | HQ | benign            |
| rs4098165 | XP_495965 | L | S | LS | benign            |
| rs4098273 | NP_066188 | S | C | SC | benign            |
| rs4098706 | XP_498326 | V | I | VI | benign            |
| rs4100180 | XP_047554 | G | D | GD | benign            |
| rs4100180 | XP_047550 | G | D | GD | benign            |
| rs4100182 | XP_047554 | C | Y | CY | probably damaging |
| rs4100182 | XP_047550 | C | Y | CY | probably damaging |
| rs4100183 | XP_047554 | P | T | PT | probably damaging |
| rs4100183 | XP_047550 | P | T | PT | probably damaging |

|           |           |   |   |    |                   |
|-----------|-----------|---|---|----|-------------------|
| rs4100184 | XP_047554 | K | E | KE | benign            |
| rs4100184 | XP_047550 | K | E | KE | benign            |
| rs4101176 | XP_496266 | S | N | SN | benign            |
| rs4101859 | XP_496593 | G | V | GV | benign            |
| rs4101860 | XP_496593 | F | L | FL | benign            |
| rs4101860 | XP_292982 | F | L | FL | benign            |
| rs4102539 | XP_371511 | V | A | VA | possibly damaging |
| rs4103913 | XP_496692 | V | M | VM | benign            |
| rs4104582 | XP_496692 | C | Y | CY | probably damaging |
| rs4104611 | XP_496692 | S | F | SF | benign            |
| rs4107048 | XP_372543 | S | N | SN | benign            |
| rs4107584 | XP_496601 | K | N | KN | benign            |
| rs4107585 | XP_496601 | I | T | IT | benign            |
| rs4108238 | XP_495891 | R | Q | RQ | benign            |
| rs4108238 | XP_061890 | Q | R | QR | possibly damaging |
| rs4108239 | XP_495891 | L | V | LV | benign            |
| rs4108239 | XP_061890 | V | L | VL | benign            |
| rs4109777 | NP_009086 | T | I | TI | probably damaging |
| rs4109778 | NP_009086 | G | R | GR | benign            |
| rs4111296 | XP_165533 | V | I | VI | benign            |
| rs4113153 | XP_497652 | R | W | RW | probably damaging |
| rs4113481 | XP_497071 | T | M | TM | benign            |
| rs4113719 | XP_496692 | M | T | MT | benign            |
| rs4114105 | XP_372941 | G | D | GD | possibly damaging |
| rs4114106 | XP_372941 | A | T | AT | benign            |
| rs4114298 | XP_039702 | K | N | KN | benign            |
| rs4115375 | XP_371304 | R | C | RC | benign            |
| rs4115375 | XP_371302 | R | C | RC | benign            |
| rs4115506 | NP_982273 | A | V | AV | benign            |
| rs4116240 | XP_375344 | V | A | VA | benign            |
| rs4116992 | XP_372424 | S | A | SA | benign            |
| rs4117966 | XP_071093 | C | Y | CY | probably damaging |
| rs4118032 | XP_208058 | R | P | RP | possibly damaging |
| rs4118033 | XP_208058 | E | K | EK | benign            |
| rs4118127 | XP_115100 | V | F | VF | possibly damaging |
| rs4118646 | XP_496691 | V | A | VA | benign            |
| rs4118647 | XP_496692 | N | I | NI | probably damaging |
| rs4118699 | XP_496692 | L | P | LP | possibly damaging |
| rs4118821 | XP_496541 | E | K | EK | benign            |
| rs4119406 | XP_496692 | D | Y | DY | benign            |
| rs4119420 | XP_496692 | F | L | FL | benign            |
| rs4121657 | NP_005924 | S | P | SP | possibly damaging |
| rs4125931 | XP_496691 | P | A | PA | benign            |
| rs4128458 | NP_005549 | K | E | KE | benign            |
| rs4129008 | NP_112218 | R | Q | RQ | benign            |
| rs4129009 | NP_112218 | I | L | IL | benign            |

|           |           |   |   |    |                   |
|-----------|-----------|---|---|----|-------------------|
| rs4129190 | NP_060741 | E | G | EG | benign            |
| rs4129456 | XP_371369 | K | R | KR | benign            |
| rs4130100 | NP_037493 | R | K | RK | benign            |
| rs4130101 | NP_037493 | L | I | LI | benign            |
| rs4130106 | NP_055312 | E | Q | EQ | benign            |
| rs4130426 | NP_694534 | S | F | SF | possibly damaging |
| rs4131108 | NP_005493 | M | L | ML | possibly damaging |
| rs4131311 | NP_004246 | K | N | KN | possibly damaging |
| rs4132182 | NP_938018 | R | Q | RQ | possibly damaging |
| rs4132835 | NP_078810 | R | C | RC | possibly damaging |
| rs4132935 | XP_291321 | S | F | SF | benign            |
| rs4133735 | NP_078993 | S | I | SI | possibly damaging |
| rs4134436 | NP_002205 | E | D | ED | benign            |
| rs4134897 | NP_620834 | C | S | CS | probably damaging |
| rs4134897 | NP_620835 | C | S | CS | probably damaging |
| rs4134897 | NP_647476 | C | S | CS | probably damaging |
| rs4134973 | NP_001940 | G | R | GR | possibly damaging |
| rs4134982 | NP_001940 | D | N | DN | benign            |
| rs4135010 | NP_001245 | T | A | TA | benign            |
| rs4135012 | NP_001245 | D | N | DN | benign            |
| rs4135013 | NP_001245 | T | M | TM | possibly damaging |
| rs4135016 | NP_001245 | R | H | RH | possibly damaging |
| rs4135113 | NP_003202 | G | S | GS | possibly damaging |
| rs4135384 | NP_001895 | M | V | MV | benign            |
| rs4140446 | NP_055426 | S | N | SN | benign            |
| rs4140555 | NP_476503 | Y | S | YS | probably damaging |
| rs4140555 | NP_061990 | Y | S | YS | probably damaging |
| rs4140966 | NP_003259 | F | L | FL | benign            |
| rs4140968 | NP_076411 | I | V | IV | benign            |
| rs4141691 | XP_291170 | Q | R | QR | benign            |
| rs4141841 | NP_113689 | A | V | AV | benign            |
| rs4141841 | NP_061731 | A | V | AV | benign            |
| rs4142048 | NP_071412 | H | R | HR | benign            |
| rs4142867 | NP_085079 | D | E | DE | possibly damaging |
| rs4142867 | NP_000755 | D | E | DE | possibly damaging |
| rs4143218 | NP_694962 | S | T | ST | benign            |
| rs4143221 | NP_573440 | P | T | PT | probably damaging |
| rs4143307 | NP_058628 | A | G | AG | benign            |
| rs4143455 | NP_061761 | V | M | VM | benign            |
| rs4143582 | XP_498461 | F | L | FL | benign            |
| rs4143582 | XP_496929 | F | L | FL | benign            |
| rs4143585 | NP_699194 | T | A | TA | benign            |
| rs4143586 | NP_699194 | I | T | IT | benign            |
| rs4143653 | NP_006855 | R | H | RH | benign            |
| rs4143752 | NP_000417 | K | Q | KQ | benign            |
| rs4144164 | NP_059117 | H | Y | HY | possibly damaging |

|           |           |   |   |    |                   |
|-----------|-----------|---|---|----|-------------------|
| rs4144691 | NP_997400 | V | L | VL | benign            |
| rs4144901 | NP_002510 | L | F | LF | benign            |
| rs4145046 | NP_005458 | N | H | NH | possibly damaging |
| rs4145257 | NP_055310 | N | Y | NY | possibly damaging |
| rs4145748 | NP_852478 | T | M | TM | benign            |
| rs4145756 | NP_060098 | A | G | AG | benign            |
| rs4145854 | XP_372535 | F | V | FV | possibly damaging |
| rs4145944 | NP_065186 | S | T | ST | benign            |
| rs4146129 | NP_631895 | N | K | NK | possibly damaging |
| rs4146129 | NP_004028 | N | K | NK | possibly damaging |
| rs4146577 | NP_000935 | K | Q | KQ | possibly damaging |
| rs4146960 | NP_689786 | R | C | RC | benign            |
| rs4147558 | NP_005785 | A | T | AT | benign            |
| rs4147558 | NP_878912 | A | T | AT | benign            |
| rs4147617 | NP_001503 | T | A | TA | benign            |
| rs4147630 | NP_004533 | L | V | LV | benign            |
| rs4147793 | NP_002483 | Y | H | YH | possibly damaging |
| rs4147918 | NP_150651 | Q | R | QR | benign            |
| rs4147918 | NP_061985 | Q | R | QR | benign            |
| rs4147934 | NP_150651 | S | A | SA | benign            |
| rs4147934 | NP_061985 | S | A | SA | benign            |
| rs4147979 | NP_009099 | G | S | GS | benign            |
| rs4148077 | NP_064730 | A | T | AT | benign            |
| rs4148077 | NP_064731 | A | T | AT | benign            |
| rs4148077 | NP_064720 | A | T | AT | benign            |
| rs4148211 | NP_071882 | Y | C | YC | probably damaging |
| rs4148217 | NP_071882 | T | K | TK | possibly damaging |
| rs4148254 | NP_003351 | P | L | PL | probably damaging |
| rs4148269 | NP_001067 | T | K | TK | possibly damaging |
| rs4148301 | NP_006789 | G | R | GR | probably damaging |
| rs4148304 | NP_006789 | V | I | VI | benign            |
| rs4148323 | NP_000454 | G | R | GR | benign            |
| rs4148356 | NP_063953 | R | Q | RQ | benign            |
| rs4148356 | NP_063955 | R | Q | RQ | benign            |
| rs4148356 | NP_063956 | R | Q | RQ | benign            |
| rs4148356 | NP_063957 | R | Q | RQ | benign            |
| rs4148356 | NP_004987 | R | Q | RQ | benign            |
| rs4148400 | NP_000383 | K | Q | KQ | benign            |
| rs4148460 | NP_005836 | C | G | CG | probably damaging |
| rs4148619 | NP_000343 | V | M | VM | benign            |
| rs4148725 | NP_000483 | R | W | RW | probably damaging |
| rs4148756 | NP_036221 | A | S | AS | benign            |
| rs4148844 | NP_009119 | V | I | VI | benign            |
| rs4148873 | NP_000535 | I | V | IV | benign            |
| rs4148873 | NP_061313 | I | V | IV | benign            |
| rs4148876 | NP_000535 | R | C | RC | possibly damaging |

|           |           |   |   |    |                   |
|-----------|-----------|---|---|----|-------------------|
| rs4148880 | NP_000584 | I | V | IV | benign            |
| rs4149056 | NP_006437 | V | A | VA | possibly damaging |
| rs4149117 | NP_062818 | S | A | SA | benign            |
| rs4149251 | NP_001970 | S | I | SI | benign            |
| rs4149313 | NP_005493 | I | M | IM | benign            |
| rs4149416 | NP_055280 | E | D | ED | benign            |
| rs4149584 | NP_001056 | R | Q | RQ | benign            |
| rs4149637 | NP_001056 | P | L | PL | probably damaging |
| rs4149751 | NP_000124 | T | P | TP | possibly damaging |
| rs4149796 | NP_004194 | R | C | RC | possibly damaging |
| rs4149796 | NP_872629 | R | C | RC | probably damaging |
| rs4149800 | NP_004194 | P | R | PR | probably damaging |
| rs4149839 | NP_006770 | N | S | NS | benign            |
| rs4149864 | NP_003677 | V | I | VI | benign            |
| rs4149864 | NP_569082 | V | I | VI | benign            |
| rs4149865 | NP_003677 | R | G | RG | probably damaging |
| rs4149865 | NP_569082 | R | G | RG | probably damaging |
| rs4149909 | NP_569082 | N | S | NS | benign            |
| rs4149909 | NP_003677 | N | S | NS | possibly damaging |
| rs4149910 | NP_569082 | N | S | NS | benign            |
| rs4149910 | NP_003677 | N | S | NS | possibly damaging |
| rs4149962 | NP_003677 | D | N | DN | benign            |
| rs4149962 | NP_569082 | D | N | DN | benign            |
| rs4149963 | NP_003677 | T | M | TM | benign            |
| rs4149963 | NP_569082 | T | M | TM | benign            |
| rs4149964 | NP_003677 | S | Y | SY | possibly damaging |
| rs4149964 | NP_569082 | S | Y | SY | possibly damaging |
| rs4149965 | NP_003677 | V | M | VM | benign            |
| rs4149965 | NP_569082 | V | M | VM | benign            |
| rs4149966 | NP_003677 | V | L | VL | benign            |
| rs4149966 | NP_569082 | V | L | VL | benign            |
| rs4149967 | NP_569082 | R | T | RT | possibly damaging |
| rs4149967 | NP_003677 | R | T | RT | probably damaging |
| rs4149978 | NP_003677 | R | Q | RQ | benign            |
| rs4149978 | NP_569082 | R | Q | RQ | benign            |
| rs4150001 | NP_003677 | G | E | GE | benign            |
| rs4150001 | NP_569082 | G | E | GE | benign            |
| rs4150050 | NP_004345 | L | V | LV | benign            |
| rs4150051 | NP_004345 | E | G | EG | possibly damaging |
| rs4150147 | NP_647610 | R | H | RH | benign            |
| rs4150147 | NP_005670 | R | H | RH | possibly damaging |
| rs4150151 | NP_647610 | S | L | SL | benign            |
| rs4150151 | NP_005670 | S | L | SL | possibly damaging |
| rs4150165 | NP_647610 | H | Y | HY | possibly damaging |
| rs4150165 | NP_005670 | H | Y | HY | possibly damaging |
| rs4150167 | NP_647610 | G | R | GR | possibly damaging |

|           |           |   |   |    |                   |
|-----------|-----------|---|---|----|-------------------|
| rs4150167 | NP_005670 | G | R | GR | probably damaging |
| rs4150170 | NP_647610 | P | L | PL | benign            |
| rs4150170 | NP_005670 | P | L | PL | possibly damaging |
| rs4150172 | NP_647610 | A | G | AG | benign            |
| rs4150172 | NP_005670 | A | G | AG | benign            |
| rs4150173 | NP_647610 | G | S | GS | benign            |
| rs4150175 | NP_647610 | T | M | TM | benign            |
| rs4150175 | NP_005670 | T | M | TM | benign            |
| rs4150176 | NP_647610 | R | H | RH | benign            |
| rs4150176 | NP_005670 | R | H | RH | possibly damaging |
| rs4150187 | NP_848547 | P | A | PA | possibly damaging |
| rs4150188 | NP_848547 | G | R | GR | possibly damaging |
| rs4150295 | NP_000114 | H | R | HR | possibly damaging |
| rs4150313 | NP_000114 | Q | R | QR | possibly damaging |
| rs4150315 | NP_000114 | E | K | EK | benign            |
| rs4150318 | NP_000114 | V | I | VI | benign            |
| rs4150319 | NP_000114 | V | L | VL | benign            |
| rs4150342 | NP_000114 | N | S | NS | benign            |
| rs4150387 | NP_000114 | R | H | RH | probably damaging |
| rs4150521 | NP_000113 | S | L | SL | possibly damaging |
| rs4150522 | NP_000113 | S | P | SP | benign            |
| rs4150603 | NP_005307 | R | W | RW | probably damaging |
| rs4150636 | NP_005307 | S | F | SF | possibly damaging |
| rs4150665 | NP_005307 | L | V | LV | benign            |
| rs4151027 | NP_000439 | S | L | SL | benign            |
| rs4151029 | NP_000439 | R | H | RH | possibly damaging |
| rs4151030 | NP_000439 | D | E | DE | benign            |
| rs4151031 | NP_000439 | R | K | RK | benign            |
| rs4151032 | NP_000439 | P | S | PS | benign            |
| rs4151033 | NP_000439 | E | K | EK | benign            |
| rs4151034 | NP_000439 | D | N | DN | benign            |
| rs4151060 | NP_003930 | A | S | AS | benign            |
| rs4151060 | NP_378663 | A | S | AS | benign            |
| rs4151131 | NP_004103 | R | C | RC | probably damaging |
| rs4151534 | NP_000312 | Q | K | QK | probably damaging |
| rs4151539 | NP_000312 | A | G | AG | benign            |
| rs4151553 | NP_005758 | C | W | CW | possibly damaging |
| rs4151643 | NP_620419 | R | W | RW | probably damaging |
| rs4151648 | NP_000054 | R | C | RC | probably damaging |
| rs4151651 | NP_001701 | G | S | GS | benign            |
| rs4151659 | NP_001701 | K | E | KE | benign            |
| rs4151660 | NP_001701 | D | E | DE | benign            |
| rs4151667 | NP_001701 | L | H | LH | possibly damaging |
| rs4233046 | XP_060417 | H | R | HR | benign            |
| rs4233046 | XP_372840 | R | H | RH | possibly damaging |
| rs4233050 | NP_689585 | T | M | TM | benign            |

|           |           |   |   |    |                   |
|-----------|-----------|---|---|----|-------------------|
| rs4233367 | NP_005090 | R | Q | RQ | benign            |
| rs4233507 | NP_000769 | S | F | SF | benign            |
| rs4235127 | NP_444267 | L | H | LH | probably damaging |
| rs4235380 | XP_209656 | S | N | SN | benign            |
| rs4236176 | NP_872358 | L | P | LP | possibly damaging |
| rs4236203 | NP_006515 | Y | F | YF | probably damaging |
| rs4236655 | NP_848658 | Q | E | QE | benign            |
| rs4237768 | XP_291977 | W | R | WR | possibly damaging |
| rs4238001 | NP_005496 | G | S | GS | possibly damaging |
| rs4238485 | NP_064596 | E | D | ED | benign            |
| rs4239022 | NP_004198 | P | Q | PQ | benign            |
| rs4239529 | NP_037530 | H | L | HL | benign            |
| rs4239540 | NP_115528 | V | F | VF | benign            |
| rs4239541 | NP_115528 | P | Q | PQ | benign            |
| rs4239550 | NP_005806 | K | N | KN | benign            |
| rs4239634 | XP_038604 | L | P | LP | benign            |
| rs4241069 | XP_496691 | E | K | EK | benign            |
| rs4241344 | XP_376060 | R | S | RS | benign            |
| rs4242182 | NP_002440 | M | T | MT | benign            |
| rs4242746 | NP_055704 | I | V | IV | benign            |
| rs4244171 | XP_372825 | R | G | RG | benign            |
| rs4244355 | NP_003569 | A | T | AT | benign            |
| rs4245191 | NP_733840 | A | E | AE | benign            |
| rs4245191 | NP_078894 | A | E | AE | benign            |
| rs4245219 | XP_166918 | E | D | ED | benign            |
| rs4245575 | NP_056226 | E | D | ED | benign            |
| rs4247303 | NP_006455 | R | W | RW | possibly damaging |
| rs4247475 | XP_372094 | S | N | SN | benign            |
| rs4247594 | XP_171032 | E | K | EK | benign            |
| rs4247667 | XP_495821 | Q | R | QR | benign            |
| rs4247892 | XP_496692 | S | I | SI | benign            |
| rs4248781 | XP_208847 | G | D | GD | possibly damaging |
| rs4248781 | XP_497431 | G | D | GD | possibly damaging |
| rs4248782 | XP_497431 | M | L | ML | benign            |
| rs4248782 | XP_208847 | M | L | ML | possibly damaging |
| rs4248794 | XP_380107 | A | S | AS | benign            |
| rs4251469 | NP_057207 | S | R | SR | benign            |
| rs4251545 | NP_057207 | A | T | AT | benign            |
| rs4251583 | NP_057207 | H | R | HR | possibly damaging |
| rs4251813 | NP_002650 | E | G | EG | probably damaging |
| rs4251878 | NP_002650 | R | Q | RQ | probably damaging |
| rs4251921 | NP_002650 | N | K | NK | benign            |
| rs4252070 | NP_000292 | E | K | EK | benign            |
| rs4252119 | NP_000292 | R | W | RW | benign            |
| rs4252125 | NP_000292 | D | N | DN | benign            |
| rs4252128 | NP_000292 | A | V | AV | benign            |

|           |           |   |   |    |                   |
|-----------|-----------|---|---|----|-------------------|
| rs4252129 | NP_000292 | R | W | RW | benign            |
| rs4252186 | NP_000292 | H | Q | HQ | probably damaging |
| rs4252187 | NP_000292 | R | H | RH | possibly damaging |
| rs4252233 | NP_003178 | T | M | TM | probably damaging |
| rs4252250 | NP_001549 | L | V | LV | benign            |
| rs4252272 | NP_001549 | S | G | SG | benign            |
| rs4252273 | NP_001549 | R | Q | RQ | benign            |
| rs4252303 | NP_001549 | V | I | VI | benign            |
| rs4252315 | NP_003230 | T | M | TM | benign            |
| rs4252499 | NP_062815 | A | T | AT | benign            |
| rs4252509 | NP_062815 | L | F | LF | benign            |
| rs4252548 | NP_000632 | R | H | RH | benign            |
| rs4252576 | NP_000632 | V | M | VM | benign            |
| rs4252589 | NP_001532 | G | S | GS | benign            |
| rs4252633 | NP_004439 | W | C | WC | probably damaging |
| rs4252716 | NP_002384 | I | T | IT | benign            |
| rs4252741 | NP_002384 | T | I | TI | benign            |
| rs4252903 | NP_006826 | V | I | VI | benign            |
| rs4253046 | NP_000115 | D | A | DA | possibly damaging |
| rs4253072 | NP_736609 | K | R | KR | benign            |
| rs4253199 | NP_000115 | T | M | TM | possibly damaging |
| rs4253206 | NP_000115 | Y | C | YC | probably damaging |
| rs4253208 | NP_000115 | P | R | PR | possibly damaging |
| rs4253211 | NP_000115 | R | P | RP | possibly damaging |
| rs4253218 | NP_000115 | V | L | VL | benign            |
| rs4253219 | NP_000115 | G | V | GV | possibly damaging |
| rs4253227 | NP_000115 | G | R | GR | probably damaging |
| rs4253228 | NP_000115 | G | R | GR | benign            |
| rs4253229 | NP_000115 | G | R | GR | benign            |
| rs4253230 | NP_000115 | T | I | TI | benign            |
| rs4253257 | NP_000883 | A | T | AT | benign            |
| rs4253301 | NP_000883 | S | A | SA | benign            |
| rs4253316 | NP_000883 | Q | P | QP | probably damaging |
| rs4253325 | NP_000883 | R | Q | RQ | benign            |
| rs4253373 | NP_000883 | H | Q | HQ | benign            |
| rs4253376 | NP_000883 | S | C | SC | benign            |
| rs4253377 | NP_000883 | F | V | FV | possibly damaging |
| rs4253379 | NP_000883 | T | A | TA | possibly damaging |
| rs4253440 | NP_005185 | G | S | GS | benign            |
| rs4253527 | NP_005402 | R | W | RW | probably damaging |
| rs4253886 | NP_115612 | S | C | SC | benign            |
| rs4254075 | NP_958831 | L | I | LI | benign            |
| rs4255378 | NP_872626 | D | V | DV | benign            |
| rs4255378 | NP_004419 | D | V | DV | benign            |
| rs4255412 | NP_003813 | E | K | EK | benign            |
| rs4255412 | NP_995582 | E | K | EK | benign            |



|           |           |   |   |    |                   |
|-----------|-----------|---|---|----|-------------------|
| rs4255614 | NP_060918 | R | K | RK | benign            |
| rs4261099 | XP_375747 | R | C | RC | benign            |
| rs4261239 | NP_055568 | Q | E | QE | benign            |
| rs4262421 | XP_496691 | E | D | ED | benign            |
| rs4262766 | NP_001908 | G | V | GV | probably damaging |
| rs4263028 | NP_116038 | V | I | VI | benign            |
| rs4263741 | NP_689778 | E | K | EK | benign            |
| rs4264113 | NP_065071 | E | D | ED | benign            |
| rs4264326 | XP_290629 | V | A | VA | benign            |
| rs4267245 | NP_079010 | V | A | VA | benign            |
| rs4267686 | NP_937870 | Q | H | QH | benign            |
| rs4267686 | NP_940832 | Q | H | QH | benign            |
| rs4267686 | NP_937873 | Q | H | QH | benign            |
| rs4267943 | NP_060602 | G | R | GR | benign            |
| rs4270749 | NP_114040 | A | V | AV | benign            |
| rs4270749 | NP_054724 | A | V | AV | benign            |
| rs4270749 | NP_061733 | A | V | AV | benign            |
| rs4270749 | NP_114063 | A | V | AV | benign            |
| rs4270973 | XP_209910 | T | M | TM | benign            |
| rs4272284 | NP_733751 | V | L | VL | benign            |
| rs4272533 | NP_775794 | A | V | AV | benign            |
| rs4272592 | NP_031378 | Q | L | QL | benign            |
| rs4272658 | NP_005637 | H | P | HP | probably damaging |
| rs4272850 | XP_044062 | V | I | VI | benign            |
| rs4273935 | NP_056207 | M | L | ML | benign            |
| rs4274008 | NP_997239 | R | T | RT | benign            |
| rs4274188 | NP_473372 | D | N | DN | benign            |
| rs4274349 | XP_170749 | R | T | RT | benign            |
| rs4275364 | NP_055311 | H | P | HP | probably damaging |
| rs4277274 | NP_004443 | D | Y | DY | possibly damaging |
| rs4278369 | NP_006608 | V | A | VA | benign            |
| rs4279156 | XP_094074 | E | K | EK | benign            |
| rs4280046 | NP_005752 | S | Y | SY | benign            |
| rs4280164 | NP_777573 | S | N | SN | benign            |
| rs4280359 | NP_037512 | F | L | FL | benign            |
| rs4282140 | XP_496692 | P | T | PT | possibly damaging |
| rs4282800 | XP_375747 | V | D | VD | benign            |
| rs4283414 | XP_051221 | G | R | GR | benign            |
| rs4284020 | NP_060877 | Y | H | YH | possibly damaging |
| rs4284686 | NP_064706 | L | M | LM | benign            |
| rs4285708 | XP_291396 | K | T | KT | benign            |
| rs4285708 | XP_496345 | K | T | KT | benign            |
| rs4285727 | XP_498755 | N | K | NK | benign            |
| rs4286866 | XP_069623 | S | A | SA | possibly damaging |
| rs4287607 | NP_065838 | S | L | SL | benign            |
| rs4287691 | XP_375639 | V | L | VL | benign            |

|           |           |   |   |    |                   |
|-----------|-----------|---|---|----|-------------------|
| rs4288756 | XP_290517 | Q | H | QH | benign            |
| rs4289289 | NP_037488 | W | R | WR | benign            |
| rs4289320 | NP_055197 | E | K | EK | possibly damaging |
| rs4289924 | XP_376866 | M | V | MV | benign            |
| rs4289924 | XP_372110 | M | V | MV | benign            |
| rs4290234 | NP_620060 | H | P | HP | probably damaging |
| rs4290234 | NP_620063 | H | P | HP | probably damaging |
| rs4290234 | NP_055895 | H | P | HP | probably damaging |
| rs4291471 | NP_115640 | H | Q | HQ | possibly damaging |
| rs4292082 | NP_065986 | S | L | SL | benign            |
| rs4292261 | XP_496642 | M | L | ML | benign            |
| rs4294502 | NP_660153 | N | D | ND | benign            |
| rs4294894 | NP_079490 | D | Y | DY | probably damaging |
| rs4295930 | XP_372789 | D | G | DG | possibly damaging |
| rs4296098 | NP_115606 | K | Q | KQ | benign            |
| rs4297482 | XP_373413 | S | A | SA | benign            |
| rs4298923 | XP_497298 | M | T | MT | benign            |
| rs4299243 | NP_005248 | H | N | HN | possibly damaging |
| rs4299484 | XP_036988 | R | Q | RQ | benign            |
| rs4300683 | NP_002539 | T | I | TI | possibly damaging |
| rs4301615 | NP_003166 | H | D | HD | benign            |
| rs4301642 | XP_497650 | G | R | GR | possibly damaging |
| rs4301822 | NP_001629 | I | T | IT | benign            |
| rs4302261 | XP_372958 | T | M | TM | benign            |
| rs4302324 | NP_054858 | M | R | MR | probably damaging |
| rs4302331 | NP_000395 | R | C | RC | possibly damaging |
| rs4303121 | NP_899228 | H | Q | HQ | benign            |
| rs4304271 | NP_002702 | E | K | EK | benign            |
| rs4304840 | NP_525126 | S | G | SG | benign            |
| rs4306647 | NP_060322 | R | K | RK | benign            |
| rs4307514 | NP_671726 | A | T | AT | benign            |
| rs4307515 | XP_378185 | S | T | ST | benign            |
| rs4307536 | NP_036556 | D | V | DV | probably damaging |
| rs4307581 | XP_497650 | D | H | DH | probably damaging |
| rs4308917 | XP_372755 | A | P | AP | benign            |
| rs4309825 | XP_114415 | M | T | MT | probably damaging |
| rs4310744 | XP_372494 | M | V | MV | benign            |
| rs4311877 | NP_057081 | L | V | LV | benign            |
| rs4313620 | NP_002275 | S | T | ST | benign            |
| rs4317244 | NP_859077 | T | S | TS | benign            |
| rs4318060 | XP_171581 | S | L | SL | benign            |
| rs4320729 | NP_689585 | R | G | RG | possibly damaging |
| rs4320994 | NP_005752 | P | L | PL | probably damaging |
| rs4321984 | NP_006412 | D | Y | DY | benign            |
| rs4322205 | NP_002591 | E | K | EK | probably damaging |
| rs4322271 | XP_294997 | G | R | GR | probably damaging |

|           |           |   |   |    |                   |
|-----------|-----------|---|---|----|-------------------|
| rs4323045 | NP_000194 | A | G | AG | benign            |
| rs4323587 | XP_379639 | G | R | GR | benign            |
| rs4323587 | XP_499140 | L | F | LF | benign            |
| rs4323608 | NP_076987 | S | N | SN | possibly damaging |
| rs4323722 | XP_497650 | S | C | SC | probably damaging |
| rs4323762 | NP_899228 | L | V | LV | benign            |
| rs4326682 | XP_372789 | D | G | DG | possibly damaging |
| rs4327235 | NP_004534 | P | L | PL | probably damaging |
| rs4327858 | XP_498284 | L | F | LF | benign            |
| rs4329068 | NP_114442 | R | K | RK | benign            |
| rs4329068 | NP_061740 | R | K | RK | possibly damaging |
| rs4329510 | NP_067012 | V | G | VG | possibly damaging |
| rs4329708 | NP_689929 | S | R | SR | benign            |
| rs4331613 | NP_203744 | Q | H | QH | possibly damaging |
| rs4332350 | NP_663320 | R | L | RL | benign            |
| rs4332566 | NP_003796 | L | I | LI | benign            |
| rs4332885 | XP_497894 | E | K | EK | benign            |
| rs4335271 | NP_665801 | R | W | RW | probably damaging |
| rs4335271 | NP_665799 | R | W | RW | probably damaging |
| rs4339026 | NP_872325 | D | G | DG | possibly damaging |
| rs4340274 | NP_004571 | L | F | LF | possibly damaging |
| rs4340274 | NP_899057 | L | F | LF | possibly damaging |
| rs4340274 | NP_899058 | L | F | LF | possibly damaging |
| rs4340274 | NP_899059 | L | F | LF | possibly damaging |
| rs4340795 | NP_938019 | V | I | VI | benign            |
| rs4341168 | XP_209910 | L | F | LF | benign            |
| rs4341770 | NP_001162 | V | A | VA | benign            |
| rs4342887 | NP_006836 | L | I | LI | benign            |
| rs4343826 | NP_000834 | V | G | VG | probably damaging |
| rs4345105 | NP_001598 | L | M | LM | benign            |
| rs4345976 | NP_006380 | A | S | AS | benign            |
| rs4348947 | NP_006154 | R | P | RP | possibly damaging |
| rs4349559 | XP_373038 | R | K | RK | benign            |
| rs4349946 | XP_047083 | C | R | CR | probably damaging |
| rs4350211 | NP_075390 | F | L | FL | benign            |
| rs4351743 | NP_057253 | D | A | DA | probably damaging |
| rs4351862 | NP_056150 | S | F | SF | possibly damaging |
| rs4353120 | XP_498755 | Y | D | YD | benign            |
| rs4354242 | NP_942150 | L | V | LV | benign            |
| rs4354673 | XP_291977 | K | T | KT | benign            |
| rs4354909 | XP_031706 | Y | S | YS | probably damaging |
| rs4356090 | XP_497745 | A | G | AG | benign            |
| rs4356110 | XP_496394 | F | L | FL | benign            |
| rs4356288 | NP_109592 | S | R | SR | benign            |
| rs4356288 | NP_002839 | S | R | SR | benign            |
| rs4356288 | NP_109596 | S | R | SR | benign            |

|           |           |   |   |    |                   |
|-----------|-----------|---|---|----|-------------------|
| rs4356288 | NP_109595 | S | R | SR | possibly damaging |
| rs4356408 | NP_060843 | V | I | VI | benign            |
| rs4356851 | NP_078789 | S | L | SL | benign            |
| rs4357719 | XP_372366 | I | V | IV | benign            |
| rs4358188 | NP_001716 | K | E | KE | benign            |
| rs4358434 | XP_373027 | G | S | GS | possibly damaging |
| rs4359840 | NP_004059 | K | N | KN | benign            |
| rs4360492 | NP_002817 | R | M | RM | possibly damaging |
| rs4361282 | XP_114303 | E | D | ED | benign            |
| rs4362017 | XP_291439 | A | S | AS | benign            |
| rs4362100 | XP_495821 | E | K | EK | benign            |
| rs4362101 | XP_495821 | D | E | DE | benign            |
| rs4362173 | XP_372366 | I | V | IV | benign            |
| rs4362296 | XP_058661 | Y | N | YN | probably damaging |
| rs4362322 | XP_040910 | Q | E | QE | benign            |
| rs4362589 | NP_000375 | I | L | IL | benign            |
| rs4363527 | NP_004184 | E | G | EG | possibly damaging |
| rs4363911 | NP_004095 | S | F | SF | possibly damaging |
| rs4365474 | NP_775916 | Q | L | QL | possibly damaging |
| rs4365833 | NP_001438 | G | V | GV | probably damaging |
| rs4366124 | XP_372097 | A | T | AT | benign            |
| rs4366124 | XP_372090 | A | T | AT | possibly damaging |
| rs4366679 | NP_997238 | A | T | AT | benign            |
| rs4367963 | NP_006628 | L | S | LS | possibly damaging |
| rs4369319 | NP_660203 | R | H | RH | benign            |
| rs4369632 | XP_370837 | K | T | KT | benign            |
| rs4369632 | XP_370917 | K | T | KT | benign            |
| rs4369791 | NP_996777 | T | S | TS | benign            |
| rs4369876 | NP_002968 | V | L | VL | benign            |
| rs4370558 | NP_004736 | Q | L | QL | probably damaging |
| rs4370606 | NP_065975 | D | Y | DY | possibly damaging |
| rs4371546 | NP_733762 | P | S | PS | probably damaging |
| rs4371716 | NP_004052 | V | M | VM | probably damaging |
| rs4372733 | NP_002463 | E | G | EG | probably damaging |
| rs4373715 | NP_061486 | S | I | SI | possibly damaging |
| rs4373715 | NP_005553 | S | I | SI | possibly damaging |
| rs4373753 | NP_004714 | E | K | EK | benign            |
| rs4375699 | NP_055380 | H | R | HR | possibly damaging |
| rs4375725 | NP_061184 | M | L | ML | possibly damaging |
| rs4378003 | NP_116291 | T | A | TA | benign            |
| rs4378600 | NP_113651 | C | S | CS | benign            |
| rs4379511 | XP_208403 | M | V | MV | benign            |
| rs4379869 | NP_060837 | I | V | IV | benign            |
| rs4380102 | NP_000517 | D | Y | DY | probably damaging |
| rs4381168 | NP_065173 | K | N | KN | benign            |
| rs4381906 | NP_036228 | A | V | AV | benign            |

|           |           |   |   |    |                   |
|-----------|-----------|---|---|----|-------------------|
| rs4382952 | NP_006567 | A | P | AP | benign            |
| rs4383384 | NP_060549 | R | K | RK | benign            |
| rs4384236 | XP_372763 | R | P | RP | probably damaging |
| rs4384262 | XP_291485 | R | C | RC | probably damaging |
| rs4384572 | NP_871629 | G | S | GS | possibly damaging |
| rs4387080 | XP_372108 | L | R | LR | possibly damaging |
| rs4387520 | NP_057334 | S | Y | SY | benign            |
| rs4387520 | NP_963294 | S | Y | SY | benign            |
| rs4387520 | NP_963832 | S | Y | SY | benign            |
| rs4387520 | NP_963835 | S | Y | SY | benign            |
| rs4387520 | NP_963834 | S | Y | SY | benign            |
| rs4387696 | NP_002772 | N | K | NK | possibly damaging |
| rs4388488 | NP_570901 | P | Q | PQ | benign            |
| rs4389105 | NP_997238 | Y | H | YH | possibly damaging |
| rs4389403 | XP_066243 | A | T | AT | benign            |
| rs4389841 | XP_376720 | R | Q | RQ | benign            |
| rs4390302 | NP_008886 | E | G | EG | possibly damaging |
| rs4391498 | NP_066929 | D | Y | DY | possibly damaging |
| rs4391498 | NP_570613 | D | Y | DY | possibly damaging |
| rs4391660 | XP_372763 | V | M | VM | possibly damaging |
| rs4391795 | XP_171536 | G | S | GS | benign            |
| rs4393101 | NP_689585 | G | D | GD | possibly damaging |
| rs4396808 | NP_056520 | T | I | TI | possibly damaging |
| rs4397384 | NP_006260 | L | I | LI | benign            |
| rs4398144 | XP_496215 | C | R | CR | probably damaging |
| rs4398252 | NP_000095 | M | V | MV | benign            |
| rs4399118 | NP_055440 | P | L | PL | probably damaging |
| rs4399146 | NP_004485 | P | L | PL | probably damaging |
| rs4399578 | XP_496215 | Q | E | QE | benign            |
| rs4399954 | XP_496692 | D | A | DA | possibly damaging |
| rs4400031 | XP_371717 | T | A | TA | benign            |
| rs4400752 | XP_495821 | H | Q | HQ | possibly damaging |
| rs4400753 | XP_495821 | H | D | HD | benign            |
| rs4401027 | XP_496026 | T | K | TK | possibly damaging |
| rs4402458 | NP_004265 | D | H | DH | benign            |
| rs4402461 | NP_009123 | M | L | ML | benign            |
| rs4402951 | NP_653234 | I | N | IN | possibly damaging |
| rs4403594 | NP_660281 | D | Y | DY | probably damaging |
| rs4404044 | XP_496026 | N | D | ND | benign            |
| rs4405289 | XP_171536 | P | L | PL | benign            |
| rs4406360 | NP_940866 | V | A | VA | benign            |
| rs4408324 | NP_061928 | R | Q | RQ | benign            |
| rs4408370 | NP_778203 | R | Q | RQ | possibly damaging |
| rs4408370 | NP_001834 | R | Q | RQ | possibly damaging |
| rs4409714 | XP_496394 | K | N | KN | benign            |
| rs4410141 | NP_004685 | E | V | EV | possibly damaging |

|           |           |   |   |    |                   |
|-----------|-----------|---|---|----|-------------------|
| rs4410209 | NP_038475 | T | I | TI | benign            |
| rs4410209 | NP_690880 | T | I | TI | benign            |
| rs4410209 | NP_690881 | T | I | TI | benign            |
| rs4410209 | NP_690882 | T | I | TI | benign            |
| rs4410209 | NP_690883 | T | I | TI | benign            |
| rs4410209 | NP_690884 | T | I | TI | benign            |
| rs4410209 | NP_690885 | T | I | TI | benign            |
| rs4410254 | NP_004396 | S | Y | SY | possibly damaging |
| rs4410755 | NP_003560 | T | P | TP | benign            |
| rs4412715 | XP_495821 | L | P | LP | probably damaging |
| rs4412838 | XP_165533 | L | V | LV | benign            |
| rs4412904 | XP_497390 | G | S | GS | benign            |
| rs4414223 | XP_374949 | N | S | NS | benign            |
| rs4415545 | XP_375747 | A | G | AG | benign            |
| rs4415972 | NP_570971 | S | G | SG | benign            |
| rs4418164 | NP_079083 | G | C | GC | probably damaging |
| rs4418594 | XP_086604 | R | H | RH | benign            |
| rs4418693 | XP_374768 | K | I | KI | probably damaging |
| rs4418847 | NP_997313 | P | A | PA | benign            |
| rs4419053 | NP_116219 | A | D | AD | possibly damaging |
| rs4419104 | NP_003623 | P | R | PR | probably damaging |
| rs4419118 | NP_071351 | W | C | WC | probably damaging |
| rs4419794 | NP_620172 | R | K | RK | benign            |
| rs4421686 | XP_089747 | L | M | LM | benign            |
| rs4422143 | NP_000618 | A | V | AV | benign            |
| rs4422143 | NP_996826 | A | V | AV | benign            |
| rs4422842 | NP_000709 | N | K | NK | possibly damaging |
| rs4424934 | NP_001788 | M | I | MI | benign            |
| rs4424934 | NP_387513 | M | I | MI | benign            |
| rs4425183 | XP_496493 | A | S | AS | benign            |
| rs4426333 | NP_055733 | Q | H | QH | benign            |
| rs4426527 | NP_000021 | I | M | IM | benign            |
| rs4427454 | NP_060592 | L | V | LV | benign            |
| rs4427935 | NP_694953 | S | R | SR | possibly damaging |
| rs4429251 | NP_997238 | T | K | TK | benign            |
| rs4429342 | NP_114140 | L | F | LF | benign            |
| rs4429421 | NP_073728 | V | I | VI | benign            |
| rs4430169 | NP_066934 | A | P | AP | benign            |
| rs4430386 | NP_899228 | R | Q | RQ | benign            |
| rs4430553 | NP_387467 | L | P | LP | possibly damaging |
| rs4430994 | XP_372958 | E | K | EK | benign            |
| rs4433454 | XP_372789 | A | V | AV | benign            |
| rs4433943 | NP_001866 | D | V | DV | probably damaging |
| rs4434123 | XP_210562 | T | I | TI | benign            |
| rs4434138 | NP_055951 | V | I | VI | benign            |
| rs4435385 | NP_112495 | T | S | TS | benign            |

|           |           |   |   |    |                   |
|-----------|-----------|---|---|----|-------------------|
| rs4435957 | NP_006611 | G | S | GS | benign            |
| rs4436392 | NP_066014 | E | Q | EQ | benign            |
| rs4436524 | XP_291977 | C | R | CR | possibly damaging |
| rs4436525 | XP_291977 | C | R | CR | possibly damaging |
| rs4437065 | NP_067585 | K | T | KT | benign            |
| rs4437065 | NP_004318 | K | T | KT | benign            |
| rs4437756 | NP_055105 | V | L | VL | benign            |
| rs4438413 | XP_375646 | D | N | DN | possibly damaging |
| rs4440563 | NP_938007 | D | N | DN | benign            |
| rs4440563 | NP_938008 | D | N | DN | benign            |
| rs4440563 | NP_061944 | D | N | DN | benign            |
| rs4440668 | NP_006188 | L | V | LV | benign            |
| rs4440844 | NP_004691 | V | G | VG | possibly damaging |
| rs4440844 | NP_751895 | V | G | VG | possibly damaging |
| rs4443061 | NP_689470 | I | N | IN | possibly damaging |
| rs4443674 | XP_372040 | F | L | FL | benign            |
| rs4444599 | XP_496260 | I | T | IT | benign            |
| rs4447061 | XP_166140 | P | S | PS | probably damaging |
| rs4447263 | NP_116045 | R | Q | RQ | benign            |
| rs4448319 | NP_038460 | V | M | VM | possibly damaging |
| rs4448516 | NP_066014 | R | P | RP | possibly damaging |
| rs4448627 | NP_078964 | A | G | AG | benign            |
| rs4449373 | NP_002090 | A | E | AE | benign            |
| rs4450447 | NP_777547 | R | W | RW | possibly damaging |
| rs4451341 | NP_116291 | E | Q | EQ | benign            |
| rs4452075 | XP_030378 | H | R | HR | possibly damaging |
| rs4453052 | XP_497650 | H | N | HN | benign            |
| rs4453975 | NP_078905 | E | Q | EQ | benign            |
| rs4454970 | NP_060309 | S | I | SI | benign            |
| rs4455261 | NP_004067 | V | I | VI | benign            |
| rs4456359 | NP_005791 | L | V | LV | benign            |
| rs4459050 | NP_848640 | M | V | MV | possibly damaging |
| rs4459164 | XP_372789 | L | V | LV | benign            |
| rs4462136 | XP_372763 | R | C | RC | benign            |
| rs4462184 | XP_377645 | V | A | VA | benign            |
| rs4462412 | XP_498534 | P | L | PL | probably damaging |
| rs4462638 | XP_375408 | A | T | AT | benign            |
| rs4462660 | NP_055498 | T | I | TI | possibly damaging |
| rs4462745 | XP_496593 | Q | K | QK | benign            |
| rs4463051 | XP_496719 | D | N | DN | benign            |
| rs4463136 | XP_376320 | T | A | TA | benign            |
| rs4463407 | NP_002155 | I | S | IS | possibly damaging |
| rs4463721 | XP_371227 | A | V | AV | benign            |
| rs4465020 | NP_694856 | E | Q | EQ | benign            |
| rs4465125 | NP_775741 | A | G | AG | benign            |
| rs4465542 | XP_290629 | T | A | TA | benign            |

|           |           |   |   |    |                   |
|-----------|-----------|---|---|----|-------------------|
| rs4466466 | NP_005379 | K | N | KN | benign            |
| rs4466620 | NP_115640 | F | L | FL | benign            |
| rs4467039 | NP_002490 | P | L | PL | probably damaging |
| rs4467098 | NP_079469 | G | D | GD | possibly damaging |
| rs4467695 | NP_000834 | L | V | LV | benign            |
| rs4468625 | NP_056061 | D | E | DE | benign            |
| rs4468717 | NP_733796 | P | S | PS | benign            |
| rs4468717 | NP_775299 | P | S | PS | benign            |
| rs4468717 | NP_777480 | P | S | PS | probably damaging |
| rs4469048 | NP_055084 | D | E | DE | benign            |
| rs4469048 | NP_068551 | D | E | DE | benign            |
| rs4469788 | NP_003165 | Y | F | YF | benign            |
| rs4469788 | NP_068506 | Y | F | YF | benign            |
| rs4469829 | NP_003010 | E | K | EK | benign            |
| rs4470116 | NP_955389 | R | K | RK | benign            |
| rs4470116 | NP_055598 | R | K | RK | benign            |
| rs4470360 | NP_061720 | H | P | HP | probably damaging |
| rs4470483 | NP_001239 | E | D | ED | benign            |
| rs4470839 | XP_371813 | V | G | VG | possibly damaging |
| rs4471066 | XP_499105 | C | Y | CY | benign            |
| rs4471067 | XP_499105 | V | L | VL | benign            |
| rs4471273 | XP_372763 | S | F | SF | benign            |
| rs4471342 | NP_002408 | Q | P | QP | benign            |
| rs4473306 | NP_006856 | Y | H | YH | benign            |
| rs4474294 | XP_291439 | M | R | MR | probably damaging |
| rs4474449 | XP_372436 | Y | C | YC | possibly damaging |
| rs4474449 | XP_166777 | Y | C | YC | possibly damaging |
| rs4474837 | NP_056465 | S | R | SR | benign            |
| rs4474937 | NP_115597 | Q | H | QH | possibly damaging |
| rs4475909 | XP_372191 | R | Q | RQ | benign            |
| rs4477896 | NP_997212 | V | I | VI | benign            |
| rs4478039 | NP_002843 | E | K | EK | benign            |
| rs4478130 | XP_094074 | D | N | DN | benign            |
| rs4478844 | XP_372822 | V | M | VM | benign            |
| rs4479447 | NP_055312 | D | H | DH | possibly damaging |
| rs4479748 | NP_699174 | S | G | SG | benign            |
| rs4480453 | NP_003568 | L | M | LM | benign            |
| rs4481339 | NP_000834 | V | G | VG | probably damaging |
| rs4482466 | NP_000936 | L | S | LS | benign            |
| rs4483198 | NP_570901 | L | V | LV | benign            |
| rs4483803 | NP_064596 | D | Y | DY | possibly damaging |
| rs4484130 | NP_852469 | Y | F | YF | benign            |
| rs4484130 | NP_005641 | Y | F | YF | benign            |
| rs4486183 | NP_006739 | P | T | PT | benign            |
| rs4486587 | XP_374880 | A | T | AT | benign            |
| rs4487574 | XP_371822 | V | G | VG | possibly damaging |



|           |           |   |   |    |                   |
|-----------|-----------|---|---|----|-------------------|
| rs4487883 | NP_659402 | D | Y | DY | possibly damaging |
| rs4488281 | NP_060069 | S | I | SI | possibly damaging |
| rs4488969 | NP_699174 | D | N | DN | benign            |
| rs4489310 | NP_006739 | E | D | ED | benign            |
| rs4489790 | NP_002828 | I | M | IM | benign            |
| rs4490972 | NP_808225 | D | N | DN | benign            |
| rs4490972 | NP_808226 | D | N | DN | benign            |
| rs4490972 | NP_808223 | D | N | DN | benign            |
| rs4490972 | NP_808224 | D | N | DN | benign            |
| rs4491195 | XP_291816 | A | G | AG | benign            |
| rs4491934 | NP_003801 | S | F | SF | possibly damaging |
| rs4492688 | NP_116222 | E | K | EK | benign            |
| rs4494160 | NP_775803 | A | V | AV | benign            |
| rs4494468 | XP_497390 | L | I | LI | benign            |
| rs4494683 | XP_496593 | T | P | TP | possibly damaging |
| rs4494951 | NP_054768 | R | Q | RQ | benign            |
| rs4495918 | XP_372366 | C | F | CF | benign            |
| rs4496303 | NP_982288 | A | S | AS | benign            |
| rs4497234 | NP_036234 | G | E | GE | possibly damaging |
| rs4497919 | XP_496260 | S | N | SN | benign            |
| rs4498440 | NP_055266 | T | A | TA | benign            |
| rs4498440 | NP_940820 | T | A | TA | benign            |
| rs4499086 | XP_056680 | I | L | IL | benign            |
| rs4499134 | NP_904358 | E | K | EK | benign            |
| rs4500097 | XP_499105 | H | P | HP | probably damaging |
| rs4500406 | NP_775843 | R | G | RG | possibly damaging |
| rs4500734 | NP_777584 | L | R | LR | benign            |
| rs4501820 | NP_003166 | R | K | RK | benign            |
| rs4501959 | XP_291977 | D | N | DN | benign            |
| rs4502371 | XP_372923 | T | S | TS | benign            |
| rs4503360 | XP_291396 | Y | S | YS | benign            |
| rs4503752 | NP_997238 | H | D | HD | probably damaging |
| rs4503841 | NP_057100 | S | F | SF | possibly damaging |
| rs4504469 | XP_376472 | A | T | AT | benign            |
| rs4505267 | XP_370833 | C | R | CR | benign            |
| rs4506445 | XP_375747 | G | V | GV | probably damaging |
| rs4507047 | XP_496593 | L | P | LP | probably damaging |
| rs4507838 | XP_208403 | I | V | IV | benign            |
| rs4509014 | NP_057564 | E | K | EK | benign            |
| rs4509608 | XP_377645 | D | N | DN | possibly damaging |
| rs4510314 | NP_056189 | R | H | RH | possibly damaging |
| rs4511430 | NP_060463 | L | F | LF | benign            |
| rs4511677 | NP_061115 | G | A | GA | benign            |
| rs4513070 | XP_496050 | L | F | LF | possibly damaging |
| rs4514179 | NP_085142 | C | R | CR | probably damaging |
| rs4514247 | XP_291396 | R | C | RC | possibly damaging |

|           |           |   |   |    |                   |
|-----------|-----------|---|---|----|-------------------|
| rs4514473 | NP_003796 | E | K | EK | benign            |
| rs4515815 | NP_859070 | H | R | HR | benign            |
| rs4516060 | NP_116045 | S | G | SG | benign            |
| rs4516605 | NP_000403 | S | L | SL | benign            |
| rs4516942 | XP_498102 | G | S | GS | benign            |
| rs4517595 | NP_054886 | L | M | LM | benign            |
| rs4519083 | NP_937828 | Q | H | QH | benign            |
| rs4519169 | NP_000611 | P | L | PL | probably damaging |
| rs4521339 | XP_371691 | A | T | AT | benign            |
| rs4523540 | NP_000355 | N | Y | NY | possibly damaging |
| rs4523549 | XP_291439 | N | T | NT | possibly damaging |
| rs4523774 | NP_000957 | L | V | LV | benign            |
| rs4523977 | NP_817084 | T | M | TM | benign            |
| rs4523977 | NP_003940 | T | M | TM | possibly damaging |
| rs4524901 | NP_055101 | I | F | IF | possibly damaging |
| rs4525444 | XP_208847 | S | T | ST | benign            |
| rs4525444 | XP_497431 | S | T | ST | benign            |
| rs4525916 | NP_066278 | D | Y | DY | probably damaging |
| rs4525960 | NP_056002 | Y | N | YN | probably damaging |
| rs4526148 | NP_006589 | T | A | TA | benign            |
| rs4526640 | XP_498755 | F | I | FI | possibly damaging |
| rs4527063 | XP_371068 | Q | R | QR | benign            |
| rs4528317 | NP_937828 | Y | N | YN | probably damaging |
| rs4528532 | NP_997238 | I | V | IV | benign            |
| rs4528541 | NP_055474 | G | C | GC | benign            |
| rs4528888 | NP_005956 | Y | C | YC | probably damaging |
| rs4528888 | NP_444254 | Y | C | YC | probably damaging |
| rs4528888 | NP_444255 | Y | C | YC | probably damaging |
| rs4528888 | NP_444256 | Y | C | YC | probably damaging |
| rs4528888 | NP_444257 | Y | C | YC | probably damaging |
| rs4528888 | NP_444258 | Y | C | YC | probably damaging |
| rs4528888 | NP_444253 | Y | C | YC | probably damaging |
| rs4529373 | XP_372002 | Y | F | YF | benign            |
| rs4530457 | XP_496503 | S | R | SR | benign            |
| rs4533265 | XP_496093 | I | F | IF | benign            |
| rs4534327 | NP_115724 | L | I | LI | benign            |
| rs4536103 | NP_066279 | S | F | SF | benign            |
| rs4538419 | NP_001519 | L | V | LV | benign            |
| rs4538937 | XP_034640 | L | F | LF | possibly damaging |
| rs4539594 | NP_006077 | T | P | TP | probably damaging |
| rs4539653 | XP_498684 | G | V | GV | probably damaging |
| rs4539655 | NP_853513 | N | S | NS | benign            |
| rs4540524 | XP_497046 | R | G | RG | possibly damaging |
| rs4541339 | NP_055061 | A | V | AV | benign            |
| rs4541624 | XP_380175 | S | A | SA | benign            |
| rs4542096 | NP_005269 | M | V | MV | possibly damaging |

|           |           |   |   |    |                   |
|-----------|-----------|---|---|----|-------------------|
| rs4544986 | NP_002205 | S | F | SF | benign            |
| rs4545280 | NP_258428 | F | I | FI | benign            |
| rs4545636 | NP_057321 | D | Y | DY | probably damaging |
| rs4546744 | NP_116263 | L | R | LR | benign            |
| rs4546904 | NP_065173 | S | T | ST | benign            |
| rs4548513 | NP_037398 | S | N | SN | possibly damaging |
| rs4548749 | XP_372494 | C | Y | CY | probably damaging |
| rs4549582 | NP_064502 | A | V | AV | benign            |
| rs4550493 | XP_496215 | R | H | RH | benign            |
| rs4550516 | NP_116226 | E | D | ED | benign            |
| rs4555134 | NP_689547 | E | Q | EQ | benign            |
| rs4557013 | XP_371586 | I | T | IT | benign            |
| rs4557211 | NP_002917 | S | F | SF | possibly damaging |
| rs4557211 | NP_937872 | S | F | SF | possibly damaging |
| rs4557211 | NP_940834 | S | F | SF | possibly damaging |
| rs4557522 | NP_579866 | A | V | AV | benign            |
| rs4557522 | NP_060758 | A | V | AV | benign            |
| rs4558385 | NP_060298 | Y | C | YC | probably damaging |
| rs4559074 | NP_006715 | H | R | HR | probably damaging |
| rs4559173 | NP_000457 | I | R | IR | possibly damaging |
| rs4560893 | XP_498326 | G | E | GE | benign            |
| rs4560893 | XP_498328 | G | E | GE | benign            |
| rs4561035 | NP_112572 | N | S | NS | benign            |
| rs4561518 | NP_115948 | S | P | SP | possibly damaging |
| rs4561519 | NP_115948 | G | R | GR | probably damaging |
| rs4561736 | NP_061836 | E | Q | EQ | benign            |
| rs4561736 | NP_387505 | E | Q | EQ | benign            |
| rs4561948 | NP_955356 | P | L | PL | probably damaging |
| rs4561961 | NP_997235 | E | Q | EQ | benign            |
| rs4562395 | NP_006435 | E | K | EK | benign            |
| rs4562958 | XP_372494 | V | M | VM | benign            |
| rs4563237 | XP_086937 | S | F | SF | possibly damaging |
| rs4564058 | XP_498350 | E | K | EK | benign            |
| rs4564058 | XP_498407 | E | K | EK | benign            |
| rs4564704 | XP_064879 | L | M | LM | benign            |
| rs4564790 | NP_775783 | A | T | AT | benign            |
| rs4564894 | XP_496527 | A | V | AV | benign            |
| rs4565167 | XP_042066 | I | T | IT | possibly damaging |
| rs4565430 | NP_055569 | E | Q | EQ | benign            |
| rs4565902 | NP_149025 | E | A | EA | benign            |
| rs4565978 | NP_060069 | I | T | IT | benign            |
| rs4566088 | NP_085124 | R | T | RT | possibly damaging |
| rs4566088 | NP_803187 | R | T | RT | possibly damaging |
| rs4566183 | NP_003577 | T | P | TP | benign            |
| rs4568003 | XP_496260 | S | G | SG | benign            |
| rs4568063 | XP_497940 | I | V | IV | benign            |

|           |           |   |   |    |                   |
|-----------|-----------|---|---|----|-------------------|
| rs4569078 | NP_689802 | M | I | MI | benign            |
| rs4569397 | NP_039227 | L | Q | LQ | possibly damaging |
| rs4570322 | XP_373354 | R | C | RC | benign            |
| rs4570987 | XP_375646 | R | H | RH | probably damaging |
| rs4571168 | NP_005931 | R | P | RP | probably damaging |
| rs4571280 | NP_003432 | E | K | EK | benign            |
| rs4572095 | XP_061890 | Q | R | QR | benign            |
| rs4572095 | XP_495891 | R | Q | RQ | benign            |
| rs4573667 | NP_006025 | F | L | FL | benign            |
| rs4574980 | NP_006298 | P | S | PS | probably damaging |
| rs4576240 | XP_376472 | T | P | TP | benign            |
| rs4578610 | NP_997238 | C | R | CR | probably damaging |
| rs4580937 | NP_078999 | R | H | RH | benign            |
| rs4580937 | NP_891554 | R | H | RH | possibly damaging |
| rs4581096 | NP_116291 | L | V | LV | benign            |
| rs4581493 | NP_003796 | E | K | EK | benign            |
| rs4581676 | NP_005494 | C | G | CG | probably damaging |
| rs4581766 | XP_375387 | E | K | EK | benign            |
| rs4582048 | NP_000711 | I | M | IM | benign            |
| rs4582772 | NP_940862 | T | I | TI | benign            |
| rs4584048 | XP_374406 | S | F | SF | possibly damaging |
| rs4584886 | NP_112584 | W | R | WR | probably damaging |
| rs4584889 | NP_060619 | N | S | NS | benign            |
| rs4586421 | XP_058743 | V | G | VG | possibly damaging |
| rs4587366 | NP_036294 | L | V | LV | benign            |
| rs4587366 | NP_078831 | V | L | VL | benign            |
| rs4587808 | NP_002251 | R | K | RK | possibly damaging |
| rs4587808 | NP_031359 | R | K | RK | possibly damaging |
| rs4589405 | NP_848635 | V | M | VM | benign            |
| rs4589553 | NP_001752 | A | T | AT | benign            |
| rs4590080 | XP_044461 | C | S | CS | probably damaging |
| rs4590708 | XP_291439 | D | N | DN | benign            |
| rs4592451 | XP_372366 | S | P | SP | possibly damaging |
| rs4595394 | XP_291439 | A | G | AG | benign            |
| rs4595780 | XP_496093 | C | Y | CY | probably damaging |
| rs4596117 | NP_620385 | T | P | TP | benign            |
| rs4596117 | NP_620386 | T | P | TP | benign            |
| rs4596117 | NP_740750 | T | P | TP | benign            |
| rs4596117 | NP_620161 | T | P | TP | benign            |
| rs4597008 | NP_057196 | V | G | VG | possibly damaging |
| rs4597168 | NP_002119 | P | L | PL | possibly damaging |
| rs4597335 | NP_065769 | Q | H | QH | benign            |
| rs4597699 | NP_940962 | K | R | KR | benign            |
| rs4597753 | XP_496634 | N | K | NK | benign            |
| rs4598385 | NP_777622 | C | R | CR | benign            |
| rs4598663 | NP_937828 | G | R | GR | possibly damaging |

|           |           |   |   |    |                   |
|-----------|-----------|---|---|----|-------------------|
| rs4598671 | XP_210169 | V | L | VL | benign            |
| rs4599882 | NP_001726 | S | F | SF | possibly damaging |
| rs4600514 | NP_258411 | R | W | RW | possibly damaging |
| rs4600893 | XP_496692 | M | I | MI | benign            |
| rs4601242 | NP_060804 | P | R | PR | probably damaging |
| rs4602894 | NP_002309 | S | W | SW | probably damaging |
| rs4603354 | NP_006437 | G | E | GE | probably damaging |
| rs4603404 | NP_005791 | R | G | RG | possibly damaging |
| rs4604030 | NP_006578 | A | T | AT | benign            |
| rs4604043 | XP_114415 | E | K | EK | probably damaging |
| rs4604687 | XP_291625 | Y | S | YS | benign            |
| rs4604687 | XP_291638 | Y | S | YS | benign            |
| rs4605294 | NP_001073 | L | F | LF | possibly damaging |
| rs4606855 | NP_115960 | E | Q | EQ | benign            |
| rs4607487 | NP_078774 | S | L | SL | benign            |
| rs4608088 | XP_370663 | R | G | RG | possibly damaging |
| rs4608339 | XP_370958 | V | A | VA | benign            |
| rs4608469 | XP_496593 | V | I | VI | benign            |
| rs4608774 | NP_002984 | G | S | GS | possibly damaging |
| rs4610310 | XP_496692 | F | L | FL | benign            |
| rs4612551 | XP_377073 | T | M | TM | possibly damaging |
| rs4612551 | NP_878908 | T | M | TM | possibly damaging |
| rs4613097 | XP_045581 | A | T | AT | benign            |
| rs4613427 | XP_067585 | E | K | EK | benign            |
| rs4613695 | NP_995308 | R | K | RK | benign            |
| rs4613903 | NP_789787 | L | M | LM | benign            |
| rs4614184 | NP_065820 | G | S | GS | benign            |
| rs4614387 | XP_495821 | W | R | WR | probably damaging |
| rs4614723 | NP_002959 | I | V | IV | benign            |
| rs4615916 | XP_495798 | P | H | PH | possibly damaging |
| rs4616580 | XP_496486 | K | N | KN | benign            |
| rs4616798 | NP_078905 | I | M | IM | benign            |
| rs4617632 | NP_002828 | D | N | DN | benign            |
| rs4617667 | NP_997321 | P | L | PL | probably damaging |
| rs4617782 | NP_848701 | E | Q | EQ | possibly damaging |
| rs4617782 | NP_848702 | E | Q | EQ | possibly damaging |
| rs4617782 | NP_002710 | E | Q | EQ | possibly damaging |
| rs4617782 | NP_848703 | E | Q | EQ | possibly damaging |
| rs4617831 | NP_714544 | G | R | GR | possibly damaging |
| rs4618260 | NP_115876 | A | S | AS | benign            |
| rs4619071 | NP_689799 | D | N | DN | benign            |
| rs4619320 | NP_004230 | E | D | ED | benign            |
| rs4619433 | NP_061000 | T | A | TA | benign            |
| rs4619710 | XP_290331 | A | V | AV | benign            |
| rs4620241 | NP_002086 | S | A | SA | benign            |
| rs4621113 | NP_787106 | C | F | CF | probably damaging |

|           |           |   |   |    |                   |
|-----------|-----------|---|---|----|-------------------|
| rs4622929 | XP_171032 | V | I | VI | benign            |
| rs4623201 | NP_114479 | S | F | SF | benign            |
| rs4623201 | NP_061736 | S | F | SF | benign            |
| rs4623217 | XP_048070 | T | N | TN | benign            |
| rs4623769 | NP_997668 | G | R | GR | benign            |
| rs4623769 | NP_997667 | G | R | GR | benign            |
| rs4623947 | NP_002828 | A | S | AS | benign            |
| rs4623981 | NP_775487 | G | S | GS | benign            |
| rs4624233 | NP_853513 | V | A | VA | benign            |
| rs4625290 | XP_291396 | D | E | DE | benign            |
| rs4628939 | XP_496093 | C | S | CS | probably damaging |
| rs4629585 | XP_371776 | M | L | ML | benign            |
| rs4629933 | XP_071093 | L | V | LV | benign            |
| rs4629933 | XP_373308 | L | V | LV | benign            |
| rs4630029 | NP_775794 | R | H | RH | benign            |
| rs4630153 | NP_037471 | S | F | SF | possibly damaging |
| rs4631513 | NP_060961 | A | T | AT | benign            |
| rs4631561 | NP_000450 | A | T | AT | benign            |
| rs4631912 | NP_872301 | T | I | TI | possibly damaging |
| rs4632083 | NP_061122 | P | S | PS | possibly damaging |
| rs4632083 | XP_292357 | P | S | PS | possibly damaging |
| rs4632111 | NP_004468 | P | Q | PQ | possibly damaging |
| rs4632862 | NP_598000 | N | S | NS | benign            |
| rs4633461 | NP_937828 | T | I | TI | benign            |
| rs4634233 | XP_049078 | L | M | LM | benign            |
| rs4635033 | NP_066267 | E | K | EK | benign            |
| rs4635110 | NP_803172 | S | F | SF | possibly damaging |
| rs4635110 | NP_003617 | S | F | SF | possibly damaging |
| rs4635462 | NP_689732 | A | P | AP | benign            |
| rs4636746 | NP_055533 | H | L | HL | probably damaging |
| rs4638862 | NP_690857 | A | T | AT | benign            |
| rs4638862 | NP_219489 | A | T | AT | benign            |
| rs4639425 | NP_733751 | N | D | ND | benign            |
| rs4639950 | NP_113621 | I | V | IV | benign            |
| rs4640000 | XP_058513 | P | A | PA | possibly damaging |
| rs4640157 | XP_496050 | K | Q | KQ | benign            |
| rs4640464 | NP_982271 | D | H | DH | possibly damaging |
| rs4640464 | NP_003886 | D | H | DH | possibly damaging |
| rs4641048 | NP_006412 | Q | H | QH | benign            |
| rs4641415 | XP_495821 | K | E | KE | benign            |
| rs4641949 | NP_004473 | D | N | DN | benign            |
| rs4643272 | NP_078856 | R | I | RI | possibly damaging |
| rs4643305 | XP_058743 | V | L | VL | benign            |
| rs4643439 | XP_497591 | S | F | SF | benign            |
| rs4643790 | XP_050625 | A | V | AV | benign            |
| rs4644955 | NP_776165 | R | H | RH | benign            |

|           |           |   |   |    |                   |
|-----------|-----------|---|---|----|-------------------|
| rs4645434 | NP_149062 | E | D | ED | benign            |
| rs4645434 | NP_892006 | E | D | ED | benign            |
| rs4645777 | NP_006730 | V | I | VI | benign            |
| rs4645843 | NP_000585 | P | L | PL | benign            |
| rs4645959 | NP_002458 | N | S | NS | possibly damaging |
| rs4645960 | NP_002458 | G | C | GC | benign            |
| rs4645961 | NP_002458 | V | I | VI | benign            |
| rs4645968 | NP_002458 | A | V | AV | benign            |
| rs4646008 | NP_127463 | S | L | SL | benign            |
| rs4646008 | NP_001220 | S | L | SL | benign            |
| rs4646116 | NP_068576 | K | R | KR | benign            |
| rs4646201 | NP_003050 | G | E | GE | probably damaging |
| rs4646227 | NP_005064 | G | A | GA | benign            |
| rs4646277 | NP_694857 | P | L | PL | probably damaging |
| rs4646277 | NP_003048 | P | L | PL | probably damaging |
| rs4646278 | NP_694857 | R | G | RG | probably damaging |
| rs4646278 | NP_003048 | R | G | RG | probably damaging |
| rs4646422 | NP_000490 | G | D | GD | possibly damaging |
| rs4646487 | NP_000770 | R | W | RW | possibly damaging |
| rs4646491 | NP_000770 | R | C | RC | probably damaging |
| rs4646626 | NP_003879 | V | I | VI | benign            |
| rs4646626 | NP_733798 | V | I | VI | benign            |
| rs4646626 | NP_733797 | V | I | VI | benign            |
| rs4646749 | NP_036322 | V | M | VM | benign            |
| rs4646750 | NP_036322 | I | V | IV | benign            |
| rs4646773 | NP_000683 | T | I | TI | benign            |
| rs4646826 | NP_000686 | S | R | SR | probably damaging |
| rs4646832 | NP_733936 | G | R | GR | benign            |
| rs4646832 | NP_001071 | G | R | GR | benign            |
| rs4647105 | NP_000073 | Y | C | YC | probably damaging |
| rs4647186 | NP_033666 | A | G | AG | benign            |
| rs4647186 | NP_002332 | S | R | SR | possibly damaging |
| rs4647187 | NP_002332 | L | F | LF | benign            |
| rs4647201 | NP_055620 | A | S | AS | benign            |
| rs4647202 | NP_055620 | V | F | VF | benign            |
| rs4647297 | NP_116764 | V | L | VL | benign            |
| rs4647297 | NP_001215 | V | L | VL | benign            |
| rs4647298 | NP_116765 | A | G | AG | benign            |
| rs4647298 | NP_116766 | A | G | AG | benign            |
| rs4647298 | NP_116764 | P | A | PA | possibly damaging |
| rs4647298 | NP_001215 | P | A | PA | possibly damaging |
| rs4647338 | NP_116764 | R | G | RG | probably damaging |
| rs4647750 | NP_000098 | M | T | MT | possibly damaging |
| rs4647751 | NP_000098 | A | T | AT | benign            |
| rs4647764 | NP_001601 | V | I | VI | benign            |
| rs4647852 | NP_001276 | K | R | KR | benign            |

|           |           |   |   |    |                   |
|-----------|-----------|---|---|----|-------------------|
| rs4647899 | NP_004265 | F | Y | FY | benign            |
| rs4647924 | NP_075254 | P | R | PR | possibly damaging |
| rs4647924 | NP_000133 | P | R | PR | probably damaging |
| rs4647930 | NP_068742 | Q | P | QP | benign            |
| rs4647932 | NP_068742 | P | L | PL | possibly damaging |
| rs4648065 | NP_003989 | T | I | TI | benign            |
| rs4648072 | NP_003989 | M | V | MV | possibly damaging |
| rs4648085 | NP_003989 | T | I | TI | benign            |
| rs4648086 | NP_003989 | R | K | RK | benign            |
| rs4648099 | NP_003989 | H | Q | HQ | possibly damaging |
| rs4648118 | NP_003989 | A | T | AT | benign            |
| rs4648279 | NP_000954 | P | A | PA | benign            |
| rs4648506 | XP_031401 | G | A | GA | benign            |
| rs4649711 | XP_378185 | A | G | AG | benign            |
| rs4649852 | NP_982283 | T | S | TS | benign            |
| rs4653328 | NP_775912 | F | I | FI | benign            |
| rs4654934 | NP_115640 | K | N | KN | possibly damaging |
| rs4656197 | NP_065156 | Q | R | QR | benign            |
| rs4656197 | NP_851607 | R | Q | RQ | benign            |
| rs4656343 | NP_056256 | P | L | PL | benign            |
| rs4658146 | NP_940862 | V | M | VM | benign            |
| rs4658359 | NP_940862 | S | A | SA | benign            |
| rs4658360 | NP_940862 | F | L | FL | benign            |
| rs4659310 | XP_496394 | A | V | AV | benign            |
| rs4659310 | XP_375869 | A | V | AV | benign            |
| rs4659683 | XP_375853 | V | G | VG | possibly damaging |
| rs4660269 | NP_861525 | M | V | MV | benign            |
| rs4661746 | NP_940948 | Q | R | QR | benign            |
| rs4661801 | XP_497659 | H | Q | HQ | benign            |
| rs4662743 | XP_371555 | R | C | RC | benign            |
| rs4663845 | NP_919288 | A | V | AV | benign            |
| rs4663870 | NP_066307 | V | E | VE | possibly damaging |
| rs4664277 | XP_043492 | T | A | TA | benign            |
| rs4664950 | NP_620158 | Q | R | QR | benign            |
| rs4665809 | XP_372921 | F | L | FL | possibly damaging |
| rs4666602 | NP_995314 | D | N | DN | possibly damaging |
| rs4666602 | NP_038464 | D | N | DN | possibly damaging |
| rs4667001 | NP_919226 | E | K | EK | benign            |
| rs4667591 | NP_004516 | I | L | IL | benign            |
| rs4667596 | NP_004516 | R | K | RK | benign            |
| rs4668123 | NP_004516 | A | T | AT | benign            |
| rs4668246 | NP_620482 | K | E | KE | benign            |
| rs4668909 | NP_056993 | K | R | KR | benign            |
| rs4669751 | NP_055483 | V | A | VA | benign            |
| rs4669751 | NP_683701 | V | A | VA | benign            |
| rs4669751 | NP_149081 | V | A | VA | benign            |



|           |           |   |   |    |                   |
|-----------|-----------|---|---|----|-------------------|
| rs4669781 | NP_663731 | P | S | PS | benign            |
| rs4670218 | XP_293026 | S | C | SC | possibly damaging |
| rs4670696 | NP_036545 | H | P | HP | probably damaging |
| rs4670779 | XP_293026 | A | V | AV | benign            |
| rs4670800 | NP_653314 | D | G | DG | benign            |
| rs4674318 | XP_376172 | C | W | CW | probably damaging |
| rs4674361 | NP_056495 | P | L | PL | benign            |
| rs4674941 | XP_371595 | I | M | IM | benign            |
| rs4675887 | NP_689996 | R | G | RG | possibly damaging |
| rs4675982 | XP_297687 | V | E | VE | benign            |
| rs4676684 | NP_057382 | V | A | VA | benign            |
| rs4678193 | NP_002255 | S | N | SN | benign            |
| rs4679013 | NP_056957 | H | P | HP | probably damaging |
| rs4679674 | XP_114355 | V | A | VA | benign            |
| rs4681031 | NP_001059 | E | K | EK | benign            |
| rs4682119 | XP_496655 | R | L | RL | benign            |
| rs4682752 | NP_659481 | M | V | MV | benign            |
| rs4682829 | XP_291064 | V | G | VG | possibly damaging |
| rs4682830 | XP_291064 | A | G | AG | benign            |
| rs4683158 | NP_078789 | Q | R | QR | benign            |
| rs4684656 | NP_705615 | L | M | LM | benign            |
| rs4684656 | NP_705616 | L | M | LM | benign            |
| rs4684677 | NP_057446 | Q | L | QL | probably damaging |
| rs4684682 | NP_899195 | R | Q | RQ | possibly damaging |
| rs4684682 | NP_109598 | R | Q | RQ | possibly damaging |
| rs4685076 | NP_077310 | K | N | KN | benign            |
| rs4686302 | NP_000907 | A | T | AT | benign            |
| rs4687030 | NP_940887 | Y | S | YS | probably damaging |
| rs4687657 | NP_002209 | P | T | PT | possibly damaging |
| rs4687714 | NP_001055 | K | R | KR | benign            |
| rs4687838 | NP_689752 | N | T | NT | benign            |
| rs4688023 | NP_071418 | V | I | VI | benign            |
| rs4688725 | NP_009113 | K | Q | KQ | benign            |
| rs4688725 | NP_733833 | K | Q | KQ | benign            |
| rs4688725 | NP_733834 | K | Q | KQ | benign            |
| rs4688725 | NP_733835 | K | Q | KQ | benign            |
| rs4688725 | NP_733832 | K | Q | KQ | benign            |
| rs4689254 | NP_660334 | A | T | AT | benign            |
| rs4689278 | NP_667338 | S | G | SG | benign            |
| rs4690006 | NP_054908 | L | M | LM | benign            |
| rs4690006 | NP_054909 | L | M | LM | benign            |
| rs4690006 | NP_789771 | L | M | LM | benign            |
| rs4690006 | NP_001110 | L | M | LM | benign            |
| rs4690224 | NP_000194 | D | E | DE | benign            |
| rs4690225 | NP_000194 | R | W | RW | possibly damaging |
| rs4690226 | NP_000194 | R | C | RC | probably damaging |

|           |           |   |   |    |                   |
|-----------|-----------|---|---|----|-------------------|
| rs4690661 | NP_733828 | A | T | AT | benign            |
| rs4691896 | NP_612395 | V | I | VI | benign            |
| rs4692661 | XP_037817 | Y | C | YC | benign            |
| rs4694082 | NP_002083 | K | R | KR | benign            |
| rs4695632 | XP_496692 | E | K | EK | benign            |
| rs4695918 | NP_085136 | G | S | GS | benign            |
| rs4696354 | NP_663772 | I | V | IV | benign            |
| rs4697879 | XP_041221 | H | R | HR | benign            |
| rs4698803 | NP_001954 | V | E | VE | benign            |
| rs4699384 | XP_373030 | M | L | ML | benign            |
| rs4699735 | NP_000663 | S | C | SC | benign            |
| rs4700010 | NP_057422 | L | F | LF | benign            |
| rs4701997 | NP_001360 | I | L | IL | benign            |
| rs4703094 | XP_496769 | L | P | LP | possibly damaging |
| rs4704166 | NP_057675 | V | I | VI | benign            |
| rs4705336 | NP_076933 | E | D | ED | benign            |
| rs4705426 | NP_055043 | L | M | LM | benign            |
| rs4705693 | NP_000029 | A | S | AS | benign            |
| rs4706980 | NP_055833 | R | Q | RQ | benign            |
| rs4707358 | NP_940970 | T | I | TI | possibly damaging |
| rs4707557 | NP_055426 | N | K | NK | benign            |
| rs4707569 | NP_055426 | F | V | FV | possibly damaging |
| rs4708626 | NP_085118 | M | K | MK | benign            |
| rs4708626 | NP_005346 | M | K | MK | benign            |
| rs4708771 | NP_061847 | V | M | VM | benign            |
| rs4709245 | XP_498157 | K | E | KE | benign            |
| rs4709246 | XP_498157 | M | V | MV | benign            |
| rs4710963 | NP_060244 | R | S | RS | probably damaging |
| rs4711245 | NP_001945 | R | W | RW | possibly damaging |
| rs4711459 | XP_371817 | V | A | VA | benign            |
| rs4712138 | NP_056363 | Q | R | QR | benign            |
| rs4712138 | NP_899236 | Q | R | QR | possibly damaging |
| rs4712990 | NP_008979 | P | T | PT | possibly damaging |
| rs4713497 | NP_115859 | R | W | RW | probably damaging |
| rs4713498 | NP_115859 | Q | K | QK | benign            |
| rs4713499 | NP_115859 | S | A | SA | benign            |
| rs4713956 | NP_775947 | S | P | SP | benign            |
| rs4714759 | XP_371822 | V | M | VM | benign            |
| rs4715227 | NP_619639 | Q | R | QR | benign            |
| rs4715630 | NP_056363 | M | I | MI | possibly damaging |
| rs4715630 | NP_899236 | M | I | MI | probably damaging |
| rs4715631 | NP_899236 | T | A | TA | benign            |
| rs4715631 | NP_056363 | T | A | TA | benign            |
| rs4716346 | XP_376556 | S | G | SG | benign            |
| rs4716477 | XP_373223 | E | Q | EQ | benign            |
| rs4716731 | XP_373223 | A | V | AV | benign            |

|           |           |   |   |    |                   |
|-----------|-----------|---|---|----|-------------------|
| rs4716732 | XP_373223 | T | P | TP | possibly damaging |
| rs4716734 | XP_373223 | A | D | AD | benign            |
| rs4716746 | XP_373223 | S | P | SP | possibly damaging |
| rs4717170 | XP_498210 | R | H | RH | probably damaging |
| rs4719553 | NP_689956 | R | Q | RQ | benign            |
| rs4719966 | NP_061902 | V | G | VG | possibly damaging |
| rs4719966 | NP_112601 | V | G | VG | possibly damaging |
| rs4720015 | NP_006765 | C | F | CF | probably damaging |
| rs4721888 | NP_877439 | V | L | VL | benign            |
| rs4722266 | NP_113602 | G | E | GE | benign            |
| rs4722266 | NP_116562 | G | E | GE | benign            |
| rs4723010 | NP_006765 | D | N | DN | benign            |
| rs4724285 | NP_001120 | P | L | PL | probably damaging |
| rs4724663 | XP_376567 | S | P | SP | possibly damaging |
| rs4724708 | XP_377928 | A | V | AV | benign            |
| rs4725314 | XP_376720 | T | M | TM | possibly damaging |
| rs4725617 | NP_005223 | A | V | AV | benign            |
| rs4726476 | NP_061853 | R | T | RT | benign            |
| rs4726491 | XP_376684 | E | K | EK | benign            |
| rs4727540 | XP_379908 | R | H | RH | benign            |
| rs4727853 | NP_000483 | N | K | NK | benign            |
| rs4728137 | NP_073579 | E | Q | EQ | benign            |
| rs4728190 | NP_660311 | R | W | RW | possibly damaging |
| rs4728325 | NP_001619 | K | E | KE | benign            |
| rs4728329 | NP_064695 | D | N | DN | benign            |
| rs4728602 | NP_110425 | H | R | HR | benign            |
| rs4728602 | NP_683682 | H | R | HR | benign            |
| rs4728602 | XP_498218 | R | H | RH | possibly damaging |
| rs4728712 | NP_542782 | R | H | RH | benign            |
| rs4728730 | NP_068367 | H | Y | HY | possibly damaging |
| rs4728730 | NP_057435 | H | Y | HY | possibly damaging |
| rs4728730 | NP_068368 | H | Y | HY | possibly damaging |
| rs4728730 | NP_068369 | H | Y | HY | possibly damaging |
| rs4729542 | NP_659570 | V | I | VI | benign            |
| rs4729627 | XP_168578 | P | T | PT | possibly damaging |
| rs4730283 | NP_002282 | R | Q | RQ | benign            |
| rs4732620 | XP_372035 | S | G | SG | benign            |
| rs4732748 | XP_088331 | A | V | AV | benign            |
| rs4734455 | NP_003105 | A | D | AD | benign            |
| rs4734455 | NP_757367 | A | D | AD | benign            |
| rs4734653 | NP_005646 | S | F | SF | possibly damaging |
| rs4735133 | NP_803875 | H | R | HR | benign            |
| rs4736794 | NP_919270 | I | V | IV | benign            |
| rs4738070 | NP_006531 | M | I | MI | benign            |
| rs4739003 | NP_775959 | V | I | VI | benign            |
| rs4740046 | NP_940986 | N | S | NS | benign            |

|           |           |   |   |    |                   |
|-----------|-----------|---|---|----|-------------------|
| rs4740164 | NP_009102 | V | I | VI | benign            |
| rs4740412 | NP_006050 | R | Q | RQ | benign            |
| rs4740548 | NP_003820 | E | V | EV | possibly damaging |
| rs4741289 | NP_003820 | E | K | EK | benign            |
| rs4741510 | NP_775821 | S | T | ST | benign            |
| rs4742632 | NP_997188 | G | S | GS | benign            |
| rs4742643 | NP_997188 | R | P | RP | probably damaging |
| rs4742754 | NP_001846 | M | V | MV | benign            |
| rs4745196 | NP_958861 | I | L | IL | benign            |
| rs4745571 | XP_041018 | N | S | NS | benign            |
| rs4747096 | NP_542453 | E | G | EG | benign            |
| rs4747096 | NP_631894 | E | G | EG | benign            |
| rs4747194 | NP_071407 | R | Q | RQ | benign            |
| rs4747195 | NP_071407 | P | L | PL | probably damaging |
| rs4748728 | NP_006384 | N | K | NK | benign            |
| rs4750090 | NP_078969 | T | A | TA | benign            |
| rs4750685 | NP_002408 | T | I | TI | benign            |
| rs4752642 | NP_996744 | A | T | AT | benign            |
| rs4752721 | NP_060049 | Y | S | YS | probably damaging |
| rs4752721 | NP_015568 | Y | S | YS | probably damaging |
| rs4752904 | NP_002834 | D | E | DE | benign            |
| rs4753069 | XP_061871 | S | G | SG | benign            |
| rs4753495 | XP_374922 | A | E | AE | benign            |
| rs4754914 | XP_370652 | S | N | SN | benign            |
| rs4755705 | XP_039515 | N | D | ND | benign            |
| rs4755779 | NP_997005 | M | V | MV | benign            |
| rs4757707 | NP_116170 | A | P | AP | possibly damaging |
| rs4757986 | XP_372368 | R | M | RM | probably damaging |
| rs4757987 | XP_372368 | R | H | RH | benign            |
| rs4758141 | XP_291981 | T | I | TI | benign            |
| rs4758142 | XP_291981 | I | M | IM | benign            |
| rs4758168 | XP_372368 | V | I | VI | benign            |
| rs4758209 | XP_084578 | R | G | RG | possibly damaging |
| rs4758258 | XP_372373 | L | P | LP | possibly damaging |
| rs4758423 | NP_775860 | H | Y | HY | possibly damaging |
| rs4758443 | NP_003728 | T | M | TM | benign            |
| rs4759043 | NP_005370 | P | L | PL | possibly damaging |
| rs4759212 | XP_370696 | D | G | DG | possibly damaging |
| rs4759306 | NP_036423 | C | R | CR | probably damaging |
| rs4759675 | XP_044334 | G | V | GV | probably damaging |
| rs4760600 | NP_149115 | Y | C | YC | probably damaging |
| rs4761786 | NP_002272 | R | C | RC | probably damaging |
| rs4763566 | XP_495908 | K | E | KE | benign            |
| rs4763862 | NP_006134 | I | V | IV | benign            |
| rs4763876 | NP_110444 | R | Q | RQ | benign            |
| rs4763936 | XP_495908 | G | V | GV | possibly damaging |

|           |           |   |   |    |                   |
|-----------|-----------|---|---|----|-------------------|
| rs4764643 | NP_055318 | S | C | SC | possibly damaging |
| rs4767022 | NP_058132 | G | R | GR | benign            |
| rs4767022 | NP_002525 | G | R | GR | benign            |
| rs4767884 | NP_002850 | G | S | GS | benign            |
| rs4769131 | XP_208097 | D | E | DE | benign            |
| rs4775765 | NP_000129 | C | Y | CY | probably damaging |
| rs4777035 | NP_036343 | L | P | LP | benign            |
| rs4779061 | XP_058721 | K | T | KT | possibly damaging |
| rs4779794 | XP_375181 | G | E | GE | possibly damaging |
| rs4780144 | NP_001027 | C | R | CR | possibly damaging |
| rs4780409 | XP_042234 | R | S | RS | benign            |
| rs4780606 | NP_001162 | K | E | KE | benign            |
| rs4781022 | NP_000237 | N | T | NT | benign            |
| rs4781938 | NP_000824 | N | T | NT | possibly damaging |
| rs4782030 | NP_071449 | E | Q | EQ | benign            |
| rs4782591 | NP_647610 | C | Y | CY | benign            |
| rs4782591 | NP_005670 | C | Y | CY | benign            |
| rs4782905 | NP_758857 | E | K | EK | benign            |
| rs4783121 | XP_375377 | R | H | RH | benign            |
| rs4783453 | NP_037434 | R | Q | RQ | benign            |
| rs4784575 | NP_001257 | G | D | GD | benign            |
| rs4784677 | NP_114091 | S | N | SN | benign            |
| rs4784752 | NP_115582 | S | I | SI | benign            |
| rs4785732 | XP_047462 | L | M | LM | benign            |
| rs4785763 | NP_997335 | A | E | AE | possibly damaging |
| rs4785963 | NP_005138 | Y | N | YN | probably damaging |
| rs4786350 | NP_055529 | R | P | RP | benign            |
| rs4787115 | NP_000287 | F | L | FL | possibly damaging |
| rs4787278 | XP_497482 | R | C | RC | benign            |
| rs4787279 | XP_497482 | R | W | RW | benign            |
| rs4787280 | XP_497482 | D | G | DG | possibly damaging |
| rs4787952 | NP_000409 | V | G | VG | probably damaging |
| rs4787984 | XP_044632 | A | T | AT | benign            |
| rs4788682 | NP_008816 | A | V | AV | benign            |
| rs4789116 | NP_085133 | I | V | IV | benign            |
| rs4789773 | NP_775891 | I | V | IV | benign            |
| rs4790250 | NP_003684 | G | S | GS | benign            |
| rs4790250 | NP_663327 | G | S | GS | benign            |
| rs4790513 | NP_659505 | T | M | TM | benign            |
| rs4790555 | NP_055928 | S | A | SA | benign            |
| rs4791596 | XP_371019 | A | V | AV | benign            |
| rs4791641 | NP_036525 | P | L | PL | probably damaging |
| rs4792147 | NP_001132 | R | Q | RQ | benign            |
| rs4792311 | NP_060597 | L | S | LS | possibly damaging |
| rs4792898 | NP_005883 | P | R | PR | probably damaging |
| rs4794159 | NP_060427 | T | P | TP | benign            |

|           |           |   |   |    |                   |
|-----------|-----------|---|---|----|-------------------|
| rs4795452 | XP_371036 | A | V | AV | benign            |
| rs4795472 | NP_653284 | L | Q | LQ | benign            |
| rs4795581 | NP_000258 | Y | S | YS | probably damaging |
| rs4795690 | NP_612201 | V | M | VM | benign            |
| rs4795834 | NP_033665 | G | E | GE | probably damaging |
| rs4796033 | NP_002869 | R | Q | RQ | benign            |
| rs4796033 | NP_598332 | R | Q | RQ | benign            |
| rs4796077 | NP_689483 | D | N | DN | benign            |
| rs4796555 | NP_694962 | P | S | PS | possibly damaging |
| rs4796603 | NP_817084 | S | T | ST | benign            |
| rs4796603 | NP_003940 | S | T | ST | benign            |
| rs4796604 | NP_817084 | K | R | KR | benign            |
| rs4796604 | NP_003940 | K | R | KR | benign            |
| rs4796693 | NP_817084 | S | L | SL | benign            |
| rs4796693 | NP_003940 | S | L | SL | benign            |
| rs4796697 | NP_002265 | A | T | AT | benign            |
| rs4796697 | NP_705694 | A | T | AT | benign            |
| rs4796853 | XP_171855 | G | C | GC | probably damaging |
| rs4796855 | XP_171855 | A | D | AD | possibly damaging |
| rs4796856 | XP_171855 | S | P | SP | probably damaging |
| rs4797919 | XP_496268 | V | M | VM | benign            |
| rs4798040 | NP_114437 | L | V | LV | benign            |
| rs4798791 | NP_056023 | K | R | KR | benign            |
| rs4799078 | NP_004706 | S | F | SF | possibly damaging |
| rs4799078 | NP_430255 | S | F | SF | probably damaging |
| rs4799570 | NP_817123 | I | L | IL | benign            |
| rs4800091 | XP_371115 | V | I | VI | benign            |
| rs4800502 | XP_497583 | K | E | KE | benign            |
| rs4801177 | XP_371198 | T | I | TI | benign            |
| rs4801296 | XP_292723 | V | I | VI | benign            |
| rs4801478 | NP_690873 | T | A | TA | benign            |
| rs4801690 | XP_292724 | Q | R | QR | benign            |
| rs4801795 | NP_002143 | D | H | DH | possibly damaging |
| rs4801844 | XP_292779 | S | A | SA | benign            |
| rs4801958 | NP_079009 | I | V | IV | benign            |
| rs4801959 | NP_079009 | R | H | RH | benign            |
| rs4802029 | NP_057620 | L | H | LH | probably damaging |
| rs4802472 | NP_000531 | T | M | TM | benign            |
| rs4802584 | NP_000531 | Q | E | QE | benign            |
| rs4802599 | NP_055234 | R | Q | RQ | benign            |
| rs4802609 | NP_699160 | V | E | VE | benign            |
| rs4802702 | NP_653295 | E | G | EG | benign            |
| rs4802965 | NP_689685 | I | V | IV | benign            |
| rs4803125 | XP_496323 | E | K | EK | benign            |
| rs4803127 | XP_496323 | K | Q | KQ | benign            |
| rs4803149 | XP_209163 | R | G | RG | probably damaging |

|           |           |   |   |    |                   |
|-----------|-----------|---|---|----|-------------------|
| rs4803150 | XP_209163 | I | M | IM | possibly damaging |
| rs4803794 | NP_008987 | E | K | EK | benign            |
| rs4803932 | NP_071907 | D | N | DN | benign            |
| rs4804063 | NP_115823 | S | G | SG | benign            |
| rs4804079 | NP_848620 | N | H | NH | probably damaging |
| rs4804271 | NP_115823 | N | D | ND | benign            |
| rs4804305 | NP_115528 | K | Q | KQ | benign            |
| rs4804401 | XP_372708 | F | V | FV | possibly damaging |
| rs4804773 | NP_001993 | R | W | RW | benign            |
| rs4805157 | XP_496306 | S | W | SW | possibly damaging |
| rs4805162 | NP_689690 | T | I | TI | benign            |
| rs4805206 | NP_689492 | V | I | VI | benign            |
| rs4805206 | NP_954577 | V | I | VI | benign            |
| rs4805664 | NP_065907 | P | L | PL | probably damaging |
| rs4806132 | NP_005295 | L | V | LV | benign            |
| rs4806132 | NP_005296 | L | V | LV | benign            |
| rs4806163 | NP_201574 | A | V | AV | benign            |
| rs4806213 | NP_004637 | N | S | NS | benign            |
| rs4806589 | NP_036446 | T | S | TS | benign            |
| rs4806589 | NP_839942 | T | S | TS | benign            |
| rs4806590 | NP_036446 | K | R | KR | benign            |
| rs4806590 | NP_839942 | K | R | KR | benign            |
| rs4807054 | NP_002025 | T | M | TM | possibly damaging |
| rs4807056 | XP_375560 | A | S | AS | benign            |
| rs4807145 | NP_065746 | P | S | PS | benign            |
| rs4807399 | XP_290850 | R | W | RW | possibly damaging |
| rs4807595 | XP_375558 | G | S | GS | benign            |
| rs4807597 | XP_375558 | V | A | VA | benign            |
| rs4807697 | NP_570923 | R | C | RC | benign            |
| rs4807697 | NP_570924 | R | C | RC | benign            |
| rs4807697 | NP_570925 | R | C | RC | benign            |
| rs4807697 | NP_002841 | R | C | RC | benign            |
| rs4807840 | NP_112186 | A | V | AV | benign            |
| rs4807897 | XP_290854 | L | P | LP | benign            |
| rs4807916 | NP_001965 | M | T | MT | benign            |
| rs4807982 | XP_371145 | Q | H | QH | probably damaging |
| rs4807986 | XP_371145 | W | R | WR | benign            |
| rs4808209 | NP_149981 | M | L | ML | possibly damaging |
| rs4808323 | XP_377521 | T | M | TM | benign            |
| rs4808382 | NP_039228 | A | V | AV | benign            |
| rs4808383 | NP_039228 | G | R | GR | probably damaging |
| rs4808551 | NP_056507 | T | M | TM | benign            |
| rs4808756 | NP_006323 | M | V | MV | benign            |
| rs4808863 | NP_001483 | V | A | VA | benign            |
| rs4808907 | NP_055699 | S | G | SG | benign            |
| rs4809401 | NP_005277 | Q | R | QR | benign            |

|           |           |   |   |    |                   |
|-----------|-----------|---|---|----|-------------------|
| rs4811236 | NP_110517 | N | D | ND | benign            |
| rs4814111 | NP_536737 | G | R | GR | probably damaging |
| rs4814640 | NP_848572 | N | D | ND | benign            |
| rs4814752 | NP_006457 | P | S | PS | benign            |
| rs4816782 | XP_371409 | D | E | DE | probably damaging |
| rs4816815 | XP_497774 | L | P | LP | probably damaging |
| rs4817617 | NP_008864 | K | Q | KQ | benign            |
| rs4817788 | NP_005119 | C | G | CG | benign            |
| rs4818448 | NP_778146 | R | Q | RQ | benign            |
| rs4818742 | NP_478070 | P | L | PL | benign            |
| rs4818842 | NP_006022 | S | G | SG | benign            |
| rs4818947 | NP_859016 | T | P | TP | probably damaging |
| rs4818948 | NP_859016 | C | S | CS | probably damaging |
| rs4818949 | NP_859016 | Q | P | QP | possibly damaging |
| rs4818950 | NP_859016 | V | M | VM | benign            |
| rs4819002 | NP_478070 | V | L | VL | benign            |
| rs4819522 | NP_542377 | T | M | TM | benign            |
| rs4819756 | NP_057419 | R | W | RW | probably damaging |
| rs4820682 | XP_377713 | A | T | AT | benign            |
| rs4820723 | NP_659479 | N | S | NS | probably damaging |
| rs4820853 | NP_777635 | I | T | IT | possibly damaging |
| rs4820889 | NP_000346 | R | Q | RQ | benign            |
| rs4820935 | NP_008863 | A | P | AP | benign            |
| rs4820935 | NP_599031 | A | P | AP | benign            |
| rs4820935 | NP_599032 | A | P | AP | benign            |
| rs4822063 | NP_004590 | G | A | GA | benign            |
| rs4822528 | XP_496520 | H | R | HR | probably damaging |
| rs4823027 | NP_005234 | P | T | PT | possibly damaging |
| rs4823054 | NP_115580 | R | Q | RQ | benign            |
| rs4823086 | NP_114143 | R | H | RH | benign            |
| rs4823496 | NP_006062 | I | M | IM | benign            |
| rs4823561 | NP_055061 | C | R | CR | probably damaging |
| rs4823850 | NP_055061 | S | W | SW | possibly damaging |
| rs4824462 | NP_079135 | L | F | LF | benign            |
| rs4824675 | NP_066295 | E | Q | EQ | benign            |
| rs4824675 | NP_783729 | E | Q | EQ | benign            |
| rs4825262 | NP_003150 | P | S | PS | possibly damaging |
| rs4826245 | NP_000043 | K | E | KE | benign            |
| rs4826957 | NP_005368 | S | T | ST | benign            |
| rs4827331 | NP_620135 | I | V | IV | benign            |
| rs4829799 | NP_061136 | S | L | SL | benign            |
| rs4830210 | NP_659404 | R | T | RT | benign            |
| rs4830842 | XP_045705 | G | D | GD | possibly damaging |
| rs4831823 | XP_372028 | C | Y | CY | probably damaging |
| rs4831823 | XP_372030 | Y | C | YC | probably damaging |
| rs4832168 | NP_060220 | G | R | GR | possibly damaging |



|           |           |   |   |    |                   |
|-----------|-----------|---|---|----|-------------------|
| rs4832169 | NP_060220 | A | V | AV | benign            |
| rs4832524 | NP_002243 | T | A | TA | benign            |
| rs4833069 | NP_056045 | R | Q | RQ | benign            |
| rs4833069 | NP_631921 | R | Q | RQ | benign            |
| rs4833095 | NP_003254 | N | S | NS | possibly damaging |
| rs4835657 | NP_006781 | E | D | ED | benign            |
| rs4836619 | NP_003002 | L | V | LV | benign            |
| rs4836639 | NP_066954 | R | Q | RQ | benign            |
| rs4836639 | NP_821067 | R | Q | RQ | benign            |
| rs4836639 | NP_821068 | R | Q | RQ | benign            |
| rs4836639 | NP_821070 | R | Q | RQ | benign            |
| rs4836822 | NP_060719 | Q | E | QE | benign            |
| rs4836891 | XP_373313 | R | Q | RQ | benign            |
| rs4837178 | NP_659402 | Y | C | YC | possibly damaging |
| rs4837768 | NP_060719 | V | L | VL | benign            |
| rs4838012 | XP_373315 | C | Y | CY | possibly damaging |
| rs4838544 | NP_065574 | M | V | MV | possibly damaging |
| rs4838544 | NP_066266 | M | V | MV | possibly damaging |
| rs4838544 | NP_066265 | M | V | MV | possibly damaging |
| rs4838544 | NP_066264 | M | V | MV | possibly damaging |
| rs4838864 | NP_065194 | L | V | LV | benign            |
| rs4838865 | NP_065194 | S | L | SL | benign            |
| rs4839131 | XP_497697 | D | N | DN | possibly damaging |
| rs4839469 | NP_620409 | A | T | AT | benign            |
| rs4840953 | XP_291277 | S | C | SC | benign            |
| rs4840955 | XP_291277 | P | L | PL | benign            |
| rs4841433 | NP_113627 | T | S | TS | benign            |
| rs4841520 | NP_473369 | R | C | RC | possibly damaging |
| rs4842390 | NP_003616 | R | H | RH | benign            |
| rs4842838 | NP_997400 | L | V | LV | benign            |
| rs4843074 | NP_009131 | P | A | PA | possibly damaging |
| rs4843074 | NP_006729 | P | A | PA | possibly damaging |
| rs4843075 | NP_009131 | D | N | DN | benign            |
| rs4843075 | NP_006729 | D | N | DN | benign            |
| rs4843978 | XP_497522 | P | L | PL | probably damaging |
| rs4844036 | NP_115897 | T | A | TA | benign            |
| rs4844573 | NP_000706 | I | T | IT | benign            |
| rs4844609 | NP_000642 | S | T | ST | benign            |
| rs4844609 | NP_000564 | S | T | ST | benign            |
| rs4844658 | NP_079455 | G | E | GE | possibly damaging |
| rs4844976 | XP_498755 | K | Q | KQ | benign            |
| rs4845403 | NP_653223 | R | W | RW | possibly damaging |
| rs4845839 | XP_088797 | T | S | TS | benign            |
| rs4845880 | XP_209234 | R | Q | RQ | benign            |
| rs4845881 | XP_209234 | R | Q | RQ | benign            |
| rs4845898 | NP_056193 | E | V | EV | possibly damaging |

|           |           |   |   |    |                   |
|-----------|-----------|---|---|----|-------------------|
| rs4845920 | XP_291395 | M | V | MV | possibly damaging |
| rs4846042 | XP_209234 | D | A | DA | benign            |
| rs4848158 | NP_115766 | R | T | RT | possibly damaging |
| rs4849167 | NP_036587 | G | A | GA | benign            |
| rs4850168 | XP_292982 | Y | F | YF | benign            |
| rs4850168 | XP_371558 | Y | F | YF | benign            |
| rs4850169 | XP_292982 | A | V | AV | benign            |
| rs4850169 | XP_371558 | A | V | AV | benign            |
| rs4851287 | NP_940863 | P | L | PL | probably damaging |
| rs4852764 | NP_005782 | A | T | AT | benign            |
| rs4854235 | NP_653306 | T | M | TM | possibly damaging |
| rs4855271 | NP_001032 | I | M | IM | possibly damaging |
| rs4855576 | NP_055244 | I | F | IF | benign            |
| rs4857276 | XP_496653 | A | V | AV | benign            |
| rs4857302 | XP_376254 | N | H | NH | benign            |
| rs4858097 | NP_005117 | M | L | ML | possibly damaging |
| rs4859571 | NP_055250 | V | I | VI | benign            |
| rs4859596 | NP_005400 | N | S | NS | benign            |
| rs4859905 | NP_065926 | G | D | GD | possibly damaging |
| rs4859905 | NP_116252 | G | D | GD | possibly damaging |
| rs4859905 | NP_996672 | G | D | GD | possibly damaging |
| rs4860273 | XP_291095 | R | H | RH | possibly damaging |
| rs4860274 | XP_291095 | S | C | SC | possibly damaging |
| rs4860275 | XP_291095 | N | D | ND | benign            |
| rs4862093 | XP_371717 | A | V | AV | benign            |
| rs4862155 | NP_079225 | A | T | AT | benign            |
| rs4862650 | XP_496727 | K | E | KE | benign            |
| rs4862653 | XP_496727 | K | E | KE | benign            |
| rs4863314 | XP_377136 | P | L | PL | benign            |
| rs4865615 | NP_775785 | T | S | TS | benign            |
| rs4865757 | NP_002194 | Y | D | YD | probably damaging |
| rs4867440 | NP_057191 | V | I | VI | benign            |
| rs4868592 | XP_371783 | V | G | VG | possibly damaging |
| rs4868592 | NP_775934 | V | G | VG | possibly damaging |
| rs4870093 | NP_149062 | V | I | VI | benign            |
| rs4870093 | NP_892006 | V | I | VI | benign            |
| rs4870723 | XP_044622 | N | H | NH | benign            |
| rs4871827 | NP_073620 | S | N | SN | benign            |
| rs4871866 | NP_002309 | S | R | SR | benign            |
| rs4872318 | NP_689775 | V | I | VI | benign            |
| rs4873802 | NP_055932 | A | S | AS | benign            |
| rs4874084 | XP_376800 | N | D | ND | benign            |
| rs4874147 | NP_055932 | G | S | GS | benign            |
| rs4878199 | NP_000683 | V | M | VM | possibly damaging |
| rs4878271 | XP_372163 | S | F | SF | possibly damaging |
| rs4878271 | XP_372097 | S | F | SF | possibly damaging |

|           |           |   |   |    |                   |
|-----------|-----------|---|---|----|-------------------|
| rs4879079 | XP_497024 | S | R | SR | benign            |
| rs4879860 | NP_690577 | W | C | WC | probably damaging |
| rs4879860 | NP_116023 | W | C | WC | probably damaging |
| rs4880139 | NP_945184 | S | P | SP | benign            |
| rs4880287 | XP_495853 | R | S | RS | benign            |
| rs4880288 | XP_495853 | I | L | IL | benign            |
| rs4880433 | NP_060079 | T | A | TA | benign            |
| rs4880608 | NP_817124 | L | F | LF | benign            |
| rs4880718 | NP_001809 | Q | R | QR | benign            |
| rs4881159 | NP_817124 | N | D | ND | benign            |
| rs4881425 | XP_497211 | Y | C | YC | probably damaging |
| rs4883263 | NP_981961 | V | I | VI | benign            |
| rs4883263 | NP_004235 | V | I | VI | benign            |
| rs4883918 | NP_055768 | S | N | SN | benign            |
| rs4884021 | NP_005349 | V | I | VI | benign            |
| rs4886730 | NP_001888 | R | Q | RQ | benign            |
| rs4887662 | XP_497500 | W | R | WR | possibly damaging |
| rs4889261 | NP_877417 | L | P | LP | benign            |
| rs4889523 | XP_497494 | R | P | RP | probably damaging |
| rs4889548 | XP_496143 | F | V | FV | benign            |
| rs4889891 | NP_065700 | G | V | GV | possibly damaging |
| rs4890762 | XP_497579 | G | E | GE | possibly damaging |
| rs4891392 | NP_775901 | F | S | FS | possibly damaging |
| rs4893853 | NP_596870 | K | R | KR | benign            |
| rs4894048 | NP_596870 | G | S | GS | benign            |
| rs4895362 | NP_005500 | S | N | SN | benign            |
| rs4895944 | NP_511043 | M | L | ML | benign            |
| rs4900130 | NP_705933 | V | I | VI | benign            |
| rs4900130 | NP_705934 | V | I | VI | benign            |
| rs4901284 | XP_056434 | T | I | TI | benign            |
| rs4902099 | NP_114120 | Q | R | QR | benign            |
| rs4902176 | NP_647479 | A | T | AT | benign            |
| rs4902283 | NP_005947 | P | L | PL | possibly damaging |
| rs4902834 | XP_027236 | P | A | PA | benign            |
| rs4903104 | XP_370765 | T | M | TM | possibly damaging |
| rs4903576 | XP_370769 | K | E | KE | benign            |
| rs4904210 | NP_006185 | A | P | AP | benign            |
| rs4904448 | NP_060888 | D | N | DN | benign            |
| rs4905081 | NP_065869 | V | I | VI | benign            |
| rs4905937 | NP_996801 | T | A | TA | benign            |
| rs4907250 | NP_951060 | A | V | AV | benign            |
| rs4907250 | NP_060093 | A | V | AV | benign            |
| rs4907817 | XP_497139 | I | V | IV | benign            |
| rs4908862 | NP_000974 | N | T | NT | possibly damaging |
| rs4908923 | NP_078930 | R | W | RW | possibly damaging |
| rs4909951 | NP_065697 | R | L | RL | possibly damaging |

|           |           |   |   |    |                   |
|-----------|-----------|---|---|----|-------------------|
| rs4910755 | XP_372353 | K | T | KT | benign            |
| rs4910756 | XP_372353 | N | S | NS | possibly damaging |
| rs4911287 | NP_777557 | S | G | SG | benign            |
| rs4911290 | NP_872599 | V | M | VM | benign            |
| rs4911494 | NP_060714 | R | Q | RQ | benign            |
| rs4911494 | NP_955781 | R | Q | RQ | benign            |
| rs4912470 | NP_061092 | A | G | AG | benign            |
| rs4912751 | NP_114479 | I | V | IV | benign            |
| rs4912751 | NP_061736 | I | V | IV | benign            |
| rs4915154 | NP_002829 | T | A | TA | benign            |
| rs4915212 | NP_000060 | R | H | RH | possibly damaging |
| rs4915691 | XP_375737 | S | N | SN | benign            |
| rs4916104 | XP_372825 | C | R | CR | benign            |
| rs4916129 | XP_372827 | D | N | DN | benign            |
| rs4916130 | XP_372827 | C | F | CF | probably damaging |
| rs4916373 | NP_848622 | V | I | VI | benign            |
| rs4916589 | NP_079439 | R | Q | RQ | benign            |
| rs4918857 | NP_006166 | L | Q | LQ | possibly damaging |
| rs4918857 | NP_932326 | L | Q | LQ | possibly damaging |
| rs4919608 | NP_079023 | E | D | ED | benign            |
| rs4919645 | NP_079065 | A | S | AS | benign            |
| rs4920246 | NP_005637 | S | G | SG | benign            |
| rs4921637 | NP_071354 | E | G | EG | benign            |
| rs4923930 | NP_056104 | F | V | FV | possibly damaging |
| rs4924595 | NP_940844 | N | S | NS | benign            |
| rs4924858 | XP_371028 | R | T | RT | benign            |
| rs4925229 | NP_005551 | T | A | TA | benign            |
| rs4925663 | XP_060580 | G | D | GD | possibly damaging |
| rs4925856 | NP_038460 | P | L | PL | probably damaging |
| rs4926219 | NP_002732 | I | V | IV | benign            |
| rs4926219 | NP_998725 | I | V | IV | benign            |
| rs4926472 | XP_114067 | P | L | PL | benign            |
| rs4926581 | XP_208213 | V | F | VF | benign            |
| rs4926600 | XP_208213 | L | F | LF | benign            |
| rs4926885 | XP_496363 | A | G | AG | possibly damaging |
| rs4926893 | NP_001972 | N | K | NK | possibly damaging |
| rs4927413 | XP_371534 | E | K | EK | benign            |
| rs4927611 | NP_000538 | A | S | AS | benign            |
| rs4927611 | NP_783650 | A | S | AS | benign            |
| rs4927611 | NP_783651 | A | S | AS | benign            |
| rs4927611 | NP_783652 | A | S | AS | benign            |
| rs4927772 | XP_171032 | I | V | IV | benign            |
| rs4929762 | NP_954714 | P | R | PR | probably damaging |
| rs4929858 | XP_497279 | V | D | VD | possibly damaging |
| rs4929982 | NP_055370 | R | Q | RQ | benign            |
| rs4930142 | NP_066957 | D | N | DN | benign            |

|           |              |   |   |    |                   |
|-----------|--------------|---|---|----|-------------------|
| rs4930199 | NP_003968    | R | Q | RQ | possibly damaging |
| rs4930388 | NP_008877    | G | S | GS | benign            |
| rs4930409 | NP_055393    | R | C | RC | probably damaging |
| rs4930695 | NP_005459    | S | L | SL | benign            |
| rs4930729 | NP_997321    | V | L | VL | benign            |
| rs4930979 | NP_659410    | R | K | RK | benign            |
| rs4931804 | XP_496026    | V | I | VI | benign            |
| rs4931827 | XP_496034    | R | C | RC | benign            |
| rs4931912 | XP_496026    | Q | R | QR | benign            |
| rs4931913 | XP_496026    | M | T | MT | benign            |
| rs4932305 | NP_064595    | M | I | MI | benign            |
| rs4932305 | NP_945119    | M | I | MI | benign            |
| rs4932380 | XP_370908    | A | S | AS | benign            |
| rs4932713 | XP_497618    | G | D | GD | benign            |
| rs4933050 | NP_037371    | A | V | AV | benign            |
| rs4933050 | NP_955358    | A | V | AV | benign            |
| rs4934281 | NP_079032    | D | H | DH | benign            |
| rs4935425 | XP_350781    | R | G | RG | benign            |
| rs4935502 | NP_149045    | D | A | DA | benign            |
| rs4935898 | XP_370663    | V | M | VM | benign            |
| rs4936429 | NP_000723    | A | S | AS | benign            |
| rs4936880 | XP_372436    | R | G | RG | probably damaging |
| rs4936881 | XP_372436    | K | Q | KQ | possibly damaging |
| rs4936919 | XP_208543    | L | P | LP | possibly damaging |
| rs4937586 | XP_374949    | L | R | LR | possibly damaging |
| rs4938016 | NP_848605    | G | R | GR | possibly damaging |
| rs4938063 | NP_998786    | S | N | SN | benign            |
| rs4938063 | NP_000860    | S | N | SN | benign            |
| rs4938895 | XP_372409    | C | R | CR | possibly damaging |
| rs4938915 | XP_291885    | A | T | AT | probably damaging |
| rs4939078 | XP_372401    | S | T | ST | benign            |
| rs4940019 | NP_114145    | R | S | RS | benign            |
| rs4940404 | NP_443179    | N | K | NK | benign            |
| rs4940790 | XP_497591    | R | P | RP | benign            |
| rs4941543 | NP_002289    | E | K | EK | benign            |
| rs4942848 | NP_060661    | V | A | VA | benign            |
| rs4944960 | XP_374912    | T | R | TR | benign            |
| rs4945256 | NP_689776    | P | L | PL | probably damaging |
| rs4945256 | NP_060642    | P | L | PL | probably damaging |
| rs4946188 | NP_659499    | D | N | DN | possibly damaging |
| rs4946977 | NP_073602    | A | T | AT | benign            |
| rs4947334 | NP_000583    | H | P | HP | probably damaging |
| rs4947334 | NP_001002029 | H | P | HP | probably damaging |
| rs4947338 | NP_006772    | L | W | LW | benign            |
| rs4948970 | XP_372311    | N | H | NH | benign            |
| rs4949184 | XP_375712    | D | N | DN | benign            |

|           |           |   |   |    |                   |
|-----------|-----------|---|---|----|-------------------|
| rs4950394 | NP_004275 | S | A | SA | benign            |
| rs4950516 | XP_034717 | A | V | AV | benign            |
| rs4950532 | XP_034717 | S | I | SI | benign            |
| rs4951164 | NP_005067 | P | L | PL | benign            |
| rs4951168 | NP_976310 | R | Q | RQ | benign            |
| rs4953961 | XP_497879 | K | T | KT | benign            |
| rs4954449 | NP_002290 | I | V | IV | benign            |
| rs4954474 | XP_046570 | D | E | DE | benign            |
| rs4955216 | XP_496634 | R | L | RL | possibly damaging |
| rs4955217 | XP_496634 | R | C | RC | probably damaging |
| rs4955418 | NP_075054 | R | W | RW | benign            |
| rs4955419 | NP_075054 | L | Q | LQ | benign            |
| rs4956145 | NP_005318 | P | L | PL | probably damaging |
| rs4956462 | XP_093895 | Y | F | YF | benign            |
| rs4956987 | NP_443141 | R | Q | RQ | possibly damaging |
| rs4958531 | NP_064552 | M | V | MV | benign            |
| rs4958532 | NP_064552 | P | L | PL | possibly damaging |
| rs4958535 | NP_064552 | S | T | ST | benign            |
| rs4959083 | NP_115859 | S | N | SN | benign            |
| rs4959084 | NP_115859 | D | N | DN | benign            |
| rs4959086 | NP_115859 | C | W | CW | probably damaging |
| rs4960809 | XP_496985 | A | V | AV | benign            |
| rs4961206 | NP_061971 | T | P | TP | possibly damaging |
| rs4961490 | NP_060107 | L | V | LV | benign            |
| rs4962173 | NP_115925 | A | T | AT | benign            |
| rs4962237 | NP_689499 | N | D | ND | possibly damaging |
| rs4962930 | XP_496692 | F | L | FL | benign            |
| rs4962931 | XP_496692 | V | L | VL | benign            |
| rs4963182 | NP_076436 | D | H | DH | benign            |
| rs4963198 | NP_932341 | R | H | RH | benign            |
| rs4963245 | NP_775857 | R | G | RG | probably damaging |
| rs4964460 | NP_689985 | A | T | AT | benign            |
| rs4964912 | NP_079491 | E | K | EK | benign            |
| rs4965409 | XP_497472 | S | L | SL | benign            |
| rs4965539 | NP_919271 | L | V | LV | benign            |
| rs4965923 | XP_497472 | R | S | RS | benign            |
| rs4965958 | XP_497472 | L | M | LM | benign            |
| rs4968104 | NP_056536 | V | E | VE | benign            |
| rs4968281 | NP_003387 | M | T | MT | possibly damaging |
| rs4968318 | NP_689560 | V | I | VI | benign            |
| rs4968502 | XP_496235 | A | V | AV | benign            |
| rs4968839 | NP_525023 | V | I | VI | benign            |
| rs4968839 | NP_758854 | V | I | VI | benign            |
| rs4968849 | NP_525021 | M | T | MT | benign            |
| rs4969391 | NP_059345 | Q | R | QR | benign            |
| rs4970170 | XP_377778 | H | R | HR | benign            |

|           |           |   |   |    |                   |
|-----------|-----------|---|---|----|-------------------|
| rs4970471 | NP_443175 | T | K | TK | benign            |
| rs4971007 | NP_112175 | T | P | TP | possibly damaging |
| rs4971053 | NP_060959 | A | T | AT | benign            |
| rs4972064 | XP_371511 | R | T | RT | possibly damaging |
| rs4972450 | NP_003378 | P | L | PL | possibly damaging |
| rs4973588 | NP_062824 | T | M | TM | benign            |
| rs4974539 | XP_209550 | W | R | WR | benign            |
| rs4975017 | NP_783864 | Q | K | QK | benign            |
| rs4975396 | XP_496692 | N | H | NH | possibly damaging |
| rs4976482 | NP_065122 | Y | S | YS | possibly damaging |
| rs4977881 | NP_060264 | E | K | EK | benign            |
| rs4978584 | NP_056219 | A | T | AT | benign            |
| rs4978872 | NP_671492 | K | Q | KQ | benign            |
| rs4978872 | NP_009134 | K | Q | KQ | benign            |
| rs4979794 | NP_004738 | A | V | AV | benign            |
| rs4980895 | NP_115734 | S | R | SR | benign            |
| rs4980999 | NP_757365 | R | C | RC | benign            |
| rs4980999 | NP_705720 | R | C | RC | benign            |
| rs4980999 | NP_757380 | R | C | RC | benign            |
| rs4980999 | NP_757364 | R | C | RC | benign            |
| rs4980999 | NP_757363 | R | C | RC | benign            |
| rs4980999 | NP_006540 | R | C | RC | probably damaging |
| rs4981242 | XP_063202 | D | A | DA | benign            |
| rs4981437 | NP_005006 | R | W | RW | probably damaging |
| rs4981473 | NP_000248 | E | Q | EQ | benign            |
| rs4981500 | NP_777573 | T | I | TI | benign            |
| rs4982051 | NP_009041 | S | L | SL | benign            |
| rs4982419 | XP_372509 | L | F | LF | benign            |
| rs4982685 | NP_851312 | V | A | VA | benign            |
| rs4982685 | NP_851313 | V | A | VA | benign            |
| rs4982685 | NP_851824 | V | A | VA | benign            |
| rs4982685 | NP_848026 | V | A | VA | benign            |
| rs4982715 | NP_060285 | Y | S | YS | probably damaging |
| rs4982766 | XP_033370 | V | A | VA | benign            |
| rs4983380 | NP_071934 | T | A | TA | benign            |
| rs4983659 | XP_496026 | D | N | DN | benign            |
| rs4983736 | XP_378494 | Q | P | QP | possibly damaging |
| rs4984040 | XP_496028 | N | I | NI | benign            |
| rs4984041 | XP_496028 | T | A | TA | benign            |
| rs4984636 | NP_066921 | V | A | VA | benign            |
| rs4984638 | NP_036599 | W | S | WS | probably damaging |
| rs4984948 | NP_073610 | P | R | PR | probably damaging |
| rs4985162 | NP_055842 | P | L | PL | benign            |
| rs4985866 | NP_066292 | I | V | IV | benign            |
| rs4986761 | NP_000042 | S | P | SP | benign            |
| rs4986764 | NP_114432 | P | S | PS | benign            |

|           |           |   |   |    |                   |
|-----------|-----------|---|---|----|-------------------|
| rs4986771 | NP_067645 | S | P | SP | benign            |
| rs4986782 | NP_000240 | R | C | RC | probably damaging |
| rs4986783 | NP_000653 | S | A | SA | benign            |
| rs4986790 | NP_612567 | D | G | DG | benign            |
| rs4986790 | NP_612566 | D | G | DG | possibly damaging |
| rs4986791 | NP_612567 | T | I | TI | benign            |
| rs4986791 | NP_612566 | T | I | TI | possibly damaging |
| rs4986818 | NP_006428 | P | L | PL | probably damaging |
| rs4986822 | NP_006428 | S | T | ST | benign            |
| rs4986826 | NP_001612 | V | I | VI | benign            |
| rs4986845 | NP_009230 | N | D | ND | benign            |
| rs4986845 | NP_009231 | N | D | ND | benign            |
| rs4986845 | NP_009232 | N | D | ND | benign            |
| rs4986845 | NP_009233 | N | D | ND | possibly damaging |
| rs4986845 | NP_009228 | N | D | ND | possibly damaging |
| rs4986847 | NP_009230 | I | L | IL | benign            |
| rs4986847 | NP_009231 | I | L | IL | benign            |
| rs4986847 | NP_009232 | I | L | IL | benign            |
| rs4986847 | NP_009233 | I | L | IL | benign            |
| rs4986847 | NP_009228 | I | L | IL | benign            |
| rs4986848 | NP_009230 | F | S | FS | benign            |
| rs4986848 | NP_009231 | F | S | FS | benign            |
| rs4986848 | NP_009232 | F | S | FS | benign            |
| rs4986848 | NP_009233 | F | S | FS | benign            |
| rs4986848 | NP_009228 | F | S | FS | benign            |
| rs4986849 | NP_009229 | R | Q | RQ | benign            |
| rs4986849 | NP_009230 | R | Q | RQ | benign            |
| rs4986849 | NP_009231 | R | Q | RQ | benign            |
| rs4986849 | NP_009232 | R | Q | RQ | benign            |
| rs4986849 | NP_009233 | R | Q | RQ | benign            |
| rs4986849 | NP_009234 | R | Q | RQ | benign            |
| rs4986849 | NP_009236 | R | Q | RQ | benign            |
| rs4986849 | NP_009228 | R | Q | RQ | benign            |
| rs4986849 | NP_009235 | R | Q | RQ | benign            |
| rs4986850 | NP_009230 | D | N | DN | benign            |
| rs4986850 | NP_009231 | D | N | DN | benign            |
| rs4986850 | NP_009232 | D | N | DN | benign            |
| rs4986850 | NP_009233 | D | N | DN | benign            |
| rs4986850 | NP_009228 | D | N | DN | benign            |
| rs4986852 | NP_009230 | S | N | SN | benign            |
| rs4986852 | NP_009231 | S | N | SN | benign            |
| rs4986852 | NP_009232 | S | N | SN | benign            |
| rs4986852 | NP_009233 | S | N | SN | benign            |
| rs4986852 | NP_009228 | S | N | SN | benign            |
| rs4986854 | NP_009229 | M | T | MT | possibly damaging |
| rs4986854 | NP_009233 | M | T | MT | possibly damaging |



|           |           |   |   |    |                   |
|-----------|-----------|---|---|----|-------------------|
| rs4986854 | NP_009234 | M | T | MT | possibly damaging |
| rs4986854 | NP_009236 | M | T | MT | possibly damaging |
| rs4986854 | NP_009228 | M | T | MT | possibly damaging |
| rs4986854 | NP_009235 | M | T | MT | probably damaging |
| rs4986859 | NP_000050 | N | D | ND | possibly damaging |
| rs4986860 | NP_000050 | H | R | HR | probably damaging |
| rs4986866 | NP_510867 | P | L | PL | probably damaging |
| rs4986867 | NP_510867 | F | L | FL | possibly damaging |
| rs4986871 | NP_009294 | A | V | AV | benign            |
| rs4986887 | NP_000095 | D | H | DH | possibly damaging |
| rs4986888 | NP_000095 | A | G | AG | benign            |
| rs4986891 | NP_000753 | R | Q | RQ | probably damaging |
| rs4986893 | NP_000760 | W | C | WC | probably damaging |
| rs4986907 | NP_059488 | R | Q | RQ | benign            |
| rs4986908 | NP_059488 | D | N | DN | benign            |
| rs4986909 | NP_059488 | P | L | PL | probably damaging |
| rs4986910 | NP_059488 | M | T | MT | probably damaging |
| rs4986913 | NP_059488 | P | S | PS | benign            |
| rs4986933 | NP_005227 | A | D | AD | possibly damaging |
| rs4986939 | NP_004620 | S | L | SL | benign            |
| rs4986940 | NP_004620 | P | S | PS | possibly damaging |
| rs4986941 | NP_067674 | M | V | MV | benign            |
| rs4986948 | NP_000843 | T | S | TS | benign            |
| rs4986949 | NP_000843 | D | Y | DY | probably damaging |
| rs4986950 | NP_620574 | T | I | TI | benign            |
| rs4986950 | NP_620578 | T | I | TI | benign            |
| rs4986950 | NP_620579 | T | I | TI | benign            |
| rs4986950 | NP_000401 | T | I | TI | benign            |
| rs4986950 | NP_620573 | T | I | TI | possibly damaging |
| rs4986950 | NP_620576 | T | I | TI | possibly damaging |
| rs4986952 | NP_000853 | R | I | RI | probably damaging |
| rs4986954 | NP_000189 | D | N | DN | benign            |
| rs4986956 | NP_000865 | F | S | FS | benign            |
| rs4986956 | NP_997467 | F | S | FS | benign            |
| rs4986956 | NP_997468 | F | S | FS | benign            |
| rs4986958 | NP_005525 | T | R | TR | benign            |
| rs4986964 | NP_758858 | C | R | CR | probably damaging |
| rs4986964 | NP_000580 | C | R | CR | probably damaging |
| rs4986970 | NP_000220 | S | T | ST | benign            |
| rs4986973 | NP_039269 | P | S | PS | benign            |
| rs4986974 | NP_002302 | K | T | KT | benign            |
| rs4986974 | NP_039269 | K | T | KT | possibly damaging |
| rs4986996 | NP_000006 | D | N | DN | probably damaging |
| rs4986997 | NP_000006 | L | F | LF | possibly damaging |
| rs4986998 | NP_000894 | R | W | RW | benign            |
| rs4987023 | NP_000627 | G | R | GR | benign            |

|           |           |   |   |    |                   |
|-----------|-----------|---|---|----|-------------------|
| rs4987024 | NP_803564 | Y | F | YF | possibly damaging |
| rs4987024 | NP_001045 | Y | F | YF | possibly damaging |
| rs4987042 | NP_067645 | I | T | IT | benign            |
| rs4987046 | NP_000050 | Y | C | YC | probably damaging |
| rs4987047 | NP_000050 | I | F | IF | possibly damaging |
| rs4987048 | NP_000050 | D | N | DN | possibly damaging |
| rs4987051 | NP_000379 | P | T | PT | possibly damaging |
| rs4987052 | NP_000638 | L | V | LV | benign            |
| rs4987052 | NP_000639 | L | V | LV | possibly damaging |
| rs4987060 | NP_001970 | P | L | PL | benign            |
| rs4987063 | NP_000114 | V | I | VI | benign            |
| rs4987068 | NP_000225 | R | H | RH | benign            |
| rs4987070 | NP_000225 | D | G | DG | possibly damaging |
| rs4987076 | NP_000653 | V | I | VI | benign            |
| rs4987090 | NP_005422 | A | S | AS | benign            |
| rs4987102 | NP_003730 | A | T | AT | benign            |
| rs4987104 | NP_000688 | E | K | EK | benign            |
| rs4987109 | NP_000029 | S | T | ST | benign            |
| rs4987115 | NP_001179 | A | V | AV | benign            |
| rs4987117 | NP_000050 | T | M | TM | benign            |
| rs4987121 | NP_001227 | M | L | ML | probably damaging |
| rs4987125 | NP_847899 | G | D | GD | benign            |
| rs4987127 | NP_478102 | G | R | GR | possibly damaging |
| rs4987133 | NP_000490 | I | T | IT | probably damaging |
| rs4987161 | NP_059488 | F | S | FS | probably damaging |
| rs4987168 | NP_000114 | Q | R | QR | benign            |
| rs4987176 | NP_000845 | D | N | DN | benign            |
| rs4987181 | NP_000225 | P | L | PL | probably damaging |
| rs4987188 | NP_000242 | G | D | GD | benign            |
| rs4987195 | NP_000653 | T | I | TI | possibly damaging |
| rs4987202 | NP_005044 | T | M | TM | benign            |
| rs4987203 | NP_005044 | R | Q | RQ | benign            |
| rs4987205 | NP_597816 | T | I | TI | possibly damaging |
| rs4987215 | NP_116559 | D | H | DH | possibly damaging |
| rs4987215 | NP_002898 | D | H | DH | possibly damaging |
| rs4987233 | NP_612566 | S | N | SN | benign            |
| rs4987233 | NP_612567 | S | N | SN | benign            |
| rs4987236 | NP_000544 | V | I | VI | benign            |
| rs4987237 | NP_000544 | Q | R | QR | benign            |
| rs4987238 | NP_000544 | L | F | LF | benign            |
| rs4987241 | NP_067645 | M | I | MI | possibly damaging |
| rs4987250 | NP_001391 | S | L | SL | benign            |
| rs4987262 | NP_000951 | R | C | RC | possibly damaging |
| rs4987309 | NP_000646 | E | Q | EQ | benign            |
| rs4987310 | NP_000646 | P | S | PS | benign            |
| rs4987382 | NP_000646 | N | D | ND | benign            |

|           |           |   |   |    |                   |
|-----------|-----------|---|---|----|-------------------|
| rs4987411 | NP_039224 | L | P | LP | probably damaging |
| rs4987657 | NP_061116 | C | R | CR | benign            |
| rs4987667 | NP_061116 | M | V | MV | benign            |
| rs4987682 | NP_061116 | M | T | MT | benign            |
| rs4987945 | NP_000042 | L | V | LV | benign            |
| rs4988111 | NP_612149 | L | P | LP | benign            |
| rs4988111 | NP_000042 | L | P | LP | possibly damaging |
| rs4988125 | NP_612149 | T | I | TI | possibly damaging |
| rs4988125 | NP_000042 | T | I | TI | possibly damaging |
| rs4988283 | NP_005906 | E | K | EK | benign            |
| rs4988321 | NP_002326 | V | M | VM | benign            |
| rs4988345 | NP_114432 | R | C | RC | possibly damaging |
| rs4988346 | NP_114432 | V | I | VI | benign            |
| rs4988347 | NP_114432 | L | P | LP | probably damaging |
| rs4988349 | NP_114432 | Q | L | QL | benign            |
| rs4988350 | NP_114432 | F | V | FV | possibly damaging |
| rs4988355 | NP_114432 | C | Y | CY | probably damaging |
| rs4988356 | NP_114432 | V | G | VG | benign            |
| rs4988459 | NP_000297 | T | S | TS | benign            |
| rs4988465 | NP_001041 | S | L | SL | possibly damaging |
| rs4988466 | NP_001042 | A | V | AV | benign            |
| rs4988469 | NP_001042 | R | C | RC | possibly damaging |
| rs4988471 | NP_001042 | R | H | RH | possibly damaging |
| rs4988474 | NP_001043 | R | C | RC | probably damaging |
| rs4988477 | NP_001043 | V | A | VA | benign            |
| rs4988480 | NP_001044 | A | T | AT | benign            |
| rs4988482 | NP_001044 | G | R | GR | benign            |
| rs4988483 | NP_001044 | L | M | LM | benign            |
| rs4988484 | NP_001044 | A | V | AV | benign            |
| rs4988487 | NP_001044 | P | S | PS | benign            |
| rs4988489 | NP_001044 | R | C | RC | possibly damaging |
| rs4988492 | NP_066567 | L | F | LF | probably damaging |
| rs4988496 | NP_000814 | A | T | AT | benign            |
| rs4988498 | NP_000814 | E | D | ED | benign            |
| rs4988510 | NP_004113 | V | M | VM | benign            |
| rs4988510 | NP_940799 | V | M | VM | benign            |
| rs4988511 | NP_004113 | I | T | IT | possibly damaging |
| rs4988511 | NP_940799 | I | T | IT | possibly damaging |
| rs4988956 | NP_057316 | A | T | AT | benign            |
| rs4988962 | NP_613075 | V | G | VG | benign            |
| rs4988962 | NP_613258 | V | G | VG | benign            |
| rs4988962 | NP_004884 | V | G | VG | benign            |
| rs4988964 | NP_613075 | W | G | WG | possibly damaging |
| rs4988964 | NP_613258 | W | G | WG | possibly damaging |
| rs4988964 | NP_004884 | W | G | WG | possibly damaging |
| rs4989586 | NP_004102 | R | Q | RQ | possibly damaging |

|           |           |   |   |    |                   |
|-----------|-----------|---|---|----|-------------------|
| rs4989587 | NP_004102 | R | W | RW | probably damaging |
| rs4989588 | NP_004102 | L | Q | LQ | possibly damaging |
| rs4990043 | XP_377797 | C | F | CF | benign            |
| rs4990044 | XP_377797 | N | K | NK | probably damaging |
| rs4990121 | XP_166805 | F | L | FL | benign            |
| rs4990194 | XP_372403 | Y | C | YC | possibly damaging |
| rs4990293 | XP_496341 | L | V | LV | benign            |
| rs4990444 | NP_036234 | A | T | AT | benign            |
| rs4990726 | NP_055382 | P | S | PS | possibly damaging |
| rs4990810 | XP_497650 | S | F | SF | possibly damaging |
| rs4990811 | XP_497650 | P | S | PS | benign            |
| rs4990813 | XP_497650 | C | R | CR | possibly damaging |
| rs4990814 | XP_497650 | M | R | MR | benign            |
| rs4990815 | XP_497650 | F | V | FV | benign            |
| rs4990821 | NP_115528 | E | Q | EQ | benign            |
| rs4991448 | NP_958799 | L | P | LP | possibly damaging |
| rs4991751 | NP_114093 | V | I | VI | benign            |
| rs4992185 | XP_291625 | Y | C | YC | possibly damaging |
| rs4992185 | XP_291638 | Y | C | YC | possibly damaging |
| rs4992186 | XP_291625 | Y | H | YH | benign            |
| rs4992186 | XP_291638 | Y | H | YH | benign            |
| rs4992415 | NP_877496 | E | D | ED | benign            |
| rs4992999 | NP_004714 | L | V | LV | benign            |
| rs4993130 | NP_005865 | L | H | LH | benign            |
| rs4993132 | NP_005865 | N | S | NS | benign            |
| rs4993133 | NP_005865 | D | N | DN | benign            |
| rs4993134 | NP_005865 | D | E | DE | benign            |
| rs4993135 | NP_005865 | S | T | ST | benign            |
| rs4993136 | NP_005865 | E | D | ED | benign            |
| rs4994503 | NP_075408 | Q | P | QP | possibly damaging |
| rs4994503 | NP_004073 | Q | P | QP | possibly damaging |
| rs4994504 | NP_075408 | E | A | EA | benign            |
| rs4994504 | NP_004073 | E | A | EA | benign            |
| rs4994540 | NP_073622 | E | D | ED | benign            |
| rs4994540 | NP_942153 | E | D | ED | benign            |
| rs4994541 | NP_073622 | H | P | HP | probably damaging |
| rs4994541 | NP_942153 | H | P | HP | probably damaging |
| rs4994616 | NP_064512 | E | A | EA | possibly damaging |
| rs4994617 | NP_064512 | A | D | AD | possibly damaging |
| rs4994743 | XP_372576 | A | S | AS | benign            |
| rs4994919 | NP_976063 | E | A | EA | benign            |
| rs4994919 | NP_510880 | E | A | EA | possibly damaging |
| rs4994920 | NP_976063 | E | A | EA | benign            |
| rs4994920 | NP_510880 | E | A | EA | benign            |
| rs4995059 | NP_872413 | N | H | NH | benign            |
| rs4995097 | NP_443134 | S | I | SI | benign            |

|           |           |   |   |    |                   |
|-----------|-----------|---|---|----|-------------------|
| rs4995423 | NP_061928 | H | P | HP | probably damaging |
| rs4995424 | NP_061928 | Q | P | QP | benign            |
| rs4995481 | NP_006058 | D | Y | DY | probably damaging |
| rs4995609 | NP_851849 | L | F | LF | benign            |
| rs4995611 | NP_851849 | T | M | TM | benign            |
| rs4995613 | NP_851849 | N | K | NK | benign            |
| rs4995884 | XP_496134 | H | R | HR | possibly damaging |
| rs4995933 | NP_009102 | M | V | MV | possibly damaging |
| rs4996021 | NP_149111 | R | L | RL | possibly damaging |
| rs4996045 | NP_061028 | L | I | LI | benign            |
| rs4996211 | NP_112212 | Q | K | QK | benign            |
| rs4996211 | NP_006501 | Q | K | QK | benign            |
| rs4996268 | XP_496394 | Y | N | YN | probably damaging |
| rs4996483 | NP_620693 | D | Y | DY | possibly damaging |
| rs4996483 | NP_001884 | D | Y | DY | possibly damaging |
| rs4996484 | NP_620693 | S | A | SA | benign            |
| rs4996484 | NP_001884 | S | A | SA | benign            |
| rs4997052 | NP_005505 | Y | F | YF | benign            |
| rs4997217 | NP_009102 | C | G | CG | probably damaging |
| rs4997557 | NP_000753 | T | S | TS | benign            |
| rs4998015 | XP_291625 | C | S | CS | probably damaging |
| rs4998015 | XP_291638 | C | S | CS | probably damaging |
| rs4998340 | XP_372437 | P | Q | PQ | possibly damaging |
| rs4998896 | NP_000488 | R | H | RH | possibly damaging |
| rs4998901 | NP_000488 | P | A | PA | benign            |
| rs4999095 | NP_072049 | H | Q | HQ | benign            |
| rs4999096 | NP_072049 | R | L | RL | benign            |
| rs4999211 | NP_689820 | F | S | FS | benign            |
| rs4999333 | XP_496202 | K | N | KN | possibly damaging |
| rs4999691 | NP_060089 | F | S | FS | probably damaging |
| rs4999806 | NP_116016 | P | L | PL | probably damaging |
| rs4999832 | NP_689844 | V | A | VA | benign            |
| rs4999833 | NP_689844 | E | K | EK | benign            |
| rs4999835 | NP_689844 | R | P | RP | probably damaging |
| rs4999957 | XP_372763 | E | V | EV | benign            |
| rs5000140 | NP_904357 | R | S | RS | possibly damaging |
| rs5000140 | NP_904356 | R | S | RS | possibly damaging |
| rs5000141 | NP_904357 | R | K | RK | benign            |
| rs5000141 | NP_904356 | R | K | RK | benign            |
| rs5001465 | NP_003095 | L | I | LI | benign            |
| rs5001465 | XP_007651 | L | I | LI | benign            |
| rs5002299 | XP_058743 | T | A | TA | benign            |
| rs5002476 | NP_002205 | S | F | SF | possibly damaging |
| rs5003001 | NP_612371 | R | I | RI | possibly damaging |
| rs5003033 | NP_000304 | R | H | RH | benign            |
| rs5003034 | NP_000304 | A | S | AS | benign            |

|           |           |   |   |    |                   |
|-----------|-----------|---|---|----|-------------------|
| rs5003036 | NP_000304 | A | T | AT | benign            |
| rs5003037 | NP_000304 | K | Q | KQ | benign            |
| rs5003726 | NP_075389 | Y | H | YH | possibly damaging |
| rs5003730 | NP_075389 | Y | C | YC | benign            |
| rs5005331 | NP_055382 | A | V | AV | benign            |
| rs5005333 | NP_055382 | R | H | RH | benign            |
| rs5005337 | NP_055382 | D | V | DV | probably damaging |
| rs5005480 | NP_055328 | L | F | LF | benign            |
| rs5005481 | NP_055328 | T | P | TP | benign            |
| rs5005483 | NP_055328 | T | R | TR | benign            |
| rs5005484 | NP_055328 | G | A | GA | benign            |
| rs5005485 | NP_055328 | H | D | HD | possibly damaging |
| rs5005867 | XP_496576 | Q | R | QR | benign            |
| rs5005868 | XP_496576 | I | T | IT | benign            |
| rs5005869 | XP_496576 | N | S | NS | benign            |
| rs5005871 | XP_496576 | N | S | NS | benign            |
| rs5006223 | XP_371306 | W | R | WR | benign            |
| rs5006226 | XP_371306 | I | T | IT | benign            |
| rs5006227 | XP_371306 | T | N | TN | benign            |
| rs5006884 | XP_372353 | L | F | LF | possibly damaging |
| rs5006885 | XP_372353 | S | A | SA | benign            |
| rs5006886 | XP_372353 | R | G | RG | possibly damaging |
| rs5006887 | XP_372353 | T | I | TI | benign            |
| rs5006888 | XP_372353 | S | N | SN | possibly damaging |
| rs5006889 | XP_372353 | T | A | TA | possibly damaging |
| rs5007448 | XP_497650 | P | T | PT | possibly damaging |
| rs5007451 | XP_497650 | N | K | NK | benign            |
| rs5007452 | XP_497650 | L | M | LM | benign            |
| rs5007633 | NP_976028 | E | G | EG | benign            |
| rs5007633 | NP_005340 | E | G | EG | benign            |
| rs5007633 | NP_056958 | E | G | EG | benign            |
| rs5007633 | NP_976029 | E | G | EG | benign            |
| rs5009411 | NP_653327 | V | L | VL | benign            |
| rs5010691 | NP_068590 | G | E | GE | probably damaging |
| rs5010975 | NP_612371 | G | S | GS | benign            |
| rs5011134 | NP_976028 | A | T | AT | benign            |
| rs5011134 | NP_005340 | A | T | AT | benign            |
| rs5011134 | NP_056958 | A | T | AT | benign            |
| rs5011134 | NP_976029 | A | T | AT | benign            |
| rs5011135 | NP_976028 | M | K | MK | probably damaging |
| rs5011135 | NP_005340 | M | K | MK | probably damaging |
| rs5011135 | NP_056958 | M | K | MK | probably damaging |
| rs5011135 | NP_976029 | M | K | MK | probably damaging |
| rs5011295 | NP_056493 | A | P | AP | benign            |
| rs5012649 | XP_377797 | P | S | PS | benign            |
| rs5012651 | XP_377797 | A | S | AS | benign            |

|           |           |   |   |    |                   |
|-----------|-----------|---|---|----|-------------------|
| rs5012990 | NP_079334 | D | Y | DY | possibly damaging |
| rs5013003 | NP_004263 | S | T | ST | benign            |
| rs5013158 | NP_002772 | T | I | TI | benign            |
| rs5014982 | NP_054859 | Y | D | YD | benign            |
| rs5015283 | XP_496399 | G | C | GC | benign            |
| rs5015284 | XP_496399 | L | S | LS | benign            |
| rs5015286 | XP_496399 | P | T | PT | benign            |
| rs5015287 | XP_496399 | E | G | EG | benign            |
| rs5015288 | XP_496399 | G | V | GV | benign            |
| rs5016136 | NP_653327 | M | R | MR | probably damaging |
| rs5017299 | NP_667345 | H | Y | HY | benign            |
| rs5017299 | NP_002495 | H | Y | HY | benign            |
| rs5017299 | NP_667344 | H | Y | HY | benign            |
| rs5017567 | NP_003992 | Q | P | QP | probably damaging |
| rs5017567 | NP_963857 | Q | P | QP | probably damaging |
| rs5017712 | NP_000304 | I | V | IV | benign            |
| rs5017713 | NP_000304 | H | R | HR | possibly damaging |
| rs5017714 | NP_000304 | S | F | SF | possibly damaging |
| rs5017716 | NP_000304 | S | G | SG | benign            |
| rs5017719 | NP_000304 | R | C | RC | probably damaging |
| rs5017899 | XP_027074 | R | K | RK | benign            |
| rs5017900 | XP_027074 | G | R | GR | possibly damaging |
| rs5018018 | NP_002967 | V | E | VE | benign            |
| rs5018120 | NP_775909 | I | V | IV | benign            |
| rs5018225 | XP_048104 | D | V | DV | benign            |
| rs5018687 | NP_612371 | I | T | IT | benign            |
| rs5018688 | NP_612371 | S | N | SN | benign            |
| rs5018754 | XP_378185 | Q | H | QH | benign            |
| rs5018959 | NP_005147 | S | F | SF | possibly damaging |
| rs5019203 | NP_060656 | T | S | TS | benign            |
| rs5019552 | NP_000834 | D | N | DN | benign            |
| rs5019554 | NP_000834 | T | I | TI | benign            |
| rs5019555 | NP_000834 | T | P | TP | benign            |
| rs5020147 | NP_004395 | D | N | DN | possibly damaging |
| rs5020154 | NP_775909 | D | E | DE | benign            |
| rs5020212 | XP_376680 | D | Y | DY | probably damaging |
| rs5020275 | XP_064879 | C | Y | CY | benign            |
| rs5020276 | XP_064879 | C | R | CR | benign            |
| rs5020277 | XP_064879 | M | I | MI | possibly damaging |
| rs5020278 | XP_064879 | T | M | TM | benign            |
| rs5020279 | XP_064879 | H | Q | HQ | possibly damaging |
| rs5020280 | XP_064879 | S | N | SN | benign            |
| rs5020281 | XP_064879 | S | C | SC | benign            |
| rs5020531 | NP_852094 | F | S | FS | benign            |
| rs5021699 | NP_066292 | E | G | EG | probably damaging |
| rs5021809 | NP_064553 | P | R | PR | probably damaging |

|           |           |   |   |    |                   |
|-----------|-----------|---|---|----|-------------------|
| rs5022253 | NP_775909 | K | E | KE | benign            |
| rs5022484 | NP_056289 | S | I | SI | benign            |
| rs5023505 | XP_290704 | V | A | VA | benign            |
| rs5023661 | NP_877577 | L | R | LR | possibly damaging |
| rs5023662 | NP_877577 | A | S | AS | benign            |
| rs5023688 | NP_598000 | V | I | VI | benign            |
| rs5023781 | NP_001257 | L | I | LI | benign            |
| rs5023782 | NP_001257 | C | F | CF | probably damaging |
| rs5024042 | XP_372353 | S | R | SR | possibly damaging |
| rs5024185 | XP_038291 | D | A | DA | probably damaging |
| rs5025132 | XP_496533 | R | H | RH | benign            |
| rs5025404 | NP_114409 | V | L | VL | benign            |
| rs5025571 | XP_496533 | L | P | LP | possibly damaging |
| rs5025589 | NP_829888 | D | N | DN | possibly damaging |
| rs5025830 | NP_061137 | D | H | DH | possibly damaging |
| rs5026210 | XP_496391 | C | S | CS | probably damaging |
| rs5027004 | NP_055568 | M | I | MI | possibly damaging |
| rs5027202 | XP_372763 | R | W | RW | probably damaging |
| rs5027208 | NP_004496 | Q | P | QP | benign            |
| rs5028341 | NP_659460 | L | F | LF | benign            |
| rs5028973 | NP_054770 | G | S | GS | benign            |
| rs5029408 | NP_002974 | S | G | SG | benign            |
| rs5029702 | XP_495808 | G | R | GR | benign            |
| rs5029703 | XP_495808 | G | V | GV | benign            |
| rs5029705 | XP_495808 | N | D | ND | benign            |
| rs5029941 | NP_006281 | A | V | AV | benign            |
| rs5029942 | NP_006281 | F | C | FC | benign            |
| rs5029957 | NP_006281 | A | P | AP | benign            |
| rs5030015 | NP_000884 | G | S | GS | benign            |
| rs5030024 | NP_000884 | L | P | LP | probably damaging |
| rs5030400 | NP_000192 | R | W | RW | possibly damaging |
| rs5030593 | NP_116787 | T | S | TS | benign            |
| rs5030593 | NP_001217 | T | S | TS | benign            |
| rs5030621 | NP_005557 | S | R | SR | probably damaging |
| rs5030622 | NP_937799 | C | W | CW | probably damaging |
| rs5030622 | NP_000542 | C | W | CW | probably damaging |
| rs5030655 | NP_000097 | W | G | WG | possibly damaging |
| rs5030672 | NP_000202 | R | W | RW | probably damaging |
| rs5030674 | NP_116787 | A | T | AT | benign            |
| rs5030674 | NP_001217 | A | T | AT | benign            |
| rs5030683 | NP_116567 | E | A | EA | possibly damaging |
| rs5030683 | NP_002581 | E | A | EA | possibly damaging |
| rs5030685 | NP_116567 | V | A | VA | benign            |
| rs5030685 | NP_002581 | V | A | VA | benign            |
| rs5030687 | NP_620311 | T | I | TI | possibly damaging |
| rs5030687 | NP_055391 | T | I | TI | possibly damaging |



|           |           |   |   |    |                   |
|-----------|-----------|---|---|----|-------------------|
| rs5030687 | NP_620310 | T | I | TI | possibly damaging |
| rs5030713 | NP_612566 | Q | R | QR | possibly damaging |
| rs5030713 | NP_612564 | Q | R | QR | possibly damaging |
| rs5030714 | NP_612566 | C | S | CS | possibly damaging |
| rs5030714 | NP_612567 | C | S | CS | possibly damaging |
| rs5030716 | NP_612566 | F | L | FL | probably damaging |
| rs5030716 | NP_612567 | F | L | FL | probably damaging |
| rs5030718 | NP_612566 | E | K | EK | benign            |
| rs5030718 | NP_612567 | E | K | EK | benign            |
| rs5030719 | NP_612566 | Q | H | QH | possibly damaging |
| rs5030719 | NP_612567 | Q | H | QH | possibly damaging |
| rs5030722 | NP_612566 | K | R | KR | benign            |
| rs5030722 | NP_612567 | K | R | KR | benign            |
| rs5030723 | NP_612566 | R | H | RH | benign            |
| rs5030723 | NP_612567 | R | H | RH | benign            |
| rs5030724 | NP_612566 | Q | K | QK | possibly damaging |
| rs5030724 | NP_612567 | Q | K | QK | possibly damaging |
| rs5030732 | NP_004172 | S | Y | SY | possibly damaging |
| rs5030737 | NP_000233 | R | C | RC | probably damaging |
| rs5030738 | NP_000560 | A | D | AD | benign            |
| rs5030739 | NP_060597 | A | T | AT | benign            |
| rs5030742 | NP_002937 | L | V | LV | benign            |
| rs5030750 | NP_002937 | I | N | IN | probably damaging |
| rs5030751 | NP_004437 | P | H | PH | probably damaging |
| rs5030752 | NP_004437 | I | V | IV | benign            |
| rs5030753 | NP_004437 | H | Y | HY | possibly damaging |
| rs5030755 | NP_002936 | T | A | TA | benign            |
| rs5030764 | NP_000165 | N | S | NS | benign            |
| rs5030773 | NP_000885 | Q | R | QR | possibly damaging |
| rs5030774 | NP_000885 | G | S | GS | benign            |
| rs5030776 | NP_000501 | C | G | CG | probably damaging |
| rs5030777 | NP_000501 | C | R | CR | probably damaging |
| rs5030796 | NP_006286 | G | A | GA | benign            |
| rs5030798 | NP_006286 | V | I | VI | benign            |
| rs5030803 | NP_937799 | V | G | VG | possibly damaging |
| rs5030803 | NP_000542 | V | G | VG | probably damaging |
| rs5030804 | NP_937799 | N | S | NS | benign            |
| rs5030804 | NP_000542 | N | S | NS | probably damaging |
| rs5030805 | NP_937799 | S | I | SI | benign            |
| rs5030805 | NP_000542 | S | I | SI | probably damaging |
| rs5030806 | NP_937799 | P | S | PS | possibly damaging |
| rs5030806 | NP_000542 | P | S | PS | probably damaging |
| rs5030807 | NP_937799 | L | P | LP | possibly damaging |
| rs5030807 | NP_000542 | L | P | LP | probably damaging |
| rs5030808 | NP_937799 | G | R | GR | possibly damaging |
| rs5030808 | NP_000542 | G | R | GR | probably damaging |

|           |           |   |   |    |                   |
|-----------|-----------|---|---|----|-------------------|
| rs5030809 | NP_937799 | Y | H | YH | benign            |
| rs5030809 | NP_000542 | Y | H | YH | possibly damaging |
| rs5030811 | NP_000542 | H | Y | HY | benign            |
| rs5030812 | NP_000542 | H | R | HR | probably damaging |
| rs5030818 | NP_937799 | R | G | RG | possibly damaging |
| rs5030818 | NP_000542 | R | G | RG | probably damaging |
| rs5030820 | NP_937799 | R | W | RW | possibly damaging |
| rs5030821 | NP_937799 | R | Q | RQ | benign            |
| rs5030821 | NP_000542 | R | Q | RQ | benign            |
| rs5030822 | NP_937799 | L | Q | LQ | benign            |
| rs5030822 | NP_000542 | L | Q | LQ | probably damaging |
| rs5030824 | NP_937799 | L | V | LV | benign            |
| rs5030824 | NP_000542 | L | V | LV | benign            |
| rs5030827 | NP_937799 | V | L | VL | benign            |
| rs5030827 | NP_000542 | V | L | VL | benign            |
| rs5030828 | NP_937799 | L | P | LP | possibly damaging |
| rs5030828 | NP_000542 | L | P | LP | possibly damaging |
| rs5030830 | NP_000542 | L | P | LP | probably damaging |
| rs5030832 | NP_000542 | D | G | DG | possibly damaging |
| rs5030833 | NP_000542 | F | C | FC | probably damaging |
| rs5030841 | NP_000268 | L | S | LS | probably damaging |
| rs5030842 | NP_000268 | S | P | SP | probably damaging |
| rs5030843 | NP_000268 | R | Q | RQ | probably damaging |
| rs5030844 | NP_000268 | L | P | LP | probably damaging |
| rs5030845 | NP_000268 | S | P | SP | probably damaging |
| rs5030847 | NP_000268 | R | W | RW | probably damaging |
| rs5030848 | NP_000268 | G | C | GC | probably damaging |
| rs5030849 | NP_000268 | R | Q | RQ | probably damaging |
| rs5030851 | NP_000268 | P | L | PL | probably damaging |
| rs5030853 | NP_000268 | A | S | AS | benign            |
| rs5030856 | NP_000268 | E | G | EG | possibly damaging |
| rs5030857 | NP_000268 | A | V | AV | possibly damaging |
| rs5030858 | NP_000268 | R | W | RW | probably damaging |
| rs5030859 | NP_000268 | R | Q | RQ | probably damaging |
| rs5030860 | NP_000268 | Y | C | YC | probably damaging |
| rs5030862 | NP_000097 | G | R | GR | possibly damaging |
| rs5030866 | NP_000097 | G | E | GE | benign            |
| rs5030867 | NP_000097 | H | P | HP | probably damaging |
| rs5030868 | NP_000393 | S | F | SF | benign            |
| rs5030869 | NP_000393 | A | T | AT | benign            |
| rs5030870 | NP_000393 | D | N | DN | benign            |
| rs5030872 | NP_000393 | D | V | DV | possibly damaging |
| rs5030878 | NP_002020 | I | T | IT | benign            |
| rs5030880 | NP_002020 | R | W | RW | probably damaging |
| rs5030920 | NP_001048 | I | T | IT | benign            |
| rs5030965 | NP_005856 | S | I | SI | benign            |

|           |           |   |   |    |                   |
|-----------|-----------|---|---|----|-------------------|
| rs5030980 | NP_015531 | A | T | AT | benign            |
| rs5031003 | NP_612149 | A | T | AT | benign            |
| rs5031003 | NP_000042 | A | T | AT | benign            |
| rs5031003 | NP_612150 | A | T | AT | benign            |
| rs5031015 | NP_009294 | A | T | AT | benign            |
| rs5031016 | NP_000753 | I | T | IT | probably damaging |
| rs5031016 | NP_085079 | I | T | IT | probably damaging |
| rs5031016 | NP_000755 | I | T | IT | probably damaging |
| rs5031017 | NP_000753 | G | V | GV | benign            |
| rs5031039 | NP_006155 | S | P | SP | benign            |
| rs5031050 | NP_612566 | F | Y | FY | benign            |
| rs5031050 | NP_612567 | F | Y | FY | benign            |
| rs5741804 | NP_001716 | A | V | AV | benign            |
| rs5741809 | NP_001716 | N | D | ND | benign            |
| rs5742346 | NP_786885 | M | T | MT | probably damaging |
| rs5742347 | NP_786885 | M | I | MI | benign            |
| rs5742796 | NP_001335 | A | T | AT | benign            |
| rs5742904 | NP_000375 | R | Q | RQ | benign            |
| rs5742906 | NP_847899 | P | L | PL | possibly damaging |
| rs5742912 | NP_001029 | W | R | WR | probably damaging |
| rs5742913 | NP_963965 | P | S | PS | benign            |
| rs5742913 | NP_963964 | P | S | PS | benign            |
| rs5742913 | NP_998813 | P | S | PS | benign            |
| rs5742973 | NP_000525 | E | Q | EQ | benign            |
| rs5743240 | NP_006586 | M | V | MV | possibly damaging |
| rs5743271 | NP_071445 | N | S | NS | benign            |
| rs5743272 | NP_071445 | H | R | HR | probably damaging |
| rs5743275 | NP_071445 | P | L | PL | probably damaging |
| rs5743276 | NP_071445 | R | W | RW | benign            |
| rs5743277 | NP_071445 | R | C | RC | probably damaging |
| rs5743278 | NP_071445 | A | G | AG | benign            |
| rs5743279 | NP_071445 | R | Q | RQ | benign            |
| rs5743291 | NP_071445 | V | I | VI | benign            |
| rs5743295 | NP_071445 | R | L | RL | probably damaging |
| rs5743316 | NP_003256 | N | I | NI | probably damaging |
| rs5743317 | NP_003256 | Y | D | YD | benign            |
| rs5743318 | NP_003256 | S | T | ST | benign            |
| rs5743342 | NP_006083 | D | N | DN | benign            |
| rs5743344 | NP_006083 | A | V | AV | benign            |
| rs5743345 | NP_006083 | R | W | RW | possibly damaging |
| rs5743346 | NP_006083 | A | T | AT | benign            |
| rs5743347 | NP_006083 | R | H | RH | benign            |
| rs5743497 | NP_001716 | A | T | AT | benign            |
| rs5743498 | NP_001716 | A | V | AV | benign            |
| rs5743500 | NP_001716 | R | C | RC | probably damaging |
| rs5743506 | NP_001716 | E | Q | EQ | benign            |

|           |           |   |   |    |                   |
|-----------|-----------|---|---|----|-------------------|
| rs5743509 | NP_001716 | A | V | AV | benign            |
| rs5743513 | NP_001716 | K | Q | KQ | benign            |
| rs5743523 | NP_001716 | P | S | PS | possibly damaging |
| rs5743524 | NP_001716 | V | I | VI | benign            |
| rs5743542 | NP_001716 | K | E | KE | probably damaging |
| rs5743549 | NP_001716 | D | H | DH | possibly damaging |
| rs5743611 | NP_003254 | R | T | RT | probably damaging |
| rs5743612 | NP_003254 | H | Y | HY | probably damaging |
| rs5743613 | NP_003254 | P | L | PL | possibly damaging |
| rs5743617 | NP_006059 | G | V | GV | benign            |
| rs5743617 | NP_003254 | V | G | VG | benign            |
| rs5743618 | NP_003254 | S | I | SI | possibly damaging |
| rs5743619 | NP_003254 | L | R | LR | possibly damaging |
| rs5743621 | NP_003254 | P | L | PL | probably damaging |
| rs5743649 | NP_004262 | S | P | SP | possibly damaging |
| rs5743651 | NP_004262 | Y | C | YC | probably damaging |
| rs5743672 | NP_766630 | R | H | RH | possibly damaging |
| rs5743672 | NP_005690 | R | H | RH | possibly damaging |
| rs5743672 | NP_766632 | R | H | RH | possibly damaging |
| rs5743673 | NP_766630 | R | Q | RQ | benign            |
| rs5743673 | NP_005690 | R | Q | RQ | benign            |
| rs5743673 | NP_766632 | R | Q | RQ | benign            |
| rs5743685 | NP_006176 | A | T | AT | benign            |
| rs5743699 | NP_003255 | T | I | TI | possibly damaging |
| rs5743702 | NP_003255 | I | T | IT | benign            |
| rs5743703 | NP_003255 | R | H | RH | benign            |
| rs5743704 | NP_003255 | P | H | PH | probably damaging |
| rs5743706 | NP_003255 | Y | N | YN | probably damaging |
| rs5743708 | NP_003255 | R | Q | RQ | possibly damaging |
| rs5743781 | NP_057646 | A | V | AV | benign            |
| rs5743808 | NP_006059 | I | T | IT | benign            |
| rs5743809 | NP_006059 | L | P | LP | benign            |
| rs5743810 | NP_006059 | S | P | SP | possibly damaging |
| rs5743811 | NP_006059 | T | I | TI | possibly damaging |
| rs5743813 | NP_006059 | H | Y | HY | probably damaging |
| rs5743815 | NP_006059 | V | A | VA | benign            |
| rs5743816 | NP_006059 | V | I | VI | benign            |
| rs5743817 | NP_006059 | A | T | AT | benign            |
| rs5743819 | NP_006059 | N | D | ND | possibly damaging |
| rs5743820 | NP_006059 | T | M | TM | benign            |
| rs5743822 | NP_006059 | M | V | MV | benign            |
| rs5743842 | NP_059138 | R | C | RC | possibly damaging |
| rs5743843 | NP_059138 | H | Q | HQ | probably damaging |
| rs5743844 | NP_059138 | P | L | PL | probably damaging |
| rs5743845 | NP_059138 | R | Q | RQ | benign            |
| rs5743846 | NP_059138 | A | T | AT | benign            |

|           |           |   |   |    |                   |
|-----------|-----------|---|---|----|-------------------|
| rs5744015 | NP_061882 | A | S | AS | benign            |
| rs5744077 | NP_057694 | M | V | MV | benign            |
| rs5744077 | NP_619542 | M | V | MV | benign            |
| rs5744082 | NP_057694 | R | Q | RQ | benign            |
| rs5744082 | NP_619542 | R | Q | RQ | benign            |
| rs5744166 | NP_003259 | P | A | PA | possibly damaging |
| rs5744167 | NP_003259 | N | T | NT | benign            |
| rs5744171 | NP_003259 | L | I | LI | benign            |
| rs5744173 | NP_003259 | N | T | NT | benign            |
| rs5744174 | NP_003259 | F | L | FL | benign            |
| rs5744175 | NP_003259 | I | F | IF | benign            |
| rs5744176 | NP_003259 | D | G | DG | possibly damaging |
| rs5744177 | NP_003259 | D | G | DG | benign            |
| rs5744204 | NP_004130 | V | M | VM | benign            |
| rs5744212 | NP_004130 | L | F | LF | benign            |
| rs5744213 | NP_004130 | R | W | RW | probably damaging |
| rs5744220 | NP_004130 | Y | C | YC | probably damaging |
| rs5744409 | NP_001276 | Y | H | YH | possibly damaging |
| rs5744463 | NP_005573 | V | L | VL | benign            |
| rs5744525 | NP_005573 | D | N | DN | benign            |
| rs5744713 | NP_057302 | T | I | TI | benign            |
| rs5744716 | NP_057302 | S | N | SN | benign            |
| rs5744739 | NP_006222 | P | L | PL | benign            |
| rs5744751 | NP_006222 | A | V | AV | benign            |
| rs5744752 | NP_006222 | R | Q | RQ | benign            |
| rs5744760 | NP_006222 | N | S | NS | benign            |
| rs5744799 | NP_006222 | F | I | FI | possibly damaging |
| rs5744800 | NP_006222 | P | S | PS | probably damaging |
| rs5744904 | NP_006222 | R | C | RC | probably damaging |
| rs5744933 | NP_006222 | Y | C | YC | probably damaging |
| rs5744934 | NP_006222 | N | S | NS | possibly damaging |
| rs5744935 | NP_006222 | E | Q | EQ | benign            |
| rs5744947 | NP_006222 | K | R | KR | benign            |
| rs5744948 | NP_006222 | E | A | EA | benign            |
| rs5744950 | NP_006222 | A | V | AV | benign            |
| rs5744971 | NP_006222 | K | R | KR | benign            |
| rs5744991 | NP_006222 | C | Y | CY | benign            |
| rs5745021 | NP_006222 | A | V | AV | benign            |
| rs5745066 | NP_006222 | E | K | EK | benign            |
| rs5745067 | NP_006222 | R | C | RC | possibly damaging |
| rs5745068 | NP_006222 | R | H | RH | benign            |
| rs5745100 | NP_001196 | Q | H | QH | possibly damaging |
| rs5745100 | NP_053581 | Q | H | QH | possibly damaging |
| rs5745100 | NP_053583 | Q | H | QH | possibly damaging |
| rs5745100 | NP_053582 | Q | H | QH | possibly damaging |
| rs5745311 | NP_002431 | A | V | AV | benign            |

|           |           |   |   |    |                   |
|-----------|-----------|---|---|----|-------------------|
| rs5745324 | NP_002431 | A | T | AT | benign            |
| rs5745325 | NP_002431 | A | T | AT | benign            |
| rs5745329 | NP_002431 | E | K | EK | benign            |
| rs5745459 | NP_002431 | Y | C | YC | probably damaging |
| rs5745549 | NP_002431 | S | N | SN | benign            |
| rs5745592 | NP_001179 | S | R | SR | possibly damaging |
| rs5745687 | NP_000592 | E | K | EK | benign            |
| rs5745688 | NP_000592 | D | Y | DY | probably damaging |
| rs5745796 | NP_031396 | A | T | AT | benign            |
| rs5745905 | NP_078884 | S | C | SC | benign            |
| rs5745906 | NP_078884 | G | D | GD | possibly damaging |
| rs5745907 | NP_078884 | C | R | CR | probably damaging |
| rs5745926 | NP_078884 | D | N | DN | benign            |
| rs5745934 | NP_006706 | R | K | RK | benign            |
| rs5746025 | NP_001057 | V | M | VM | benign            |
| rs5746026 | NP_001057 | E | K | EK | benign            |
| rs5746027 | NP_001057 | A | T | AT | benign            |
| rs5746031 | NP_001057 | L | P | LP | possibly damaging |
| rs5746032 | NP_001057 | Q | R | QR | benign            |
| rs5746096 | NP_000627 | S | I | SI | possibly damaging |
| rs5746097 | NP_000627 | E | V | EV | benign            |
| rs5746129 | NP_000627 | R | W | RW | benign            |
| rs5746220 | NP_002871 | P | L | PL | probably damaging |
| rs5746260 | NP_054879 | R | Q | RQ | possibly damaging |
| rs5746841 | NP_665691 | Q | H | QH | possibly damaging |
| rs5746841 | NP_006431 | Q | H | QH | possibly damaging |
| rs5746841 | NP_665690 | Q | H | QH | probably damaging |
| rs5746863 | NP_002873 | A | V | AV | benign            |
| rs5747933 | NP_057419 | T | N | TN | benign            |
| rs5747972 | NP_005128 | V | G | VG | possibly damaging |
| rs5748449 | NP_443730 | R | H | RH | benign            |
| rs5748469 | NP_665691 | A | S | AS | benign            |
| rs5748469 | NP_006431 | A | S | AS | benign            |
| rs5748493 | NP_001661 | G | R | GR | possibly damaging |
| rs5748529 | NP_073557 | A | V | AV | benign            |
| rs5748539 | NP_037505 | A | T | AT | benign            |
| rs5749088 | XP_117224 | A | T | AT | benign            |
| rs5749118 | XP_496524 | R | K | RK | benign            |
| rs5749408 | NP_006595 | Y | C | YC | benign            |
| rs5749645 | NP_680481 | L | V | LV | benign            |
| rs5749645 | NP_680480 | L | V | LV | benign            |
| rs5750925 | XP_039385 | Q | H | QH | benign            |
| rs5751066 | NP_113676 | S | F | SF | benign            |
| rs5751819 | NP_004112 | E | K | EK | benign            |
| rs5751823 | XP_496518 | H | R | HR | benign            |
| rs5752195 | NP_004773 | T | I | TI | benign            |

|           |           |   |   |    |                   |
|-----------|-----------|---|---|----|-------------------|
| rs5752330 | NP_690054 | V | M | VM | benign            |
| rs5752330 | NP_071364 | V | M | VM | benign            |
| rs5753190 | XP_496524 | Q | R | QR | possibly damaging |
| rs5753567 | NP_114439 | A | T | AT | benign            |
| rs5753567 | NP_114440 | A | T | AT | benign            |
| rs5753567 | NP_114441 | A | T | AT | benign            |
| rs5753567 | NP_055138 | A | T | AT | benign            |
| rs5753700 | XP_038520 | Y | H | YH | possibly damaging |
| rs5754014 | NP_006595 | P | S | PS | probably damaging |
| rs5755713 | NP_002124 | Q | H | QH | possibly damaging |
| rs5756514 | NP_694564 | S | F | SF | possibly damaging |
| rs5756514 | NP_705837 | S | F | SF | possibly damaging |
| rs5756870 | NP_008872 | D | N | DN | possibly damaging |
| rs5756896 | NP_036539 | Q | H | QH | benign            |
| rs5757262 | NP_004277 | Q | H | QH | possibly damaging |
| rs5757921 | NP_000017 | S | N | SN | possibly damaging |
| rs5758075 | NP_006349 | L | M | LM | benign            |
| rs5758252 | NP_001420 | T | S | TS | benign            |
| rs5758380 | NP_001089 | L | I | LI | benign            |
| rs5758399 | NP_001460 | I | F | IF | benign            |
| rs5758651 | NP_852469 | S | G | SG | benign            |
| rs5758651 | NP_005641 | S | G | SG | benign            |
| rs5758702 | NP_006106 | L | V | LV | benign            |
| rs5758778 | NP_056518 | V | L | VL | benign            |
| rs5758801 | NP_055324 | V | D | VD | possibly damaging |
| rs5758801 | NP_733795 | V | D | VD | possibly damaging |
| rs5759612 | NP_004905 | N | D | ND | benign            |
| rs5760010 | NP_005931 | Q | H | QH | benign            |
| rs5760185 | NP_036427 | A | T | AT | benign            |
| rs5760243 | NP_062547 | L | M | LM | benign            |
| rs5760274 | NP_004112 | L | I | LI | benign            |
| rs5760289 | XP_371424 | R | G | RG | probably damaging |
| rs5760340 | XP_037759 | S | F | SF | possibly damaging |
| rs5760619 | XP_496521 | L | V | LV | benign            |
| rs5761170 | NP_115997 | W | R | WR | possibly damaging |
| rs5761360 | NP_115997 | S | I | SI | benign            |
| rs5761634 | NP_001878 | G | R | GR | possibly damaging |
| rs5761750 | NP_006758 | E | Q | EQ | benign            |
| rs5762046 | XP_496501 | D | V | DV | benign            |
| rs5762809 | NP_005071 | A | T | AT | benign            |
| rs5763120 | NP_036397 | S | R | SR | benign            |
| rs5763933 | NP_114143 | R | S | RS | possibly damaging |
| rs5764214 | NP_073622 | T | A | TA | benign            |
| rs5764214 | NP_942153 | T | A | TA | benign            |
| rs5764698 | NP_683515 | L | M | LM | benign            |
| rs5766190 | NP_612424 | S | N | SN | benign            |

|           |           |   |   |    |                   |
|-----------|-----------|---|---|----|-------------------|
| rs5766863 | NP_006062 | S | N | SN | benign            |
| rs5768535 | NP_057510 | L | V | LV | benign            |
| rs5769060 | XP_027105 | T | I | TI | possibly damaging |
| rs5770848 | NP_149977 | R | S | RS | benign            |
| rs5770886 | NP_612442 | Q | R | QR | benign            |
| rs5771002 | NP_001088 | M | V | MV | benign            |
| rs5771107 | NP_065194 | S | C | SC | benign            |
| rs5771231 | NP_113642 | A | S | AS | benign            |
| rs5771604 | XP_496486 | S | Y | SY | benign            |
| rs5904570 | NP_055742 | S | R | SR | possibly damaging |
| rs5904861 | XP_497170 | D | Y | DY | probably damaging |
| rs5905720 | NP_079135 | L | V | LV | benign            |
| rs5905881 | XP_372204 | L | W | LW | probably damaging |
| rs5906354 | NP_695012 | R | H | RH | benign            |
| rs5906358 | NP_148978 | P | L | PL | probably damaging |
| rs5906526 | XP_092995 | T | S | TS | benign            |
| rs5906744 | NP_079135 | R | H | RH | benign            |
| rs5906755 | NP_005174 | R | L | RL | probably damaging |
| rs5909299 | XP_372199 | A | T | AT | benign            |
| rs5910348 | NP_061918 | S | R | SR | possibly damaging |
| rs5911741 | NP_006594 | R | K | RK | benign            |
| rs5911751 | NP_006594 | P | L | PL | probably damaging |
| rs5913638 | NP_000282 | E | D | ED | possibly damaging |
| rs5915289 | XP_050478 | S | N | SN | benign            |
| rs5916769 | NP_942582 | H | Q | HQ | possibly damaging |
| rs5916769 | NP_060222 | H | Q | HQ | probably damaging |
| rs5917414 | NP_004643 | M | T | MT | benign            |
| rs5917414 | NP_068706 | M | T | MT | benign            |
| rs5918228 | NP_005291 | E | Q | EQ | benign            |
| rs5918811 | NP_002538 | G | R | GR | possibly damaging |
| rs5921979 | NP_000298 | A | G | AG | possibly damaging |
| rs5924658 | NP_775764 | Q | E | QE | benign            |
| rs5926895 | XP_293354 | T | A | TA | benign            |
| rs5926910 | XP_498353 | I | V | IV | benign            |
| rs5927629 | NP_690000 | R | W | RW | possibly damaging |
| rs5927629 | NP_938054 | R | W | RW | probably damaging |
| rs5928433 | XP_066695 | P | R | PR | benign            |
| rs5929931 | XP_498392 | W | L | WL | probably damaging |
| rs5930670 | NP_003919 | S | W | SW | benign            |
| rs5930781 | XP_498390 | P | S | PS | possibly damaging |
| rs5931046 | NP_473362 | L | P | LP | benign            |
| rs5934750 | NP_056506 | A | T | AT | benign            |
| rs5937160 | NP_071763 | S | N | SN | benign            |
| rs5937160 | NP_660095 | S | N | SN | benign            |
| rs5937177 | XP_498452 | R | Q | RQ | benign            |
| rs5940668 | NP_001280 | R | C | RC | benign            |



|           |           |   |   |    |                   |
|-----------|-----------|---|---|----|-------------------|
| rs5943854 | XP_373340 | N | S | NS | benign            |
| rs5944317 | NP_775970 | S | P | SP | benign            |
| rs5944420 | XP_093087 | A | T | AT | benign            |
| rs5944856 | NP_525129 | G | A | GA | benign            |
| rs5944882 | XP_040486 | Q | R | QR | benign            |
| rs5945029 | NP_525129 | A | V | AV | benign            |
| rs5945234 | NP_001354 | S | N | SN | benign            |
| rs5945418 | NP_001447 | T | P | TP | benign            |
| rs5945430 | NP_059984 | E | D | ED | benign            |
| rs5948798 | NP_037371 | A | T | AT | benign            |
| rs5950504 | XP_498383 | V | A | VA | benign            |
| rs5950505 | XP_498383 | I | T | IT | probably damaging |
| rs5951426 | NP_689790 | D | E | DE | benign            |
| rs5951639 | NP_056968 | R | P | RP | probably damaging |
| rs5952410 | NP_000257 | D | E | DE | benign            |
| rs5952474 | NP_775493 | R | C | RC | probably damaging |
| rs5952606 | XP_498361 | R | K | RK | benign            |
| rs5953089 | XP_373344 | R | G | RG | possibly damaging |
| rs5953281 | XP_372210 | R | H | RH | benign            |
| rs5953618 | NP_115793 | V | L | VL | benign            |
| rs5953851 | XP_066457 | V | I | VI | benign            |
| rs5956583 | NP_001158 | Q | P | QP | possibly damaging |
| rs5958251 | XP_373368 | V | A | VA | benign            |
| rs5959129 | XP_497185 | R | Q | RQ | probably damaging |
| rs5959130 | NP_000043 | V | L | VL | benign            |
| rs5962707 | NP_060485 | M | I | MI | benign            |
| rs5962813 | NP_005368 | H | Q | HQ | benign            |
| rs5963403 | NP_000319 | Q | H | QH | benign            |
| rs5963719 | NP_940913 | F | S | FS | possibly damaging |
| rs5963721 | NP_940913 | A | V | AV | benign            |
| rs5964967 | XP_374328 | A | P | AP | benign            |
| rs5964968 | XP_374328 | P | L | PL | probably damaging |
| rs5968704 | NP_000381 | T | S | TS | possibly damaging |
| rs5969783 | NP_060830 | I | V | IV | benign            |
| rs5970376 | NP_786885 | V | D | VD | benign            |
| rs5971193 | NP_997202 | E | D | ED | benign            |
| rs5972599 | NP_000100 | A | V | AV | benign            |
| rs5972599 | NP_003997 | A | V | AV | benign            |
| rs5972599 | NP_003998 | A | V | AV | benign            |
| rs5972599 | NP_004000 | A | V | AV | benign            |
| rs5972599 | NP_004001 | A | V | AV | benign            |
| rs5974620 | NP_004831 | Q | H | QH | possibly damaging |
| rs5975187 | NP_848566 | S | L | SL | benign            |
| rs5976127 | XP_498392 | D | N | DN | benign            |
| rs5977625 | NP_919253 | S | L | SL | benign            |
| rs5982146 | NP_065983 | A | T | AT | benign            |

|           |           |   |   |    |                   |
|-----------|-----------|---|---|----|-------------------|
| rs5983119 | NP_056234 | V | I | VI | benign            |
| rs5983120 | NP_056234 | V | L | VL | benign            |
| rs5985391 | XP_497141 | R | C | RC | possibly damaging |
| rs5986182 | NP_775494 | D | N | DN | benign            |
| rs5986591 | NP_005382 | R | K | RK | benign            |
| rs5987003 | NP_066274 | P | A | PA | possibly damaging |
| rs5987076 | NP_000123 | T | P | TP | benign            |
| rs5987155 | NP_005384 | M | T | MT | benign            |
| rs5987182 | NP_001657 | A | V | AV | benign            |
| rs5987256 | NP_006721 | D | A | DA | possibly damaging |
| rs5988564 | XP_498350 | K | N | KN | benign            |
| rs5988564 | XP_498407 | K | N | KN | benign            |
| rs5989643 | NP_037371 | Q | H | QH | possibly damaging |
| rs5989643 | NP_955358 | Q | H | QH | possibly damaging |
| rs5992128 | XP_032997 | M | L | ML | benign            |
| rs5992495 | NP_665690 | S | R | SR | benign            |
| rs5992495 | NP_665691 | S | R | SR | benign            |
| rs5992495 | NP_006431 | S | R | SR | benign            |
| rs5994570 | NP_777592 | V | L | VL | benign            |
| rs5995361 | NP_000622 | A | E | AE | benign            |
| rs5995378 | NP_694564 | S | L | SL | possibly damaging |
| rs5995378 | NP_705837 | S | L | SL | possibly damaging |
| rs5995649 | NP_004891 | T | K | TK | benign            |
| rs5995720 | NP_009059 | E | K | EK | benign            |
| rs5995741 | NP_002400 | A | D | AD | possibly damaging |
| rs5995794 | NP_612444 | R | G | RG | possibly damaging |
| rs5996694 | XP_037759 | A | V | AV | benign            |
| rs5997872 | NP_008863 | A | V | AV | benign            |
| rs5997872 | NP_599031 | A | V | AV | benign            |
| rs5997872 | NP_599032 | A | V | AV | benign            |
| rs5997875 | NP_599031 | K | N | KN | benign            |
| rs5997883 | XP_496526 | Q | H | QH | benign            |
| rs5997917 | NP_005560 | G | S | GS | benign            |
| rs5998267 | XP_086894 | L | P | LP | possibly damaging |
| rs5998478 | NP_777592 | S | P | SP | possibly damaging |
| rs5998495 | NP_777592 | S | R | SR | benign            |
| rs5999923 | NP_085144 | N | K | NK | benign            |
| rs6000152 | NP_085147 | A | V | AV | benign            |
| rs6000152 | NP_663614 | A | V | AV | benign            |
| rs6000152 | NP_663615 | A | V | AV | benign            |
| rs6000152 | NP_055164 | A | V | AV | benign            |
| rs6000546 | NP_078957 | E | K | EK | benign            |
| rs6000577 | NP_000869 | S | Y | SY | benign            |
| rs6000698 | XP_056282 | S | Y | SY | possibly damaging |
| rs6000998 | NP_563581 | L | F | LF | possibly damaging |
| rs6001000 | NP_563581 | S | G | SG | possibly damaging |

|           |           |   |   |    |                   |
|-----------|-----------|---|---|----|-------------------|
| rs6001200 | NP_055691 | S | R | SR | benign            |
| rs6001210 | NP_004277 | K | N | KN | possibly damaging |
| rs6001357 | NP_004891 | E | D | ED | benign            |
| rs6001854 | XP_039385 | Q | H | QH | benign            |
| rs6002520 | NP_004590 | A | T | AT | benign            |
| rs6002656 | NP_852469 | T | N | TN | benign            |
| rs6002656 | NP_005641 | T | N | TN | benign            |
| rs6003030 | NP_036395 | S | L | SL | benign            |
| rs6003139 | NP_954578 | R | Q | RQ | benign            |
| rs6003139 | NP_543029 | R | Q | RQ | possibly damaging |
| rs6003982 | XP_208261 | S | C | SC | benign            |
| rs6004105 | NP_004112 | Q | H | QH | benign            |
| rs6004132 | XP_037759 | T | A | TA | benign            |
| rs6004318 | XP_059318 | L | V | LV | benign            |
| rs6004350 | XP_059318 | T | P | TP | benign            |
| rs6004901 | NP_115997 | G | A | GA | benign            |
| rs6004989 | NP_066938 | P | L | PL | benign            |
| rs6005062 | NP_036275 | N | S | NS | benign            |
| rs6005371 | XP_375963 | A | T | AT | benign            |
| rs6005716 | XP_496502 | M | V | MV | benign            |
| rs6006259 | NP_115580 | R | L | RL | probably damaging |
| rs6006436 | NP_073622 | E | K | EK | benign            |
| rs6006436 | NP_942153 | E | K | EK | benign            |
| rs6006438 | NP_073622 | S | A | SA | benign            |
| rs6006438 | NP_942153 | S | A | SA | benign            |
| rs6006514 | NP_942153 | R | W | RW | possibly damaging |
| rs6006514 | NP_073622 | R | W | RW | probably damaging |
| rs6006979 | NP_008884 | Q | L | QL | probably damaging |
| rs6007304 | NP_851851 | R | W | RW | probably damaging |
| rs6007344 | NP_851851 | G | R | GR | benign            |
| rs6007594 | NP_060381 | H | R | HR | benign            |
| rs6007897 | NP_055061 | T | A | TA | benign            |
| rs6008057 | NP_055161 | K | N | KN | benign            |
| rs6008384 | NP_006062 | N | S | NS | benign            |
| rs6008394 | NP_006062 | R | Q | RQ | benign            |
| rs6008600 | NP_057510 | T | A | TA | benign            |
| rs6008622 | NP_057510 | S | N | SN | benign            |
| rs6008684 | NP_057510 | D | E | DE | benign            |
| rs6008777 | NP_055061 | S | L | SL | possibly damaging |
| rs6008794 | NP_055061 | L | P | LP | probably damaging |
| rs6008795 | NP_055061 | L | P | LP | probably damaging |
| rs6008842 | NP_055061 | V | I | VI | benign            |
| rs6009915 | XP_376023 | S | I | SI | possibly damaging |
| rs6009968 | NP_002963 | R | K | RK | benign            |
| rs6010066 | NP_002963 | L | V | LV | benign            |
| rs6010154 | NP_079480 | P | L | PL | possibly damaging |

|           |           |   |   |    |                   |
|-----------|-----------|---|---|----|-------------------|
| rs6010209 | NP_065194 | D | E | DE | benign            |
| rs6010260 | NP_055981 | C | F | CF | probably damaging |
| rs6010260 | NP_631941 | C | F | CF | probably damaging |
| rs6010318 | XP_496486 | R | C | RC | benign            |
| rs6010456 | XP_496486 | R | H | RH | benign            |
| rs6010714 | NP_942016 | V | I | VI | benign            |
| rs6010736 | NP_004526 | P | L | PL | probably damaging |
| rs6011194 | NP_542189 | P | L | PL | benign            |
| rs6011414 | NP_001844 | G | S | GS | possibly damaging |
| rs6011439 | NP_689515 | P | L | PL | benign            |
| rs6011440 | NP_689515 | P | L | PL | benign            |
| rs6011693 | NP_071444 | A | G | AG | benign            |
| rs6011693 | NP_647478 | A | G | AG | benign            |
| rs6011889 | NP_543013 | A | V | AV | benign            |
| rs6011974 | NP_955473 | R | K | RK | benign            |
| rs6012504 | NP_065871 | A | T | AT | benign            |
| rs6012764 | NP_056081 | L | F | LF | benign            |
| rs6015225 | NP_542405 | F | Y | FY | benign            |
| rs6015609 | NP_817089 | I | T | IT | benign            |
| rs6017104 | NP_056293 | I | M | IM | benign            |
| rs6017146 | NP_002457 | N | S | NS | benign            |
| rs6017577 | NP_542771 | T | I | TI | benign            |
| rs6017577 | NP_542772 | T | I | TI | possibly damaging |
| rs6017577 | NP_542774 | T | I | TI | possibly damaging |
| rs6017667 | XP_372869 | G | S | GS | benign            |
| rs6017704 | NP_542790 | L | F | LF | benign            |
| rs6017725 | NP_004985 | P | L | PL | probably damaging |
| rs6018008 | NP_110404 | T | A | TA | benign            |
| rs6018260 | NP_938033 | L | F | LF | benign            |
| rs6018612 | NP_006525 | P | L | PL | probably damaging |
| rs6018612 | NP_858045 | P | L | PL | probably damaging |
| rs6018831 | XP_378982 | A | E | AE | benign            |
| rs6019092 | XP_378983 | S | P | SP | possibly damaging |
| rs6019331 | NP_065871 | R | C | RC | probably damaging |
| rs6019652 | NP_055717 | A | T | AT | benign            |
| rs6020123 | NP_006029 | P | L | PL | probably damaging |
| rs6020624 | NP_543019 | P | L | PL | benign            |
| rs6021695 | NP_955459 | S | I | SI | possibly damaging |
| rs6021773 | NP_060667 | P | L | PL | benign            |
| rs6021773 | NP_955458 | P | L | PL | benign            |
| rs6021773 | NP_955459 | P | L | PL | probably damaging |
| rs6022363 | NP_055472 | L | F | LF | benign            |
| rs6022903 | NP_003648 | G | E | GE | benign            |
| rs6024235 | XP_028810 | P | L | PL | probably damaging |
| rs6024909 | NP_057491 | T | A | TA | benign            |
| rs6025516 | NP_003601 | L | F | LF | possibly damaging |

|           |           |   |   |    |                   |
|-----------|-----------|---|---|----|-------------------|
| rs6025606 | NP_542185 | T | A | TA | benign            |
| rs6026113 | NP_065069 | A | S | AS | benign            |
| rs6026151 | XP_086650 | R | W | RW | probably damaging |
| rs6026192 | NP_065724 | G | S | GS | possibly damaging |
| rs6027210 | NP_071389 | Y | C | YC | probably damaging |
| rs6028244 | NP_068750 | P | L | PL | probably damaging |
| rs6029542 | NP_003277 | G | S | GS | possibly damaging |
| rs6029673 | NP_115597 | P | L | PL | probably damaging |
| rs6029674 | NP_115597 | P | L | PL | possibly damaging |
| rs6029707 | NP_115597 | P | L | PL | probably damaging |
| rs6030948 | NP_056293 | H | R | HR | possibly damaging |
| rs6031602 | NP_000448 | P | L | PL | probably damaging |
| rs6031602 | NP_849180 | P | L | PL | probably damaging |
| rs6031861 | NP_647539 | F | Y | FY | benign            |
| rs6031861 | NP_003395 | F | Y | FY | benign            |
| rs6032575 | NP_542175 | P | L | PL | probably damaging |
| rs6032577 | NP_542787 | H | Q | HQ | probably damaging |
| rs6032606 | NP_071378 | S | T | ST | benign            |
| rs6032623 | NP_004985 | P | L | PL | probably damaging |
| rs6032913 | NP_000205 | G | S | GS | possibly damaging |
| rs6033876 | XP_209363 | G | E | GE | possibly damaging |
| rs6034239 | NP_061026 | L | S | LS | possibly damaging |
| rs6034464 | NP_078980 | M | T | MT | benign            |
| rs6034867 | NP_004578 | H | L | HL | benign            |
| rs6035037 | NP_060622 | G | S | GS | benign            |
| rs6036399 | NP_071363 | A | T | AT | possibly damaging |
| rs6036661 | NP_077301 | G | S | GS | benign            |
| rs6037077 | NP_002853 | P | L | PL | benign            |
| rs6037626 | NP_036202 | L | F | LF | benign            |
| rs6037626 | NP_647538 | L | F | LF | benign            |
| rs6037626 | NP_647537 | L | F | LF | benign            |
| rs6037651 | NP_075556 | V | M | VM | benign            |
| rs6037782 | NP_787034 | P | L | PL | probably damaging |
| rs6037782 | NP_787036 | P | L | PL | probably damaging |
| rs6037782 | NP_787033 | P | L | PL | probably damaging |
| rs6040067 | NP_000205 | V | I | VI | benign            |
| rs6042203 | NP_060184 | G | S | GS | benign            |
| rs6042368 | NP_077025 | L | F | LF | benign            |
| rs6042507 | XP_209363 | E | A | EA | benign            |
| rs6045115 | NP_689413 | P | L | PL | probably damaging |
| rs6045116 | NP_689413 | P | L | PL | probably damaging |
| rs6045322 | NP_003425 | R | K | RK | benign            |
| rs6045391 | NP_060622 | S | C | SC | possibly damaging |
| rs6045440 | NP_116781 | P | L | PL | probably damaging |
| rs6045442 | NP_116781 | P | L | PL | probably damaging |
| rs6046368 | NP_695001 | K | N | KN | benign            |

|           |           |   |   |    |                   |
|-----------|-----------|---|---|----|-------------------|
| rs6046544 | NP_852668 | G | S | GS | possibly damaging |
| rs6046544 | NP_852669 | G | S | GS | possibly damaging |
| rs6046544 | NP_057184 | G | S | GS | possibly damaging |
| rs6046905 | XP_046600 | R | K | RK | benign            |
| rs6046906 | XP_046600 | R | K | RK | benign            |
| rs6046965 | XP_046600 | P | L | PL | probably damaging |
| rs6047420 | NP_036387 | R | C | RC | possibly damaging |
| rs6048538 | NP_036204 | S | Y | SY | benign            |
| rs6048760 | NP_071927 | Q | P | QP | benign            |
| rs6048766 | NP_071927 | D | N | DN | benign            |
| rs6049415 | NP_077301 | P | L | PL | probably damaging |
| rs6050063 | NP_542789 | K | R | KR | benign            |
| rs6050249 | NP_115890 | V | M | VM | benign            |
| rs6050307 | NP_955457 | R | S | RS | benign            |
| rs6050307 | NP_055403 | R | S | RS | benign            |
| rs6050446 | NP_001238 | E | K | EK | benign            |
| rs6051452 | NP_536338 | I | L | IL | benign            |
| rs6051452 | NP_072097 | I | L | IL | benign            |
| rs6051545 | NP_847901 | A | V | AV | benign            |
| rs6051545 | NP_847902 | A | V | AV | benign            |
| rs6051545 | NP_001492 | A | V | AV | benign            |
| rs6053426 | NP_787073 | I | K | IK | probably damaging |
| rs6053427 | NP_787073 | A | T | AT | benign            |
| rs6053827 | NP_061968 | G | R | GR | possibly damaging |
| rs6053860 | NP_689824 | E | K | EK | benign            |
| rs6053892 | NP_060141 | Q | H | QH | possibly damaging |
| rs6054614 | NP_212134 | D | G | DG | benign            |
| rs6055290 | NP_997004 | L | I | LI | benign            |
| rs6056634 | NP_000924 | M | L | ML | possibly damaging |
| rs6056634 | NP_877949 | M | L | ML | possibly damaging |
| rs6057581 | NP_056153 | L | F | LF | benign            |
| rs6057717 | NP_872599 | H | Q | HQ | benign            |
| rs6057900 | NP_116208 | A | T | AT | benign            |
| rs6058693 | NP_056153 | V | I | VI | benign            |
| rs6058694 | NP_056153 | P | L | PL | benign            |
| rs6059063 | NP_872599 | Y | C | YC | benign            |
| rs6059745 | NP_001663 | P | L | PL | benign            |
| rs6059862 | NP_113671 | R | K | RK | benign            |
| rs6060022 | NP_054790 | I | V | IV | benign            |
| rs6060031 | NP_054790 | P | L | PL | probably damaging |
| rs6060147 | XP_371398 | A | V | AV | benign            |
| rs6060148 | XP_371398 | Q | R | QR | probably damaging |
| rs6060248 | NP_060687 | R | Q | RQ | benign            |
| rs6060465 | NP_938408 | G | S | GS | benign            |
| rs6060465 | NP_057050 | G | S | GS | benign            |
| rs6060714 | NP_361012 | T | I | TI | benign            |

|           |           |   |   |    |                   |
|-----------|-----------|---|---|----|-------------------|
| rs6060750 | NP_543024 | S | P | SP | probably damaging |
| rs6060966 | NP_149109 | K | N | KN | benign            |
| rs6060969 | NP_149109 | G | R | GR | probably damaging |
| rs6061210 | NP_848560 | V | I | VI | benign            |
| rs6061520 | NP_543023 | L | V | LV | benign            |
| rs6062133 | NP_056481 | G | S | GS | benign            |
| rs6062179 | NP_055650 | L | F | LF | possibly damaging |
| rs6062179 | NP_653081 | L | F | LF | possibly damaging |
| rs6062223 | NP_005551 | V | M | VM | benign            |
| rs6062554 | NP_542189 | S | N | SN | benign            |
| rs6062592 | NP_060329 | L | F | LF | benign            |
| rs6062599 | NP_065764 | A | T | AT | benign            |
| rs6062627 | NP_872588 | Q | H | QH | benign            |
| rs6062680 | NP_060727 | G | S | GS | possibly damaging |
| rs6063343 | NP_006411 | A | V | AV | benign            |
| rs6063377 | NP_060365 | S | G | SG | benign            |
| rs6063921 | NP_775756 | P | L | PL | benign            |
| rs6063966 | NP_006517 | V | I | VI | benign            |
| rs6065316 | NP_002651 | L | F | LF | benign            |
| rs6065316 | NP_877963 | L | F | LF | benign            |
| rs6065903 | NP_872617 | R | W | RW | probably damaging |
| rs6065903 | NP_006218 | R | W | RW | probably damaging |
| rs6066247 | NP_898868 | P | L | PL | possibly damaging |
| rs6066247 | NP_036540 | P | L | PL | possibly damaging |
| rs6066247 | NP_898869 | P | L | PL | probably damaging |
| rs6066424 | NP_006525 | L | V | LV | benign            |
| rs6066424 | NP_858045 | L | V | LV | benign            |
| rs6066430 | NP_940998 | L | M | LM | benign            |
| rs6066430 | NP_061325 | L | M | LM | benign            |
| rs6066805 | NP_065871 | S | N | SN | benign            |
| rs6067121 | NP_000952 | Q | H | QH | benign            |
| rs6067232 | NP_056081 | A | T | AT | benign            |
| rs6067593 | NP_110517 | L | I | LI | benign            |
| rs6067777 | NP_775114 | P | L | PL | probably damaging |
| rs6067785 | NP_775114 | T | N | TN | benign            |
| rs6068589 | NP_006517 | M | V | MV | benign            |
| rs6068699 | XP_372870 | P | L | PL | probably damaging |
| rs6069717 | NP_003591 | G | R | GR | benign            |
| rs6069717 | NP_940835 | G | R | GR | benign            |
| rs6069717 | NP_940836 | G | R | GR | benign            |
| rs6069717 | NP_940837 | G | R | GR | benign            |
| rs6069717 | NP_940838 | G | R | GR | benign            |
| rs6069717 | NP_940839 | G | R | GR | benign            |
| rs6069926 | NP_004130 | G | S | GS | benign            |
| rs6069986 | NP_055717 | L | F | LF | benign            |
| rs6069986 | NP_892118 | L | F | LF | possibly damaging |

|           |           |   |   |    |                   |
|-----------|-----------|---|---|----|-------------------|
| rs6070122 | NP_542185 | Q | E | QE | benign            |
| rs6070128 | NP_542185 | E | Q | EQ | benign            |
| rs6070697 | NP_110400 | R | H | RH | benign            |
| rs6071006 | NP_055073 | T | I | TI | possibly damaging |
| rs6071059 | NP_817089 | G | R | GR | probably damaging |
| rs6071067 | NP_817089 | P | L | PL | probably damaging |
| rs6071069 | NP_817089 | A | S | AS | benign            |
| rs6073538 | NP_071753 | P | T | PT | benign            |
| rs6073648 | NP_002942 | G | R | GR | possibly damaging |
| rs6073652 | NP_543145 | G | R | GR | possibly damaging |
| rs6074204 | NP_848693 | L | F | LF | benign            |
| rs6074550 | NP_060797 | Y | H | YH | benign            |
| rs6074681 | XP_209363 | S | I | SI | benign            |
| rs6076020 | NP_036204 | G | C | GC | benign            |
| rs6076022 | NP_036204 | Q | H | QH | benign            |
| rs6076347 | XP_375911 | V | I | VI | benign            |
| rs6076383 | NP_056470 | G | S | GS | benign            |
| rs6076437 | NP_072097 | P | L | PL | possibly damaging |
| rs6076556 | NP_060817 | P | L | PL | probably damaging |
| rs6077510 | NP_000924 | T | A | TA | benign            |
| rs6077510 | NP_877949 | T | A | TA | benign            |
| rs6077563 | NP_817127 | S | I | SI | possibly damaging |
| rs6077853 | XP_059267 | R | Q | RQ | benign            |
| rs6077862 | NP_000205 | H | Q | HQ | probably damaging |
| rs6077865 | NP_000205 | G | C | GC | probably damaging |
| rs6078529 | NP_055538 | A | S | AS | benign            |
| rs6079171 | NP_057733 | P | L | PL | probably damaging |
| rs6079391 | NP_938205 | H | Q | HQ | benign            |
| rs6080719 | NP_001186 | G | S | GS | benign            |
| rs6081011 | NP_808779 | P | L | PL | probably damaging |
| rs6081027 | NP_808779 | A | S | AS | benign            |
| rs6081370 | XP_497758 | L | Q | LQ | probably damaging |
| rs6081371 | XP_497758 | A | T | AT | benign            |
| rs6081830 | NP_061866 | G | S | GS | benign            |
| rs6082984 | NP_001043 | G | S | GS | benign            |
| rs6083553 | NP_079169 | G | R | GR | possibly damaging |
| rs6084275 | NP_068598 | P | L | PL | probably damaging |
| rs6084434 | NP_694882 | R | K | RK | benign            |
| rs6084434 | NP_079496 | R | K | RK | benign            |
| rs6084654 | NP_787033 | R | P | RP | possibly damaging |
| rs6085324 | NP_001810 | S | T | ST | benign            |
| rs6085329 | NP_057023 | Q | H | QH | possibly damaging |
| rs6085333 | NP_877954 | A | P | AP | benign            |
| rs6085333 | NP_115874 | A | P | AP | benign            |
| rs6085343 | NP_061968 | A | T | AT | benign            |
| rs6086575 | NP_877398 | R | K | RK | benign            |



|           |           |   |   |    |                   |
|-----------|-----------|---|---|----|-------------------|
| rs6086575 | NP_056007 | R | K | RK | benign            |
| rs6086931 | NP_817127 | L | F | LF | benign            |
| rs6087119 | NP_942093 | R | Q | RQ | possibly damaging |
| rs6087680 | NP_851998 | L | M | LM | benign            |
| rs6087680 | NP_002156 | L | M | LM | benign            |
| rs6087714 | NP_009117 | A | D | AD | benign            |
| rs6087870 | NP_004789 | Q | H | QH | benign            |
| rs6088066 | NP_079503 | K | M | KM | benign            |
| rs6088729 | NP_851998 | S | R | SR | benign            |
| rs6088729 | NP_002156 | S | R | SR | benign            |
| rs6088810 | NP_060714 | P | L | PL | probably damaging |
| rs6088810 | NP_955781 | P | L | PL | probably damaging |
| rs6088868 | NP_009117 | A | D | AD | benign            |
| rs6088929 | NP_004893 | P | L | PL | probably damaging |
| rs6088929 | NP_909122 | P | L | PL | probably damaging |
| rs6089009 | NP_818932 | R | K | RK | possibly damaging |
| rs6089009 | NP_036288 | R | K | RK | possibly damaging |
| rs6089015 | NP_818932 | R | K | RK | benign            |
| rs6089015 | NP_036288 | R | K | RK | benign            |
| rs6089016 | NP_818932 | P | R | PR | possibly damaging |
| rs6089016 | NP_036288 | P | R | PR | probably damaging |
| rs6089095 | NP_004109 | T | I | TI | benign            |
| rs6089165 | NP_002101 | T | I | TI | benign            |
| rs6089166 | NP_002101 | S | I | SI | probably damaging |
| rs6089219 | XP_496479 | T | K | TK | possibly damaging |
| rs6089366 | NP_543023 | E | K | EK | benign            |
| rs6089387 | NP_536721 | G | R | GR | probably damaging |
| rs6089558 | NP_001785 | A | D | AD | benign            |
| rs6089728 | NP_005551 | R | C | RC | benign            |
| rs6089764 | NP_852149 | P | L | PL | probably damaging |
| rs6089764 | NP_852150 | P | L | PL | probably damaging |
| rs6089764 | NP_115916 | P | L | PL | probably damaging |
| rs6089959 | NP_057518 | G | S | GS | benign            |
| rs6089959 | NP_116575 | G | S | GS | benign            |
| rs6090066 | NP_004526 | G | S | GS | benign            |
| rs6090070 | NP_004526 | D | N | DN | benign            |
| rs6090151 | NP_057438 | R | K | RK | benign            |
| rs6090160 | NP_071388 | P | L | PL | probably damaging |
| rs6090160 | NP_542986 | P | L | PL | probably damaging |
| rs6090160 | NP_542987 | P | L | PL | probably damaging |
| rs6090161 | NP_071388 | P | L | PL | probably damaging |
| rs6090161 | NP_542986 | P | L | PL | probably damaging |
| rs6090161 | NP_542987 | P | L | PL | probably damaging |
| rs6090343 | NP_783202 | Q | H | QH | possibly damaging |
| rs6090343 | NP_060679 | Q | H | QH | possibly damaging |
| rs6091375 | NP_065169 | I | L | IL | benign            |

|           |           |   |   |    |                   |
|-----------|-----------|---|---|----|-------------------|
| rs6091654 | NP_055472 | K | E | KE | benign            |
| rs6092491 | NP_542185 | R | H | RH | benign            |
| rs6092497 | NP_002582 | P | L | PL | probably damaging |
| rs6092501 | NP_110403 | Q | H | QH | benign            |
| rs6092514 | NP_954638 | G | S | GS | benign            |
| rs6092514 | NP_954640 | G | S | GS | benign            |
| rs6093434 | NP_689470 | G | S | GS | benign            |
| rs6093571 | NP_008981 | R | K | RK | benign            |
| rs6093571 | NP_573400 | R | K | RK | benign            |
| rs6093980 | NP_000448 | L | F | LF | benign            |
| rs6093980 | NP_849180 | L | F | LF | benign            |
| rs6093980 | NP_849181 | L | F | LF | benign            |
| rs6094061 | NP_006800 | R | K | RK | benign            |
| rs6094231 | NP_071378 | G | S | GS | benign            |
| rs6094438 | NP_110404 | A | S | AS | benign            |
| rs6094645 | NP_036540 | G | S | GS | benign            |
| rs6094645 | NP_898868 | G | S | GS | possibly damaging |
| rs6094645 | NP_898869 | G | S | GS | possibly damaging |
| rs6094752 | NP_006525 | R | C | RC | probably damaging |
| rs6094752 | NP_858045 | R | C | RC | probably damaging |
| rs6094755 | NP_006525 | P | L | PL | probably damaging |
| rs6094755 | NP_858045 | P | L | PL | probably damaging |
| rs6094756 | NP_006525 | L | F | LF | benign            |
| rs6094756 | NP_858045 | L | F | LF | benign            |
| rs6095318 | NP_065871 | L | M | LM | benign            |
| rs6095427 | NP_001307 | A | T | AT | benign            |
| rs6096164 | NP_852107 | G | S | GS | benign            |
| rs6096166 | NP_852107 | P | L | PL | probably damaging |
| rs6096533 | XP_030577 | L | F | LF | benign            |
| rs6097319 | NP_775756 | A | T | AT | benign            |
| rs6099115 | NP_543011 | P | S | PS | possibly damaging |
| rs6100055 | NP_065069 | R | Q | RQ | benign            |
| rs6100056 | NP_065069 | R | K | RK | benign            |
| rs6100072 | NP_699191 | S | N | SN | benign            |
| rs6100663 | NP_006233 | R | K | RK | benign            |
| rs6100927 | NP_542119 | G | S | GS | possibly damaging |
| rs6101367 | NP_068750 | G | R | GR | possibly damaging |
| rs6102365 | XP_372866 | P | L | PL | probably damaging |
| rs6102410 | NP_115597 | L | F | LF | benign            |
| rs6103584 | NP_116272 | V | A | VA | benign            |
| rs6103955 | NP_006273 | R | K | RK | benign            |
| rs6104066 | NP_002999 | G | S | GS | benign            |
| rs6104216 | NP_852611 | R | K | RK | benign            |
| rs6104386 | NP_542170 | F | L | FL | benign            |
| rs6104428 | NP_004985 | R | K | RK | benign            |
| rs6105156 | NP_061327 | R | Q | RQ | possibly damaging |

|           |           |   |   |    |                   |
|-----------|-----------|---|---|----|-------------------|
| rs6105156 | NP_872289 | R | Q | RQ | possibly damaging |
| rs6105156 | NP_057227 | R | Q | RQ | possibly damaging |
| rs6107308 | NP_036202 | D | A | DA | benign            |
| rs6107308 | NP_647538 | D | A | DA | benign            |
| rs6107308 | NP_647537 | D | A | DA | benign            |
| rs6107314 | NP_036202 | L | F | LF | benign            |
| rs6107314 | NP_647538 | L | F | LF | benign            |
| rs6107314 | NP_647537 | L | F | LF | benign            |
| rs6107751 | NP_689824 | L | P | LP | probably damaging |
| rs6108299 | NP_000924 | S | F | SF | possibly damaging |
| rs6108299 | NP_877949 | S | F | SF | possibly damaging |
| rs6109963 | NP_060184 | G | S | GS | benign            |
| rs6110025 | NP_061327 | R | K | RK | benign            |
| rs6110025 | NP_872289 | R | K | RK | benign            |
| rs6110025 | NP_057227 | R | K | RK | benign            |
| rs6111264 | NP_937863 | E | K | EK | possibly damaging |
| rs6111951 | NP_060622 | G | R | GR | probably damaging |
| rs6112001 | NP_116781 | R | T | RT | possibly damaging |
| rs6112008 | NP_116781 | L | M | LM | benign            |
| rs6112935 | XP_046600 | L | F | LF | benign            |
| rs6112939 | XP_046600 | R | Q | RQ | benign            |
| rs6114063 | NP_037380 | N | K | NK | probably damaging |
| rs6114068 | NP_071927 | K | N | KN | benign            |
| rs6114069 | NP_071927 | S | I | SI | benign            |
| rs6114486 | NP_077301 | P | L | PL | probably damaging |
| rs6115023 | NP_055403 | D | E | DE | benign            |
| rs6115125 | NP_002853 | P | L | PL | probably damaging |
| rs6115242 | NP_542789 | E | Q | EQ | benign            |
| rs6115249 | NP_056470 | P | L | PL | probably damaging |
| rs6115671 | NP_079234 | G | S | GS | benign            |
| rs6115950 | NP_036202 | G | S | GS | possibly damaging |
| rs6115950 | NP_647538 | G | S | GS | possibly damaging |
| rs6115950 | NP_647537 | G | S | GS | possibly damaging |
| rs6117014 | NP_877954 | K | N | KN | benign            |
| rs6117014 | NP_115874 | K | N | KN | benign            |
| rs6117050 | NP_689824 | L | F | LF | benign            |
| rs6118003 | NP_060015 | R | K | RK | benign            |
| rs6118041 | NP_620713 | P | L | PL | probably damaging |
| rs6118603 | NP_000924 | G | S | GS | possibly damaging |
| rs6118603 | NP_877949 | G | S | GS | possibly damaging |
| rs6118865 | NP_942093 | L | F | LF | benign            |
| rs6118866 | NP_942093 | P | L | PL | probably damaging |
| rs6119662 | NP_057520 | P | L | PL | probably damaging |
| rs6119663 | NP_057520 | P | L | PL | probably damaging |
| rs6119664 | NP_057520 | P | L | PL | probably damaging |
| rs6120180 | NP_570913 | L | F | LF | benign            |

|           |           |   |   |    |                   |
|-----------|-----------|---|---|----|-------------------|
| rs6120181 | NP_570913 | P | L | PL | probably damaging |
| rs6120221 | NP_149974 | S | P | SP | benign            |
| rs6120222 | NP_149974 | S | I | SI | benign            |
| rs6120366 | NP_116208 | S | I | SI | possibly damaging |
| rs6120367 | NP_116208 | G | R | GR | possibly damaging |
| rs6120453 | XP_371395 | G | S | GS | benign            |
| rs6120454 | XP_371395 | R | K | RK | benign            |
| rs6120789 | NP_955400 | R | K | RK | benign            |
| rs6120789 | NP_056453 | R | K | RK | benign            |
| rs6120850 | NP_060687 | S | I | SI | possibly damaging |
| rs6121176 | NP_818932 | R | Q | RQ | benign            |
| rs6121176 | NP_036288 | R | Q | RQ | benign            |
| rs6121183 | NP_056326 | P | T | PT | probably damaging |
| rs6121233 | XP_372864 | L | S | LS | benign            |
| rs6121577 | NP_543023 | P | L | PL | probably damaging |
| rs6121579 | NP_543023 | E | K | EK | benign            |
| rs6121906 | NP_002783 | R | K | RK | probably damaging |
| rs6122203 | NP_955391 | A | V | AV | benign            |
| rs6122203 | NP_955392 | A | V | AV | benign            |
| rs6122203 | NP_955393 | A | V | AV | benign            |
| rs6122203 | NP_955394 | A | V | AV | benign            |
| rs6122203 | NP_955395 | A | V | AV | benign            |
| rs6122203 | NP_003279 | A | V | AV | benign            |
| rs6122246 | NP_005864 | Q | H | QH | benign            |
| rs6122312 | NP_031372 | S | I | SI | possibly damaging |
| rs6122313 | NP_031372 | R | S | RS | benign            |
| rs6122315 | NP_031372 | S | T | ST | benign            |
| rs6122396 | NP_060268 | P | Q | PQ | possibly damaging |
| rs6122480 | NP_036516 | L | F | LF | benign            |
| rs6122487 | NP_036516 | L | M | LM | benign            |
| rs6122801 | NP_004767 | Y | C | YC | probably damaging |
| rs6124571 | NP_056293 | L | F | LF | benign            |
| rs6124698 | NP_003824 | G | S | GS | possibly damaging |
| rs6124698 | NP_085080 | G | S | GS | possibly damaging |
| rs6124698 | NP_085095 | G | S | GS | possibly damaging |
| rs6124823 | NP_073740 | P | R | PR | probably damaging |
| rs6125056 | NP_006525 | P | L | PL | benign            |
| rs6125056 | NP_858045 | P | L | PL | benign            |
| rs6125068 | NP_940998 | S | N | SN | benign            |
| rs6125068 | NP_061325 | S | N | SN | benign            |
| rs6126121 | NP_852107 | P | L | PL | probably damaging |
| rs6126269 | XP_030577 | G | R | GR | possibly damaging |
| rs6126344 | NP_065169 | L | R | LR | benign            |
| rs6126799 | NP_775756 | R | K | RK | benign            |
| rs6127031 | NP_003648 | Q | H | QH | benign            |
| rs6127140 | NP_002614 | E | Q | EQ | benign            |

|           |           |   |   |    |                   |
|-----------|-----------|---|---|----|-------------------|
| rs6127231 | NP_060901 | D | N | DN | benign            |
| rs6128079 | NP_002582 | P | L | PL | probably damaging |
| rs6128714 | NP_055073 | V | A | VA | benign            |
| rs6128739 | NP_068582 | L | F | LF | benign            |
| rs6128739 | NP_817089 | L | F | LF | benign            |
| rs6128740 | NP_068582 | P | L | PL | probably damaging |
| rs6128740 | NP_817089 | P | L | PL | probably damaging |
| rs6129757 | NP_003277 | E | K | EK | benign            |
| rs6129847 | NP_115597 | R | K | RK | benign            |
| rs6130037 | NP_056289 | Y | C | YC | benign            |
| rs6130063 | NP_008981 | S | I | SI | benign            |
| rs6130063 | NP_573400 | S | I | SI | benign            |
| rs6130514 | NP_116272 | S | N | SN | benign            |
| rs6130805 | NP_003824 | P | L | PL | probably damaging |
| rs6130805 | NP_085080 | P | L | PL | probably damaging |
| rs6130805 | NP_085095 | P | L | PL | probably damaging |
| rs6130886 | NP_742003 | D | H | DH | benign            |
| rs6130960 | NP_542790 | N | H | NH | benign            |
| rs6130965 | NP_872617 | S | F | SF | benign            |
| rs6130965 | NP_006218 | S | F | SF | benign            |
| rs6130982 | NP_071378 | R | C | RC | possibly damaging |
| rs6131323 | NP_055538 | R | C | RC | benign            |
| rs6131835 | NP_078980 | G | R | GR | possibly damaging |
| rs6132996 | NP_002827 | P | L | PL | benign            |
| rs6132996 | NP_543031 | P | L | PL | possibly damaging |
| rs6133050 | NP_036202 | A | V | AV | benign            |
| rs6133050 | NP_647538 | A | V | AV | benign            |
| rs6133050 | NP_647537 | A | V | AV | benign            |
| rs6133278 | NP_001810 | D | N | DN | benign            |
| rs6133918 | NP_740754 | R | K | RK | benign            |
| rs6134758 | NP_060797 | T | A | TA | benign            |
| rs6135774 | NP_078980 | S | N | SN | benign            |
| rs6135876 | NP_064542 | L | P | LP | possibly damaging |
| rs6136153 | NP_004578 | L | M | LM | benign            |
| rs6136386 | NP_006457 | R | K | RK | benign            |
| rs6136807 | NP_065740 | G | S | GS | benign            |
| rs6137081 | XP_046600 | S | N | SN | benign            |
| rs6137317 | NP_036387 | R | H | RH | benign            |
| rs6137324 | NP_036387 | R | K | RK | benign            |
| rs6137954 | NP_543020 | L | F | LF | benign            |
| rs6137954 | NP_570612 | L | F | LF | benign            |
| rs6138429 | NP_003641 | A | S | AS | benign            |
| rs6138482 | NP_955457 | R | H | RH | benign            |
| rs6138541 | NP_001238 | S | N | SN | benign            |
| rs6139012 | NP_055763 | A | D | AD | possibly damaging |
| rs6139012 | NP_955447 | A | D | AD | possibly damaging |

|           |           |   |   |    |                   |
|-----------|-----------|---|---|----|-------------------|
| rs6139131 | NP_112504 | Q | H | QH | benign            |
| rs6139131 | NP_112505 | Q | H | QH | benign            |
| rs6139131 | NP_006453 | Q | H | QH | benign            |
| rs6139131 | NP_112506 | Q | H | QH | benign            |
| rs6139158 | NP_036202 | G | S | GS | possibly damaging |
| rs6139158 | NP_647538 | G | S | GS | possibly damaging |
| rs6139158 | NP_647537 | G | S | GS | possibly damaging |
| rs6139194 | NP_443202 | R | H | RH | benign            |
| rs6139196 | NP_443202 | E | K | EK | benign            |
| rs6139873 | NP_001810 | R | Q | RQ | possibly damaging |
| rs6139876 | NP_057023 | E | K | EK | benign            |
| rs6140402 | NP_997004 | A | T | AT | benign            |
| rs6140807 | XP_297816 | R | Q | RQ | benign            |
| rs6141383 | NP_149974 | V | M | VM | benign            |
| rs6141816 | NP_787044 | E | K | EK | benign            |
| rs6141816 | NP_787045 | E | K | EK | benign            |
| rs6141816 | NP_787046 | E | K | EK | benign            |
| rs6141816 | NP_008823 | V | M | VM | benign            |
| rs6141831 | NP_695021 | L | F | LF | benign            |
| rs6142471 | NP_543024 | T | A | TA | benign            |
| rs6142528 | NP_818932 | A | T | AT | benign            |
| rs6142528 | NP_036288 | A | T | AT | benign            |
| rs6142531 | NP_818932 | R | P | RP | possibly damaging |
| rs6142531 | NP_036288 | R | P | RP | possibly damaging |
| rs6142592 | NP_542192 | P | L | PL | probably damaging |
| rs6142638 | NP_002648 | P | L | PL | benign            |
| rs6142775 | NP_536721 | T | P | TP | benign            |
| rs6142884 | NP_001785 | K | R | KR | benign            |
| rs6143021 | NP_005551 | H | R | HR | benign            |
| rs6151411 | NP_000478 | P | L | PL | probably damaging |
| rs6151415 | NP_000478 | W | C | WC | probably damaging |
| rs6151422 | NP_000478 | F | V | FV | benign            |
| rs6151427 | NP_000478 | N | S | NS | possibly damaging |
| rs6151428 | NP_000478 | R | H | RH | benign            |
| rs6151509 | NP_004321 | S | T | ST | benign            |
| rs6413413 | NP_000659 | T | S | TS | benign            |
| rs6413419 | NP_000764 | V | I | VI | benign            |
| rs6413438 | NP_000760 | P | L | PL | probably damaging |
| rs6413462 | NP_001748 | V | I | VI | benign            |
| rs6413463 | NP_000068 | H | Q | HQ | probably damaging |
| rs6413464 | NP_000068 | A | S | AS | benign            |
| rs6413474 | NP_000753 | K | R | KR | benign            |
| rs6413478 | NP_001946 | V | I | VI | benign            |
| rs6413481 | NP_001954 | G | R | GR | probably damaging |
| rs6413484 | NP_000154 | V | F | VF | benign            |
| rs6413485 | NP_005304 | K | R | KR | benign            |

|           |           |   |   |    |                   |
|-----------|-----------|---|---|----|-------------------|
| rs6413489 | NP_000867 | R | Q | RQ | benign            |
| rs6413491 | NP_000867 | A | T | AT | benign            |
| rs6413498 | NP_002169 | R | Q | RQ | benign            |
| rs6413500 | NP_000409 | S | L | SL | possibly damaging |
| rs6413508 | NP_002476 | P | L | PL | benign            |
| rs6413532 | NP_055394 | G | E | GE | possibly damaging |
| rs6413537 | NP_001042 | S | F | SF | possibly damaging |
| rs6414624 | NP_714928 | Y | H | YH | possibly damaging |
| rs6415788 | NP_689842 | Q | P | QP | benign            |
| rs6416668 | NP_001162 | V | M | VM | benign            |
| rs6420424 | NP_877417 | R | W | RW | benign            |
| rs6421985 | NP_612202 | L | M | LM | benign            |
| rs6422224 | XP_496026 | N | T | NT | benign            |
| rs6425977 | NP_005110 | V | A | VA | benign            |
| rs6426616 | XP_372769 | Q | R | QR | benign            |
| rs6427128 | NP_003806 | K | T | KT | benign            |
| rs6427128 | NP_997077 | K | T | KT | benign            |
| rs6427128 | NP_997078 | K | T | KT | benign            |
| rs6427128 | NP_997079 | K | T | KT | benign            |
| rs6427128 | NP_997080 | K | T | KT | benign            |
| rs6427128 | NP_997074 | K | T | KT | benign            |
| rs6427235 | XP_089281 | S | P | SP | benign            |
| rs6427384 | NP_112571 | I | V | IV | benign            |
| rs6427504 | NP_653300 | D | G | DG | probably damaging |
| rs6428388 | NP_060606 | R | G | RG | probably damaging |
| rs6428538 | XP_375746 | I | M | IM | benign            |
| rs6429745 | NP_056933 | R | Q | RQ | benign            |
| rs6429757 | NP_079034 | G | R | GR | benign            |
| rs6430896 | XP_496601 | N | S | NS | benign            |
| rs6430897 | XP_496601 | D | E | DE | benign            |
| rs6431625 | NP_061966 | V | A | VA | benign            |
| rs6431634 | XP_371603 | V | A | VA | benign            |
| rs6432225 | NP_036476 | V | A | VA | benign            |
| rs6433295 | XP_376154 | Q | P | QP | probably damaging |
| rs6433296 | XP_376154 | R | P | RP | probably damaging |
| rs6433818 | XP_034594 | S | R | SR | possibly damaging |
| rs6434197 | NP_872327 | Y | C | YC | probably damaging |
| rs6435421 | XP_371592 | C | R | CR | possibly damaging |
| rs6436058 | NP_065986 | S | L | SL | benign            |
| rs6436153 | NP_061144 | P | Q | PQ | possibly damaging |
| rs6436153 | NP_878267 | P | Q | PQ | possibly damaging |
| rs6436155 | NP_078812 | R | Q | RQ | benign            |
| rs6436669 | NP_112734 | G | E | GE | benign            |
| rs6438191 | NP_009067 | R | H | RH | benign            |
| rs6438544 | NP_203528 | P | A | PA | probably damaging |
| rs6438869 | XP_087386 | M | T | MT | benign            |

|           |           |   |   |    |                   |
|-----------|-----------|---|---|----|-------------------|
| rs6441977 | NP_003956 | V | M | VM | benign            |
| rs6442089 | NP_002366 | V | I | VI | benign            |
| rs6442827 | NP_006605 | I | V | IV | benign            |
| rs6443930 | NP_872343 | G | A | GA | benign            |
| rs6446261 | NP_000572 | A | T | AT | benign            |
| rs6447368 | NP_068746 | P | L | PL | benign            |
| rs6447804 | XP_496692 | A | V | AV | benign            |
| rs6448389 | NP_006415 | G | D | GD | possibly damaging |
| rs6449160 | XP_209656 | H | N | HN | benign            |
| rs6453022 | XP_371755 | P | Q | PQ | benign            |
| rs6453373 | NP_003655 | V | E | VE | possibly damaging |
| rs6454127 | NP_057655 | N | H | NH | benign            |
| rs6456834 | XP_498064 | C | G | CG | probably damaging |
| rs6456880 | XP_212581 | K | Q | KQ | benign            |
| rs6457477 | NP_115859 | R | H | RH | possibly damaging |
| rs6458687 | NP_000246 | V | I | VI | benign            |
| rs6459165 | NP_065121 | K | Q | KQ | benign            |
| rs6459166 | NP_001714 | V | L | VL | benign            |
| rs6460012 | XP_498257 | V | M | VM | benign            |
| rs6460315 | XP_377946 | A | T | AT | benign            |
| rs6460939 | XP_371878 | K | N | KN | benign            |
| rs6461378 | XP_376564 | H | Y | HY | benign            |
| rs6461515 | NP_848654 | K | E | KE | benign            |
| rs6463529 | XP_374396 | L | P | LP | benign            |
| rs6464006 | XP_376576 | N | T | NT | probably damaging |
| rs6464007 | XP_376576 | D | H | DH | probably damaging |
| rs6464008 | XP_376576 | R | C | RC | benign            |
| rs6464011 | XP_496854 | E | G | EG | benign            |
| rs6464201 | NP_071370 | P | S | PS | probably damaging |
| rs6464465 | XP_376684 | F | L | FL | benign            |
| rs6464573 | XP_069619 | A | S | AS | benign            |
| rs6464574 | XP_069619 | A | T | AT | benign            |
| rs6464833 | XP_371960 | I | T | IT | benign            |
| rs6465147 | XP_498223 | H | R | HR | benign            |
| rs6465770 | NP_060454 | T | A | TA | benign            |
| rs6466786 | XP_069734 | F | V | FV | benign            |
| rs6467210 | XP_294357 | R | W | RW | possibly damaging |
| rs6468171 | NP_115898 | Q | R | QR | benign            |
| rs6470147 | NP_060494 | F | I | FI | benign            |
| rs6470187 | NP_659400 | I | V | IV | benign            |
| rs6471482 | NP_061971 | W | C | WC | possibly damaging |
| rs6472285 | NP_066280 | I | T | IT | possibly damaging |
| rs6472812 | NP_056179 | G | R | GR | probably damaging |
| rs6474226 | NP_064515 | I | V | IV | benign            |
| rs6474906 | XP_498305 | R | H | RH | probably damaging |
| rs6475273 | NP_714918 | S | P | SP | benign            |



|           |           |   |   |    |                   |
|-----------|-----------|---|---|----|-------------------|
| rs6475322 | NP_060395 | N | H | NH | benign            |
| rs6478078 | NP_056219 | Q | H | QH | benign            |
| rs6478854 | NP_057474 | T | R | TR | benign            |
| rs6478859 | NP_116198 | E | K | EK | benign            |
| rs6479259 | XP_071093 | N | S | NS | benign            |
| rs6479260 | XP_071093 | F | L | FL | benign            |
| rs6482626 | XP_370541 | L | P | LP | possibly damaging |
| rs6483617 | NP_660093 | R | K | RK | benign            |
| rs6483617 | NP_892009 | R | K | RK | benign            |
| rs6483700 | NP_005779 | N | S | NS | benign            |
| rs6484341 | XP_084514 | D | V | DV | possibly damaging |
| rs6485702 | XP_035037 | I | V | IV | benign            |
| rs6485921 | XP_372378 | A | V | AV | benign            |
| rs6486602 | NP_919337 | S | T | ST | benign            |
| rs6486602 | NP_001971 | S | T | ST | benign            |
| rs6487451 | NP_006143 | T | A | TA | benign            |
| rs6489400 | XP_292109 | F | I | FI | benign            |
| rs6489795 | NP_002553 | T | S | TS | benign            |
| rs6490073 | XP_027045 | V | L | VL | benign            |
| rs6490312 | XP_497370 | T | A | TA | possibly damaging |
| rs6492027 | XP_497383 | C | R | CR | probably damaging |
| rs6495228 | NP_001027 | E | G | EG | possibly damaging |
| rs6496589 | NP_002657 | A | P | AP | possibly damaging |
| rs6496598 | NP_061140 | A | P | AP | possibly damaging |
| rs6497759 | NP_055309 | A | T | AT | benign            |
| rs6499548 | NP_079410 | E | D | ED | benign            |
| rs6500304 | NP_150229 | Y | H | YH | benign            |
| rs6500305 | NP_660188 | T | S | TS | benign            |
| rs6500305 | NP_660190 | T | S | TS | benign            |
| rs6500305 | NP_660191 | T | S | TS | benign            |
| rs6500305 | NP_150229 | T | S | TS | benign            |
| rs6500437 | NP_689500 | W | R | WR | probably damaging |
| rs6500633 | NP_653206 | Q | R | QR | benign            |
| rs6501741 | NP_835454 | G | W | GW | benign            |
| rs6502446 | NP_114104 | V | A | VA | benign            |
| rs6502774 | NP_758955 | S | F | SF | benign            |
| rs6502776 | NP_758955 | G | S | GS | benign            |
| rs6503235 | NP_659491 | K | E | KE | benign            |
| rs6503627 | NP_002268 | A | V | AV | possibly damaging |
| rs6503628 | NP_002268 | A | G | AG | benign            |
| rs6503640 | NP_000517 | Y | C | YC | benign            |
| rs6504191 | NP_000325 | G | S | GS | benign            |
| rs6504255 | XP_496237 | I | V | IV | benign            |
| rs6504459 | NP_002728 | I | V | IV | benign            |
| rs6504649 | NP_071450 | T | R | TR | benign            |
| rs6505140 | NP_203747 | V | A | VA | benign            |

|           |           |   |   |    |                   |
|-----------|-----------|---|---|----|-------------------|
| rs6505727 | XP_497573 | F | I | FI | benign            |
| rs6505776 | NP_112493 | N | T | NT | benign            |
| rs6506448 | XP_371108 | T | S | TS | benign            |
| rs6506948 | NP_055754 | S | L | SL | possibly damaging |
| rs6507992 | NP_659497 | V | I | VI | benign            |
| rs6509138 | NP_037493 | I | L | IL | benign            |
| rs6509358 | NP_071425 | D | N | DN | benign            |
| rs6509544 | NP_443729 | H | Q | HQ | benign            |
| rs6509544 | NP_201586 | H | Q | HQ | possibly damaging |
| rs6509593 | NP_075562 | G | D | GD | possibly damaging |
| rs6509862 | NP_006856 | L | R | LR | benign            |
| rs6510057 | NP_998763 | P | A | PA | benign            |
| rs6510758 | XP_496281 | A | V | AV | benign            |
| rs6511280 | XP_375590 | P | A | PA | probably damaging |
| rs6511281 | XP_375590 | I | T | IT | possibly damaging |
| rs6511379 | XP_065124 | K | T | KT | benign            |
| rs6511763 | XP_371139 | A | P | AP | benign            |
| rs6511874 | XP_064883 | V | A | VA | benign            |
| rs6512087 | NP_473454 | G | E | GE | probably damaging |
| rs6512265 | NP_660299 | P | S | PS | possibly damaging |
| rs6512577 | NP_066363 | M | I | MI | possibly damaging |
| rs6513956 | XP_114158 | S | G | SG | benign            |
| rs6516618 | NP_997354 | K | E | KE | benign            |
| rs6517105 | NP_653260 | H | R | HR | possibly damaging |
| rs6517549 | NP_031367 | N | D | ND | benign            |
| rs6517869 | NP_778146 | S | G | SG | benign            |
| rs6517870 | NP_778146 | V | I | VI | benign            |
| rs6518289 | NP_006022 | V | A | VA | benign            |
| rs6518291 | NP_006022 | I | V | IV | benign            |
| rs6519993 | NP_006062 | L | P | LP | probably damaging |
| rs6520408 | NP_005174 | P | L | PL | probably damaging |
| rs6525447 | NP_116192 | V | L | VL | benign            |
| rs6526155 | NP_037496 | A | V | AV | benign            |
| rs6527569 | XP_379699 | H | R | HR | benign            |
| rs6532068 | XP_496710 | T | I | TI | possibly damaging |
| rs6533514 | XP_497976 | Q | R | QR | benign            |
| rs6533515 | XP_497976 | Q | R | QR | benign            |
| rs6533616 | NP_079420 | N | D | ND | possibly damaging |
| rs6535411 | NP_078948 | D | N | DN | benign            |
| rs6535883 | XP_087500 | M | T | MT | probably damaging |
| rs6537662 | XP_496383 | V | I | VI | benign            |
| rs6537699 | XP_497697 | C | R | CR | benign            |
| rs6537825 | NP_148980 | T | I | TI | benign            |
| rs6537825 | NP_056990 | T | I | TI | benign            |
| rs6540433 | NP_001868 | A | E | AE | benign            |
| rs6540718 | NP_057532 | T | K | TK | benign            |

|           |           |   |   |    |                   |
|-----------|-----------|---|---|----|-------------------|
| rs6542522 | XP_496588 | I | V | IV | benign            |
| rs6544718 | NP_071882 | V | A | VA | benign            |
| rs6544834 | NP_060549 | T | M | TM | benign            |
| rs6552141 | XP_291095 | T | P | TP | possibly damaging |
| rs6552804 | NP_078905 | I | T | IT | benign            |
| rs6553227 | XP_208320 | G | D | GD | possibly damaging |
| rs6553229 | XP_208320 | V | L | VL | benign            |
| rs6553695 | XP_497982 | K | E | KE | benign            |
| rs6556276 | NP_443131 | V | M | VM | benign            |
| rs6557280 | XP_371853 | A | T | AT | possibly damaging |
| rs6558394 | NP_874365 | L | P | LP | probably damaging |
| rs6558394 | NP_056171 | L | P | LP | probably damaging |
| rs6558399 | XP_372063 | T | A | TA | benign            |
| rs6558407 | NP_958786 | R | H | RH | benign            |
| rs6558407 | NP_958785 | R | H | RH | benign            |
| rs6558407 | NP_958784 | R | H | RH | benign            |
| rs6558407 | NP_958783 | R | H | RH | benign            |
| rs6558407 | NP_958782 | R | H | RH | benign            |
| rs6558407 | NP_958781 | R | H | RH | benign            |
| rs6558407 | NP_958780 | R | H | RH | benign            |
| rs6558407 | NP_000436 | R | H | RH | benign            |
| rs6560142 | NP_996830 | Q | R | QR | benign            |
| rs6560142 | NP_996829 | Q | R | QR | benign            |
| rs6560142 | NP_066003 | Q | R | QR | benign            |
| rs6560142 | NP_996828 | Q | R | QR | benign            |
| rs6560142 | NP_996827 | Q | R | QR | benign            |
| rs6560142 | NP_079247 | Q | R | QR | benign            |
| rs6564343 | NP_207837 | Q | H | QH | possibly damaging |
| rs6564343 | NP_620481 | Q | H | QH | probably damaging |
| rs6564838 | NP_877417 | E | G | EG | probably damaging |
| rs6564956 | NP_660151 | S | T | ST | benign            |
| rs6569605 | NP_000417 | V | A | VA | benign            |
| rs6570065 | XP_371838 | N | S | NS | benign            |
| rs6571751 | NP_065099 | K | E | KE | benign            |
| rs6573560 | NP_758953 | T | I | TI | benign            |
| rs6575799 | NP_003827 | G | R | GR | possibly damaging |
| rs6578323 | NP_065947 | T | I | TI | possibly damaging |
| rs6578533 | XP_061627 | N | Y | NY | probably damaging |
| rs6578670 | NP_569073 | T | S | TS | benign            |
| rs6578670 | NP_067629 | T | S | TS | benign            |
| rs6579255 | NP_690908 | Q | R | QR | benign            |
| rs6580012 | NP_114062 | K | E | KE | benign            |
| rs6580012 | NP_061734 | K | E | KE | benign            |
| rs6580126 | XP_209695 | R | L | RL | benign            |
| rs6580870 | NP_005547 | R | H | RH | possibly damaging |
| rs6580873 | NP_002272 | R | L | RL | possibly damaging |

|           |           |   |   |    |                   |
|-----------|-----------|---|---|----|-------------------|
| rs6580904 | NP_056932 | T | A | TA | benign            |
| rs6580942 | NP_036423 | D | A | DA | possibly damaging |
| rs6582584 | XP_047770 | A | G | AG | possibly damaging |
| rs6583272 | XP_171032 | Q | R | QR | benign            |
| rs6583274 | XP_171032 | V | E | VE | possibly damaging |
| rs6583275 | XP_171032 | H | Y | HY | possibly damaging |
| rs6584066 | NP_004079 | G | R | GR | benign            |
| rs6584356 | NP_057196 | R | L | RL | possibly damaging |
| rs6585847 | XP_291697 | T | P | TP | possibly damaging |
| rs6586145 | NP_004181 | F | I | FI | benign            |
| rs6586179 | NP_000226 | G | R | GR | benign            |
| rs6586239 | NP_065690 | A | G | AG | benign            |
| rs6586250 | NP_387510 | R | Q | RQ | benign            |
| rs6586566 | XP_371227 | R | G | RG | benign            |
| rs6587220 | NP_683723 | A | V | AV | benign            |
| rs6587220 | NP_055779 | A | V | AV | benign            |
| rs6587624 | NP_872384 | V | L | VL | benign            |
| rs6587625 | NP_872384 | D | G | DG | possibly damaging |
| rs6587648 | XP_373868 | S | G | SG | benign            |
| rs6587649 | XP_373868 | N | D | ND | benign            |
| rs6587650 | XP_373868 | M | T | MT | benign            |
| rs6587651 | XP_373868 | A | D | AD | benign            |
| rs6587652 | XP_373868 | N | K | NK | benign            |
| rs6587653 | XP_373868 | P | L | PL | probably damaging |
| rs6588100 | NP_065976 | T | M | TM | benign            |
| rs6590021 | XP_166781 | R | W | RW | possibly damaging |
| rs6590022 | XP_166781 | I | T | IT | benign            |
| rs6590942 | XP_374927 | S | N | SN | benign            |
| rs6591182 | XP_170658 | V | G | VG | benign            |
| rs6591270 | NP_000686 | R | H | RH | possibly damaging |
| rs6591324 | XP_166831 | C | R | CR | benign            |
| rs6591536 | XP_166899 | D | N | DN | probably damaging |
| rs6591561 | NP_683876 | M | V | MV | benign            |
| rs6591569 | XP_166871 | F | L | FL | benign            |
| rs6593795 | NP_057445 | M | V | MV | benign            |
| rs6594681 | NP_002378 | R | K | RK | benign            |
| rs6595440 | NP_694955 | L | V | LV | benign            |
| rs6595908 | NP_598377 | G | S | GS | possibly damaging |
| rs6596474 | NP_689898 | A | S | AS | benign            |
| rs6596474 | NP_005838 | A | S | AS | benign            |
| rs6597293 | NP_689913 | G | R | GR | probably damaging |
| rs6597630 | NP_065118 | R | K | RK | benign            |
| rs6597801 | NP_071409 | R | Q | RQ | benign            |
| rs6598679 | NP_079021 | T | M | TM | benign            |
| rs6599079 | NP_005100 | T | I | TI | benign            |
| rs6599241 | NP_006505 | V | M | VM | possibly damaging |

|           |           |   |   |    |                   |
|-----------|-----------|---|---|----|-------------------|
| rs6599528 | NP_777582 | R | S | RS | benign            |
| rs6599743 | NP_997238 | C | R | CR | benign            |
| rs6599891 | XP_496026 | T | A | TA | benign            |
| rs6599902 | XP_496026 | R | W | RW | probably damaging |
| rs6601158 | XP_498029 | T | M | TM | benign            |
| rs6601158 | XP_498031 | T | M | TM | benign            |
| rs6604961 | XP_496343 | P | L | PL | probably damaging |
| rs6604961 | XP_496345 | P | L | PL | probably damaging |
| rs6606009 | XP_497051 | M | T | MT | possibly damaging |
| rs6606566 | NP_945352 | V | A | VA | benign            |
| rs6606582 | NP_940987 | P | L | PL | probably damaging |
| rs6607437 | NP_055328 | N | D | ND | benign            |
| rs6608756 | XP_092995 | A | P | AP | benign            |
| rs6609158 | NP_005291 | R | S | RS | benign            |
| rs6609463 | NP_004642 | R | W | RW | probably damaging |
| rs6609702 | NP_777622 | S | P | SP | probably damaging |
| rs6614290 | NP_957516 | Q | H | QH | benign            |
| rs6614344 | XP_050478 | S | T | ST | benign            |
| rs6616421 | NP_612446 | R | S | RS | benign            |
| rs6616890 | NP_055311 | D | N | DN | benign            |
| rs6621017 | NP_001930 | S | N | SN | benign            |
| rs6621549 | NP_612446 | R | S | RS | possibly damaging |
| rs6621640 | XP_291334 | R | P | RP | probably damaging |
| rs6622126 | NP_078933 | I | T | IT | benign            |
| rs6622613 | XP_497185 | E | K | EK | possibly damaging |
| rs6624371 | XP_373354 | F | L | FL | benign            |
| rs6624535 | NP_061850 | N | K | NK | benign            |
| rs6624547 | NP_031389 | L | P | LP | possibly damaging |
| rs6624600 | NP_997305 | E | K | EK | possibly damaging |
| rs6625346 | XP_373354 | R | Q | RQ | benign            |
| rs6625580 | NP_001542 | R | K | RK | benign            |
| rs6625784 | NP_620278 | W | G | WG | probably damaging |
| rs6625784 | NP_004597 | W | G | WG | probably damaging |
| rs6627455 | NP_005131 | D | H | DH | benign            |
| rs6628025 | NP_004836 | Q | H | QH | benign            |
| rs6632130 | NP_689844 | L | V | LV | benign            |
| rs6632427 | NP_689845 | C | R | CR | probably damaging |
| rs6635182 | NP_061136 | A | P | AP | benign            |
| rs6635230 | XP_066752 | S | F | SF | benign            |
| rs6637826 | NP_001546 | N | H | NH | benign            |
| rs6637934 | NP_919253 | R | H | RH | benign            |
| rs6638192 | XP_298045 | A | V | AV | benign            |
| rs6641350 | NP_005357 | R | P | RP | possibly damaging |
| rs6642535 | NP_835469 | A | T | AT | benign            |
| rs6643533 | NP_003138 | S | G | SG | benign            |
| rs6643651 | NP_005325 | S | I | SI | possibly damaging |

|           |           |   |   |    |                   |
|-----------|-----------|---|---|----|-------------------|
| rs6643652 | NP_005325 | N | S | NS | benign            |
| rs6643670 | NP_006721 | Q | H | QH | benign            |
| rs6643791 | NP_005384 | E | D | ED | benign            |
| rs6643803 | NP_001657 | L | V | LV | benign            |
| rs6643804 | NP_001657 | K | E | KE | benign            |
| rs6646500 | NP_542199 | S | F | SF | benign            |
| rs6646500 | NP_075386 | S | F | SF | benign            |
| rs6646501 | NP_542199 | L | F | LF | benign            |
| rs6646501 | NP_075386 | L | F | LF | benign            |
| rs6647813 | XP_208438 | V | A | VA | benign            |
| rs6648942 | XP_210042 | T | K | TK | possibly damaging |
| rs6649271 | NP_055068 | K | E | KE | benign            |
| rs6650119 | NP_000076 | I | V | IV | benign            |
| rs6650202 | NP_060893 | R | G | RG | possibly damaging |
| rs6650971 | NP_001438 | M | I | MI | benign            |
| rs6651635 | XP_048235 | V | I | VI | benign            |
| rs6653745 | NP_775970 | D | A | DA | benign            |
| rs6653909 | XP_373341 | A | S | AS | benign            |
| rs6654212 | XP_066457 | K | N | KN | benign            |
| rs6654993 | XP_498396 | T | I | TI | probably damaging |
| rs6654994 | XP_498396 | N | I | NI | probably damaging |
| rs6655782 | NP_006594 | N | K | NK | possibly damaging |
| rs6657127 | NP_932340 | S | P | SP | possibly damaging |
| rs6657239 | NP_000341 | R | H | RH | benign            |
| rs6657480 | XP_371257 | M | T | MT | benign            |
| rs6657616 | XP_371237 | D | N | DN | benign            |
| rs6657997 | NP_056372 | S | I | SI | probably damaging |
| rs6658141 | XP_372823 | V | L | VL | benign            |
| rs6658227 | XP_372824 | P | L | PL | probably damaging |
| rs6658256 | XP_372824 | S | L | SL | possibly damaging |
| rs6658335 | NP_277025 | G | R | GR | benign            |
| rs6658335 | NP_277022 | G | R | GR | benign            |
| rs6658371 | NP_653299 | N | K | NK | benign            |
| rs6658555 | NP_938141 | R | Q | RQ | benign            |
| rs6658555 | NP_938142 | R | Q | RQ | benign            |
| rs6658555 | NP_620057 | R | Q | RQ | benign            |
| rs6658555 | NP_620056 | R | Q | RQ | benign            |
| rs6658555 | NP_620055 | R | Q | RQ | benign            |
| rs6658555 | NP_060214 | R | Q | RQ | benign            |
| rs6659176 | NP_068804 | G | A | GA | possibly damaging |
| rs6659222 | NP_055685 | A | T | AT | benign            |
| rs6659520 | NP_115612 | E | K | EK | benign            |
| rs6659553 | NP_060209 | V | M | VM | benign            |
| rs6660068 | NP_775909 | Q | L | QL | benign            |
| rs6660222 | XP_060945 | V | A | VA | benign            |
| rs6660448 | NP_009135 | A | D | AD | benign            |

|           |           |   |   |    |                   |
|-----------|-----------|---|---|----|-------------------|
| rs6661002 | NP_004714 | S | A | SA | benign            |
| rs6661132 | XP_208213 | K | T | KT | benign            |
| rs6661132 | NP_000769 | K | T | KT | benign            |
| rs6661410 | NP_005392 | T | M | TM | benign            |
| rs6661625 | NP_057611 | L | M | LM | benign            |
| rs6661946 | XP_375853 | S | N | SN | benign            |
| rs6662272 | XP_032397 | D | H | DH | possibly damaging |
| rs6662276 | NP_689418 | A | T | AT | benign            |
| rs6662382 | XP_060945 | I | M | IM | benign            |
| rs6662450 | XP_373868 | V | L | VL | benign            |
| rs6662597 | XP_060945 | I | V | IV | benign            |
| rs6662744 | NP_002499 | T | I | TI | benign            |
| rs6663417 | NP_008965 | P | H | PH | probably damaging |
| rs6663523 | XP_496394 | D | Y | DY | probably damaging |
| rs6663799 | NP_689711 | A | S | AS | benign            |
| rs6664276 | XP_040527 | R | S | RS | benign            |
| rs6664332 | XP_372822 | S | N | SN | benign            |
| rs6664593 | XP_060537 | Q | R | QR | benign            |
| rs6664730 | XP_375853 | S | L | SL | possibly damaging |
| rs6665021 | XP_375726 | L | P | LP | possibly damaging |
| rs6665210 | NP_003628 | R | Q | RQ | benign            |
| rs6665568 | NP_000072 | Q | H | QH | possibly damaging |
| rs6665583 | XP_375688 | L | P | LP | benign            |
| rs6665583 | XP_290949 | L | P | LP | benign            |
| rs6665926 | NP_006358 | G | C | GC | possibly damaging |
| rs6665933 | NP_006358 | S | I | SI | possibly damaging |
| rs6665936 | NP_006358 | G | C | GC | benign            |
| rs6665937 | NP_006358 | D | Y | DY | possibly damaging |
| rs6665944 | NP_006358 | A | S | AS | benign            |
| rs6665989 | XP_375746 | E | A | EA | benign            |
| rs6666048 | XP_372824 | I | T | IT | benign            |
| rs6666097 | XP_373868 | A | T | AT | benign            |
| rs6666178 | NP_899228 | R | L | RL | possibly damaging |
| rs6666585 | XP_291548 | P | S | PS | possibly damaging |
| rs6666652 | NP_000341 | S | I | SI | benign            |
| rs6667171 | XP_060305 | R | L | RL | probably damaging |
| rs6667260 | NP_002212 | S | A | SA | benign            |
| rs6667718 | NP_919424 | S | N | SN | benign            |
| rs6667720 | XP_209234 | R | W | RW | probably damaging |
| rs6668293 | XP_497652 | V | A | VA | benign            |
| rs6668765 | NP_067649 | A | S | AS | benign            |
| rs6668826 | XP_043739 | R | H | RH | benign            |
| rs6668968 | NP_536354 | R | Q | RQ | benign            |
| rs6669070 | XP_496347 | W | R | WR | probably damaging |
| rs6669367 | NP_057532 | V | A | VA | benign            |
| rs6669585 | XP_371354 | T | M | TM | benign            |

|           |           |   |   |    |                   |
|-----------|-----------|---|---|----|-------------------|
| rs6669627 | XP_371227 | R | P | RP | possibly damaging |
| rs6670599 | XP_496357 | R | Q | RQ | benign            |
| rs6670759 | NP_003680 | V | M | VM | benign            |
| rs6670984 | NP_653299 | S | P | SP | benign            |
| rs6671088 | XP_496357 | G | E | GE | benign            |
| rs6671297 | XP_496446 | R | P | RP | benign            |
| rs6671324 | XP_496394 | E | Q | EQ | benign            |
| rs6671335 | XP_496394 | A | P | AP | benign            |
| rs6671551 | XP_378185 | S | N | SN | benign            |
| rs6672356 | NP_689699 | R | W | RW | possibly damaging |
| rs6673154 | XP_375746 | E | K | EK | possibly damaging |
| rs6673384 | XP_042500 | K | M | KM | possibly damaging |
| rs6673641 | NP_009098 | P | S | PS | benign            |
| rs6673767 | XP_375688 | P | L | PL | probably damaging |
| rs6673767 | XP_290949 | P | L | PL | probably damaging |
| rs6674407 | XP_375685 | R | W | RW | possibly damaging |
| rs6674599 | NP_982284 | P | R | PR | possibly damaging |
| rs6674773 | NP_006463 | R | Q | RQ | benign            |
| rs6675215 | NP_899228 | C | R | CR | benign            |
| rs6675281 | NP_061132 | L | F | LF | benign            |
| rs6675526 | NP_899228 | R | K | RK | benign            |
| rs6675529 | NP_859070 | A | T | AT | benign            |
| rs6675747 | NP_004485 | A | T | AT | benign            |
| rs6675871 | XP_371352 | S | N | SN | benign            |
| rs6676290 | NP_002624 | V | I | VI | benign            |
| rs6677543 | NP_000855 | I | L | IL | benign            |
| rs6677787 | NP_899632 | A | T | AT | benign            |
| rs6677787 | NP_004886 | A | T | AT | benign            |
| rs6677924 | NP_055227 | H | D | HD | probably damaging |
| rs6678040 | NP_612400 | T | A | TA | benign            |
| rs6678138 | XP_060305 | M | V | MV | benign            |
| rs6678405 | NP_113663 | Q | E | QE | benign            |
| rs6678540 | NP_689585 | M | T | MT | benign            |
| rs6678923 | XP_291607 | E | D | ED | benign            |
| rs6679056 | XP_291548 | E | G | EG | possibly damaging |
| rs6679078 | NP_000121 | K | R | KR | benign            |
| rs6679197 | XP_371227 | T | M | TM | benign            |
| rs6679793 | NP_112571 | H | Y | HY | benign            |
| rs6680969 | NP_543154 | R | H | RH | benign            |
| rs6681346 | NP_031383 | N | K | NK | benign            |
| rs6681516 | NP_060530 | T | S | TS | benign            |
| rs6681879 | NP_000341 | V | G | VG | probably damaging |
| rs6682039 | XP_372778 | Q | H | QH | possibly damaging |
| rs6682552 | NP_689823 | R | W | RW | probably damaging |
| rs6682823 | XP_378185 | R | Q | RQ | benign            |
| rs6683047 | XP_057040 | A | T | AT | benign            |



|           |           |   |   |    |                   |
|-----------|-----------|---|---|----|-------------------|
| rs6684514 | NP_115699 | V | M | VM | possibly damaging |
| rs6684619 | XP_371227 | D | N | DN | benign            |
| rs6684974 | NP_000853 | G | S | GS | benign            |
| rs6685323 | NP_536354 | H | Y | HY | benign            |
| rs6685961 | NP_057062 | L | S | LS | benign            |
| rs6686209 | NP_937792 | R | M | RM | benign            |
| rs6688201 | XP_086604 | L | V | LV | benign            |
| rs6688832 | NP_004276 | R | Q | RQ | benign            |
| rs6689014 | NP_848509 | G | R | GR | probably damaging |
| rs6689281 | XP_372838 | D | G | DG | benign            |
| rs6689850 | NP_689823 | V | A | VA | benign            |
| rs6690497 | NP_697021 | E | D | ED | benign            |
| rs6690497 | NP_006057 | E | D | ED | benign            |
| rs6690992 | NP_840059 | T | M | TM | benign            |
| rs6691117 | NP_000564 | I | V | IV | benign            |
| rs6691117 | NP_000642 | V | I | VI | benign            |
| rs6691220 | NP_443171 | V | M | VM | benign            |
| rs6691379 | NP_149033 | A | T | AT | benign            |
| rs6691379 | NP_036222 | A | T | AT | benign            |
| rs6691547 | NP_115640 | E | K | EK | benign            |
| rs6691840 | NP_000822 | S | A | SA | benign            |
| rs6692219 | NP_055625 | R | T | RT | possibly damaging |
| rs6692357 | XP_291439 | A | V | AV | benign            |
| rs6692357 | XP_372826 | V | A | VA | benign            |
| rs6692949 | XP_060945 | K | N | KN | benign            |
| rs6693235 | XP_497702 | K | R | KR | probably damaging |
| rs6693243 | XP_497702 | N | Y | NY | probably damaging |
| rs6693255 | XP_371257 | T | I | TI | benign            |
| rs6693391 | NP_078930 | A | S | AS | benign            |
| rs6693400 | NP_078930 | R | W | RW | possibly damaging |
| rs6693648 | XP_498811 | K | R | KR | benign            |
| rs6693815 | NP_078802 | G | S | GS | benign            |
| rs6693815 | NP_573444 | G | S | GS | benign            |
| rs6693815 | NP_620641 | G | S | GS | benign            |
| rs6694078 | XP_040527 | M | V | MV | benign            |
| rs6695033 | NP_733844 | T | A | TA | benign            |
| rs6695216 | NP_775909 | P | Q | PQ | probably damaging |
| rs6695302 | XP_060580 | V | M | VM | benign            |
| rs6695357 | XP_291439 | R | W | RW | probably damaging |
| rs6695686 | NP_001843 | T | M | TM | benign            |
| rs6695690 | NP_078798 | S | N | SN | benign            |
| rs6695710 | NP_060595 | R | W | RW | possibly damaging |
| rs6695830 | NP_057274 | Q | H | QH | benign            |
| rs6695966 | NP_663320 | E | G | EG | possibly damaging |
| rs6696162 | NP_563578 | T | I | TI | benign            |
| rs6696162 | NP_563579 | T | I | TI | benign            |

|           |           |   |   |    |                   |
|-----------|-----------|---|---|----|-------------------|
| rs6696162 | NP_002829 | T | I | TI | benign            |
| rs6696455 | XP_040527 | W | R | WR | benign            |
| rs6697153 | XP_372778 | E | V | EV | probably damaging |
| rs6697322 | XP_496691 | L | Q | LQ | probably damaging |
| rs6697472 | NP_932340 | A | T | AT | benign            |
| rs6697521 | XP_496354 | S | A | SA | benign            |
| rs6697793 | XP_086604 | R | C | RC | benign            |
| rs6697812 | XP_372824 | V | F | VF | benign            |
| rs6697938 | NP_777283 | Q | P | QP | benign            |
| rs6697938 | NP_036225 | Q | P | QP | benign            |
| rs6698023 | NP_001928 | V | I | VI | benign            |
| rs6698109 | NP_060143 | R | H | RH | benign            |
| rs6698159 | NP_006393 | P | L | PL | benign            |
| rs6698998 | NP_005415 | R | C | RC | possibly damaging |
| rs6699881 | XP_209234 | W | R | WR | possibly damaging |
| rs6700245 | NP_689585 | R | Q | RQ | benign            |
| rs6700677 | NP_071751 | G | R | GR | probably damaging |
| rs6700727 | XP_375688 | A | T | AT | benign            |
| rs6700727 | XP_290949 | A | T | AT | benign            |
| rs6700731 | XP_375688 | D | N | DN | benign            |
| rs6700731 | XP_290949 | D | N | DN | benign            |
| rs6702263 | NP_073611 | H | L | HL | probably damaging |
| rs6702407 | NP_065156 | P | L | PL | possibly damaging |
| rs6702407 | NP_851607 | P | L | PL | probably damaging |
| rs6702447 | XP_291395 | Q | H | QH | benign            |
| rs6702693 | NP_932340 | L | V | LV | benign            |
| rs6702823 | NP_689822 | S | L | SL | benign            |
| rs6704203 | XP_371263 | K | Q | KQ | possibly damaging |
| rs6704321 | NP_000528 | A | P | AP | benign            |
| rs6704505 | NP_775804 | K | E | KE | benign            |
| rs6706460 | NP_055297 | L | V | LV | benign            |
| rs6707568 | NP_079137 | P | L | PL | probably damaging |
| rs6707930 | NP_062564 | Q | K | QK | benign            |
| rs6708120 | XP_059482 | H | R | HR | possibly damaging |
| rs6708527 | NP_061720 | R | H | RH | possibly damaging |
| rs6709000 | NP_078859 | C | G | CG | probably damaging |
| rs6709148 | XP_092342 | R | G | RG | possibly damaging |
| rs6709303 | NP_056505 | Q | P | QP | benign            |
| rs6709619 | NP_055963 | Q | R | QR | benign            |
| rs6710142 | NP_078777 | A | T | AT | benign            |
| rs6710480 | NP_775491 | R | S | RS | benign            |
| rs6710817 | NP_056993 | A | T | AT | benign            |
| rs6711032 | XP_372911 | H | Q | HQ | benign            |
| rs6711382 | NP_004534 | H | Y | HY | possibly damaging |
| rs6712645 | NP_999626 | L | P | LP | possibly damaging |
| rs6713137 | NP_115895 | F | L | FL | benign            |

|           |           |   |   |    |                   |
|-----------|-----------|---|---|----|-------------------|
| rs6713162 | NP_004534 | S | P | SP | probably damaging |
| rs6714619 | XP_210411 | G | A | GA | benign            |
| rs6715286 | NP_115993 | D | E | DE | benign            |
| rs6715286 | NP_690609 | D | E | DE | benign            |
| rs6715951 | NP_849143 | I | F | IF | possibly damaging |
| rs6716066 | NP_689598 | I | V | IV | benign            |
| rs6716400 | NP_078859 | V | A | VA | possibly damaging |
| rs6716834 | NP_004516 | S | N | SN | benign            |
| rs6716965 | XP_497863 | E | K | EK | possibly damaging |
| rs6717362 | NP_002072 | M | T | MT | benign            |
| rs6718487 | XP_497899 | A | D | AD | possibly damaging |
| rs6719500 | NP_061720 | K | E | KE | benign            |
| rs6720173 | NP_071881 | Q | E | QE | benign            |
| rs6721345 | XP_059482 | R | Q | RQ | benign            |
| rs6722682 | NP_003194 | T | A | TA | benign            |
| rs6722745 | XP_497863 | M | T | MT | benign            |
| rs6723697 | XP_056455 | R | Q | RQ | benign            |
| rs6723823 | NP_006046 | V | E | VE | possibly damaging |
| rs6724198 | NP_004248 | A | T | AT | benign            |
| rs6724344 | XP_376154 | P | L | PL | possibly damaging |
| rs6724579 | XP_372941 | F | V | FV | possibly damaging |
| rs6725443 | NP_149055 | S | G | SG | benign            |
| rs6726491 | NP_002971 | D | N | DN | benign            |
| rs6727226 | NP_055963 | V | M | VM | benign            |
| rs6728999 | NP_002017 | R | Q | RQ | benign            |
| rs6728999 | NP_997639 | R | Q | RQ | benign            |
| rs6728999 | NP_997640 | R | Q | RQ | benign            |
| rs6728999 | NP_997641 | R | Q | RQ | benign            |
| rs6728999 | NP_997643 | R | Q | RQ | benign            |
| rs6728999 | NP_997647 | R | Q | RQ | benign            |
| rs6729801 | NP_061854 | D | N | DN | benign            |
| rs6730396 | NP_954702 | C | R | CR | probably damaging |
| rs6731704 | NP_659429 | I | M | IM | benign            |
| rs6731822 | NP_689728 | V | I | VI | benign            |
| rs6733578 | XP_496603 | Y | C | YC | probably damaging |
| rs6733774 | XP_291019 | E | K | EK | benign            |
| rs6733841 | NP_079352 | C | G | CG | probably damaging |
| rs6733871 | NP_849161 | S | N | SN | benign            |
| rs6734114 | NP_054859 | I | F | IF | benign            |
| rs6735208 | NP_004534 | N | K | NK | benign            |
| rs6735666 | NP_004062 | N | D | ND | benign            |
| rs6735958 | NP_073153 | G | D | GD | possibly damaging |
| rs6736017 | NP_000858 | M | V | MV | benign            |
| rs6736609 | NP_620482 | V | I | VI | benign            |
| rs6736670 | NP_003639 | F | L | FL | possibly damaging |
| rs6736670 | NP_690618 | F | L | FL | possibly damaging |

|           |           |   |   |    |                   |
|-----------|-----------|---|---|----|-------------------|
| rs6736913 | NP_061936 | E | K | EK | benign            |
| rs6737124 | NP_065960 | A | V | AV | benign            |
| rs6737478 | XP_371476 | R | G | RG | possibly damaging |
| rs6737993 | XP_497905 | S | G | SG | benign            |
| rs6738031 | NP_002967 | I | M | IM | benign            |
| rs6739001 | NP_000070 | D | V | DV | benign            |
| rs6740879 | NP_659415 | R | K | RK | benign            |
| rs6741084 | NP_006217 | W | C | WC | probably damaging |
| rs6741626 | XP_496597 | R | G | RG | probably damaging |
| rs6741892 | NP_620156 | N | Y | NY | benign            |
| rs6742404 | NP_036232 | I | V | IV | benign            |
| rs6742946 | NP_003194 | Q | E | QE | benign            |
| rs6743376 | NP_775184 | A | D | AD | benign            |
| rs6743719 | XP_371494 | A | V | AV | benign            |
| rs6744055 | XP_210411 | A | V | AV | benign            |
| rs6744817 | NP_055483 | V | M | VM | benign            |
| rs6744817 | NP_683701 | V | M | VM | benign            |
| rs6744817 | NP_149081 | V | M | VM | benign            |
| rs6744926 | NP_079492 | I | V | IV | benign            |
| rs6745497 | NP_872342 | S | N | SN | benign            |
| rs6746030 | NP_002968 | R | W | RW | probably damaging |
| rs6748148 | NP_714923 | Q | H | QH | benign            |
| rs6748672 | NP_115990 | L | R | LR | benign            |
| rs6748684 | NP_057431 | Y | H | YH | possibly damaging |
| rs6749066 | NP_114034 | E | G | EG | possibly damaging |
| rs6749066 | NP_002365 | E | G | EG | possibly damaging |
| rs6750289 | NP_006830 | S | P | SP | probably damaging |
| rs6751083 | NP_057047 | Y | N | YN | probably damaging |
| rs6751706 | NP_078859 | L | I | LI | benign            |
| rs6751827 | XP_496601 | R | H | RH | possibly damaging |
| rs6752026 | NP_000375 | P | S | PS | possibly damaging |
| rs6753459 | NP_115697 | I | T | IT | benign            |
| rs6753929 | XP_371486 | V | L | VL | benign            |
| rs6754398 | NP_076990 | R | M | RM | benign            |
| rs6755527 | XP_498895 | S | P | SP | benign            |
| rs6755571 | NP_009051 | P | T | PT | benign            |
| rs6756629 | NP_071881 | R | C | RC | probably damaging |
| rs6757519 | NP_997404 | E | Q | EQ | benign            |
| rs6757705 | NP_997404 | S | C | SC | possibly damaging |
| rs6757850 | NP_150375 | G | A | GA | benign            |
| rs6758025 | NP_598407 | T | M | TM | benign            |
| rs6758025 | NP_057737 | T | M | TM | benign            |
| rs6758480 | NP_006627 | E | K | EK | benign            |
| rs6758492 | NP_006627 | A | T | AT | benign            |
| rs6758815 | XP_291015 | L | I | LI | benign            |
| rs6759356 | NP_055383 | Q | H | QH | benign            |

|           |           |   |   |    |                   |
|-----------|-----------|---|---|----|-------------------|
| rs6759854 | NP_110395 | S | T | ST | benign            |
| rs6759892 | NP_001063 | S | A | SA | benign            |
| rs6760593 | NP_002967 | A | V | AV | benign            |
| rs6760811 | NP_997195 | I | N | IN | benign            |
| rs6760929 | NP_997195 | F | C | FC | probably damaging |
| rs6761276 | NP_775184 | I | T | IT | benign            |
| rs6761379 | NP_001866 | T | A | TA | benign            |
| rs6761637 | NP_006761 | F | S | FS | benign            |
| rs6761641 | NP_055963 | F | C | FC | benign            |
| rs6761729 | XP_372941 | P | A | PA | possibly damaging |
| rs6763816 | NP_003801 | V | I | VI | benign            |
| rs6764043 | XP_372991 | M | V | MV | benign            |
| rs6764714 | NP_714919 | Q | E | QE | benign            |
| rs6765537 | NP_115513 | I | V | IV | benign            |
| rs6766212 | NP_002213 | S | I | SI | probably damaging |
| rs6766410 | NP_570126 | N | K | NK | possibly damaging |
| rs6767237 | NP_115707 | K | E | KE | benign            |
| rs6767658 | XP_496652 | T | A | TA | benign            |
| rs6768523 | XP_210562 | T | A | TA | benign            |
| rs6770105 | XP_291062 | V | G | VG | possibly damaging |
| rs6770319 | NP_071432 | L | V | LV | benign            |
| rs6771386 | NP_001780 | R | W | RW | benign            |
| rs6772054 | NP_006061 | T | P | TP | benign            |
| rs6772467 | NP_114119 | G | R | GR | possibly damaging |
| rs6773138 | NP_078904 | K | R | KR | benign            |
| rs6774192 | NP_077817 | N | D | ND | benign            |
| rs6776150 | XP_497929 | P | L | PL | probably damaging |
| rs6776576 | NP_115545 | V | L | VL | benign            |
| rs6777426 | NP_066278 | T | S | TS | benign            |
| rs6777766 | NP_065941 | R | T | RT | possibly damaging |
| rs6777976 | NP_612390 | R | C | RC | probably damaging |
| rs6778728 | NP_065851 | T | S | TS | benign            |
| rs6779254 | NP_009003 | I | T | IT | benign            |
| rs6779520 | NP_001287 | L | V | LV | benign            |
| rs6779903 | NP_002709 | A | S | AS | benign            |
| rs6780013 | NP_056281 | A | T | AT | benign            |
| rs6780543 | NP_113646 | T | A | TA | benign            |
| rs6780995 | NP_060033 | M | T | MT | benign            |
| rs6781558 | XP_293581 | R | Q | RQ | benign            |
| rs6781844 | XP_210562 | Q | K | QK | benign            |
| rs6782766 | XP_376254 | G | E | GE | possibly damaging |
| rs6782980 | NP_005668 | S | G | SG | benign            |
| rs6782980 | NP_536799 | S | G | SG | benign            |
| rs6782980 | NP_536800 | S | G | SG | benign            |
| rs6782980 | NP_536802 | S | G | SG | benign            |
| rs6784095 | NP_065868 | E | D | ED | benign            |

|           |           |   |   |    |                   |
|-----------|-----------|---|---|----|-------------------|
| rs6784362 | NP_778226 | I | F | IF | benign            |
| rs6784389 | NP_778226 | N | S | NS | benign            |
| rs6785067 | NP_055190 | G | S | GS | benign            |
| rs6785339 | NP_612470 | P | Q | PQ | benign            |
| rs6785620 | NP_909119 | T | S | TS | benign            |
| rs6785620 | NP_057537 | T | S | TS | benign            |
| rs6786354 | XP_376254 | V | M | VM | benign            |
| rs6787209 | NP_006539 | T | P | TP | possibly damaging |
| rs6787281 | NP_036562 | Q | P | QP | possibly damaging |
| rs6787592 | NP_006539 | T | P | TP | possibly damaging |
| rs6787633 | NP_891550 | D | E | DE | benign            |
| rs6787916 | NP_995325 | E | D | ED | benign            |
| rs6788319 | NP_937795 | I | S | IS | benign            |
| rs6788448 | NP_115655 | I | M | IM | benign            |
| rs6789754 | NP_872343 | R | H | RH | benign            |
| rs6790129 | NP_115513 | L | V | LV | benign            |
| rs6790173 | NP_689830 | E | K | EK | benign            |
| rs6790768 | NP_997190 | R | G | RG | possibly damaging |
| rs6790837 | XP_087386 | F | S | FS | possibly damaging |
| rs6791037 | NP_066278 | S | G | SG | benign            |
| rs6791924 | NP_932173 | R | C | RC | possibly damaging |
| rs6791924 | NP_000326 | R | C | RC | possibly damaging |
| rs6795271 | NP_079199 | A | V | AV | benign            |
| rs6795497 | NP_001175 | A | S | AS | benign            |
| rs6795530 | NP_078789 | D | E | DE | benign            |
| rs6795815 | NP_872434 | P | L | PL | benign            |
| rs6795970 | NP_006505 | A | V | AV | benign            |
| rs6800728 | NP_056535 | D | V | DV | benign            |
| rs6800762 | NP_055594 | T | S | TS | benign            |
| rs6802937 | NP_996898 | S | P | SP | benign            |
| rs6803501 | NP_006398 | L | F | LF | benign            |
| rs6804162 | NP_005450 | M | V | MV | benign            |
| rs6804746 | NP_000657 | R | C | RC | probably damaging |
| rs6804951 | NP_055893 | T | A | TA | benign            |
| rs6805248 | NP_919269 | Q | R | QR | benign            |
| rs6805421 | NP_689606 | N | S | NS | benign            |
| rs6806770 | NP_997370 | T | I | TI | benign            |
| rs6807273 | XP_373001 | T | I | TI | benign            |
| rs6807362 | NP_570126 | G | A | GA | benign            |
| rs6807963 | NP_005326 | A | T | AT | benign            |
| rs6808056 | NP_055276 | F | S | FS | benign            |
| rs6808605 | NP_004523 | G | E | GE | benign            |
| rs6808605 | NP_612154 | G | E | GE | benign            |
| rs6809436 | NP_065705 | K | Q | KQ | benign            |
| rs6810039 | XP_171054 | E | D | ED | benign            |
| rs6810394 | NP_733828 | E | K | EK | benign            |

|           |              |   |   |    |                   |
|-----------|--------------|---|---|----|-------------------|
| rs6811370 | NP_938022    | A | V | AV | benign            |
| rs6811423 | NP_775931    | Q | R | QR | benign            |
| rs6811863 | NP_006598    | P | R | PR | probably damaging |
| rs6812252 | NP_758454    | R | W | RW | probably damaging |
| rs6813092 | NP_002083    | P | S | PS | benign            |
| rs6813102 | NP_996672    | P | L | PL | benign            |
| rs6814713 | XP_291095    | R | H | RH | benign            |
| rs6815155 | XP_371717    | D | N | DN | benign            |
| rs6815360 | XP_371717    | V | L | VL | benign            |
| rs6816604 | NP_065828    | S | P | SP | benign            |
| rs6817280 | NP_598375    | P | S | PS | probably damaging |
| rs6818265 | XP_496727    | L | V | LV | benign            |
| rs6818498 | XP_496692    | T | K | TK | benign            |
| rs6820230 | NP_001001290 | A | T | AT | benign            |
| rs6824133 | NP_060109    | S | N | SN | benign            |
| rs6825562 | XP_039169    | V | A | VA | benign            |
| rs6825812 | NP_006443    | K | N | KN | possibly damaging |
| rs6826961 | NP_689504    | N | K | NK | benign            |
| rs6827370 | NP_689988    | Q | R | QR | benign            |
| rs6828134 | NP_036356    | Q | E | QE | benign            |
| rs6828191 | NP_444267    | H | D | HD | benign            |
| rs6829380 | NP_000018    | S | T | ST | benign            |
| rs6830030 | XP_497963    | L | S | LS | possibly damaging |
| rs6830772 | XP_371701    | Q | R | QR | possibly damaging |
| rs6831040 | NP_001192    | F | L | FL | benign            |
| rs6831280 | NP_000194    | A | T | AT | benign            |
| rs6831595 | NP_598375    | E | V | EV | benign            |
| rs6832638 | NP_002080    | M | L | ML | benign            |
| rs6832675 | NP_002083    | P | R | PR | probably damaging |
| rs6834237 | NP_443096    | T | M | TM | possibly damaging |
| rs6834385 | XP_496692    | Y | H | YH | benign            |
| rs6835769 | NP_996672    | A | V | AV | benign            |
| rs6835933 | NP_115689    | K | E | KE | benign            |
| rs6836335 | NP_036577    | R | G | RG | possibly damaging |
| rs6836994 | NP_009124    | L | M | LM | benign            |
| rs6838959 | NP_065926    | S | Y | SY | benign            |
| rs6838959 | NP_116252    | S | Y | SY | benign            |
| rs6838959 | NP_996672    | S | Y | SY | benign            |
| rs6840615 | NP_004325    | I | V | IV | benign            |
| rs6840796 | XP_094074    | Y | N | YN | benign            |
| rs6843141 | NP_060098    | M | V | MV | benign            |
| rs6843325 | NP_065186    | F | L | FL | benign            |
| rs6843900 | NP_444267    | I | R | IR | benign            |
| rs6844109 | NP_055637    | P | L | PL | probably damaging |
| rs6844611 | XP_496692    | K | E | KE | benign            |
| rs6845630 | NP_061859    | R | C | RC | probably damaging |

|           |           |   |   |    |                   |
|-----------|-----------|---|---|----|-------------------|
| rs6846627 | NP_004468 | V | I | VI | benign            |
| rs6847454 | XP_293656 | Q | L | QL | benign            |
| rs6848030 | NP_065926 | I | V | IV | benign            |
| rs6848030 | NP_116252 | I | V | IV | benign            |
| rs6848030 | NP_996672 | I | V | IV | benign            |
| rs6848868 | XP_371706 | I | T | IT | benign            |
| rs6852908 | NP_060772 | D | E | DE | benign            |
| rs6855526 | XP_376334 | M | I | MI | benign            |
| rs6855813 | NP_955352 | N | S | NS | benign            |
| rs6855837 | NP_004889 | L | I | LI | benign            |
| rs6856967 | NP_004555 | A | V | AV | benign            |
| rs6858328 | XP_052620 | R | C | RC | probably damaging |
| rs6858658 | NP_006230 | M | L | ML | benign            |
| rs6858712 | NP_060109 | S | L | SL | benign            |
| rs6858913 | NP_113683 | P | L | PL | benign            |
| rs6858913 | NP_113684 | P | L | PL | benign            |
| rs6858913 | NP_061728 | P | L | PL | benign            |
| rs6859235 | XP_047995 | I | T | IT | possibly damaging |
| rs6859950 | NP_075561 | I | T | IT | benign            |
| rs6860507 | XP_371777 | R | G | RG | benign            |
| rs6860508 | NP_065777 | P | S | PS | possibly damaging |
| rs6860590 | NP_115268 | F | Y | FY | benign            |
| rs6860590 | NP_061747 | F | Y | FY | benign            |
| rs6860609 | NP_115268 | V | A | VA | benign            |
| rs6860609 | NP_061747 | V | A | VA | benign            |
| rs6861622 | NP_057065 | T | S | TS | benign            |
| rs6861622 | NP_741960 | T | S | TS | benign            |
| rs6862252 | XP_114432 | T | N | TN | benign            |
| rs6862925 | XP_047995 | N | S | NS | benign            |
| rs6863012 | NP_065777 | K | R | KR | benign            |
| rs6864342 | NP_001875 | N | S | NS | benign            |
| rs6865472 | NP_057688 | T | A | TA | benign            |
| rs6865950 | NP_056280 | P | S | PS | benign            |
| rs6867105 | NP_005451 | E | G | EG | benign            |
| rs6867221 | NP_872400 | Y | C | YC | benign            |
| rs6867419 | NP_115956 | E | K | EK | benign            |
| rs6867460 | NP_115270 | G | S | GS | possibly damaging |
| rs6867460 | NP_061748 | G | S | GS | possibly damaging |
| rs6867856 | NP_942123 | A | P | AP | benign            |
| rs6870069 | XP_498018 | L | P | LP | possibly damaging |
| rs6870170 | NP_036466 | E | D | ED | benign            |
| rs6872614 | NP_001438 | Y | H | YH | benign            |
| rs6872851 | NP_940968 | S | T | ST | benign            |
| rs6873421 | NP_003053 | V | I | VI | benign            |
| rs6873763 | NP_114062 | I | M | IM | benign            |
| rs6873763 | NP_061734 | I | M | IM | benign            |



|           |           |   |   |    |                   |
|-----------|-----------|---|---|----|-------------------|
| rs6874468 | NP_003109 | P | S | PS | benign            |
| rs6874630 | NP_078853 | A | V | AV | benign            |
| rs6875787 | NP_064612 | T | S | TS | benign            |
| rs6875902 | NP_078853 | A | S | AS | benign            |
| rs6876207 | NP_114399 | S | C | SC | benign            |
| rs6876792 | NP_940969 | R | C | RC | possibly damaging |
| rs6877058 | NP_061721 | A | S | AS | benign            |
| rs6877058 | NP_114088 | A | S | AS | benign            |
| rs6877337 | NP_473368 | A | E | AE | possibly damaging |
| rs6878145 | NP_114398 | Q | R | QR | benign            |
| rs6878145 | NP_061738 | Q | R | QR | benign            |
| rs6878669 | NP_689761 | S | P | SP | benign            |
| rs6879091 | XP_498030 | F | L | FL | benign            |
| rs6879322 | NP_079434 | H | Q | HQ | possibly damaging |
| rs6880234 | NP_114040 | A | G | AG | possibly damaging |
| rs6880234 | NP_061733 | A | G | AG | possibly damaging |
| rs6880739 | XP_496785 | Y | F | YF | benign            |
| rs6881677 | NP_061734 | S | N | SN | benign            |
| rs6881677 | NP_114062 | S | N | SN | possibly damaging |
| rs6882138 | NP_114443 | P | L | PL | benign            |
| rs6882138 | NP_061741 | P | L | PL | possibly damaging |
| rs6883021 | NP_631938 | L | P | LP | possibly damaging |
| rs6883562 | XP_376372 | Q | H | QH | benign            |
| rs6884652 | NP_075561 | I | V | IV | benign            |
| rs6884950 | XP_380171 | P | T | PT | benign            |
| rs6884959 | XP_371778 | T | A | TA | benign            |
| rs6886336 | NP_060899 | M | V | MV | benign            |
| rs6887708 | NP_689838 | T | I | TI | possibly damaging |
| rs6888275 | XP_498012 | V | I | VI | benign            |
| rs6888348 | NP_004159 | F | Y | FY | benign            |
| rs6889154 | NP_114062 | P | Q | PQ | probably damaging |
| rs6889154 | NP_061734 | P | Q | PQ | probably damaging |
| rs6890689 | NP_006781 | Q | K | QK | benign            |
| rs6891442 | NP_115271 | S | A | SA | benign            |
| rs6891442 | NP_061749 | S | A | SA | benign            |
| rs6891496 | NP_061934 | F | S | FS | benign            |
| rs6892335 | NP_001438 | F | S | FS | benign            |
| rs6892971 | NP_113655 | S | L | SL | possibly damaging |
| rs6893297 | NP_055548 | A | E | AE | benign            |
| rs6895344 | XP_293923 | I | T | IT | benign            |
| rs6895902 | NP_055572 | S | N | SN | benign            |
| rs6896011 | NP_000056 | K | E | KE | benign            |
| rs6896558 | NP_001983 | S | R | SR | possibly damaging |
| rs6896808 | NP_942568 | R | C | RC | possibly damaging |
| rs6896808 | NP_055858 | R | C | RC | possibly damaging |
| rs6897179 | NP_689616 | H | N | HN | benign            |

|           |           |   |   |    |                   |
|-----------|-----------|---|---|----|-------------------|
| rs6897179 | NP_877950 | H | N | HN | benign            |
| rs6897513 | NP_079143 | N | H | NH | possibly damaging |
| rs6897513 | NP_653323 | N | H | NH | possibly damaging |
| rs6897932 | NP_002176 | T | I | TI | possibly damaging |
| rs6898012 | NP_002388 | N | D | ND | possibly damaging |
| rs6898087 | XP_498030 | E | D | ED | benign            |
| rs6900094 | NP_002812 | G | D | GD | possibly damaging |
| rs6900094 | NP_690622 | G | D | GD | possibly damaging |
| rs6900094 | NP_690621 | G | D | GD | possibly damaging |
| rs6900094 | NP_690620 | G | D | GD | possibly damaging |
| rs6900094 | NP_690619 | G | D | GD | possibly damaging |
| rs6901992 | NP_258261 | T | I | TI | benign            |
| rs6902389 | XP_498052 | M | T | MT | benign            |
| rs6902392 | XP_498052 | E | K | EK | benign            |
| rs6902566 | NP_005290 | R | H | RH | benign            |
| rs6903584 | NP_079494 | L | I | LI | benign            |
| rs6905054 | NP_056070 | E | D | ED | benign            |
| rs6905231 | NP_003278 | R | K | RK | benign            |
| rs6905654 | NP_005115 | P | L | PL | probably damaging |
| rs6906499 | NP_005115 | N | K | NK | benign            |
| rs6906577 | XP_498150 | N | D | ND | benign            |
| rs6907125 | NP_722581 | Q | R | QR | benign            |
| rs6908862 | XP_498152 | P | L | PL | probably damaging |
| rs6909298 | NP_115570 | G | S | GS | benign            |
| rs6909714 | NP_001714 | H | Y | HY | benign            |
| rs6910062 | XP_293984 | A | T | AT | benign            |
| rs6910140 | NP_001842 | M | V | MV | benign            |
| rs6910140 | NP_511040 | M | V | MV | probably damaging |
| rs6910390 | NP_061978 | T | I | TI | benign            |
| rs6910541 | XP_048070 | V | I | VI | benign            |
| rs6911096 | NP_149062 | S | T | ST | benign            |
| rs6911096 | NP_892006 | T | S | TS | benign            |
| rs6911245 | NP_277037 | T | A | TA | benign            |
| rs6911245 | NP_060885 | T | A | TA | benign            |
| rs6911245 | NP_277036 | T | A | TA | benign            |
| rs6911720 | NP_612466 | T | A | TA | benign            |
| rs6911885 | NP_115507 | E | K | EK | benign            |
| rs6912568 | NP_002215 | Y | S | YS | probably damaging |
| rs6913689 | NP_116183 | S | T | ST | benign            |
| rs6913689 | NP_079533 | S | T | ST | benign            |
| rs6914331 | XP_498108 | H | Y | HY | possibly damaging |
| rs6915800 | NP_116183 | R | C | RC | probably damaging |
| rs6915800 | NP_079533 | R | C | RC | probably damaging |
| rs6917033 | NP_056070 | A | T | AT | benign            |
| rs6918004 | NP_006819 | E | K | EK | benign            |
| rs6919726 | NP_060240 | V | M | VM | benign            |

|           |              |   |   |    |                   |
|-----------|--------------|---|---|----|-------------------|
| rs6919807 | NP_056160    | R | H | RH | benign            |
| rs6919947 | NP_861447    | A | S | AS | benign            |
| rs6920105 | NP_000583    | E | D | ED | benign            |
| rs6920105 | NP_001002029 | E | D | ED | benign            |
| rs6920695 | NP_061978    | K | Q | KQ | benign            |
| rs6921269 | NP_000358    | Q | H | QH | benign            |
| rs6922302 | NP_665916    | A | P | AP | benign            |
| rs6922986 | NP_874360    | Q | H | QH | possibly damaging |
| rs6923492 | NP_000829    | P | S | PS | benign            |
| rs6923761 | NP_002053    | G | S | GS | benign            |
| rs6924078 | XP_371797    | I | V | IV | benign            |
| rs6924628 | NP_001494    | G | S | GS | possibly damaging |
| rs6925151 | NP_631904    | R | H | RH | benign            |
| rs6925344 | NP_059117    | S | G | SG | possibly damaging |
| rs6926101 | NP_439896    | V | I | VI | benign            |
| rs6926224 | XP_373419    | H | Y | HY | possibly damaging |
| rs6926570 | NP_067547    | I | V | IV | benign            |
| rs6926628 | NP_006111    | G | A | GA | possibly damaging |
| rs6926723 | XP_373419    | G | R | GR | benign            |
| rs6926857 | NP_612200    | T | A | TA | benign            |
| rs6926944 | XP_496798    | H | R | HR | possibly damaging |
| rs6926980 | XP_166451    | V | M | VM | benign            |
| rs6927567 | XP_496824    | R | H | RH | benign            |
| rs6927569 | XP_168053    | I | T | IT | benign            |
| rs6927685 | NP_631904    | V | G | VG | possibly damaging |
| rs6929069 | NP_004406    | R | Q | RQ | benign            |
| rs6929137 | NP_079335    | V | I | VI | benign            |
| rs6929334 | XP_498109    | P | L | PL | probably damaging |
| rs6929350 | XP_498109    | R | W | RW | possibly damaging |
| rs6930033 | NP_110503    | L | W | LW | benign            |
| rs6930932 | NP_056060    | A | D | AD | benign            |
| rs6933573 | NP_005065    | S | N | SN | benign            |
| rs6934360 | NP_060379    | R | H | RH | benign            |
| rs6934505 | NP_932347    | R | Q | RQ | benign            |
| rs6934603 | NP_940970    | F | L | FL | benign            |
| rs6934613 | NP_002627    | T | S | TS | benign            |
| rs6934613 | NP_077084    | T | S | TS | benign            |
| rs6935293 | NP_001362    | N | S | NS | benign            |
| rs6936639 | NP_114155    | L | P | LP | possibly damaging |
| rs6938102 | XP_498140    | N | S | NS | benign            |
| rs6938396 | XP_376464    | V | L | VL | benign            |
| rs6938667 | NP_872358    | V | M | VM | benign            |
| rs6938938 | NP_008989    | V | M | VM | benign            |
| rs6939591 | XP_291170    | T | S | TS | benign            |
| rs6940018 | NP_055554    | S | C | SC | benign            |
| rs6940875 | NP_060121    | Q | P | QP | benign            |

|           |           |   |   |    |                   |
|-----------|-----------|---|---|----|-------------------|
| rs6941356 | XP_048070 | N | S | NS | benign            |
| rs6941583 | NP_006493 | M | L | ML | benign            |
| rs6941704 | NP_115859 | R | H | RH | possibly damaging |
| rs6942245 | NP_008929 | A | V | AV | benign            |
| rs6942697 | XP_496854 | P | L | PL | probably damaging |
| rs6942882 | XP_496859 | I | V | IV | benign            |
| rs6943717 | NP_003218 | S | R | SR | benign            |
| rs6943851 | NP_037532 | A | S | AS | benign            |
| rs6943851 | NP_055189 | A | S | AS | benign            |
| rs6945306 | NP_113602 | Q | H | QH | possibly damaging |
| rs6945306 | NP_116562 | Q | H | QH | possibly damaging |
| rs6945354 | XP_376720 | D | A | DA | probably damaging |
| rs6946698 | NP_000080 | D | N | DN | benign            |
| rs6946812 | XP_168583 | D | N | DN | benign            |
| rs6947097 | NP_006083 | A | V | AV | benign            |
| rs6947660 | NP_064577 | K | E | KE | benign            |
| rs6947833 | NP_000594 | C | S | CS | probably damaging |
| rs6948380 | NP_543147 | S | P | SP | benign            |
| rs6948907 | NP_116570 | S | R | SR | benign            |
| rs6948907 | NP_116571 | S | R | SR | benign            |
| rs6948907 | NP_116572 | S | R | SR | benign            |
| rs6948907 | NP_127461 | S | R | SR | benign            |
| rs6948907 | NP_116569 | S | R | SR | benign            |
| rs6949082 | NP_036401 | A | S | AS | benign            |
| rs6949654 | XP_374625 | H | R | HR | benign            |
| rs6949738 | XP_376680 | P | H | PH | probably damaging |
| rs6950119 | XP_376680 | R | S | RS | benign            |
| rs6950836 | XP_379881 | S | F | SF | possibly damaging |
| rs6951123 | XP_379488 | R | W | RW | possibly damaging |
| rs6951159 | NP_067053 | T | A | TA | benign            |
| rs6951159 | NP_733751 | T | A | TA | benign            |
| rs6951485 | XP_373210 | S | N | SN | benign            |
| rs6952195 | XP_295195 | E | D | ED | benign            |
| rs6952324 | NP_619713 | E | D | ED | benign            |
| rs6952324 | NP_001698 | E | D | ED | benign            |
| rs6953000 | NP_689772 | V | M | VM | benign            |
| rs6953943 | XP_054313 | S | G | SG | benign            |
| rs6954345 | NP_000296 | S | C | SC | benign            |
| rs6955556 | XP_371954 | I | T | IT | benign            |
| rs6955671 | NP_683682 | G | R | GR | possibly damaging |
| rs6955671 | NP_110425 | R | G | RG | possibly damaging |
| rs6956198 | XP_498257 | S | P | SP | benign            |
| rs6956292 | XP_294370 | L | I | LI | possibly damaging |
| rs6956616 | NP_073587 | D | V | DV | probably damaging |
| rs6956789 | NP_853559 | T | A | TA | benign            |
| rs6957339 | NP_060454 | V | L | VL | benign            |

|           |           |   |   |    |                   |
|-----------|-----------|---|---|----|-------------------|
| rs6957510 | NP_853559 | R | Q | RQ | benign            |
| rs6957669 | XP_380044 | G | E | GE | possibly damaging |
| rs6957768 | NP_071903 | T | A | TA | benign            |
| rs6958498 | NP_005001 | P | A | PA | probably damaging |
| rs6960270 | NP_660335 | R | C | RC | probably damaging |
| rs6960328 | NP_060124 | I | S | IS | possibly damaging |
| rs6960867 | NP_005742 | N | S | NS | possibly damaging |
| rs6960867 | NP_671714 | N | S | NS | possibly damaging |
| rs6960867 | NP_671700 | N | S | NS | possibly damaging |
| rs6960868 | XP_168578 | A | V | AV | benign            |
| rs6961012 | XP_376576 | S | T | ST | benign            |
| rs6961412 | NP_061167 | I | V | IV | benign            |
| rs6961822 | XP_069734 | Y | H | YH | benign            |
| rs6962156 | XP_069734 | G | S | GS | benign            |
| rs6962756 | NP_563616 | P | L | PL | benign            |
| rs6962993 | NP_857597 | N | D | ND | benign            |
| rs6963781 | NP_857597 | M | V | MV | benign            |
| rs6964029 | NP_002905 | V | I | VI | benign            |
| rs6964029 | NP_852136 | V | I | VI | benign            |
| rs6964535 | NP_064529 | K | R | KR | benign            |
| rs6964587 | NP_671695 | M | I | MI | benign            |
| rs6964587 | NP_005742 | M | I | MI | possibly damaging |
| rs6964587 | NP_671714 | M | I | MI | possibly damaging |
| rs6964587 | NP_671700 | M | I | MI | possibly damaging |
| rs6965052 | XP_088140 | D | V | DV | probably damaging |
| rs6965332 | NP_997219 | T | A | TA | benign            |
| rs6965694 | XP_496870 | G | R | GR | probably damaging |
| rs6967117 | NP_005223 | V | M | VM | benign            |
| rs6967330 | NP_689963 | C | Y | CY | benign            |
| rs6967385 | XP_371878 | Q | K | QK | benign            |
| rs6968037 | XP_294634 | D | V | DV | benign            |
| rs6968293 | XP_498195 | Q | P | QP | benign            |
| rs6969304 | XP_054313 | C | S | CS | benign            |
| rs6969691 | NP_060124 | I | T | IT | benign            |
| rs6970210 | NP_006765 | N | S | NS | benign            |
| rs6970227 | XP_376576 | P | S | PS | possibly damaging |
| rs6970350 | NP_060454 | E | K | EK | benign            |
| rs6970605 | NP_006765 | R | H | RH | possibly damaging |
| rs6970768 | XP_373219 | K | R | KR | benign            |
| rs6970916 | NP_000457 | S | R | SR | possibly damaging |
| rs6971091 | NP_115988 | E | K | EK | benign            |
| rs6972013 | XP_294634 | D | E | DE | benign            |
| rs6972158 | NP_997055 | Q | R | QR | benign            |
| rs6972461 | XP_291247 | I | T | IT | benign            |
| rs6975981 | NP_009119 | S | N | SN | benign            |
| rs6976756 | NP_002794 | R | G | RG | probably damaging |

|           |           |   |   |    |                   |
|-----------|-----------|---|---|----|-------------------|
| rs6976847 | NP_002132 | T | P | TP | possibly damaging |
| rs6977072 | NP_006294 | P | A | PA | benign            |
| rs6979487 | NP_065943 | A | T | AT | benign            |
| rs6980124 | NP_835226 | L | P | LP | probably damaging |
| rs6980476 | NP_057117 | N | K | NK | benign            |
| rs6980542 | XP_114618 | A | T | AT | benign            |
| rs6980553 | NP_006274 | I | T | IT | benign            |
| rs6980829 | NP_003808 | L | P | LP | possibly damaging |
| rs6982284 | NP_068547 | A | V | AV | benign            |
| rs6982874 | XP_372063 | R | H | RH | probably damaging |
| rs6985081 | NP_115754 | D | E | DE | benign            |
| rs6985234 | NP_958786 | V | A | VA | benign            |
| rs6985234 | NP_958785 | V | A | VA | benign            |
| rs6985234 | NP_958784 | V | A | VA | benign            |
| rs6985234 | NP_958783 | V | A | VA | benign            |
| rs6985234 | NP_958782 | V | A | VA | benign            |
| rs6985234 | NP_958781 | V | A | VA | benign            |
| rs6985234 | NP_958780 | V | A | VA | benign            |
| rs6985234 | NP_000436 | V | A | VA | benign            |
| rs6985914 | XP_114618 | P | H | PH | possibly damaging |
| rs6986845 | XP_376756 | R | S | RS | benign            |
| rs6987002 | XP_376756 | P | S | PS | possibly damaging |
| rs6987984 | XP_498284 | G | R | GR | benign            |
| rs6988591 | NP_478136 | N | S | NS | benign            |
| rs6990563 | NP_473369 | G | D | GD | possibly damaging |
| rs6990761 | NP_115613 | I | V | IV | benign            |
| rs6991366 | NP_001547 | L | M | LM | benign            |
| rs6993291 | NP_036463 | A | D | AD | possibly damaging |
| rs6993345 | XP_496962 | K | N | KN | benign            |
| rs6994975 | NP_542382 | A | S | AS | benign            |
| rs6995099 | NP_004297 | V | I | VI | benign            |
| rs6995412 | NP_004309 | R | M | RM | benign            |
| rs6998705 | XP_372035 | R | P | RP | probably damaging |
| rs6998760 | NP_149117 | A | S | AS | benign            |
| rs6999234 | NP_060494 | I | V | IV | benign            |
| rs7001647 | NP_068547 | N | S | NS | benign            |
| rs7001647 | NP_055080 | N | S | NS | benign            |
| rs7001647 | NP_068548 | N | S | NS | benign            |
| rs7001720 | XP_114618 | N | T | NT | benign            |
| rs7001774 | NP_689841 | L | F | LF | benign            |
| rs7001839 | XP_376756 | R | Q | RQ | benign            |
| rs7001845 | XP_376756 | A | S | AS | benign            |
| rs7001867 | XP_498284 | T | S | TS | benign            |
| rs7002002 | NP_958786 | A | V | AV | benign            |
| rs7002002 | NP_958785 | A | V | AV | benign            |
| rs7002002 | NP_958784 | A | V | AV | benign            |

|           |           |   |   |    |                   |
|-----------|-----------|---|---|----|-------------------|
| rs7002002 | NP_958783 | A | V | AV | benign            |
| rs7002002 | NP_958782 | A | V | AV | benign            |
| rs7002002 | NP_958781 | A | V | AV | benign            |
| rs7002002 | NP_958780 | A | V | AV | benign            |
| rs7002002 | NP_000436 | A | V | AV | benign            |
| rs7002131 | XP_376756 | M | I | MI | benign            |
| rs7002384 | NP_054831 | S | L | SL | benign            |
| rs7004867 | XP_291266 | R | Q | RQ | possibly damaging |
| rs7005578 | NP_079043 | T | A | TA | benign            |
| rs7005697 | XP_372063 | L | V | LV | benign            |
| rs7006422 | XP_376756 | G | D | GD | possibly damaging |
| rs7007084 | NP_055294 | M | T | MT | benign            |
| rs7008199 | NP_116166 | G | D | GD | benign            |
| rs7008562 | XP_498277 | N | S | NS | benign            |
| rs7009117 | NP_006188 | G | V | GV | probably damaging |
| rs7012390 | XP_372063 | V | D | VD | possibly damaging |
| rs7012758 | XP_376781 | I | T | IT | benign            |
| rs7014678 | NP_060494 | N | S | NS | benign            |
| rs7014851 | NP_005135 | T | A | TA | benign            |
| rs7014851 | NP_060881 | T | A | TA | benign            |
| rs7016250 | NP_689627 | S | A | SA | benign            |
| rs7016831 | NP_758954 | T | N | TN | benign            |
| rs7017776 | NP_060841 | N | S | NS | benign            |
| rs7018553 | XP_071099 | F | S | FS | probably damaging |
| rs7019339 | XP_497019 | V | I | VI | benign            |
| rs7019819 | NP_006406 | P | L | PL | probably damaging |
| rs7019819 | NP_847894 | P | L | PL | probably damaging |
| rs7019867 | XP_372092 | N | K | NK | benign            |
| rs7019867 | XP_497031 | N | K | NK | benign            |
| rs7020782 | NP_002572 | S | Y | SY | benign            |
| rs7020958 | NP_002151 | G | S | GS | benign            |
| rs7021366 | NP_003789 | E | Q | EQ | benign            |
| rs7021572 | NP_714918 | E | K | EK | benign            |
| rs7022785 | XP_088459 | V | A | VA | benign            |
| rs7023652 | NP_149078 | D | E | DE | benign            |
| rs7023954 | NP_002442 | V | I | VI | benign            |
| rs7024108 | NP_006050 | T | M | TM | benign            |
| rs7024916 | XP_372117 | S | R | SR | benign            |
| rs7025336 | NP_002188 | E | D | ED | benign            |
| rs7025559 | NP_060418 | D | E | DE | benign            |
| rs7025570 | XP_071093 | P | S | PS | benign            |
| rs7025570 | XP_373308 | P | S | PS | benign            |
| rs7025599 | NP_110394 | S | F | SF | possibly damaging |
| rs7026705 | XP_071096 | A | D | AD | benign            |
| rs7026851 | NP_055379 | N | D | ND | possibly damaging |
| rs7026851 | NP_835258 | N | D | ND | possibly damaging |

|           |           |   |   |    |                   |
|-----------|-----------|---|---|----|-------------------|
| rs7028124 | XP_498309 | S | R | SR | possibly damaging |
| rs7028288 | XP_291314 | E | D | ED | benign            |
| rs7028996 | XP_497048 | G | A | GA | benign            |
| rs7028998 | XP_372092 | K | N | KN | benign            |
| rs7028998 | XP_497031 | K | N | KN | benign            |
| rs7029707 | NP_060418 | K | E | KE | benign            |
| rs7029864 | XP_048462 | L | Q | LQ | possibly damaging |
| rs7030179 | NP_000161 | H | N | HN | possibly damaging |
| rs7030366 | XP_376888 | A | V | AV | benign            |
| rs7030820 | XP_071099 | T | M | TM | benign            |
| rs7030823 | NP_848631 | V | A | VA | benign            |
| rs7030899 | NP_536856 | S | A | SA | benign            |
| rs7031762 | XP_498307 | R | P | RP | probably damaging |
| rs7031810 | NP_997188 | I | V | IV | benign            |
| rs7031966 | NP_055722 | T | N | TN | benign            |
| rs7032134 | NP_000467 | G | R | GR | benign            |
| rs7033581 | XP_497061 | S | G | SG | possibly damaging |
| rs7035276 | NP_060208 | I | T | IT | benign            |
| rs7036014 | NP_060383 | S | F | SF | benign            |
| rs7036635 | NP_005445 | V | I | VI | benign            |
| rs7036849 | XP_497061 | C | R | CR | benign            |
| rs7037849 | NP_997192 | V | A | VA | benign            |
| rs7037864 | NP_068800 | D | G | DG | benign            |
| rs7038707 | XP_497051 | V | A | VA | benign            |
| rs7039287 | NP_671492 | C | Y | CY | probably damaging |
| rs7039287 | NP_009134 | C | Y | CY | probably damaging |
| rs7039409 | NP_671492 | R | Q | RQ | benign            |
| rs7039409 | NP_009134 | R | Q | RQ | benign            |
| rs7040763 | XP_372118 | R | P | RP | probably damaging |
| rs7040838 | NP_064530 | C | S | CS | benign            |
| rs7041513 | NP_689634 | R | K | RK | benign            |
| rs7041938 | XP_171207 | N | H | NH | benign            |
| rs7042337 | XP_088525 | I | M | IM | benign            |
| rs7042502 | XP_071093 | L | M | LM | benign            |
| rs7042502 | XP_373308 | L | M | LM | benign            |
| rs7042788 | NP_003854 | T | A | TA | benign            |
| rs7042996 | XP_372090 | V | G | VG | benign            |
| rs7043846 | NP_653254 | A | T | AT | benign            |
| rs7044352 | XP_372128 | Y | H | YH | benign            |
| rs7044405 | XP_373289 | H | R | HR | benign            |
| rs7044561 | XP_291314 | H | N | HN | possibly damaging |
| rs7045088 | NP_006257 | C | S | CS | probably damaging |
| rs7046603 | XP_373317 | W | R | WR | benign            |
| rs7047404 | XP_030729 | P | S | PS | possibly damaging |
| rs7047681 | NP_006634 | L | V | LV | benign            |
| rs7048652 | NP_060418 | A | S | AS | benign            |



|           |           |   |   |    |                   |
|-----------|-----------|---|---|----|-------------------|
| rs7049042 | XP_071099 | F | S | FS | probably damaging |
| rs7050077 | NP_543022 | N | S | NS | benign            |
| rs7050904 | XP_172801 | E | A | EA | benign            |
| rs7051260 | NP_065983 | E | D | ED | benign            |
| rs7053761 | XP_208423 | R | Q | RQ | possibly damaging |
| rs7056263 | XP_377062 | T | I | TI | benign            |
| rs7056365 | NP_787064 | S | I | SI | possibly damaging |
| rs7057232 | NP_061136 | N | D | ND | benign            |
| rs7058123 | NP_114100 | E | V | EV | probably damaging |
| rs7058353 | NP_006214 | S | R | SR | benign            |
| rs7059443 | XP_373351 | E | K | EK | benign            |
| rs7059508 | NP_056968 | Y | S | YS | possibly damaging |
| rs7059610 | XP_498374 | S | L | SL | benign            |
| rs7061150 | XP_291321 | T | I | TI | benign            |
| rs7061195 | XP_373373 | I | F | IF | benign            |
| rs7061500 | XP_293342 | G | D | GD | probably damaging |
| rs7062352 | NP_079460 | E | K | EK | benign            |
| rs7062640 | NP_803134 | R | C | RC | benign            |
| rs7063611 | XP_172801 | P | A | PA | possibly damaging |
| rs7063931 | XP_377014 | V | G | VG | probably damaging |
| rs7064613 | NP_079193 | S | R | SR | benign            |
| rs7065449 | NP_006141 | R | C | RC | possibly damaging |
| rs7065872 | NP_114422 | L | F | LF | benign            |
| rs7065978 | NP_001542 | T | I | TI | probably damaging |
| rs7066252 | NP_001930 | V | L | VL | benign            |
| rs7066649 | NP_005305 | F | I | FI | probably damaging |
| rs7066976 | XP_373351 | I | T | IT | probably damaging |
| rs7067496 | NP_004645 | E | D | ED | benign            |
| rs7067625 | NP_063946 | T | A | TA | benign            |
| rs7067816 | NP_073713 | R | L | RL | possibly damaging |
| rs7068431 | NP_068815 | S | P | SP | possibly damaging |
| rs7070135 | NP_003165 | V | L | VL | benign            |
| rs7070135 | NP_068506 | V | L | VL | benign            |
| rs7071400 | NP_055535 | G | E | GE | benign            |
| rs7071768 | NP_002408 | N | S | NS | benign            |
| rs7072484 | NP_060601 | C | R | CR | benign            |
| rs7072520 | XP_495824 | P | R | PR | probably damaging |
| rs7072606 | NP_775795 | P | S | PS | benign            |
| rs7072728 | XP_495843 | L | P | LP | possibly damaging |
| rs7073433 | NP_996744 | R | W | RW | probably damaging |
| rs7073610 | NP_060764 | P | L | PL | benign            |
| rs7074707 | NP_937781 | Y | C | YC | probably damaging |
| rs7074707 | NP_056305 | Y | C | YC | probably damaging |
| rs7074847 | NP_758442 | Q | R | QR | benign            |
| rs7074847 | NP_036575 | Q | R | QR | benign            |
| rs7075067 | NP_115939 | S | R | SR | possibly damaging |

|           |           |   |   |    |                   |
|-----------|-----------|---|---|----|-------------------|
| rs7075296 | NP_002207 | S | N | SN | benign            |
| rs7075840 | NP_997255 | H | R | HR | benign            |
| rs7078073 | NP_075261 | P | A | PA | benign            |
| rs7078073 | NP_075417 | P | A | PA | benign            |
| rs7078073 | NP_075420 | P | A | PA | benign            |
| rs7078073 | NP_075264 | P | A | PA | benign            |
| rs7078073 | NP_075418 | P | A | PA | possibly damaging |
| rs7078073 | NP_075258 | P | A | PA | possibly damaging |
| rs7078073 | NP_075259 | P | A | PA | possibly damaging |
| rs7078073 | NP_075262 | P | A | PA | possibly damaging |
| rs7078073 | NP_075263 | P | A | PA | possibly damaging |
| rs7078073 | NP_075419 | P | A | PA | possibly damaging |
| rs7078073 | NP_000132 | P | A | PA | possibly damaging |
| rs7079053 | NP_003864 | A | V | AV | benign            |
| rs7079388 | NP_542166 | N | S | NS | benign            |
| rs7079481 | NP_115967 | P | T | PT | probably damaging |
| rs7080536 | NP_004123 | G | E | GE | probably damaging |
| rs7080681 | NP_000383 | R | H | RH | benign            |
| rs7080916 | NP_060601 | A | T | AT | benign            |
| rs7081076 | NP_056200 | G | V | GV | probably damaging |
| rs7081659 | NP_776152 | P | H | PH | benign            |
| rs7081726 | NP_055271 | I | V | IV | benign            |
| rs7081726 | NP_663314 | I | V | IV | benign            |
| rs7083033 | NP_660355 | H | R | HR | possibly damaging |
| rs7083331 | NP_996742 | I | T | IT | benign            |
| rs7083331 | NP_996743 | I | T | IT | benign            |
| rs7083331 | NP_996744 | I | T | IT | benign            |
| rs7083331 | NP_008928 | I | T | IT | benign            |
| rs7083344 | NP_689799 | G | D | GD | benign            |
| rs7083418 | NP_009196 | E | K | EK | benign            |
| rs7083532 | NP_009196 | D | N | DN | benign            |
| rs7083622 | NP_002408 | T | N | TN | benign            |
| rs7083776 | NP_996744 | D | G | DG | benign            |
| rs7084118 | NP_004367 | V | G | VG | benign            |
| rs7084118 | NP_510870 | V | G | VG | possibly damaging |
| rs7084817 | NP_002207 | L | V | LV | benign            |
| rs7084877 | NP_004732 | P | R | PR | probably damaging |
| rs7086200 | NP_149091 | A | V | AV | benign            |
| rs7087107 | NP_689416 | M | I | MI | benign            |
| rs7087328 | XP_089747 | Q | H | QH | possibly damaging |
| rs7088165 | NP_003930 | V | I | VI | benign            |
| rs7088165 | NP_378663 | V | I | VI | benign            |
| rs7089948 | NP_005389 | A | S | AS | benign            |
| rs7089970 | XP_372331 | A | E | AE | benign            |
| rs7090059 | NP_056428 | P | Q | PQ | possibly damaging |
| rs7090248 | NP_997204 | K | R | KR | benign            |

|           |           |   |   |    |                   |
|-----------|-----------|---|---|----|-------------------|
| rs7091419 | NP_006711 | R | G | RG | benign            |
| rs7091419 | NP_002304 | R | G | RG | possibly damaging |
| rs7092117 | XP_495798 | K | E | KE | benign            |
| rs7092170 | NP_006552 | A | V | AV | benign            |
| rs7094973 | NP_065082 | A | T | AT | benign            |
| rs7095762 | NP_060487 | Q | K | QK | benign            |
| rs7097295 | XP_291723 | R | H | RH | benign            |
| rs7099177 | NP_004397 | R | L | RL | benign            |
| rs7099177 | NP_060049 | R | L | RL | possibly damaging |
| rs7099177 | NP_015568 | R | L | RL | possibly damaging |
| rs7099565 | NP_631908 | R | K | RK | benign            |
| rs7101891 | XP_495873 | V | L | VL | benign            |
| rs7101919 | XP_372359 | I | T | IT | possibly damaging |
| rs7102322 | NP_473373 | N | S | NS | benign            |
| rs7102464 | NP_112224 | E | K | EK | benign            |
| rs7102536 | XP_291980 | Y | C | YC | probably damaging |
| rs7102584 | NP_000881 | Q | E | QE | benign            |
| rs7102825 | XP_495863 | M | V | MV | benign            |
| rs7103026 | XP_166917 | K | E | KE | benign            |
| rs7103126 | NP_620123 | V | A | VA | benign            |
| rs7103820 | NP_955384 | G | R | GR | possibly damaging |
| rs7103994 | XP_497315 | E | Q | EQ | benign            |
| rs7104156 | NP_071504 | H | L | HL | probably damaging |
| rs7104156 | NP_000911 | H | L | HL | probably damaging |
| rs7104422 | NP_149023 | P | L | PL | probably damaging |
| rs7104979 | NP_848605 | P | L | PL | probably damaging |
| rs7105443 | XP_495863 | K | R | KR | benign            |
| rs7105528 | NP_001226 | A | P | AP | benign            |
| rs7105729 | NP_938016 | D | V | DV | probably damaging |
| rs7106300 | XP_372369 | P | L | PL | possibly damaging |
| rs7106330 | XP_372353 | V | L | VL | benign            |
| rs7106654 | NP_057307 | A | V | AV | possibly damaging |
| rs7106897 | XP_495885 | T | I | TI | benign            |
| rs7107077 | XP_372391 | L | I | LI | benign            |
| rs7107539 | XP_208543 | C | W | CW | benign            |
| rs7108205 | NP_878904 | A | G | AG | benign            |
| rs7108205 | NP_065693 | A | G | AG | benign            |
| rs7108225 | XP_061619 | M | T | MT | benign            |
| rs7108654 | XP_061619 | V | A | VA | benign            |
| rs7108757 | NP_112554 | A | T | AT | benign            |
| rs7108757 | NP_068743 | A | T | AT | benign            |
| rs7109028 | NP_003728 | P | L | PL | probably damaging |
| rs7109316 | NP_060543 | Y | S | YS | probably damaging |
| rs7109614 | XP_374927 | P | S | PS | probably damaging |
| rs7110221 | NP_005238 | Q | L | QL | probably damaging |
| rs7110736 | NP_110397 | F | L | FL | benign            |

|           |           |   |   |    |                   |
|-----------|-----------|---|---|----|-------------------|
| rs7110845 | NP_055167 | H | R | HR | possibly damaging |
| rs7111280 | NP_955361 | W | R | WR | probably damaging |
| rs7111428 | XP_084672 | I | M | IM | benign            |
| rs7111429 | XP_374927 | M | T | MT | possibly damaging |
| rs7111486 | NP_059509 | I | V | IV | benign            |
| rs7111528 | XP_291816 | T | M | TM | benign            |
| rs7111538 | NP_997257 | R | Q | RQ | possibly damaging |
| rs7111634 | XP_166831 | D | G | DG | possibly damaging |
| rs7111805 | NP_079047 | A | V | AV | benign            |
| rs7111912 | XP_495874 | E | G | EG | probably damaging |
| rs7112010 | XP_061674 | S | L | SL | possibly damaging |
| rs7112053 | NP_000042 | L | V | LV | benign            |
| rs7112649 | XP_495863 | L | V | LV | benign            |
| rs7112652 | NP_060964 | P | S | PS | possibly damaging |
| rs7112652 | NP_665894 | P | S | PS | possibly damaging |
| rs7112652 | NP_665893 | P | S | PS | possibly damaging |
| rs7112904 | NP_006380 | K | E | KE | benign            |
| rs7113015 | XP_372371 | P | L | PL | possibly damaging |
| rs7113308 | XP_062300 | F | L | FL | benign            |
| rs7114037 | XP_374898 | H | Q | HQ | benign            |
| rs7114415 | XP_166869 | S | T | ST | benign            |
| rs7114672 | XP_372371 | V | M | VM | possibly damaging |
| rs7114712 | NP_060327 | E | V | EV | possibly damaging |
| rs7114712 | NP_060746 | E | V | EV | possibly damaging |
| rs7116027 | XP_290536 | E | A | EA | possibly damaging |
| rs7116126 | NP_060017 | H | R | HR | probably damaging |
| rs7116130 | NP_787128 | W | R | WR | benign            |
| rs7116575 | XP_210186 | C | F | CF | benign            |
| rs7117260 | XP_061624 | L | R | LR | possibly damaging |
| rs7117340 | NP_065079 | N | S | NS | benign            |
| rs7117495 | NP_002171 | A | T | AT | benign            |
| rs7117511 | NP_000251 | D | N | DN | benign            |
| rs7118113 | NP_149419 | I | V | IV | benign            |
| rs7118695 | NP_714916 | T | P | TP | probably damaging |
| rs7118900 | NP_848605 | A | T | AT | benign            |
| rs7120079 | XP_166903 | F | L | FL | benign            |
| rs7120555 | NP_443200 | Q | H | QH | benign            |
| rs7120634 | NP_006770 | I | F | IF | benign            |
| rs7120743 | XP_372378 | G | E | GE | probably damaging |
| rs7121106 | NP_060631 | P | L | PL | possibly damaging |
| rs7121276 | XP_372403 | A | S | AS | benign            |
| rs7121880 | XP_166820 | H | D | HD | probably damaging |
| rs7122089 | NP_002171 | P | A | PA | probably damaging |
| rs7122277 | NP_058648 | K | R | KR | benign            |
| rs7122468 | NP_060310 | G | S | GS | possibly damaging |
| rs7122514 | XP_166820 | T | M | TM | benign            |

|           |           |   |   |    |                   |
|-----------|-----------|---|---|----|-------------------|
| rs7122644 | NP_003687 | A | V | AV | benign            |
| rs7123108 | XP_166831 | C | Y | CY | probably damaging |
| rs7123885 | NP_002680 | S | N | SN | benign            |
| rs7123948 | XP_290536 | A | V | AV | benign            |
| rs7124068 | NP_002412 | T | P | TP | benign            |
| rs7124407 | NP_542390 | R | T | RT | benign            |
| rs7124409 | NP_057404 | L | H | LH | possibly damaging |
| rs7124834 | NP_057404 | T | S | TS | benign            |
| rs7124834 | NP_624357 | T | S | TS | benign            |
| rs7124871 | XP_372386 | R | L | RL | benign            |
| rs7125451 | NP_066288 | A | T | AT | benign            |
| rs7125822 | NP_055176 | L | R | LR | possibly damaging |
| rs7125959 | NP_060960 | R | G | RG | benign            |
| rs7126079 | XP_372394 | P | L | PL | probably damaging |
| rs7126904 | NP_068813 | M | I | MI | benign            |
| rs7128017 | NP_852609 | L | M | LM | benign            |
| rs7128029 | NP_787128 | T | A | TA | benign            |
| rs7128044 | NP_787128 | Y | C | YC | benign            |
| rs7128652 | NP_004467 | N | S | NS | benign            |
| rs7128850 | XP_374922 | Q | K | QK | benign            |
| rs7129272 | NP_077019 | E | G | EG | possibly damaging |
| rs7129887 | NP_944605 | L | P | LP | possibly damaging |
| rs7130086 | XP_497275 | T | M | TM | possibly damaging |
| rs7130624 | XP_497281 | R | C | RC | possibly damaging |
| rs7130656 | NP_060859 | I | V | IV | benign            |
| rs7131283 | XP_495876 | N | Y | NY | possibly damaging |
| rs7132347 | XP_372459 | H | D | HD | possibly damaging |
| rs7132431 | XP_372459 | C | Y | CY | probably damaging |
| rs7132464 | XP_495908 | N | D | ND | benign            |
| rs7132600 | XP_372459 | T | I | TI | probably damaging |
| rs7132916 | XP_372459 | V | I | VI | benign            |
| rs7133444 | NP_112592 | D | N | DN | benign            |
| rs7133914 | XP_058513 | R | H | RH | benign            |
| rs7135018 | NP_795370 | K | E | KE | benign            |
| rs7135642 | NP_115523 | R | G | RG | benign            |
| rs7137123 | NP_066289 | P | S | PS | probably damaging |
| rs7137185 | NP_004438 | D | E | DE | benign            |
| rs7137719 | NP_387467 | V | E | VE | benign            |
| rs7138580 | XP_374987 | E | Q | EQ | benign            |
| rs7138767 | XP_033113 | A | T | AT | benign            |
| rs7140044 | NP_006428 | N | S | NS | benign            |
| rs7140561 | NP_005921 | V | A | VA | benign            |
| rs7140561 | NP_976230 | V | A | VA | benign            |
| rs7140914 | NP_060440 | C | F | CF | probably damaging |
| rs7141532 | XP_113763 | P | A | PA | possibly damaging |
| rs7142020 | NP_001827 | V | A | VA | probably damaging |

|           |           |   |   |    |                   |
|-----------|-----------|---|---|----|-------------------|
| rs7142228 | XP_375085 | S | P | SP | probably damaging |
| rs7143633 | XP_370737 | V | L | VL | benign            |
| rs7143758 | NP_872198 | E | D | ED | benign            |
| rs7143758 | NP_004746 | E | D | ED | benign            |
| rs7144523 | NP_031387 | R | Q | RQ | benign            |
| rs7144658 | NP_004487 | A | T | AT | benign            |
| rs7145583 | XP_029353 | F | S | FS | possibly damaging |
| rs7145814 | XP_372509 | I | V | IV | benign            |
| rs7146310 | NP_078934 | V | A | VA | benign            |
| rs7146672 | NP_002809 | H | P | HP | probably damaging |
| rs7147177 | NP_976046 | P | S | PS | benign            |
| rs7147300 | NP_000350 | D | N | DN | benign            |
| rs7147671 | NP_071356 | D | G | DG | benign            |
| rs7148147 | NP_689542 | R | W | RW | benign            |
| rs7149578 | XP_050278 | S | Y | SY | benign            |
| rs7149586 | NP_004545 | S | P | SP | benign            |
| rs7149769 | XP_050278 | P | R | PR | benign            |
| rs7150973 | XP_375087 | N | S | NS | benign            |
| rs7151995 | XP_377338 | W | L | WL | benign            |
| rs7153640 | NP_006862 | E | V | EV | possibly damaging |
| rs7154732 | NP_861535 | F | L | FL | benign            |
| rs7154732 | NP_853511 | F | L | FL | benign            |
| rs7155490 | XP_051699 | E | K | EK | benign            |
| rs7155504 | XP_170749 | Y | C | YC | probably damaging |
| rs7155812 | NP_851937 | N | S | NS | benign            |
| rs7156206 | NP_056161 | S | N | SN | benign            |
| rs7156590 | NP_113652 | R | Q | RQ | benign            |
| rs7157076 | XP_063308 | M | V | MV | benign            |
| rs7157156 | XP_050278 | A | V | AV | benign            |
| rs7157583 | NP_071337 | R | Q | RQ | benign            |
| rs7157599 | NP_996801 | S | N | SN | benign            |
| rs7157661 | NP_001093 | N | T | NT | benign            |
| rs7157977 | XP_113763 | A | T | AT | benign            |
| rs7158653 | NP_055175 | S | F | SF | possibly damaging |
| rs7160308 | XP_029353 | L | V | LV | benign            |
| rs7161563 | NP_004187 | Q | E | QE | benign            |
| rs7161680 | XP_063202 | D | N | DN | benign            |
| rs7161810 | XP_031744 | P | L | PL | probably damaging |
| rs7162168 | NP_009131 | M | T | MT | benign            |
| rs7162168 | NP_006729 | M | T | MT | benign            |
| rs7162473 | NP_003913 | D | E | DE | benign            |
| rs7162519 | NP_003913 | H | N | HN | possibly damaging |
| rs7163313 | NP_056347 | N | K | NK | possibly damaging |
| rs7165897 | NP_857593 | P | L | PL | benign            |
| rs7165897 | NP_003701 | P | L | PL | benign            |
| rs7166441 | XP_372589 | R | G | RG | benign            |

|           |           |   |   |    |                   |
|-----------|-----------|---|---|----|-------------------|
| rs7166994 | NP_054799 | D | E | DE | benign            |
| rs7167216 | NP_000048 | V | I | VI | benign            |
| rs7167318 | NP_078781 | K | E | KE | benign            |
| rs7167896 | XP_496026 | S | P | SP | benign            |
| rs7168025 | NP_078781 | R | G | RG | possibly damaging |
| rs7168069 | NP_036343 | R | L | RL | possibly damaging |
| rs7168775 | NP_699205 | S | F | SF | possibly damaging |
| rs7169142 | NP_733468 | L | S | LS | benign            |
| rs7169142 | NP_653091 | L | S | LS | benign            |
| rs7169262 | XP_031561 | P | S | PS | possibly damaging |
| rs7169362 | XP_497467 | T | A | TA | benign            |
| rs7169404 | XP_031561 | R | L | RL | probably damaging |
| rs7169420 | XP_497472 | V | L | VL | benign            |
| rs7170589 | NP_073752 | H | N | HN | possibly damaging |
| rs7170637 | NP_055423 | G | S | GS | benign            |
| rs7170898 | NP_056355 | R | G | RG | possibly damaging |
| rs7171194 | XP_372589 | M | T | MT | benign            |
| rs7172685 | NP_055767 | N | S | NS | benign            |
| rs7172758 | NP_955445 | E | A | EA | possibly damaging |
| rs7172758 | NP_955446 | E | A | EA | possibly damaging |
| rs7172758 | NP_003972 | E | A | EA | possibly damaging |
| rs7172804 | XP_496034 | T | A | TA | benign            |
| rs7173005 | XP_170777 | I | R | IR | possibly damaging |
| rs7173104 | NP_057726 | Q | H | QH | benign            |
| rs7173448 | NP_079516 | P | L | PL | possibly damaging |
| rs7173476 | NP_079516 | R | S | RS | possibly damaging |
| rs7173744 | XP_496045 | A | T | AT | benign            |
| rs7173826 | NP_078942 | L | I | LI | benign            |
| rs7174493 | NP_002866 | L | V | LV | benign            |
| rs7175005 | NP_004830 | R | H | RH | benign            |
| rs7175005 | NP_955362 | R | H | RH | benign            |
| rs7175332 | XP_496026 | T | M | TM | possibly damaging |
| rs7175654 | NP_000129 | P | A | PA | benign            |
| rs7175910 | NP_997400 | M | T | MT | probably damaging |
| rs7175979 | NP_777576 | E | Q | EQ | benign            |
| rs7176688 | XP_370893 | F | S | FS | probably damaging |
| rs7176831 | XP_496026 | L | P | LP | possibly damaging |
| rs7177092 | NP_004127 | T | I | TI | possibly damaging |
| rs7177107 | NP_009131 | E | K | EK | benign            |
| rs7177107 | NP_006729 | E | K | EK | benign            |
| rs7177192 | NP_733468 | R | T | RT | benign            |
| rs7177192 | NP_653091 | R | T | RT | benign            |
| rs7178160 | XP_091156 | G | V | GV | possibly damaging |
| rs7178181 | NP_570854 | S | F | SF | benign            |
| rs7178181 | NP_000453 | S | F | SF | benign            |
| rs7178181 | NP_570853 | S | F | SF | benign            |

|           |           |   |   |    |                   |
|-----------|-----------|---|---|----|-------------------|
| rs7178234 | NP_064597 | T | M | TM | benign            |
| rs7178634 | NP_060924 | T | A | TA | benign            |
| rs7178777 | NP_060924 | T | N | TN | benign            |
| rs7179073 | NP_997221 | T | M | TM | possibly damaging |
| rs7180279 | NP_937784 | Q | R | QR | benign            |
| rs7180330 | NP_997205 | A | S | AS | benign            |
| rs7180374 | XP_375150 | R | C | RC | probably damaging |
| rs7181742 | NP_937784 | F | S | FS | benign            |
| rs7181869 | XP_372576 | Q | H | QH | benign            |
| rs7182648 | NP_116255 | S | F | SF | benign            |
| rs7182723 | NP_076968 | Q | R | QR | benign            |
| rs7182782 | NP_003913 | G | R | GR | possibly damaging |
| rs7182971 | NP_055874 | V | I | VI | benign            |
| rs7183491 | NP_078884 | I | M | IM | benign            |
| rs7185231 | XP_377407 | P | L | PL | probably damaging |
| rs7185611 | XP_372611 | I | T | IT | possibly damaging |
| rs7185774 | NP_877417 | G | D | GD | possibly damaging |
| rs7185990 | NP_005877 | E | D | ED | benign            |
| rs7186361 | XP_496156 | Q | R | QR | benign            |
| rs7186504 | NP_005539 | P | Q | PQ | probably damaging |
| rs7187001 | NP_115909 | S | G | SG | benign            |
| rs7187073 | NP_005242 | Q | H | QH | benign            |
| rs7187227 | NP_004195 | G | S | GS | possibly damaging |
| rs7187246 | XP_058743 | L | P | LP | benign            |
| rs7187826 | NP_775186 | L | P | LP | possibly damaging |
| rs7187826 | NP_775187 | L | P | LP | possibly damaging |
| rs7187826 | NP_004546 | L | P | LP | possibly damaging |
| rs7187826 | NP_775188 | L | P | LP | possibly damaging |
| rs7187889 | NP_000503 | T | M | TM | benign            |
| rs7188200 | NP_777577 | L | P | LP | probably damaging |
| rs7188554 | NP_071938 | H | R | HR | possibly damaging |
| rs7188856 | NP_057340 | I | T | IT | benign            |
| rs7189300 | XP_496134 | L | Q | LQ | possibly damaging |
| rs7189697 | NP_071752 | G | S | GS | benign            |
| rs7189978 | XP_370992 | Q | R | QR | benign            |
| rs7190372 | NP_001288 | P | S | PS | benign            |
| rs7190666 | NP_055526 | M | I | MI | benign            |
| rs7190823 | NP_000126 | T | A | TA | benign            |
| rs7190978 | NP_001288 | D | E | DE | benign            |
| rs7191155 | NP_694940 | L | P | LP | benign            |
| rs7191331 | NP_060701 | T | I | TI | benign            |
| rs7191351 | NP_877417 | Q | L | QL | probably damaging |
| rs7191921 | NP_060594 | G | V | GV | possibly damaging |
| rs7192210 | NP_060358 | E | K | EK | benign            |
| rs7192948 | NP_877417 | S | Y | SY | possibly damaging |
| rs7192962 | NP_060460 | N | I | NI | probably damaging |



|           |           |   |   |    |                   |
|-----------|-----------|---|---|----|-------------------|
| rs7193297 | NP_008816 | A | S | AS | benign            |
| rs7193541 | NP_060594 | I | V | IV | benign            |
| rs7193572 | NP_060701 | L | P | LP | benign            |
| rs7193955 | NP_150229 | C | R | CR | possibly damaging |
| rs7194136 | NP_877417 | Q | H | QH | possibly damaging |
| rs7194407 | XP_292512 | S | P | SP | possibly damaging |
| rs7194844 | NP_997397 | Q | E | QE | benign            |
| rs7194844 | NP_060172 | Q | E | QE | benign            |
| rs7194871 | NP_877417 | K | Q | KQ | benign            |
| rs7195066 | NP_000126 | G | D | GD | benign            |
| rs7195142 | NP_055586 | R | Q | RQ | benign            |
| rs7195142 | NP_919333 | R | Q | RQ | possibly damaging |
| rs7195194 | NP_659547 | T | R | TR | benign            |
| rs7195805 | NP_055430 | R | Q | RQ | benign            |
| rs7196016 | NP_115645 | S | C | SC | probably damaging |
| rs7196188 | NP_005613 | P | T | PT | benign            |
| rs7196188 | NP_973729 | P | T | PT | benign            |
| rs7196345 | NP_115820 | P | S | PS | benign            |
| rs7196482 | NP_758857 | G | R | GR | possibly damaging |
| rs7196726 | NP_055514 | G | D | GD | benign            |
| rs7196804 | NP_074035 | V | M | VM | benign            |
| rs7196804 | NP_002465 | V | M | VM | benign            |
| rs7197352 | NP_001248 | L | S | LS | benign            |
| rs7197424 | XP_292504 | P | S | PS | possibly damaging |
| rs7197779 | NP_000237 | R | Q | RQ | benign            |
| rs7198458 | NP_004156 | Q | P | QP | benign            |
| rs7198494 | NP_689550 | I | T | IT | benign            |
| rs7198865 | NP_036238 | E | K | EK | benign            |
| rs7199313 | XP_377407 | R | C | RC | possibly damaging |
| rs7200126 | NP_060028 | T | N | TN | benign            |
| rs7200143 | NP_689865 | Q | R | QR | benign            |
| rs7200466 | NP_071449 | V | I | VI | benign            |
| rs7200485 | NP_060028 | R | P | RP | possibly damaging |
| rs7201174 | XP_370968 | H | R | HR | possibly damaging |
| rs7201448 | NP_000623 | A | V | AV | benign            |
| rs7201481 | NP_055515 | A | S | AS | benign            |
| rs7201683 | NP_061030 | L | V | LV | benign            |
| rs7202010 | NP_631909 | A | V | AV | benign            |
| rs7202502 | XP_372607 | A | V | AV | benign            |
| rs7202618 | NP_660313 | P | L | PL | probably damaging |
| rs7202925 | NP_207837 | E | D | ED | benign            |
| rs7203084 | XP_497494 | A | V | AV | benign            |
| rs7203801 | NP_006653 | A | V | AV | benign            |
| rs7205299 | NP_997397 | A | V | AV | benign            |
| rs7205673 | NP_877417 | P | L | PL | probably damaging |
| rs7206111 | NP_443722 | T | K | TK | benign            |

|           |           |   |   |    |                   |
|-----------|-----------|---|---|----|-------------------|
| rs7206332 | NP_036258 | A | T | AT | benign            |
| rs7206332 | NP_078809 | A | T | AT | benign            |
| rs7206509 | NP_689669 | S | T | ST | benign            |
| rs7207402 | NP_000410 | V | L | VL | benign            |
| rs7207414 | XP_064265 | M | R | MR | probably damaging |
| rs7207965 | NP_064706 | A | T | AT | benign            |
| rs7208207 | NP_061184 | Y | C | YC | probably damaging |
| rs7208422 | NP_689681 | N | I | NI | benign            |
| rs7208693 | NP_000241 | V | F | VF | benign            |
| rs7208980 | NP_115971 | H | Y | HY | possibly damaging |
| rs7209228 | NP_853513 | G | D | GD | benign            |
| rs7209474 | NP_932348 | M | V | MV | benign            |
| rs7209610 | NP_113644 | R | G | RG | probably damaging |
| rs7210156 | XP_371053 | P | L | PL | probably damaging |
| rs7210262 | NP_115971 | E | G | EG | benign            |
| rs7210616 | NP_839947 | R | Q | RQ | benign            |
| rs7211159 | NP_112497 | D | E | DE | benign            |
| rs7211440 | NP_922921 | S | P | SP | benign            |
| rs7211440 | NP_115698 | S | P | SP | possibly damaging |
| rs7211480 | NP_061889 | G | D | GD | probably damaging |
| rs7211875 | NP_597683 | S | P | SP | benign            |
| rs7211875 | NP_001479 | S | P | SP | possibly damaging |
| rs7212260 | NP_005073 | V | G | VG | benign            |
| rs7212483 | NP_061883 | S | N | SN | benign            |
| rs7212506 | NP_525023 | M | I | MI | benign            |
| rs7212573 | NP_543139 | T | A | TA | benign            |
| rs7212634 | NP_659505 | T | I | TI | benign            |
| rs7212938 | NP_835465 | L | V | LV | benign            |
| rs7212944 | NP_835465 | E | K | EK | benign            |
| rs7213119 | NP_057602 | R | C | RC | possibly damaging |
| rs7213256 | NP_998821 | R | Q | RQ | benign            |
| rs7213444 | XP_371084 | T | A | TA | benign            |
| rs7213548 | XP_371079 | C | S | CS | benign            |
| rs7213731 | NP_694962 | I | M | IM | benign            |
| rs7213894 | XP_085578 | T | I | TI | possibly damaging |
| rs7214136 | NP_004167 | R | Q | RQ | benign            |
| rs7214448 | NP_689483 | G | S | GS | possibly damaging |
| rs7214723 | NP_757343 | E | G | EG | benign            |
| rs7214723 | NP_757344 | G | E | GE | possibly damaging |
| rs7214751 | NP_689483 | A | T | AT | benign            |
| rs7215148 | NP_683718 | E | Q | EQ | benign            |
| rs7215148 | NP_004160 | E | Q | EQ | benign            |
| rs7215209 | NP_060566 | K | R | KR | benign            |
| rs7215458 | NP_000143 | P | R | PR | probably damaging |
| rs7215698 | NP_002713 | E | G | EG | possibly damaging |
| rs7215958 | XP_050041 | R | H | RH | possibly damaging |

|           |           |   |   |    |                   |
|-----------|-----------|---|---|----|-------------------|
| rs7216284 | NP_699169 | W | R | WR | probably damaging |
| rs7216445 | NP_689513 | M | V | MV | benign            |
| rs7216445 | NP_008941 | M | V | MV | benign            |
| rs7216623 | NP_002894 | T | A | TA | benign            |
| rs7216787 | XP_290743 | G | D | GD | possibly damaging |
| rs7218599 | NP_543139 | Q | H | QH | benign            |
| rs7218738 | XP_371079 | P | S | PS | possibly damaging |
| rs7218767 | NP_001979 | E | D | ED | benign            |
| rs7218964 | XP_292627 | L | I | LI | benign            |
| rs7219366 | NP_005883 | A | P | AP | benign            |
| rs7220243 | NP_066005 | S | P | SP | benign            |
| rs7220988 | NP_056258 | P | L | PL | possibly damaging |
| rs7221187 | NP_976063 | A | V | AV | benign            |
| rs7221187 | NP_510880 | A | V | AV | benign            |
| rs7221752 | NP_079473 | T | P | TP | benign            |
| rs7221752 | NP_788275 | T | P | TP | benign            |
| rs7221752 | NP_788276 | T | P | TP | possibly damaging |
| rs7222013 | NP_004685 | F | I | FI | possibly damaging |
| rs7222276 | NP_938190 | R | H | RH | benign            |
| rs7222276 | NP_938191 | R | H | RH | benign            |
| rs7222276 | NP_938192 | R | H | RH | benign            |
| rs7222276 | NP_938193 | R | H | RH | benign            |
| rs7222276 | NP_938194 | R | H | RH | benign            |
| rs7222276 | NP_938196 | R | H | RH | benign            |
| rs7222276 | NP_938197 | R | H | RH | benign            |
| rs7222276 | NP_938198 | R | H | RH | benign            |
| rs7222276 | NP_938199 | R | H | RH | benign            |
| rs7222276 | NP_938200 | R | H | RH | benign            |
| rs7222276 | NP_938201 | R | H | RH | benign            |
| rs7222276 | NP_938202 | R | H | RH | benign            |
| rs7222276 | NP_938406 | R | H | RH | benign            |
| rs7222276 | NP_938407 | R | H | RH | benign            |
| rs7222276 | NP_061496 | R | H | RH | benign            |
| rs7222388 | NP_056109 | V | I | VI | benign            |
| rs7222491 | NP_004850 | L | V | LV | benign            |
| rs7222520 | NP_689676 | V | I | VI | benign            |
| rs7222757 | NP_775818 | V | G | VG | benign            |
| rs7222862 | NP_115684 | R | W | RW | probably damaging |
| rs7223226 | NP_114171 | N | D | ND | benign            |
| rs7224330 | NP_543139 | T | I | TI | benign            |
| rs7224496 | NP_443160 | I | R | IR | possibly damaging |
| rs7224723 | NP_065704 | K | T | KT | benign            |
| rs7224861 | NP_694960 | R | Q | RQ | benign            |
| rs7224888 | NP_703147 | C | R | CR | probably damaging |
| rs7224902 | NP_002542 | L | F | LF | benign            |
| rs7224902 | NP_036505 | L | F | LF | benign            |

|           |           |   |   |    |                   |
|-----------|-----------|---|---|----|-------------------|
| rs7225107 | NP_001132 | I | V | IV | probably damaging |
| rs7225888 | NP_115698 | H | Q | HQ | benign            |
| rs7225888 | NP_922921 | H | Q | HQ | possibly damaging |
| rs7226091 | XP_375500 | H | Q | HQ | benign            |
| rs7226137 | NP_002135 | E | G | EG | benign            |
| rs7226192 | NP_005548 | G | S | GS | possibly damaging |
| rs7226363 | NP_114104 | R | H | RH | benign            |
| rs7229252 | NP_817123 | I | T | IT | benign            |
| rs7229433 | NP_003794 | E | K | EK | benign            |
| rs7229690 | NP_057355 | K | R | KR | benign            |
| rs7229727 | XP_496264 | V | A | VA | benign            |
| rs7230131 | NP_115500 | R | Q | RQ | benign            |
| rs7232237 | XP_290811 | M | V | MV | benign            |
| rs7234328 | NP_056291 | D | N | DN | benign            |
| rs7234999 | NP_443179 | H | Y | HY | benign            |
| rs7235420 | NP_003400 | Q | R | QR | benign            |
| rs7235423 | XP_113971 | D | V | DV | probably damaging |
| rs7235740 | NP_003400 | E | G | EG | possibly damaging |
| rs7235917 | NP_056276 | D | N | DN | benign            |
| rs7236435 | XP_371116 | H | P | HP | probably damaging |
| rs7238035 | XP_371114 | P | S | PS | benign            |
| rs7238500 | NP_005350 | M | V | MV | possibly damaging |
| rs7239480 | XP_091830 | I | V | IV | benign            |
| rs7240487 | XP_292700 | A | P | AP | possibly damaging |
| rs7240666 | NP_443179 | V | I | VI | benign            |
| rs7240860 | NP_741996 | T | A | TA | possibly damaging |
| rs7242538 | NP_031371 | S | F | SF | possibly damaging |
| rs7243088 | NP_056023 | T | S | TS | benign            |
| rs7244624 | NP_056276 | I | V | IV | benign            |
| rs7245396 | NP_060378 | G | A | GA | benign            |
| rs7245423 | XP_496314 | T | I | TI | benign            |
| rs7245429 | NP_115823 | P | H | PH | probably damaging |
| rs7245558 | NP_115823 | T | N | TN | benign            |
| rs7245561 | NP_612143 | K | R | KR | benign            |
| rs7245761 | XP_373433 | V | A | VA | benign            |
| rs7245805 | NP_077293 | S | G | SG | benign            |
| rs7245807 | NP_201586 | Y | C | YC | possibly damaging |
| rs7245807 | NP_443729 | Y | C | YC | probably damaging |
| rs7245858 | XP_372741 | L | P | LP | possibly damaging |
| rs7245978 | NP_002774 | Y | H | YH | possibly damaging |
| rs7246232 | NP_005348 | R | S | RS | benign            |
| rs7246376 | NP_115823 | P | L | PL | benign            |
| rs7246400 | NP_775802 | I | T | IT | benign            |
| rs7246737 | NP_005865 | F | S | FS | benign            |
| rs7246856 | XP_371200 | I | R | IR | possibly damaging |
| rs7246969 | XP_064883 | S | F | SF | probably damaging |

|           |           |   |   |    |                   |
|-----------|-----------|---|---|----|-------------------|
| rs7246980 | XP_064883 | A | V | AV | possibly damaging |
| rs7246981 | NP_000765 | P | L | PL | probably damaging |
| rs7247001 | NP_201574 | N | S | NS | benign            |
| rs7247025 | NP_005865 | R | G | RG | benign            |
| rs7247055 | NP_005865 | T | R | TR | benign            |
| rs7247162 | NP_892018 | E | K | EK | benign            |
| rs7247190 | NP_059979 | P | S | PS | benign            |
| rs7247190 | NP_612630 | P | S | PS | probably damaging |
| rs7247284 | NP_006388 | L | S | LS | benign            |
| rs7247451 | NP_005865 | W | C | WC | benign            |
| rs7247504 | NP_060190 | N | D | ND | benign            |
| rs7247538 | NP_005865 | Y | H | YH | benign            |
| rs7247751 | XP_372708 | P | L | PL | possibly damaging |
| rs7248193 | NP_060770 | H | R | HR | benign            |
| rs7248295 | NP_112490 | Y | S | YS | benign            |
| rs7248296 | NP_006857 | L | F | LF | benign            |
| rs7248508 | NP_004136 | V | A | VA | benign            |
| rs7248674 | NP_612143 | H | D | HD | benign            |
| rs7248778 | NP_001514 | R | C | RC | benign            |
| rs7248839 | NP_003881 | G | V | GV | probably damaging |
| rs7248888 | NP_060685 | C | Y | CY | benign            |
| rs7248970 | NP_000166 | A | G | AG | benign            |
| rs7249021 | NP_112490 | A | T | AT | benign            |
| rs7249054 | NP_006857 | R | C | RC | benign            |
| rs7249069 | NP_940873 | E | K | EK | benign            |
| rs7249106 | XP_290865 | A | V | AV | benign            |
| rs7249154 | NP_006857 | G | A | GA | benign            |
| rs7249156 | NP_005157 | A | P | AP | benign            |
| rs7249222 | NP_068713 | D | N | DN | benign            |
| rs7249222 | NP_001690 | D | N | DN | benign            |
| rs7249230 | NP_004354 | E | K | EK | benign            |
| rs7249305 | NP_000946 | H | R | HR | benign            |
| rs7249379 | XP_371138 | V | F | VF | probably damaging |
| rs7249410 | NP_940942 | R | W | RW | probably damaging |
| rs7249419 | NP_542157 | R | G | RG | possibly damaging |
| rs7249419 | NP_004049 | R | G | RG | probably damaging |
| rs7249743 | NP_003881 | M | V | MV | benign            |
| rs7249808 | XP_496291 | P | L | PL | benign            |
| rs7249811 | NP_006857 | V | G | VG | probably damaging |
| rs7249952 | NP_065863 | I | T | IT | benign            |
| rs7249989 | NP_056534 | R | Q | RQ | benign            |
| rs7250083 | NP_065746 | K | M | KM | benign            |
| rs7250282 | NP_061025 | L | S | LS | benign            |
| rs7250438 | XP_371152 | T | I | TI | possibly damaging |
| rs7250630 | NP_003429 | H | R | HR | probably damaging |
| rs7250795 | XP_371138 | T | M | TM | possibly damaging |

|           |           |   |   |    |                   |
|-----------|-----------|---|---|----|-------------------|
| rs7250894 | XP_371138 | R | G | RG | probably damaging |
| rs7250947 | XP_375558 | R | C | RC | possibly damaging |
| rs7250969 | NP_003429 | R | Q | RQ | benign            |
| rs7251008 | NP_976308 | G | R | GR | benign            |
| rs7251041 | XP_114000 | P | L | PL | probably damaging |
| rs7251081 | NP_443204 | G | S | GS | benign            |
| rs7251226 | NP_660288 | Q | H | QH | possibly damaging |
| rs7251437 | NP_003074 | A | G | AG | benign            |
| rs7251713 | NP_919409 | R | Q | RQ | benign            |
| rs7251713 | NP_055496 | R | Q | RQ | benign            |
| rs7251797 | NP_036424 | S | G | SG | benign            |
| rs7251798 | NP_006201 | V | L | VL | benign            |
| rs7251853 | XP_375664 | P | A | PA | possibly damaging |
| rs7251858 | XP_375558 | A | T | AT | benign            |
| rs7252070 | XP_496291 | T | A | TA | benign            |
| rs7252121 | NP_892018 | T | I | TI | benign            |
| rs7252128 | NP_940859 | T | R | TR | benign            |
| rs7252175 | NP_036287 | L | F | LF | possibly damaging |
| rs7252210 | NP_653165 | V | M | VM | benign            |
| rs7252299 | NP_112219 | H | Q | HQ | possibly damaging |
| rs7252640 | NP_778148 | R | C | RC | benign            |
| rs7252811 | NP_003191 | P | S | PS | probably damaging |
| rs7252818 | NP_940859 | M | V | MV | possibly damaging |
| rs7253155 | NP_620129 | M | I | MI | benign            |
| rs7253301 | NP_071907 | F | L | FL | possibly damaging |
| rs7253301 | NP_690009 | F | L | FL | possibly damaging |
| rs7253301 | NP_690008 | F | L | FL | possibly damaging |
| rs7253301 | NP_690007 | F | L | FL | possibly damaging |
| rs7254227 | NP_775904 | L | M | LM | benign            |
| rs7254284 | XP_055866 | A | S | AS | benign            |
| rs7254311 | NP_003420 | K | T | KT | probably damaging |
| rs7254436 | XP_497613 | T | R | TR | benign            |
| rs7254529 | XP_371138 | Y | H | YH | benign            |
| rs7254762 | XP_497613 | K | M | KM | probably damaging |
| rs7254819 | XP_496290 | E | Q | EQ | benign            |
| rs7254995 | XP_290865 | C | G | CG | probably damaging |
| rs7255057 | NP_689997 | H | R | HR | possibly damaging |
| rs7255186 | NP_848639 | L | F | LF | benign            |
| rs7255187 | XP_375558 | A | E | AE | benign            |
| rs7255298 | XP_375558 | T | I | TI | possibly damaging |
| rs7255518 | XP_496314 | V | I | VI | benign            |
| rs7255668 | XP_496322 | Y | D | YD | probably damaging |
| rs7255721 | NP_112219 | T | S | TS | benign            |
| rs7255780 | XP_065124 | A | G | AG | benign            |
| rs7256147 | NP_001965 | V | I | VI | benign            |
| rs7256321 | NP_005806 | P | Q | PQ | possibly damaging |

|           |           |   |   |    |                   |
|-----------|-----------|---|---|----|-------------------|
| rs7256387 | XP_375558 | K | N | KN | possibly damaging |
| rs7256437 | NP_079465 | P | S | PS | benign            |
| rs7256696 | XP_371165 | S | F | SF | benign            |
| rs7256712 | XP_375558 | M | T | MT | benign            |
| rs7256787 | NP_775754 | K | Q | KQ | benign            |
| rs7256789 | NP_000055 | Q | R | QR | benign            |
| rs7257461 | NP_006342 | S | T | ST | benign            |
| rs7257948 | NP_115823 | D | E | DE | benign            |
| rs7258015 | NP_002153 | G | R | GR | possibly damaging |
| rs7258088 | NP_065879 | A | G | AG | benign            |
| rs7258248 | XP_371200 | L | P | LP | possibly damaging |
| rs7258368 | NP_660276 | V | M | VM | benign            |
| rs7258517 | NP_037492 | F | V | FV | benign            |
| rs7258951 | NP_149121 | P | T | PT | benign            |
| rs7258963 | XP_053966 | V | A | VA | benign            |
| rs7259039 | NP_443116 | W | G | WG | probably damaging |
| rs7259041 | NP_056498 | L | P | LP | benign            |
| rs7259266 | XP_085831 | M | I | MI | benign            |
| rs7259303 | NP_078967 | G | D | GD | possibly damaging |
| rs7259358 | XP_375660 | H | Y | HY | benign            |
| rs7259684 | XP_371139 | K | E | KE | benign            |
| rs7259700 | NP_000914 | L | P | LP | possibly damaging |
| rs7259721 | XP_375558 | K | N | KN | possibly damaging |
| rs7259845 | XP_371139 | T | A | TA | benign            |
| rs7260332 | NP_112490 | S | T | ST | benign            |
| rs7260508 | XP_496314 | R | H | RH | benign            |
| rs7260518 | XP_375558 | S | G | SG | possibly damaging |
| rs7260579 | NP_003314 | A | T | AT | benign            |
| rs7260582 | XP_496319 | Y | C | YC | probably damaging |
| rs7260784 | NP_942093 | P | T | PT | probably damaging |
| rs7263910 | NP_002998 | Q | R | QR | benign            |
| rs7264086 | NP_004767 | A | S | AS | benign            |
| rs7264544 | NP_002242 | Q | R | QR | benign            |
| rs7265854 | NP_699191 | Y | H | YH | possibly damaging |
| rs7265902 | NP_699191 | R | Q | RQ | benign            |
| rs7266677 | NP_002651 | A | V | AV | benign            |
| rs7266677 | NP_877963 | A | V | AV | benign            |
| rs7267202 | NP_787073 | E | K | EK | benign            |
| rs7268389 | NP_113671 | D | V | DV | probably damaging |
| rs7269297 | NP_055299 | S | A | SA | benign            |
| rs7269579 | NP_005551 | V | L | VL | benign            |
| rs7270526 | NP_002998 | E | Q | EQ | benign            |
| rs7271583 | NP_065871 | R | C | RC | probably damaging |
| rs7272354 | NP_003425 | G | R | GR | benign            |
| rs7272669 | NP_003425 | S | N | SN | benign            |
| rs7273455 | NP_997004 | A | P | AP | benign            |

|           |           |   |   |    |                   |
|-----------|-----------|---|---|----|-------------------|
| rs7273482 | XP_371398 | V | E | VE | probably damaging |
| rs7273698 | NP_690593 | R | W | RW | possibly damaging |
| rs7274519 | NP_006233 | R | C | RC | probably damaging |
| rs7277175 | NP_006022 | Q | R | QR | benign            |
| rs7277425 | XP_375931 | V | G | VG | possibly damaging |
| rs7277917 | NP_067042 | L | F | LF | benign            |
| rs7278340 | NP_005119 | S | L | SL | possibly damaging |
| rs7278825 | NP_919231 | A | V | AV | benign            |
| rs7279064 | NP_000865 | F | V | FV | benign            |
| rs7279064 | NP_997467 | F | V | FV | benign            |
| rs7279064 | NP_997468 | F | V | FV | benign            |
| rs7279204 | NP_006022 | R | C | RC | possibly damaging |
| rs7279701 | XP_375931 | D | G | DG | possibly damaging |
| rs7280643 | NP_658983 | H | R | HR | possibly damaging |
| rs7280841 | NP_859016 | V | I | VI | benign            |
| rs7280902 | XP_497781 | T | A | TA | benign            |
| rs7281915 | XP_375931 | T | A | TA | benign            |
| rs7282594 | NP_387510 | P | S | PS | benign            |
| rs7282630 | XP_375936 | R | K | RK | benign            |
| rs7283272 | NP_001840 | V | L | VL | benign            |
| rs7283507 | NP_996772 | P | A | PA | possibly damaging |
| rs7283507 | NP_996774 | P | A | PA | possibly damaging |
| rs7283507 | NP_996773 | P | A | PA | possibly damaging |
| rs7284177 | NP_115997 | G | S | GS | benign            |
| rs7284524 | NP_003316 | C | S | CS | benign            |
| rs7285167 | NP_663612 | R | C | RC | possibly damaging |
| rs7285319 | NP_001420 | P | H | PH | probably damaging |
| rs7287089 | NP_055061 | R | P | RP | benign            |
| rs7288201 | NP_004112 | I | V | IV | benign            |
| rs7290488 | NP_114116 | G | D | GD | benign            |
| rs7290488 | NP_872292 | G | D | GD | benign            |
| rs7290694 | NP_006062 | K | R | KR | benign            |
| rs7291048 | XP_376008 | A | V | AV | benign            |
| rs7291444 | NP_006062 | T | P | TP | benign            |
| rs7291633 | NP_000487 | H | L | HL | probably damaging |
| rs7291910 | XP_018487 | P | R | PR | possibly damaging |
| rs7292212 | NP_741999 | A | D | AD | benign            |
| rs7292419 | XP_496520 | S | P | SP | possibly damaging |
| rs7292477 | XP_170994 | A | D | AD | benign            |
| rs7292659 | NP_110434 | D | N | DN | benign            |
| rs7294691 | XP_292012 | L | F | LF | possibly damaging |
| rs7295376 | NP_060479 | G | R | GR | possibly damaging |
| rs7295646 | NP_689803 | P | H | PH | probably damaging |
| rs7295804 | XP_495909 | E | K | EK | benign            |
| rs7296162 | XP_045423 | S | L | SL | possibly damaging |
| rs7297122 | NP_116203 | T | M | TM | possibly damaging |



|           |           |   |   |    |                   |
|-----------|-----------|---|---|----|-------------------|
| rs7297245 | NP_002099 | V | I | VI | benign            |
| rs7297413 | NP_149034 | G | R | GR | probably damaging |
| rs7297912 | XP_497330 | G | R | GR | possibly damaging |
| rs7298124 | XP_495908 | S | I | SI | benign            |
| rs7298565 | NP_904323 | R | Q | RQ | benign            |
| rs7298565 | NP_904324 | R | Q | RQ | benign            |
| rs7298565 | NP_569733 | R | Q | RQ | benign            |
| rs7298766 | NP_775864 | R | K | RK | benign            |
| rs7299217 | NP_057280 | E | Q | EQ | benign            |
| rs7300096 | XP_208080 | D | Y | DY | probably damaging |
| rs7300972 | NP_002997 | M | V | MV | benign            |
| rs7301414 | NP_061907 | M | L | ML | possibly damaging |
| rs7301923 | XP_495919 | C | Y | CY | benign            |
| rs7301926 | NP_919337 | K | R | KR | possibly damaging |
| rs7301926 | NP_001971 | K | R | KR | possibly damaging |
| rs7302230 | NP_055533 | S | G | SG | benign            |
| rs7302968 | NP_778238 | T | M | TM | benign            |
| rs7302981 | NP_671723 | C | R | CR | possibly damaging |
| rs7304054 | NP_787070 | K | R | KR | benign            |
| rs7304974 | XP_209597 | R | Q | RQ | benign            |
| rs7305024 | NP_115523 | E | Q | EQ | benign            |
| rs7305327 | XP_498535 | D | G | DG | possibly damaging |
| rs7305779 | XP_497345 | E | A | EA | possibly damaging |
| rs7306491 | XP_497345 | R | H | RH | benign            |
| rs7306642 | NP_060034 | P | T | PT | benign            |
| rs7307331 | NP_061959 | H | Y | HY | benign            |
| rs7307415 | NP_689530 | H | R | HR | possibly damaging |
| rs7307426 | XP_292085 | P | L | PL | probably damaging |
| rs7307702 | NP_009128 | D | E | DE | benign            |
| rs7307793 | XP_374989 | R | H | RH | benign            |
| rs7308720 | XP_058513 | N | K | NK | benign            |
| rs7308853 | NP_004849 | N | S | NS | benign            |
| rs7309149 | XP_495912 | P | R | PR | probably damaging |
| rs7309831 | NP_938079 | V | I | VI | benign            |
| rs7310138 | NP_542785 | D | E | DE | benign            |
| rs7310837 | XP_012219 | M | I | MI | probably damaging |
| rs7310898 | NP_055523 | P | L | PL | probably damaging |
| rs7311122 | NP_715624 | G | V | GV | benign            |
| rs7311122 | NP_631874 | G | V | GV | possibly damaging |
| rs7311122 | NP_631875 | G | V | GV | possibly damaging |
| rs7311358 | NP_062818 | M | I | MI | benign            |
| rs7311877 | NP_005328 | T | A | TA | benign            |
| rs7311986 | NP_116218 | S | I | SI | benign            |
| rs7313020 | NP_005495 | E | K | EK | benign            |
| rs7314976 | NP_808219 | R | C | RC | possibly damaging |
| rs7315516 | NP_149022 | Y | N | YN | probably damaging |

|           |           |   |   |    |                   |
|-----------|-----------|---|---|----|-------------------|
| rs7315591 | NP_653271 | T | A | TA | benign            |
| rs7315685 | NP_060933 | D | N | DN | benign            |
| rs7315692 | XP_374987 | I | V | IV | benign            |
| rs7315731 | NP_004710 | F | Y | FY | benign            |
| rs7315923 | XP_495917 | C | F | CF | benign            |
| rs7316147 | XP_495917 | C | W | CW | benign            |
| rs7317245 | NP_689932 | K | E | KE | benign            |
| rs7317291 | XP_497370 | M | I | MI | benign            |
| rs7318420 | NP_808882 | P | R | PR | probably damaging |
| rs7319493 | NP_060375 | A | T | AT | benign            |
| rs7320209 | NP_055885 | S | C | SC | benign            |
| rs7320366 | NP_003841 | S | T | ST | benign            |
| rs7321457 | NP_055902 | R | Q | RQ | benign            |
| rs7322326 | XP_495963 | E | K | EK | benign            |
| rs7323148 | NP_758961 | T | I | TI | possibly damaging |
| rs7324275 | NP_060039 | M | V | MV | possibly damaging |
| rs7324704 | XP_062912 | S | L | SL | benign            |
| rs7327901 | XP_495949 | R | C | RC | possibly damaging |
| rs7327915 | XP_292193 | V | M | VM | benign            |
| rs7328155 | NP_001667 | E | K | EK | possibly damaging |
| rs7329939 | XP_292193 | L | V | LV | benign            |
| rs7330220 | NP_008946 | V | I | VI | benign            |
| rs7330736 | NP_694568 | R | W | RW | possibly damaging |
| rs7330808 | XP_062912 | E | D | ED | benign            |
| rs7331070 | NP_003282 | R | Q | RQ | benign            |
| rs7332388 | NP_055768 | T | R | TR | benign            |
| rs7333040 | NP_005923 | G | S | GS | benign            |
| rs7333044 | XP_495965 | H | P | HP | probably damaging |
| rs7334118 | NP_000044 | H | R | HR | probably damaging |
| rs7334587 | NP_006428 | A | V | AV | benign            |
| rs7334868 | XP_062890 | R | H | RH | benign            |
| rs7335867 | NP_060674 | V | I | VI | benign            |
| rs7336216 | NP_060921 | D | H | DH | benign            |
| rs7337071 | XP_166966 | G | E | GE | possibly damaging |
| rs7338624 | NP_060463 | E | D | ED | benign            |
| rs7339904 | NP_055672 | S | G | SG | benign            |
| rs7339962 | XP_496332 | G | R | GR | possibly damaging |
| rs7340007 | NP_006104 | P | L | PL | probably damaging |
| rs7340191 | XP_497879 | G | V | GV | probably damaging |
| rs7340192 | XP_497879 | G | R | GR | possibly damaging |
| rs7340197 | XP_497879 | A | S | AS | benign            |
| rs7340213 | XP_497879 | R | H | RH | possibly damaging |
| rs7340499 | XP_497879 | D | E | DE | benign            |
| rs7341749 | NP_056054 | R | P | RP | possibly damaging |
| rs7342490 | XP_370737 | E | K | EK | benign            |
| rs7342883 | NP_001979 | P | S | PS | possibly damaging |

|           |           |   |   |    |                   |
|-----------|-----------|---|---|----|-------------------|
| rs7343043 | NP_005122 | P | L | PL | possibly damaging |
| rs7343101 | NP_775801 | R | I | RI | probably damaging |
| rs7343500 | NP_001307 | D | E | DE | benign            |
| rs7343858 | NP_056470 | P | L | PL | probably damaging |
| rs7344681 | NP_114423 | E | G | EG | possibly damaging |
| rs7345355 | NP_055091 | S | P | SP | possibly damaging |
| rs7346502 | NP_060622 | I | T | IT | possibly damaging |
| rs7346635 | NP_056326 | T | P | TP | possibly damaging |
| rs7348121 | NP_110404 | I | V | IV | benign            |
| rs7349185 | NP_996809 | C | Y | CY | benign            |
| rs7349185 | NP_065184 | C | Y | CY | probably damaging |
| rs7349186 | NP_115785 | P | L | PL | probably damaging |
| rs7349198 | XP_497879 | G | E | GE | possibly damaging |
| rs7349215 | XP_497879 | V | I | VI | benign            |
| rs7349216 | XP_497879 | G | R | GR | possibly damaging |
| rs7349364 | XP_497879 | R | C | RC | probably damaging |
| rs7349365 | XP_497879 | A | V | AV | benign            |
| rs7349446 | XP_497879 | V | A | VA | benign            |
| rs7350203 | XP_372190 | T | A | TA | benign            |
| rs7350889 | NP_001247 | G | D | GD | possibly damaging |
| rs7350899 | NP_004932 | N | S | NS | possibly damaging |
| rs7350908 | NP_001247 | P | S | PS | probably damaging |
| rs7350956 | NP_612364 | T | R | TR | benign            |
| rs7350974 | NP_612364 | V | M | VM | benign            |
| rs7351141 | NP_710141 | L | P | LP | probably damaging |
| rs7351196 | NP_115597 | G | S | GS | benign            |
| rs7351440 | NP_006517 | K | Q | KQ | benign            |
| rs7352110 | NP_861516 | R | G | RG | probably damaging |
| rs7352110 | NP_861518 | R | G | RG | probably damaging |
| rs7352233 | NP_848578 | E | G | EG | benign            |
| rs7352422 | NP_006029 | L | M | LM | benign            |
| rs7353222 | NP_060667 | Q | P | QP | benign            |
| rs7353222 | NP_955458 | Q | P | QP | benign            |
| rs7353222 | NP_955459 | Q | P | QP | benign            |
| rs7353222 | NP_071371 | Q | P | QP | possibly damaging |
| rs7353635 | NP_000205 | I | T | IT | possibly damaging |
| rs7354578 | NP_787044 | A | S | AS | benign            |
| rs7354578 | NP_787045 | A | S | AS | benign            |
| rs7354578 | NP_787046 | A | S | AS | benign            |
| rs7354578 | NP_008823 | A | S | AS | benign            |
| rs7354779 | NP_787063 | R | G | RG | possibly damaging |
| rs7354779 | NP_037501 | R | G | RG | possibly damaging |
| rs7355686 | XP_497879 | E | V | EV | benign            |
| rs7355689 | XP_497879 | M | V | MV | benign            |
| rs7355766 | XP_497879 | F | L | FL | benign            |
| rs7355811 | NP_115731 | G | S | GS | benign            |

|           |           |   |   |    |                   |
|-----------|-----------|---|---|----|-------------------|
| rs7356031 | NP_705615 | Y | C | YC | probably damaging |
| rs7356031 | NP_705616 | Y | C | YC | probably damaging |
| rs7356932 | NP_598000 | G | S | GS | possibly damaging |
| rs7356934 | NP_002903 | P | L | PL | probably damaging |
| rs7357607 | XP_497051 | M | L | ML | benign            |
| rs7357825 | XP_373340 | R | K | RK | benign            |
| rs7357849 | XP_377073 | D | E | DE | benign            |
| rs7358374 | XP_370652 | R | K | RK | benign            |
| rs7358608 | XP_495908 | R | H | RH | benign            |
| rs7358609 | XP_495908 | G | S | GS | benign            |
| rs7358652 | NP_006304 | G | S | GS | benign            |
| rs7359096 | NP_065869 | G | S | GS | benign            |
| rs7361799 | NP_612140 | T | A | TA | benign            |
| rs7362309 | NP_787073 | G | R | GR | possibly damaging |
| rs7362579 | NP_787060 | W | G | WG | probably damaging |
| rs7362890 | NP_612815 | V | G | VG | possibly damaging |
| rs7363039 | NP_443202 | V | G | VG | possibly damaging |
| rs7363169 | XP_066058 | E | G | EG | possibly damaging |
| rs7365216 | XP_496343 | M | L | ML | possibly damaging |
| rs7365216 | XP_496345 | M | L | ML | possibly damaging |
| rs7366490 | XP_496394 | P | H | PH | probably damaging |
| rs7366933 | XP_057040 | D | N | DN | benign            |
| rs7367494 | NP_000076 | V | A | VA | benign            |
| rs7373165 | NP_149018 | E | D | ED | benign            |
| rs7374710 | NP_004757 | V | G | VG | probably damaging |
| rs7376200 | NP_004468 | S | R | SR | possibly damaging |
| rs7376390 | NP_060286 | R | H | RH | benign            |
| rs7378066 | NP_003643 | T | I | TI | benign            |
| rs7379817 | XP_498030 | V | A | VA | benign            |
| rs7380781 | XP_498030 | E | K | EK | benign            |
| rs7380824 | NP_938023 | R | Q | RQ | benign            |
| rs7381749 | NP_055554 | N | S | NS | benign            |
| rs7386562 | XP_294387 | H | R | HR | probably damaging |
| rs7386782 | XP_070277 | S | G | SG | benign            |
| rs7386783 | XP_070277 | N | D | ND | benign            |
| rs7388581 | XP_044727 | P | A | PA | benign            |
| rs7394584 | XP_372361 | L | R | LR | probably damaging |
| rs7395065 | XP_374860 | F | L | FL | benign            |
| rs7395988 | NP_066025 | Q | H | QH | possibly damaging |
| rs7396383 | XP_290540 | N | I | NI | possibly damaging |
| rs7396938 | XP_372361 | N | I | NI | possibly damaging |
| rs7397032 | XP_370605 | C | R | CR | probably damaging |
| rs7397167 | NP_002323 | P | Q | PQ | possibly damaging |
| rs7397266 | NP_005438 | A | T | AT | benign            |
| rs7406116 | NP_932348 | Q | R | QR | benign            |
| rs7406910 | NP_004493 | A | T | AT | possibly damaging |

|           |           |   |   |    |                   |
|-----------|-----------|---|---|----|-------------------|
| rs7410250 | XP_375931 | R | Q | RQ | benign            |
| rs7410919 | NP_002284 | P | L | PL | probably damaging |
| rs7411539 | XP_496391 | I | M | IM | benign            |
| rs7411539 | XP_375869 | I | M | IM | benign            |
| rs7412488 | NP_004276 | P | H | PH | probably damaging |
| rs7412762 | NP_003585 | S | N | SN | benign            |
| rs7412792 | XP_371269 | L | V | LV | benign            |
| rs7412854 | NP_001277 | L | M | LM | benign            |
| rs7415167 | NP_775179 | V | G | VG | possibly damaging |
| rs7415178 | NP_115633 | T | P | TP | benign            |
| rs7416235 | NP_060555 | L | P | LP | possibly damaging |
| rs7416402 | NP_000806 | S | P | SP | benign            |
| rs7416492 | NP_056473 | L | V | LV | benign            |
| rs7416672 | NP_077007 | S | I | SI | possibly damaging |
| rs7416842 | NP_683706 | G | A | GA | benign            |
| rs7416842 | NP_683707 | G | A | GA | benign            |
| rs7416842 | NP_078862 | G | A | GA | benign            |
| rs7417006 | NP_055642 | R | K | RK | benign            |
| rs7417079 | XP_378840 | T | M | TM | benign            |
| rs7417535 | XP_496348 | Y | C | YC | probably damaging |
| rs7418622 | XP_371328 | S | N | SN | benign            |
| rs7419077 | XP_496343 | C | S | CS | probably damaging |
| rs7419099 | XP_496343 | C | Y | CY | possibly damaging |
| rs7419099 | XP_496345 | C | Y | CY | possibly damaging |
| rs7420093 | NP_036609 | C | W | CW | probably damaging |
| rs7420371 | NP_776182 | E | G | EG | possibly damaging |
| rs7422339 | NP_001866 | T | N | TN | possibly damaging |
| rs7422680 | XP_041126 | T | A | TA | benign            |
| rs7424266 | NP_115544 | G | A | GA | possibly damaging |
| rs7424328 | NP_057047 | G | S | GS | benign            |
| rs7424352 | NP_848625 | M | V | MV | benign            |
| rs7425188 | NP_059522 | V | E | VE | possibly damaging |
| rs7425188 | NP_001608 | V | E | VE | probably damaging |
| rs7425801 | NP_005226 | E | G | EG | possibly damaging |
| rs7425881 | XP_497833 | E | V | EV | possibly damaging |
| rs7426058 | NP_079415 | D | E | DE | benign            |
| rs7426114 | NP_004534 | M | V | MV | benign            |
| rs7426606 | NP_002283 | Q | H | QH | possibly damaging |
| rs7428128 | NP_115731 | E | Q | EQ | benign            |
| rs7429157 | NP_078886 | A | D | AD | possibly damaging |
| rs7430328 | NP_004148 | E | K | EK | possibly damaging |
| rs7430460 | XP_087386 | V | E | VE | benign            |
| rs7432551 | NP_075555 | A | G | AG | benign            |
| rs7433088 | NP_060659 | S | F | SF | benign            |
| rs7433231 | NP_002438 | G | S | GS | benign            |
| rs7435825 | NP_000573 | S | N | SN | benign            |

|           |           |   |   |    |                   |
|-----------|-----------|---|---|----|-------------------|
| rs7436378 | NP_005381 | R | K | RK | possibly damaging |
| rs7436590 | XP_496692 | D | A | DA | possibly damaging |
| rs7437875 | NP_000195 | E | Q | EQ | benign            |
| rs7437926 | XP_376318 | M | T | MT | benign            |
| rs7439186 | NP_057603 | A | V | AV | benign            |
| rs7439366 | NP_001065 | H | Y | HY | probably damaging |
| rs7439520 | XP_496692 | A | T | AT | benign            |
| rs7439869 | NP_064544 | A | V | AV | benign            |
| rs7440485 | NP_004468 | T | S | TS | benign            |
| rs7442098 | NP_055146 | T | S | TS | benign            |
| rs7445271 | NP_006252 | S | N | SN | benign            |
| rs7445471 | NP_061760 | V | E | VE | benign            |
| rs7447092 | NP_001173 | V | A | VA | possibly damaging |
| rs7449840 | NP_689901 | G | A | GA | possibly damaging |
| rs7449864 | XP_371841 | W | L | WL | probably damaging |
| rs7451102 | NP_001892 | D | H | DH | probably damaging |
| rs7451713 | XP_376503 | H | Q | HQ | probably damaging |
| rs7452785 | NP_008989 | E | G | EG | probably damaging |
| rs7453944 | NP_002502 | M | L | ML | benign            |
| rs7454756 | NP_060110 | A | G | AG | benign            |
| rs7455729 | XP_376591 | E | K | EK | benign            |
| rs7456452 | NP_570857 | L | H | LH | benign            |
| rs7456452 | NP_570858 | L | H | LH | benign            |
| rs7456452 | NP_002838 | L | H | LH | benign            |
| rs7456504 | NP_005036 | Q | H | QH | possibly damaging |
| rs7456504 | NP_774959 | Q | H | QH | possibly damaging |
| rs7457245 | NP_004435 | A | D | AD | benign            |
| rs7457437 | NP_001859 | S | Y | SY | benign            |
| rs7457608 | NP_219499 | S | C | SC | possibly damaging |
| rs7458199 | XP_496869 | S | C | SC | benign            |
| rs7459224 | XP_496936 | Y | C | YC | probably damaging |
| rs7459439 | NP_055096 | A | V | AV | benign            |
| rs7459439 | NP_510965 | A | V | AV | benign            |
| rs7461080 | XP_498300 | A | D | AD | benign            |
| rs7461080 | XP_378043 | D | A | DA | possibly damaging |
| rs7461970 | NP_057026 | E | G | EG | possibly damaging |
| rs7463816 | XP_051271 | S | N | SN | benign            |
| rs7463888 | NP_004736 | T | M | TM | benign            |
| rs7464291 | NP_060538 | N | I | NI | probably damaging |
| rs7464560 | NP_037489 | E | K | EK | benign            |
| rs7466798 | XP_054983 | E | A | EA | possibly damaging |
| rs7467660 | NP_150090 | V | A | VA | benign            |
| rs7467660 | NP_150089 | V | A | VA | benign            |
| rs7469920 | NP_001597 | V | A | VA | benign            |
| rs7469920 | NP_997698 | V | A | VA | benign            |
| rs7470764 | NP_689499 | A | P | AP | benign            |

|           |           |   |   |    |                   |
|-----------|-----------|---|---|----|-------------------|
| rs7474275 | NP_000052 | W | G | WG | probably damaging |
| rs7478041 | XP_290462 | E | K | EK | benign            |
| rs7478486 | NP_510869 | N | I | NI | possibly damaging |
| rs7478486 | NP_510868 | N | I | NI | possibly damaging |
| rs7478486 | NP_057651 | N | I | NI | possibly damaging |
| rs7478799 | NP_542392 | L | F | LF | benign            |
| rs7479477 | XP_372353 | R | H | RH | possibly damaging |
| rs7481466 | NP_694569 | V | A | VA | benign            |
| rs7481521 | XP_290540 | V | M | VM | benign            |
| rs7481951 | NP_998764 | L | F | LF | benign            |
| rs7482504 | XP_497281 | R | C | RC | possibly damaging |
| rs7482965 | NP_612202 | F | Y | FY | benign            |
| rs7483122 | XP_372353 | I | T | IT | probably damaging |
| rs7483314 | NP_055199 | L | V | LV | benign            |
| rs7483525 | XP_171528 | G | A | GA | benign            |
| rs7484157 | NP_001019 | N | K | NK | possibly damaging |
| rs7484937 | NP_005438 | R | T | RT | possibly damaging |
| rs7487311 | NP_055134 | D | Y | DY | probably damaging |
| rs7487586 | NP_071941 | P | A | PA | probably damaging |
| rs7487683 | NP_602296 | G | R | GR | possibly damaging |
| rs7488179 | NP_005759 | S | T | ST | benign            |
| rs7488262 | NP_775489 | D | E | DE | benign            |
| rs7488416 | XP_497350 | Q | H | QH | benign            |
| rs7488798 | NP_550433 | Q | R | QR | possibly damaging |
| rs7489637 | XP_375041 | R | W | RW | possibly damaging |
| rs7490338 | XP_495963 | V | G | VG | probably damaging |
| rs7491932 | NP_443142 | L | M | LM | benign            |
| rs7495616 | NP_055087 | G | A | GA | benign            |
| rs7496176 | XP_370826 | A | V | AV | benign            |
| rs7496668 | NP_620688 | S | L | SL | benign            |
| rs7497438 | NP_115572 | A | S | AS | benign            |
| rs7497617 | NP_004127 | P | L | PL | probably damaging |
| rs7497814 | XP_085234 | L | I | LI | benign            |
| rs7498144 | NP_057368 | L | R | LR | benign            |
| rs7498144 | NP_996882 | L | R | LR | benign            |
| rs7498256 | NP_071445 | Q | H | QH | possibly damaging |
| rs7498376 | XP_370992 | Y | C | YC | probably damaging |
| rs7498509 | XP_496122 | V | L | VL | benign            |
| rs7498598 | XP_496122 | E | D | ED | benign            |
| rs7498665 | NP_056318 | A | T | AT | benign            |
| rs7498959 | XP_496122 | M | T | MT | benign            |
| rs7499664 | NP_663760 | A | T | AT | benign            |
| rs7499664 | NP_680780 | A | T | AT | benign            |
| rs7499664 | NP_680781 | A | T | AT | benign            |
| rs7499664 | NP_680782 | A | T | AT | benign            |
| rs7499664 | NP_009176 | A | T | AT | benign            |

|           |           |   |   |    |                   |
|-----------|-----------|---|---|----|-------------------|
| rs7501023 | NP_001472 | F | L | FL | possibly damaging |
| rs7501331 | NP_059125 | A | V | AV | benign            |
| rs7501608 | NP_981945 | T | S | TS | benign            |
| rs7501847 | XP_042698 | Y | C | YC | probably damaging |
| rs7502059 | NP_009230 | A | V | AV | benign            |
| rs7502059 | NP_009231 | A | V | AV | benign            |
| rs7502059 | NP_009232 | A | V | AV | benign            |
| rs7502059 | NP_009233 | A | V | AV | benign            |
| rs7502059 | NP_009228 | A | V | AV | benign            |
| rs7503034 | NP_000190 | R | H | RH | benign            |
| rs7503373 | NP_065804 | G | E | GE | benign            |
| rs7503661 | NP_085133 | S | F | SF | possibly damaging |
| rs7503669 | NP_742084 | A | V | AV | benign            |
| rs7503669 | NP_742085 | A | V | AV | benign            |
| rs7503669 | NP_003799 | A | V | AV | benign            |
| rs7503669 | NP_742086 | A | V | AV | benign            |
| rs7505568 | XP_496269 | C | R | CR | probably damaging |
| rs7507268 | NP_005806 | D | N | DN | benign            |
| rs7507533 | NP_009078 | S | T | ST | benign            |
| rs7507757 | NP_005026 | A | T | AT | benign            |
| rs7508059 | XP_375590 | T | A | TA | benign            |
| rs7508494 | XP_375590 | E | K | EK | possibly damaging |
| rs7508547 | XP_371198 | Y | C | YC | probably damaging |
| rs7508641 | NP_849159 | G | W | GW | benign            |
| rs7508653 | NP_974223 | E | Q | EQ | benign            |
| rs7508667 | XP_375593 | D | N | DN | benign            |
| rs7508676 | NP_000518 | V | A | VA | benign            |
| rs7508949 | NP_057736 | R | G | RG | possibly damaging |
| rs7509261 | NP_006800 | W | S | WS | probably damaging |
| rs7509382 | NP_002827 | S | Y | SY | possibly damaging |
| rs7509382 | NP_543031 | S | Y | SY | possibly damaging |
| rs7509466 | NP_008817 | E | K | EK | benign            |
| rs7509902 | NP_006022 | T | S | TS | benign            |
| rs7509970 | NP_941967 | Y | C | YC | benign            |
| rs7510469 | XP_375931 | T | M | TM | benign            |
| rs7510719 | NP_001987 | V | D | VD | possibly damaging |
| rs7510719 | NP_006476 | V | D | VD | probably damaging |
| rs7510719 | NP_006477 | V | D | VD | probably damaging |
| rs7510719 | NP_006478 | V | D | VD | probably damaging |
| rs7511038 | NP_003495 | H | R | HR | possibly damaging |
| rs7511294 | NP_036539 | D | V | DV | possibly damaging |
| rs7511430 | XP_038520 | Q | H | QH | possibly damaging |
| rs7511651 | XP_371222 | R | C | RC | possibly damaging |
| rs7512553 | XP_048104 | Y | H | YH | possibly damaging |
| rs7512625 | NP_060557 | D | H | DH | possibly damaging |
| rs7512857 | XP_048104 | S | A | SA | benign            |



|           |           |   |   |    |                   |
|-----------|-----------|---|---|----|-------------------|
| rs7512943 | NP_003259 | L | F | LF | benign            |
| rs7513609 | XP_208234 | Q | E | QE | benign            |
| rs7514102 | NP_115790 | V | I | VI | benign            |
| rs7516785 | NP_001516 | R | Q | RQ | benign            |
| rs7516919 | NP_065859 | M | L | ML | benign            |
| rs7518080 | XP_378901 | R | H | RH | benign            |
| rs7518979 | NP_689704 | I | T | IT | benign            |
| rs7519660 | NP_005738 | H | N | HN | possibly damaging |
| rs7520249 | XP_373868 | D | N | DN | benign            |
| rs7520375 | XP_373868 | R | Q | RQ | benign            |
| rs7520509 | XP_497697 | D | E | DE | benign            |
| rs7520704 | NP_004111 | S | G | SG | benign            |
| rs7521578 | XP_060957 | T | I | TI | possibly damaging |
| rs7522061 | NP_443171 | N | D | ND | benign            |
| rs7522194 | NP_149118 | Q | H | QH | possibly damaging |
| rs7522332 | XP_371230 | H | R | HR | possibly damaging |
| rs7522925 | XP_048104 | A | V | AV | benign            |
| rs7523466 | XP_034086 | D | G | DG | possibly damaging |
| rs7523552 | XP_034086 | N | Y | NY | probably damaging |
| rs7524148 | NP_001432 | A | T | AT | probably damaging |
| rs7524261 | NP_000072 | L | V | LV | benign            |
| rs7524529 | XP_497745 | A | T | AT | benign            |
| rs7525401 | XP_371340 | C | R | CR | probably damaging |
| rs7525482 | XP_496394 | E | V | EV | possibly damaging |
| rs7525572 | XP_496365 | L | W | LW | benign            |
| rs7525705 | NP_064512 | S | N | SN | benign            |
| rs7526045 | XP_496394 | R | Q | RQ | benign            |
| rs7526132 | NP_857595 | A | G | AG | benign            |
| rs7526621 | XP_496691 | E | D | ED | benign            |
| rs7526769 | NP_001550 | T | I | TI | possibly damaging |
| rs7526812 | NP_115667 | R | K | RK | benign            |
| rs7527017 | NP_005003 | M | T | MT | benign            |
| rs7528067 | NP_079341 | M | I | MI | benign            |
| rs7528153 | NP_006104 | S | T | ST | benign            |
| rs7528360 | NP_653300 | M | I | MI | benign            |
| rs7528405 | NP_031378 | R | W | RW | benign            |
| rs7528827 | NP_060606 | H | R | HR | probably damaging |
| rs7529463 | NP_002996 | R | H | RH | possibly damaging |
| rs7530018 | XP_048104 | A | G | AG | benign            |
| rs7530267 | XP_375869 | D | A | DA | benign            |
| rs7530511 | NP_653302 | L | P | LP | probably damaging |
| rs7531012 | XP_371338 | P | S | PS | probably damaging |
| rs7531852 | XP_497745 | E | G | EG | possibly damaging |
| rs7532025 | XP_372840 | V | M | VM | benign            |
| rs7532025 | XP_060417 | M | V | MV | probably damaging |
| rs7532285 | XP_378901 | Q | R | QR | benign            |

|           |           |   |   |    |                   |
|-----------|-----------|---|---|----|-------------------|
| rs7532463 | XP_371230 | S | T | ST | benign            |
| rs7532736 | XP_048104 | S | Y | SY | possibly damaging |
| rs7532933 | NP_689702 | I | T | IT | possibly damaging |
| rs7533345 | NP_055964 | E | K | EK | benign            |
| rs7533552 | NP_001843 | Q | R | QR | benign            |
| rs7535142 | NP_899228 | T | I | TI | benign            |
| rs7535524 | NP_003585 | K | R | KR | benign            |
| rs7535528 | NP_060686 | A | V | AV | benign            |
| rs7535533 | NP_853550 | I | V | IV | benign            |
| rs7535536 | XP_373868 | I | T | IT | benign            |
| rs7536086 | NP_000636 | G | R | GR | possibly damaging |
| rs7536086 | NP_000637 | G | R | GR | possibly damaging |
| rs7536086 | NP_000635 | G | R | GR | possibly damaging |
| rs7536561 | NP_203129 | N | S | NS | benign            |
| rs7536645 | NP_003559 | T | A | TA | benign            |
| rs7537147 | XP_378901 | R | C | RC | probably damaging |
| rs7537203 | NP_071394 | N | S | NS | benign            |
| rs7537937 | NP_004111 | P | A | PA | benign            |
| rs7538516 | XP_209234 | R | C | RC | probably damaging |
| rs7540123 | XP_378901 | Q | E | QE | benign            |
| rs7540883 | NP_998818 | A | G | AG | benign            |
| rs7541041 | NP_000072 | T | M | TM | benign            |
| rs7541738 | NP_940861 | E | D | ED | benign            |
| rs7542365 | NP_003559 | R | Q | RQ | benign            |
| rs7542609 | NP_071403 | E | D | ED | benign            |
| rs7542760 | NP_002635 | T | I | TI | possibly damaging |
| rs7545406 | XP_373868 | T | K | TK | benign            |
| rs7545520 | NP_005538 | V | L | VL | benign            |
| rs7545855 | NP_892017 | S | P | SP | benign            |
| rs7546186 | XP_048104 | S | T | ST | benign            |
| rs7546381 | NP_659414 | V | M | VM | benign            |
| rs7549352 | NP_653300 | V | M | VM | benign            |
| rs7549483 | XP_049695 | Q | H | QH | possibly damaging |
| rs7549921 | NP_001391 | P | R | PR | benign            |
| rs7550131 | XP_060952 | S | P | SP | possibly damaging |
| rs7550295 | NP_055759 | A | T | AT | benign            |
| rs7550323 | XP_497712 | Y | H | YH | possibly damaging |
| rs7550857 | NP_689698 | L | F | LF | benign            |
| rs7550997 | NP_073615 | A | T | AT | benign            |
| rs7551068 | NP_000293 | E | D | ED | benign            |
| rs7551108 | NP_060606 | T | S | TS | benign            |
| rs7551131 | NP_848622 | T | M | TM | benign            |
| rs7551175 | NP_000293 | A | T | AT | benign            |
| rs7551261 | NP_115704 | P | L | PL | probably damaging |
| rs7552286 | XP_034086 | V | L | VL | benign            |
| rs7552626 | XP_496343 | S | N | SN | benign            |

|           |           |   |   |    |                   |
|-----------|-----------|---|---|----|-------------------|
| rs7552626 | XP_496345 | S | N | SN | benign            |
| rs7553399 | XP_031401 | R | L | RL | benign            |
| rs7553628 | NP_003359 | A | T | AT | benign            |
| rs7553800 | NP_067649 | N | K | NK | possibly damaging |
| rs7555046 | NP_997197 | C | R | CR | probably damaging |
| rs7555310 | XP_372827 | V | A | VA | possibly damaging |
| rs7555330 | XP_497697 | I | T | IT | probably damaging |
| rs7555424 | XP_372827 | F | L | FL | probably damaging |
| rs7556132 | NP_002284 | V | I | VI | benign            |
| rs7556485 | NP_001769 | P | L | PL | probably damaging |
| rs7558074 | NP_056988 | T | K | TK | benign            |
| rs7558525 | XP_371605 | G | R | GR | possibly damaging |
| rs7559279 | NP_001622 | R | H | RH | benign            |
| rs7559772 | NP_620158 | R | K | RK | benign            |
| rs7560008 | NP_056472 | S | T | ST | benign            |
| rs7560008 | NP_775099 | S | T | ST | benign            |
| rs7560262 | NP_003194 | N | S | NS | benign            |
| rs7561584 | NP_775491 | M | L | ML | possibly damaging |
| rs7562391 | NP_115861 | D | E | DE | benign            |
| rs7562391 | NP_572028 | D | E | DE | benign            |
| rs7564067 | XP_209429 | V | A | VA | benign            |
| rs7564372 | NP_115589 | R | C | RC | possibly damaging |
| rs7565062 | NP_002967 | N | T | NT | benign            |
| rs7565275 | NP_000532 | I | V | IV | benign            |
| rs7566476 | XP_496553 | S | T | ST | benign            |
| rs7567833 | NP_954705 | H | R | HR | benign            |
| rs7567833 | NP_076932 | H | R | HR | benign            |
| rs7568529 | NP_722577 | H | Y | HY | benign            |
| rs7568553 | NP_063938 | A | G | AG | benign            |
| rs7570176 | XP_497871 | D | H | DH | possibly damaging |
| rs7570797 | NP_620414 | S | G | SG | benign            |
| rs7572392 | XP_371605 | V | G | VG | possibly damaging |
| rs7572799 | NP_976221 | V | I | VI | benign            |
| rs7572857 | NP_055962 | S | G | SG | benign            |
| rs7572946 | NP_061027 | L | F | LF | benign            |
| rs7574414 | NP_079071 | V | A | VA | benign            |
| rs7575451 | NP_004534 | P | A | PA | probably damaging |
| rs7576247 | NP_004291 | Q | R | QR | benign            |
| rs7576247 | NP_009030 | Q | R | QR | benign            |
| rs7578199 | NP_976221 | N | S | NS | benign            |
| rs7578597 | NP_940956 | T | A | TA | benign            |
| rs7578597 | NP_071348 | T | A | TA | benign            |
| rs7578912 | NP_919288 | R | Q | RQ | benign            |
| rs7580167 | XP_496601 | I | V | IV | benign            |
| rs7580439 | NP_056477 | V | L | VL | benign            |
| rs7580926 | NP_079295 | Q | K | QK | benign            |

|           |           |   |   |    |                   |
|-----------|-----------|---|---|----|-------------------|
| rs7582826 | NP_071769 | D | H | DH | benign            |
| rs7584376 | XP_371605 | P | H | PH | probably damaging |
| rs7586984 | NP_006498 | R | H | RH | possibly damaging |
| rs7587534 | NP_659429 | K | R | KR | benign            |
| rs7588124 | NP_057336 | T | N | TN | benign            |
| rs7588159 | XP_496606 | I | T | IT | possibly damaging |
| rs7588635 | NP_006334 | A | T | AT | benign            |
| rs7588682 | XP_371534 | H | N | HN | benign            |
| rs7589195 | XP_092553 | V | L | VL | benign            |
| rs7590429 | NP_612411 | P | S | PS | possibly damaging |
| rs7590838 | NP_064528 | G | A | GA | benign            |
| rs7591107 | XP_496606 | I | T | IT | possibly damaging |
| rs7591371 | NP_005406 | K | T | KT | benign            |
| rs7591849 | NP_689741 | S | R | SR | benign            |
| rs7592352 | NP_002185 | T | A | TA | benign            |
| rs7592429 | NP_079029 | A | T | AT | benign            |
| rs7593622 | NP_057737 | R | W | RW | probably damaging |
| rs7594480 | NP_660302 | I | V | IV | benign            |
| rs7594481 | XP_092553 | L | P | LP | probably damaging |
| rs7594497 | NP_149100 | N | D | ND | benign            |
| rs7594971 | NP_079295 | R | C | RC | benign            |
| rs7595010 | NP_079029 | K | R | KR | benign            |
| rs7597367 | NP_057594 | K | E | KE | benign            |
| rs7598922 | NP_945314 | N | S | NS | benign            |
| rs7601000 | NP_037457 | L | Q | LQ | benign            |
| rs7601000 | NP_847896 | L | Q | LQ | benign            |
| rs7601049 | NP_659429 | V | L | VL | benign            |
| rs7601509 | NP_116107 | A | S | AS | benign            |
| rs7601771 | XP_371487 | H | D | HD | possibly damaging |
| rs7602159 | NP_620159 | T | P | TP | benign            |
| rs7602744 | NP_620154 | R | Q | RQ | benign            |
| rs7604639 | NP_006334 | R | K | RK | benign            |
| rs7607246 | XP_496606 | N | S | NS | benign            |
| rs7607759 | NP_075571 | T | A | TA | benign            |
| rs7607980 | NP_055715 | N | D | ND | benign            |
| rs7608121 | NP_115519 | R | Q | RQ | benign            |
| rs7610425 | XP_374057 | S | G | SG | benign            |
| rs7610574 | NP_112146 | I | T | IT | benign            |
| rs7612972 | NP_002069 | R | Q | RQ | benign            |
| rs7614751 | NP_653319 | R | G | RG | possibly damaging |
| rs7614835 | NP_000304 | R | L | RL | probably damaging |
| rs7615357 | XP_171032 | S | L | SL | possibly damaging |
| rs7616879 | XP_371668 | T | K | TK | benign            |
| rs7617376 | XP_377820 | P | H | PH | possibly damaging |
| rs7617704 | NP_003289 | F | L | FL | benign            |
| rs7618609 | NP_078937 | F | S | FS | benign            |

|           |           |   |   |    |                   |
|-----------|-----------|---|---|----|-------------------|
| rs7618988 | XP_371668 | R | Q | RQ | benign            |
| rs7619322 | NP_849144 | Y | D | YD | probably damaging |
| rs7619912 | NP_060608 | K | R | KR | benign            |
| rs7621322 | NP_996846 | D | G | DG | possibly damaging |
| rs7622799 | NP_004982 | P | S | PS | benign            |
| rs7623258 | NP_003839 | R | W | RW | possibly damaging |
| rs7624011 | NP_849144 | H | Y | HY | benign            |
| rs7624748 | XP_371661 | P | A | PA | benign            |
| rs7624750 | NP_570847 | N | S | NS | benign            |
| rs7624750 | NP_570849 | N | S | NS | benign            |
| rs7624750 | NP_570850 | N | S | NS | benign            |
| rs7624750 | NP_056375 | N | S | NS | benign            |
| rs7625806 | NP_031361 | L | R | LR | benign            |
| rs7625806 | NP_031363 | L | R | LR | benign            |
| rs7625806 | NP_031364 | L | R | LR | benign            |
| rs7625806 | NP_031362 | L | R | LR | benign            |
| rs7626962 | NP_932173 | S | Y | SY | benign            |
| rs7626962 | NP_000326 | S | Y | SY | possibly damaging |
| rs7627615 | NP_872395 | A | T | AT | benign            |
| rs7627924 | NP_689886 | C | S | CS | probably damaging |
| rs7628051 | NP_079199 | A | T | AT | benign            |
| rs7628349 | XP_371668 | N | S | NS | benign            |
| rs7628368 | NP_056227 | S | P | SP | possibly damaging |
| rs7630214 | NP_055951 | P | A | PA | possibly damaging |
| rs7630989 | NP_006505 | S | P | SP | benign            |
| rs7632072 | XP_291055 | T | A | TA | benign            |
| rs7632885 | NP_071414 | I | V | IV | benign            |
| rs7633228 | NP_000149 | T | A | TA | benign            |
| rs7633387 | NP_055508 | H | Y | HY | benign            |
| rs7633387 | NP_115707 | Y | H | YH | benign            |
| rs7633550 | NP_001613 | V | L | VL | benign            |
| rs7633797 | XP_114301 | L | P | LP | probably damaging |
| rs7634545 | NP_003140 | N | S | NS | benign            |
| rs7634846 | NP_870989 | I | V | IV | benign            |
| rs7634846 | NP_870990 | I | V | IV | benign            |
| rs7634846 | NP_000835 | I | V | IV | benign            |
| rs7635190 | XP_171032 | V | M | VM | benign            |
| rs7636593 | XP_371619 | G | R | GR | possibly damaging |
| rs7637065 | NP_284941 | R | P | RP | possibly damaging |
| rs7637099 | NP_000395 | L | P | LP | benign            |
| rs7637330 | NP_060397 | G | R | GR | probably damaging |
| rs7637330 | NP_284941 | G | R | GR | probably damaging |
| rs7637863 | NP_000331 | P | L | PL | benign            |
| rs7639705 | NP_055893 | I | L | IL | benign            |
| rs7641243 | NP_620162 | N | S | NS | benign            |
| rs7642448 | NP_877575 | E | Q | EQ | benign            |

|           |           |   |   |    |                   |
|-----------|-----------|---|---|----|-------------------|
| rs7642448 | NP_667340 | E | Q | EQ | benign            |
| rs7643864 | XP_498938 | N | K | NK | benign            |
| rs7645550 | NP_055222 | A | T | AT | benign            |
| rs7645550 | NP_741979 | A | T | AT | benign            |
| rs7645550 | NP_741980 | A | T | AT | benign            |
| rs7645550 | NP_741981 | A | T | AT | benign            |
| rs7645635 | NP_005569 | Y | H | YH | possibly damaging |
| rs7645720 | XP_374057 | R | W | RW | benign            |
| rs7647642 | NP_705615 | S | T | ST | benign            |
| rs7647642 | NP_705616 | S | T | ST | benign            |
| rs7648496 | NP_065941 | K | R | KR | benign            |
| rs7649715 | NP_056241 | T | M | TM | possibly damaging |
| rs7651620 | NP_000852 | G | E | GE | possibly damaging |
| rs7651738 | XP_498938 | V | I | VI | benign            |
| rs7652177 | NP_073600 | S | T | ST | benign            |
| rs7653405 | XP_376653 | G | R | GR | possibly damaging |
| rs7653897 | NP_938022 | A | V | AV | benign            |
| rs7654193 | NP_777612 | K | R | KR | benign            |
| rs7654410 | XP_094074 | E | K | EK | benign            |
| rs7654853 | NP_005949 | I | T | IT | possibly damaging |
| rs7655268 | XP_497982 | I | V | IV | benign            |
| rs7657817 | XP_376328 | V | I | VI | benign            |
| rs7658300 | NP_003319 | H | R | HR | benign            |
| rs7660807 | NP_997722 | N | S | NS | benign            |
| rs7662013 | XP_496725 | R | G | RG | probably damaging |
| rs7665271 | NP_689831 | S | T | ST | benign            |
| rs7666143 | NP_068746 | I | V | IV | benign            |
| rs7666283 | NP_060109 | V | I | VI | benign            |
| rs7666425 | NP_060203 | C | R | CR | probably damaging |
| rs7669418 | NP_056011 | I | V | IV | benign            |
| rs7670111 | XP_093839 | I | V | IV | benign            |
| rs7671168 | NP_056002 | P | S | PS | possibly damaging |
| rs7671281 | NP_114095 | I | T | IT | benign            |
| rs7672073 | XP_044178 | R | P | RP | benign            |
| rs7672707 | NP_849155 | V | A | VA | benign            |
| rs7672710 | NP_849155 | I | T | IT | benign            |
| rs7673905 | NP_149991 | E | D | ED | benign            |
| rs7675987 | NP_689753 | L | S | LS | benign            |
| rs7676916 | NP_689611 | R | Q | RQ | benign            |
| rs7677237 | XP_496710 | M | T | MT | possibly damaging |
| rs7679116 | NP_060785 | S | G | SG | benign            |
| rs7679116 | NP_361014 | S | G | SG | benign            |
| rs7679941 | NP_002917 | I | V | IV | benign            |
| rs7679941 | NP_937872 | I | V | IV | benign            |
| rs7679941 | NP_940834 | I | V | IV | benign            |
| rs7682260 | NP_002090 | S | L | SL | benign            |

|           |           |   |   |    |                   |
|-----------|-----------|---|---|----|-------------------|
| rs7682296 | NP_065926 | Y | H | YH | benign            |
| rs7682296 | NP_116252 | Y | H | YH | benign            |
| rs7682296 | NP_996672 | Y | H | YH | benign            |
| rs7683838 | NP_065186 | C | R | CR | probably damaging |
| rs7686065 | XP_496715 | R | Q | RQ | benign            |
| rs7687256 | NP_002090 | G | E | GE | benign            |
| rs7687296 | NP_001319 | V | L | VL | benign            |
| rs7688262 | NP_001064 | R | Q | RQ | benign            |
| rs7689099 | NP_060718 | P | R | PR | probably damaging |
| rs7689147 | XP_094074 | K | Q | KQ | benign            |
| rs7689316 | XP_497979 | G | S | GS | benign            |
| rs7689418 | NP_005029 | L | I | LI | benign            |
| rs7690296 | NP_006448 | T | A | TA | benign            |
| rs7690464 | NP_006448 | P | S | PS | probably damaging |
| rs7693453 | NP_733828 | C | S | CS | probably damaging |
| rs7696816 | NP_060862 | N | S | NS | benign            |
| rs7697037 | NP_001064 | C | R | CR | probably damaging |
| rs7697482 | NP_001064 | S | P | SP | benign            |
| rs7698598 | XP_050219 | T | A | TA | benign            |
| rs7698628 | NP_004675 | A | D | AD | benign            |
| rs7698680 | NP_689988 | L | M | LM | benign            |
| rs7699637 | NP_065926 | P | S | PS | possibly damaging |
| rs7699637 | NP_116252 | P | S | PS | possibly damaging |
| rs7699637 | NP_996672 | P | S | PS | possibly damaging |
| rs7699687 | NP_689988 | P | Q | PQ | benign            |
| rs7700801 | NP_005500 | I | M | IM | benign            |
| rs7700833 | NP_061993 | A | V | AV | possibly damaging |
| rs7700858 | NP_061993 | L | M | LM | benign            |
| rs7701579 | NP_490645 | T | M | TM | possibly damaging |
| rs7701579 | NP_114139 | T | M | TM | possibly damaging |
| rs7701755 | NP_061729 | S | I | SI | benign            |
| rs7701755 | NP_113685 | S | I | SI | probably damaging |
| rs7703823 | XP_498012 | A | T | AT | benign            |
| rs7705355 | NP_872438 | I | T | IT | possibly damaging |
| rs7705437 | NP_055059 | T | M | TM | possibly damaging |
| rs7706614 | NP_057688 | S | N | SN | benign            |
| rs7707147 | NP_699204 | H | R | HR | benign            |
| rs7709485 | NP_919227 | L | V | LV | benign            |
| rs7709578 | NP_060899 | R | S | RS | benign            |
| rs7710284 | NP_079143 | N | K | NK | benign            |
| rs7713638 | NP_000347 | A | V | AV | benign            |
| rs7713676 | NP_919227 | A | V | AV | benign            |
| rs7714670 | XP_371755 | W | R | WR | probably damaging |
| rs7715021 | NP_006042 | G | R | GR | possibly damaging |
| rs7715021 | NP_573418 | G | R | GR | possibly damaging |
| rs7715021 | NP_573420 | G | R | GR | possibly damaging |

|           |           |   |   |    |                   |
|-----------|-----------|---|---|----|-------------------|
| rs7715021 | NP_573419 | G | R | GR | possibly damaging |
| rs7715021 | NP_573421 | G | R | GR | possibly damaging |
| rs7715021 | NP_573422 | G | R | GR | probably damaging |
| rs7715491 | NP_115976 | R | K | RK | benign            |
| rs7718054 | NP_001438 | R | Q | RQ | benign            |
| rs7718102 | XP_094581 | S | G | SG | benign            |
| rs7718997 | XP_209700 | R | H | RH | possibly damaging |
| rs7719346 | NP_071423 | H | Y | HY | possibly damaging |
| rs7720149 | NP_001436 | L | H | LH | benign            |
| rs7720480 | NP_071916 | D | N | DN | benign            |
| rs7722711 | NP_006624 | V | A | VA | benign            |
| rs7723543 | XP_498018 | G | V | GV | probably damaging |
| rs7724813 | NP_079126 | E | K | EK | benign            |
| rs7724840 | XP_293886 | A | V | AV | benign            |
| rs7726005 | NP_002397 | R | Q | RQ | benign            |
| rs7726604 | NP_932079 | S | R | SR | possibly damaging |
| rs7726604 | NP_006698 | S | R | SR | possibly damaging |
| rs7726607 | NP_932079 | P | A | PA | possibly damaging |
| rs7726607 | NP_006698 | P | A | PA | possibly damaging |
| rs7726888 | XP_016532 | E | G | EG | probably damaging |
| rs7727472 | NP_113683 | P | T | PT | probably damaging |
| rs7727472 | NP_113684 | P | T | PT | probably damaging |
| rs7727472 | NP_061728 | P | T | PT | probably damaging |
| rs7727919 | XP_376436 | R | G | RG | possibly damaging |
| rs7728621 | NP_076996 | N | D | ND | benign            |
| rs7728667 | NP_872438 | C | S | CS | benign            |
| rs7729440 | XP_498024 | V | A | VA | benign            |
| rs7729559 | XP_498024 | V | I | VI | benign            |
| rs7730357 | NP_490645 | N | D | ND | benign            |
| rs7730357 | NP_114139 | N | D | ND | benign            |
| rs7731123 | XP_209719 | D | H | DH | benign            |
| rs7731327 | NP_113685 | P | Q | PQ | benign            |
| rs7731327 | NP_061729 | P | Q | PQ | benign            |
| rs7731453 | NP_036617 | L | I | LI | benign            |
| rs7731453 | NP_036616 | L | I | LI | benign            |
| rs7732671 | NP_573570 | A | P | AP | benign            |
| rs7732714 | XP_371776 | S | R | SR | benign            |
| rs7733604 | NP_001275 | P | L | PL | probably damaging |
| rs7734523 | XP_371783 | G | V | GV | probably damaging |
| rs7734523 | NP_775934 | G | V | GV | probably damaging |
| rs7735338 | NP_005860 | P | A | PA | benign            |
| rs7736541 | NP_061739 | A | V | AV | benign            |
| rs7736541 | NP_114400 | A | V | AV | possibly damaging |
| rs7736723 | NP_940969 | M | V | MV | benign            |
| rs7737306 | NP_057724 | V | I | VI | benign            |
| rs7737542 | NP_588612 | T | N | TN | benign            |



|           |           |   |   |    |                   |
|-----------|-----------|---|---|----|-------------------|
| rs7737765 | NP_036466 | Y | H | YH | possibly damaging |
| rs7738586 | XP_498091 | R | S | RS | benign            |
| rs7739323 | NP_944602 | V | M | VM | benign            |
| rs7739897 | NP_061847 | V | I | VI | benign            |
| rs7741152 | NP_598000 | G | D | GD | benign            |
| rs7742632 | NP_115859 | L | I | LI | benign            |
| rs7742662 | NP_598000 | L | F | LF | benign            |
| rs7743647 | NP_004188 | A | V | AV | benign            |
| rs7743647 | NP_115830 | A | V | AV | benign            |
| rs7744163 | NP_004743 | G | S | GS | benign            |
| rs7744717 | NP_872358 | K | N | KN | benign            |
| rs7744845 | XP_371838 | K | E | KE | benign            |
| rs7745236 | NP_001709 | Q | E | QE | benign            |
| rs7745238 | NP_076923 | G | D | GD | possibly damaging |
| rs7746261 | NP_003135 | S | L | SL | benign            |
| rs7747479 | NP_060404 | G | V | GV | benign            |
| rs7747948 | XP_291154 | P | L | PL | benign            |
| rs7749199 | NP_663779 | T | M | TM | benign            |
| rs7750596 | XP_166443 | R | Q | RQ | benign            |
| rs7750799 | XP_168055 | Q | L | QL | possibly damaging |
| rs7750940 | NP_006819 | N | S | NS | benign            |
| rs7751028 | NP_006772 | G | V | GV | probably damaging |
| rs7751270 | NP_036523 | R | C | RC | benign            |
| rs7755960 | XP_166372 | S | Y | SY | possibly damaging |
| rs7756880 | XP_371846 | E | D | ED | benign            |
| rs7756884 | XP_371846 | S | G | SG | possibly damaging |
| rs7757150 | NP_787118 | S | C | SC | benign            |
| rs7757931 | NP_006389 | C | F | CF | probably damaging |
| rs7760248 | NP_000829 | R | K | RK | benign            |
| rs7760374 | XP_498157 | E | V | EV | benign            |
| rs7760656 | XP_498064 | M | K | MK | possibly damaging |
| rs7761137 | NP_008989 | S | N | SN | benign            |
| rs7761731 | NP_057677 | N | K | NK | benign            |
| rs7762875 | NP_620306 | L | H | LH | benign            |
| rs7762875 | NP_005933 | L | H | LH | benign            |
| rs7762875 | NP_005934 | L | H | LH | benign            |
| rs7763565 | NP_036309 | L | F | LF | benign            |
| rs7763726 | XP_027658 | T | A | TA | benign            |
| rs7764091 | NP_065073 | S | A | SA | benign            |
| rs7764472 | NP_003313 | R | T | RT | benign            |
| rs7766366 | NP_619639 | T | A | TA | benign            |
| rs7766366 | NP_733842 | T | A | TA | benign            |
| rs7767176 | NP_036499 | V | I | VI | benign            |
| rs7767260 | NP_542171 | R | H | RH | benign            |
| rs7768224 | NP_064570 | R | H | RH | possibly damaging |
| rs7769409 | NP_000491 | R | W | RW | probably damaging |

|           |           |   |   |    |                   |
|-----------|-----------|---|---|----|-------------------|
| rs7769543 | NP_065121 | M | L | ML | benign            |
| rs7769759 | NP_937796 | T | I | TI | benign            |
| rs7770402 | XP_373109 | E | A | EA | benign            |
| rs7770412 | XP_371813 | A | V | AV | benign            |
| rs7771473 | NP_057461 | E | K | EK | benign            |
| rs7773345 | NP_006819 | Y | C | YC | possibly damaging |
| rs7774330 | NP_055595 | S | G | SG | benign            |
| rs7774845 | XP_498157 | V | L | VL | benign            |
| rs7775119 | NP_892006 | S | T | ST | benign            |
| rs7775397 | NP_006772 | K | Q | KQ | benign            |
| rs7776970 | XP_166532 | R | H | RH | benign            |
| rs7777835 | XP_166571 | K | E | KE | benign            |
| rs7779807 | XP_168530 | P | A | PA | probably damaging |
| rs7780712 | XP_374653 | C | R | CR | probably damaging |
| rs7780723 | XP_374653 | I | T | IT | benign            |
| rs7783247 | XP_373223 | I | M | IM | benign            |
| rs7783385 | XP_373223 | P | A | PA | possibly damaging |
| rs7783862 | NP_612503 | Y | H | YH | possibly damaging |
| rs7784276 | XP_373223 | A | T | AT | benign            |
| rs7785206 | NP_066974 | V | L | VL | benign            |
| rs7785290 | XP_376576 | K | R | KR | benign            |
| rs7787378 | XP_069621 | R | C | RC | possibly damaging |
| rs7787814 | NP_997225 | I | V | IV | benign            |
| rs7789030 | XP_376724 | A | V | AV | benign            |
| rs7789507 | NP_061955 | I | V | IV | benign            |
| rs7790381 | NP_932351 | F | L | FL | benign            |
| rs7790844 | XP_166571 | V | A | VA | benign            |
| rs7791608 | XP_374581 | H | R | HR | possibly damaging |
| rs7792133 | NP_000594 | R | H | RH | benign            |
| rs7792760 | XP_291223 | Q | R | QR | benign            |
| rs7792976 | NP_065779 | G | S | GS | benign            |
| rs7793098 | XP_498429 | S | W | SW | possibly damaging |
| rs7796289 | XP_374655 | K | Q | KQ | possibly damaging |
| rs7796589 | NP_872440 | M | V | MV | probably damaging |
| rs7797639 | XP_371954 | P | S | PS | probably damaging |
| rs7797657 | NP_689995 | L | V | LV | benign            |
| rs7798381 | NP_114111 | R | W | RW | possibly damaging |
| rs7798643 | NP_689957 | A | V | AV | benign            |
| rs7800072 | NP_689967 | K | Q | KQ | benign            |
| rs7800847 | XP_069612 | R | W | RW | possibly damaging |
| rs7801492 | NP_036304 | R | H | RH | benign            |
| rs7801492 | NP_277041 | R | H | RH | benign            |
| rs7801819 | NP_002702 | C | Y | CY | probably damaging |
| rs7802775 | XP_373223 | I | T | IT | benign            |
| rs7802789 | XP_373223 | V | A | VA | benign            |
| rs7802935 | XP_373223 | W | R | WR | benign            |

|           |           |   |   |    |                   |
|-----------|-----------|---|---|----|-------------------|
| rs7803620 | NP_079064 | R | S | RS | possibly damaging |
| rs7804532 | XP_295195 | A | G | AG | benign            |
| rs7805950 | NP_659469 | M | I | MI | benign            |
| rs7806476 | XP_374461 | N | D | ND | possibly damaging |
| rs7807049 | XP_039393 | Q | R | QR | benign            |
| rs7807821 | XP_498241 | A | V | AV | benign            |
| rs7808591 | XP_496882 | G | V | GV | probably damaging |
| rs7808646 | NP_073585 | G | S | GS | benign            |
| rs7809260 | NP_006015 | S | N | SN | benign            |
| rs7809374 | XP_496882 | L | F | LF | benign            |
| rs7809378 | XP_376679 | P | A | PA | probably damaging |
| rs7809379 | XP_376679 | P | Q | PQ | probably damaging |
| rs7809895 | XP_166571 | E | D | ED | benign            |
| rs7810767 | XP_371954 | E | Q | EQ | benign            |
| rs7811263 | NP_570115 | R | S | RS | benign            |
| rs7812024 | NP_006707 | P | R | PR | probably damaging |
| rs7812316 | NP_075568 | S | C | SC | benign            |
| rs7813215 | NP_001138 | V | I | VI | benign            |
| rs7813708 | NP_996889 | A | T | AT | benign            |
| rs7813708 | NP_116288 | A | T | AT | benign            |
| rs7814768 | NP_055080 | M | V | MV | benign            |
| rs7814768 | NP_068548 | M | V | MV | benign            |
| rs7814840 | NP_892121 | I | V | IV | benign            |
| rs7814840 | NP_056311 | I | V | IV | benign            |
| rs7815364 | NP_079427 | T | S | TS | benign            |
| rs7815455 | NP_877724 | S | N | SN | benign            |
| rs7815654 | NP_001106 | L | I | LI | benign            |
| rs7816413 | XP_372063 | R | W | RW | possibly damaging |
| rs7817179 | NP_079427 | T | M | TM | benign            |
| rs7817227 | XP_372035 | Q | R | QR | benign            |
| rs7819749 | NP_015628 | N | K | NK | benign            |
| rs7820062 | NP_803875 | T | R | TR | benign            |
| rs7820984 | NP_001907 | V | M | VM | benign            |
| rs7821248 | NP_001729 | A | V | AV | benign            |
| rs7822461 | NP_073586 | G | R | GR | possibly damaging |
| rs7823773 | NP_079107 | F | C | FC | probably damaging |
| rs7823979 | NP_570901 | E | K | EK | benign            |
| rs7824139 | NP_958728 | T | P | TP | benign            |
| rs7829386 | NP_003808 | I | V | IV | benign            |
| rs7829965 | NP_055080 | M | I | MI | benign            |
| rs7829965 | NP_068548 | M | I | MI | benign            |
| rs7830832 | NP_038460 | A | V | AV | benign            |
| rs7833924 | NP_958786 | S | P | SP | possibly damaging |
| rs7833924 | NP_958785 | S | P | SP | possibly damaging |
| rs7833924 | NP_958784 | S | P | SP | possibly damaging |
| rs7833924 | NP_958783 | S | P | SP | possibly damaging |

|           |           |   |   |    |                   |
|-----------|-----------|---|---|----|-------------------|
| rs7833924 | NP_958782 | S | P | SP | possibly damaging |
| rs7833924 | NP_958781 | S | P | SP | possibly damaging |
| rs7833924 | NP_958780 | S | P | SP | possibly damaging |
| rs7833924 | NP_000436 | S | P | SP | possibly damaging |
| rs7834525 | NP_004892 | E | K | EK | benign            |
| rs7835798 | NP_055569 | T | N | TN | benign            |
| rs7839771 | NP_066290 | R | H | RH | possibly damaging |
| rs7839934 | XP_372063 | L | V | LV | benign            |
| rs7841823 | XP_376787 | R | S | RS | possibly damaging |
| rs7843605 | NP_149047 | K | R | KR | benign            |
| rs7843605 | NP_908973 | K | R | KR | benign            |
| rs7843605 | NP_908974 | K | R | KR | benign            |
| rs7845453 | NP_954675 | A | T | AT | benign            |
| rs7845496 | NP_115872 | D | Y | DY | probably damaging |
| rs7845771 | NP_659441 | S | T | ST | benign            |
| rs7847165 | XP_497051 | K | Q | KQ | benign            |
| rs7847330 | XP_497051 | Q | H | QH | probably damaging |
| rs7847413 | XP_071099 | I | T | IT | benign            |
| rs7847896 | XP_034640 | S | N | SN | benign            |
| rs7848588 | NP_569726 | Y | C | YC | probably damaging |
| rs7850438 | NP_061871 | E | K | EK | benign            |
| rs7850844 | NP_000597 | G | D | GD | benign            |
| rs7851696 | NP_056652 | A | S | AS | benign            |
| rs7851696 | NP_004099 | A | S | AS | benign            |
| rs7852039 | NP_387504 | R | H | RH | benign            |
| rs7852247 | XP_379639 | R | C | RC | possibly damaging |
| rs7852247 | XP_499140 | R | C | RC | possibly damaging |
| rs7852261 | XP_379639 | T | M | TM | benign            |
| rs7852261 | XP_499140 | T | M | TM | benign            |
| rs7852399 | XP_372083 | F | Y | FY | benign            |
| rs7852858 | XP_071093 | P | L | PL | probably damaging |
| rs7853592 | XP_497051 | R | Q | RQ | benign            |
| rs7854303 | NP_079515 | S | F | SF | benign            |
| rs7854329 | NP_640339 | Y | H | YH | benign            |
| rs7854413 | NP_079515 | I | T | IT | benign            |
| rs7854621 | NP_067063 | N | T | NT | benign            |
| rs7854940 | XP_374297 | L | F | LF | benign            |
| rs7855532 | NP_006639 | D | E | DE | benign            |
| rs7856488 | NP_065975 | H | R | HR | probably damaging |
| rs7857490 | XP_171224 | V | M | VM | benign            |
| rs7858601 | XP_071099 | R | W | RW | probably damaging |
| rs7858997 | XP_498307 | W | S | WS | probably damaging |
| rs7859194 | NP_116263 | D | A | DA | benign            |
| rs7859962 | NP_002820 | F | L | FL | benign            |
| rs7863488 | NP_071935 | D | H | DH | benign            |
| rs7864351 | NP_055876 | E | D | ED | benign            |

|           |           |   |   |    |                   |
|-----------|-----------|---|---|----|-------------------|
| rs7864805 | XP_372133 | P | H | PH | probably damaging |
| rs7866127 | XP_497069 | E | D | ED | benign            |
| rs7867180 | NP_071935 | V | M | VM | benign            |
| rs7868609 | XP_041018 | R | S | RS | benign            |
| rs7869444 | NP_569075 | E | D | ED | benign            |
| rs7869444 | NP_569076 | E | D | ED | benign            |
| rs7869444 | NP_569077 | E | D | ED | benign            |
| rs7869444 | NP_002830 | E | D | ED | benign            |
| rs7871785 | NP_002790 | V | A | VA | benign            |
| rs7872077 | NP_006678 | V | M | VM | benign            |
| rs7873074 | NP_000709 | A | S | AS | benign            |
| rs7874348 | NP_872293 | A | T | AT | benign            |
| rs7874507 | NP_037522 | E | G | EG | possibly damaging |
| rs7875283 | XP_373322 | C | F | CF | probably damaging |
| rs7875294 | NP_060719 | N | I | NI | probably damaging |
| rs7875872 | NP_060264 | S | T | ST | benign            |
| rs7876511 | XP_374328 | A | E | AE | possibly damaging |
| rs7878409 | NP_002355 | T | A | TA | benign            |
| rs7878741 | NP_006141 | E | K | EK | benign            |
| rs7879053 | XP_498392 | P | S | PS | possibly damaging |
| rs7880436 | NP_116010 | N | D | ND | benign            |
| rs7880914 | XP_372200 | A | T | AT | benign            |
| rs7882107 | XP_377014 | N | D | ND | possibly damaging |
| rs7883913 | NP_001513 | R | Q | RQ | possibly damaging |
| rs7884806 | NP_997305 | T | I | TI | benign            |
| rs7885041 | NP_000197 | T | S | TS | benign            |
| rs7886232 | XP_498351 | A | V | AV | benign            |
| rs7886826 | NP_002901 | Q | R | QR | benign            |
| rs7887327 | XP_498351 | G | D | GD | possibly damaging |
| rs7887630 | XP_372257 | P | S | PS | probably damaging |
| rs7889330 | XP_291326 | E | G | EG | possibly damaging |
| rs7889678 | NP_004420 | T | M | TM | benign            |
| rs7889839 | XP_371326 | M | V | MV | benign            |
| rs7890126 | NP_004126 | V | I | VI | benign            |
| rs7894200 | NP_056467 | T | P | TP | possibly damaging |
| rs7894307 | XP_290463 | P | T | PT | possibly damaging |
| rs7894315 | NP_056467 | N | S | NS | benign            |
| rs7894545 | NP_056467 | R | G | RG | possibly damaging |
| rs7894865 | NP_004184 | V | M | VM | benign            |
| rs7895159 | NP_056467 | A | P | AP | benign            |
| rs7895372 | XP_167711 | V | L | VL | benign            |
| rs7895622 | NP_079165 | R | H | RH | benign            |
| rs7895850 | NP_055056 | K | E | KE | benign            |
| rs7896313 | NP_060079 | D | N | DN | benign            |
| rs7897309 | XP_374779 | Q | R | QR | benign            |
| rs7898873 | NP_001072 | T | S | TS | benign            |

|           |           |   |   |    |                   |
|-----------|-----------|---|---|----|-------------------|
| rs7899328 | NP_689938 | T | M | TM | possibly damaging |
| rs7899445 | NP_079406 | L | P | LP | possibly damaging |
| rs7900029 | XP_495845 | L | Q | LQ | benign            |
| rs7900149 | XP_495845 | L | P | LP | probably damaging |
| rs7900194 | NP_000762 | R | H | RH | benign            |
| rs7901604 | NP_004083 | I | T | IT | benign            |
| rs7901855 | XP_166132 | E | A | EA | possibly damaging |
| rs7901902 | NP_006205 | G | S | GS | possibly damaging |
| rs7902757 | NP_071407 | R | C | RC | possibly damaging |
| rs7902757 | NP_443068 | R | C | RC | possibly damaging |
| rs7903344 | NP_001269 | I | V | IV | benign            |
| rs7904300 | NP_689922 | A | T | AT | benign            |
| rs7905009 | NP_057149 | Y | H | YH | benign            |
| rs7905349 | NP_001072 | H | Y | HY | possibly damaging |
| rs7905784 | NP_877428 | T | S | TS | benign            |
| rs7905784 | NP_060988 | T | S | TS | benign            |
| rs7906894 | XP_497211 | G | R | GR | possibly damaging |
| rs7908745 | NP_659458 | H | Y | HY | possibly damaging |
| rs7909153 | NP_057196 | R | W | RW | probably damaging |
| rs7910140 | NP_078969 | T | A | TA | benign            |
| rs7912706 | NP_653191 | R | I | RI | probably damaging |
| rs7913176 | NP_940916 | V | I | VI | benign            |
| rs7914059 | NP_942090 | V | L | VL | benign            |
| rs7914192 | NP_872575 | E | D | ED | benign            |
| rs7914192 | NP_872577 | E | D | ED | benign            |
| rs7914192 | NP_000186 | E | D | ED | benign            |
| rs7914441 | NP_660289 | K | Q | KQ | benign            |
| rs7914594 | XP_495845 | R | W | RW | benign            |
| rs7914886 | XP_495845 | T | P | TP | benign            |
| rs7914982 | NP_008886 | H | R | HR | probably damaging |
| rs7916821 | NP_115967 | N | S | NS | benign            |
| rs7917267 | NP_899230 | R | Q | RQ | benign            |
| rs7917566 | XP_166132 | D | N | DN | benign            |
| rs7917573 | XP_166132 | E | D | ED | benign            |
| rs7918199 | NP_002408 | V | M | VM | benign            |
| rs7918487 | NP_835455 | S | P | SP | benign            |
| rs7918729 | NP_055287 | Q | K | QK | benign            |
| rs7918730 | NP_963858 | A | V | AV | benign            |
| rs7918730 | NP_570140 | A | V | AV | benign            |
| rs7918793 | NP_663736 | T | M | TM | benign            |
| rs7919507 | NP_056036 | N | K | NK | benign            |
| rs7920186 | NP_060546 | R | Q | RQ | benign            |
| rs7920896 | NP_996744 | P | L | PL | probably damaging |
| rs7921143 | NP_940979 | A | G | AG | benign            |
| rs7921306 | NP_003165 | I | V | IV | benign            |
| rs7921306 | NP_068506 | I | V | IV | benign            |

|           |           |   |   |    |                   |
|-----------|-----------|---|---|----|-------------------|
| rs7921386 | NP_002238 | A | D | AD | benign            |
| rs7922159 | NP_055287 | K | N | KN | benign            |
| rs7922946 | NP_060764 | R | Q | RQ | benign            |
| rs7924459 | XP_291980 | R | G | RG | benign            |
| rs7924553 | NP_003728 | V | I | VI | benign            |
| rs7924602 | NP_001095 | E | A | EA | probably damaging |
| rs7924754 | XP_372359 | D | E | DE | benign            |
| rs7926083 | XP_291981 | K | T | KT | possibly damaging |
| rs7926571 | NP_944605 | A | T | AT | benign            |
| rs7926667 | XP_035037 | L | S | LS | benign            |
| rs7926728 | XP_374927 | G | C | GC | probably damaging |
| rs7926767 | XP_291838 | R | K | RK | benign            |
| rs7926933 | XP_166227 | P | L | PL | probably damaging |
| rs7927108 | NP_056076 | S | R | SR | benign            |
| rs7927138 | NP_937828 | R | Q | RQ | benign            |
| rs7927196 | XP_372443 | T | A | TA | benign            |
| rs7927385 | XP_291838 | R | K | RK | benign            |
| rs7927496 | XP_370649 | R | K | RK | probably damaging |
| rs7928451 | XP_372373 | A | V | AV | benign            |
| rs7928649 | NP_057943 | W | R | WR | benign            |
| rs7930185 | XP_370616 | E | Q | EQ | benign            |
| rs7930678 | XP_166831 | F | L | FL | probably damaging |
| rs7931052 | XP_170658 | T | I | TI | possibly damaging |
| rs7931261 | XP_166831 | I | T | IT | benign            |
| rs7931269 | XP_170658 | T | I | TI | benign            |
| rs7932199 | XP_210184 | I | L | IL | benign            |
| rs7932708 | NP_473372 | R | C | RC | possibly damaging |
| rs7932738 | XP_210184 | F | V | FV | possibly damaging |
| rs7932976 | NP_683708 | V | I | VI | benign            |
| rs7932976 | NP_443119 | V | I | VI | benign            |
| rs7933549 | XP_210181 | S | L | SL | possibly damaging |
| rs7933772 | XP_166831 | S | G | SG | benign            |
| rs7933789 | XP_293565 | S | G | SG | benign            |
| rs7933807 | XP_372373 | V | G | VG | possibly damaging |
| rs7934079 | XP_291816 | A | P | AP | benign            |
| rs7934336 | XP_061676 | R | C | RC | probably damaging |
| rs7934670 | XP_372364 | F | I | FI | benign            |
| rs7934823 | NP_835462 | L | F | LF | benign            |
| rs7935144 | XP_372359 | R | C | RC | possibly damaging |
| rs7935175 | NP_056969 | Q | H | QH | benign            |
| rs7935453 | XP_084529 | L | V | LV | benign            |
| rs7935625 | XP_370665 | E | D | ED | benign            |
| rs7936020 | NP_065860 | A | T | AT | benign            |
| rs7936324 | XP_291816 | A | V | AV | benign            |
| rs7936354 | XP_291816 | P | L | PL | probably damaging |
| rs7936512 | XP_372361 | T | I | TI | benign            |

|           |           |   |   |    |                   |
|-----------|-----------|---|---|----|-------------------|
| rs7936660 | NP_958831 | D | H | DH | possibly damaging |
| rs7937237 | NP_149420 | S | C | SC | benign            |
| rs7937317 | XP_166781 | I | V | IV | benign            |
| rs7938203 | NP_110440 | R | T | RT | benign            |
| rs7938371 | NP_997069 | R | H | RH | benign            |
| rs7938382 | XP_290536 | S | A | SA | benign            |
| rs7938417 | NP_004715 | T | I | TI | possibly damaging |
| rs7938623 | NP_857634 | C | Y | CY | probably damaging |
| rs7938623 | NP_857635 | C | Y | CY | probably damaging |
| rs7938623 | NP_036226 | C | Y | CY | probably damaging |
| rs7939515 | XP_495873 | C | R | CR | possibly damaging |
| rs7939902 | XP_497309 | R | C | RC | probably damaging |
| rs7939917 | NP_110397 | V | M | VM | benign            |
| rs7940297 | NP_689529 | T | P | TP | benign            |
| rs7940667 | NP_976030 | V | G | VG | benign            |
| rs7940827 | XP_293565 | R | W | RW | possibly damaging |
| rs7941190 | XP_372411 | L | F | LF | benign            |
| rs7941404 | NP_079059 | R | H | RH | benign            |
| rs7941523 | NP_733746 | A | V | AV | benign            |
| rs7941731 | XP_061627 | I | T | IT | probably damaging |
| rs7942047 | XP_291838 | L | P | LP | possibly damaging |
| rs7943508 | NP_005152 | V | I | VI | benign            |
| rs7943698 | XP_372366 | F | Y | FY | benign            |
| rs7944051 | NP_002385 | P | S | PS | benign            |
| rs7944684 | NP_004202 | Y | F | YF | benign            |
| rs7945285 | NP_699178 | V | A | VA | benign            |
| rs7946182 | XP_370662 | R | H | RH | benign            |
| rs7947114 | XP_372418 | K | E | KE | benign            |
| rs7947230 | XP_084529 | N | H | NH | benign            |
| rs7947426 | XP_089863 | I | V | IV | benign            |
| rs7947432 | XP_089863 | I | V | IV | benign            |
| rs7947504 | NP_113638 | R | Q | RQ | benign            |
| rs7947619 | NP_113638 | M | I | MI | benign            |
| rs7947780 | NP_659455 | S | R | SR | benign            |
| rs7948009 | XP_372364 | R | C | RC | benign            |
| rs7948561 | XP_497280 | R | S | RS | benign            |
| rs7948629 | XP_166879 | Y | C | YC | possibly damaging |
| rs7948666 | NP_006682 | V | M | VM | benign            |
| rs7949157 | XP_061871 | Q | R | QR | benign            |
| rs7949377 | NP_835462 | K | M | KM | possibly damaging |
| rs7949430 | NP_006176 | V | M | VM | benign            |
| rs7949664 | XP_166871 | V | G | VG | possibly damaging |
| rs7949771 | NP_703145 | N | D | ND | benign            |
| rs7950082 | XP_372359 | Y | F | YF | probably damaging |
| rs7950441 | NP_060631 | Q | H | QH | probably damaging |
| rs7950873 | NP_057662 | S | P | SP | benign            |



|           |           |   |   |    |                   |
|-----------|-----------|---|---|----|-------------------|
| rs7951297 | NP_663626 | R | C | RC | benign            |
| rs7952293 | NP_149420 | R | C | RC | benign            |
| rs7953309 | NP_006602 | Q | R | QR | benign            |
| rs7954976 | NP_057377 | D | N | DN | benign            |
| rs7955371 | NP_061852 | S | C | SC | benign            |
| rs7955450 | NP_689648 | G | S | GS | benign            |
| rs7955866 | NP_065689 | T | M | TM | possibly damaging |
| rs7956250 | NP_003868 | E | G | EG | possibly damaging |
| rs7956679 | NP_036536 | L | F | LF | benign            |
| rs7957619 | NP_000422 | S | N | SN | benign            |
| rs7958174 | NP_778236 | R | Q | RQ | benign            |
| rs7958311 | NP_002553 | R | H | RH | benign            |
| rs7958316 | NP_002553 | R | H | RH | benign            |
| rs7958709 | NP_077288 | I | L | IL | benign            |
| rs7960087 | NP_004649 | V | L | VL | benign            |
| rs7960177 | XP_372447 | V | M | VM | possibly damaging |
| rs7961645 | NP_066276 | D | V | DV | benign            |
| rs7962217 | NP_000543 | G | R | GR | probably damaging |
| rs7963597 | NP_937883 | S | P | SP | benign            |
| rs7963597 | NP_002947 | S | P | SP | benign            |
| rs7963692 | NP_005466 | T | S | TS | benign            |
| rs7963792 | NP_005547 | R | W | RW | probably damaging |
| rs7965471 | NP_775813 | Q | P | QP | possibly damaging |
| rs7965804 | NP_110392 | R | Q | RQ | benign            |
| rs7966307 | NP_085911 | K | R | KR | benign            |
| rs7966313 | NP_612460 | L | V | LV | benign            |
| rs7966339 | NP_002291 | M | V | MV | benign            |
| rs7966369 | XP_372471 | R | W | RW | probably damaging |
| rs7967435 | XP_497333 | R | C | RC | benign            |
| rs7968222 | NP_055523 | K | N | KN | benign            |
| rs7968684 | XP_495917 | H | Q | HQ | benign            |
| rs7968829 | NP_003474 | G | R | GR | possibly damaging |
| rs7968961 | XP_495920 | V | L | VL | benign            |
| rs7969347 | NP_849148 | N | D | ND | benign            |
| rs7969410 | NP_036595 | R | Q | RQ | possibly damaging |
| rs7969705 | NP_113679 | E | Q | EQ | benign            |
| rs7969931 | NP_006143 | L | V | LV | benign            |
| rs7969937 | NP_997321 | D | E | DE | benign            |
| rs7970387 | XP_290559 | Q | E | QE | benign            |
| rs7971718 | XP_495917 | T | M | TM | benign            |
| rs7972242 | XP_290592 | K | Q | KQ | benign            |
| rs7972747 | NP_000880 | E | V | EV | possibly damaging |
| rs7972796 | NP_005466 | F | L | FL | benign            |
| rs7973658 | NP_060034 | R | H | RH | benign            |
| rs7973666 | XP_208658 | Q | R | QR | benign            |
| rs7974137 | NP_005529 | R | H | RH | benign            |

|           |           |   |   |    |                   |
|-----------|-----------|---|---|----|-------------------|
| rs7974426 | NP_859062 | L | V | LV | benign            |
| rs7975237 | NP_859075 | T | I | TI | benign            |
| rs7975614 | NP_002327 | V | I | VI | benign            |
| rs7978197 | NP_938079 | R | H | RH | probably damaging |
| rs7981609 | NP_076994 | R | H | RH | benign            |
| rs7984952 | NP_005791 | S | L | SL | benign            |
| rs7985433 | XP_208097 | V | A | VA | benign            |
| rs7985900 | XP_375027 | P | S | PS | benign            |
| rs7986131 | NP_005349 | M | T | MT | benign            |
| rs7987859 | XP_497370 | Y | H | YH | probably damaging |
| rs7988841 | NP_005349 | P | R | PR | probably damaging |
| rs7990167 | NP_898865 | V | E | VE | benign            |
| rs7990369 | NP_004120 | A | V | AV | benign            |
| rs7992146 | NP_000811 | G | R | GR | benign            |
| rs7993061 | XP_495963 | M | V | MV | benign            |
| rs7995033 | NP_004676 | V | I | VI | benign            |
| rs7996253 | XP_292193 | A | V | AV | benign            |
| rs7998427 | NP_114121 | G | E | GE | possibly damaging |
| rs8002697 | NP_699202 | S | P | SP | probably damaging |
| rs8002725 | NP_003834 | K | R | KR | benign            |
| rs8002725 | NP_659001 | K | R | KR | benign            |
| rs8004609 | NP_000701 | R | Q | RQ | benign            |
| rs8005245 | XP_372504 | K | N | KN | probably damaging |
| rs8005834 | XP_375067 | R | G | RG | benign            |
| rs8007859 | NP_060669 | Q | H | QH | possibly damaging |
| rs8008203 | XP_370756 | A | V | AV | benign            |
| rs8010237 | NP_008870 | H | Y | HY | possibly damaging |
| rs8010264 | NP_068355 | T | S | TS | benign            |
| rs8010264 | NP_006418 | T | S | TS | benign            |
| rs8010791 | NP_055565 | Q | H | QH | possibly damaging |
| rs8010888 | XP_377355 | T | A | TA | benign            |
| rs8010994 | NP_003804 | E | D | ED | benign            |
| rs8012891 | NP_002925 | H | Q | HQ | benign            |
| rs8013454 | XP_497418 | T | M | TM | benign            |
| rs8014119 | NP_775798 | G | A | GA | benign            |
| rs8014538 | NP_004230 | S | G | SG | possibly damaging |
| rs8017377 | XP_370756 | A | T | AT | benign            |
| rs8018720 | NP_006355 | L | V | LV | benign            |
| rs8019076 | NP_114120 | V | A | VA | benign            |
| rs8020032 | NP_009017 | F | L | FL | possibly damaging |
| rs8020529 | NP_689545 | S | N | SN | benign            |
| rs8022805 | NP_009041 | R | Q | RQ | benign            |
| rs8023621 | NP_001888 | R | H | RH | benign            |
| rs8023906 | NP_057216 | T | A | TA | benign            |
| rs8024644 | NP_112574 | K | R | KR | benign            |
| rs8024732 | NP_937784 | R | Q | RQ | benign            |

|           |           |   |   |    |                   |
|-----------|-----------|---|---|----|-------------------|
| rs8024962 | XP_375148 | A | T | AT | benign            |
| rs8024962 | XP_496031 | A | T | AT | benign            |
| rs8025153 | NP_004564 | R | H | RH | possibly damaging |
| rs8025811 | XP_370868 | P | L | PL | probably damaging |
| rs8026258 | XP_496026 | H | L | HL | probably damaging |
| rs8026929 | NP_073604 | S | C | SC | possibly damaging |
| rs8026956 | NP_060154 | T | A | TA | benign            |
| rs8027526 | NP_056355 | Q | E | QE | benign            |
| rs8027765 | NP_073604 | D | N | DN | benign            |
| rs8028305 | NP_054799 | R | H | RH | possibly damaging |
| rs8028332 | NP_057484 | S | P | SP | benign            |
| rs8029810 | NP_689549 | P | L | PL | benign            |
| rs8030576 | NP_057726 | Q | R | QR | benign            |
| rs8030584 | NP_057726 | Q | P | QP | benign            |
| rs8030587 | XP_031744 | R | H | RH | benign            |
| rs8030775 | NP_940844 | A | T | AT | benign            |
| rs8031218 | XP_031744 | T | I | TI | benign            |
| rs8032410 | NP_004127 | I | V | IV | benign            |
| rs8033825 | XP_370836 | C | S | CS | probably damaging |
| rs8034304 | XP_496055 | A | V | AV | benign            |
| rs8034304 | XP_496061 | A | V | AV | benign            |
| rs8034443 | NP_116191 | V | I | VI | benign            |
| rs8034735 | NP_057726 | H | R | HR | benign            |
| rs8035034 | XP_375147 | L | P | LP | possibly damaging |
| rs8035034 | XP_496030 | L | P | LP | possibly damaging |
| rs8035209 | XP_497455 | V | G | VG | possibly damaging |
| rs8035438 | XP_370848 | W | R | WR | probably damaging |
| rs8035931 | NP_976307 | V | L | VL | benign            |
| rs8036680 | XP_035527 | Q | R | QR | benign            |
| rs8037614 | NP_055141 | R | Q | RQ | possibly damaging |
| rs8037872 | XP_496026 | T | M | TM | benign            |
| rs8038017 | XP_375150 | E | V | EV | possibly damaging |
| rs8038741 | XP_496026 | M | I | MI | possibly damaging |
| rs8040502 | NP_733468 | G | R | GR | possibly damaging |
| rs8040502 | NP_653091 | G | R | GR | possibly damaging |
| rs8040712 | XP_370868 | F | V | FV | benign            |
| rs8040932 | NP_005494 | L | P | LP | probably damaging |
| rs8041035 | NP_061141 | T | M | TM | probably damaging |
| rs8041078 | NP_689662 | A | V | AV | benign            |
| rs8041089 | NP_689662 | A | V | AV | benign            |
| rs8041417 | NP_061141 | R | W | RW | probably damaging |
| rs8042811 | NP_775880 | C | R | CR | probably damaging |
| rs8042868 | NP_742095 | V | I | VI | benign            |
| rs8042868 | NP_742094 | V | I | VI | benign            |
| rs8042868 | NP_742093 | V | I | VI | benign            |
| rs8042868 | NP_473361 | V | I | VI | benign            |

|           |           |   |   |    |                   |
|-----------|-----------|---|---|----|-------------------|
| rs8043515 | NP_937784 | V | L | VL | benign            |
| rs8043587 | NP_054876 | D | E | DE | benign            |
| rs8043590 | NP_054876 | S | T | ST | benign            |
| rs8044843 | XP_290684 | D | G | DG | benign            |
| rs8045183 | NP_036492 | V | M | VM | benign            |
| rs8045850 | NP_071938 | V | M | VM | benign            |
| rs8046121 | NP_000237 | G | R | GR | possibly damaging |
| rs8046424 | NP_689669 | Q | E | QE | benign            |
| rs8046813 | NP_065998 | R | L | RL | benign            |
| rs8046978 | NP_078982 | A | V | AV | benign            |
| rs8047578 | XP_496156 | R | Q | RQ | benign            |
| rs8048197 | XP_496156 | L | P | LP | benign            |
| rs8048992 | NP_003357 | R | S | RS | benign            |
| rs8050758 | XP_034819 | P | A | PA | possibly damaging |
| rs8050871 | NP_008892 | Q | H | QH | possibly damaging |
| rs8050904 | NP_877417 | T | M | TM | possibly damaging |
| rs8050974 | NP_055529 | S | N | SN | benign            |
| rs8051801 | XP_091331 | C | S | CS | probably damaging |
| rs8052503 | NP_115909 | E | D | ED | benign            |
| rs8052579 | NP_004474 | L | S | LS | benign            |
| rs8052655 | NP_060766 | G | S | GS | benign            |
| rs8052713 | NP_006444 | E | Q | EQ | benign            |
| rs8055536 | NP_065998 | H | Q | HQ | benign            |
| rs8055741 | XP_498469 | G | S | GS | possibly damaging |
| rs8055886 | XP_498469 | P | L | PL | probably damaging |
| rs8055896 | XP_498469 | T | M | TM | possibly damaging |
| rs8055909 | NP_775747 | G | S | GS | benign            |
| rs8056684 | NP_116219 | R | H | RH | benign            |
| rs8056693 | NP_872423 | V | I | VI | benign            |
| rs8056709 | NP_443188 | I | V | IV | benign            |
| rs8056950 | XP_498469 | E | V | EV | probably damaging |
| rs8057331 | NP_063915 | T | M | TM | benign            |
| rs8057331 | NP_063953 | T | M | TM | benign            |
| rs8057331 | NP_063954 | T | M | TM | benign            |
| rs8057331 | NP_063955 | T | M | TM | benign            |
| rs8057331 | NP_063956 | T | M | TM | benign            |
| rs8057331 | NP_063957 | T | M | TM | benign            |
| rs8057331 | NP_004987 | T | M | TM | benign            |
| rs8057474 | NP_660188 | K | M | KM | benign            |
| rs8057474 | NP_660190 | K | M | KM | benign            |
| rs8057474 | NP_660191 | K | M | KM | benign            |
| rs8057474 | NP_150229 | K | M | KM | benign            |
| rs8058674 | NP_055529 | R | W | RW | possibly damaging |
| rs8058694 | NP_001162 | H | Q | HQ | possibly damaging |
| rs8059234 | XP_496156 | M | T | MT | benign            |
| rs8059252 | NP_079198 | I | V | IV | benign            |

|           |           |   |   |    |                   |
|-----------|-----------|---|---|----|-------------------|
| rs8059494 | XP_292504 | E | D | ED | benign            |
| rs8060046 | NP_000330 | R | K | RK | benign            |
| rs8060130 | NP_079056 | T | M | TM | benign            |
| rs8060294 | NP_877417 | L | S | LS | possibly damaging |
| rs8060532 | NP_055529 | A | V | AV | benign            |
| rs8061302 | NP_001442 | P | T | PT | possibly damaging |
| rs8062281 | XP_370944 | H | L | HL | probably damaging |
| rs8062344 | NP_060358 | P | R | PR | probably damaging |
| rs8062558 | NP_115909 | R | G | RG | possibly damaging |
| rs8063446 | NP_115554 | S | A | SA | benign            |
| rs8063727 | NP_002696 | R | Q | RQ | benign            |
| rs8063774 | XP_496156 | Q | R | QR | possibly damaging |
| rs8064455 | NP_115509 | E | D | ED | benign            |
| rs8064529 | NP_997229 | V | A | VA | benign            |
| rs8064625 | NP_065138 | R | Q | RQ | benign            |
| rs8064733 | XP_496218 | W | R | WR | probably damaging |
| rs8065506 | NP_065838 | N | K | NK | benign            |
| rs8065854 | NP_000864 | A | T | AT | benign            |
| rs8065903 | NP_073738 | K | R | KR | benign            |
| rs8066242 | NP_659505 | V | M | VM | benign            |
| rs8066269 | NP_938190 | A | S | AS | benign            |
| rs8066269 | NP_938191 | A | S | AS | benign            |
| rs8066269 | NP_938192 | A | S | AS | benign            |
| rs8066269 | NP_938193 | A | S | AS | benign            |
| rs8066269 | NP_938194 | A | S | AS | benign            |
| rs8066269 | NP_938196 | A | S | AS | benign            |
| rs8066269 | NP_938197 | A | S | AS | benign            |
| rs8066269 | NP_938198 | A | S | AS | benign            |
| rs8066269 | NP_938199 | A | S | AS | benign            |
| rs8066269 | NP_938200 | A | S | AS | benign            |
| rs8066269 | NP_938201 | A | S | AS | benign            |
| rs8066269 | NP_938202 | A | S | AS | benign            |
| rs8066269 | NP_938406 | A | S | AS | benign            |
| rs8066269 | NP_061496 | A | S | AS | benign            |
| rs8067409 | XP_045581 | V | I | VI | benign            |
| rs8068049 | NP_060875 | G | S | GS | benign            |
| rs8068240 | NP_060619 | P | L | PL | probably damaging |
| rs8068464 | XP_496245 | R | H | RH | benign            |
| rs8068664 | NP_703147 | M | I | MI | possibly damaging |
| rs8069305 | XP_497550 | G | V | GV | probably damaging |
| rs8069315 | NP_064547 | R | C | RC | probably damaging |
| rs8069344 | NP_000171 | L | H | LH | probably damaging |
| rs8069375 | NP_055151 | T | I | TI | benign            |
| rs8069834 | NP_002463 | W | R | WR | benign            |
| rs8069943 | NP_003762 | Q | R | QR | benign            |
| rs8070501 | NP_001363 | R | W | RW | probably damaging |

|           |           |   |   |    |                   |
|-----------|-----------|---|---|----|-------------------|
| rs8071056 | NP_079203 | H | Q | HQ | possibly damaging |
| rs8071215 | NP_057197 | N | S | NS | benign            |
| rs8072048 | NP_112584 | R | Q | RQ | benign            |
| rs8072110 | NP_787098 | D | E | DE | benign            |
| rs8072110 | NP_078924 | D | E | DE | benign            |
| rs8072406 | NP_005984 | G | V | GV | benign            |
| rs8072430 | NP_663327 | R | W | RW | benign            |
| rs8072430 | NP_003684 | R | W | RW | possibly damaging |
| rs8072568 | NP_004237 | H | L | HL | benign            |
| rs8072774 | XP_290768 | V | I | VI | benign            |
| rs8073060 | XP_496207 | Y | F | YF | benign            |
| rs8073695 | NP_079111 | G | S | GS | possibly damaging |
| rs8073787 | NP_004496 | R | W | RW | possibly damaging |
| rs8073809 | NP_055553 | I | T | IT | possibly damaging |
| rs8074277 | NP_078978 | M | V | MV | benign            |
| rs8074290 | NP_002940 | P | S | PS | probably damaging |
| rs8074656 | NP_001363 | W | R | WR | probably damaging |
| rs8074656 | NP_004653 | W | R | WR | probably damaging |
| rs8074806 | NP_055775 | A | V | AV | benign            |
| rs8075017 | NP_817084 | L | F | LF | benign            |
| rs8075017 | NP_003940 | L | F | LF | benign            |
| rs8075276 | NP_057055 | V | A | VA | benign            |
| rs8075739 | XP_085722 | R | K | RK | benign            |
| rs8076130 | XP_497524 | V | I | VI | benign            |
| rs8076196 | NP_665741 | M | I | MI | benign            |
| rs8076599 | NP_066292 | I | V | IV | benign            |
| rs8076604 | NP_976063 | A | V | AV | benign            |
| rs8076604 | NP_510880 | A | V | AV | benign            |
| rs8076632 | NP_073738 | Q | E | QE | benign            |
| rs8077302 | NP_001294 | R | Q | RQ | benign            |
| rs8077382 | NP_060884 | V | A | VA | benign            |
| rs8077469 | NP_775891 | R | Q | RQ | benign            |
| rs8077661 | NP_001130 | G | S | GS | benign            |
| rs8078059 | NP_443089 | S | P | SP | benign            |
| rs8078150 | NP_006373 | L | F | LF | benign            |
| rs8078217 | NP_443089 | F | L | FL | benign            |
| rs8078238 | NP_009198 | V | I | VI | benign            |
| rs8078660 | NP_056536 | P | L | PL | possibly damaging |
| rs8079267 | NP_000204 | Q | H | QH | benign            |
| rs8079373 | NP_997229 | H | Q | HQ | possibly damaging |
| rs8079507 | NP_689675 | A | V | AV | benign            |
| rs8080046 | NP_203747 | H | Q | HQ | possibly damaging |
| rs8080100 | XP_375485 | V | M | VM | benign            |
| rs8080182 | XP_085689 | G | S | GS | benign            |
| rs8080582 | NP_110435 | A | T | AT | benign            |
| rs8080598 | NP_110435 | R | H | RH | benign            |

|           |           |   |   |    |                   |
|-----------|-----------|---|---|----|-------------------|
| rs8080966 | NP_658988 | P | L | PL | probably damaging |
| rs8081370 | NP_203693 | I | V | IV | benign            |
| rs8081536 | NP_004646 | R | H | RH | possibly damaging |
| rs8082683 | NP_003762 | A | V | AV | possibly damaging |
| rs8082898 | NP_036439 | Y | C | YC | probably damaging |
| rs8082945 | XP_058931 | R | Q | RQ | benign            |
| rs8083708 | NP_775901 | D | A | DA | possibly damaging |
| rs8083854 | XP_208185 | Q | R | QR | benign            |
| rs8084295 | NP_073751 | L | V | LV | benign            |
| rs8087020 | XP_058931 | E | K | EK | benign            |
| rs8088145 | XP_497573 | T | N | TN | benign            |
| rs8088347 | NP_060417 | D | N | DN | benign            |
| rs8090913 | NP_006544 | R | Q | RQ | benign            |
| rs8091003 | NP_001933 | N | T | NT | benign            |
| rs8091117 | NP_001933 | T | N | TN | benign            |
| rs8093707 | NP_031371 | P | S | PS | probably damaging |
| rs8094412 | NP_660330 | R | I | RI | benign            |
| rs8096452 | NP_036439 | E | Q | EQ | benign            |
| rs8097425 | NP_005015 | I | M | IM | benign            |
| rs8098956 | XP_497598 | P | S | PS | possibly damaging |
| rs8099021 | NP_003794 | A | G | AG | benign            |
| rs8099409 | NP_116322 | F | L | FL | benign            |
| rs8100241 | NP_689576 | A | T | AT | benign            |
| rs8100431 | NP_115746 | R | Q | RQ | benign            |
| rs8100491 | NP_998763 | Q | R | QR | possibly damaging |
| rs8100497 | NP_919306 | A | T | AT | benign            |
| rs8100525 | NP_005474 | K | R | KR | benign            |
| rs8100709 | NP_892018 | T | A | TA | benign            |
| rs8100724 | NP_005994 | A | S | AS | benign            |
| rs8100856 | NP_620168 | V | I | VI | benign            |
| rs8101191 | NP_002775 | L | V | LV | benign            |
| rs8101688 | XP_371142 | T | I | TI | possibly damaging |
| rs8101961 | NP_079517 | A | V | AV | benign            |
| rs8102086 | NP_004877 | C | R | CR | probably damaging |
| rs8102258 | XP_371139 | V | A | VA | benign            |
| rs8102488 | NP_008821 | F | I | FI | benign            |
| rs8102646 | NP_115960 | Q | R | QR | benign            |
| rs8102872 | NP_001993 | R | Q | RQ | benign            |
| rs8102982 | NP_999875 | L | P | LP | possibly damaging |
| rs8103002 | XP_208204 | A | G | AG | possibly damaging |
| rs8103051 | NP_001807 | I | M | IM | benign            |
| rs8103142 | NP_742151 | K | R | KR | benign            |
| rs8103362 | NP_742150 | T | A | TA | benign            |
| rs8103631 | NP_039228 | R | W | RW | possibly damaging |
| rs8104055 | XP_053966 | E | Q | EQ | benign            |
| rs8104153 | NP_612451 | E | Q | EQ | benign            |

|           |           |   |   |    |                   |
|-----------|-----------|---|---|----|-------------------|
| rs8104206 | NP_006855 | Y | H | YH | benign            |
| rs8104361 | NP_067010 | R | C | RC | probably damaging |
| rs8104843 | XP_065050 | P | R | PR | benign            |
| rs8104890 | NP_079316 | V | I | VI | benign            |
| rs8105096 | NP_006855 | Y | C | YC | benign            |
| rs8105178 | NP_997208 | M | V | MV | possibly damaging |
| rs8105668 | NP_150630 | P | R | PR | benign            |
| rs8105668 | NP_942596 | P | R | PR | benign            |
| rs8105725 | NP_002682 | I | V | IV | benign            |
| rs8105737 | XP_065050 | Y | S | YS | probably damaging |
| rs8106037 | XP_371160 | G | R | GR | probably damaging |
| rs8106117 | NP_660340 | M | T | MT | probably damaging |
| rs8106130 | NP_573398 | Y | S | YS | probably damaging |
| rs8106130 | NP_570127 | Y | S | YS | probably damaging |
| rs8106130 | NP_573399 | Y | S | YS | probably damaging |
| rs8106404 | NP_006140 | T | M | TM | possibly damaging |
| rs8106409 | NP_079116 | K | E | KE | benign            |
| rs8107127 | NP_058637 | F | C | FC | benign            |
| rs8107127 | NP_982353 | F | C | FC | possibly damaging |
| rs8107847 | NP_775752 | E | G | EG | possibly damaging |
| rs8107859 | NP_775815 | T | I | TI | benign            |
| rs8107936 | NP_002772 | V | L | VL | benign            |
| rs8108071 | NP_065863 | V | L | VL | benign            |
| rs8108174 | NP_689576 | L | Q | LQ | benign            |
| rs8108180 | NP_079521 | V | I | VI | benign            |
| rs8108188 | NP_000444 | C | G | CG | possibly damaging |
| rs8108270 | NP_065864 | K | R | KR | possibly damaging |
| rs8108570 | XP_496315 | M | L | ML | benign            |
| rs8108621 | XP_372723 | R | Q | RQ | benign            |
| rs8108721 | XP_065050 | F | L | FL | benign            |
| rs8108738 | XP_038150 | G | S | GS | benign            |
| rs8108981 | NP_079521 | M | V | MV | benign            |
| rs8108996 | XP_050564 | P | L | PL | probably damaging |
| rs8109165 | NP_203127 | H | Y | HY | benign            |
| rs8109273 | XP_371140 | Y | H | YH | benign            |
| rs8109661 | NP_078958 | G | D | GD | possibly damaging |
| rs8110220 | NP_057330 | N | D | ND | benign            |
| rs8110264 | XP_209178 | N | S | NS | benign            |
| rs8110271 | NP_056498 | A | T | AT | benign            |
| rs8110300 | NP_005753 | R | L | RL | possibly damaging |
| rs8110904 | NP_001703 | A | V | AV | benign            |
| rs8110972 | XP_371146 | Y | F | YF | benign            |
| rs8111085 | NP_001370 | I | V | IV | benign            |
| rs8111135 | NP_056498 | A | V | AV | benign            |
| rs8111171 | NP_001703 | Q | K | QK | probably damaging |
| rs8111468 | NP_001703 | Q | H | QH | benign            |



|           |           |   |   |    |                   |
|-----------|-----------|---|---|----|-------------------|
| rs8111570 | XP_372719 | D | E | DE | benign            |
| rs8111625 | NP_775753 | T | S | TS | benign            |
| rs8111790 | NP_057620 | H | Q | HQ | probably damaging |
| rs8112667 | NP_775753 | P | T | PT | possibly damaging |
| rs8112679 | NP_037492 | G | D | GD | possibly damaging |
| rs8112740 | XP_209155 | E | A | EA | possibly damaging |
| rs8112811 | NP_003314 | D | N | DN | benign            |
| rs8113325 | NP_036509 | T | M | TM | probably damaging |
| rs8113504 | XP_091886 | N | S | NS | benign            |
| rs8113564 | NP_919409 | G | D | GD | possibly damaging |
| rs8113564 | NP_055496 | G | D | GD | possibly damaging |
| rs8113704 | NP_640332 | V | A | VA | benign            |
| rs8114297 | NP_002886 | I | M | IM | benign            |
| rs8114680 | NP_852131 | G | E | GE | benign            |
| rs8118712 | NP_542406 | E | D | ED | benign            |
| rs8119864 | NP_898868 | P | L | PL | probably damaging |
| rs8119864 | NP_898869 | P | L | PL | probably damaging |
| rs8119864 | NP_036540 | P | L | PL | probably damaging |
| rs8120693 | NP_938205 | A | T | AT | benign            |
| rs8120713 | NP_543013 | P | L | PL | probably damaging |
| rs8121353 | NP_542174 | R | K | RK | benign            |
| rs8122355 | NP_543013 | P | L | PL | probably damaging |
| rs8123195 | NP_078980 | N | S | NS | benign            |
| rs8125581 | NP_004985 | D | N | DN | probably damaging |
| rs8127568 | XP_371409 | E | K | EK | benign            |
| rs8128004 | NP_059143 | Q | H | QH | possibly damaging |
| rs8128440 | NP_066553 | N | D | ND | benign            |
| rs8129054 | XP_371411 | T | A | TA | benign            |
| rs8129760 | XP_375931 | D | E | DE | benign            |
| rs8129891 | NP_008864 | A | T | AT | benign            |
| rs8129954 | XP_375936 | V | I | VI | benign            |
| rs8129968 | XP_086761 | R | W | RW | possibly damaging |
| rs8130110 | NP_002763 | Y | C | YC | probably damaging |
| rs8131611 | NP_003711 | I | V | IV | benign            |
| rs8131611 | NP_982257 | I | V | IV | benign            |
| rs8131693 | NP_006022 | R | Q | RQ | benign            |
| rs8133052 | NP_001227 | C | Y | CY | benign            |
| rs8134187 | NP_002763 | S | C | SC | possibly damaging |
| rs8135276 | NP_006596 | A | T | AT | benign            |
| rs8135914 | XP_032996 | Q | R | QR | benign            |
| rs8135982 | NP_612424 | G | S | GS | benign            |
| rs8136495 | NP_149977 | T | M | TM | possibly damaging |
| rs8136946 | NP_563581 | F | L | FL | benign            |
| rs8137247 | NP_705843 | D | V | DV | probably damaging |
| rs8137437 | NP_683515 | T | I | TI | possibly damaging |
| rs8137748 | NP_003605 | R | H | RH | possibly damaging |

|           |           |   |   |    |                   |
|-----------|-----------|---|---|----|-------------------|
| rs8137873 | NP_065194 | L | P | LP | possibly damaging |
| rs8138122 | NP_064455 | R | H | RH | benign            |
| rs8138516 | XP_376007 | S | T | ST | benign            |
| rs8139305 | NP_005129 | A | V | AV | benign            |
| rs8139383 | NP_056518 | L | M | LM | benign            |
| rs8139422 | NP_077300 | D | E | DE | benign            |
| rs8139552 | NP_620169 | D | N | DN | benign            |
| rs8140287 | XP_376008 | R | Q | RQ | benign            |
| rs8140743 | NP_443732 | C | S | CS | probably damaging |
| rs8141153 | NP_003669 | T | S | TS | benign            |
| rs8141262 | NP_066919 | T | M | TM | benign            |
| rs8141797 | NP_062547 | N | S | NS | benign            |
| rs8142477 | NP_689452 | S | C | SC | benign            |
| rs8142477 | NP_689453 | S | C | SC | possibly damaging |
| rs8143121 | XP_086894 | R | H | RH | benign            |
| rs8175974 | NP_000411 | A | T | AT | benign            |
| rs8176038 | NP_000411 | L | P | LP | probably damaging |
| rs8176048 | NP_000411 | S | A | SA | benign            |
| rs8176058 | NP_000411 | T | M | TM | benign            |
| rs8176059 | NP_000411 | R | W | RW | possibly damaging |
| rs8176153 | NP_009230 | G | S | GS | possibly damaging |
| rs8176153 | NP_009231 | G | S | GS | possibly damaging |
| rs8176153 | NP_009232 | G | S | GS | possibly damaging |
| rs8176153 | NP_009233 | G | S | GS | possibly damaging |
| rs8176153 | NP_009227 | G | S | GS | possibly damaging |
| rs8176219 | NP_009229 | T | A | TA | benign            |
| rs8176219 | NP_009233 | T | A | TA | benign            |
| rs8176219 | NP_009234 | T | A | TA | benign            |
| rs8176219 | NP_009236 | T | A | TA | benign            |
| rs8176219 | NP_009228 | T | A | TA | benign            |
| rs8176219 | NP_009235 | T | A | TA | benign            |
| rs8176344 | NP_000776 | V | L | VL | benign            |
| rs8176393 | NP_006282 | T | I | TI | benign            |
| rs8176785 | NP_006148 | Q | R | QR | possibly damaging |
| rs8176786 | NP_006148 | R | W | RW | probably damaging |
| rs8176788 | NP_006148 | G | S | GS | possibly damaging |
| rs8176919 | NP_005214 | G | R | GR | probably damaging |
| rs8176924 | NP_005214 | G | D | GD | benign            |
| rs8176927 | NP_005214 | R | S | RS | benign            |
| rs8176928 | NP_005214 | R | G | RG | probably damaging |
| rs8176939 | NP_005214 | A | P | AP | possibly damaging |
| rs8176940 | NP_005214 | C | Y | CY | probably damaging |
| rs8177068 | NP_002612 | V | M | VM | benign            |
| rs8177076 | NP_002612 | P | L | PL | possibly damaging |
| rs8177077 | NP_002612 | G | S | GS | possibly damaging |
| rs8177143 | NP_004436 | P | R | PR | possibly damaging |

|           |           |   |   |    |                   |
|-----------|-----------|---|---|----|-------------------|
| rs8177146 | NP_004436 | S | A | SA | benign            |
| rs8177173 | NP_004436 | G | S | GS | benign            |
| rs8177175 | NP_004436 | R | Q | RQ | benign            |
| rs8177238 | NP_001054 | D | G | DG | benign            |
| rs8177318 | NP_001054 | S | R | SR | benign            |
| rs8177369 | NP_683708 | A | P | AP | benign            |
| rs8177369 | NP_443119 | A | P | AP | benign            |
| rs8177374 | NP_443119 | S | L | SL | benign            |
| rs8177374 | NP_683708 | S | L | SL | possibly damaging |
| rs8177399 | NP_443119 | R | W | RW | benign            |
| rs8177399 | NP_683708 | R | W | RW | possibly damaging |
| rs8177400 | NP_683708 | D | N | DN | benign            |
| rs8177400 | NP_443119 | D | N | DN | benign            |
| rs8177445 | NP_002075 | F | L | FL | probably damaging |
| rs8177504 | NP_694861 | P | S | PS | possibly damaging |
| rs8177504 | NP_003049 | P | S | PS | possibly damaging |
| rs8177507 | NP_694861 | M | I | MI | possibly damaging |
| rs8177507 | NP_003049 | M | I | MI | possibly damaging |
| rs8177508 | NP_694861 | M | V | MV | benign            |
| rs8177508 | NP_003049 | M | V | MV | benign            |
| rs8177509 | NP_694861 | F | L | FL | benign            |
| rs8177509 | NP_003049 | F | L | FL | benign            |
| rs8177513 | NP_694861 | A | G | AG | benign            |
| rs8177513 | NP_003049 | A | G | AG | benign            |
| rs8177516 | NP_694861 | R | C | RC | probably damaging |
| rs8177516 | NP_003049 | R | C | RC | probably damaging |
| rs8177517 | NP_003049 | K | Q | KQ | benign            |
| rs8177536 | NP_037514 | A | E | AE | possibly damaging |
| rs8177832 | NP_068594 | H | R | HR | benign            |
| rs8177877 | NP_004474 | N | S | NS | benign            |
| rs8177988 | NP_000289 | V | I | VI | benign            |
| rs8177988 | NP_870986 | V | I | VI | benign            |
| rs8178318 | NP_006142 | T | I | TI | benign            |
| rs8178338 | NP_006142 | A | T | AT | benign            |
| rs8178355 | NP_006142 | R | Q | RQ | possibly damaging |
| rs8178401 | NP_006142 | R | Q | RQ | possibly damaging |
| rs8178408 | NP_006142 | I | T | IT | possibly damaging |
| rs8178412 | NP_006142 | D | N | DN | possibly damaging |
| rs8178733 | NP_000922 | A | D | AD | possibly damaging |
| rs8178733 | NP_000921 | A | D | AD | possibly damaging |
| rs8178733 | NP_127509 | A | D | AD | possibly damaging |
| rs8178747 | NP_000922 | R | S | RS | possibly damaging |
| rs8178747 | NP_000921 | R | S | RS | probably damaging |
| rs8178747 | NP_127509 | R | S | RS | probably damaging |
| rs8178748 | NP_000922 | A | T | AT | benign            |
| rs8178748 | NP_000921 | A | T | AT | benign            |

|           |           |   |   |    |                   |
|-----------|-----------|---|---|----|-------------------|
| rs8178748 | NP_127509 | A | T | AT | benign            |
| rs8178847 | NP_000033 | R | H | RH | benign            |
| rs8178967 | NP_002076 | S | N | SN | benign            |
| rs8178989 | NP_065574 | R | P | RP | possibly damaging |
| rs8178989 | NP_066266 | R | P | RP | possibly damaging |
| rs8178989 | NP_066265 | R | P | RP | possibly damaging |
| rs8178989 | NP_066264 | R | P | RP | possibly damaging |
| rs8178990 | NP_065574 | L | F | LF | benign            |
| rs8178990 | NP_066266 | L | F | LF | benign            |
| rs8178990 | NP_066265 | L | F | LF | benign            |
| rs8178990 | NP_066264 | L | F | LF | benign            |
| rs8178991 | NP_065574 | D | N | DN | benign            |
| rs8178991 | NP_066266 | D | N | DN | benign            |
| rs8178991 | NP_066265 | D | N | DN | benign            |
| rs8178991 | NP_066264 | D | N | DN | benign            |
| rs8179070 | NP_002657 | R | W | RW | possibly damaging |
| rs8179071 | NP_002657 | S | L | SL | benign            |
| rs8179072 | NP_002657 | A | V | AV | benign            |
| rs8179077 | NP_003838 | Q | R | QR | benign            |
| rs8179142 | NP_002997 | P | S | PS | possibly damaging |
| rs8179169 | NP_958799 | R | P | RP | possibly damaging |
| rs8179180 | NP_073714 | V | M | VM | benign            |
| rs8179183 | NP_002294 | K | N | KN | benign            |
| rs8179199 | NP_001141 | T | M | TM | probably damaging |
| rs8179206 | NP_001477 | E | G | EG | possibly damaging |
| rs8179212 | NP_001477 | G | S | GS | possibly damaging |
| rs8179249 | NP_001477 | R | Q | RQ | benign            |
| rs8180688 | NP_714968 | T | M | TM | benign            |
| rs8180688 | NP_078906 | T | M | TM | benign            |
| rs8180870 | NP_073579 | T | A | TA | benign            |
| rs8181241 | XP_377073 | P | S | PS | benign            |
| rs8181241 | NP_878908 | P | S | PS | benign            |
| rs8181357 | NP_963858 | E | D | ED | benign            |
| rs8181357 | NP_570140 | E | D | ED | benign            |
| rs8181512 | XP_372365 | H | R | HR | probably damaging |
| rs8181529 | XP_372365 | S | A | SA | benign            |
| rs8181819 | NP_733837 | G | R | GR | probably damaging |
| rs8182018 | NP_006145 | W | G | WG | probably damaging |
| rs8182086 | XP_375247 | S | N | SN | benign            |
| rs8182793 | NP_899069 | E | G | EG | possibly damaging |
| rs8182793 | NP_899067 | E | G | EG | possibly damaging |
| rs8182904 | NP_787073 | V | M | VM | benign            |
| rs8183328 | NP_733794 | E | G | EG | probably damaging |
| rs8183387 | NP_742003 | L | P | LP | possibly damaging |
| rs8183462 | NP_056293 | S | A | SA | benign            |
| rs8183759 | NP_000924 | V | G | VG | possibly damaging |

|           |           |   |   |    |                   |
|-----------|-----------|---|---|----|-------------------|
| rs8183759 | NP_877949 | V | G | VG | possibly damaging |
| rs8187636 | NP_004946 | E | K | EK | benign            |
| rs8187641 | NP_004946 | I | T | IT | possibly damaging |
| rs8187643 | NP_001523 | D | Y | DY | probably damaging |
| rs8187644 | NP_001523 | N | K | NK | possibly damaging |
| rs8187648 | NP_001523 | P | L | PL | probably damaging |
| rs8187667 | NP_000383 | M | L | ML | possibly damaging |
| rs8187668 | NP_000383 | D | G | DG | possibly damaging |
| rs8187670 | NP_000383 | T | I | TI | benign            |
| rs8187672 | NP_000383 | K | E | KE | possibly damaging |
| rs8187673 | NP_000383 | F | L | FL | benign            |
| rs8187676 | NP_000383 | I | T | IT | benign            |
| rs8187684 | NP_000383 | I | V | IV | benign            |
| rs8187685 | NP_000383 | I | T | IT | possibly damaging |
| rs8187686 | NP_000383 | N | S | NS | possibly damaging |
| rs8187689 | NP_000383 | L | R | LR | benign            |
| rs8187692 | NP_000383 | R | L | RL | probably damaging |
| rs8187694 | NP_000383 | V | E | VE | benign            |
| rs8187699 | NP_000383 | T | A | TA | benign            |
| rs8187700 | NP_000383 | P | L | PL | probably damaging |
| rs8187710 | NP_000383 | C | Y | CY | probably damaging |
| rs8187715 | NP_068812 | T | M | TM | benign            |
| rs8187717 | NP_068812 | A | S | AS | benign            |
| rs8187725 | NP_068812 | T | I | TI | possibly damaging |
| rs8187732 | NP_003046 | R | Q | RQ | benign            |
| rs8187733 | NP_003046 | A | P | AP | benign            |
| rs8187734 | NP_003046 | R | W | RW | possibly damaging |
| rs8187738 | NP_004204 | S | C | SC | benign            |
| rs8187738 | NP_964014 | S | C | SC | possibly damaging |
| rs8187744 | NP_004204 | S | N | SN | benign            |
| rs8187744 | NP_964014 | S | N | SN | benign            |
| rs8187754 | NP_004204 | A | S | AS | benign            |
| rs8187756 | NP_004204 | A | V | AV | benign            |
| rs8187758 | NP_004204 | Q | K | QK | possibly damaging |
| rs8187762 | NP_004204 | V | I | VI | benign            |
| rs8187769 | NP_004204 | S | P | SP | possibly damaging |
| rs8187773 | NP_004204 | N | S | NS | benign            |
| rs8187774 | NP_004204 | L | V | LV | benign            |
| rs8187788 | NP_061337 | L | V | LV | benign            |
| rs8187788 | NP_061338 | L | V | LV | benign            |
| rs8187788 | NP_000434 | L | V | LV | benign            |
| rs8187792 | NP_061337 | L | V | LV | benign            |
| rs8187792 | NP_061338 | L | V | LV | benign            |
| rs8187792 | NP_000434 | L | V | LV | benign            |
| rs8187797 | NP_061337 | E | D | ED | benign            |
| rs8187797 | NP_061338 | E | D | ED | benign            |

|           |           |   |   |    |                   |
|-----------|-----------|---|---|----|-------------------|
| rs8187797 | NP_000434 | E | D | ED | benign            |
| rs8187799 | NP_061337 | R | G | RG | benign            |
| rs8187799 | NP_061338 | R | G | RG | benign            |
| rs8187799 | NP_000434 | R | G | RG | benign            |
| rs8187800 | NP_061337 | T | N | TN | benign            |
| rs8187800 | NP_061338 | T | N | TN | benign            |
| rs8187800 | NP_000434 | T | N | TN | benign            |
| rs8187801 | NP_061337 | R | Q | RQ | possibly damaging |
| rs8187801 | NP_061338 | R | Q | RQ | possibly damaging |
| rs8187801 | NP_000434 | R | Q | RQ | possibly damaging |
| rs8187811 | NP_061337 | I | V | IV | benign            |
| rs8187811 | NP_061338 | I | V | IV | benign            |
| rs8187811 | NP_000434 | I | V | IV | benign            |
| rs8187817 | NP_005064 | F | Y | FY | benign            |
| rs8187818 | NP_005064 | V | I | VI | benign            |
| rs8187820 | NP_005064 | V | M | VM | benign            |
| rs8187821 | NP_005064 | S | R | SR | benign            |
| rs8187830 | NP_005064 | P | S | PS | benign            |
| rs8187838 | NP_005064 | T | N | TN | benign            |
| rs8187844 | NP_063954 | S | F | SF | benign            |
| rs8187844 | NP_063915 | S | F | SF | possibly damaging |
| rs8187844 | NP_063953 | S | F | SF | possibly damaging |
| rs8187844 | NP_063955 | S | F | SF | possibly damaging |
| rs8187844 | NP_063956 | S | F | SF | possibly damaging |
| rs8187844 | NP_063957 | S | F | SF | possibly damaging |
| rs8187844 | NP_004987 | S | F | SF | possibly damaging |
| rs8187848 | NP_063915 | R | Q | RQ | benign            |
| rs8187848 | NP_063953 | R | Q | RQ | benign            |
| rs8187848 | NP_063954 | R | Q | RQ | benign            |
| rs8187848 | NP_063955 | R | Q | RQ | benign            |
| rs8187848 | NP_063956 | R | Q | RQ | benign            |
| rs8187848 | NP_063957 | R | Q | RQ | benign            |
| rs8187848 | NP_004987 | R | Q | RQ | benign            |
| rs8187852 | NP_063915 | V | M | VM | benign            |
| rs8187852 | NP_063953 | V | M | VM | benign            |
| rs8187852 | NP_063954 | V | M | VM | benign            |
| rs8187852 | NP_063955 | V | M | VM | benign            |
| rs8187852 | NP_063956 | V | M | VM | benign            |
| rs8187852 | NP_063957 | V | M | VM | benign            |
| rs8187852 | NP_004987 | V | M | VM | benign            |
| rs8187929 | NP_000680 | I | F | IF | benign            |
| rs8190315 | NP_001187 | S | G | SG | benign            |
| rs8190315 | NP_932070 | S | G | SG | benign            |
| rs8190600 | NP_000809 | K | N | KN | possibly damaging |
| rs8190671 | NP_000809 | K | R | KR | benign            |
| rs8190730 | NP_000809 | R | Q | RQ | benign            |

|           |           |   |   |    |                   |
|-----------|-----------|---|---|----|-------------------|
| rs8190955 | NP_000628 | R | C | RC | probably damaging |
| rs8190976 | NP_000628 | G | S | GS | benign            |
| rs8190997 | NP_000628 | I | V | IV | benign            |
| rs8191004 | NP_000628 | E | D | ED | benign            |
| rs8191136 | NP_002144 | A | T | AT | benign            |
| rs8191328 | NP_003489 | V | I | VI | benign            |
| rs8191371 | NP_000166 | I | T | IT | probably damaging |
| rs8191494 | NP_000476 | Q | R | QR | possibly damaging |
| rs8191611 | NP_659480 | T | S | TS | benign            |
| rs8191612 | NP_659480 | R | W | RW | possibly damaging |
| rs8191613 | NP_659480 | R | Q | RQ | benign            |
| rs8191664 | NP_659480 | R | L | RL | benign            |
| rs8191666 | NP_659480 | P | T | PT | probably damaging |
| rs8191704 | NP_000867 | R | H | RH | benign            |
| rs8191746 | NP_000867 | P | L | PL | probably damaging |
| rs8191753 | NP_000867 | G | D | GD | probably damaging |
| rs8191754 | NP_000867 | L | V | LV | benign            |
| rs8191758 | NP_000867 | D | G | DG | possibly damaging |
| rs8191776 | NP_000867 | K | Q | KQ | benign            |
| rs8191797 | NP_000867 | G | S | GS | benign            |
| rs8191808 | NP_000867 | L | V | LV | benign            |
| rs8191819 | NP_000867 | G | S | GS | benign            |
| rs8191842 | NP_000867 | T | M | TM | benign            |
| rs8191843 | NP_000867 | V | I | VI | benign            |
| rs8191844 | NP_000867 | T | S | TS | possibly damaging |
| rs8191859 | NP_000867 | G | E | GE | possibly damaging |
| rs8191860 | NP_000867 | R | H | RH | benign            |
| rs8191904 | NP_000867 | R | H | RH | benign            |
| rs8191905 | NP_000867 | G | D | GD | benign            |
| rs8191908 | NP_000867 | I | M | IM | benign            |
| rs8191955 | NP_000867 | A | V | AV | benign            |
| rs8191979 | NP_003020 | M | V | MV | benign            |
| rs8191981 | NP_003020 | A | V | AV | benign            |
| rs8191984 | NP_003020 | S | L | SL | benign            |
| rs8191995 | NP_000233 | V | G | VG | probably damaging |
| rs8191996 | NP_000233 | N | S | NS | benign            |
| rs8192111 | NP_002404 | A | V | AV | benign            |
| rs8192284 | NP_000556 | D | A | DA | benign            |
| rs8192297 | NP_001141 | I | M | IM | benign            |
| rs8192341 | NP_003009 | N | T | NT | possibly damaging |
| rs8192448 | NP_000670 | V | G | VG | possibly damaging |
| rs8192454 | NP_000017 | D | E | DE | benign            |
| rs8192457 | NP_000017 | Q | R | QR | probably damaging |
| rs8192461 | NP_000017 | Y | H | YH | probably damaging |
| rs8192462 | NP_000467 | E | Q | EQ | benign            |
| rs8192466 | NP_733931 | T | I | TI | possibly damaging |

|           |           |   |   |    |                   |
|-----------|-----------|---|---|----|-------------------|
| rs8192466 | NP_733930 | T | I | TI | possibly damaging |
| rs8192466 | NP_733927 | T | I | TI | possibly damaging |
| rs8192467 | NP_000705 | R | L | RL | probably damaging |
| rs8192475 | NP_000734 | R | H | RH | possibly damaging |
| rs8192495 | NP_001874 | R | H | RH | benign            |
| rs8192498 | NP_001874 | V | I | VI | benign            |
| rs8192504 | NP_065438 | D | N | DN | possibly damaging |
| rs8192506 | NP_065438 | M | V | MV | benign            |
| rs8192507 | NP_065438 | G | R | GR | probably damaging |
| rs8192513 | NP_003848 | G | R | GR | possibly damaging |
| rs8192514 | NP_003848 | S | R | SR | benign            |
| rs8192518 | NP_009216 | V | I | VI | benign            |
| rs8192522 | NP_004239 | R | H | RH | possibly damaging |
| rs8192523 | NP_004239 | D | G | DG | possibly damaging |
| rs8192524 | NP_004239 | P | L | PL | benign            |
| rs8192530 | NP_000862 | A | S | AS | benign            |
| rs8192533 | NP_000862 | P | T | PT | possibly damaging |
| rs8192535 | NP_004967 | Y | F | YF | benign            |
| rs8192545 | NP_002396 | L | V | LV | benign            |
| rs8192548 | NP_002396 | R | C | RC | probably damaging |
| rs8192552 | NP_005950 | G | E | GE | possibly damaging |
| rs8192553 | NP_005950 | R | H | RH | possibly damaging |
| rs8192556 | NP_002491 | P | H | PH | probably damaging |
| rs8192561 | NP_002500 | P | A | PA | benign            |
| rs8192562 | NP_002500 | A | T | AT | benign            |
| rs8192563 | NP_002500 | G | A | GA | possibly damaging |
| rs8192594 | NP_001108 | A | T | AT | benign            |
| rs8192606 | NP_000930 | P | A | PA | benign            |
| rs8192609 | NP_000945 | K | T | KT | possibly damaging |
| rs8192618 | NP_612200 | R | C | RC | possibly damaging |
| rs8192624 | NP_778237 | V | I | VI | benign            |
| rs8192625 | NP_778237 | C | Y | CY | possibly damaging |
| rs8192626 | NP_444508 | S | N | SN | benign            |
| rs8192627 | NP_444508 | D | A | DA | benign            |
| rs8192653 | XP_498294 | H | R | HR | benign            |
| rs8192662 | NP_665736 | Y | N | YN | probably damaging |
| rs8192662 | NP_005255 | Y | N | YN | probably damaging |
| rs8192671 | NP_005624 | N | S | NS | benign            |
| rs8192678 | NP_037393 | G | S | GS | benign            |
| rs8192683 | NP_006199 | R | T | RT | benign            |
| rs8192687 | NP_002702 | G | S | GS | possibly damaging |
| rs8192690 | NP_000343 | V | I | VI | benign            |
| rs8192702 | NP_001033 | A | V | AV | benign            |
| rs8192703 | NP_001033 | T | S | TS | benign            |
| rs8192707 | NP_002651 | S | G | SG | benign            |
| rs8192707 | NP_877963 | S | G | SG | benign            |



|           |           |   |   |    |                   |
|-----------|-----------|---|---|----|-------------------|
| rs8192708 | NP_002582 | V | I | VI | benign            |
| rs8192709 | NP_000758 | R | C | RC | possibly damaging |
| rs8192730 | NP_000753 | E | D | ED | benign            |
| rs8192784 | NP_000757 | R | Q | RQ | benign            |
| rs8192789 | NP_000757 | R | C | RC | benign            |
| rs8192795 | NP_085125 | L | P | LP | possibly damaging |
| rs8192833 | NP_001052 | V | I | VI | benign            |
| rs8192833 | NP_112246 | V | I | VI | benign            |
| rs8192864 | NP_001052 | R | Q | RQ | possibly damaging |
| rs8192868 | NP_001052 | E | K | EK | benign            |
| rs8192868 | NP_112246 | E | K | EK | benign            |
| rs8192874 | NP_000771 | N | S | NS | benign            |
| rs8192875 | NP_000771 | N | D | ND | possibly damaging |
| rs8192894 | NP_001975 | G | E | GE | benign            |
| rs8192912 | NP_543029 | D | H | DH | benign            |
| rs8192912 | NP_954578 | D | H | DH | benign            |
| rs8192917 | NP_004122 | Q | R | QR | benign            |
| rs8192924 | NP_003860 | R | H | RH | benign            |
| rs8192924 | NP_932327 | R | H | RH | benign            |
| rs9256983 | NP_002107 | E | A | EA | benign            |
| rs9257110 | XP_498064 | I | T | IT | possibly damaging |
| rs9257111 | XP_498064 | P | L | PL | probably damaging |
| rs9257694 | XP_498075 | M | T | MT | probably damaging |
| rs9257770 | NP_110503 | I | M | IM | benign            |
| rs9257834 | NP_039224 | V | F | VF | possibly damaging |
| rs9257857 | NP_039225 | A | T | AT | benign            |
| rs9260121 | NP_002107 | L | V | LV | benign            |
| rs9260132 | NP_002107 | E | Q | EQ | probably damaging |
| rs9260137 | NP_002107 | T | I | TI | benign            |
| rs9260138 | NP_002107 | L | V | LV | benign            |
| rs9260139 | NP_002107 | L | P | LP | possibly damaging |
| rs9260140 | NP_002107 | R | H | RH | benign            |
| rs9260153 | NP_002107 | S | P | SP | benign            |
| rs9260154 | NP_002107 | A | V | AV | benign            |
| rs9260156 | NP_002107 | L | W | LW | benign            |
| rs9260157 | NP_002107 | A | V | AV | benign            |
| rs9260159 | NP_002107 | T | M | TM | benign            |
| rs9260160 | NP_002107 | E | D | ED | benign            |
| rs9260174 | NP_002107 | P | A | PA | benign            |
| rs9260177 | NP_002107 | P | A | PA | benign            |
| rs9260179 | NP_002107 | I | V | IV | benign            |
| rs9260180 | NP_002107 | G | S | GS | benign            |
| rs9260183 | NP_002107 | E | Q | EQ | benign            |
| rs9260188 | NP_002107 | V | M | VM | benign            |
| rs9260190 | NP_002107 | M | R | MR | possibly damaging |
| rs9261290 | NP_739576 | T | A | TA | benign            |

|           |           |   |   |    |                   |
|-----------|-----------|---|---|----|-------------------|
| rs9261291 | NP_739576 | R | H | RH | benign            |
| rs9261292 | NP_739576 | G | R | GR | possibly damaging |
| rs9261293 | NP_079512 | E | G | EG | possibly damaging |
| rs9262138 | NP_003578 | D | G | DG | possibly damaging |
| rs9262151 | XP_376479 | E | A | EA | possibly damaging |
| rs9262152 | XP_376479 | R | K | RK | benign            |
| rs9262322 | XP_371809 | A | V | AV | benign            |
| rs9262323 | XP_371809 | E | G | EG | benign            |
| rs9262324 | XP_371809 | E | D | ED | benign            |
| rs9262325 | XP_371809 | S | R | SR | benign            |
| rs9262326 | XP_371809 | T | A | TA | benign            |
| rs9262327 | XP_371809 | T | I | TI | benign            |
| rs9262332 | XP_371809 | E | D | ED | benign            |
| rs9262333 | XP_371809 | P | A | PA | benign            |
| rs9262334 | XP_371809 | T | I | TI | benign            |
| rs9262336 | XP_371809 | G | R | GR | possibly damaging |
| rs9262337 | XP_371809 | G | E | GE | possibly damaging |
| rs9262341 | XP_371809 | V | A | VA | benign            |
| rs9262342 | XP_371809 | E | D | ED | benign            |
| rs9262344 | XP_371809 | P | L | PL | benign            |
| rs9262346 | XP_371809 | G | R | GR | possibly damaging |
| rs9262349 | XP_371809 | S | R | SR | benign            |
| rs9262351 | XP_371809 | T | A | TA | benign            |
| rs9262352 | XP_371809 | T | I | TI | benign            |
| rs9262354 | XP_371809 | S | N | SN | benign            |
| rs9262355 | XP_371809 | G | R | GR | possibly damaging |
| rs9262357 | XP_371809 | S | G | SG | benign            |
| rs9262362 | XP_371809 | P | T | PT | benign            |
| rs9262363 | XP_371809 | S | N | SN | benign            |
| rs9262365 | XP_371809 | G | S | GS | benign            |
| rs9262366 | XP_371809 | E | D | ED | benign            |
| rs9262367 | XP_371809 | I | V | IV | benign            |
| rs9262368 | XP_371809 | I | T | IT | benign            |
| rs9262370 | XP_371809 | V | A | VA | benign            |
| rs9262375 | XP_371809 | N | S | NS | benign            |
| rs9262376 | XP_371809 | E | D | ED | benign            |
| rs9262378 | XP_371809 | N | D | ND | benign            |
| rs9262379 | XP_371809 | N | S | NS | benign            |
| rs9262380 | XP_371809 | D | E | DE | benign            |
| rs9262383 | XP_371809 | E | D | ED | benign            |
| rs9262385 | XP_371809 | G | E | GE | possibly damaging |
| rs9262387 | XP_371809 | T | A | TA | benign            |
| rs9262388 | XP_371809 | T | I | TI | benign            |
| rs9262390 | XP_371809 | T | I | TI | benign            |
| rs9262391 | XP_371809 | A | V | AV | benign            |
| rs9262393 | XP_371809 | V | L | VL | benign            |

|           |           |   |   |    |                   |
|-----------|-----------|---|---|----|-------------------|
| rs9262394 | XP_371809 | V | A | VA | benign            |
| rs9262396 | XP_371809 | S | N | SN | benign            |
| rs9262397 | XP_371809 | T | N | TN | benign            |
| rs9262399 | XP_371809 | S | N | SN | benign            |
| rs9262401 | XP_371809 | A | V | AV | benign            |
| rs9262402 | XP_371809 | N | S | NS | benign            |
| rs9262403 | XP_371809 | G | E | GE | possibly damaging |
| rs9266139 | NP_005505 | E | Q | EQ | benign            |
| rs9266144 | NP_005505 | R | W | RW | probably damaging |
| rs9266150 | NP_005505 | Y | D | YD | benign            |
| rs9266153 | NP_005505 | S | R | SR | benign            |
| rs9266161 | NP_005505 | L | P | LP | probably damaging |
| rs9266162 | NP_005505 | L | V | LV | benign            |
| rs9266174 | NP_005505 | N | D | ND | benign            |
| rs9266178 | NP_005505 | E | K | EK | benign            |
| rs9266180 | NP_005505 | A | T | AT | benign            |
| rs9266183 | NP_005505 | D | G | DG | benign            |
| rs9266206 | NP_005505 | L | R | LR | benign            |
| rs9267532 | NP_067044 | R | C | RC | probably damaging |
| rs9267547 | NP_067069 | A | T | AT | benign            |
| rs9267795 | NP_061978 | G | V | GV | possibly damaging |
| rs9267799 | NP_061978 | R | Q | RQ | benign            |
| rs9268368 | NP_006772 | C | Y | CY | benign            |
| rs9268384 | NP_006772 | H | Y | HY | benign            |
| rs9272430 | NP_002113 | L | M | LM | benign            |
| rs9272689 | NP_002113 | C | Y | CY | benign            |
| rs9272691 | NP_002113 | E | G | EG | benign            |
| rs9272692 | NP_002113 | A | V | AV | benign            |
| rs9272693 | NP_002113 | R | W | RW | probably damaging |
| rs9272695 | NP_002113 | W | L | WL | benign            |
| rs9272696 | NP_002113 | E | V | EV | benign            |
| rs9272697 | NP_002113 | E | D | ED | benign            |
| rs9272698 | NP_002113 | F | L | FL | benign            |
| rs9272699 | NP_002113 | S | R | SR | benign            |
| rs9272700 | NP_002113 | K | Q | KQ | benign            |
| rs9272703 | NP_002113 | G | C | GC | possibly damaging |
| rs9272704 | NP_002113 | G | V | GV | possibly damaging |
| rs9272705 | NP_002113 | R | T | RT | benign            |
| rs9272706 | NP_002113 | M | I | MI | benign            |
| rs9272708 | NP_002113 | A | P | AP | probably damaging |
| rs9272709 | NP_002113 | A | V | AV | benign            |
| rs9272711 | NP_002113 | Y | S | YS | benign            |
| rs9272745 | NP_002113 | T | I | TI | benign            |
| rs9272785 | NP_002113 | A | T | AT | benign            |
| rs9272789 | NP_002113 | M | V | MV | benign            |
| rs9272793 | NP_002113 | Q | R | QR | benign            |

|           |           |   |   |    |                   |
|-----------|-----------|---|---|----|-------------------|
| rs9276436 | NP_064440 | V | A | VA | benign            |
| rs9276811 | NP_000584 | V | G | VG | possibly damaging |
| rs9276814 | NP_683756 | R | H | RH | benign            |
| rs9276814 | NP_002791 | R | H | RH | benign            |
| rs9277343 | NP_002112 | L | V | LV | benign            |
| rs9277345 | NP_002112 | F | Y | FY | benign            |
| rs9277348 | NP_002112 | F | L | FL | benign            |
| rs9277354 | NP_002112 | G | E | GE | possibly damaging |
| rs9277355 | NP_002112 | P | A | PA | probably damaging |
| rs9277356 | NP_002112 | M | V | MV | benign            |
| rs9277934 | NP_542411 | E | K | EK | benign            |
| rs9282541 | NP_005493 | R | C | RC | possibly damaging |
| rs9282543 | NP_005493 | V | A | VA | benign            |
| rs9282553 | NP_525023 | M | I | MI | benign            |
| rs9282554 | NP_525023 | N | Y | NY | benign            |
| rs9282554 | NP_758854 | N | Y | NY | benign            |
| rs9282564 | NP_000918 | N | D | ND | benign            |
| rs9282565 | NP_000918 | A | E | AE | benign            |
| rs9282570 | NP_005836 | M | V | MV | possibly damaging |
| rs9282571 | NP_004818 | F | I | FI | probably damaging |
| rs9282573 | NP_071882 | M | V | MV | benign            |
| rs9282574 | NP_071882 | V | M | VM | benign            |
| rs9282593 | NP_055139 | M | I | MI | benign            |
| rs9282603 | NP_000375 | Y | H | YH | benign            |
| rs9282624 | NP_001220 | I | M | IM | benign            |
| rs9282628 | NP_001227 | L | V | LV | benign            |
| rs9282642 | NP_787058 | S | N | SN | benign            |
| rs9282649 | NP_787058 | Q | E | QE | benign            |
| rs9282655 | NP_004351 | C | R | CR | probably damaging |
| rs9282670 | NP_000095 | Q | R | QR | benign            |
| rs9282671 | NP_000095 | Y | N | YN | probably damaging |
| rs9282681 | NP_000126 | T | A | TA | benign            |
| rs9282689 | NP_036322 | E | K | EK | possibly damaging |
| rs9282691 | NP_036322 | E | A | EA | benign            |
| rs9282691 | NP_658989 | E | A | EA | possibly damaging |
| rs9282692 | NP_036322 | A | T | AT | benign            |
| rs9282692 | NP_658989 | A | T | AT | benign            |
| rs9282693 | NP_036322 | A | V | AV | benign            |
| rs9282693 | NP_658989 | A | V | AV | benign            |
| rs9282697 | NP_036322 | S | N | SN | benign            |
| rs9282697 | NP_658989 | S | N | SN | benign            |
| rs9282702 | NP_002124 | P | L | PL | possibly damaging |
| rs9282730 | NP_004961 | P | S | PS | benign            |
| rs9282731 | NP_004961 | R | W | RW | probably damaging |
| rs9282734 | NP_000589 | H | P | HP | benign            |
| rs9282752 | NP_000625 | M | L | ML | benign            |

|           |              |   |   |    |                   |
|-----------|--------------|---|---|----|-------------------|
| rs9282796 | NP_000250    | S | L | SL | possibly damaging |
| rs9282808 | NP_000903    | D | N | DN | possibly damaging |
| rs9282817 | NP_000905    | G | V | GV | benign            |
| rs9282819 | NP_000905    | S | F | SF | possibly damaging |
| rs9282834 | NP_065681    | D | N | DN | benign            |
| rs9282834 | NP_066124    | D | N | DN | benign            |
| rs9282861 | NP_803880    | R | H | RH | benign            |
| rs9282861 | NP_001046    | R | H | RH | possibly damaging |
| rs9282861 | NP_803565    | R | H | RH | possibly damaging |
| rs9282861 | NP_803566    | R | H | RH | possibly damaging |
| rs9282861 | NP_803878    | R | H | RH | possibly damaging |
| rs9282975 | XP_496692    | V | F | VF | benign            |
| rs9283155 | XP_496332    | P | A | PA | benign            |
| rs9283156 | XP_496332    | H | Y | HY | benign            |
| rs9283633 | NP_001032    | A | T | AT | possibly damaging |
| rs9286257 | XP_372190    | A | V | AV | benign            |
| rs9286575 | NP_997301    | G | V | GV | probably damaging |
| rs9288938 | XP_210562    | S | I | SI | benign            |
| rs9289273 | XP_114301    | S | L | SL | possibly damaging |
| rs9290264 | NP_001032    | V | F | VF | possibly damaging |
| rs9291410 | XP_114418    | S | N | SN | benign            |
| rs9293796 | XP_293971    | S | R | SR | benign            |
| rs9294445 | NP_055426    | H | Y | HY | benign            |
| rs9295713 | XP_496798    | W | R | WR | possibly damaging |
| rs9295783 | XP_212581    | R | C | RC | possibly damaging |
| rs9296005 | NP_000583    | L | V | LV | benign            |
| rs9296005 | NP_001002029 | L | V | LV | benign            |
| rs9296146 | NP_071330    | R | H | RH | benign            |
| rs9296419 | NP_006493    | T | M | TM | possibly damaging |
| rs9296669 | NP_619639    | A | V | AV | benign            |
| rs9296669 | NP_733842    | A | V | AV | benign            |
| rs9297162 | NP_112561    | P | L | PL | benign            |
| rs9297605 | NP_003175    | T | S | TS | benign            |
| rs9297853 | NP_036604    | I | T | IT | possibly damaging |
| rs9298814 | NP_067091    | I | R | IR | probably damaging |
| rs9300466 | NP_005757    | P | L | PL | probably damaging |
| rs9302912 | NP_733938    | I | V | IV | benign            |
| rs9303634 | NP_056441    | L | S | LS | benign            |
| rs9303634 | NP_599026    | L | S | LS | possibly damaging |
| rs9304711 | NP_149121    | A | V | AV | benign            |
| rs9304850 | XP_371160    | G | R | GR | benign            |
| rs9305011 | XP_371155    | H | Q | HQ | possibly damaging |
| rs9305052 | XP_372712    | Q | E | QE | benign            |
| rs9305083 | NP_056507    | P | H | PH | benign            |
| rs9306099 | NP_004919    | G | S | GS | benign            |
| rs9306109 | NP_859016    | T | S | TS | benign            |

|           |           |   |   |    |                   |
|-----------|-----------|---|---|----|-------------------|
| rs9306111 | NP_941970 | R | H | RH | benign            |
| rs9306160 | XP_371417 | L | P | LP | benign            |
| rs9306198 | NP_056182 | P | S | PS | possibly damaging |
| rs9306515 | NP_073603 | T | M | TM | benign            |
| rs9308683 | NP_036316 | V | I | VI | benign            |
| rs9309428 | XP_371497 | G | S | GS | benign            |
| rs9310141 | XP_114303 | T | A | TA | benign            |
| rs9311404 | NP_036403 | V | L | VL | benign            |
| rs9311404 | NP_054878 | V | L | VL | benign            |
| rs9311440 | NP_003354 | Y | C | YC | probably damaging |
| rs9311440 | NP_955475 | Y | C | YC | probably damaging |
| rs9312870 | NP_612357 | N | S | NS | benign            |
| rs9313105 | NP_620687 | R | C | RC | probably damaging |
| rs9314282 | NP_068547 | R | M | RM | benign            |
| rs9314282 | NP_055080 | R | M | RM | possibly damaging |
| rs9314282 | NP_068548 | R | M | RM | possibly damaging |
| rs9315740 | NP_006522 | L | F | LF | benign            |
| rs9315740 | NP_783195 | L | F | LF | benign            |
| rs9315812 | NP_004285 | I | V | IV | benign            |
| rs9318536 | NP_006428 | Y | S | YS | benign            |
| rs9318554 | NP_006428 | C | R | CR | probably damaging |
| rs9318558 | NP_006428 | R | L | RL | benign            |
| rs9318600 | NP_006428 | F | Y | FY | benign            |
| rs9320350 | NP_115570 | A | G | AG | benign            |
| rs9321309 | NP_005012 | V | M | VM | benign            |
| rs9321712 | XP_371849 | A | T | AT | benign            |
| rs9322225 | NP_116221 | R | P | RP | benign            |
| rs9323183 | NP_004187 | L | V | LV | benign            |
| rs9323693 | XP_063315 | L | V | LV | benign            |
| rs9324055 | XP_040910 | V | M | VM | benign            |
| rs9324127 | NP_077816 | A | V | AV | benign            |
| rs9324624 | XP_371776 | P | L | PL | probably damaging |
| rs9324700 | NP_001438 | F | S | FS | benign            |
| rs9324847 | NP_114475 | I | L | IL | benign            |
| rs9324847 | NP_061742 | I | L | IL | benign            |
| rs9324996 | NP_995318 | N | S | NS | benign            |
| rs9324996 | NP_892005 | N | S | NS | benign            |
| rs9324996 | NP_612501 | N | S | NS | benign            |
| rs9326625 | XP_496332 | S | P | SP | possibly damaging |
| rs9326626 | XP_496332 | G | S | GS | benign            |
| rs9328764 | NP_861524 | R | C | RC | benign            |
| rs9329306 | NP_817124 | Q | H | QH | probably damaging |
| rs9329307 | NP_817124 | H | R | HR | probably damaging |
| rs9329368 | NP_056133 | N | S | NS | benign            |
| rs9329369 | NP_056133 | A | T | AT | benign            |
| rs9329964 | XP_372190 | V | M | VM | benign            |

|           |           |   |   |    |                   |
|-----------|-----------|---|---|----|-------------------|
| rs9330200 | NP_006079 | D | E | DE | benign            |
| rs9330229 | XP_375041 | M | V | MV | benign            |
| rs9330230 | XP_375041 | C | S | CS | probably damaging |
| rs9330305 | XP_372842 | M | L | ML | possibly damaging |
| rs9330414 | XP_497054 | S | L | SL | possibly damaging |
| rs9331936 | NP_001822 | N | H | NH | possibly damaging |
| rs9331936 | NP_976084 | N | H | NH | possibly damaging |
| rs9331938 | NP_001822 | D | N | DN | benign            |
| rs9331938 | NP_976084 | D | N | DN | benign            |
| rs9331940 | NP_001822 | S | L | SL | possibly damaging |
| rs9331940 | NP_976084 | S | L | SL | possibly damaging |
| rs9332000 | NP_001259 | A | T | AT | benign            |
| rs9332075 | NP_001259 | C | S | CS | possibly damaging |
| rs9332130 | NP_000762 | E | G | EG | benign            |
| rs9332239 | NP_000762 | P | S | PS | probably damaging |
| rs9332485 | NP_000121 | G | S | GS | possibly damaging |
| rs9332604 | NP_000121 | N | S | NS | benign            |
| rs9332605 | NP_000121 | R | L | RL | benign            |
| rs9332608 | NP_000121 | P | S | PS | probably damaging |
| rs9332701 | NP_000121 | M | T | MT | probably damaging |
| rs9332739 | NP_000054 | E | D | ED | benign            |
| rs9332772 | NP_005924 | E | K | EK | benign            |
| rs9332837 | NP_005924 | S | T | ST | benign            |
| rs9332838 | NP_005924 | P | R | PR | possibly damaging |
| rs9332839 | NP_005924 | Q | R | QR | benign            |
| rs9332859 | NP_005924 | V | I | VI | benign            |
| rs9332861 | NP_005924 | S | A | SA | benign            |
| rs9332968 | NP_000035 | I | T | IT | possibly damaging |
| rs9332969 | NP_000035 | R | H | RH | possibly damaging |
| rs9332970 | NP_000035 | I | T | IT | possibly damaging |
| rs9332971 | NP_000035 | R | H | RH | possibly damaging |
| rs9332973 | NP_077742 | A | T | AT | benign            |
| rs9332973 | NP_077743 | A | T | AT | benign            |
| rs9332973 | NP_000369 | A | T | AT | benign            |
| rs9332973 | NP_077744 | A | T | AT | benign            |
| rs9333174 | XP_167711 | R | H | RH | benign            |
| rs9333241 | XP_167711 | I | V | IV | benign            |
| rs9333269 | XP_167711 | Q | P | QP | possibly damaging |
| rs9333342 | NP_000705 | E | Q | EQ | benign            |
| rs9333548 | NP_006493 | R | W | RW | probably damaging |
| rs9333554 | NP_006493 | L | P | LP | possibly damaging |
| rs9333555 | NP_006493 | M | V | MV | benign            |
| rs9333569 | NP_000358 | M | V | MV | benign            |
| rs9333649 | NP_742053 | G | S | GS | possibly damaging |
| rs9333649 | NP_742054 | G | S | GS | possibly damaging |
| rs9333649 | NP_000229 | G | S | GS | possibly damaging |

|           |           |   |   |    |                   |
|-----------|-----------|---|---|----|-------------------|
| rs9340773 | NP_000116 | G | S | GS | benign            |
| rs9341248 | NP_000095 | S | N | SN | benign            |
| rs9341250 | NP_000095 | R | L | RL | benign            |
| rs9341273 | NP_872600 | E | G | EG | benign            |
| rs9341273 | NP_872601 | E | G | EG | benign            |
| rs9341273 | NP_009056 | E | G | EG | benign            |
| rs9341274 | NP_872600 | E | Q | EQ | benign            |
| rs9341274 | NP_872601 | E | Q | EQ | benign            |
| rs9341274 | NP_009056 | E | Q | EQ | benign            |
| rs9349029 | NP_002639 | A | V | AV | benign            |
| rs9349666 | XP_498100 | R | H | RH | benign            |
| rs9350373 | NP_003211 | R | G | RG | probably damaging |
| rs9350797 | NP_060404 | L | P | LP | probably damaging |
| rs9352000 | NP_612450 | N | T | NT | benign            |
| rs9352692 | XP_498109 | R | W | RW | probably damaging |
| rs9353493 | NP_862820 | S | F | SF | probably damaging |
| rs9353493 | NP_036513 | S | F | SF | probably damaging |
| rs9353689 | NP_055426 | A | S | AS | benign            |
| rs9354880 | NP_060838 | D | E | DE | benign            |
| rs9357283 | NP_001362 | K | E | KE | benign            |
| rs9357410 | NP_055160 | L | V | LV | benign            |
| rs9358140 | NP_071396 | R | K | RK | benign            |
| rs9358936 | NP_008978 | N | D | ND | benign            |
| rs9362415 | XP_048070 | I | V | IV | benign            |
| rs9362667 | XP_376519 | A | T | AT | benign            |
| rs9364381 | NP_055169 | R | T | RT | benign            |
| rs9365165 | NP_068812 | G | S | GS | benign            |
| rs9366785 | NP_004629 | G | S | GS | possibly damaging |
| rs9366785 | NP_542417 | G | S | GS | possibly damaging |
| rs9367358 | XP_371825 | Q | K | QK | benign            |
| rs9367359 | XP_371825 | N | D | ND | benign            |
| rs9368354 | NP_003211 | T | A | TA | benign            |
| rs9368537 | NP_149046 | A | P | AP | benign            |
| rs9368845 | NP_056060 | E | K | EK | benign            |
| rs9369265 | NP_937796 | W | R | WR | benign            |
| rs9369738 | NP_722580 | K | N | KN | benign            |
| rs9369905 | XP_371825 | A | D | AD | benign            |
| rs9370096 | NP_619639 | R | C | RC | benign            |
| rs9370096 | NP_733842 | R | C | RC | probably damaging |
| rs9370418 | NP_997293 | P | S | PS | benign            |
| rs9370867 | NP_037394 | N | S | NS | benign            |
| rs9371533 | NP_631904 | T | I | TI | benign            |
| rs9371596 | NP_149062 | R | K | RK | benign            |
| rs9371596 | NP_892006 | R | K | RK | benign            |
| rs9373475 | NP_115521 | V | M | VM | benign            |
| rs9373985 | NP_065228 | S | R | SR | probably damaging |



|           |           |   |   |    |                   |
|-----------|-----------|---|---|----|-------------------|
| rs9374088 | NP_073602 | N | S | NS | benign            |
| rs9374435 | NP_940870 | N | D | ND | benign            |
| rs9375966 | XP_371837 | F | S | FS | probably damaging |
| rs9376338 | NP_065073 | E | D | ED | benign            |
| rs9378251 | NP_000491 | P | L | PL | benign            |
| rs9378252 | NP_000491 | H | L | HL | probably damaging |
| rs9378517 | NP_958437 | E | Q | EQ | benign            |
| rs9379861 | NP_008978 | R | T | RT | possibly damaging |
| rs9380030 | NP_036499 | Q | R | QR | benign            |
| rs9380122 | NP_112221 | Y | H | YH | benign            |
| rs9380279 | NP_061978 | D | E | DE | benign            |
| rs9380281 | NP_004372 | V | G | VG | possibly damaging |
| rs9381199 | NP_056070 | T | I | TI | benign            |
| rs9381231 | NP_055595 | Q | R | QR | benign            |
| rs9381320 | NP_001244 | S | F | SF | possibly damaging |
| rs9381429 | XP_376503 | I | V | IV | benign            |
| rs9381472 | XP_166443 | Q | E | QE | benign            |
| rs9381594 | NP_722581 | I | V | IV | benign            |
| rs9381921 | NP_057579 | A | T | AT | benign            |
| rs9381994 | NP_619639 | Q | R | QR | benign            |
| rs9382400 | XP_294139 | S | F | SF | possibly damaging |
| rs9382581 | NP_110447 | G | S | GS | possibly damaging |
| rs9382657 | NP_065121 | D | Y | DY | benign            |
| rs9382658 | NP_065121 | P | L | PL | benign            |
| rs9383206 | NP_694548 | R | Q | RQ | benign            |
| rs9383583 | NP_631904 | R | H | RH | benign            |
| rs9383921 | NP_631904 | A | T | AT | benign            |
| rs9383993 | XP_293984 | Q | P | QP | probably damaging |
| rs9384063 | NP_061914 | A | T | AT | benign            |
| rs9386758 | NP_115507 | M | T | MT | possibly damaging |
| rs9386806 | NP_003071 | V | I | VI | benign            |
| rs9388450 | NP_036391 | D | G | DG | probably damaging |
| rs9388768 | XP_027074 | T | N | TN | benign            |
| rs9389004 | NP_778227 | A | T | AT | benign            |
| rs9390367 | NP_775105 | V | M | VM | benign            |
| rs9390578 | NP_056093 | L | F | LF | benign            |
| rs9390698 | NP_006819 | F | L | FL | benign            |
| rs9392161 | XP_498040 | Q | L | QL | possibly damaging |
| rs9393728 | NP_001723 | E | D | ED | benign            |
| rs9394021 | XP_373419 | R | Q | RQ | benign            |
| rs9394078 | NP_862825 | V | I | VI | benign            |
| rs9394286 | NP_689966 | G | V | GV | possibly damaging |
| rs9394345 | NP_057219 | A | T | AT | benign            |
| rs9394864 | XP_371820 | A | T | AT | benign            |
| rs9394866 | XP_371820 | L | P | LP | probably damaging |
| rs9395218 | NP_056049 | V | I | VI | benign            |

|           |           |   |   |    |                   |
|-----------|-----------|---|---|----|-------------------|
| rs9396920 | XP_498041 | R | W | RW | benign            |
| rs9396946 | NP_872358 | A | V | AV | benign            |
| rs9397053 | XP_498152 | N | T | NT | benign            |
| rs9397509 | NP_149062 | Q | R | QR | benign            |
| rs9397509 | NP_892006 | Q | R | QR | benign            |
| rs9397576 | NP_061914 | Q | R | QR | benign            |
| rs9398200 | NP_775943 | H | R | HR | benign            |
| rs9398250 | XP_498128 | R | H | RH | benign            |
| rs9405090 | NP_006772 | P | S | PS | benign            |
| rs9406415 | NP_997188 | C | R | CR | possibly damaging |
| rs9408538 | XP_376838 | E | Q | EQ | benign            |
| rs9410980 | XP_212241 | H | Y | HY | benign            |
| rs9410980 | XP_212238 | H | Y | HY | benign            |
| rs9414519 | XP_372092 | R | H | RH | benign            |
| rs9414519 | XP_497031 | R | H | RH | possibly damaging |
| rs9423502 | NP_055704 | L | V | LV | benign            |
| rs9423590 | XP_497211 | R | C | RC | benign            |
| rs9424711 | XP_496394 | I | M | IM | benign            |
| rs9424824 | XP_496391 | F | S | FS | benign            |
| rs9424824 | XP_375869 | F | S | FS | benign            |
| rs9424928 | XP_496391 | L | Q | LQ | benign            |
| rs9424928 | XP_375869 | L | Q | LQ | benign            |
| rs9425343 | NP_079467 | I | S | IS | benign            |
| rs9426009 | NP_694944 | R | C | RC | probably damaging |
| rs9426581 | NP_898885 | M | V | MV | benign            |
| rs9427170 | NP_689707 | T | I | TI | possibly damaging |
| rs9427398 | NP_067674 | Q | R | QR | benign            |
| rs9429157 | NP_079353 | R | H | RH | possibly damaging |
| rs9433502 | XP_370872 | D | N | DN | possibly damaging |
| rs9435714 | XP_371227 | D | H | DH | possibly damaging |
| rs9435724 | XP_371227 | R | Q | RQ | benign            |
| rs9435793 | XP_371227 | P | S | PS | benign            |
| rs9435890 | XP_372825 | A | T | AT | benign            |
| rs9435929 | XP_060309 | D | Y | DY | benign            |
| rs9435942 | XP_377644 | V | I | VI | possibly damaging |
| rs9435942 | XP_291645 | V | I | VI | possibly damaging |
| rs9435943 | XP_377644 | F | S | FS | possibly damaging |
| rs9435943 | XP_291645 | F | S | FS | possibly damaging |
| rs9436065 | XP_378901 | H | Y | HY | benign            |
| rs9436246 | XP_371257 | S | G | SG | benign            |
| rs9438113 | XP_496405 | M | V | MV | benign            |
| rs9439226 | XP_496541 | E | K | EK | benign            |
| rs9439336 | XP_377644 | S | T | ST | possibly damaging |
| rs9439336 | XP_291645 | S | T | ST | possibly damaging |
| rs9439337 | XP_377644 | H | Y | HY | probably damaging |
| rs9439337 | XP_291645 | H | Y | HY | probably damaging |

|           |           |   |   |    |                   |
|-----------|-----------|---|---|----|-------------------|
| rs9439338 | XP_291645 | K | M | KM | possibly damaging |
| rs9439338 | XP_377644 | K | M | KM | probably damaging |
| rs9439352 | XP_377644 | A | T | AT | benign            |
| rs9439352 | XP_291645 | A | T | AT | benign            |
| rs9439442 | NP_060658 | R | Q | RQ | benign            |
| rs9440631 | NP_689976 | H | Y | HY | possibly damaging |
| rs9441132 | NP_899228 | V | G | VG | possibly damaging |
| rs9441134 | NP_899228 | L | V | LV | benign            |
| rs9441420 | NP_056198 | T | A | TA | benign            |
| rs9441940 | NP_116279 | A | T | AT | benign            |
| rs9442084 | XP_496391 | N | K | NK | benign            |
| rs9442084 | XP_375869 | N | K | NK | benign            |
| rs9442114 | XP_375869 | P | S | PS | possibly damaging |
| rs9442115 | XP_375869 | L | V | LV | benign            |
| rs9442123 | XP_496391 | R | H | RH | benign            |
| rs9442123 | XP_375869 | R | H | RH | benign            |
| rs9442124 | XP_496391 | K | R | KR | benign            |
| rs9442124 | XP_375869 | K | R | KR | benign            |
| rs9442189 | NP_004061 | R | H | RH | possibly damaging |
| rs9442277 | XP_496343 | R | C | RC | probably damaging |
| rs9442277 | XP_496345 | R | C | RC | probably damaging |
| rs9442318 | XP_497652 | I | F | IF | benign            |
| rs9442320 | XP_497652 | R | H | RH | benign            |
| rs9442321 | XP_497652 | Q | E | QE | benign            |
| rs9442323 | XP_497652 | T | I | TI | benign            |
| rs9442345 | XP_496345 | A | P | AP | benign            |
| rs9442345 | XP_496343 | A | T | AT | benign            |
| rs9443201 | NP_001554 | G | V | GV | benign            |
| rs9443931 | XP_498110 | T | N | TN | benign            |
| rs9444039 | NP_055833 | Q | L | QL | benign            |
| rs9444489 | XP_048070 | D | N | DN | benign            |
| rs9446277 | XP_498113 | S | G | SG | benign            |
| rs9446983 | NP_598000 | G | V | GV | probably damaging |
| rs9448884 | NP_898871 | A | V | AV | benign            |
| rs9449444 | XP_371835 | A | V | AV | benign            |
| rs9449586 | NP_219479 | T | I | TI | benign            |
| rs9451263 | NP_055426 | R | G | RG | possibly damaging |
| rs9455142 | XP_371832 | I | V | IV | benign            |
| rs9455190 | XP_498113 | V | I | VI | benign            |
| rs9456735 | NP_004553 | M | L | ML | benign            |
| rs9457280 | XP_376554 | R | W | RW | possibly damaging |
| rs9457304 | NP_114155 | G | S | GS | benign            |
| rs9458138 | NP_064518 | V | M | VM | benign            |
| rs9459350 | NP_659417 | L | V | LV | benign            |
| rs9459903 | XP_376554 | R | P | RP | possibly damaging |
| rs9460608 | NP_060244 | K | R | KR | benign            |

|           |              |   |   |    |                   |
|-----------|--------------|---|---|----|-------------------|
| rs9460973 | NP_057440    | K | N | KN | benign            |
| rs9461446 | XP_167149    | H | Y | HY | benign            |
| rs9461544 | XP_294093    | N | S | NS | benign            |
| rs9461623 | XP_376479    | S | P | SP | benign            |
| rs9461742 | NP_062548    | V | M | VM | benign            |
| rs9461899 | NP_002215    | L | V | LV | benign            |
| rs9462487 | NP_003731    | P | T | PT | benign            |
| rs9463210 | XP_291181    | A | S | AS | benign            |
| rs9463234 | XP_166443    | I | M | IM | benign            |
| rs9464003 | NP_112534    | F | L | FL | probably damaging |
| rs9464003 | NP_036373    | F | L | FL | probably damaging |
| rs9464337 | NP_110447    | A | D | AD | benign            |
| rs9464393 | NP_899236    | V | A | VA | benign            |
| rs9464393 | NP_056363    | V | A | VA | benign            |
| rs9465882 | NP_060244    | E | K | EK | benign            |
| rs9467010 | NP_001482    | E | K | EK | possibly damaging |
| rs9467010 | NP_663624    | E | K | EK | possibly damaging |
| rs9467010 | NP_663630    | E | K | EK | possibly damaging |
| rs9467927 | XP_496798    | M | T | MT | benign            |
| rs9468790 | NP_001081    | D | H | DH | probably damaging |
| rs9469052 | NP_079534    | R | H | RH | benign            |
| rs9469073 | NP_000583    | L | V | LV | benign            |
| rs9469073 | NP_001002029 | L | V | LV | benign            |
| rs9469081 | NP_061978    | V | M | VM | benign            |
| rs9469203 | NP_002113    | A | T | AT | benign            |
| rs9469319 | NP_006111    | V | M | VM | benign            |
| rs9469425 | NP_689948    | A | G | AG | benign            |
| rs9469559 | NP_002215    | R | H | RH | possibly damaging |
| rs9469912 | NP_060224    | S | N | SN | benign            |
| rs9469913 | NP_060224    | Q | H | QH | benign            |
| rs9470262 | NP_057219    | H | Y | HY | possibly damaging |
| rs9471515 | NP_937796    | T | K | TK | benign            |
| rs9471577 | NP_004819    | M | V | MV | benign            |
| rs9471761 | XP_371820    | C | R | CR | probably damaging |
| rs9471966 | NP_612153    | V | I | VI | benign            |
| rs9471969 | NP_006577    | S | I | SI | benign            |
| rs9471979 | NP_000278    | Q | P | QP | possibly damaging |
| rs9472017 | NP_002812    | E | D | ED | benign            |
| rs9472017 | NP_690622    | E | D | ED | benign            |
| rs9472017 | NP_690621    | E | D | ED | benign            |
| rs9472017 | NP_690620    | E | D | ED | benign            |
| rs9472017 | NP_690619    | E | D | ED | benign            |
| rs9473556 | NP_000246    | T | A | TA | benign            |
| rs9473558 | NP_000246    | H | R | HR | benign            |
| rs9474034 | NP_619639    | V | I | VI | benign            |
| rs9475076 | XP_294139    | S | R | SR | benign            |

|           |              |   |   |    |                   |
|-----------|--------------|---|---|----|-------------------|
| rs9475077 | XP_294139    | T | N | TN | benign            |
| rs9475437 | NP_066551    | H | Y | HY | possibly damaging |
| rs9475580 | NP_110447    | A | T | AT | benign            |
| rs9475725 | NP_065121    | Q | P | QP | benign            |
| rs9477211 | NP_694548    | T | I | TI | benign            |
| rs9477310 | NP_694548    | S | L | SL | benign            |
| rs9478144 | NP_116221    | G | R | GR | possibly damaging |
| rs9478198 | NP_005091    | R | L | RL | benign            |
| rs9478198 | NP_653080    | R | L | RL | benign            |
| rs9478945 | NP_116221    | T | M | TM | benign            |
| rs9479297 | NP_149062    | K | R | KR | benign            |
| rs9479297 | NP_892006    | K | R | KR | benign            |
| rs9479413 | NP_570970    | L | P | LP | probably damaging |
| rs9481410 | NP_940870    | M | T | MT | benign            |
| rs9483934 | NP_005914    | K | N | KN | benign            |
| rs9486039 | NP_671488    | M | I | MI | benign            |
| rs9488991 | XP_496824    | N | H | NH | benign            |
| rs9489056 | NP_775831    | A | E | AE | benign            |
| rs9489124 | NP_002935    | E | K | EK | benign            |
| rs9490642 | XP_069035    | N | K | NK | benign            |
| rs9491553 | NP_068592    | A | T | AT | benign            |
| rs9493386 | NP_003958    | V | L | VL | benign            |
| rs9493627 | NP_004091    | G | S | GS | benign            |
| rs9493627 | NP_742103    | G | S | GS | benign            |
| rs9494888 | NP_067633    | H | N | HN | possibly damaging |
| rs9495391 | XP_371849    | A | P | AP | possibly damaging |
| rs9495392 | XP_371849    | I | T | IT | benign            |
| rs9496104 | XP_496827    | K | E | KE | benign            |
| rs9497606 | XP_371850    | I | T | IT | benign            |
| rs9497983 | NP_006819    | V | I | VI | benign            |
| rs9498146 | NP_005706    | M | L | ML | benign            |
| rs9501302 | XP_498072    | C | W | CW | probably damaging |
| rs9501600 | NP_115859    | A | T | AT | benign            |
| rs9501603 | NP_000583    | A | S | AS | benign            |
| rs9501603 | NP_001002029 | A | S | AS | benign            |
| rs9502889 | NP_150285    | P | T | PT | benign            |
| rs9502890 | NP_150285    | P | Q | PQ | benign            |
| rs9502980 | NP_001444    | V | L | VL | benign            |
| rs9503893 | NP_789770    | V | I | VI | benign            |
| rs9507413 | NP_112567    | S | G | SG | benign            |
| rs9507425 | NP_061911    | K | E | KE | benign            |
| rs9508680 | NP_115492    | D | N | DN | benign            |
| rs9509307 | NP_006522    | S | N | SN | benign            |
| rs9509307 | NP_783195    | S | N | SN | benign            |
| rs9509379 | XP_293177    | F | C | FC | probably damaging |
| rs9509472 | XP_165533    | I | V | IV | benign            |

|           |           |   |   |    |                   |
|-----------|-----------|---|---|----|-------------------|
| rs9511510 | NP_060921 | P | T | PT | possibly damaging |
| rs9512318 | NP_006637 | R | H | RH | possibly damaging |
| rs9513501 | NP_056111 | Q | H | QH | possibly damaging |
| rs9514066 | NP_000114 | R | G | RG | benign            |
| rs9514067 | NP_000114 | R | G | RG | benign            |
| rs9515235 | NP_001837 | L | M | LM | benign            |
| rs9516771 | NP_703157 | K | R | KR | benign            |
| rs9525072 | NP_064506 | F | L | FL | probably damaging |
| rs9525320 | NP_542418 | A | T | AT | benign            |
| rs9525320 | NP_075387 | A | T | AT | benign            |
| rs9525983 | NP_904358 | P | S | PS | benign            |
| rs9527025 | NP_004786 | C | S | CS | benign            |
| rs9527025 | NP_710150 | C | S | CS | benign            |
| rs9531945 | NP_116238 | G | R | GR | possibly damaging |
| rs9532758 | NP_004285 | N | S | NS | benign            |
| rs9533168 | NP_689538 | K | N | KN | benign            |
| rs9534264 | NP_055885 | D | E | DE | benign            |
| rs9534899 | NP_003841 | A | P | AP | possibly damaging |
| rs9536041 | NP_954872 | K | R | KR | benign            |
| rs9536041 | NP_061146 | K | R | KR | benign            |
| rs9536062 | NP_954872 | R | G | RG | possibly damaging |
| rs9536062 | NP_061146 | R | G | RG | possibly damaging |
| rs9536314 | NP_004786 | F | V | FV | possibly damaging |
| rs9536314 | NP_710150 | F | V | FV | possibly damaging |
| rs9538805 | XP_497376 | M | L | ML | benign            |
| rs9543107 | NP_079084 | S | L | SL | possibly damaging |
| rs9547378 | NP_115605 | P | R | PR | probably damaging |
| rs9547952 | NP_006466 | V | M | VM | benign            |
| rs9548505 | XP_292193 | R | C | RC | probably damaging |
| rs9548506 | XP_292193 | T | S | TS | benign            |
| rs9550987 | NP_683760 | S | T | ST | benign            |
| rs9550987 | NP_061117 | S | T | ST | benign            |
| rs9551156 | NP_061911 | S | F | SF | benign            |
| rs9551530 | NP_861450 | A | P | AP | benign            |
| rs9552017 | NP_055057 | L | I | LI | benign            |
| rs9552254 | NP_006522 | S | G | SG | benign            |
| rs9552254 | NP_783195 | S | G | SG | benign            |
| rs9552285 | NP_071904 | T | A | TA | benign            |
| rs9552930 | NP_055178 | S | G | SG | benign            |
| rs9554607 | NP_004791 | P | H | PH | probably damaging |
| rs9557582 | NP_443099 | L | M | LM | benign            |
| rs9557636 | NP_443099 | A | D | AD | benign            |
| rs9561921 | NP_055749 | T | M | TM | benign            |
| rs9561921 | NP_945319 | T | M | TM | benign            |
| rs9562353 | XP_038664 | R | G | RG | probably damaging |
| rs9562362 | XP_038664 | R | H | RH | benign            |

|           |           |   |   |    |                   |
|-----------|-----------|---|---|----|-------------------|
| rs9562936 | XP_166966 | G | S | GS | benign            |
| rs9566725 | NP_004285 | L | V | LV | benign            |
| rs9567973 | NP_003841 | L | V | LV | benign            |
| rs9568497 | NP_004120 | Y | C | YC | probably damaging |
| rs9568672 | XP_062912 | F | L | FL | benign            |
| rs9568878 | NP_821074 | T | M | TM | benign            |
| rs9568878 | NP_821075 | T | M | TM | benign            |
| rs9568878 | NP_443083 | T | M | TM | benign            |
| rs9571019 | XP_375027 | F | L | FL | benign            |
| rs9574632 | NP_005833 | Q | H | QH | possibly damaging |
| rs9576175 | NP_660204 | E | D | ED | benign            |
| rs9576298 | XP_375018 | R | S | RS | benign            |
| rs9577273 | NP_612439 | A | V | AV | benign            |
| rs9578190 | NP_005791 | S | C | SC | benign            |
| rs9578255 | NP_068773 | M | I | MI | probably damaging |
| rs9578751 | NP_006428 | S | N | SN | benign            |
| rs9579717 | NP_055057 | C | F | CF | benign            |
| rs9579718 | NP_055057 | I | V | IV | benign            |
| rs9579953 | XP_208097 | S | R | SR | benign            |
| rs9580914 | NP_694568 | S | N | SN | benign            |
| rs9581043 | NP_006428 | V | I | VI | benign            |
| rs9581180 | NP_112567 | G | S | GS | benign            |
| rs9584741 | NP_002262 | E | K | EK | benign            |
| rs9591299 | NP_055847 | I | V | IV | benign            |
| rs9591299 | NP_057012 | I | V | IV | benign            |
| rs9591591 | XP_370727 | S | A | SA | benign            |
| rs9593132 | NP_005349 | R | C | RC | benign            |
| rs9594182 | NP_037470 | Q | H | QH | possibly damaging |
| rs9594223 | NP_006466 | T | I | TI | possibly damaging |
| rs9596693 | NP_116567 | T | A | TA | benign            |
| rs9596693 | NP_002581 | T | A | TA | benign            |
| rs9599258 | XP_497378 | H | Y | HY | probably damaging |
| rs9600066 | NP_001721 | L | M | LM | benign            |
| rs9600455 | XP_375032 | T | M | TM | possibly damaging |
| rs9603462 | XP_292193 | Q | H | QH | possibly damaging |
| rs9603498 | XP_370722 | L | R | LR | possibly damaging |
| rs9605067 | NP_073564 | L | I | LI | benign            |
| rs9605067 | NP_892029 | L | I | LI | benign            |
| rs9605539 | NP_059110 | D | A | DA | probably damaging |
| rs9605924 | NP_005128 | R | H | RH | benign            |
| rs9606030 | NP_003495 | E | G | EG | benign            |
| rs9606040 | NP_003495 | T | I | TI | possibly damaging |
| rs9606199 | NP_001661 | P | H | PH | possibly damaging |
| rs9606253 | NP_073557 | K | N | KN | benign            |
| rs9606739 | NP_777637 | R | G | RG | possibly damaging |
| rs9606756 | NP_000346 | I | V | IV | benign            |

|           |           |   |   |    |                   |
|-----------|-----------|---|---|----|-------------------|
| rs9606877 | XP_376007 | T | P | TP | benign            |
| rs9607476 | NP_006489 | A | P | AP | benign            |
| rs9607793 | NP_060060 | D | N | DN | benign            |
| rs9607828 | NP_004999 | E | D | ED | benign            |
| rs9607957 | NP_055385 | S | G | SG | benign            |
| rs9608213 | NP_110434 | R | Q | RQ | benign            |
| rs9608246 | NP_036427 | L | V | LV | benign            |
| rs9608278 | XP_086876 | G | A | GA | benign            |
| rs9608378 | NP_004067 | H | D | HD | benign            |
| rs9608659 | NP_056096 | V | M | VM | benign            |
| rs9608893 | XP_117224 | L | V | LV | benign            |
| rs9608948 | NP_055163 | R | C | RC | possibly damaging |
| rs9608948 | XP_496502 | R | C | RC | probably damaging |
| rs9608949 | NP_055364 | R | Q | RQ | benign            |
| rs9608956 | NP_777637 | S | G | SG | possibly damaging |
| rs9608973 | XP_496524 | R | G | RG | probably damaging |
| rs9609261 | XP_496527 | T | P | TP | benign            |
| rs9609909 | NP_689825 | R | H | RH | benign            |
| rs9610522 | NP_079231 | V | I | VI | benign            |
| rs9610595 | NP_000622 | S | N | SN | benign            |
| rs9610595 | NP_038202 | S | N | SN | benign            |
| rs9610624 | NP_848647 | Y | C | YC | probably damaging |
| rs9610645 | NP_055449 | R | C | RC | benign            |
| rs9610728 | NP_003926 | D | N | DN | benign            |
| rs9610775 | NP_055365 | Q | R | QR | benign            |
| rs9610842 | NP_619538 | R | P | RP | possibly damaging |
| rs9610842 | NP_008963 | R | P | RP | probably damaging |
| rs9610856 | NP_057175 | Y | H | YH | possibly damaging |
| rs9610875 | NP_203744 | A | S | AS | benign            |
| rs9611185 | NP_002400 | G | S | GS | possibly damaging |
| rs9611217 | NP_689725 | I | M | IM | benign            |
| rs9611338 | NP_056520 | W | R | WR | probably damaging |
| rs9611697 | NP_061979 | Q | H | QH | possibly damaging |
| rs9611697 | NP_663786 | Q | H | QH | possibly damaging |
| rs9611842 | NP_059132 | P | T | PT | benign            |
| rs9612720 | XP_496520 | A | T | AT | benign            |
| rs9613015 | NP_115997 | T | I | TI | benign            |
| rs9613558 | NP_056096 | A | P | AP | benign            |
| rs9613680 | NP_775781 | S | N | SN | benign            |
| rs9613850 | NP_036397 | S | C | SC | benign            |
| rs9613866 | NP_001118 | A | V | AV | benign            |
| rs9613866 | NP_663782 | A | V | AV | benign            |
| rs9614382 | NP_073622 | A | V | AV | benign            |
| rs9614382 | NP_942153 | A | V | AV | benign            |
| rs9614646 | NP_683515 | F | L | FL | probably damaging |
| rs9614653 | NP_683515 | R | Q | RQ | benign            |



|           |           |   |   |    |                   |
|-----------|-----------|---|---|----|-------------------|
| rs9614957 | NP_851851 | P | R | PR | probably damaging |
| rs9614957 | NP_851852 | P | R | PR | probably damaging |
| rs9615313 | NP_006062 | S | C | SC | benign            |
| rs9615351 | NP_055061 | E | Q | EQ | benign            |
| rs9616149 | NP_055161 | C | G | CG | probably damaging |
| rs9616787 | NP_149977 | A | T | AT | benign            |
| rs9616851 | NP_002963 | F | L | FL | possibly damaging |
| rs9616915 | XP_037493 | I | T | IT | benign            |
| rs9617013 | NP_002963 | A | V | AV | benign            |
| rs9617016 | NP_002963 | K | E | KE | benign            |
| rs9617048 | NP_065194 | S | C | SC | benign            |
| rs9617621 | XP_032996 | R | W | RW | possibly damaging |
| rs9618591 | NP_003495 | S | N | SN | benign            |
| rs9618779 | XP_496493 | D | N | DN | benign            |
| rs9619014 | XP_496490 | R | Q | RQ | benign            |
| rs9619258 | NP_006595 | D | N | DN | benign            |
| rs9619954 | XP_377720 | D | N | DN | benign            |
| rs9619955 | XP_377720 | Q | R | QR | benign            |
| rs9620354 | NP_036427 | H | R | HR | probably damaging |
| rs9620392 | NP_057411 | F | L | FL | benign            |
| rs9620700 | NP_653305 | A | D | AD | possibly damaging |
| rs9620774 | XP_375963 | R | C | RC | possibly damaging |
| rs9620938 | NP_694690 | A | V | AV | benign            |
| rs9620938 | NP_694691 | A | V | AV | benign            |
| rs9620938 | NP_066576 | A | V | AV | benign            |
| rs9621049 | NP_000346 | S | F | SF | benign            |
| rs9621295 | XP_038520 | R | H | RH | possibly damaging |
| rs9621427 | NP_006595 | L | M | LM | benign            |
| rs9622227 | NP_055125 | D | N | DN | possibly damaging |
| rs9622924 | NP_068594 | R | C | RC | probably damaging |
| rs9623417 | XP_039495 | D | N | DN | benign            |
| rs9624038 | NP_004905 | E | K | EK | benign            |
| rs9624393 | NP_036427 | S | R | SR | possibly damaging |
| rs9624395 | NP_036427 | R | S | RS | benign            |
| rs9624909 | NP_115997 | L | S | LS | benign            |
| rs9625412 | XP_375963 | G | C | GC | benign            |
| rs9626010 | NP_073622 | L | F | LF | benign            |
| rs9626010 | NP_942153 | L | F | LF | benign            |
| rs9626584 | NP_851851 | S | N | SN | benign            |
| rs9626585 | NP_851851 | R | C | RC | probably damaging |
| rs9626829 | NP_006062 | V | I | VI | benign            |
| rs9627529 | XP_027105 | S | L | SL | benign            |
| rs9628204 | NP_001944 | G | R | GR | probably damaging |
| rs9628306 | NP_065194 | V | M | VM | benign            |
| rs9628315 | XP_104657 | E | K | EK | benign            |
| rs9628637 | NP_004805 | D | N | DN | possibly damaging |

|           |           |   |   |    |                   |
|-----------|-----------|---|---|----|-------------------|
| rs9629827 | NP_002735 | F | L | FL | probably damaging |
| rs9631548 | XP_171032 | H | D | HD | probably damaging |
| rs9631887 | XP_496692 | V | L | VL | benign            |
| rs9632073 | XP_496692 | V | F | VF | benign            |
| rs9633034 | XP_498328 | L | F | LF | benign            |
| rs9633035 | XP_498326 | H | R | HR | probably damaging |
| rs9633035 | XP_498328 | H | R | HR | probably damaging |
| rs9633036 | XP_498328 | K | N | KN | benign            |
| rs9633036 | XP_498326 | K | N | KN | possibly damaging |
| rs9633063 | XP_498326 | Y | C | YC | benign            |
| rs9633063 | XP_498328 | Y | C | YC | benign            |
| rs9633064 | XP_498326 | G | D | GD | benign            |
| rs9633064 | XP_498328 | G | D | GD | benign            |
| rs9635306 | NP_004203 | G | E | GE | probably damaging |
| rs9635771 | NP_002975 | M | V | MV | benign            |
| rs9635772 | NP_002975 | P | L | PL | possibly damaging |
| rs9636110 | NP_848589 | E | K | EK | benign            |
| rs9636139 | NP_079316 | T | I | TI | possibly damaging |
| rs9636610 | NP_000810 | V | I | VI | benign            |
| rs9636819 | NP_071419 | T | A | TA | benign            |
| rs9636845 | NP_787054 | C | S | CS | probably damaging |
| rs9637217 | NP_059141 | R | K | RK | benign            |
| rs9637517 | XP_171054 | F | L | FL | benign            |
| rs9640663 | NP_002826 | I | V | IV | benign            |
| rs9642785 | NP_056250 | Q | H | QH | benign            |
| rs9642785 | NP_904355 | Q | H | QH | benign            |
| rs9643859 | NP_659441 | L | V | LV | benign            |
| rs9645916 | NP_078813 | T | P | TP | possibly damaging |
| rs9646748 | NP_060164 | G | R | GR | benign            |
| rs9646779 | NP_004516 | R | Q | RQ | benign            |
| rs9647397 | NP_598334 | V | A | VA | benign            |
| rs9647397 | NP_002932 | V | A | VA | benign            |
| rs9647503 | XP_496692 | C | R | CR | probably damaging |
| rs9647512 | XP_496692 | A | V | AV | benign            |
| rs9647513 | XP_496692 | L | F | LF | benign            |
| rs9648837 | XP_377976 | A | D | AD | benign            |
| rs9649951 | NP_055758 | V | M | VM | benign            |
| rs9651057 | XP_496428 | Q | R | QR | benign            |
| rs9651492 | NP_000305 | D | H | DH | possibly damaging |
| rs9652549 | XP_208847 | W | L | WL | possibly damaging |
| rs9652549 | XP_497431 | W | L | WL | probably damaging |
| rs9652588 | NP_777584 | G | E | GE | possibly damaging |
| rs9652589 | NP_777584 | R | K | RK | benign            |
| rs9652855 | NP_060233 | P | R | PR | probably damaging |
| rs9653154 | XP_290865 | V | L | VL | benign            |
| rs9653599 | NP_056156 | L | V | LV | benign            |

|           |           |   |   |    |                   |
|-----------|-----------|---|---|----|-------------------|
| rs9655651 | NP_004659 | L | I | LI | benign            |
| rs9655672 | XP_294316 | A | T | AT | benign            |
| rs9656065 | XP_168583 | R | Q | RQ | benign            |
| rs9656982 | NP_620172 | M | T | MT | benign            |
| rs9657362 | NP_055444 | L | F | LF | benign            |
| rs9657963 | NP_001552 | A | T | AT | benign            |
| rs9657965 | NP_001552 | K | N | KN | benign            |
| rs9657979 | NP_001552 | A | D | AD | benign            |
| rs9658279 | NP_000611 | P | S | PS | benign            |
| rs9658356 | NP_000611 | D | A | DA | benign            |
| rs9658403 | NP_000611 | N | D | ND | benign            |
| rs9658445 | NP_000611 | G | D | GD | benign            |
| rs9658482 | NP_000611 | Q | R | QR | possibly damaging |
| rs9658587 | NP_001545 | R | W | RW | probably damaging |
| rs9658616 | NP_002169 | R | G | RG | possibly damaging |
| rs9658625 | NP_003569 | E | G | EG | possibly damaging |
| rs9658650 | NP_001266 | E | G | EG | probably damaging |
| rs9658654 | NP_001266 | E | K | EK | benign            |
| rs9658655 | NP_001266 | E | D | ED | benign            |
| rs9658662 | NP_001266 | R | W | RW | benign            |
| rs9658663 | NP_001266 | A | G | AG | benign            |
| rs9658664 | NP_001266 | G | S | GS | possibly damaging |
| rs9658665 | NP_001266 | L | P | LP | benign            |
| rs9658667 | NP_001266 | G | S | GS | possibly damaging |
| rs9658668 | NP_001266 | P | L | PL | benign            |
| rs9658669 | NP_001266 | R | Q | RQ | possibly damaging |
| rs9658928 | XP_496351 | G | S | GS | benign            |
| rs9659529 | NP_075390 | T | R | TR | possibly damaging |
| rs9659602 | NP_005716 | R | L | RL | possibly damaging |
| rs9659608 | NP_002146 | A | S | AS | benign            |
| rs9660322 | NP_653174 | R | K | RK | benign            |
| rs9661554 | NP_075390 | R | S | RS | probably damaging |
| rs9661731 | XP_498818 | W | R | WR | possibly damaging |
| rs9661732 | XP_498818 | L | S | LS | benign            |
| rs9662001 | XP_496692 | S | F | SF | benign            |
| rs9663081 | XP_371304 | E | D | ED | benign            |
| rs9663081 | XP_371302 | E | D | ED | benign            |
| rs9663920 | NP_071407 | D | N | DN | benign            |
| rs9664466 | NP_060497 | C | F | CF | probably damaging |
| rs9664945 | NP_940898 | A | T | AT | benign            |
| rs9665346 | NP_937868 | G | R | GR | benign            |
| rs9665861 | NP_006628 | V | I | VI | benign            |
| rs9666086 | NP_006628 | F | S | FS | possibly damaging |
| rs9666257 | NP_004696 | S | T | ST | benign            |
| rs9666380 | NP_004696 | Y | C | YC | possibly damaging |
| rs9666607 | NP_000601 | R | K | RK | benign            |

|           |           |   |   |    |                   |
|-----------|-----------|---|---|----|-------------------|
| rs9666739 | NP_004696 | H | N | HN | probably damaging |
| rs9666809 | NP_065091 | C | R | CR | probably damaging |
| rs9666819 | NP_065091 | V | A | VA | benign            |
| rs9666847 | NP_068373 | P | S | PS | benign            |
| rs9666948 | NP_065091 | K | R | KR | benign            |
| rs9666956 | NP_065091 | Y | C | YC | probably damaging |
| rs9667009 | NP_694997 | Q | R | QR | benign            |
| rs9667365 | NP_065091 | R | W | RW | possibly damaging |
| rs9667990 | NP_003632 | A | P | AP | benign            |
| rs9668527 | NP_061959 | V | M | VM | benign            |
| rs9668786 | XP_209597 | V | M | VM | benign            |
| rs9671369 | NP_689805 | T | M | TM | benign            |
| rs9672065 | NP_071934 | G | S | GS | benign            |
| rs9672139 | XP_290629 | M | L | ML | benign            |
| rs9673015 | XP_373616 | P | Q | PQ | benign            |
| rs9673026 | XP_375247 | R | M | RM | benign            |
| rs9673733 | NP_958802 | S | C | SC | possibly damaging |
| rs9673733 | NP_963892 | S | C | SC | possibly damaging |
| rs9674145 | NP_689672 | L | S | LS | benign            |
| rs9674961 | XP_290768 | S | N | SN | benign            |
| rs9675246 | NP_003762 | R | Q | RQ | possibly damaging |
| rs9675365 | XP_371111 | F | L | FL | benign            |
| rs9676012 | XP_371111 | R | C | RC | possibly damaging |
| rs9676259 | NP_065931 | G | S | GS | benign            |
| rs9676419 | NP_114147 | M | V | MV | benign            |
| rs9676436 | NP_443116 | E | A | EA | benign            |
| rs9677004 | NP_065931 | T | A | TA | benign            |
| rs9677948 | NP_689598 | A | V | AV | benign            |
| rs9678851 | NP_060628 | T | P | TP | possibly damaging |
| rs9679004 | NP_060628 | R | C | RC | possibly damaging |
| rs9680520 | XP_372891 | Q | H | QH | benign            |
| rs9680526 | NP_062547 | S | T | ST | benign            |
| rs9680605 | XP_372891 | N | S | NS | benign            |
| rs9680797 | NP_699165 | P | L | PL | probably damaging |
| rs9680797 | NP_878315 | P | L | PL | probably damaging |
| rs9683564 | NP_689988 | S | L | SL | possibly damaging |
| rs9684120 | XP_497976 | H | R | HR | probably damaging |
| rs9684786 | NP_775931 | G | D | GD | benign            |
| rs9685645 | NP_058646 | I | V | IV | benign            |
| rs9686117 | XP_373053 | T | M | TM | benign            |
| rs9686309 | XP_373053 | R | G | RG | possibly damaging |
| rs9686540 | NP_113683 | E | K | EK | benign            |
| rs9686540 | NP_113684 | E | K | EK | benign            |
| rs9686540 | NP_061728 | E | K | EK | benign            |
| rs9687038 | XP_209704 | F | I | FI | benign            |
| rs9687593 | NP_060899 | A | V | AV | benign            |

|           |           |   |   |    |                   |
|-----------|-----------|---|---|----|-------------------|
| rs9687945 | NP_510968 | F | L | FL | benign            |
| rs9687959 | XP_373053 | A | T | AT | benign            |
| rs9688544 | XP_496798 | V | L | VL | benign            |
| rs9688769 | XP_496798 | G | C | GC | probably damaging |
| rs9689241 | NP_996791 | Y | S | YS | benign            |
| rs9689248 | NP_996791 | I | V | IV | benign            |
| rs9690250 | XP_379488 | L | H | LH | benign            |
| rs9690800 | XP_379488 | S | R | SR | benign            |
| rs9691650 | NP_775949 | K | M | KM | possibly damaging |
| rs9692271 | XP_499090 | G | A | GA | benign            |
| rs9692676 | XP_209910 | I | L | IL | benign            |
| rs9693154 | NP_803875 | V | A | VA | benign            |
| rs9693865 | XP_209910 | R | P | RP | possibly damaging |
| rs9693999 | NP_620172 | E | K | EK | benign            |
| rs9694043 | XP_376756 | T | A | TA | benign            |
| rs9694757 | XP_373243 | S | R | SR | benign            |
| rs9694759 | XP_373243 | P | L | PL | possibly damaging |
| rs9694780 | XP_373243 | T | M | TM | benign            |
| rs9694942 | XP_498268 | G | E | GE | benign            |
| rs9696000 | XP_088525 | R | Q | RQ | benign            |
| rs9696234 | XP_095991 | F | S | FS | benign            |
| rs9696578 | NP_937895 | R | L | RL | probably damaging |
| rs9697215 | NP_057119 | R | Q | RQ | benign            |
| rs9697293 | XP_372195 | Q | R | QR | benign            |
| rs9697983 | NP_036216 | S | A | SA | benign            |
| rs9700408 | XP_496332 | S | N | SN | benign            |
| rs9701796 | NP_689418 | C | S | CS | probably damaging |
| rs9701962 | XP_291396 | H | R | HR | benign            |
| rs9710741 | XP_377778 | C | G | CG | probably damaging |
| rs9713272 | XP_376653 | R | C | RC | possibly damaging |
| rs9713744 | XP_371630 | P | A | PA | possibly damaging |
| rs9717366 | XP_496798 | R | S | RS | benign            |
| rs9717478 | XP_496798 | K | N | KN | benign            |
| rs9718512 | XP_295213 | P | S | PS | probably damaging |
| rs9720197 | XP_373243 | H | Y | HY | benign            |
| rs9720235 | XP_373243 | V | I | VI | benign            |
| rs9721012 | XP_373243 | S | R | SR | benign            |
| rs9722517 | XP_498326 | T | I | TI | benign            |
| rs9722517 | XP_498328 | T | I | TI | benign            |
| rs9723115 | XP_372191 | A | V | AV | benign            |
| rs9724009 | NP_005368 | E | D | ED | benign            |
| rs9724194 | XP_208423 | L | F | LF | possibly damaging |
| rs9724654 | XP_291395 | M | T | MT | benign            |
| rs9725423 | NP_055816 | V | G | VG | possibly damaging |
| rs9725770 | XP_496391 | E | A | EA | possibly damaging |
| rs9725770 | XP_375869 | E | A | EA | possibly damaging |

|           |           |   |   |    |                   |
|-----------|-----------|---|---|----|-------------------|
| rs9726290 | XP_496343 | S | G | SG | benign            |
| rs9726290 | XP_496345 | S | G | SG | benign            |
| rs9727080 | NP_056198 | Q | P | QP | benign            |
| rs9728577 | NP_075390 | E | K | EK | benign            |
| rs9729276 | NP_005946 | P | S | PS | benign            |
| rs9729630 | XP_496448 | T | S | TS | benign            |
| rs9730002 | XP_375869 | M | I | MI | possibly damaging |
| rs9730002 | XP_496391 | M | I | MI | probably damaging |
| rs9740587 | XP_165533 | I | V | IV | benign            |
| rs9743610 | XP_497418 | P | L | PL | probably damaging |
| rs9745522 | NP_061982 | D | E | DE | benign            |
| rs9746478 | NP_001941 | N | S | NS | benign            |
| rs9746539 | XP_377407 | S | G | SG | benign            |
| rs9747229 | XP_371089 | R | P | RP | benign            |
| rs9747481 | XP_371089 | R | C | RC | benign            |
| rs9747577 | XP_371089 | S | G | SG | benign            |
| rs9748611 | XP_371111 | V | M | VM | benign            |
| rs9752887 | XP_371495 | M | T | MT | benign            |
| rs9754221 | NP_000865 | K | N | KN | benign            |
| rs9754221 | NP_997467 | K | N | KN | benign            |
| rs9754221 | NP_997468 | K | N | KN | benign            |
| rs9754445 | XP_372891 | H | Q | HQ | benign            |
| rs9754477 | XP_372891 | A | T | AT | benign            |
| rs9760377 | NP_787114 | V | A | VA | benign            |
| rs9762106 | NP_787114 | H | D | HD | probably damaging |
| rs9762117 | NP_787114 | V | M | VM | benign            |
| rs9762741 | XP_497958 | L | F | LF | benign            |
| rs9768124 | NP_005605 | I | M | IM | benign            |
| rs9768425 | XP_373223 | G | R | GR | benign            |
| rs9768449 | XP_373223 | E | K | EK | benign            |
| rs9769523 | NP_982255 | E | K | EK | benign            |
| rs9769523 | NP_066953 | E | K | EK | benign            |
| rs9772659 | XP_499103 | P | R | PR | probably damaging |
| rs9772727 | XP_498273 | E | D | ED | benign            |
| rs9774383 | XP_499103 | K | N | KN | benign            |
| rs9774677 | NP_803875 | D | E | DE | benign            |
| rs9776578 | NP_954714 | L | M | LM | benign            |
| rs9781594 | XP_498374 | S | L | SL | benign            |
| rs9782980 | NP_689820 | C | G | CG | probably damaging |
| rs9783355 | XP_372354 | P | H | PH | probably damaging |
| rs9783569 | XP_116980 | G | S | GS | benign            |
| rs9784427 | XP_039169 | R | H | RH | benign            |
| rs9788233 | NP_116069 | R | G | RG | possibly damaging |
| rs9788592 | XP_208766 | G | E | GE | benign            |
| rs9790914 | XP_371731 | V | M | VM | benign            |
| rs9790916 | NP_005500 | V | M | VM | benign            |

|           |           |   |   |    |                   |
|-----------|-----------|---|---|----|-------------------|
| rs9791092 | NP_005500 | T | S | TS | benign            |
| rs9791685 | XP_373223 | L | P | LP | possibly damaging |
| rs9792879 | NP_114127 | P | S | PS | possibly damaging |
| rs9792997 | NP_114127 | Y | H | YH | benign            |
| rs9794035 | NP_817124 | T | A | TA | probably damaging |
| rs9796510 | XP_496031 | V | I | VI | benign            |
| rs9796636 | XP_497472 | R | S | RS | benign            |
| rs9797512 | XP_371155 | R | H | RH | benign            |
| rs9797535 | XP_371155 | W | R | WR | benign            |
| rs9797600 | XP_371155 | E | G | EG | benign            |
| rs9797605 | XP_371155 | A | S | AS | benign            |
| rs9801180 | XP_379488 | E | A | EA | benign            |
| rs9801888 | XP_496941 | P | S | PS | possibly damaging |
| rs9802078 | XP_496941 | T | A | TA | benign            |
| rs9802080 | XP_496941 | R | W | RW | possibly damaging |
| rs9802082 | XP_496941 | S | G | SG | benign            |
| rs9802130 | XP_209910 | M | T | MT | benign            |
| rs9802152 | NP_078997 | D | H | DH | possibly damaging |
| rs9803005 | NP_997301 | T | A | TA | benign            |
| rs9803965 | NP_015563 | Y | C | YC | benign            |
| rs9803965 | NP_015562 | Y | C | YC | benign            |
| rs9803965 | NP_004790 | Y | C | YC | benign            |
| rs9804140 | NP_001739 | K | R | KR | benign            |
| rs9804460 | NP_036285 | A | V | AV | benign            |
| rs9804905 | NP_476511 | N | S | NS | benign            |
| rs9804905 | NP_055591 | N | S | NS | benign            |
| rs9804905 | NP_631940 | N | S | NS | benign            |
| rs9804905 | NP_476510 | N | S | NS | benign            |
| rs9806123 | NP_060328 | P | R | PR | possibly damaging |
| rs9806859 | NP_958802 | R | W | RW | probably damaging |
| rs9806859 | NP_963892 | R | W | RW | probably damaging |
| rs9806942 | NP_899180 | V | M | VM | benign            |
| rs9806945 | NP_689977 | I | T | IT | benign            |
| rs9806961 | NP_899180 | K | N | KN | benign            |
| rs9807056 | NP_077024 | S | R | SR | possibly damaging |
| rs9807555 | XP_496269 | H | R | HR | benign            |
| rs9807556 | NP_003794 | E | V | EV | possibly damaging |
| rs9807633 | XP_496269 | H | P | HP | probably damaging |
| rs9807826 | XP_497611 | C | R | CR | benign            |
| rs9807852 | XP_497611 | W | R | WR | probably damaging |
| rs9808232 | NP_004841 | T | N | TN | benign            |
| rs9808753 | NP_005525 | Q | R | QR | benign            |
| rs9809219 | XP_171032 | R | W | RW | probably damaging |
| rs9809384 | XP_210562 | I | V | IV | benign            |
| rs9809404 | XP_210562 | I | M | IM | benign            |
| rs9810085 | NP_031363 | L | P | LP | benign            |

|           |           |   |   |    |                   |
|-----------|-----------|---|---|----|-------------------|
| rs9810085 | NP_005097 | L | P | LP | benign            |
| rs9810320 | XP_293581 | M | V | MV | benign            |
| rs9810686 | NP_871626 | E | V | EV | possibly damaging |
| rs9810686 | NP_002709 | E | V | EV | possibly damaging |
| rs9811237 | NP_055230 | R | Q | RQ | benign            |
| rs9811715 | NP_060828 | R | H | RH | benign            |
| rs9813017 | NP_037506 | N | S | NS | benign            |
| rs9813235 | NP_001448 | V | M | VM | benign            |
| rs9813489 | NP_660305 | T | I | TI | benign            |
| rs9814373 | NP_653320 | S | G | SG | benign            |
| rs9814557 | NP_002709 | D | G | DG | possibly damaging |
| rs9816575 | XP_496629 | R | G | RG | possibly damaging |
| rs9816587 | XP_496629 | L | V | LV | benign            |
| rs9816693 | NP_056957 | L | F | LF | benign            |
| rs9816941 | NP_054858 | G | R | GR | probably damaging |
| rs9817771 | NP_203528 | S | T | ST | benign            |
| rs9818345 | NP_003232 | Y | H | YH | benign            |
| rs9818735 | NP_078973 | P | R | PR | probably damaging |
| rs9819218 | NP_203528 | S | C | SC | benign            |
| rs9819927 | NP_002653 | P | A | PA | possibly damaging |
| rs9820367 | NP_004357 | S | T | ST | benign            |
| rs9820986 | NP_699184 | P | L | PL | probably damaging |
| rs9822970 | NP_055594 | S | I | SI | benign            |
| rs9823227 | XP_497912 | M | V | MV | benign            |
| rs9823779 | NP_919269 | R | W | RW | probably damaging |
| rs9825578 | NP_008958 | V | I | VI | benign            |
| rs9826032 | NP_002709 | P | L | PL | benign            |
| rs9826032 | NP_871626 | P | L | PL | probably damaging |
| rs9826057 | XP_497937 | S | N | SN | benign            |
| rs9826308 | NP_740750 | H | Q | HQ | benign            |
| rs9826308 | NP_620161 | H | Q | HQ | benign            |
| rs9826325 | NP_055893 | F | L | FL | benign            |
| rs9826737 | NP_996898 | S | L | SL | benign            |
| rs9827333 | NP_002653 | V | I | VI | benign            |
| rs9827576 | NP_919269 | I | V | IV | benign            |
| rs9827689 | NP_056155 | E | D | ED | benign            |
| rs9828502 | XP_210562 | I | V | IV | benign            |
| rs9830253 | XP_067585 | A | T | AT | benign            |
| rs9830589 | NP_115513 | G | R | GR | possibly damaging |
| rs9830664 | NP_005569 | G | S | GS | possibly damaging |
| rs9830734 | XP_291080 | I | V | IV | benign            |
| rs9830744 | NP_071735 | M | I | MI | benign            |
| rs9831516 | XP_114303 | S | L | SL | benign            |
| rs9832794 | XP_376207 | R | C | RC | benign            |
| rs9832850 | NP_001448 | L | R | LR | probably damaging |
| rs9833275 | NP_444255 | V | L | VL | benign            |



|           |           |   |   |    |                   |
|-----------|-----------|---|---|----|-------------------|
| rs9833275 | NP_444257 | V | L | VL | benign            |
| rs9833275 | NP_444253 | V | L | VL | benign            |
| rs9834623 | XP_371617 | M | V | MV | benign            |
| rs9834639 | XP_496641 | P | T | PT | benign            |
| rs9835229 | XP_376232 | L | P | LP | possibly damaging |
| rs9835332 | NP_056039 | R | T | RT | benign            |
| rs9835485 | NP_061121 | T | A | TA | benign            |
| rs9835659 | NP_055951 | V | M | VM | benign            |
| rs9835920 | NP_005920 | N | S | NS | benign            |
| rs9837637 | NP_006216 | G | S | GS | benign            |
| rs9838238 | NP_563615 | I | M | IM | benign            |
| rs9838943 | XP_371617 | H | R | HR | benign            |
| rs9839680 | XP_496652 | L | P | LP | possibly damaging |
| rs9840172 | NP_031363 | N | D | ND | benign            |
| rs9840172 | NP_005097 | N | D | ND | benign            |
| rs9840317 | NP_008883 | R | Q | RQ | benign            |
| rs9840720 | XP_497912 | I | M | IM | benign            |
| rs9840779 | NP_002069 | N | S | NS | benign            |
| rs9840993 | NP_444254 | S | P | SP | benign            |
| rs9840993 | NP_444255 | S | P | SP | benign            |
| rs9840993 | NP_444256 | S | P | SP | benign            |
| rs9840993 | NP_444257 | S | P | SP | benign            |
| rs9840993 | NP_444253 | S | P | SP | benign            |
| rs9841174 | NP_006208 | E | G | EG | benign            |
| rs9841752 | NP_115894 | I | T | IT | benign            |
| rs9843117 | XP_497949 | E | D | ED | benign            |
| rs9843677 | NP_976248 | M | V | MV | benign            |
| rs9843784 | NP_057178 | I | L | IL | benign            |
| rs9843840 | NP_003839 | K | R | KR | benign            |
| rs9844788 | NP_005956 | D | E | DE | benign            |
| rs9844788 | NP_444254 | D | E | DE | benign            |
| rs9844788 | NP_444255 | D | E | DE | benign            |
| rs9844788 | NP_444256 | D | E | DE | benign            |
| rs9844788 | NP_444257 | D | E | DE | benign            |
| rs9844788 | NP_444258 | D | E | DE | benign            |
| rs9844788 | NP_444253 | D | E | DE | benign            |
| rs9845073 | XP_209550 | V | I | VI | benign            |
| rs9847555 | NP_005487 | K | E | KE | benign            |
| rs9847584 | NP_004794 | P | H | PH | probably damaging |
| rs9848466 | XP_293581 | S | N | SN | benign            |
| rs9849888 | NP_689885 | R | H | RH | benign            |
| rs9851180 | NP_113646 | C | Y | CY | probably damaging |
| rs9851219 | NP_071735 | T | A | TA | benign            |
| rs9851222 | NP_149075 | R | T | RT | possibly damaging |
| rs9852079 | NP_003225 | C | W | CW | probably damaging |
| rs9852318 | XP_291062 | A | E | AE | benign            |

|           |           |   |   |    |                   |
|-----------|-----------|---|---|----|-------------------|
| rs9852894 | XP_291085 | T | I | TI | benign            |
| rs9853146 | XP_497911 | M | T | MT | benign            |
| rs9853408 | NP_775928 | A | T | AT | benign            |
| rs9853426 | NP_203528 | A | T | AT | benign            |
| rs9856308 | NP_065941 | T | I | TI | benign            |
| rs9856575 | NP_009115 | I | V | IV | benign            |
| rs9858111 | NP_056275 | I | T | IT | benign            |
| rs9858355 | NP_004177 | P | H | PH | probably damaging |
| rs9858476 | XP_039627 | V | I | VI | benign            |
| rs9859242 | NP_689752 | Q | H | QH | benign            |
| rs9859941 | NP_056391 | H | R | HR | possibly damaging |
| rs9861353 | NP_665698 | R | H | RH | possibly damaging |
| rs9862221 | NP_071377 | E | D | ED | benign            |
| rs9862559 | NP_004104 | G | S | GS | possibly damaging |
| rs9862559 | NP_066360 | G | S | GS | possibly damaging |
| rs9863796 | XP_291062 | V | L | VL | benign            |
| rs9864861 | NP_078789 | E | D | ED | benign            |
| rs9865242 | NP_740750 | E | Q | EQ | benign            |
| rs9865242 | NP_620161 | E | Q | EQ | benign            |
| rs9865715 | NP_004382 | P | S | PS | probably damaging |
| rs9865746 | NP_000452 | D | G | DG | benign            |
| rs9866564 | NP_996898 | R | P | RP | possibly damaging |
| rs9866806 | XP_291062 | P | A | PA | benign            |
| rs9867246 | NP_073573 | S | F | SF | benign            |
| rs9868175 | NP_612144 | K | M | KM | benign            |
| rs9868484 | XP_036988 | H | Y | HY | probably damaging |
| rs9868669 | XP_209569 | S | F | SF | possibly damaging |
| rs9868848 | NP_071735 | L | P | LP | probably damaging |
| rs9868950 | NP_653316 | Q | P | QP | possibly damaging |
| rs9868985 | NP_079456 | S | L | SL | benign            |
| rs9870003 | NP_705615 | P | S | PS | benign            |
| rs9870003 | NP_705616 | P | S | PS | possibly damaging |
| rs9870212 | NP_620309 | A | T | AT | benign            |
| rs9870441 | NP_689912 | E | K | EK | benign            |
| rs9870460 | NP_002832 | Q | R | QR | benign            |
| rs9870470 | XP_376207 | M | V | MV | benign            |
| rs9871062 | XP_171032 | I | T | IT | benign            |
| rs9871671 | NP_653240 | R | C | RC | possibly damaging |
| rs9872477 | XP_171054 | R | K | RK | benign            |
| rs9872512 | NP_116176 | R | H | RH | possibly damaging |
| rs9872691 | XP_210562 | I | V | IV | benign            |
| rs9872760 | NP_699184 | M | I | MI | benign            |
| rs9872799 | NP_071432 | E | A | EA | benign            |
| rs9873604 | NP_061121 | T | I | TI | benign            |
| rs9874077 | NP_073753 | D | G | DG | benign            |
| rs9875356 | NP_078789 | R | H | RH | benign            |

|            |           |   |   |    |                   |
|------------|-----------|---|---|----|-------------------|
| rs9876316  | XP_373004 | H | L | HL | probably damaging |
| rs9876490  | NP_689829 | A | E | AE | benign            |
| rs9876921  | NP_003232 | V | I | VI | benign            |
| rs9878928  | NP_003856 | N | S | NS | benign            |
| rs9880759  | XP_376653 | L | P | LP | benign            |
| rs9880989  | NP_115639 | A | D | AD | benign            |
| rs9883772  | XP_171032 | T | M | TM | benign            |
| rs9883988  | NP_694996 | R | Q | RQ | benign            |
| rs9885412  | NP_078993 | K | R | KR | benign            |
| rs9885480  | NP_777549 | G | S | GS | benign            |
| rs9885672  | NP_055660 | V | A | VA | benign            |
| rs9885914  | NP_060110 | N | S | NS | benign            |
| rs9885986  | XP_069609 | R | H | RH | possibly damaging |
| rs9886043  | NP_000713 | E | D | ED | benign            |
| rs9886834  | XP_114685 | R | K | RK | benign            |
| rs9888937  | NP_115582 | R | K | RK | benign            |
| rs98889363 | XP_375397 | E | D | ED | benign            |
| rs98889851 | NP_004701 | E | K | EK | benign            |
| rs9890011  | NP_115727 | V | F | VF | benign            |
| rs9890362  | NP_004095 | R | H | RH | possibly damaging |
| rs9890466  | NP_001131 | V | M | VM | probably damaging |
| rs9890631  | NP_443160 | I | M | IM | benign            |
| rs9890664  | NP_839947 | R | Q | RQ | benign            |
| rs9890721  | NP_115509 | R | W | RW | probably damaging |
| rs9891146  | NP_858041 | V | I | VI | benign            |
| rs9891176  | NP_060816 | E | Q | EQ | benign            |
| rs9891361  | NP_002265 | V | A | VA | benign            |
| rs9891361  | NP_705694 | V | A | VA | benign            |
| rs9891398  | NP_000258 | D | A | DA | possibly damaging |
| rs9891498  | NP_689811 | S | F | SF | benign            |
| rs9891699  | NP_036525 | P | S | PS | benign            |
| rs9891763  | XP_375387 | A | T | AT | benign            |
| rs9892148  | NP_783165 | L | M | LM | benign            |
| rs9892256  | NP_001363 | R | Q | RQ | possibly damaging |
| rs9892290  | NP_001363 | M | V | MV | benign            |
| rs9892491  | NP_003546 | Q | H | QH | benign            |
| rs9892705  | NP_116035 | A | E | AE | possibly damaging |
| rs9892938  | NP_775818 | G | S | GS | benign            |
| rs9893211  | NP_006604 | D | E | DE | possibly damaging |
| rs9893451  | NP_653282 | R | C | RC | possibly damaging |
| rs9893710  | XP_496238 | K | E | KE | benign            |
| rs9893754  | NP_004749 | N | T | NT | benign            |
| rs9893787  | NP_002269 | R | C | RC | benign            |
| rs9894254  | NP_000190 | V | I | VI | benign            |
| rs9894995  | XP_290799 | D | E | DE | benign            |
| rs9895012  | NP_005164 | R | C | RC | benign            |

|           |           |   |   |    |                   |
|-----------|-----------|---|---|----|-------------------|
| rs9895012 | NP_777613 | R | C | RC | benign            |
| rs9895012 | NP_777614 | R | C | RC | benign            |
| rs9895012 | NP_777616 | R | C | RC | benign            |
| rs9895012 | NP_777617 | R | C | RC | benign            |
| rs9895012 | NP_777618 | R | C | RC | benign            |
| rs9895012 | NP_777615 | R | C | RC | benign            |
| rs9895097 | NP_113686 | L | F | LF | benign            |
| rs9895154 | NP_803190 | R | H | RH | benign            |
| rs9895373 | NP_009198 | S | F | SF | benign            |
| rs9895749 | NP_113644 | E | K | EK | benign            |
| rs9895916 | NP_001132 | R | H | RH | benign            |
| rs9895963 | NP_060597 | S | F | SF | possibly damaging |
| rs9896695 | NP_981959 | C | S | CS | probably damaging |
| rs9896695 | NP_981960 | C | S | CS | probably damaging |
| rs9896695 | NP_056177 | C | S | CS | probably damaging |
| rs9896695 | NP_981958 | C | S | CS | probably damaging |
| rs9896965 | NP_003962 | N | S | NS | benign            |
| rs9896991 | NP_115763 | R | W | RW | possibly damaging |
| rs9897046 | NP_114165 | S | G | SG | benign            |
| rs9897165 | NP_060456 | R | H | RH | benign            |
| rs9897693 | NP_777360 | P | L | PL | possibly damaging |
| rs9897693 | NP_002807 | P | L | PL | possibly damaging |
| rs9898003 | NP_061142 | M | V | MV | possibly damaging |
| rs9898003 | NP_758424 | M | V | MV | possibly damaging |
| rs9898164 | NP_853517 | R | W | RW | probably damaging |
| rs9898682 | NP_004518 | S | L | SL | benign            |
| rs9898682 | NP_054705 | S | L | SL | possibly damaging |
| rs9898983 | NP_689483 | R | L | RL | possibly damaging |
| rs9899000 | XP_496197 | Y | S | YS | benign            |
| rs9899032 | NP_004701 | L | Q | LQ | possibly damaging |
| rs9899862 | NP_116035 | D | E | DE | benign            |
| rs9901177 | XP_496241 | H | R | HR | benign            |
| rs9901177 | NP_004685 | H | R | HR | benign            |
| rs9901356 | NP_002542 | L | V | LV | benign            |
| rs9901673 | NP_001242 | K | Q | KQ | benign            |
| rs9901675 | NP_001242 | A | T | AT | benign            |
| rs9901850 | NP_006364 | P | A | PA | benign            |
| rs9902332 | NP_848613 | G | W | GW | possibly damaging |
| rs9902398 | NP_443160 | C | Y | CY | probably damaging |
| rs9902726 | NP_060411 | G | S | GS | benign            |
| rs9903215 | NP_620148 | A | T | AT | probably damaging |
| rs9903564 | NP_006486 | G | R | GR | possibly damaging |
| rs9903671 | XP_497524 | E | Q | EQ | benign            |
| rs9903685 | NP_002270 | P | A | PA | benign            |
| rs9903686 | NP_002270 | L | V | LV | benign            |
| rs9904065 | NP_443160 | Q | R | QR | benign            |

|           |           |   |   |    |                   |
|-----------|-----------|---|---|----|-------------------|
| rs9904102 | NP_003762 | R | C | RC | probably damaging |
| rs9904366 | NP_954712 | A | T | AT | benign            |
| rs9905086 | XP_497524 | S | R | SR | benign            |
| rs9905106 | NP_203693 | R | Q | RQ | benign            |
| rs9905402 | NP_000171 | W | R | WR | benign            |
| rs9905497 | NP_060427 | V | I | VI | benign            |
| rs9905604 | NP_004749 | W | R | WR | possibly damaging |
| rs9905684 | XP_497524 | I | V | IV | benign            |
| rs9905742 | NP_055335 | M | L | ML | benign            |
| rs9905749 | NP_055048 | N | D | ND | possibly damaging |
| rs9905900 | NP_000142 | Q | H | QH | possibly damaging |
| rs9906179 | XP_497524 | I | V | IV | benign            |
| rs9906421 | NP_060247 | S | G | SG | benign            |
| rs9906590 | NP_006032 | E | K | EK | benign            |
| rs9907144 | NP_114171 | C | R | CR | possibly damaging |
| rs9907167 | NP_127499 | H | Y | HY | benign            |
| rs9907167 | NP_127500 | H | Y | HY | benign            |
| rs9907167 | NP_055737 | H | Y | HY | benign            |
| rs9907167 | NP_127497 | H | Y | HY | benign            |
| rs9907259 | XP_496207 | L | F | LF | benign            |
| rs9907420 | XP_290743 | L | S | LS | benign            |
| rs9907627 | NP_000258 | E | K | EK | benign            |
| rs9907701 | NP_443160 | N | D | ND | benign            |
| rs9908032 | NP_690868 | R | S | RS | possibly damaging |
| rs9908304 | NP_872303 | M | T | MT | benign            |
| rs9908304 | XP_496218 | T | M | TM | benign            |
| rs9908389 | XP_496218 | M | T | MT | benign            |
| rs9908414 | XP_290737 | I | T | IT | benign            |
| rs9908743 | XP_375387 | P | S | PS | possibly damaging |
| rs9909216 | NP_525021 | P | S | PS | benign            |
| rs9909321 | NP_113618 | A | T | AT | benign            |
| rs9909732 | NP_004609 | D | N | DN | benign            |
| rs9909776 | NP_072166 | Y | H | YH | benign            |
| rs9910051 | NP_079133 | T | S | TS | benign            |
| rs9910204 | NP_003761 | G | C | GC | probably damaging |
| rs9910506 | NP_612372 | M | I | MI | possibly damaging |
| rs9910858 | NP_002392 | A | G | AG | benign            |
| rs9910858 | NP_976226 | A | G | AG | benign            |
| rs9911083 | NP_060512 | V | A | VA | benign            |
| rs9911226 | XP_497524 | P | T | PT | possibly damaging |
| rs9911231 | NP_653278 | L | P | LP | possibly damaging |
| rs9911231 | NP_945193 | L | P | LP | possibly damaging |
| rs9911283 | NP_004609 | N | D | ND | possibly damaging |
| rs9911502 | NP_997229 | N | K | NK | benign            |
| rs9911632 | NP_004515 | R | W | RW | probably damaging |
| rs9911649 | NP_658988 | G | E | GE | probably damaging |

|           |           |   |   |    |                   |
|-----------|-----------|---|---|----|-------------------|
| rs9912090 | XP_497524 | N | S | NS | benign            |
| rs9912267 | XP_372668 | T | I | TI | possibly damaging |
| rs9912315 | NP_001298 | V | F | VF | possibly damaging |
| rs9912492 | NP_115948 | G | R | GR | benign            |
| rs9912805 | NP_060874 | A | G | AG | benign            |
| rs9913145 | NP_004749 | Q | R | QR | benign            |
| rs9913158 | NP_005164 | D | N | DN | benign            |
| rs9913158 | NP_777613 | D | N | DN | benign            |
| rs9913158 | NP_777614 | D | N | DN | benign            |
| rs9913158 | NP_777616 | D | N | DN | benign            |
| rs9913158 | NP_777617 | D | N | DN | benign            |
| rs9913158 | NP_777618 | D | N | DN | benign            |
| rs9913158 | NP_777615 | D | N | DN | benign            |
| rs9913430 | NP_073738 | S | T | ST | benign            |
| rs9913494 | NP_001363 | R | C | RC | probably damaging |
| rs9913494 | NP_004653 | R | C | RC | probably damaging |
| rs9913621 | NP_004646 | V | M | VM | benign            |
| rs9913763 | XP_375408 | Q | H | QH | benign            |
| rs9913923 | NP_443160 | G | S | GS | benign            |
| rs9914050 | XP_371019 | R | P | RP | benign            |
| rs9915020 | XP_496237 | P | H | PH | probably damaging |
| rs9916194 | XP_496217 | G | E | GE | possibly damaging |
| rs9916254 | NP_759018 | G | S | GS | benign            |
| rs9916254 | NP_525022 | G | S | GS | benign            |
| rs9916475 | NP_003761 | S | C | SC | benign            |
| rs9916482 | NP_001363 | T | A | TA | benign            |
| rs9916484 | NP_003761 | T | A | TA | benign            |
| rs9916524 | NP_940903 | W | R | WR | possibly damaging |
| rs9916628 | NP_002539 | F | Y | FY | benign            |
| rs9916724 | NP_003761 | N | S | NS | benign            |
| rs9916987 | NP_000757 | F | Y | FY | benign            |
| rs9917722 | NP_001032 | T | S | TS | benign            |
| rs9917821 | NP_065080 | N | H | NH | benign            |
| rs9919155 | XP_039721 | L | P | LP | probably damaging |
| rs9921199 | XP_496122 | H | Q | HQ | possibly damaging |
| rs9921748 | NP_877417 | M | V | MV | possibly damaging |
| rs9921812 | NP_877417 | D | G | DG | benign            |
| rs9921827 | NP_877417 | Q | R | QR | benign            |
| rs9923813 | NP_872299 | S | T | ST | benign            |
| rs9924150 | NP_872423 | D | N | DN | possibly damaging |
| rs9924150 | XP_058743 | N | D | ND | possibly damaging |
| rs9924241 | NP_066921 | A | V | AV | benign            |
| rs9924371 | NP_877417 | W | R | WR | benign            |
| rs9925969 | NP_000287 | F | L | FL | possibly damaging |
| rs9926580 | NP_777584 | A | T | AT | benign            |
| rs9926625 | XP_372607 | V | I | VI | benign            |

|           |           |   |   |    |                   |
|-----------|-----------|---|---|----|-------------------|
| rs9927389 | NP_005814 | A | V | AV | benign            |
| rs9928053 | NP_060358 | R | Q | RQ | benign            |
| rs9928233 | NP_060009 | M | L | ML | benign            |
| rs9928302 | NP_659461 | P | H | PH | probably damaging |
| rs9928967 | NP_078811 | A | T | AT | benign            |
| rs9930567 | NP_150254 | A | T | AT | benign            |
| rs9930567 | NP_000968 | A | T | AT | benign            |
| rs9930623 | NP_689550 | K | E | KE | benign            |
| rs9930780 | XP_497494 | R | C | RC | possibly damaging |
| rs9930821 | XP_056254 | R | L | RL | benign            |
| rs9930984 | NP_620685 | L | I | LI | benign            |
| rs9930984 | NP_955387 | L | I | LI | benign            |
| rs9931725 | XP_496122 | T | A | TA | benign            |
| rs9931747 | XP_496122 | K | R | KR | benign            |
| rs9932277 | XP_064152 | G | R | GR | benign            |
| rs9932495 | XP_370946 | V | I | VI | benign            |
| rs9932770 | NP_055113 | A | T | AT | benign            |
| rs9932912 | NP_065769 | A | T | AT | benign            |
| rs9933642 | NP_057319 | N | K | NK | possibly damaging |
| rs9934067 | NP_065706 | V | M | VM | benign            |
| rs9934100 | NP_078982 | Y | N | YN | probably damaging |
| rs9934227 | NP_950247 | N | S | NS | benign            |
| rs9934227 | NP_955535 | N | S | NS | benign            |
| rs9934272 | NP_877417 | K | N | KN | benign            |
| rs9934277 | NP_872369 | P | L | PL | probably damaging |
| rs9934667 | NP_060589 | V | M | VM | benign            |
| rs9934734 | NP_775322 | T | P | TP | benign            |
| rs9934849 | NP_000284 | E | V | EV | possibly damaging |
| rs9934856 | NP_877417 | L | V | LV | benign            |
| rs9934891 | NP_940893 | E | K | EK | benign            |
| rs9935059 | NP_037434 | H | R | HR | benign            |
| rs9935113 | NP_877417 | G | C | GC | probably damaging |
| rs9936675 | NP_597707 | A | T | AT | benign            |
| rs9936785 | NP_000287 | H | R | HR | probably damaging |
| rs9937169 | NP_877417 | N | S | NS | benign            |
| rs9937453 | XP_370944 | N | S | NS | benign            |
| rs9938333 | NP_877417 | I | V | IV | benign            |
| rs9938543 | NP_115582 | P | L | PL | benign            |
| rs9938550 | NP_079469 | T | A | TA | benign            |
| rs9939768 | NP_848611 | Q | E | QE | benign            |
| rs9941182 | XP_058743 | D | E | DE | possibly damaging |
| rs9941182 | NP_872423 | E | D | ED | possibly damaging |
| rs9941564 | XP_496581 | A | E | AE | benign            |
| rs9941690 | XP_496581 | K | R | KR | benign            |
| rs9941691 | XP_496581 | S | G | SG | benign            |
| rs9941840 | NP_003480 | V | I | VI | benign            |

|           |           |   |   |    |                   |
|-----------|-----------|---|---|----|-------------------|
| rs9942557 | NP_060804 | D | G | DG | benign            |
| rs9943012 | XP_066695 | E | G | EG | possibly damaging |
| rs9943208 | NP_003456 | G | R | GR | probably damaging |
| rs9943351 | NP_898881 | I | T | IT | benign            |
| rs9943856 | NP_060693 | P | L | PL | benign            |
| rs9945510 | XP_497576 | I | T | IT | benign            |
| rs9946214 | NP_002965 | I | F | IF | possibly damaging |
| rs9948144 | XP_371116 | T | P | TP | benign            |
| rs9948825 | NP_056949 | W | R | WR | probably damaging |
| rs9950267 | NP_005550 | L | S | LS | possibly damaging |
| rs9950585 | NP_919431 | S | T | ST | benign            |
| rs9950781 | XP_371116 | K | R | KR | benign            |
| rs9951523 | NP_005206 | L | F | LF | benign            |
| rs9952370 | NP_000218 | T | A | TA | benign            |
| rs9952370 | NP_937762 | T | A | TA | benign            |
| rs9959396 | NP_005916 | V | M | VM | benign            |
| rs9960464 | NP_009094 | Q | R | QR | benign            |
| rs9961682 | XP_113962 | I | V | IV | benign            |
| rs9963243 | NP_006024 | G | S | GS | benign            |
| rs9963473 | NP_665699 | H | L | HL | probably damaging |
| rs9963788 | NP_079057 | A | P | AP | benign            |
| rs9964535 | XP_371114 | R | W | RW | possibly damaging |
| rs9965081 | NP_945346 | E | V | EV | possibly damaging |
| rs9966265 | NP_004154 | A | T | AT | benign            |
| rs9966357 | NP_036439 | A | T | AT | benign            |
| rs9967382 | NP_005015 | P | S | PS | benign            |
| rs9967601 | NP_005572 | R | H | RH | possibly damaging |
| rs9969708 | NP_219480 | V | F | VF | benign            |
| rs9970097 | NP_899228 | S | A | SA | benign            |
| rs9970408 | NP_065168 | E | K | EK | benign            |
| rs9972231 | NP_002217 | D | N | DN | benign            |
| rs9972231 | NP_660142 | D | N | DN | benign            |
| rs9972332 | NP_004564 | P | L | PL | benign            |
| rs9972733 | NP_848547 | E | D | ED | benign            |
| rs9972951 | NP_055775 | R | H | RH | benign            |
| rs9973235 | NP_005808 | A | V | AV | benign            |
| rs9973304 | NP_849152 | R | H | RH | possibly damaging |
| rs9974333 | NP_031367 | V | A | VA | benign            |
| rs9974927 | NP_003298 | D | E | DE | benign            |
| rs9975169 | NP_003480 | N | S | NS | benign            |
| rs9975588 | NP_003897 | S | L | SL | benign            |
| rs9976017 | NP_004562 | R | H | RH | possibly damaging |
| rs9976382 | NP_067042 | S | R | SR | possibly damaging |
| rs9976610 | NP_004919 | R | H | RH | benign            |
| rs9977204 | NP_780294 | D | N | DN | benign            |
| rs9978351 | NP_003298 | R | Q | RQ | benign            |



|            |           |   |   |    |                   |
|------------|-----------|---|---|----|-------------------|
| rs9980129  | NP_941963 | R | C | RC | possibly damaging |
| rs9980589  | NP_003886 | V | A | VA | benign            |
| rs9981024  | NP_950251 | T | A | TA | benign            |
| rs9981359  | NP_387505 | R | T | RT | possibly damaging |
| rs9981448  | NP_006022 | T | A | TA | benign            |
| rs9984077  | NP_780294 | V | I | VI | benign            |
| rs9986531  | XP_371835 | E | K | EK | benign            |
| rs9986532  | XP_371835 | D | N | DN | benign            |
| rs9986555  | NP_000726 | L | I | LI | benign            |
| rs9986564  | NP_006572 | W | G | WG | probably damaging |
| rs9986596  | NP_061983 | S | F | SF | possibly damaging |
| rs9988205  | XP_372191 | R | H | RH | benign            |
| rs9988418  | NP_689418 | R | K | RK | benign            |
| rs9988420  | NP_653185 | T | A | TA | benign            |
| rs9988723  | NP_065850 | A | T | AT | benign            |
| rs9988907  | NP_055434 | M | T | MT | benign            |
| rs9989177  | NP_060609 | D | G | DG | possibly damaging |
| rs9989327  | XP_375150 | T | A | TA | benign            |
| rs9989776  | NP_055455 | T | I | TI | benign            |
| rs9990817  | XP_374902 | T | I | TI | benign            |
| rs9991339  | XP_496727 | R | W | RW | possibly damaging |
| rs9991501  | NP_057329 | R | Q | RQ | benign            |
| rs9991535  | NP_003643 | T | M | TM | probably damaging |
| rs9991664  | NP_001954 | H | Y | HY | benign            |
| rs9993896  | XP_373033 | S | C | SC | possibly damaging |
| rs9994289  | XP_497976 | C | R | CR | probably damaging |
| rs9999097  | NP_689988 | L | M | LM | benign            |
| rs10000692 | NP_079149 | K | E | KE | benign            |
| rs10001580 | NP_060760 | E | D | ED | benign            |
| rs10002700 | NP_689613 | E | G | EG | possibly damaging |
| rs10003238 | NP_065186 | N | S | NS | benign            |
| rs10003369 | NP_783864 | S | Y | SY | benign            |
| rs10003632 | XP_209604 | T | N | TN | benign            |
| rs10004516 | NP_001968 | R | Q | RQ | possibly damaging |
| rs10005739 | NP_006008 | T | P | TP | benign            |
| rs10007569 | NP_689505 | R | Q | RQ | benign            |
| rs10007789 | XP_373038 | E | K | EK | benign            |
| rs10008444 | NP_783318 | Q | H | QH | benign            |
| rs10009228 | NP_060051 | S | N | SN | benign            |
| rs10010188 | NP_060697 | T | A | TA | benign            |
| rs10010374 | XP_052597 | E | D | ED | benign            |
| rs10010434 | NP_003695 | R | Q | RQ | benign            |
| rs10011440 | NP_000244 | S | T | ST | benign            |
| rs10011549 | NP_861524 | G | S | GS | benign            |
| rs10013280 | NP_114162 | T | A | TA | benign            |
| rs10014170 | NP_060647 | M | V | MV | benign            |

|            |              |   |   |    |                   |
|------------|--------------|---|---|----|-------------------|
| rs10015804 | NP_689895    | L | I | LI | benign            |
| rs10016614 | XP_373033    | P | L | PL | possibly damaging |
| rs10016672 | XP_373033    | V | I | VI | benign            |
| rs10016702 | XP_114418    | S | P | SP | benign            |
| rs10017270 | XP_371706    | T | A | TA | benign            |
| rs10018786 | NP_861524    | M | L | ML | benign            |
| rs10019009 | NP_004398    | S | C | SC | possibly damaging |
| rs10019693 | XP_497963    | Y | C | YC | probably damaging |
| rs10020863 | XP_497978    | A | S | AS | benign            |
| rs10021152 | XP_497978    | D | H | DH | possibly damaging |
| rs10022054 | XP_497963    | Q | R | QR | benign            |
| rs10022360 | NP_997718    | Y | C | YC | probably damaging |
| rs10022428 | XP_067994    | M | T | MT | benign            |
| rs10024518 | NP_060051    | R | Q | RQ | benign            |
| rs10026797 | XP_374902    | V | L | VL | benign            |
| rs10027479 | NP_689831    | N | H | NH | benign            |
| rs10027955 | NP_005029    | Y | F | YF | possibly damaging |
| rs10028087 | NP_938167    | A | V | AV | benign            |
| rs10028124 | NP_653244    | C | S | CS | benign            |
| rs10029536 | XP_037817    | N | K | NK | benign            |
| rs10030708 | NP_997290    | A | T | AT | benign            |
| rs10033029 | NP_542415    | F | L | FL | benign            |
| rs10033029 | NP_006255    | F | L | FL | benign            |
| rs10033029 | NP_542416    | F | L | FL | possibly damaging |
| rs10033029 | NP_542414    | F | L | FL | possibly damaging |
| rs10034345 | NP_001501    | V | I | VI | benign            |
| rs10034957 | NP_036356    | I | M | IM | benign            |
| rs10036567 | NP_055588    | F | L | FL | benign            |
| rs10037225 | NP_443131    | G | A | GA | benign            |
| rs10037485 | NP_001001343 | V | I | VI | benign            |
| rs10037618 | NP_942568    | V | I | VI | benign            |
| rs10037618 | NP_055858    | V | I | VI | benign            |
| rs10037809 | NP_001704    | N | H | NH | possibly damaging |
| rs10039229 | NP_057424    | V | E | VE | possibly damaging |
| rs10039374 | NP_065122    | D | E | DE | benign            |
| rs10039644 | NP_005537    | V | G | VG | probably damaging |
| rs10040427 | NP_003051    | L | F | LF | benign            |
| rs10040926 | NP_057664    | P | R | PR | probably damaging |
| rs10041504 | NP_057305    | V | G | VG | possibly damaging |
| rs10042271 | NP_689761    | R | G | RG | possibly damaging |
| rs10042608 | NP_861441    | A | V | AV | benign            |
| rs10043775 | NP_110420    | S | P | SP | benign            |
| rs10043775 | NP_995308    | S | P | SP | benign            |
| rs10043986 | NP_705838    | P | L | PL | probably damaging |
| rs10044879 | NP_001438    | G | S | GS | benign            |
| rs10045130 | NP_002178    | G | R | GR | benign            |

|            |           |   |   |    |                   |
|------------|-----------|---|---|----|-------------------|
| rs10045243 | NP_775760 | L | I | LI | benign            |
| rs10047195 | NP_149033 | A | G | AG | benign            |
| rs10047381 | NP_068815 | Q | P | QP | probably damaging |
| rs10048853 | NP_940998 | R | H | RH | possibly damaging |
| rs10048853 | NP_061325 | R | H | RH | possibly damaging |
| rs10048964 | XP_057296 | S | C | SC | probably damaging |
| rs10050860 | NP_057526 | N | D | ND | benign            |
| rs10051434 | NP_061755 | H | Q | HQ | benign            |
| rs10051838 | XP_371778 | R | Q | RQ | benign            |
| rs10054043 | NP_597713 | T | A | TA | benign            |
| rs10054110 | NP_775760 | N | K | NK | benign            |
| rs10055742 | NP_872438 | T | M | TM | benign            |
| rs10055840 | NP_775759 | T | R | TR | benign            |
| rs10056252 | XP_209695 | Y | C | YC | probably damaging |
| rs10056676 | NP_055588 | R | C | RC | benign            |
| rs10057110 | NP_000431 | N | S | NS | benign            |
| rs10057190 | NP_000349 | R | G | RG | possibly damaging |
| rs10059653 | NP_291027 | V | A | VA | benign            |
| rs10059653 | NP_963921 | V | A | VA | benign            |
| rs10062501 | NP_598377 | E | G | EG | benign            |
| rs10064631 | NP_076915 | L | V | LV | benign            |
| rs10064631 | NP_002445 | L | V | LV | benign            |
| rs10065269 | XP_371731 | F | L | FL | benign            |
| rs10065646 | XP_029101 | Q | P | QP | benign            |
| rs10066063 | NP_835260 | R | Q | RQ | benign            |
| rs10066808 | NP_066550 | H | Q | HQ | probably damaging |
| rs10066882 | NP_078853 | D | Y | DY | probably damaging |
| rs10067096 | NP_150377 | S | A | SA | benign            |
| rs10067182 | NP_114040 | R | K | RK | benign            |
| rs10067182 | NP_061733 | R | K | RK | benign            |
| rs10067611 | NP_775760 | M | V | MV | benign            |
| rs10068403 | XP_373440 | G | E | GE | benign            |
| rs10068740 | XP_371770 | S | R | SR | benign            |
| rs10069087 | XP_498030 | N | S | NS | benign            |
| rs10069396 | NP_114400 | Y | C | YC | probably damaging |
| rs10069396 | NP_061739 | Y | C | YC | probably damaging |
| rs10071369 | NP_114067 | S | Y | SY | benign            |
| rs10071369 | NP_061725 | S | Y | SY | benign            |
| rs10071816 | NP_073739 | N | S | NS | benign            |
| rs10071845 | NP_079270 | R | C | RC | possibly damaging |
| rs10072243 | NP_003053 | P | A | PA | probably damaging |
| rs10073222 | XP_376403 | W | R | WR | benign            |
| rs10073333 | NP_775759 | P | A | PA | possibly damaging |
| rs10075121 | XP_379323 | I | T | IT | benign            |
| rs10075302 | NP_114153 | G | C | GC | benign            |
| rs10076554 | NP_061762 | L | F | LF | possibly damaging |

|            |           |   |   |    |                   |
|------------|-----------|---|---|----|-------------------|
| rs10076911 | NP_075561 | F | C | FC | benign            |
| rs10077543 | NP_078853 | T | A | TA | benign            |
| rs10078391 | NP_001360 | Q | R | QR | benign            |
| rs10078623 | XP_374142 | V | A | VA | benign            |
| rs10078759 | NP_776161 | L | F | LF | benign            |
| rs10078777 | NP_775941 | R | G | RG | possibly damaging |
| rs10079250 | NP_005202 | H | R | HR | benign            |
| rs10080478 | XP_496798 | G | R | GR | possibly damaging |
| rs10080628 | NP_057314 | P | S | PS | benign            |
| rs10081139 | NP_002517 | M | T | MT | possibly damaging |
| rs10081141 | NP_112225 | C | R | CR | probably damaging |
| rs10081594 | NP_055932 | L | V | LV | benign            |
| rs10082357 | NP_940898 | G | R | GR | probably damaging |
| rs10082391 | NP_002408 | D | G | DG | possibly damaging |
| rs10082533 | NP_002408 | S | N | SN | benign            |
| rs10082778 | NP_055318 | Q | L | QL | benign            |
| rs10083536 | NP_009041 | T | M | TM | benign            |
| rs10083789 | NP_065769 | R | L | RL | probably damaging |
| rs10084168 | XP_371488 | S | C | SC | benign            |
| rs10086990 | NP_003961 | T | P | TP | possibly damaging |
| rs10087163 | NP_000309 | R | C | RC | probably damaging |
| rs10088145 | NP_006858 | T | A | TA | benign            |
| rs10089600 | NP_062825 | P | A | PA | possibly damaging |
| rs10090550 | NP_904357 | R | H | RH | benign            |
| rs10090550 | NP_904356 | R | H | RH | benign            |
| rs10091081 | NP_002681 | G | A | GA | benign            |
| rs10091783 | XP_498284 | T | P | TP | benign            |
| rs10093068 | NP_076418 | E | Q | EQ | benign            |
| rs10093583 | NP_065208 | M | V | MV | benign            |
| rs10093583 | NP_065209 | M | V | MV | benign            |
| rs10093583 | NP_000028 | M | V | MV | benign            |
| rs10093583 | NP_065210 | M | V | MV | benign            |
| rs10093794 | NP_055052 | V | F | VF | benign            |
| rs10093885 | NP_803875 | T | A | TA | benign            |
| rs10094744 | NP_689778 | G | R | GR | benign            |
| rs10094973 | NP_996792 | A | T | AT | benign            |
| rs10096734 | NP_443195 | E | D | ED | benign            |
| rs10098508 | NP_874365 | E | V | EV | benign            |
| rs10098508 | NP_056171 | E | V | EV | benign            |
| rs10100659 | NP_079107 | I | T | IT | benign            |
| rs10101357 | XP_496991 | H | P | HP | probably damaging |
| rs10103355 | NP_004306 | A | V | AV | benign            |
| rs10103355 | NP_808592 | A | V | AV | benign            |
| rs10105064 | NP_003961 | A | V | AV | benign            |
| rs10106469 | XP_047083 | V | L | VL | benign            |
| rs10107016 | NP_006274 | E | G | EG | possibly damaging |

|            |           |   |   |    |                   |
|------------|-----------|---|---|----|-------------------|
| rs10107332 | XP_291266 | G | C | GC | probably damaging |
| rs10109493 | NP_079107 | T | A | TA | benign            |
| rs10111612 | NP_006274 | S | F | SF | possibly damaging |
| rs10113875 | NP_002162 | G | R | GR | benign            |
| rs10113876 | NP_002162 | S | T | ST | benign            |
| rs10114387 | XP_497020 | A | T | AT | benign            |
| rs10115703 | NP_005445 | R | W | RW | benign            |
| rs10116806 | NP_002820 | D | N | DN | benign            |
| rs10118943 | NP_036548 | A | T | AT | benign            |
| rs10119273 | NP_004869 | A | V | AV | benign            |
| rs10119590 | XP_208403 | P | L | PL | possibly damaging |
| rs10119768 | NP_001726 | W | G | WG | probably damaging |
| rs10119874 | XP_376895 | G | E | GE | possibly damaging |
| rs10119919 | XP_497051 | I | F | IF | possibly damaging |
| rs10120210 | NP_001384 | Q | P | QP | benign            |
| rs10121198 | XP_497012 | V | M | VM | probably damaging |
| rs10121870 | XP_376888 | R | L | RL | possibly damaging |
| rs10122075 | XP_294540 | Q | K | QK | benign            |
| rs10123355 | NP_000026 | R | S | RS | probably damaging |
| rs10125097 | XP_498307 | H | Q | HQ | possibly damaging |
| rs10126146 | XP_291339 | W | R | WR | probably damaging |
| rs10126452 | XP_293387 | H | Q | HQ | benign            |
| rs10127175 | NP_001560 | C | S | CS | probably damaging |
| rs10127857 | NP_000560 | E | D | ED | benign            |
| rs10127939 | NP_000560 | L | R | LR | possibly damaging |
| rs10128723 | NP_150594 | L | R | LR | benign            |
| rs10128723 | NP_006449 | L | R | LR | benign            |
| rs10129889 | NP_001367 | H | Q | HQ | benign            |
| rs10130647 | NP_689805 | I | V | IV | benign            |
| rs10130991 | XP_495998 | A | S | AS | benign            |
| rs10131298 | XP_040910 | L | H | LH | probably damaging |
| rs10131326 | XP_372505 | N | D | ND | benign            |
| rs10132325 | XP_372532 | T | M | TM | benign            |
| rs10132601 | NP_004554 | D | N | DN | possibly damaging |
| rs10134365 | NP_473365 | D | H | DH | possibly damaging |
| rs10134472 | XP_372505 | C | R | CR | benign            |
| rs10134537 | NP_612461 | T | I | TI | possibly damaging |
| rs10134590 | NP_031387 | R | Q | RQ | benign            |
| rs10135525 | NP_055175 | A | T | AT | benign            |
| rs10137161 | NP_002367 | F | S | FS | benign            |
| rs10137359 | NP_060699 | G | R | GR | benign            |
| rs10137921 | NP_005947 | T | M | TM | probably damaging |
| rs10138395 | NP_060413 | G | V | GV | probably damaging |
| rs10138997 | XP_048128 | S | F | SF | benign            |
| rs10139010 | XP_370738 | K | E | KE | benign            |
| rs10139756 | XP_063310 | S | F | SF | probably damaging |

|            |           |   |   |    |                   |
|------------|-----------|---|---|----|-------------------|
| rs10139784 | NP_060888 | R | Q | RQ | benign            |
| rs10140245 | NP_060699 | E | D | ED | benign            |
| rs10140652 | XP_063315 | S | Y | SY | benign            |
| rs10140908 | XP_372505 | S | T | ST | benign            |
| rs10141025 | XP_372505 | R | H | RH | benign            |
| rs10141053 | XP_290629 | M | V | MV | benign            |
| rs10141251 | XP_290609 | K | N | KN | benign            |
| rs10142502 | NP_079228 | R | C | RC | benign            |
| rs10142728 | NP_689990 | M | I | MI | benign            |
| rs10142739 | XP_375081 | A | T | AT | benign            |
| rs10142844 | XP_029353 | G | R | GR | probably damaging |
| rs10145307 | XP_375075 | N | I | NI | possibly damaging |
| rs10145388 | XP_375075 | D | G | DG | possibly damaging |
| rs10146482 | NP_149107 | H | R | HR | benign            |
| rs10147876 | XP_027236 | G | E | GE | possibly damaging |
| rs10148371 | NP_002297 | R | K | RK | benign            |
| rs10148770 | XP_497405 | E | K | EK | benign            |
| rs10148785 | XP_290629 | P | L | PL | probably damaging |
| rs10149146 | XP_375105 | I | V | IV | benign            |
| rs10149626 | XP_033371 | V | L | VL | benign            |
| rs10149705 | NP_079010 | P | L | PL | probably damaging |
| rs10150925 | NP_071420 | V | M | VM | benign            |
| rs10151259 | NP_065099 | A | S | AS | benign            |
| rs10151658 | NP_878918 | L | M | LM | benign            |
| rs10152474 | NP_001141 | V | M | VM | benign            |
| rs10152546 | NP_443081 | K | I | KI | probably damaging |
| rs10152640 | NP_689810 | R | C | RC | possibly damaging |
| rs10152994 | XP_372589 | P | T | PT | possibly damaging |
| rs10153004 | XP_372589 | T | I | TI | benign            |
| rs10153474 | NP_892018 | A | T | AT | benign            |
| rs10153584 | NP_065830 | P | R | PR | probably damaging |
| rs10154518 | XP_496486 | A | V | AV | benign            |
| rs10154736 | XP_496486 | R | K | RK | benign            |
| rs10156070 | NP_000587 | Q | P | QP | benign            |
| rs10156191 | NP_001082 | T | M | TM | benign            |
| rs10156474 | XP_373308 | K | E | KE | possibly damaging |
| rs10157422 | NP_055954 | A | T | AT | benign            |
| rs10158072 | XP_497720 | L | S | LS | benign            |
| rs10158114 | XP_497739 | D | N | DN | benign            |
| rs10158256 | NP_009098 | K | R | KR | benign            |
| rs10158395 | NP_005798 | N | S | NS | benign            |
| rs10158841 | XP_040527 | D | E | DE | benign            |
| rs10159690 | NP_004025 | R | H | RH | possibly damaging |
| rs10159690 | NP_001147 | R | H | RH | possibly damaging |
| rs10160013 | NP_068506 | A | V | AV | benign            |
| rs10160013 | NP_003165 | V | A | VA | benign            |

|            |           |   |   |    |                   |
|------------|-----------|---|---|----|-------------------|
| rs10160116 | NP_877432 | P | S | PS | probably damaging |
| rs10160385 | NP_653266 | R | C | RC | probably damaging |
| rs10160951 | NP_002553 | P | R | PR | probably damaging |
| rs10161760 | NP_112567 | A | P | AP | benign            |
| rs10162203 | XP_495947 | N | K | NK | benign            |
| rs10162564 | NP_005921 | K | E | KE | benign            |
| rs10162564 | NP_976230 | K | E | KE | benign            |
| rs10162564 | NP_976231 | K | E | KE | benign            |
| rs10162564 | NP_976229 | K | E | KE | benign            |
| rs10162564 | NP_976232 | K | E | KE | benign            |
| rs10164332 | NP_653285 | S | F | SF | probably damaging |
| rs10164815 | NP_872327 | T | I | TI | benign            |
| rs10165091 | NP_004930 | F | L | FL | possibly damaging |
| rs10166775 | XP_497876 | Q | E | QE | benign            |
| rs10166913 | XP_371488 | T | M | TM | benign            |
| rs10167000 | NP_055963 | V | M | VM | benign            |
| rs10167688 | NP_078808 | P | T | PT | possibly damaging |
| rs10168181 | NP_620482 | A | T | AT | benign            |
| rs10168562 | XP_496608 | P | Q | PQ | possibly damaging |
| rs10169162 | NP_620355 | D | E | DE | benign            |
| rs10171309 | XP_371476 | A | T | AT | benign            |
| rs10172023 | NP_004534 | C | W | CW | probably damaging |
| rs10172220 | NP_919288 | Q | R | QR | benign            |
| rs10175843 | NP_742066 | M | V | MV | benign            |
| rs10175940 | NP_005782 | D | N | DN | benign            |
| rs10175961 | NP_004035 | I | M | IM | benign            |
| rs10177248 | XP_376060 | M | T | MT | benign            |
| rs10177508 | NP_542409 | R | G | RG | possibly damaging |
| rs10177628 | NP_872431 | I | V | IV | benign            |
| rs10177991 | NP_056350 | R | K | RK | benign            |
| rs10178090 | NP_056350 | R | K | RK | benign            |
| rs10178293 | XP_017374 | E | Q | EQ | benign            |
| rs10178458 | NP_112734 | P | L | PL | benign            |
| rs10179772 | NP_006764 | K | R | KR | benign            |
| rs10183169 | XP_496597 | G | R | GR | possibly damaging |
| rs10183641 | NP_064707 | L | W | LW | possibly damaging |
| rs10183668 | NP_004171 | G | R | GR | possibly damaging |
| rs10184131 | NP_061720 | M | T | MT | probably damaging |
| rs10184211 | NP_620711 | C | G | CG | probably damaging |
| rs10184596 | XP_372911 | M | L | ML | benign            |
| rs10185178 | NP_620482 | K | R | KR | benign            |
| rs10185378 | NP_689739 | T | I | TI | possibly damaging |
| rs10186505 | XP_496622 | N | H | NH | benign            |
| rs10187689 | NP_115787 | A | T | AT | benign            |
| rs10187694 | NP_061948 | E | K | EK | possibly damaging |
| rs10189135 | NP_000538 | V | M | VM | benign            |

|            |           |   |   |    |                   |
|------------|-----------|---|---|----|-------------------|
| rs10189135 | NP_783650 | V | M | VM | benign            |
| rs10189135 | NP_783651 | V | M | VM | benign            |
| rs10189135 | NP_783652 | V | M | VM | benign            |
| rs10189135 | NP_783653 | V | M | VM | benign            |
| rs10191506 | XP_065750 | E | K | EK | benign            |
| rs10192036 | NP_057316 | Q | K | QK | benign            |
| rs10192157 | NP_057316 | T | I | TI | benign            |
| rs10195632 | NP_872327 | Y | F | YF | benign            |
| rs10195758 | NP_872327 | E | D | ED | benign            |
| rs10197095 | NP_037473 | S | F | SF | probably damaging |
| rs10197514 | XP_092342 | S | T | ST | benign            |
| rs10198538 | NP_055962 | R | H | RH | benign            |
| rs10198826 | XP_497839 | R | H | RH | benign            |
| rs10198893 | NP_061720 | K | E | KE | benign            |
| rs10199088 | NP_005782 | E | A | EA | possibly damaging |
| rs10200182 | NP_000173 | Q | K | QK | benign            |
| rs10201128 | XP_371487 | G | R | GR | probably damaging |
| rs10201400 | NP_001144 | S | R | SR | possibly damaging |
| rs10201436 | XP_371480 | E | K | EK | benign            |
| rs10201766 | NP_001548 | R | C | RC | probably damaging |
| rs10202624 | NP_061936 | V | I | VI | benign            |
| rs10203042 | NP_689600 | A | V | AV | benign            |
| rs10203154 | NP_689600 | G | C | GC | benign            |
| rs10204137 | NP_057316 | Q | R | QR | benign            |
| rs10204742 | NP_079002 | K | R | KR | benign            |
| rs10205381 | XP_497868 | D | N | DN | benign            |
| rs10205485 | NP_002988 | Q | L | QL | benign            |
| rs10205833 | XP_497833 | L | F | LF | benign            |
| rs10206276 | NP_065970 | S | F | SF | benign            |
| rs10206753 | NP_057316 | L | S | LS | benign            |
| rs10206957 | NP_116129 | G | R | GR | benign            |
| rs10209072 | NP_000201 | V | M | VM | benign            |
| rs10209102 | NP_620482 | I | V | IV | benign            |
| rs10209273 | NP_000808 | R | Q | RQ | benign            |
| rs10210191 | NP_071348 | E | G | EG | benign            |
| rs10212009 | XP_496486 | S | P | SP | benign            |
| rs10212031 | XP_496486 | R | Q | RQ | benign            |
| rs10212057 | XP_496486 | P | L | PL | benign            |
| rs10212067 | XP_496486 | K | E | KE | benign            |
| rs10213286 | NP_002439 | P | S | PS | probably damaging |
| rs10216409 | XP_498284 | S | T | ST | benign            |
| rs10217154 | XP_376895 | N | K | NK | benign            |
| rs10217494 | XP_376895 | M | I | MI | benign            |
| rs10217999 | NP_443189 | R | H | RH | benign            |
| rs10219555 | XP_051091 | A | T | AT | benign            |
| rs10221432 | NP_660330 | G | S | GS | benign            |



|            |           |   |   |    |                   |
|------------|-----------|---|---|----|-------------------|
| rs10221459 | NP_060322 | E | G | EG | possibly damaging |
| rs10221530 | XP_372712 | A | T | AT | benign            |
| rs10221698 | XP_092342 | V | A | VA | benign            |
| rs10221907 | NP_078900 | I | M | IM | benign            |
| rs10222114 | NP_006022 | G | S | GS | benign            |
| rs10223538 | NP_995586 | T | I | TI | benign            |
| rs10223538 | NP_786887 | T | I | TI | benign            |
| rs10223858 | XP_371843 | L | P | LP | possibly damaging |
| rs10224753 | XP_376720 | L | V | LV | benign            |
| rs10224831 | NP_078774 | I | V | IV | benign            |
| rs10227141 | NP_542782 | R | Q | RQ | benign            |
| rs10227922 | NP_000814 | T | S | TS | benign            |
| rs10228086 | NP_689957 | P | S | PS | possibly damaging |
| rs10228450 | XP_376587 | S | G | SG | possibly damaging |
| rs10228640 | XP_171158 | N | S | NS | benign            |
| rs10229132 | NP_037453 | T | I | TI | possibly damaging |
| rs10230120 | NP_056013 | D | A | DA | benign            |
| rs10230228 | XP_498253 | Q | K | QK | benign            |
| rs10230714 | XP_371933 | M | V | MV | benign            |
| rs10231065 | XP_291200 | D | A | DA | benign            |
| rs10231144 | NP_071889 | T | M | TM | benign            |
| rs10233232 | XP_059832 | M | T | MT | benign            |
| rs10233245 | XP_376720 | H | R | HR | benign            |
| rs10233493 | XP_166571 | L | I | LI | benign            |
| rs10234446 | XP_088142 | T | M | TM | benign            |
| rs10235352 | XP_168530 | E | D | ED | benign            |
| rs10235371 | NP_071399 | V | M | VM | benign            |
| rs10236656 | XP_059832 | D | E | DE | benign            |
| rs10237102 | XP_208373 | C | R | CR | benign            |
| rs10237382 | NP_076938 | G | A | GA | benign            |
| rs10239435 | NP_060124 | N | S | NS | benign            |
| rs10239632 | NP_660090 | P | A | PA | possibly damaging |
| rs10239950 | XP_374653 | C | S | CS | benign            |
| rs10240863 | NP_000713 | R | K | RK | benign            |
| rs10240864 | NP_000713 | R | K | RK | benign            |
| rs10240876 | NP_000713 | R | K | RK | benign            |
| rs10241147 | XP_291200 | A | T | AT | benign            |
| rs10241894 | NP_055812 | L | I | LI | benign            |
| rs10243185 | XP_166571 | D | E | DE | benign            |
| rs10245352 | XP_374396 | H | P | HP | probably damaging |
| rs10245678 | XP_039393 | V | M | VM | benign            |
| rs10245716 | XP_498220 | T | I | TI | benign            |
| rs10246361 | XP_376610 | G | S | GS | benign            |
| rs10246939 | NP_789787 | I | V | IV | benign            |
| rs10247878 | NP_113602 | S | I | SI | benign            |
| rs10247878 | NP_116562 | S | I | SI | benign            |

|            |           |   |   |    |                   |
|------------|-----------|---|---|----|-------------------|
| rs10249320 | NP_597725 | R | W | RW | possibly damaging |
| rs10250385 | XP_498171 | T | I | TI | benign            |
| rs10250417 | XP_376720 | E | D | ED | benign            |
| rs10250778 | NP_059488 | T | N | TN | benign            |
| rs10250905 | NP_057700 | R | C | RC | benign            |
| rs10251512 | XP_291247 | Q | E | QE | benign            |
| rs10251768 | NP_857597 | H | Q | HQ | possibly damaging |
| rs10252253 | XP_498253 | L | P | LP | benign            |
| rs10252951 | XP_376680 | N | K | NK | benign            |
| rs10253847 | NP_000713 | S | R | SR | benign            |
| rs10253916 | NP_004498 | D | N | DN | possibly damaging |
| rs10254120 | NP_000526 | R | Q | RQ | benign            |
| rs10254390 | XP_376680 | D | Y | DY | probably damaging |
| rs10254518 | XP_498257 | T | P | TP | benign            |
| rs10254784 | XP_496870 | G | S | GS | benign            |
| rs10255054 | NP_003566 | G | R | GR | possibly damaging |
| rs10255061 | NP_849149 | V | M | VM | benign            |
| rs10255558 | XP_374637 | P | L | PL | benign            |
| rs10255568 | XP_374637 | H | Q | HQ | benign            |
| rs10255741 | NP_061331 | L | V | LV | benign            |
| rs10255762 | NP_055066 | L | I | LI | benign            |
| rs10256887 | NP_006860 | S | G | SG | possibly damaging |
| rs10258719 | NP_570856 | A | V | AV | benign            |
| rs10258821 | XP_168578 | H | Y | HY | benign            |
| rs10258918 | NP_056360 | R | Q | RQ | benign            |
| rs10259802 | NP_000159 | N | K | NK | possibly damaging |
| rs10260215 | NP_036579 | A | T | AT | benign            |
| rs10260248 | NP_795363 | S | Y | SY | benign            |
| rs10260264 | XP_498257 | E | K | EK | benign            |
| rs10260959 | XP_376720 | L | V | LV | benign            |
| rs10261848 | XP_168530 | T | P | TP | benign            |
| rs10262855 | NP_060708 | V | M | VM | benign            |
| rs10263079 | NP_113602 | N | K | NK | benign            |
| rs10263079 | NP_116562 | N | K | NK | benign            |
| rs10263734 | XP_498220 | V | A | VA | benign            |
| rs10263797 | XP_498257 | S | P | SP | benign            |
| rs10264952 | NP_113602 | E | K | EK | benign            |
| rs10264952 | NP_116562 | E | K | EK | benign            |
| rs10264967 | NP_113602 | K | N | KN | benign            |
| rs10264967 | NP_116562 | K | N | KN | benign            |
| rs10265083 | NP_689839 | A | V | AV | benign            |
| rs10265966 | NP_067053 | A | D | AD | benign            |
| rs10265966 | NP_733751 | A | D | AD | possibly damaging |
| rs10266424 | NP_008911 | A | T | AT | benign            |
| rs10266536 | XP_373223 | A | T | AT | benign            |
| rs10266732 | NP_004659 | S | L | SL | possibly damaging |

|            |           |   |   |    |                   |
|------------|-----------|---|---|----|-------------------|
| rs10266866 | NP_057304 | C | G | CG | probably damaging |
| rs10269237 | NP_068579 | L | V | LV | benign            |
| rs10269893 | NP_001449 | E | D | ED | benign            |
| rs10270766 | NP_997056 | I | T | IT | possibly damaging |
| rs10270766 | NP_997055 | I | T | IT | possibly damaging |
| rs10271034 | XP_374637 | Q | R | QR | benign            |
| rs10271050 | XP_374637 | I | V | IV | benign            |
| rs10271058 | XP_374637 | H | L | HL | possibly damaging |
| rs10271996 | NP_787083 | P | S | PS | possibly damaging |
| rs10272498 | XP_496879 | V | A | VA | benign            |
| rs10272647 | XP_376567 | P | H | PH | benign            |
| rs10272756 | NP_115791 | A | P | AP | benign            |
| rs10274022 | NP_219499 | Q | K | QK | benign            |
| rs10274197 | XP_498220 | D | Y | DY | probably damaging |
| rs10275777 | XP_376618 | C | R | CR | benign            |
| rs10276748 | XP_166571 | P | S | PS | possibly damaging |
| rs10276874 | XP_166571 | L | P | LP | possibly damaging |
| rs10276886 | XP_166571 | S | L | SL | benign            |
| rs10276909 | XP_166571 | A | V | AV | benign            |
| rs10278721 | NP_795364 | L | P | LP | probably damaging |
| rs10279499 | NP_060124 | V | L | VL | benign            |
| rs10280467 | NP_112223 | D | Y | DY | probably damaging |
| rs10280704 | NP_000102 | R | Q | RQ | benign            |
| rs10281525 | NP_937794 | K | T | KT | benign            |
| rs10281879 | NP_066990 | S | G | SG | benign            |
| rs10282312 | NP_000074 | W | G | WG | possibly damaging |
| rs10282508 | XP_374489 | N | T | NT | benign            |
| rs10282929 | NP_116251 | I | M | IM | benign            |
| rs10282930 | NP_116251 | D | Y | DY | possibly damaging |
| rs10283100 | NP_006200 | P | S | PS | probably damaging |
| rs10305493 | NP_002053 | S | C | SC | benign            |
| rs10305510 | NP_002053 | R | Q | RQ | benign            |
| rs10305741 | NP_848514 | D | E | DE | benign            |
| rs10305741 | NP_001659 | D | E | DE | benign            |
| rs10306140 | NP_000953 | R | L | RL | probably damaging |
| rs10306140 | NP_542158 | R | L | RL | probably damaging |
| rs10317141 | NP_219480 | F | C | FC | benign            |
| rs10396209 | NP_005496 | V | I | VI | benign            |
| rs10396213 | NP_005496 | S | G | SG | benign            |
| rs10400212 | NP_861462 | D | N | DN | benign            |
| rs10400391 | NP_000343 | L | V | LV | benign            |
| rs10401088 | XP_497598 | M | V | MV | benign            |
| rs10401716 | NP_775815 | L | F | LF | benign            |
| rs10401800 | NP_055290 | A | P | AP | possibly damaging |
| rs10402252 | NP_005806 | T | K | TK | benign            |
| rs10402349 | XP_497611 | S | G | SG | possibly damaging |

|            |           |   |   |    |                   |
|------------|-----------|---|---|----|-------------------|
| rs10402397 | NP_057541 | A | T | AT | benign            |
| rs10402855 | NP_115661 | G | A | GA | benign            |
| rs10403008 | NP_689813 | E | D | ED | benign            |
| rs10403407 | NP_059979 | L | F | LF | benign            |
| rs10403702 | XP_086001 | L | P | LP | probably damaging |
| rs10403922 | XP_371140 | A | V | AV | benign            |
| rs10404036 | NP_067008 | D | H | DH | benign            |
| rs10404119 | NP_112163 | A | S | AS | benign            |
| rs10404156 | NP_659483 | D | N | DN | benign            |
| rs10404195 | XP_375560 | R | H | RH | benign            |
| rs10404519 | NP_115823 | E | K | EK | benign            |
| rs10404860 | NP_055699 | M | T | MT | benign            |
| rs10405129 | NP_112163 | I | T | IT | possibly damaging |
| rs10405148 | NP_112163 | V | A | VA | benign            |
| rs10405238 | XP_058997 | Y | D | YD | probably damaging |
| rs10405305 | NP_150651 | A | G | AG | benign            |
| rs10405305 | NP_061985 | A | G | AG | benign            |
| rs10405368 | NP_694965 | L | V | LV | benign            |
| rs10405713 | NP_005865 | T | A | TA | benign            |
| rs10406069 | NP_001762 | G | D | GD | possibly damaging |
| rs10406087 | NP_699190 | V | A | VA | benign            |
| rs10406301 | NP_036446 | S | C | SC | benign            |
| rs10406301 | NP_839942 | S | C | SC | benign            |
| rs10406453 | NP_945339 | H | R | HR | benign            |
| rs10406580 | NP_001965 | V | L | VL | benign            |
| rs10406745 | NP_000426 | R | H | RH | probably damaging |
| rs10406757 | NP_699160 | A | T | AT | benign            |
| rs10407022 | NP_000470 | I | S | IS | possibly damaging |
| rs10407035 | NP_073746 | R | H | RH | probably damaging |
| rs10407115 | NP_808211 | A | V | AV | benign            |
| rs10407115 | NP_803545 | A | V | AV | benign            |
| rs10407239 | XP_496282 | A | V | AV | benign            |
| rs10407503 | NP_004354 | A | D | AD | benign            |
| rs10407985 | NP_065931 | H | L | HL | possibly damaging |
| rs10408046 | NP_006857 | V | L | VL | benign            |
| rs10408052 | XP_059051 | E | K | EK | benign            |
| rs10408265 | NP_612463 | N | S | NS | benign            |
| rs10408494 | NP_055243 | G | D | GD | possibly damaging |
| rs10408676 | NP_000426 | V | M | VM | benign            |
| rs10408787 | XP_496291 | R | W | RW | possibly damaging |
| rs10409124 | NP_037535 | V | I | VI | benign            |
| rs10409482 | NP_057524 | C | Y | CY | probably damaging |
| rs10409531 | NP_065879 | A | V | AV | benign            |
| rs10409852 | NP_036598 | T | A | TA | benign            |
| rs10409962 | NP_055257 | S | P | SP | probably damaging |
| rs10410030 | NP_060825 | N | D | ND | benign            |

|            |           |   |   |    |                   |
|------------|-----------|---|---|----|-------------------|
| rs10410075 | NP_057524 | S | L | SL | possibly damaging |
| rs10410201 | XP_290865 | R | C | RC | benign            |
| rs10410649 | NP_998763 | M | V | MV | benign            |
| rs10410877 | NP_003429 | R | C | RC | possibly damaging |
| rs10410943 | NP_848620 | A | V | AV | benign            |
| rs10411092 | NP_659483 | D | G | DG | possibly damaging |
| rs10411314 | NP_612635 | N | D | ND | benign            |
| rs10411329 | XP_290865 | K | E | KE | benign            |
| rs10411486 | NP_998763 | V | D | VD | possibly damaging |
| rs10411650 | NP_006693 | D | N | DN | possibly damaging |
| rs10412348 | NP_002776 | E | K | EK | benign            |
| rs10412348 | NP_976032 | E | K | EK | benign            |
| rs10412527 | NP_694989 | R | T | RT | benign            |
| rs10412720 | NP_005588 | A | S | AS | benign            |
| rs10412720 | NP_995315 | A | S | AS | benign            |
| rs10412828 | NP_056507 | Q | P | QP | benign            |
| rs10412932 | NP_006201 | D | G | DG | possibly damaging |
| rs10413187 | XP_292832 | Q | K | QK | benign            |
| rs10413538 | XP_290865 | R | K | RK | benign            |
| rs10413646 | NP_000914 | S | L | SL | probably damaging |
| rs10413655 | NP_005018 | A | V | AV | benign            |
| rs10413818 | XP_114000 | E | K | EK | benign            |
| rs10413864 | NP_612356 | N | S | NS | benign            |
| rs10414166 | NP_002776 | N | D | ND | benign            |
| rs10414166 | NP_976032 | N | D | ND | benign            |
| rs10414255 | XP_372709 | M | V | MV | benign            |
| rs10414485 | XP_091914 | C | Y | CY | benign            |
| rs10414535 | NP_055699 | Q | R | QR | benign            |
| rs10414597 | NP_006660 | L | V | LV | benign            |
| rs10414812 | NP_778148 | R | H | RH | benign            |
| rs10414834 | NP_787106 | V | L | VL | possibly damaging |
| rs10414971 | NP_110451 | P | S | PS | benign            |
| rs10415018 | NP_065746 | V | A | VA | benign            |
| rs10415207 | NP_110451 | P | T | PT | benign            |
| rs10415287 | NP_689576 | A | T | AT | benign            |
| rs10415298 | XP_497611 | I | M | IM | possibly damaging |
| rs10415312 | NP_945182 | E | K | EK | benign            |
| rs10415373 | NP_003361 | A | T | AT | benign            |
| rs10415562 | NP_945182 | V | I | VI | benign            |
| rs10415690 | XP_375646 | T | A | TA | benign            |
| rs10416265 | NP_060495 | H | R | HR | benign            |
| rs10416584 | NP_689688 | S | N | SN | benign            |
| rs10416686 | NP_689688 | S | R | SR | possibly damaging |
| rs10416861 | NP_055331 | S | A | SA | benign            |
| rs10416895 | XP_497611 | A | T | AT | benign            |
| rs10416906 | XP_497611 | R | H | RH | possibly damaging |

|            |           |   |   |    |                   |
|------------|-----------|---|---|----|-------------------|
| rs10417158 | NP_006854 | D | E | DE | possibly damaging |
| rs10417532 | XP_375606 | F | S | FS | possibly damaging |
| rs10417589 | NP_006854 | S | G | SG | benign            |
| rs10417624 | XP_371174 | R | I | RI | possibly damaging |
| rs10417628 | NP_000470 | A | V | AV | benign            |
| rs10417633 | XP_058964 | A | T | AT | benign            |
| rs10417977 | NP_079337 | R | H | RH | benign            |
| rs10418195 | NP_056507 | D | N | DN | benign            |
| rs10418391 | NP_006854 | R | H | RH | benign            |
| rs10418474 | XP_292832 | K | R | KR | benign            |
| rs10418552 | NP_006660 | S | R | SR | benign            |
| rs10418734 | XP_292832 | K | E | KE | benign            |
| rs10418913 | NP_003250 | V | M | VM | benign            |
| rs10418929 | NP_112219 | A | S | AS | benign            |
| rs10419012 | XP_292832 | G | E | GE | possibly damaging |
| rs10419038 | XP_209178 | R | C | RC | probably damaging |
| rs10419077 | NP_115746 | L | P | LP | possibly damaging |
| rs10419085 | NP_006660 | S | T | ST | benign            |
| rs10419548 | XP_292724 | Q | R | QR | benign            |
| rs10419604 | NP_037512 | T | K | TK | benign            |
| rs10419826 | XP_030958 | G | R | GR | benign            |
| rs10419832 | NP_036408 | I | V | IV | benign            |
| rs10420313 | NP_112219 | L | R | LR | benign            |
| rs10420364 | XP_091914 | Y | C | YC | probably damaging |
| rs10420643 | NP_001450 | T | S | TS | benign            |
| rs10420644 | NP_077011 | T | A | TA | benign            |
| rs10421235 | NP_005026 | V | L | VL | benign            |
| rs10421308 | XP_064903 | R | K | RK | benign            |
| rs10421387 | NP_076433 | G | W | GW | probably damaging |
| rs10421552 | NP_689475 | P | S | PS | benign            |
| rs10421632 | XP_372753 | V | I | VI | benign            |
| rs10421670 | XP_209204 | W | R | WR | probably damaging |
| rs10421769 | NP_060495 | L | S | LS | benign            |
| rs10422025 | XP_375558 | A | V | AV | benign            |
| rs10422063 | NP_005806 | F | C | FC | probably damaging |
| rs10422163 | XP_064903 | Y | F | YF | benign            |
| rs10422648 | NP_699160 | S | T | ST | benign            |
| rs10422863 | NP_954672 | H | Y | HY | benign            |
| rs10422863 | NP_057669 | H | Y | HY | benign            |
| rs10422897 | NP_005542 | W | R | WR | probably damaging |
| rs10422944 | XP_497611 | C | R | CR | benign            |
| rs10423025 | XP_377506 | R | T | RT | benign            |
| rs10423171 | NP_004354 | R | S | RS | benign            |
| rs10423273 | NP_110451 | I | V | IV | benign            |
| rs10423345 | XP_372719 | H | R | HR | probably damaging |
| rs10423355 | XP_058964 | V | A | VA | benign            |

|            |           |   |   |    |                   |
|------------|-----------|---|---|----|-------------------|
| rs10423424 | NP_945339 | R | P | RP | possibly damaging |
| rs10424687 | NP_001740 | L | F | LF | benign            |
| rs10424707 | XP_497610 | L | R | LR | possibly damaging |
| rs10425108 | NP_037538 | E | D | ED | benign            |
| rs10425108 | NP_037539 | E | D | ED | benign            |
| rs10425108 | NP_001921 | E | D | ED | benign            |
| rs10425120 | XP_047554 | S | N | SN | benign            |
| rs10425120 | XP_047550 | S | N | SN | benign            |
| rs10425169 | NP_000755 | C | R | CR | benign            |
| rs10425176 | NP_000755 | F | I | FI | benign            |
| rs10425452 | NP_870998 | R | C | RC | probably damaging |
| rs10425606 | NP_062829 | I | S | IS | probably damaging |
| rs10425706 | NP_872415 | G | E | GE | benign            |
| rs10425835 | NP_065139 | I | L | IL | benign            |
| rs10425917 | NP_004136 | L | I | LI | benign            |
| rs10425951 | XP_292723 | S | T | ST | benign            |
| rs10425981 | NP_006854 | Y | H | YH | benign            |
| rs10425995 | NP_003428 | Y | C | YC | benign            |
| rs10426017 | XP_371139 | I | M | IM | benign            |
| rs10426122 | NP_001775 | S | Y | SY | possibly damaging |
| rs10426122 | NP_510966 | S | Y | SY | possibly damaging |
| rs10426206 | XP_208204 | C | S | CS | probably damaging |
| rs10426537 | NP_004377 | S | N | SN | benign            |
| rs10426545 | NP_056507 | R | W | RW | benign            |
| rs10427116 | XP_496299 | I | V | IV | benign            |
| rs10427371 | NP_055312 | S | N | SN | benign            |
| rs10428037 | NP_620169 | T | I | TI | benign            |
| rs10428775 | XP_496813 | R | C | RC | benign            |
| rs10429965 | NP_002488 | N | S | NS | benign            |
| rs10431277 | XP_497335 | L | F | LF | benign            |
| rs10432667 | NP_751946 | N | D | ND | benign            |
| rs10432667 | NP_006863 | N | D | ND | benign            |
| rs10433337 | NP_060864 | K | R | KR | benign            |
| rs10435864 | XP_376903 | H | Q | HQ | possibly damaging |
| rs10437090 | XP_497670 | G | R | GR | benign            |
| rs10438246 | XP_290629 | M | V | MV | benign            |
| rs10439534 | XP_376074 | G | A | GA | benign            |
| rs10440603 | XP_496692 | R | Q | RQ | benign            |
| rs10440604 | XP_496692 | M | T | MT | benign            |
| rs10440606 | XP_496692 | D | E | DE | benign            |
| rs10440608 | XP_496692 | H | Q | HQ | benign            |
| rs10441509 | NP_803875 | V | I | VI | benign            |
| rs10441685 | NP_777583 | S | C | SC | benign            |
| rs10441706 | NP_060264 | V | I | VI | benign            |
| rs10441778 | NP_001994 | G | D | GD | benign            |
| rs10443824 | XP_496692 | D | Y | DY | benign            |

|            |           |   |   |    |                   |
|------------|-----------|---|---|----|-------------------|
| rs10444913 | XP_370826 | H | R | HR | probably damaging |
| rs10444914 | XP_370826 | G | V | GV | possibly damaging |
| rs10445216 | NP_001979 | Y | C | YC | probably damaging |
| rs10445337 | NP_058519 | S | P | SP | possibly damaging |
| rs10447012 | XP_496691 | N | K | NK | benign            |
| rs10447013 | XP_496691 | V | I | VI | benign            |
| rs10447150 | XP_380175 | R | W | RW | possibly damaging |
| rs10447293 | NP_055644 | E | Q | EQ | benign            |
| rs10449773 | XP_496332 | S | P | SP | benign            |
| rs10450321 | XP_495802 | F | S | FS | possibly damaging |
| rs10450603 | XP_372357 | R | C | RC | probably damaging |
| rs10450844 | NP_002258 | E | K | EK | benign            |
| rs10450845 | NP_002258 | D | N | DN | benign            |
| rs10450846 | NP_002258 | E | K | EK | benign            |
| rs10451269 | NP_998772 | A | V | AV | benign            |
| rs10454320 | NP_733751 | T | S | TS | benign            |
| rs10454373 | XP_498328 | P | S | PS | possibly damaging |
| rs10454374 | XP_498328 | A | P | AP | benign            |
| rs10454784 | XP_171032 | V | L | VL | benign            |
| rs10454915 | NP_006624 | N | S | NS | benign            |
| rs10455057 | NP_660325 | G | R | GR | benign            |
| rs10455097 | NP_598000 | Y | S | YS | benign            |
| rs10455840 | NP_114130 | R | Q | RQ | possibly damaging |
| rs10456399 | NP_115859 | M | T | MT | possibly damaging |
| rs10456521 | NP_057034 | S | F | SF | possibly damaging |
| rs10457191 | XP_168055 | A | V | AV | benign            |
| rs10458105 | NP_001709 | R | C | RC | probably damaging |
| rs10458342 | NP_001447 | R | C | RC | probably damaging |
| rs10458462 | NP_002950 | S | F | SF | possibly damaging |
| rs10458463 | NP_002950 | T | I | TI | possibly damaging |
| rs10458896 | NP_112494 | I | V | IV | benign            |
| rs10459504 | NP_002683 | T | P | TP | benign            |
| rs10459809 | NP_001288 | L | I | LI | benign            |
| rs10459872 | NP_689550 | Y | H | YH | benign            |
| rs10460212 | XP_371155 | T | M | TM | benign            |
| rs10462014 | NP_000056 | S | F | SF | possibly damaging |
| rs10462020 | NP_058515 | V | G | VG | benign            |
| rs10464523 | NP_005754 | E | K | EK | benign            |
| rs10465129 | XP_376903 | L | F | LF | benign            |
| rs10465613 | NP_000072 | S | N | SN | benign            |
| rs10466026 | NP_071407 | E | K | EK | benign            |
| rs10466126 | NP_004083 | A | V | AV | benign            |
| rs10466659 | XP_497298 | V | A | VA | benign            |
| rs10470742 | NP_068746 | T | I | TI | possibly damaging |
| rs10471371 | NP_002194 | K | E | KE | benign            |
| rs10472941 | NP_056392 | V | L | VL | benign            |



|            |           |   |   |    |                   |
|------------|-----------|---|---|----|-------------------|
| rs10475299 | XP_029101 | K | E | KE | benign            |
| rs10475633 | NP_057374 | G | E | GE | possibly damaging |
| rs10476822 | NP_037472 | T | I | TI | possibly damaging |
| rs10479584 | NP_002397 | S | F | SF | possibly damaging |
| rs10479619 | NP_071916 | S | N | SN | benign            |
| rs10481074 | NP_114415 | H | Y | HY | probably damaging |
| rs10482721 | NP_003229 | R | H | RH | possibly damaging |
| rs10482810 | NP_003229 | V | L | VL | benign            |
| rs10484830 | NP_940870 | P | L | PL | possibly damaging |
| rs10484847 | NP_001362 | V | I | VI | benign            |
| rs10485183 | NP_037484 | T | I | TI | benign            |
| rs10486180 | XP_295195 | I | V | IV | benign            |
| rs10487075 | NP_857597 | E | K | EK | benign            |
| rs10487647 | XP_168530 | L | P | LP | probably damaging |
| rs10487648 | XP_168530 | F | L | FL | benign            |
| rs10488532 | XP_374489 | V | I | VI | benign            |
| rs10488698 | NP_116114 | R | C | RC | possibly damaging |
| rs10489177 | NP_219486 | E | D | ED | benign            |
| rs10489579 | NP_060143 | V | I | VI | benign            |
| rs10489990 | NP_056532 | A | V | AV | benign            |
| rs10490252 | XP_290345 | I | T | IT | possibly damaging |
| rs10493753 | NP_071749 | V | L | VL | benign            |
| rs10493821 | NP_060754 | V | M | VM | benign            |
| rs10494217 | XP_371284 | H | N | HN | probably damaging |
| rs10494745 | NP_006675 | G | E | GE | possibly damaging |
| rs10494751 | NP_919290 | D | Y | DY | possibly damaging |
| rs10494755 | NP_061922 | G | S | GS | possibly damaging |
| rs10497199 | XP_043500 | A | T | AT | benign            |
| rs10497377 | NP_954697 | G | V | GV | probably damaging |
| rs10497410 | NP_078859 | D | N | DN | benign            |
| rs10497520 | NP_596870 | K | E | KE | benign            |
| rs10497529 | XP_496613 | A | V | AV | benign            |
| rs10498796 | NP_055279 | H | R | HR | probably damaging |
| rs10499052 | XP_376527 | P | S | PS | possibly damaging |
| rs10500209 | NP_689475 | L | S | LS | benign            |
| rs10500210 | NP_110451 | R | C | RC | possibly damaging |
| rs10500311 | NP_940882 | T | M | TM | benign            |
| rs10500557 | NP_008892 | R | Q | RQ | benign            |
| rs10501429 | NP_078954 | T | N | TN | possibly damaging |
| rs10501999 | XP_497316 | H | R | HR | probably damaging |
| rs10502001 | NP_002414 | R | H | RH | benign            |
| rs10503867 | XP_047083 | N | K | NK | benign            |
| rs10503929 | NP_039250 | M | T | MT | benign            |
| rs10503929 | NP_039251 | M | T | MT | benign            |
| rs10503929 | NP_039254 | M | T | MT | benign            |
| rs10503929 | NP_039258 | M | T | MT | benign            |

|            |           |   |   |    |                   |
|------------|-----------|---|---|----|-------------------|
| rs10505769 | XP_495912 | N | D | ND | benign            |
| rs10505830 | NP_149114 | S | L | SL | possibly damaging |
| rs10506821 | XP_374987 | G | A | GA | possibly damaging |
| rs10507047 | XP_370702 | Q | R | QR | benign            |
| rs10507051 | NP_060069 | I | V | IV | benign            |
| rs10507274 | NP_079014 | Q | R | QR | possibly damaging |
| rs10509305 | NP_689922 | E | D | ED | benign            |
| rs10509332 | NP_734465 | A | T | AT | benign            |
| rs10509681 | NP_000761 | K | R | KR | possibly damaging |
| rs10510108 | NP_653188 | Q | R | QR | benign            |
| rs10511670 | NP_060115 | H | Q | HQ | benign            |
| rs10511687 | NP_060264 | L | S | LS | benign            |
| rs10512243 | NP_064592 | A | T | AT | benign            |
| rs10512330 | XP_071097 | K | T | KT | possibly damaging |
| rs10512472 | XP_496207 | Q | R | QR | benign            |
| rs10512538 | XP_497555 | M | T | MT | probably damaging |
| rs10512599 | NP_001536 | L | F | LF | benign            |
| rs10512747 | NP_115976 | S | L | SL | benign            |
| rs10513155 | NP_001360 | L | F | LF | benign            |
| rs10513680 | NP_872416 | E | D | ED | benign            |
| rs10513762 | NP_065142 | R | H | RH | possibly damaging |
| rs10513762 | NP_817125 | R | H | RH | possibly damaging |
| rs10516487 | NP_060405 | R | H | RH | benign            |
| rs10516782 | NP_542415 | I | M | IM | benign            |
| rs10516782 | NP_542416 | I | M | IM | benign            |
| rs10516782 | NP_006255 | I | M | IM | benign            |
| rs10516782 | NP_542414 | I | M | IM | benign            |
| rs10517577 | NP_775933 | M | V | MV | possibly damaging |
| rs10518816 | XP_370866 | V | L | VL | benign            |
| rs10519020 | NP_004203 | S | T | ST | benign            |
| rs10519996 | NP_542381 | P | R | PR | probably damaging |
| rs10521028 | XP_497071 | Y | C | YC | probably damaging |
| rs10521092 | NP_003631 | M | K | MK | benign            |
| rs10521938 | NP_997202 | F | L | FL | possibly damaging |
| rs10521939 | NP_997202 | Q | E | QE | benign            |
| rs10732273 | XP_046531 | L | P | LP | probably damaging |
| rs10733133 | NP_002499 | I | V | IV | benign            |
| rs10735005 | NP_758952 | V | I | VI | benign            |
| rs10735309 | NP_055718 | A | T | AT | benign            |
| rs10735810 | NP_000367 | M | T | MT | probably damaging |
| rs10736904 | XP_290540 | P | S | PS | benign            |
| rs10739614 | XP_071150 | R | P | RP | possibly damaging |
| rs10742772 | NP_476515 | I | V | IV | benign            |
| rs10742772 | NP_004804 | I | V | IV | benign            |
| rs10742787 | XP_372364 | A | T | AT | benign            |
| rs10742809 | XP_372366 | M | R | MR | benign            |

|            |           |   |   |    |                   |
|------------|-----------|---|---|----|-------------------|
| rs10742909 | XP_372378 | P | L | PL | possibly damaging |
| rs10743108 | NP_003433 | Q | E | QE | benign            |
| rs10743251 | XP_495906 | T | A | TA | benign            |
| rs10743252 | XP_495906 | R | C | RC | probably damaging |
| rs10743253 | XP_495906 | K | Q | KQ | benign            |
| rs10743597 | NP_000005 | V | I | VI | benign            |
| rs10743938 | NP_795366 | M | L | ML | benign            |
| rs10744982 | NP_060028 | T | A | TA | benign            |
| rs10747049 | NP_037511 | G | A | GA | possibly damaging |
| rs10747493 | NP_001717 | L | P | LP | benign            |
| rs10747493 | NP_997072 | L | P | LP | benign            |
| rs10747556 | NP_149115 | H | R | HR | benign            |
| rs10749138 | NP_006166 | I | V | IV | benign            |
| rs10749138 | NP_932326 | I | V | IV | benign            |
| rs10749920 | NP_055880 | L | P | LP | benign            |
| rs10750250 | XP_291838 | C | Y | CY | possibly damaging |
| rs10750270 | XP_210186 | E | G | EG | benign            |
| rs10750931 | NP_683876 | K | E | KE | benign            |
| rs10751454 | XP_371207 | S | G | SG | benign            |
| rs10751676 | XP_290540 | K | Q | KQ | benign            |
| rs10759326 | NP_003631 | I | L | IL | benign            |
| rs10760252 | XP_373315 | Q | K | QK | benign            |
| rs10760500 | NP_733745 | L | F | LF | benign            |
| rs10760502 | NP_004948 | I | V | IV | benign            |
| rs10760517 | NP_003854 | T | S | TS | benign            |
| rs10761054 | XP_210752 | F | L | FL | benign            |
| rs10761073 | XP_210755 | S | L | SL | benign            |
| rs10761084 | NP_060846 | A | P | AP | possibly damaging |
| rs10761129 | NP_004551 | V | I | VI | benign            |
| rs10764176 | NP_689938 | S | G | SG | benign            |
| rs10764749 | NP_002408 | R | Q | RQ | benign            |
| rs10765565 | XP_061871 | V | L | VL | benign            |
| rs10766466 | NP_954630 | V | A | VA | benign            |
| rs10768448 | XP_061614 | T | I | TI | benign            |
| rs10768450 | XP_061614 | A | V | AV | benign            |
| rs10768611 | NP_036507 | P | S | PS | benign            |
| rs10768907 | XP_372354 | F | L | FL | benign            |
| rs10769086 | XP_291806 | V | I | VI | benign            |
| rs10769224 | XP_372364 | C | Y | CY | probably damaging |
| rs10769272 | XP_372366 | F | L | FL | benign            |
| rs10769629 | XP_497281 | R | W | RW | possibly damaging |
| rs10769633 | XP_497281 | R | L | RL | possibly damaging |
| rs10769671 | NP_775796 | S | P | SP | possibly damaging |
| rs10769699 | NP_653267 | R | H | RH | benign            |
| rs10769716 | XP_495863 | H | N | HN | benign            |
| rs10770740 | XP_497329 | S | R | SR | possibly damaging |

|            |           |   |   |    |                   |
|------------|-----------|---|---|----|-------------------|
| rs10771314 | NP_057635 | P | L | PL | probably damaging |
| rs10771427 | NP_060788 | M | V | MV | benign            |
| rs10772256 | NP_002253 | A | S | AS | benign            |
| rs10772423 | NP_795366 | V | I | VI | benign            |
| rs10773019 | NP_065987 | N | S | NS | benign            |
| rs10774978 | NP_115676 | K | R | KR | benign            |
| rs10775327 | XP_375357 | G | V | GV | probably damaging |
| rs10775648 | NP_055401 | R | C | RC | possibly damaging |
| rs10776722 | XP_086604 | R | G | RG | benign            |
| rs10776792 | NP_000540 | A | T | AT | benign            |
| rs10777084 | NP_689802 | Q | R | QR | benign            |
| rs10778679 | XP_291989 | E | Q | EQ | benign            |
| rs10779261 | NP_009054 | A | T | AT | benign            |
| rs10781150 | XP_071201 | T | I | TI | possibly damaging |
| rs10781365 | NP_954586 | H | Q | HQ | possibly damaging |
| rs10783071 | NP_001717 | Q | K | QK | benign            |
| rs10783071 | NP_997072 | Q | K | QK | benign            |
| rs10783229 | NP_000280 | R | Q | RQ | benign            |
| rs10783231 | XP_370691 | E | D | ED | benign            |
| rs10783299 | XP_290598 | E | G | EG | benign            |
| rs10783518 | NP_258259 | V | G | VG | benign            |
| rs10783528 | NP_778253 | N | D | ND | benign            |
| rs10785923 | XP_061427 | P | Q | PQ | probably damaging |
| rs10786775 | NP_079204 | C | S | CS | probably damaging |
| rs10786783 | NP_660290 | D | G | DG | benign            |
| rs10787428 | NP_065969 | E | G | EG | possibly damaging |
| rs10788652 | XP_378840 | I | T | IT | benign            |
| rs10788828 | XP_373868 | T | M | TM | benign            |
| rs10789501 | XP_208213 | C | R | CR | probably damaging |
| rs10790610 | XP_291838 | F | L | FL | benign            |
| rs10790715 | NP_689935 | V | M | VM | benign            |
| rs10790978 | NP_055176 | S | A | SA | benign            |
| rs10791893 | XP_166820 | V | L | VL | benign            |
| rs10791961 | XP_166805 | S | C | SC | benign            |
| rs10791962 | XP_166805 | T | S | TS | benign            |
| rs10792043 | XP_372400 | V | L | VL | benign            |
| rs10792156 | NP_997257 | Q | R | QR | benign            |
| rs10793624 | XP_495809 | R | G | RG | benign            |
| rs10793625 | XP_495809 | L | V | LV | benign            |
| rs10794323 | XP_374860 | C | R | CR | possibly damaging |
| rs10794324 | XP_374860 | I | V | IV | benign            |
| rs10794531 | NP_775845 | H | R | HR | benign            |
| rs10794532 | NP_775845 | D | G | DG | possibly damaging |
| rs10794537 | NP_000194 | Q | H | QH | benign            |
| rs10794630 | XP_496028 | D | G | DG | benign            |
| rs10795446 | NP_001072 | P | T | PT | benign            |

|            |           |   |   |    |                   |
|------------|-----------|---|---|----|-------------------|
| rs10796795 | NP_954714 | A | G | AG | benign            |
| rs10797300 | NP_803564 | P | L | PL | probably damaging |
| rs10797300 | NP_001045 | P | L | PL | probably damaging |
| rs10798333 | XP_040527 | T | M | TM | benign            |
| rs10799790 | NP_361013 | N | D | ND | benign            |
| rs10801922 | NP_065173 | V | I | VI | benign            |
| rs10801999 | NP_001223 | V | M | VM | benign            |
| rs10803354 | NP_963922 | T | A | TA | benign            |
| rs10804117 | NP_689738 | Q | H | QH | benign            |
| rs10804166 | XP_371592 | S | G | SG | benign            |
| rs10804567 | XP_087386 | V | L | VL | benign            |
| rs10805890 | NP_000512 | I | V | IV | benign            |
| rs10807372 | NP_722581 | K | E | KE | benign            |
| rs10813831 | NP_055129 | R | C | RC | possibly damaging |
| rs10814542 | XP_497020 | K | N | KN | benign            |
| rs10814571 | NP_071935 | R | K | RK | benign            |
| rs10817479 | NP_660284 | P | S | PS | possibly damaging |
| rs10817493 | NP_652760 | W | C | WC | probably damaging |
| rs10817610 | NP_056219 | H | R | HR | possibly damaging |
| rs10817858 | NP_640339 | A | D | AD | benign            |
| rs10818503 | NP_008949 | I | V | IV | benign            |
| rs10818504 | NP_008949 | P | L | PL | benign            |
| rs10818708 | NP_036495 | P | S | PS | benign            |
| rs10818740 | XP_373315 | R | Q | RQ | benign            |
| rs10818741 | XP_373315 | M | I | MI | benign            |
| rs10820709 | XP_210755 | Q | H | QH | benign            |
| rs10820900 | NP_004551 | T | A | TA | benign            |
| rs10821026 | XP_498335 | R | W | RW | probably damaging |
| rs10821668 | NP_066267 | K | R | KR | benign            |
| rs10823148 | NP_115967 | F | L | FL | possibly damaging |
| rs10823229 | NP_085128 | D | G | DG | benign            |
| rs10823320 | NP_079406 | D | G | DG | probably damaging |
| rs10823607 | NP_542453 | L | P | LP | benign            |
| rs10823607 | NP_631894 | P | L | PL | benign            |
| rs10825269 | NP_149045 | G | S | GS | benign            |
| rs10826469 | XP_377109 | P | S | PS | possibly damaging |
| rs10828317 | NP_005019 | N | S | NS | benign            |
| rs10828395 | NP_775104 | Q | R | QR | benign            |
| rs10828663 | XP_495798 | A | T | AT | benign            |
| rs10828676 | NP_065875 | T | S | TS | benign            |
| rs10829163 | XP_374779 | V | I | VI | benign            |
| rs10830339 | NP_710163 | N | K | NK | possibly damaging |
| rs10830430 | NP_005458 | I | V | IV | benign            |
| rs10830897 | XP_497314 | P | L | PL | possibly damaging |
| rs10830902 | XP_061864 | S | F | SF | benign            |
| rs10831088 | XP_374922 | R | Q | RQ | benign            |

|            |           |   |   |    |                   |
|------------|-----------|---|---|----|-------------------|
| rs10831519 | NP_079001 | Q | R | QR | benign            |
| rs10832747 | XP_039218 | R | L | RL | possibly damaging |
| rs10832914 | NP_954630 | A | V | AV | benign            |
| rs10833049 | NP_473371 | N | S | NS | possibly damaging |
| rs10837771 | NP_149419 | M | T | MT | benign            |
| rs10837814 | NP_149420 | F | L | FL | benign            |
| rs10838092 | XP_372355 | T | I | TI | possibly damaging |
| rs10838093 | XP_372355 | C | R | CR | possibly damaging |
| rs10838094 | XP_372355 | V | I | VI | benign            |
| rs10838095 | XP_372355 | R | H | RH | probably damaging |
| rs10838525 | NP_149023 | Q | R | QR | benign            |
| rs10838525 | NP_149083 | Q | R | QR | benign            |
| rs10838525 | NP_149084 | Q | R | QR | benign            |
| rs10838719 | XP_372366 | W | R | WR | benign            |
| rs10838852 | XP_372376 | P | S | PS | possibly damaging |
| rs10839435 | XP_497281 | R | H | RH | benign            |
| rs10839531 | XP_062263 | H | R | HR | possibly damaging |
| rs10839551 | NP_659477 | A | T | AT | benign            |
| rs10839564 | NP_000604 | D | N | DN | benign            |
| rs10839601 | XP_495863 | S | F | SF | possibly damaging |
| rs10839602 | XP_495863 | V | M | VM | possibly damaging |
| rs10839604 | XP_495863 | I | M | IM | benign            |
| rs10839616 | XP_291980 | R | P | RP | probably damaging |
| rs10839631 | XP_291981 | H | R | HR | benign            |
| rs10839632 | XP_291981 | I | T | IT | benign            |
| rs10839635 | NP_997069 | R | Q | RQ | benign            |
| rs10839658 | XP_062285 | L | I | LI | benign            |
| rs10839659 | XP_062285 | W | S | WS | probably damaging |
| rs10839708 | NP_789792 | E | K | EK | benign            |
| rs10839849 | NP_937828 | P | S | PS | possibly damaging |
| rs10841404 | XP_498535 | F | L | FL | benign            |
| rs10841795 | NP_602307 | I | T | IT | benign            |
| rs10842971 | NP_002855 | I | N | IN | probably damaging |
| rs10845279 | NP_795370 | R | L | RL | benign            |
| rs10845280 | NP_795370 | F | S | FS | benign            |
| rs10845281 | NP_795370 | I | V | IV | benign            |
| rs10845293 | NP_795366 | A | V | AV | benign            |
| rs10845294 | NP_795366 | Q | E | QE | possibly damaging |
| rs10845295 | NP_795366 | R | W | RW | probably damaging |
| rs10845659 | XP_370681 | Q | R | QR | benign            |
| rs10845981 | NP_703150 | G | E | GE | benign            |
| rs10849482 | NP_055680 | V | M | VM | benign            |
| rs10850256 | NP_057280 | K | R | KR | benign            |
| rs10851704 | NP_060154 | S | N | SN | benign            |
| rs10851894 | NP_001027 | I | V | IV | benign            |
| rs10852434 | NP_003860 | G | R | GR | benign            |

|            |           |   |   |    |                   |
|------------|-----------|---|---|----|-------------------|
| rs10852434 | NP_932327 | G | R | GR | benign            |
| rs10852462 | NP_060460 | I | V | IV | benign            |
| rs10852891 | NP_004861 | A | T | AT | benign            |
| rs10852985 | NP_694960 | I | V | IV | benign            |
| rs10853217 | XP_091830 | S | G | SG | benign            |
| rs10853751 | NP_064543 | T | M | TM | benign            |
| rs10857971 | NP_005158 | I | V | IV | benign            |
| rs10859974 | NP_872302 | M | V | MV | benign            |
| rs10864004 | XP_086616 | I | T | IT | benign            |
| rs10864628 | NP_803883 | K | E | KE | benign            |
| rs10864628 | NP_619642 | K | E | KE | benign            |
| rs10868138 | NP_071410 | Y | C | YC | probably damaging |
| rs10868420 | XP_497064 | D | G | DG | probably damaging |
| rs10868670 | NP_849150 | E | V | EV | benign            |
| rs10871453 | NP_078947 | D | E | DE | benign            |
| rs10872670 | NP_005091 | K | E | KE | benign            |
| rs10872670 | NP_653080 | K | E | KE | benign            |
| rs10875472 | NP_005284 | H | R | HR | benign            |
| rs10876209 | XP_377265 | D | G | DG | possibly damaging |
| rs10876360 | NP_775487 | A | T | AT | benign            |
| rs10878073 | NP_776173 | A | S | AS | benign            |
| rs10878074 | NP_776173 | V | A | VA | benign            |
| rs10878307 | XP_058513 | I | V | IV | benign            |
| rs10881994 | NP_689642 | A | T | AT | benign            |
| rs10882993 | NP_653189 | V | G | VG | possibly damaging |
| rs10883100 | NP_068600 | F | Y | FY | benign            |
| rs10883563 | NP_060591 | Y | S | YS | benign            |
| rs10883841 | NP_036361 | T | A | TA | benign            |
| rs10883859 | NP_008882 | S | A | SA | benign            |
| rs10885330 | XP_497249 | A | S | AS | benign            |
| rs10887063 | NP_996744 | L | F | LF | benign            |
| rs10887621 | NP_055860 | V | I | VI | benign            |
| rs10888228 | NP_543023 | A | T | AT | benign            |
| rs10888267 | XP_291438 | R | C | RC | probably damaging |
| rs10888338 | XP_291439 | A | V | AV | benign            |
| rs10888338 | XP_372826 | A | V | AV | benign            |
| rs10888359 | XP_291437 | V | F | VF | benign            |
| rs10888390 | NP_004070 | R | W | RW | benign            |
| rs10889205 | NP_036553 | E | D | ED | benign            |
| rs10890850 | NP_055880 | N | Y | NY | possibly damaging |
| rs10891314 | NP_001922 | D | N | DN | benign            |
| rs10891338 | NP_114144 | L | P | LP | probably damaging |
| rs10891692 | NP_689528 | G | R | GR | probably damaging |
| rs10893099 | XP_290501 | N | S | NS | benign            |
| rs10893172 | XP_370662 | S | C | SC | benign            |
| rs10893192 | XP_166767 | M | V | MV | probably damaging |

|            |           |   |   |    |                   |
|------------|-----------|---|---|----|-------------------|
| rs10893933 | NP_055176 | N | S | NS | benign            |
| rs10894006 | NP_997314 | K | N | KN | possibly damaging |
| rs10895391 | XP_370652 | A | V | AV | benign            |
| rs10895991 | NP_005177 | R | P | RP | benign            |
| rs10896309 | XP_166805 | M | T | MT | benign            |
| rs10896310 | XP_166805 | M | I | MI | benign            |
| rs10896380 | NP_002171 | V | I | VI | benign            |
| rs10896488 | XP_372400 | I | T | IT | possibly damaging |
| rs10896516 | XP_372403 | Y | H | YH | benign            |
| rs10896517 | XP_372403 | Y | C | YC | benign            |
| rs10896818 | NP_005829 | S | T | ST | benign            |
| rs10896818 | NP_964011 | S | T | ST | benign            |
| rs10897424 | NP_473449 | G | S | GS | benign            |
| rs10899257 | XP_495887 | P | S | PS | probably damaging |
| rs10900236 | XP_495809 | P | A | PA | benign            |
| rs10900400 | XP_372792 | D | G | DG | possibly damaging |
| rs10900416 | XP_496406 | R | C | RC | benign            |
| rs10900562 | NP_055750 | R | K | RK | benign            |
| rs10900571 | NP_055750 | V | I | VI | benign            |
| rs10901333 | NP_006050 | G | E | GE | possibly damaging |
| rs10901425 | NP_671724 | V | A | VA | benign            |
| rs10902170 | NP_932341 | R | G | RG | possibly damaging |
| rs10902171 | NP_932341 | D | H | DH | benign            |
| rs10902221 | NP_060964 | R | Q | RQ | benign            |
| rs10902221 | NP_665894 | R | Q | RQ | benign            |
| rs10902221 | NP_665893 | R | Q | RQ | benign            |
| rs10902269 | XP_290540 | N | T | NT | possibly damaging |
| rs10902270 | XP_290540 | H | L | HL | probably damaging |
| rs10902758 | NP_000274 | I | V | IV | benign            |
| rs10904481 | NP_444277 | R | G | RG | possibly damaging |
| rs10904516 | NP_059118 | R | K | RK | benign            |
| rs10907376 | NP_689823 | D | G | DG | possibly damaging |
| rs10907643 | XP_372094 | P | L | PL | probably damaging |
| rs10907870 | XP_497051 | Q | H | QH | possibly damaging |
| rs10908495 | NP_653181 | I | V | IV | benign            |
| rs10908496 | NP_653181 | P | S | PS | possibly damaging |
| rs10908722 | NP_036483 | I | M | IM | benign            |
| rs10908880 | XP_372110 | A | V | AV | benign            |
| rs10909295 | XP_495908 | H | Y | HY | benign            |
| rs10909782 | XP_497039 | L | F | LF | benign            |
| rs10909782 | XP_497029 | L | F | LF | benign            |
| rs10909820 | NP_997239 | A | S | AS | benign            |
| rs10910024 | NP_689705 | T | M | TM | benign            |
| rs10910120 | NP_079214 | T | A | TA | benign            |
| rs10910120 | NP_055616 | T | A | TA | benign            |
| rs10910439 | NP_005637 | A | T | AT | benign            |



|            |           |   |   |    |                   |
|------------|-----------|---|---|----|-------------------|
| rs10910779 | NP_077719 | S | P | SP | benign            |
| rs10910779 | NP_982283 | S | P | SP | possibly damaging |
| rs10911390 | NP_982279 | V | M | VM | benign            |
| rs10911391 | NP_982279 | P | S | PS | benign            |
| rs10912704 | XP_086409 | D | N | DN | possibly damaging |
| rs10912705 | XP_086409 | D | N | DN | benign            |
| rs10913933 | NP_002817 | G | R | GR | benign            |
| rs10914632 | NP_277039 | L | F | LF | benign            |
| rs10914692 | NP_932157 | P | S | PS | possibly damaging |
| rs10915230 | XP_033704 | R | L | RL | possibly damaging |
| rs10915231 | NP_005617 | S | I | SI | benign            |
| rs10916246 | NP_003386 | V | M | VM | benign            |
| rs10916668 | XP_375697 | A | T | AT | benign            |
| rs10916769 | NP_653224 | K | R | KR | benign            |
| rs10916883 | NP_003751 | G | S | GS | possibly damaging |
| rs10917051 | XP_377577 | N | T | NT | benign            |
| rs10917536 | NP_859070 | Q | K | QK | benign            |
| rs10919224 | NP_002146 | A | T | AT | benign            |
| rs10919225 | NP_002146 | N | S | NS | possibly damaging |
| rs10919226 | NP_002146 | D | N | DN | benign            |
| rs10919847 | XP_291577 | T | N | TN | possibly damaging |
| rs10920171 | NP_000290 | A | V | AV | benign            |
| rs10921310 | NP_057150 | R | W | RW | possibly damaging |
| rs10922938 | NP_958357 | A | V | AV | benign            |
| rs10925169 | XP_375853 | L | M | LM | benign            |
| rs10927851 | NP_060026 | F | S | FS | benign            |
| rs10927887 | NP_004061 | R | G | RG | possibly damaging |
| rs10929757 | NP_055483 | N | T | NT | benign            |
| rs10929757 | NP_149081 | N | T | NT | benign            |
| rs10929757 | NP_683701 | T | N | TN | benign            |
| rs10930046 | NP_071451 | H | R | HR | benign            |
| rs10931715 | NP_061720 | R | C | RC | possibly damaging |
| rs10932258 | NP_055855 | N | S | NS | benign            |
| rs10932816 | XP_051017 | M | T | MT | benign            |
| rs10933819 | NP_001618 | G | D | GD | possibly damaging |
| rs10935070 | NP_008958 | N | S | NS | benign            |
| rs10936600 | NP_699184 | L | I | LI | benign            |
| rs10937187 | NP_071432 | A | S | AS | benign            |
| rs10941112 | NP_055139 | G | D | GD | benign            |
| rs10941412 | NP_003990 | E | K | EK | benign            |
| rs10943299 | NP_001554 | R | W | RW | probably damaging |
| rs10943926 | NP_055833 | P | L | PL | probably damaging |
| rs10944433 | XP_072402 | K | E | KE | benign            |
| rs10945501 | NP_999627 | T | P | TP | possibly damaging |
| rs10946705 | XP_376472 | G | A | GA | possibly damaging |
| rs10946829 | NP_076923 | V | I | VI | benign            |

|            |           |   |   |    |                   |
|------------|-----------|---|---|----|-------------------|
| rs10946863 | XP_496798 | H | Q | HQ | probably damaging |
| rs10946864 | XP_496798 | V | L | VL | benign            |
| rs10947230 | NP_061978 | R | H | RH | possibly damaging |
| rs10947383 | NP_002112 | L | M | LM | benign            |
| rs10947623 | XP_371818 | V | I | VI | benign            |
| rs10947690 | NP_705691 | L | P | LP | possibly damaging |
| rs10947804 | NP_113648 | S | G | SG | benign            |
| rs10948072 | NP_055160 | T | I | TI | benign            |
| rs10949483 | NP_940988 | P | L | PL | probably damaging |
| rs10949885 | NP_699194 | K | E | KE | benign            |
| rs10949946 | NP_006515 | E | G | EG | benign            |
| rs10950797 | NP_689771 | R | H | RH | benign            |
| rs10950951 | XP_171158 | R | C | RC | benign            |
| rs10951154 | NP_705873 | H | R | HR | benign            |
| rs10951154 | NP_005513 | H | R | HR | probably damaging |
| rs10951942 | XP_059832 | A | S | AS | benign            |
| rs10952230 | XP_376720 | N | S | NS | benign            |
| rs10954696 | XP_168530 | V | I | VI | benign            |
| rs10957393 | NP_065094 | F | L | FL | benign            |
| rs10959293 | NP_997188 | I | F | IF | benign            |
| rs10961917 | NP_689787 | T | P | TP | benign            |
| rs10962043 | NP_150091 | S | F | SF | benign            |
| rs10962043 | NP_066967 | S | F | SF | possibly damaging |
| rs10962127 | NP_775821 | N | I | NI | probably damaging |
| rs10964136 | XP_294540 | A | V | AV | benign            |
| rs10964742 | NP_060264 | E | K | EK | benign            |
| rs10966026 | NP_004423 | Q | H | QH | probably damaging |
| rs10967589 | NP_004244 | A | G | AG | benign            |
| rs10970979 | NP_982272 | N | S | NS | benign            |
| rs10971523 | NP_631981 | P | S | PS | probably damaging |
| rs10971523 | NP_075068 | P | S | PS | probably damaging |
| rs10971808 | NP_060919 | S | L | SL | possibly damaging |
| rs10971808 | NP_065918 | S | L | SL | possibly damaging |
| rs10971809 | NP_060919 | P | L | PL | probably damaging |
| rs10971809 | NP_065918 | P | L | PL | probably damaging |
| rs10972026 | NP_919289 | S | C | SC | benign            |
| rs10972055 | XP_498309 | G | S | GS | benign            |
| rs10972056 | XP_498309 | S | R | SR | benign            |
| rs10972057 | XP_498309 | E | D | ED | benign            |
| rs10972276 | XP_048592 | R | P | RP | possibly damaging |
| rs10972787 | NP_001824 | R | L | RL | possibly damaging |
| rs10972787 | NP_009027 | R | Q | RQ | possibly damaging |
| rs10973368 | NP_071935 | V | I | VI | benign            |
| rs10973986 | NP_689842 | P | L | PL | probably damaging |
| rs10974150 | NP_387504 | G | V | GV | benign            |
| rs10974151 | NP_387504 | S | Y | SY | probably damaging |

|            |              |   |   |    |                   |
|------------|--------------|---|---|----|-------------------|
| rs10974657 | NP_060455    | G | R | GR | possibly damaging |
| rs10974946 | NP_004963    | E | K | EK | possibly damaging |
| rs10975269 | XP_039698    | R | T | RT | possibly damaging |
| rs10975674 | NP_000161    | R | C | RC | probably damaging |
| rs10975973 | NP_055876    | L | F | LF | benign            |
| rs10976432 | XP_373275    | H | Y | HY | benign            |
| rs10977171 | NP_569077    | Q | E | QE | benign            |
| rs10977171 | NP_569075    | Q | E | QE | possibly damaging |
| rs10977171 | NP_569076    | Q | E | QE | possibly damaging |
| rs10977171 | NP_002830    | Q | E | QE | possibly damaging |
| rs10978001 | NP_067063    | A | T | AT | benign            |
| rs10979599 | NP_003631    | T | N | TN | benign            |
| rs10979601 | NP_003631    | G | E | GE | benign            |
| rs10979858 | NP_002820    | T | A | TA | benign            |
| rs10980984 | NP_004116    | V | M | VM | benign            |
| rs10981506 | XP_376902    | G | D | GD | benign            |
| rs10981558 | XP_372133    | L | H | LH | possibly damaging |
| rs10983107 | NP_002572    | S | N | SN | benign            |
| rs10983315 | NP_000371    | V | I | VI | benign            |
| rs10984919 | NP_060719    | G | R | GR | benign            |
| rs10985042 | XP_378080    | S | G | SG | benign            |
| rs10985630 | NP_000953    | A | V | AV | benign            |
| rs10985704 | XP_071150    | T | P | TP | possibly damaging |
| rs10985760 | XP_373315    | I | T | IT | possibly damaging |
| rs10985765 | NP_005449    | T | A | TA | benign            |
| rs10987632 | NP_055395    | S | I | SI | possibly damaging |
| rs10987769 | NP_078918    | V | E | VE | possibly damaging |
| rs10987947 | NP_004399    | R | S | RS | probably damaging |
| rs10988518 | NP_055321    | A | T | AT | benign            |
| rs10988532 | NP_001846    | T | M | TM | benign            |
| rs10989492 | NP_932094    | R | K | RK | benign            |
| rs10989492 | NP_003443    | R | K | RK | benign            |
| rs10989495 | NP_000026    | I | N | IN | probably damaging |
| rs10989563 | NP_597702    | D | N | DN | benign            |
| rs10989589 | NP_597702    | G | R | GR | possibly damaging |
| rs10989591 | NP_597702    | V | M | VM | benign            |
| rs10991292 | XP_071098    | V | A | VA | benign            |
| rs10991304 | XP_071096    | S | T | ST | benign            |
| rs10991326 | XP_373308    | L | H | LH | probably damaging |
| rs10992251 | XP_372128    | C | S | CS | benign            |
| rs10993152 | NP_919301    | R | S | RS | possibly damaging |
| rs10993163 | XP_030729    | P | S | PS | possibly damaging |
| rs10994189 | NP_001140    | I | M | IM | benign            |
| rs10994189 | NP_066267    | I | M | IM | benign            |
| rs10995569 | NP_001001330 | Q | R | QR | benign            |
| rs10997754 | NP_037398    | D | H | DH | benign            |

|            |           |   |   |    |                   |
|------------|-----------|---|---|----|-------------------|
| rs10997975 | NP_115967 | N | S | NS | benign            |
| rs10998268 | XP_495828 | R | C | RC | possibly damaging |
| rs10998484 | NP_076950 | P | L | PL | probably damaging |
| rs10999147 | NP_116186 | M | T | MT | probably damaging |
| rs10999334 | NP_060525 | E | K | EK | benign            |
| rs10999406 | XP_166125 | G | R | GR | benign            |
| rs10999503 | NP_542453 | G | R | GR | possibly damaging |
| rs10999503 | NP_631894 | G | R | GR | possibly damaging |
| rs10999516 | NP_542453 | S | N | SN | benign            |
| rs10999516 | NP_631894 | S | N | SN | benign            |
| rs10999544 | XP_291745 | C | S | CS | probably damaging |
| rs10999947 | NP_071407 | S | N | SN | benign            |
| rs11001247 | NP_036462 | D | E | DE | benign            |
| rs11001248 | NP_036462 | E | D | ED | benign            |
| rs11001408 | NP_006249 | L | M | LM | benign            |
| rs11001564 | NP_036374 | E | K | EK | benign            |
| rs11004439 | NP_149045 | S | A | SA | benign            |
| rs11006128 | NP_003192 | S | T | ST | benign            |
| rs11006622 | XP_290463 | M | T | MT | benign            |
| rs11006655 | NP_919274 | D | E | DE | benign            |
| rs11007110 | XP_377109 | D | V | DV | probably damaging |
| rs11007612 | NP_003165 | S | P | SP | benign            |
| rs11007612 | NP_068506 | S | P | SP | benign            |
| rs11011379 | NP_066383 | K | E | KE | benign            |
| rs11011935 | NP_689938 | F | L | FL | benign            |
| rs11012351 | NP_006384 | Q | K | QK | benign            |
| rs11013233 | NP_775104 | S | P | SP | possibly damaging |
| rs11014178 | NP_065875 | S | F | SF | possibly damaging |
| rs11015273 | NP_005461 | S | R | SR | possibly damaging |
| rs11015543 | NP_055078 | Q | H | QH | possibly damaging |
| rs11015543 | NP_647474 | Q | H | QH | possibly damaging |
| rs11015543 | NP_647473 | Q | H | QH | possibly damaging |
| rs11015572 | NP_055078 | V | I | VI | benign            |
| rs11015572 | NP_647474 | V | I | VI | benign            |
| rs11015572 | NP_647473 | V | I | VI | benign            |
| rs11015859 | NP_067075 | A | T | AT | benign            |
| rs11016071 | NP_002408 | Q | R | QR | benign            |
| rs11016072 | NP_002408 | R | H | RH | benign            |
| rs11016073 | NP_002408 | I | T | IT | benign            |
| rs11016074 | NP_002408 | T | S | TS | benign            |
| rs11016076 | NP_002408 | E | D | ED | benign            |
| rs11018744 | XP_372423 | A | G | AG | benign            |
| rs11018769 | XP_061880 | C | S | CS | benign            |
| rs11018879 | NP_005458 | V | I | VI | benign            |
| rs11019909 | XP_497314 | E | G | EG | possibly damaging |
| rs11019910 | XP_497314 | E | K | EK | benign            |

|            |           |   |   |    |                   |
|------------|-----------|---|---|----|-------------------|
| rs11020845 | NP_689644 | Q | L | QL | benign            |
| rs11020968 | NP_570899 | P | L | PL | probably damaging |
| rs11021068 | NP_653266 | V | I | VI | benign            |
| rs11021069 | NP_653266 | I | T | IT | benign            |
| rs11022079 | NP_060414 | V | G | VG | possibly damaging |
| rs11022089 | NP_060414 | A | G | AG | benign            |
| rs11022802 | NP_115696 | R | K | RK | benign            |
| rs11023230 | XP_497267 | Q | L | QL | benign            |
| rs11023804 | NP_201583 | T | I | TI | possibly damaging |
| rs11024269 | XP_370615 | A | E | AE | benign            |
| rs11024333 | XP_291816 | R | Q | RQ | benign            |
| rs11024341 | XP_291816 | A | V | AV | benign            |
| rs11024532 | NP_473373 | A | V | AV | benign            |
| rs11024773 | NP_116170 | H | R | HR | probably damaging |
| rs11024885 | NP_671732 | I | V | IV | benign            |
| rs11024970 | NP_473371 | N | H | NH | possibly damaging |
| rs11025585 | NP_005779 | S | C | SC | possibly damaging |
| rs11031390 | XP_372343 | S | R | SR | benign            |
| rs11031961 | XP_089858 | T | I | TI | probably damaging |
| rs11032229 | NP_005725 | S | N | SN | benign            |
| rs11032296 | XP_061676 | R | C | RC | benign            |
| rs11033139 | XP_372349 | L | P | LP | benign            |
| rs11033639 | NP_079117 | P | S | PS | possibly damaging |
| rs11033793 | XP_171424 | H | R | HR | benign            |
| rs11033800 | XP_171424 | R | M | RM | probably damaging |
| rs11033801 | XP_171424 | F | S | FS | benign            |
| rs11034596 | XP_061619 | E | K | EK | benign            |
| rs11035396 | XP_061610 | R | W | RW | benign            |
| rs11036212 | XP_210181 | L | F | LF | benign            |
| rs11036815 | NP_149420 | P | S | PS | probably damaging |
| rs11037443 | XP_372356 | I | M | IM | benign            |
| rs11037445 | XP_372356 | V | L | VL | possibly damaging |
| rs11037502 | XP_372357 | R | H | RH | probably damaging |
| rs11037682 | NP_057226 | M | T | MT | probably damaging |
| rs11037758 | XP_372359 | R | W | RW | probably damaging |
| rs11037840 | XP_372375 | V | M | VM | benign            |
| rs11038628 | NP_149023 | G | D | GD | benign            |
| rs11038628 | NP_149083 | G | D | GD | benign            |
| rs11038628 | NP_149084 | G | D | GD | benign            |
| rs11038713 | NP_689525 | R | W | RW | possibly damaging |
| rs11038988 | NP_055571 | Y | C | YC | probably damaging |
| rs11039036 | XP_372364 | G | W | GW | possibly damaging |
| rs11039302 | NP_060565 | D | N | DN | benign            |
| rs11039302 | NP_057590 | D | N | DN | benign            |
| rs11039323 | NP_055157 | D | G | DG | possibly damaging |
| rs11039531 | NP_002834 | A | T | AT | benign            |

|            |              |   |   |    |                   |
|------------|--------------|---|---|----|-------------------|
| rs11039554 | NP_002834    | I | T | IT | benign            |
| rs11040127 | XP_372378    | S | N | SN | benign            |
| rs11040249 | XP_062269    | I | V | IV | benign            |
| rs11040260 | XP_497280    | R | C | RC | probably damaging |
| rs11040592 | XP_497281    | W | R | WR | probably damaging |
| rs11040779 | XP_171528    | V | I | VI | benign            |
| rs11040799 | XP_062263    | L | Q | LQ | possibly damaging |
| rs11040808 | NP_115503    | Q | H | QH | benign            |
| rs11040904 | NP_775860    | F | L | FL | benign            |
| rs11040934 | NP_056139    | A | P | AP | benign            |
| rs11040980 | XP_495863    | E | K | EK | benign            |
| rs11040982 | XP_495863    | K | R | KR | benign            |
| rs11040983 | XP_495863    | S | N | SN | benign            |
| rs11040984 | XP_495863    | Q | R | QR | benign            |
| rs11040985 | XP_495863    | C | Y | CY | probably damaging |
| rs11041107 | NP_037382    | N | S | NS | benign            |
| rs11041108 | NP_037382    | M | V | MV | benign            |
| rs11041115 | NP_037382    | S | F | SF | benign            |
| rs11041151 | NP_789792    | L | F | LF | benign            |
| rs11041525 | NP_001001336 | E | A | EA | benign            |
| rs11041525 | NP_057313    | E | A | EA | benign            |
| rs11042015 | XP_084529    | Q | K | QK | benign            |
| rs11042021 | XP_084529    | V | A | VA | benign            |
| rs11042022 | XP_084529    | H | R | HR | probably damaging |
| rs11042023 | XP_084529    | H | R | HR | possibly damaging |
| rs11042047 | NP_005409    | S | F | SF | possibly damaging |
| rs11042047 | NP_998783    | S | F | SF | possibly damaging |
| rs11042047 | NP_631896    | S | F | SF | possibly damaging |
| rs11042127 | NP_065694    | V | L | VL | benign            |
| rs11042340 | NP_006382    | T | N | TN | possibly damaging |
| rs11042352 | NP_006382    | L | F | LF | benign            |
| rs11042836 | NP_000471    | R | W | RW | possibly damaging |
| rs11043758 | XP_495906    | R | H | RH | possibly damaging |
| rs11045676 | XP_292093    | F | Y | FY | benign            |
| rs11045681 | XP_292093    | Y | C | YC | probably damaging |
| rs11045689 | XP_292093    | A | T | AT | benign            |
| rs11045699 | XP_292093    | F | L | FL | probably damaging |
| rs11045819 | NP_006437    | P | T | PT | possibly damaging |
| rs11045852 | NP_006437    | I | V | IV | benign            |
| rs11045853 | NP_006437    | R | Q | RQ | possibly damaging |
| rs11046282 | NP_061156    | K | E | KE | benign            |
| rs11049005 | NP_064568    | A | V | AV | benign            |
| rs11049488 | NP_060788    | T | A | TA | benign            |
| rs11049614 | NP_060788    | M | V | MV | benign            |
| rs11051266 | XP_495917    | S | L | SL | possibly damaging |
| rs11051274 | XP_495917    | N | S | NS | benign            |

|            |           |   |   |    |                   |
|------------|-----------|---|---|----|-------------------|
| rs11051523 | NP_776163 | L | V | LV | benign            |
| rs11051567 | XP_084845 | A | T | AT | benign            |
| rs11053646 | NP_002534 | K | N | KN | benign            |
| rs11053796 | NP_002251 | H | R | HR | probably damaging |
| rs11054042 | NP_076406 | L | V | LV | benign            |
| rs11054043 | NP_076406 | K | Q | KQ | benign            |
| rs11054044 | NP_076406 | S | T | ST | benign            |
| rs11054133 | NP_795371 | S | N | SN | benign            |
| rs11055067 | NP_110444 | L | F | LF | benign            |
| rs11055164 | NP_061124 | A | D | AD | benign            |
| rs11055254 | NP_055533 | Q | H | QH | possibly damaging |
| rs11056560 | NP_109596 | G | C | GC | possibly damaging |
| rs11056560 | NP_109595 | G | C | GC | possibly damaging |
| rs11056560 | NP_109592 | G | C | GC | probably damaging |
| rs11056560 | NP_002839 | G | C | GC | probably damaging |
| rs11057306 | NP_065987 | N | S | NS | benign            |
| rs11057401 | NP_079416 | S | C | SC | benign            |
| rs11057808 | NP_937883 | T | S | TS | benign            |
| rs11057808 | NP_002947 | T | S | TS | benign            |
| rs11057939 | NP_116045 | R | Q | RQ | benign            |
| rs11060094 | NP_689972 | K | Q | KQ | benign            |
| rs11060869 | XP_044334 | D | N | DN | benign            |
| rs11061318 | NP_942122 | S | L | SL | benign            |
| rs11061915 | NP_003035 | V | I | VI | benign            |
| rs11063113 | NP_065689 | L | V | LV | benign            |
| rs11063156 | NP_066276 | L | M | LM | benign            |
| rs11063218 | NP_006470 | P | A | PA | probably damaging |
| rs11063266 | NP_006413 | T | S | TS | benign            |
| rs11063529 | NP_775864 | R | Q | RQ | benign            |
| rs11063570 | NP_775864 | R | Q | RQ | benign            |
| rs11063987 | NP_000543 | N | S | NS | benign            |
| rs11063988 | NP_000543 | I | V | IV | benign            |
| rs11064002 | NP_000543 | F | S | FS | probably damaging |
| rs11064012 | NP_000543 | P | L | PL | probably damaging |
| rs11064419 | NP_000607 | F | S | FS | probably damaging |
| rs11064421 | NP_000607 | I | T | IT | possibly damaging |
| rs11064463 | NP_001966 | E | D | ED | benign            |
| rs11065998 | NP_006759 | D | Y | DY | probably damaging |
| rs11066013 | NP_079523 | L | V | LV | benign            |
| rs11066214 | NP_776174 | P | L | PL | probably damaging |
| rs11068230 | NP_699179 | R | G | RG | possibly damaging |
| rs11068298 | NP_671737 | A | T | AT | benign            |
| rs11068298 | NP_067638 | A | T | AT | benign            |
| rs11068997 | NP_476510 | A | V | AV | benign            |
| rs11070136 | NP_055749 | P | S | PS | probably damaging |
| rs11070136 | NP_945319 | P | S | PS | probably damaging |

|            |           |   |   |    |                   |
|------------|-----------|---|---|----|-------------------|
| rs11071896 | NP_060445 | S | G | SG | benign            |
| rs11072170 | XP_375185 | G | E | GE | possibly damaging |
| rs11072476 | NP_065902 | P | S | PS | possibly damaging |
| rs11072532 | NP_056307 | D | G | DG | possibly damaging |
| rs11072735 | NP_055977 | A | V | AV | benign            |
| rs11073619 | NP_116245 | R | H | RH | benign            |
| rs11073922 | NP_057729 | L | F | LF | benign            |
| rs11073964 | NP_061138 | S | G | SG | benign            |
| rs11074359 | NP_057222 | T | M | TM | possibly damaging |
| rs11074362 | XP_091331 | P | S | PS | possibly damaging |
| rs11074471 | NP_060206 | E | D | ED | benign            |
| rs11074656 | NP_443176 | V | A | VA | benign            |
| rs11076126 | NP_659461 | E | K | EK | benign            |
| rs11076256 | NP_002071 | G | S | GS | benign            |
| rs11077733 | NP_000990 | K | E | KE | possibly damaging |
| rs11078738 | NP_036525 | L | P | LP | possibly damaging |
| rs11078993 | NP_002269 | R | Q | RQ | possibly damaging |
| rs11079339 | NP_000493 | I | M | IM | benign            |
| rs11079346 | NP_004749 | H | R | HR | benign            |
| rs11080134 | NP_079133 | E | G | EG | possibly damaging |
| rs11081992 | NP_064565 | A | D | AD | benign            |
| rs11082414 | NP_056374 | V | L | VL | benign            |
| rs11083543 | NP_003881 | V | L | VL | benign            |
| rs11083711 | NP_942147 | R | Q | RQ | benign            |
| rs11083750 | NP_000032 | P | R | PR | probably damaging |
| rs11083761 | NP_940880 | R | C | RC | possibly damaging |
| rs11084161 | XP_496320 | T | N | TN | benign            |
| rs11084162 | XP_496320 | I | V | IV | benign            |
| rs11084163 | XP_496320 | T | A | TA | benign            |
| rs11084210 | XP_064856 | S | L | SL | probably damaging |
| rs11084810 | NP_542167 | L | M | LM | benign            |
| rs11084810 | NP_002352 | L | M | LM | benign            |
| rs11084897 | XP_059051 | L | V | LV | benign            |
| rs11085147 | NP_004784 | R | Q | RQ | benign            |
| rs11085198 | NP_000055 | L | P | LP | possibly damaging |
| rs11085438 | XP_496300 | C | R | CR | probably damaging |
| rs11085439 | XP_496300 | R | K | RK | benign            |
| rs11085447 | XP_497613 | S | L | SL | probably damaging |
| rs11085808 | NP_110451 | G | R | GR | probably damaging |
| rs11085809 | NP_110451 | M | T | MT | probably damaging |
| rs11086065 | NP_689576 | R | Q | RQ | benign            |
| rs11086690 | NP_817089 | R | G | RG | benign            |
| rs11086998 | NP_001241 | P | A | PA | benign            |
| rs11088262 | NP_001688 | K | R | KR | benign            |
| rs11088674 | NP_002763 | N | H | NH | benign            |
| rs11089942 | NP_000958 | P | L | PL | probably damaging |



|            |           |   |   |    |                   |
|------------|-----------|---|---|----|-------------------|
| rs11089979 | NP_009059 | S | L | SL | benign            |
| rs11089991 | NP_000017 | K | M | KM | benign            |
| rs11090865 | NP_060476 | A | S | AS | benign            |
| rs11092252 | XP_497133 | H | R | HR | benign            |
| rs11094772 | XP_372199 | S | F | SF | possibly damaging |
| rs11095722 | NP_848565 | G | D | GD | possibly damaging |
| rs11096955 | NP_112218 | I | L | IL | benign            |
| rs11096957 | NP_112218 | N | H | NH | benign            |
| rs11096964 | NP_612398 | R | G | RG | probably damaging |
| rs11098044 | NP_000195 | A | T | AT | benign            |
| rs11098261 | NP_003351 | M | I | MI | possibly damaging |
| rs11098513 | XP_114415 | V | A | VA | possibly damaging |
| rs11098523 | XP_376342 | I | S | IS | possibly damaging |
| rs11098943 | NP_689991 | G | R | GR | benign            |
| rs11099592 | NP_006656 | R | K | RK | benign            |
| rs11101143 | NP_736609 | Q | E | QE | benign            |
| rs11101224 | NP_060715 | T | M | TM | benign            |
| rs11101272 | NP_689641 | A | T | AT | benign            |
| rs11101618 | NP_689856 | A | S | AS | benign            |
| rs11101618 | NP_208383 | A | S | AS | benign            |
| rs11101619 | NP_689856 | S | G | SG | benign            |
| rs11101619 | NP_208383 | S | G | SG | benign            |
| rs11101620 | NP_689856 | R | Q | RQ | benign            |
| rs11101620 | NP_208383 | R | Q | RQ | benign            |
| rs11101675 | NP_001100 | G | R | GR | benign            |
| rs11101677 | NP_006650 | A | T | AT | benign            |
| rs11101682 | NP_006650 | I | T | IT | benign            |
| rs11101822 | NP_963858 | P | A | PA | possibly damaging |
| rs11101822 | NP_570140 | P | A | PA | possibly damaging |
| rs11101958 | XP_104657 | A | T | AT | benign            |
| rs11102001 | NP_078802 | P | S | PS | possibly damaging |
| rs11102001 | NP_573444 | P | S | PS | possibly damaging |
| rs11102001 | NP_620641 | P | S | PS | possibly damaging |
| rs11102529 | XP_060943 | T | R | TR | possibly damaging |
| rs11102700 | NP_073747 | S | F | SF | benign            |
| rs11104703 | NP_689802 | R | H | RH | benign            |
| rs11104729 | XP_374989 | I | V | IV | benign            |
| rs11107500 | NP_005752 | E | K | EK | benign            |
| rs11109474 | NP_078961 | L | F | LF | benign            |
| rs11109968 | NP_699195 | R | G | RG | probably damaging |
| rs11109969 | NP_699195 | M | V | MV | benign            |
| rs11110226 | XP_045423 | I | M | IM | benign            |
| rs11114416 | NP_775862 | L | F | LF | benign            |
| rs11115344 | NP_689801 | E | K | EK | benign            |
| rs11118075 | NP_057136 | K | N | KN | benign            |
| rs11118983 | NP_079455 | Q | H | QH | possibly damaging |

|            |           |   |   |    |                   |
|------------|-----------|---|---|----|-------------------|
| rs11119014 | NP_079455 | Q | R | QR | benign            |
| rs11119315 | NP_065172 | V | I | VI | benign            |
| rs11120047 | NP_054772 | A | P | AP | benign            |
| rs11120301 | NP_064582 | I | M | IM | benign            |
| rs11121804 | NP_940947 | F | L | FL | benign            |
| rs11121996 | XP_497650 | D | Y | DY | probably damaging |
| rs11122050 | XP_496343 | S | N | SN | benign            |
| rs11122050 | XP_496345 | S | N | SN | benign            |
| rs11122073 | XP_497652 | G | D | GD | benign            |
| rs11122075 | XP_497652 | E | K | EK | benign            |
| rs11122076 | XP_497652 | Q | H | QH | probably damaging |
| rs11122266 | NP_055051 | V | I | VI | benign            |
| rs11122770 | XP_374318 | R | M | RM | benign            |
| rs11123868 | NP_775918 | S | G | SG | benign            |
| rs11124638 | XP_165448 | P | L | PL | benign            |
| rs11124652 | NP_659432 | H | Y | HY | benign            |
| rs11124652 | NP_945314 | H | Y | HY | benign            |
| rs11124652 | NP_663621 | H | Y | HY | possibly damaging |
| rs11126472 | NP_115557 | R | H | RH | possibly damaging |
| rs11126879 | XP_372923 | R | Q | RQ | benign            |
| rs11128668 | XP_376207 | C | Y | CY | probably damaging |
| rs11130097 | NP_003203 | V | A | VA | benign            |
| rs11130191 | NP_115692 | S | P | SP | benign            |
| rs11130296 | XP_496643 | R | Q | RQ | possibly damaging |
| rs11132306 | NP_689988 | S | F | SF | benign            |
| rs11134804 | NP_150377 | Q | E | QE | benign            |
| rs11135721 | XP_114618 | L | R | LR | benign            |
| rs11136334 | NP_958786 | R | Q | RQ | benign            |
| rs11136334 | NP_958785 | R | Q | RQ | benign            |
| rs11136334 | NP_958784 | R | Q | RQ | benign            |
| rs11136334 | NP_958783 | R | Q | RQ | benign            |
| rs11136334 | NP_958781 | R | Q | RQ | benign            |
| rs11136334 | NP_958780 | R | Q | RQ | benign            |
| rs11136334 | NP_000436 | R | Q | RQ | benign            |
| rs11136336 | NP_958786 | A | V | AV | benign            |
| rs11136336 | NP_958785 | A | V | AV | benign            |
| rs11136336 | NP_958784 | A | V | AV | benign            |
| rs11136336 | NP_958783 | A | V | AV | benign            |
| rs11136336 | NP_958782 | A | V | AV | benign            |
| rs11136336 | NP_958781 | A | V | AV | benign            |
| rs11136336 | NP_958780 | A | V | AV | benign            |
| rs11136336 | NP_000436 | A | V | AV | benign            |
| rs11136343 | XP_378197 | L | P | LP | benign            |
| rs11136344 | XP_378197 | I | V | IV | benign            |
| rs11137198 | NP_079033 | A | T | AT | benign            |
| rs11137342 | NP_000709 | T | A | TA | benign            |

|            |           |   |   |    |                   |
|------------|-----------|---|---|----|-------------------|
| rs11137410 | NP_689499 | R | Q | RQ | benign            |
| rs11138343 | NP_008936 | D | N | DN | possibly damaging |
| rs11138395 | NP_004807 | E | K | EK | benign            |
| rs11138396 | NP_004807 | R | K | RK | benign            |
| rs11140241 | NP_079487 | H | R | HR | probably damaging |
| rs11140503 | NP_071410 | P | Q | PQ | probably damaging |
| rs11141102 | XP_372121 | K | E | KE | benign            |
| rs11141355 | XP_497064 | V | A | VA | benign            |
| rs11141356 | XP_497064 | R | H | RH | benign            |
| rs11142016 | NP_849150 | W | G | WG | probably damaging |
| rs11142017 | NP_849150 | H | R | HR | benign            |
| rs11142365 | NP_055925 | H | R | HR | possibly damaging |
| rs11142969 | NP_037522 | E | K | EK | benign            |
| rs11143384 | NP_619636 | R | W | RW | benign            |
| rs11145014 | XP_041018 | E | K | EK | benign            |
| rs11145016 | XP_041018 | V | I | VI | benign            |
| rs11145017 | XP_041018 | M | I | MI | benign            |
| rs11145757 | XP_088459 | E | D | ED | benign            |
| rs11146581 | XP_495853 | A | T | AT | benign            |
| rs11146955 | XP_495939 | L | P | LP | possibly damaging |
| rs11147241 | XP_495940 | M | T | MT | possibly damaging |
| rs11147258 | NP_056209 | D | N | DN | benign            |
| rs11147259 | NP_056209 | Q | R | QR | benign            |
| rs11147260 | NP_056209 | S | R | SR | benign            |
| rs11149631 | NP_631913 | G | R | GR | possibly damaging |
| rs11150370 | NP_877417 | A | P | AP | probably damaging |
| rs11150805 | XP_375500 | R | W | RW | possibly damaging |
| rs11150843 | NP_000143 | H | R | HR | benign            |
| rs11152067 | NP_056092 | T | P | TP | possibly damaging |
| rs11155191 | XP_496827 | D | E | DE | benign            |
| rs11155242 | NP_065188 | K | Q | KQ | benign            |
| rs11155297 | NP_114409 | A | E | AE | possibly damaging |
| rs11155687 | NP_005380 | V | I | VI | benign            |
| rs11156587 | XP_373378 | P | A | PA | possibly damaging |
| rs11156878 | XP_375074 | N | S | NS | benign            |
| rs11157729 | NP_078834 | A | D | AD | possibly damaging |
| rs11158685 | XP_375087 | H | R | HR | possibly damaging |
| rs11160825 | XP_290629 | D | N | DN | benign            |
| rs11161065 | NP_002733 | R | K | RK | possibly damaging |
| rs11164112 | NP_653306 | S | G | SG | benign            |
| rs11165091 | NP_004806 | P | L | PL | probably damaging |
| rs11165298 | NP_659425 | V | M | VM | benign            |
| rs11165631 | XP_496374 | R | C | RC | benign            |
| rs11165632 | XP_496374 | M | I | MI | probably damaging |
| rs11165778 | XP_371267 | S | P | SP | benign            |
| rs11166332 | XP_034086 | Q | R | QR | benign            |

|            |           |   |   |    |                   |
|------------|-----------|---|---|----|-------------------|
| rs11167600 | NP_113683 | V | L | VL | benign            |
| rs11167600 | NP_113684 | V | L | VL | benign            |
| rs11167600 | NP_061728 | V | L | VL | benign            |
| rs11167605 | NP_113688 | E | D | ED | possibly damaging |
| rs11167605 | NP_061730 | E | D | ED | possibly damaging |
| rs11167744 | NP_114480 | F | L | FL | benign            |
| rs11167744 | NP_114481 | F | L | FL | benign            |
| rs11167744 | NP_061737 | F | L | FL | benign            |
| rs11168196 | NP_078880 | D | Y | DY | possibly damaging |
| rs11168459 | XP_062553 | Y | H | YH | benign            |
| rs11169226 | NP_000477 | L | F | LF | benign            |
| rs11169818 | NP_009141 | A | T | AT | benign            |
| rs11170126 | NP_005546 | P | L | PL | probably damaging |
| rs11170164 | NP_000415 | G | E | GE | possibly damaging |
| rs11170176 | NP_778223 | L | Q | LQ | benign            |
| rs11170177 | NP_778223 | N | K | NK | probably damaging |
| rs11170183 | NP_542785 | R | L | RL | probably damaging |
| rs11170187 | NP_542785 | N | D | ND | benign            |
| rs11170203 | NP_778238 | G | R | GR | possibly damaging |
| rs11170271 | NP_056932 | A | T | AT | benign            |
| rs11170289 | NP_775487 | R | H | RH | benign            |
| rs11170343 | NP_954657 | N | D | ND | possibly damaging |
| rs11170343 | NP_000215 | N | D | ND | possibly damaging |
| rs11170389 | NP_056134 | S | T | ST | benign            |
| rs11170389 | NP_736610 | S | T | ST | benign            |
| rs11170389 | NP_938072 | S | T | ST | benign            |
| rs11170883 | NP_065103 | G | D | GD | possibly damaging |
| rs11171453 | XP_208080 | N | S | NS | benign            |
| rs11171717 | NP_060111 | S | Y | SY | benign            |
| rs11171743 | NP_001973 | G | S | GS | benign            |
| rs11171924 | NP_006592 | D | N | DN | possibly damaging |
| rs11172102 | NP_003144 | D | N | DN | benign            |
| rs11172123 | NP_002323 | T | A | TA | benign            |
| rs11172308 | NP_006803 | K | N | KN | benign            |
| rs11172329 | NP_996797 | L | F | LF | benign            |
| rs11174549 | XP_051091 | I | V | IV | benign            |
| rs11175176 | XP_292012 | Q | H | QH | probably damaging |
| rs11175387 | NP_009166 | Q | H | QH | benign            |
| rs11177386 | NP_002383 | V | I | VI | benign            |
| rs11177386 | NP_006872 | V | I | VI | benign            |
| rs11178192 | NP_055330 | A | T | AT | benign            |
| rs11181011 | NP_037509 | Y | C | YC | probably damaging |
| rs11181469 | NP_958846 | R | K | RK | benign            |
| rs11181469 | NP_958847 | R | K | RK | benign            |
| rs11181469 | NP_958848 | R | K | RK | benign            |
| rs11181469 | NP_958923 | R | K | RK | benign            |

|            |           |   |   |    |                   |
|------------|-----------|---|---|----|-------------------|
| rs11183450 | NP_061849 | N | K | NK | benign            |
| rs11183610 | NP_060488 | T | M | TM | benign            |
| rs11185863 | NP_057279 | E | Q | EQ | benign            |
| rs11186740 | NP_689642 | K | R | KR | benign            |
| rs11187225 | NP_061926 | L | V | LV | benign            |
| rs11187265 | NP_899230 | R | Q | RQ | benign            |
| rs11187393 | NP_579899 | R | C | RC | possibly damaging |
| rs11187393 | NP_038479 | R | C | RC | possibly damaging |
| rs11187583 | NP_660289 | S | F | SF | possibly damaging |
| rs11187892 | NP_071896 | R | I | RI | probably damaging |
| rs11187895 | NP_071896 | P | R | PR | benign            |
| rs11188667 | NP_037446 | F | L | FL | possibly damaging |
| rs11188980 | NP_056467 | N | S | NS | benign            |
| rs11189513 | NP_055287 | H | R | HR | possibly damaging |
| rs11189524 | NP_115587 | W | G | WG | probably damaging |
| rs11189525 | NP_115587 | P | T | PT | possibly damaging |
| rs11189596 | NP_116098 | Q | H | QH | possibly damaging |
| rs11189601 | NP_872577 | E | K | EK | benign            |
| rs11189601 | NP_000186 | E | K | EK | benign            |
| rs11190245 | NP_065087 | V | A | VA | benign            |
| rs11190305 | NP_056036 | C | W | CW | benign            |
| rs11190812 | NP_112191 | G | D | GD | possibly damaging |
| rs11191082 | NP_071322 | R | K | RK | benign            |
| rs11191224 | NP_004732 | G | V | GV | possibly damaging |
| rs11191274 | NP_004184 | G | S | GS | benign            |
| rs11191634 | NP_116116 | S | F | SF | possibly damaging |
| rs11191737 | NP_004201 | S | G | SG | benign            |
| rs11191893 | NP_055535 | D | N | DN | benign            |
| rs11191917 | NP_000485 | R | Q | RQ | benign            |
| rs11191917 | NP_570134 | R | Q | RQ | benign            |
| rs11192036 | XP_089747 | S | T | ST | benign            |
| rs11196382 | NP_004123 | S | T | ST | benign            |
| rs11196389 | NP_006166 | L | P | LP | benign            |
| rs11196389 | NP_932326 | L | P | LP | benign            |
| rs11196400 | NP_006166 | D | N | DN | benign            |
| rs11196400 | NP_932326 | D | N | DN | benign            |
| rs11196530 | NP_055696 | I | F | IF | benign            |
| rs11196689 | NP_115939 | G | R | GR | probably damaging |
| rs11197738 | NP_000927 | V | I | VI | benign            |
| rs11197744 | NP_006220 | N | D | ND | possibly damaging |
| rs11199082 | NP_938145 | L | M | LM | benign            |
| rs11199082 | NP_055752 | L | M | LM | benign            |
| rs11199127 | NP_009121 | R | L | RL | probably damaging |
| rs11200385 | NP_996744 | V | I | VI | benign            |
| rs11200387 | NP_996744 | A | T | AT | benign            |
| rs11200483 | NP_996742 | E | D | ED | benign            |

|            |           |   |   |    |                   |
|------------|-----------|---|---|----|-------------------|
| rs11200483 | NP_996743 | E | D | ED | benign            |
| rs11200483 | NP_996744 | E | D | ED | benign            |
| rs11200483 | NP_008928 | E | D | ED | benign            |
| rs11200524 | NP_653188 | R | Q | RQ | benign            |
| rs11200925 | XP_291697 | L | F | LF | benign            |
| rs11200927 | XP_291697 | K | N | KN | benign            |
| rs11200933 | NP_056428 | L | M | LM | benign            |
| rs11201058 | NP_061872 | C | Y | CY | benign            |
| rs11202271 | NP_079032 | L | M | LM | benign            |
| rs11203289 | NP_002991 | A | G | AG | benign            |
| rs11203335 | NP_037490 | R | H | RH | benign            |
| rs11203366 | NP_036519 | S | G | SG | benign            |
| rs11203367 | NP_036519 | A | V | AV | benign            |
| rs11203494 | NP_079043 | N | D | ND | benign            |
| rs11203495 | NP_079043 | Q | H | QH | benign            |
| rs11204213 | NP_002891 | V | M | VM | benign            |
| rs11204362 | XP_496197 | Y | H | YH | benign            |
| rs11204523 | NP_056246 | S | W | SW | benign            |
| rs11204545 | XP_291438 | M | K | MK | probably damaging |
| rs11204546 | XP_291438 | M | T | MT | possibly damaging |
| rs11204563 | XP_291439 | G | S | GS | benign            |
| rs11204564 | XP_291439 | W | R | WR | benign            |
| rs11204625 | XP_060305 | K | N | KN | benign            |
| rs11204774 | NP_653219 | V | I | VI | benign            |
| rs11204871 | NP_112180 | E | K | EK | benign            |
| rs11204936 | XP_373868 | T | M | TM | benign            |
| rs11204937 | XP_373868 | R | H | RH | benign            |
| rs11204978 | XP_048104 | S | Y | SY | possibly damaging |
| rs11205137 | NP_005538 | Q | K | QK | benign            |
| rs11205303 | NP_870988 | M | V | MV | benign            |
| rs11205303 | NP_006688 | M | V | MV | benign            |
| rs11205321 | XP_497712 | L | P | LP | probably damaging |
| rs11206394 | NP_788954 | G | A | GA | benign            |
| rs11206407 | NP_940949 | H | R | HR | probably damaging |
| rs11207440 | NP_006358 | G | C | GC | benign            |
| rs11207463 | NP_060761 | L | V | LV | benign            |
| rs11207949 | NP_859063 | T | A | TA | benign            |
| rs11208257 | NP_002624 | Y | H | YH | probably damaging |
| rs11208299 | NP_073611 | G | V | GV | possibly damaging |
| rs11209026 | NP_653302 | R | Q | RQ | benign            |
| rs11209235 | XP_015717 | A | T | AT | benign            |
| rs11210490 | XP_371259 | P | A | PA | benign            |
| rs11210805 | NP_689711 | C | S | CS | probably damaging |
| rs11210882 | NP_569707 | A | G | AG | benign            |
| rs11210882 | NP_002831 | A | G | AG | benign            |
| rs11211337 | NP_073582 | G | S | GS | possibly damaging |

|            |           |   |   |    |                   |
|------------|-----------|---|---|----|-------------------|
| rs11212587 | NP_612149 | G | R | GR | probably damaging |
| rs11212587 | NP_000042 | G | R | GR | probably damaging |
| rs11212684 | NP_055880 | R | Q | RQ | benign            |
| rs11213242 | XP_497318 | R | Q | RQ | benign            |
| rs11213538 | NP_065860 | T | A | TA | benign            |
| rs11213935 | NP_849156 | V | M | VM | benign            |
| rs11214077 | NP_002993 | H | R | HR | probably damaging |
| rs11214733 | NP_065937 | S | L | SL | possibly damaging |
| rs11215158 | NP_872301 | V | A | VA | benign            |
| rs11216131 | NP_116114 | R | I | RI | possibly damaging |
| rs11216163 | NP_079440 | D | E | DE | benign            |
| rs11216406 | NP_065744 | Y | H | YH | possibly damaging |
| rs11216935 | NP_055972 | L | F | LF | benign            |
| rs11219384 | XP_166780 | G | C | GC | probably damaging |
| rs11219408 | XP_372436 | R | Q | RQ | benign            |
| rs11219413 | XP_166777 | Q | R | QR | benign            |
| rs11219420 | XP_372437 | I | V | IV | benign            |
| rs11219508 | XP_370662 | L | P | LP | probably damaging |
| rs11219544 | XP_166767 | L | V | LV | possibly damaging |
| rs11221912 | NP_064613 | A | T | AT | benign            |
| rs11221912 | NP_955469 | A | T | AT | benign            |
| rs11222114 | NP_620686 | N | S | NS | benign            |
| rs11223168 | NP_055176 | I | V | IV | benign            |
| rs11223168 | NP_780775 | I | V | IV | benign            |
| rs11225086 | XP_374927 | A | T | AT | benign            |
| rs11225089 | XP_374927 | S | Y | SY | possibly damaging |
| rs11225090 | XP_374927 | I | T | IT | benign            |
| rs11225091 | XP_374927 | A | T | AT | benign            |
| rs11226609 | XP_495898 | T | A | TA | benign            |
| rs11227236 | NP_002410 | I | V | IV | benign            |
| rs11227245 | XP_374898 | R | C | RC | possibly damaging |
| rs11227386 | NP_149025 | L | M | LM | benign            |
| rs11227461 | NP_004283 | V | I | VI | benign            |
| rs11227599 | XP_166820 | T | I | TI | benign            |
| rs11227664 | NP_808878 | N | H | NH | benign            |
| rs11227675 | NP_055393 | H | R | HR | benign            |
| rs11227873 | NP_005986 | Q | H | QH | possibly damaging |
| rs11228166 | XP_166805 | H | R | HR | possibly damaging |
| rs11228610 | NP_620123 | G | R | GR | possibly damaging |
| rs11228732 | XP_372403 | C | G | CG | possibly damaging |
| rs11228733 | XP_372403 | R | C | RC | benign            |
| rs11228735 | XP_372403 | E | K | EK | benign            |
| rs11229007 | NP_002550 | Q | H | QH | probably damaging |
| rs11229019 | XP_495874 | D | G | DG | possibly damaging |
| rs11229133 | NP_001322 | S | F | SF | possibly damaging |
| rs11229277 | XP_166916 | V | A | VA | benign            |

|            |           |   |   |    |                   |
|------------|-----------|---|---|----|-------------------|
| rs11229278 | XP_166916 | V | I | VI | benign            |
| rs11229281 | XP_166916 | I | T | IT | probably damaging |
| rs11229301 | XP_166918 | R | C | RC | probably damaging |
| rs11229409 | XP_497297 | G | A | GA | benign            |
| rs11229410 | XP_497297 | I | V | IV | benign            |
| rs11229411 | XP_497297 | A | T | AT | benign            |
| rs11229413 | XP_497297 | W | R | WR | possibly damaging |
| rs11229457 | XP_372409 | C | Y | CY | possibly damaging |
| rs11229458 | XP_372409 | E | K | EK | benign            |
| rs11229651 | NP_659453 | K | E | KE | benign            |
| rs11229878 | XP_166227 | P | S | PS | probably damaging |
| rs11230346 | XP_166869 | L | I | LI | benign            |
| rs11230541 | XP_166871 | F | S | FS | possibly damaging |
| rs11230562 | NP_006716 | T | M | TM | possibly damaging |
| rs11230563 | NP_006716 | R | W | RW | probably damaging |
| rs11230600 | XP_166872 | I | T | IT | benign            |
| rs11230707 | NP_659454 | T | N | TN | benign            |
| rs11230983 | XP_372386 | R | H | RH | benign            |
| rs11231180 | XP_166879 | V | M | VM | benign            |
| rs11231197 | XP_495877 | G | E | GE | possibly damaging |
| rs11231241 | NP_003155 | Q | H | QH | possibly damaging |
| rs11231397 | NP_955384 | R | T | RT | benign            |
| rs11231409 | NP_955384 | S | G | SG | benign            |
| rs11231819 | NP_060954 | L | P | LP | possibly damaging |
| rs11231820 | NP_060954 | I | V | IV | benign            |
| rs11231866 | NP_005600 | R | G | RG | benign            |
| rs11231887 | XP_290516 | A | T | AT | benign            |
| rs11233400 | NP_055303 | V | G | VG | possibly damaging |
| rs11233510 | NP_056969 | E | K | EK | benign            |
| rs11235097 | NP_075069 | G | A | GA | benign            |
| rs11235419 | NP_006176 | G | S | GS | benign            |
| rs11235600 | XP_058426 | H | Y | HY | benign            |
| rs11235604 | XP_058426 | R | W | RW | possibly damaging |
| rs11235995 | NP_056346 | R | Q | RQ | benign            |
| rs11236045 | NP_003617 | L | F | LF | benign            |
| rs11236045 | NP_803172 | L | F | LF | possibly damaging |
| rs11236938 | NP_056331 | S | N | SN | benign            |
| rs11237145 | NP_878253 | I | V | IV | benign            |
| rs11237146 | NP_878253 | H | Y | HY | possibly damaging |
| rs11238409 | XP_380107 | N | T | NT | benign            |
| rs11238456 | NP_061060 | E | K | EK | benign            |
| rs11239910 | NP_899228 | K | E | KE | benign            |
| rs11239915 | NP_899228 | I | N | IN | benign            |
| rs11239917 | NP_899228 | V | M | VM | benign            |
| rs11240350 | NP_005067 | S | N | SN | benign            |
| rs11240573 | NP_689704 | G | R | GR | possibly damaging |



|            |           |   |   |    |                   |
|------------|-----------|---|---|----|-------------------|
| rs11240604 | NP_055642 | T | N | TN | possibly damaging |
| rs11240888 | XP_371534 | R | Q | RQ | possibly damaging |
| rs11240889 | XP_371534 | A | T | AT | benign            |
| rs11240899 | XP_371534 | S | F | SF | possibly damaging |
| rs11240949 | XP_291643 | A | T | AT | benign            |
| rs11241095 | NP_644810 | I | V | IV | benign            |
| rs11243011 | NP_006558 | N | S | NS | benign            |
| rs11243406 | NP_009102 | D | E | DE | benign            |
| rs11243731 | NP_055861 | P | L | PL | probably damaging |
| rs11244035 | NP_055396 | V | I | VI | benign            |
| rs11244036 | NP_055396 | R | W | RW | benign            |
| rs11244275 | NP_006050 | R | W | RW | benign            |
| rs11244323 | XP_351855 | L | F | LF | benign            |
| rs11244366 | NP_116117 | L | V | LV | benign            |
| rs11244674 | NP_060650 | E | D | ED | benign            |
| rs11245007 | XP_061055 | D | N | DN | benign            |
| rs11245008 | XP_061055 | R | H | RH | benign            |
| rs11245254 | NP_071409 | V | M | VM | benign            |
| rs11245379 | NP_115558 | L | I | LI | benign            |
| rs11246020 | NP_036371 | V | I | VI | benign            |
| rs11246181 | NP_932341 | H | Q | HQ | benign            |
| rs11246212 | XP_290536 | V | A | VA | benign            |
| rs11246606 | XP_061656 | S | F | SF | probably damaging |
| rs11246607 | XP_061656 | S | F | SF | benign            |
| rs11246608 | XP_061656 | C | Y | CY | probably damaging |
| rs11246609 | XP_061656 | K | R | KR | benign            |
| rs11246991 | NP_068580 | A | T | AT | benign            |
| rs11247226 | NP_859523 | I | V | IV | benign            |
| rs11247226 | NP_859524 | I | V | IV | benign            |
| rs11247226 | NP_060618 | I | V | IV | benign            |
| rs11247641 | NP_004663 | R | C | RC | possibly damaging |
| rs11247847 | NP_004446 | N | H | NH | possibly damaging |
| rs11247866 | XP_371237 | Q | R | QR | benign            |
| rs11247933 | NP_775845 | R | L | RL | benign            |
| rs11247975 | NP_036577 | A | E | AE | benign            |
| rs11248156 | XP_496692 | D | Y | DY | benign            |
| rs11248415 | NP_004716 | S | R | SR | possibly damaging |
| rs11248583 | NP_940979 | R | Q | RQ | possibly damaging |
| rs11248788 | XP_370826 | L | M | LM | benign            |
| rs11248789 | XP_370826 | T | I | TI | benign            |
| rs11248860 | NP_036599 | I | T | IT | benign            |
| rs11248871 | NP_003924 | D | A | DA | benign            |
| rs11248906 | XP_496111 | E | Q | EQ | benign            |
| rs11248931 | NP_067082 | A | T | AT | benign            |
| rs11250058 | XP_114621 | L | F | LF | benign            |
| rs11250353 | NP_061172 | S | I | SI | possibly damaging |

|            |           |   |   |    |                   |
|------------|-----------|---|---|----|-------------------|
| rs11252089 | NP_001291 | S | F | SF | possibly damaging |
| rs11253043 | NP_001809 | G | E | GE | benign            |
| rs11254274 | NP_001072 | R | Q | RQ | benign            |
| rs11254354 | NP_001072 | L | V | LV | benign            |
| rs11254413 | NP_004403 | H | Y | HY | benign            |
| rs11254692 | NP_055056 | F | V | FV | benign            |
| rs11257369 | NP_694988 | T | A | TA | benign            |
| rs11258194 | NP_068815 | M | K | MK | benign            |
| rs11258509 | NP_060497 | T | K | TK | benign            |
| rs11258565 | NP_060497 | Q | H | QH | benign            |
| rs11259953 | XP_058720 | H | P | HP | benign            |
| rs11259954 | XP_058720 | H | Q | HQ | benign            |
| rs11260579 | NP_002969 | R | P | RP | probably damaging |
| rs11261835 | XP_372094 | P | L | PL | probably damaging |
| rs11262003 | XP_372190 | R | Q | RQ | benign            |
| rs11262160 | XP_497046 | A | V | AV | benign            |
| rs11263523 | NP_444284 | H | Q | HQ | probably damaging |
| rs11264300 | NP_689707 | L | M | LM | benign            |
| rs11264496 | NP_839943 | D | N | DN | benign            |
| rs11264498 | NP_839943 | V | L | VL | benign            |
| rs11264581 | XP_371320 | R | H | RH | benign            |
| rs11264609 | XP_496418 | Q | R | QR | possibly damaging |
| rs11264680 | NP_859066 | M | V | MV | benign            |
| rs11264743 | NP_570968 | P | S | PS | possibly damaging |
| rs11266757 | NP_005545 | R | W | RW | probably damaging |
| rs11266773 | NP_000996 | T | P | TP | benign            |
| rs11266781 | NP_001393 | Y | C | YC | possibly damaging |
| rs11266788 | NP_001393 | P | Q | PQ | benign            |
| rs11266894 | NP_000958 | M | I | MI | benign            |
| rs11266911 | NP_005545 | E | Q | EQ | benign            |
| rs11267053 | NP_000517 | A | T | AT | benign            |
| rs11465205 | NP_877418 | G | S | GS | benign            |
| rs11465207 | NP_002447 | S | N | SN | benign            |
| rs11465207 | NP_877418 | S | N | SN | benign            |
| rs11465293 | NP_002982 | S | F | SF | possibly damaging |
| rs11465312 | NP_002982 | A | T | AT | benign            |
| rs11465313 | NP_002982 | Q | E | QE | benign            |
| rs11465374 | NP_066978 | H | R | HR | possibly damaging |
| rs11465376 | NP_066978 | R | Q | RQ | benign            |
| rs11465377 | NP_066978 | E | D | ED | benign            |
| rs11465379 | NP_066978 | K | N | KN | benign            |
| rs11465380 | NP_066978 | L | V | LV | benign            |
| rs11465393 | NP_066978 | A | S | AS | benign            |
| rs11465492 | NP_037410 | R | G | RG | benign            |
| rs11465553 | NP_443104 | V | I | VI | benign            |
| rs11465553 | NP_758846 | V | I | VI | benign            |

|            |           |   |   |    |                   |
|------------|-----------|---|---|----|-------------------|
| rs11465635 | NP_003846 | R | H | RH | benign            |
| rs11465644 | NP_003846 | N | K | NK | benign            |
| rs11465648 | NP_003846 | S | N | SN | benign            |
| rs11465716 | NP_003844 | V | I | VI | benign            |
| rs11465797 | NP_653302 | T | N | TN | benign            |
| rs11465829 | NP_001560 | T | I | TI | benign            |
| rs11465830 | NP_001560 | R | H | RH | benign            |
| rs11465972 | NP_009130 | I | V | IV | benign            |
| rs11466004 | NP_056179 | P | S | PS | benign            |
| rs11466110 | NP_002497 | V | M | VM | benign            |
| rs11466111 | NP_002497 | R | Q | RQ | possibly damaging |
| rs11466112 | NP_002497 | R | W | RW | probably damaging |
| rs11466259 | NP_003227 | V | M | VM | benign            |
| rs11466649 | NP_112218 | A | S | AS | benign            |
| rs11466650 | NP_112218 | L | P | LP | benign            |
| rs11466651 | NP_112218 | V | I | VI | benign            |
| rs11466653 | NP_112218 | M | T | MT | benign            |
| rs11466655 | NP_112218 | G | D | GD | possibly damaging |
| rs11466656 | NP_112218 | R | G | RG | possibly damaging |
| rs11466657 | NP_112218 | I | T | IT | benign            |
| rs11466658 | NP_112218 | R | W | RW | possibly damaging |
| rs11466660 | NP_112218 | Y | C | YC | probably damaging |
| rs11466676 | NP_683699 | T | R | TR | benign            |
| rs11466676 | NP_004186 | T | R | TR | benign            |
| rs11466687 | NP_683699 | E | K | EK | benign            |
| rs11466687 | NP_683700 | E | K | EK | benign            |
| rs11466687 | NP_004186 | E | K | EK | benign            |
| rs11466688 | NP_683699 | D | N | DN | benign            |
| rs11466688 | NP_683700 | D | N | DN | benign            |
| rs11466688 | NP_004186 | D | N | DN | benign            |
| rs11466693 | NP_683700 | V | M | VM | benign            |
| rs11466693 | NP_004186 | V | M | VM | benign            |
| rs11466694 | NP_004186 | R | Q | RQ | benign            |
| rs11466719 | NP_891549 | R | C | RC | benign            |
| rs11466721 | NP_891549 | L | V | LV | benign            |
| rs11466724 | NP_891549 | A | T | AT | benign            |
| rs11466802 | NP_150377 | A | T | AT | benign            |
| rs11466803 | NP_150377 | P | A | PA | possibly damaging |
| rs11485247 | XP_496343 | Y | H | YH | benign            |
| rs11485247 | XP_496345 | Y | H | YH | benign            |
| rs11487758 | XP_496349 | F | S | FS | benign            |
| rs11488537 | NP_056198 | C | Y | CY | benign            |
| rs11488569 | XP_375718 | M | T | MT | benign            |
| rs11489970 | NP_999626 | H | Y | HY | benign            |
| rs11489971 | NP_999626 | I | T | IT | benign            |
| rs11489972 | NP_999626 | F | C | FC | possibly damaging |

|            |           |   |   |    |                   |
|------------|-----------|---|---|----|-------------------|
| rs11491191 | NP_001247 | S | F | SF | possibly damaging |
| rs11491243 | XP_497879 | P | L | PL | possibly damaging |
| rs11498200 | NP_004339 | R | C | RC | benign            |
| rs11499034 | NP_005056 | D | G | DG | possibly damaging |
| rs11499281 | NP_060049 | A | V | AV | benign            |
| rs11499281 | NP_015568 | A | V | AV | benign            |
| rs11499281 | NP_004397 | A | V | AV | benign            |
| rs11499282 | NP_004397 | P | S | PS | benign            |
| rs11502782 | XP_495917 | R | W | RW | possibly damaging |
| rs11504162 | XP_372468 | R | C | RC | probably damaging |
| rs11505886 | NP_689963 | V | I | VI | benign            |
| rs11507224 | XP_212241 | S | R | SR | benign            |
| rs11507224 | XP_212238 | S | R | SR | benign            |
| rs11509436 | NP_004823 | S | C | SC | probably damaging |
| rs11509438 | NP_004823 | E | K | EK | benign            |
| rs11509439 | NP_004823 | A | V | AV | benign            |
| rs11510885 | XP_495821 | S | P | SP | benign            |
| rs11512276 | XP_210181 | G | W | GW | benign            |
| rs11513327 | XP_495912 | H | P | HP | possibly damaging |
| rs11516609 | XP_495821 | I | T | IT | possibly damaging |
| rs11516610 | XP_495821 | H | R | HR | benign            |
| rs11524166 | NP_878247 | V | G | VG | probably damaging |
| rs11525962 | XP_030729 | S | A | SA | benign            |
| rs11525962 | XP_497069 | S | A | SA | benign            |
| rs11526468 | NP_006369 | A | T | AT | probably damaging |
| rs11526470 | NP_795367 | V | M | VM | benign            |
| rs11528010 | NP_004320 | P | T | PT | benign            |
| rs11531577 | NP_036579 | L | F | LF | benign            |
| rs11531593 | NP_000483 | F | L | FL | benign            |
| rs11535673 | NP_795367 | C | Y | CY | possibly damaging |
| rs11535718 | XP_166777 | A | V | AV | benign            |
| rs11536884 | NP_612566 | L | F | LF | benign            |
| rs11536884 | NP_612567 | L | F | LF | benign            |
| rs11536982 | NP_004130 | N | K | NK | benign            |
| rs11537112 | XP_497039 | H | L | HL | probably damaging |
| rs11537112 | XP_497029 | H | L | HL | probably damaging |
| rs11537119 | NP_795367 | R | T | RT | probably damaging |
| rs11537531 | NP_808852 | K | E | KE | benign            |
| rs11537541 | NP_000535 | L | P | LP | possibly damaging |
| rs11537541 | NP_061313 | L | P | LP | possibly damaging |
| rs11537549 | NP_775918 | G | S | GS | possibly damaging |
| rs11537550 | NP_631916 | F | L | FL | benign            |
| rs11537562 | NP_001014 | H | R | HR | benign            |
| rs11537565 | NP_001014 | H | N | HN | benign            |
| rs11537581 | NP_114115 | V | M | VM | benign            |
| rs11537585 | NP_690040 | Y | C | YC | probably damaging |

|            |           |   |   |    |                   |
|------------|-----------|---|---|----|-------------------|
| rs11537585 | NP_003786 | Y | C | YC | probably damaging |
| rs11537587 | NP_690040 | D | G | DG | possibly damaging |
| rs11537587 | NP_003786 | D | G | DG | possibly damaging |
| rs11537587 | NP_690041 | D | G | DG | possibly damaging |
| rs11537594 | NP_000098 | A | T | AT | benign            |
| rs11537618 | NP_000976 | E | Q | EQ | benign            |
| rs11537629 | NP_078994 | P | S | PS | possibly damaging |
| rs11537643 | NP_000543 | R | Q | RQ | benign            |
| rs11537645 | NP_008950 | S | R | SR | benign            |
| rs11537645 | NP_861515 | S | R | SR | possibly damaging |
| rs11537645 | NP_861516 | S | R | SR | possibly damaging |
| rs11537675 | NP_003063 | R | L | RL | probably damaging |
| rs11537685 | NP_150638 | V | G | VG | possibly damaging |
| rs11537686 | NP_150638 | Q | H | QH | possibly damaging |
| rs11537691 | XP_497936 | E | A | EA | benign            |
| rs11537692 | NP_851030 | T | I | TI | benign            |
| rs11537692 | NP_851034 | T | I | TI | benign            |
| rs11537692 | NP_073208 | T | I | TI | benign            |
| rs11537696 | NP_055040 | E | D | ED | possibly damaging |
| rs11537698 | NP_055040 | S | F | SF | benign            |
| rs11537706 | NP_006631 | V | M | VM | benign            |
| rs11537711 | XP_371179 | P | T | PT | possibly damaging |
| rs11537736 | NP_114032 | V | A | VA | benign            |
| rs11537736 | NP_004492 | V | A | VA | benign            |
| rs11537758 | NP_066289 | R | I | RI | probably damaging |
| rs11537768 | NP_066289 | T | I | TI | possibly damaging |
| rs11537775 | NP_006380 | T | I | TI | possibly damaging |
| rs11537796 | NP_061111 | G | R | GR | benign            |
| rs11537818 | NP_115735 | Q | L | QL | probably damaging |
| rs11537826 | NP_006830 | L | V | LV | benign            |
| rs11537828 | NP_060140 | E | D | ED | benign            |
| rs11537835 | NP_006017 | A | P | AP | possibly damaging |
| rs11537843 | NP_057231 | L | V | LV | benign            |
| rs11537847 | XP_041221 | L | V | LV | benign            |
| rs11537862 | NP_001003 | K | E | KE | benign            |
| rs11537863 | NP_001003 | E | D | ED | possibly damaging |
| rs11537866 | NP_001003 | K | E | KE | benign            |
| rs11537868 | NP_001003 | V | L | VL | benign            |
| rs11537870 | NP_001003 | R | G | RG | probably damaging |
| rs11537878 | NP_000131 | Q | K | QK | benign            |
| rs11537879 | NP_000131 | Q | K | QK | benign            |
| rs11537880 | NP_000131 | P | T | PT | probably damaging |
| rs11537881 | NP_071344 | S | I | SI | benign            |
| rs11537882 | NP_054907 | S | A | SA | benign            |
| rs11537888 | NP_009194 | V | A | VA | benign            |
| rs11537888 | NP_955474 | V | A | VA | benign            |

|            |           |   |   |    |                   |
|------------|-----------|---|---|----|-------------------|
| rs11537888 | NP_955476 | V | A | VA | benign            |
| rs11537909 | NP_114174 | P | L | PL | probably damaging |
| rs11537909 | NP_036468 | P | L | PL | probably damaging |
| rs11537910 | NP_114174 | E | D | ED | benign            |
| rs11537910 | NP_036468 | E | D | ED | benign            |
| rs11537965 | NP_004330 | P | Q | PQ | benign            |
| rs11537967 | NP_004330 | C | S | CS | probably damaging |
| rs11537986 | NP_006463 | R | T | RT | possibly damaging |
| rs11537995 | NP_005634 | E | K | EK | benign            |
| rs11537996 | NP_005634 | S | F | SF | possibly damaging |
| rs11538016 | NP_002905 | F | C | FC | probably damaging |
| rs11538016 | NP_852136 | F | C | FC | probably damaging |
| rs11538032 | NP_008861 | D | G | DG | probably damaging |
| rs11538032 | NP_733779 | D | G | DG | probably damaging |
| rs11538034 | NP_008861 | F | L | FL | probably damaging |
| rs11538034 | NP_733779 | F | L | FL | probably damaging |
| rs11538037 | XP_377259 | P | H | PH | possibly damaging |
| rs11538041 | XP_377259 | L | P | LP | probably damaging |
| rs11538042 | XP_377259 | P | H | PH | probably damaging |
| rs11538047 | NP_115956 | K | R | KR | benign            |
| rs11538053 | NP_000299 | E | K | EK | benign            |
| rs11538063 | XP_496143 | T | A | TA | benign            |
| rs11538076 | NP_612367 | A | S | AS | benign            |
| rs11538077 | NP_001779 | R | H | RH | benign            |
| rs11538094 | XP_375024 | E | D | ED | benign            |
| rs11538100 | NP_001145 | E | A | EA | probably damaging |
| rs11538111 | NP_981944 | L | F | LF | benign            |
| rs11538111 | NP_981946 | L | F | LF | benign            |
| rs11538111 | NP_005554 | L | F | LF | benign            |
| rs11538113 | NP_981944 | M | T | MT | probably damaging |
| rs11538113 | NP_981946 | M | T | MT | probably damaging |
| rs11538113 | NP_005554 | M | T | MT | probably damaging |
| rs11538121 | NP_981944 | P | L | PL | probably damaging |
| rs11538121 | NP_981946 | P | L | PL | probably damaging |
| rs11538121 | NP_005554 | P | L | PL | probably damaging |
| rs11538124 | NP_981944 | N | D | ND | possibly damaging |
| rs11538124 | NP_981946 | N | D | ND | possibly damaging |
| rs11538124 | NP_005554 | N | D | ND | possibly damaging |
| rs11538141 | NP_002766 | E | G | EG | benign            |
| rs11538142 | NP_060305 | D | G | DG | possibly damaging |
| rs11538142 | NP_067077 | D | G | DG | probably damaging |
| rs11538152 | NP_004306 | P | R | PR | probably damaging |
| rs11538152 | NP_808592 | P | R | PR | probably damaging |
| rs11538158 | NP_203693 | K | M | KM | probably damaging |
| rs11538161 | NP_203693 | D | N | DN | benign            |
| rs11538169 | NP_061886 | K | R | KR | benign            |

|            |           |   |   |    |                   |
|------------|-----------|---|---|----|-------------------|
| rs11538170 | NP_061886 | R | C | RC | possibly damaging |
| rs11538172 | NP_073571 | V | M | VM | benign            |
| rs11538177 | NP_037403 | Q | R | QR | benign            |
| rs11538179 | NP_037403 | L | V | LV | benign            |
| rs11538180 | NP_037403 | G | S | GS | benign            |
| rs11538183 | XP_290345 | T | I | TI | benign            |
| rs11538186 | NP_005680 | S | C | SC | benign            |
| rs11538193 | NP_060859 | S | W | SW | probably damaging |
| rs11538208 | NP_000468 | M | K | MK | probably damaging |
| rs11538209 | NP_000468 | L | P | LP | probably damaging |
| rs11538213 | NP_000468 | F | I | FI | possibly damaging |
| rs11538214 | NP_000468 | E | V | EV | probably damaging |
| rs11538220 | NP_000468 | K | E | KE | probably damaging |
| rs11538221 | NP_000468 | E | G | EG | probably damaging |
| rs11538222 | NP_000468 | A | T | AT | benign            |
| rs11538223 | NP_000468 | N | D | ND | possibly damaging |
| rs11538226 | NP_000468 | T | A | TA | benign            |
| rs11538227 | NP_000468 | S | P | SP | benign            |
| rs11538228 | NP_000468 | A | G | AG | possibly damaging |
| rs11538236 | NP_004580 | A | V | AV | benign            |
| rs11538243 | NP_003278 | K | E | KE | benign            |
| rs11538253 | NP_004452 | N | S | NS | possibly damaging |
| rs11538263 | NP_004629 | R | Q | RQ | benign            |
| rs11538263 | NP_542417 | R | Q | RQ | benign            |
| rs11538264 | NP_004629 | V | M | VM | benign            |
| rs11538264 | NP_542417 | V | M | VM | benign            |
| rs11538273 | NP_006797 | S | P | SP | benign            |
| rs11538274 | NP_006797 | P | R | PR | probably damaging |
| rs11538284 | NP_066952 | D | N | DN | probably damaging |
| rs11538298 | NP_004270 | Q | E | QE | benign            |
| rs11538308 | NP_000999 | D | H | DH | probably damaging |
| rs11538339 | NP_055322 | T | A | TA | benign            |
| rs11538340 | NP_004541 | P | T | PT | benign            |
| rs11538352 | NP_005994 | Q | R | QR | benign            |
| rs11538355 | NP_110379 | P | T | PT | probably damaging |
| rs11538360 | NP_036241 | R | G | RG | possibly damaging |
| rs11538373 | XP_371542 | A | V | AV | benign            |
| rs11538380 | NP_005561 | G | R | GR | probably damaging |
| rs11538410 | NP_006005 | E | G | EG | possibly damaging |
| rs11538412 | NP_510883 | L | V | LV | benign            |
| rs11538412 | NP_079417 | L | V | LV | benign            |
| rs11538420 | NP_037386 | F | L | FL | possibly damaging |
| rs11538428 | NP_004554 | K | Q | KQ | benign            |
| rs11538429 | NP_114404 | E | D | ED | benign            |
| rs11538436 | XP_498351 | Q | R | QR | benign            |
| rs11538443 | NP_060930 | L | F | LF | benign            |

|            |           |   |   |    |                   |
|------------|-----------|---|---|----|-------------------|
| rs11538446 | NP_663731 | V | G | VG | probably damaging |
| rs11538455 | XP_056681 | K | M | KM | benign            |
| rs11538456 | XP_056681 | F | I | FI | probably damaging |
| rs11538543 | NP_003756 | D | A | DA | probably damaging |
| rs11538552 | NP_006591 | T | A | TA | possibly damaging |
| rs11538565 | NP_001856 | A | S | AS | benign            |
| rs11538581 | XP_088142 | P | A | PA | possibly damaging |
| rs11538582 | XP_088142 | S | R | SR | benign            |
| rs11538584 | XP_088142 | P | T | PT | possibly damaging |
| rs11538585 | XP_088142 | L | V | LV | benign            |
| rs11538586 | XP_088142 | G | R | GR | possibly damaging |
| rs11538610 | NP_705903 | V | L | VL | benign            |
| rs11538610 | NP_705902 | V | L | VL | benign            |
| rs11538611 | XP_497117 | Q | R | QR | possibly damaging |
| rs11538613 | NP_001958 | H | Y | HY | possibly damaging |
| rs11538614 | NP_001958 | A | V | AV | possibly damaging |
| rs11538616 | NP_001958 | Q | H | QH | benign            |
| rs11538618 | NP_001958 | I | S | IS | probably damaging |
| rs11538619 | NP_277039 | V | G | VG | possibly damaging |
| rs11538626 | NP_067023 | R | Q | RQ | benign            |
| rs11538627 | NP_067023 | E | D | ED | benign            |
| rs11538635 | NP_005683 | N | I | NI | probably damaging |
| rs11538635 | NP_009120 | N | I | NI | probably damaging |
| rs11538639 | NP_006176 | R | C | RC | possibly damaging |
| rs11538640 | NP_006176 | L | P | LP | possibly damaging |
| rs11538642 | NP_006176 | R | L | RL | possibly damaging |
| rs11538643 | NP_006176 | R | C | RC | possibly damaging |
| rs11538653 | NP_114143 | R | W | RW | probably damaging |
| rs11538663 | NP_003270 | I | T | IT | probably damaging |
| rs11538671 | NP_056525 | C | F | CF | probably damaging |
| rs11538675 | NP_056525 | Q | E | QE | benign            |
| rs11538677 | NP_056493 | I | V | IV | benign            |
| rs11538692 | NP_037379 | P | S | PS | possibly damaging |
| rs11538700 | NP_009214 | M | R | MR | benign            |
| rs11538710 | NP_000229 | I | N | IN | possibly damaging |
| rs11538710 | NP_742053 | I | N | IN | probably damaging |
| rs11538710 | NP_742054 | I | N | IN | probably damaging |
| rs11538722 | NP_689620 | R | L | RL | possibly damaging |
| rs11538726 | NP_036437 | P | L | PL | benign            |
| rs11538740 | NP_644804 | V | L | VL | benign            |
| rs11538740 | NP_003479 | V | L | VL | benign            |
| rs11538753 | NP_898902 | G | D | GD | possibly damaging |
| rs11538755 | NP_898902 | P | T | PT | probably damaging |
| rs11538756 | NP_898902 | P | T | PT | probably damaging |
| rs11538758 | NP_898902 | P | Q | PQ | probably damaging |
| rs11538762 | NP_898902 | P | H | PH | probably damaging |



|            |           |   |   |    |                   |
|------------|-----------|---|---|----|-------------------|
| rs11538764 | NP_898902 | R | S | RS | benign            |
| rs11538766 | NP_898902 | D | V | DV | probably damaging |
| rs11538767 | NP_898902 | V | A | VA | possibly damaging |
| rs11538768 | NP_898902 | H | R | HR | probably damaging |
| rs11538769 | NP_898902 | G | S | GS | possibly damaging |
| rs11538771 | NP_005608 | G | C | GC | probably damaging |
| rs11538774 | NP_005608 | A | P | AP | possibly damaging |
| rs11538777 | NP_005608 | Q | H | QH | probably damaging |
| rs11538779 | NP_005608 | V | L | VL | possibly damaging |
| rs11538796 | NP_067051 | K | T | KT | benign            |
| rs11538797 | NP_067051 | S | R | SR | benign            |
| rs11538802 | NP_005909 | V | G | VG | probably damaging |
| rs11538808 | NP_000425 | A | V | AV | benign            |
| rs11538809 | NP_000425 | R | C | RC | probably damaging |
| rs11538821 | NP_057211 | G | S | GS | benign            |
| rs11538824 | NP_057211 | R | S | RS | benign            |
| rs11538828 | NP_057211 | P | T | PT | possibly damaging |
| rs11538832 | NP_542156 | P | L | PL | possibly damaging |
| rs11538832 | NP_542155 | P | L | PL | probably damaging |
| rs11538835 | NP_006868 | S | L | SL | possibly damaging |
| rs11538845 | NP_003743 | R | S | RS | benign            |
| rs11538848 | NP_003743 | K | R | KR | benign            |
| rs11538849 | NP_003743 | D | H | DH | possibly damaging |
| rs11538850 | NP_003743 | A | V | AV | benign            |
| rs11538872 | NP_055787 | G | D | GD | possibly damaging |
| rs11538875 | NP_116035 | P | H | PH | probably damaging |
| rs11538876 | NP_116035 | H | D | HD | possibly damaging |
| rs11538879 | NP_055113 | A | T | AT | benign            |
| rs11538883 | NP_036602 | L | F | LF | benign            |
| rs11538901 | NP_619539 | V | M | VM | benign            |
| rs11538901 | NP_004833 | V | M | VM | benign            |
| rs11538901 | NP_057461 | V | M | VM | benign            |
| rs11538906 | NP_000604 | R | W | RW | probably damaging |
| rs11538920 | NP_690852 | S | F | SF | benign            |
| rs11538929 | NP_002505 | R | H | RH | possibly damaging |
| rs11538931 | NP_851313 | K | R | KR | benign            |
| rs11538931 | NP_851823 | K | R | KR | benign            |
| rs11538931 | NP_848026 | K | R | KR | benign            |
| rs11538939 | NP_006271 | T | I | TI | possibly damaging |
| rs11538941 | NP_055852 | W | G | WG | probably damaging |
| rs11538949 | NP_000099 | C | G | CG | possibly damaging |
| rs11538955 | NP_071897 | K | N | KN | benign            |
| rs11538959 | NP_786886 | D | H | DH | probably damaging |
| rs11538960 | NP_786886 | R | H | RH | benign            |
| rs11538968 | NP_031381 | D | N | DN | benign            |
| rs11538975 | NP_031381 | K | E | KE | possibly damaging |

|            |           |   |   |    |                   |
|------------|-----------|---|---|----|-------------------|
| rs11538980 | NP_031381 | T | A | TA | benign            |
| rs11538992 | XP_090844 | L | H | LH | probably damaging |
| rs11538993 | NP_055083 | Y | C | YC | probably damaging |
| rs11538994 | NP_055083 | D | G | DG | probably damaging |
| rs11539050 | XP_056681 | A | V | AV | possibly damaging |
| rs11539051 | XP_056681 | S | P | SP | possibly damaging |
| rs11539052 | XP_056681 | A | T | AT | benign            |
| rs11539055 | XP_056681 | V | A | VA | possibly damaging |
| rs11539060 | XP_056681 | E | G | EG | probably damaging |
| rs11539068 | NP_002942 | P | R | PR | probably damaging |
| rs11539069 | NP_002942 | G | V | GV | probably damaging |
| rs11539072 | NP_478070 | R | I | RI | possibly damaging |
| rs11539073 | NP_478070 | G | V | GV | benign            |
| rs11539077 | NP_056415 | H | N | HN | probably damaging |
| rs11539084 | NP_009108 | I | T | IT | possibly damaging |
| rs11539086 | NP_009108 | E | Q | EQ | benign            |
| rs11539087 | NP_009108 | P | H | PH | probably damaging |
| rs11539089 | NP_009108 | R | Q | RQ | benign            |
| rs11539101 | NP_001738 | S | L | SL | possibly damaging |
| rs11539103 | NP_001738 | R | W | RW | probably damaging |
| rs11539111 | NP_620153 | I | M | IM | benign            |
| rs11539121 | XP_208072 | R | H | RH | probably damaging |
| rs11539122 | XP_208072 | Y | C | YC | possibly damaging |
| rs11539127 | XP_208072 | R | L | RL | probably damaging |
| rs11539135 | XP_497335 | A | V | AV | possibly damaging |
| rs11539157 | NP_071763 | E | D | ED | benign            |
| rs11539157 | NP_660095 | E | D | ED | benign            |
| rs11539160 | NP_001216 | E | G | EG | possibly damaging |
| rs11539163 | NP_009122 | A | T | AT | benign            |
| rs11539177 | NP_003936 | E | K | EK | benign            |
| rs11539181 | NP_060739 | R | S | RS | possibly damaging |
| rs11539182 | NP_000529 | G | S | GS | benign            |
| rs11539196 | NP_003591 | G | W | GW | probably damaging |
| rs11539196 | NP_940835 | G | W | GW | probably damaging |
| rs11539196 | NP_940836 | G | W | GW | probably damaging |
| rs11539196 | NP_940837 | G | W | GW | probably damaging |
| rs11539196 | NP_940838 | G | W | GW | probably damaging |
| rs11539196 | NP_940839 | G | W | GW | probably damaging |
| rs11539201 | NP_003468 | R | G | RG | possibly damaging |
| rs11539202 | NP_003468 | T | A | TA | benign            |
| rs11539209 | NP_116188 | N | I | NI | probably damaging |
| rs11539210 | NP_116188 | Y | C | YC | possibly damaging |
| rs11539213 | NP_057485 | P | A | PA | possibly damaging |
| rs11539224 | NP_056194 | C | F | CF | probably damaging |
| rs11539229 | NP_056194 | S | T | ST | benign            |
| rs11539235 | NP_612510 | T | A | TA | possibly damaging |

|            |           |   |   |    |                   |
|------------|-----------|---|---|----|-------------------|
| rs11539241 | NP_079509 | R | H | RH | possibly damaging |
| rs11539244 | NP_653165 | F | L | FL | possibly damaging |
| rs11539254 | NP_005186 | Q | L | QL | benign            |
| rs11539260 | NP_859053 | K | I | KI | benign            |
| rs11539261 | NP_065995 | M | I | MI | benign            |
| rs11539262 | NP_065995 | A | D | AD | benign            |
| rs11539267 | XP_371413 | S | R | SR | benign            |
| rs11539288 | NP_003293 | P | S | PS | possibly damaging |
| rs11539301 | NP_057710 | E | G | EG | possibly damaging |
| rs11539307 | NP_061880 | P | Q | PQ | probably damaging |
| rs11539309 | NP_006678 | R | M | RM | possibly damaging |
| rs11539313 | NP_006378 | P | T | PT | benign            |
| rs11539315 | NP_006378 | A | T | AT | benign            |
| rs11539319 | NP_001080 | P | H | PH | probably damaging |
| rs11539350 | XP_371813 | R | Q | RQ | possibly damaging |
| rs11539351 | XP_371813 | G | S | GS | benign            |
| rs11539353 | NP_004259 | P | Q | PQ | possibly damaging |
| rs11539365 | NP_077006 | E | K | EK | benign            |
| rs11539377 | NP_057673 | N | D | ND | benign            |
| rs11539378 | NP_003396 | K | N | KN | benign            |
| rs11539385 | NP_714922 | L | F | LF | benign            |
| rs11539390 | NP_003130 | V | F | VF | benign            |
| rs11539391 | NP_067612 | E | G | EG | possibly damaging |
| rs11539391 | NP_001774 | E | G | EG | possibly damaging |
| rs11539394 | NP_115906 | R | K | RK | benign            |
| rs11539399 | NP_001375 | P | L | PL | probably damaging |
| rs11539406 | NP_060705 | D | G | DG | probably damaging |
| rs11539410 | NP_005822 | I | T | IT | benign            |
| rs11539417 | XP_372195 | C | G | CG | probably damaging |
| rs11539425 | NP_056034 | A | G | AG | benign            |
| rs11539429 | NP_055228 | E | Q | EQ | benign            |
| rs11539431 | NP_006744 | R | L | RL | benign            |
| rs11539433 | NP_000880 | H | Y | HY | benign            |
| rs11539435 | NP_536338 | R | C | RC | possibly damaging |
| rs11539435 | NP_536339 | R | C | RC | probably damaging |
| rs11539435 | NP_072097 | R | C | RC | probably damaging |
| rs11539439 | NP_057314 | E | G | EG | possibly damaging |
| rs11539440 | NP_057314 | E | A | EA | possibly damaging |
| rs11539456 | NP_004863 | T | I | TI | possibly damaging |
| rs11539457 | NP_004863 | R | Q | RQ | benign            |
| rs11539459 | NP_004863 | T | A | TA | benign            |
| rs11539462 | NP_036243 | T | I | TI | probably damaging |
| rs11539467 | NP_003935 | S | F | SF | possibly damaging |
| rs11539472 | NP_000405 | A | S | AS | benign            |
| rs11539495 | NP_005549 | T | I | TI | benign            |
| rs11539519 | NP_064619 | E | K | EK | benign            |

|            |           |   |   |    |                   |
|------------|-----------|---|---|----|-------------------|
| rs11539520 | NP_064619 | A | S | AS | benign            |
| rs11539521 | NP_064619 | S | P | SP | benign            |
| rs11539522 | NP_064619 | L | P | LP | benign            |
| rs11539529 | NP_115872 | P | S | PS | probably damaging |
| rs11539532 | XP_290536 | S | C | SC | possibly damaging |
| rs11539538 | NP_056258 | S | P | SP | benign            |
| rs11539539 | NP_064543 | L | P | LP | possibly damaging |
| rs11539556 | NP_944490 | K | R | KR | benign            |
| rs11539556 | NP_003121 | K | R | KR | benign            |
| rs11539572 | NP_056494 | T | A | TA | benign            |
| rs11539574 | NP_056494 | L | P | LP | possibly damaging |
| rs11539586 | NP_002324 | A | V | AV | benign            |
| rs11539594 | NP_004059 | A | T | AT | benign            |
| rs11539599 | NP_004059 | F | S | FS | probably damaging |
| rs11539600 | NP_004059 | I | T | IT | possibly damaging |
| rs11539603 | NP_997626 | T | S | TS | possibly damaging |
| rs11539608 | NP_057366 | S | P | SP | possibly damaging |
| rs11539609 | NP_853554 | A | P | AP | benign            |
| rs11539609 | NP_853553 | A | P | AP | benign            |
| rs11539626 | NP_079033 | R | L | RL | possibly damaging |
| rs11539628 | NP_006364 | A | V | AV | benign            |
| rs11539635 | NP_055322 | L | I | LI | benign            |
| rs11539635 | NP_775738 | L | I | LI | benign            |
| rs11539639 | NP_059344 | S | P | SP | possibly damaging |
| rs11539639 | NP_006331 | S | P | SP | possibly damaging |
| rs11539639 | NP_059345 | S | P | SP | possibly damaging |
| rs11539644 | NP_056307 | P | L | PL | probably damaging |
| rs11539656 | NP_004879 | C | Y | CY | benign            |
| rs11539658 | NP_004879 | I | F | IF | benign            |
| rs11539662 | NP_056219 | A | S | AS | benign            |
| rs11539679 | NP_149082 | P | L | PL | probably damaging |
| rs11539679 | NP_148977 | P | L | PL | probably damaging |
| rs11539687 | NP_110446 | G | V | GV | probably damaging |
| rs11539689 | NP_056016 | G | D | GD | benign            |
| rs11539696 | NP_068834 | V | M | VM | benign            |
| rs11539716 | NP_054905 | Q | K | QK | benign            |
| rs11539722 | NP_006462 | M | T | MT | probably damaging |
| rs11539724 | NP_006462 | R | G | RG | probably damaging |
| rs11539726 | NP_006462 | M | V | MV | possibly damaging |
| rs11539737 | NP_001237 | L | P | LP | possibly damaging |
| rs11539737 | NP_982293 | L | P | LP | possibly damaging |
| rs11539739 | NP_065138 | Q | K | QK | benign            |
| rs11539752 | NP_004122 | P | A | PA | benign            |
| rs11539762 | NP_620123 | R | Q | RQ | benign            |
| rs11539763 | NP_056132 | L | S | LS | possibly damaging |
| rs11539783 | NP_006619 | K | E | KE | benign            |

|            |           |   |   |    |                   |
|------------|-----------|---|---|----|-------------------|
| rs11539784 | NP_006619 | P | H | PH | probably damaging |
| rs11539804 | XP_370737 | C | G | CG | probably damaging |
| rs11539812 | NP_110410 | Y | F | YF | benign            |
| rs11539826 | NP_008930 | P | L | PL | probably damaging |
| rs11539838 | NP_149024 | C | Y | CY | probably damaging |
| rs11539839 | NP_076955 | P | L | PL | benign            |
| rs11539846 | NP_002296 | F | S | FS | probably damaging |
| rs11539850 | NP_002296 | L | P | LP | probably damaging |
| rs11539852 | NP_002296 | E | G | EG | possibly damaging |
| rs11539862 | NP_000177 | A | T | AT | benign            |
| rs11539864 | NP_036557 | I | T | IT | possibly damaging |
| rs11539864 | NP_689937 | I | T | IT | possibly damaging |
| rs11539884 | NP_150644 | V | L | VL | benign            |
| rs11539884 | NP_000964 | V | L | VL | benign            |
| rs11539885 | NP_150644 | R | L | RL | probably damaging |
| rs11539885 | NP_000964 | R | L | RL | probably damaging |
| rs11539886 | NP_150644 | S | L | SL | probably damaging |
| rs11539886 | NP_000964 | S | L | SL | probably damaging |
| rs11539891 | NP_150644 | A | V | AV | benign            |
| rs11539891 | NP_000964 | A | V | AV | benign            |
| rs11539894 | NP_150644 | R | H | RH | benign            |
| rs11539894 | NP_000964 | R | H | RH | benign            |
| rs11539895 | NP_150644 | A | P | AP | benign            |
| rs11539895 | NP_000964 | A | P | AP | benign            |
| rs11539897 | NP_150644 | H | Y | HY | probably damaging |
| rs11539897 | NP_000964 | H | Y | HY | probably damaging |
| rs11539906 | NP_150644 | V | L | VL | benign            |
| rs11539906 | NP_000964 | V | L | VL | benign            |
| rs11539907 | NP_150644 | A | T | AT | possibly damaging |
| rs11539907 | NP_000964 | A | T | AT | possibly damaging |
| rs11539909 | NP_036232 | N | H | NH | benign            |
| rs11539918 | NP_003356 | R | W | RW | probably damaging |
| rs11539937 | NP_945320 | Q | H | QH | benign            |
| rs11539937 | NP_945321 | Q | H | QH | benign            |
| rs11539937 | NP_001121 | Q | H | QH | benign            |
| rs11539946 | NP_001760 | R | G | RG | probably damaging |
| rs11539948 | NP_061931 | P | S | PS | probably damaging |
| rs11539954 | NP_002107 | A | V | AV | benign            |
| rs11539956 | NP_005505 | R | H | RH | probably damaging |
| rs11539957 | NP_002107 | R | W | RW | probably damaging |
| rs11539959 | NP_002107 | D | H | DH | probably damaging |
| rs11539960 | NP_002107 | Q | H | QH | benign            |
| rs11539961 | NP_002107 | A | T | AT | benign            |
| rs11539962 | NP_005505 | R | P | RP | benign            |
| rs11539963 | NP_002107 | D | H | DH | benign            |
| rs11539964 | NP_002107 | G | C | GC | probably damaging |

|            |           |   |   |    |                   |
|------------|-----------|---|---|----|-------------------|
| rs11539969 | NP_066953 | P | H | PH | benign            |
| rs11539972 | NP_054901 | I | V | IV | benign            |
| rs11540005 | NP_009034 | R | C | RC | possibly damaging |
| rs11540006 | NP_009034 | M | R | MR | benign            |
| rs11540007 | NP_009034 | G | S | GS | probably damaging |
| rs11540010 | NP_009034 | E | G | EG | probably damaging |
| rs11540014 | NP_689704 | H | Y | HY | possibly damaging |
| rs11540043 | NP_003123 | L | V | LV | benign            |
| rs11540047 | XP_496306 | S | N | SN | benign            |
| rs11540063 | NP_005872 | I | V | IV | benign            |
| rs11540067 | XP_291062 | H | Y | HY | possibly damaging |
| rs11540070 | NP_942093 | R | G | RG | probably damaging |
| rs11540086 | NP_689621 | H | Y | HY | benign            |
| rs11540092 | NP_006532 | P | L | PL | probably damaging |
| rs11540106 | NP_150596 | P | L | PL | probably damaging |
| rs11540107 | NP_150596 | D | G | DG | benign            |
| rs11540114 | NP_705935 | E | Q | EQ | benign            |
| rs11540121 | NP_705935 | V | L | VL | benign            |
| rs11540147 | XP_496826 | G | S | GS | benign            |
| rs11540150 | NP_005971 | E | D | ED | benign            |
| rs11540152 | NP_001062 | F | L | FL | probably damaging |
| rs11540153 | NP_001062 | T | I | TI | probably damaging |
| rs11540154 | NP_619520 | A | V | AV | benign            |
| rs11540154 | NP_055781 | A | V | AV | benign            |
| rs11540154 | NP_619519 | A | V | AV | benign            |
| rs11540166 | NP_006089 | S | L | SL | possibly damaging |
| rs11540167 | NP_006089 | I | V | IV | benign            |
| rs11540172 | NP_006089 | D | Y | DY | probably damaging |
| rs11540177 | NP_006089 | I | T | IT | benign            |
| rs11540181 | NP_006089 | A | G | AG | possibly damaging |
| rs11540186 | NP_006089 | V | E | VE | probably damaging |
| rs11540189 | NP_006089 | G | R | GR | probably damaging |
| rs11540191 | NP_006089 | T | A | TA | benign            |
| rs11540192 | NP_006089 | F | L | FL | probably damaging |
| rs11540195 | NP_006089 | C | Y | CY | probably damaging |
| rs11540199 | NP_006089 | T | A | TA | benign            |
| rs11540205 | NP_114412 | R | Q | RQ | possibly damaging |
| rs11540206 | NP_110381 | G | C | GC | probably damaging |
| rs11540212 | NP_110381 | E | G | EG | probably damaging |
| rs11540212 | NP_954630 | E | G | EG | probably damaging |
| rs11540221 | NP_653185 | Q | L | QL | possibly damaging |
| rs11540255 | NP_001013 | E | G | EG | probably damaging |
| rs11540273 | XP_059972 | R | C | RC | probably damaging |
| rs11540279 | NP_060720 | P | R | PR | possibly damaging |
| rs11540304 | NP_003137 | E | Q | EQ | benign            |
| rs11540332 | NP_116186 | A | V | AV | benign            |

|            |           |   |   |    |                   |
|------------|-----------|---|---|----|-------------------|
| rs11540337 | NP_073610 | S | P | SP | benign            |
| rs11540348 | NP_203698 | N | D | ND | benign            |
| rs11540348 | NP_001777 | N | D | ND | benign            |
| rs11540349 | NP_056480 | P | S | PS | benign            |
| rs11540352 | NP_056480 | H | R | HR | probably damaging |
| rs11540389 | NP_057388 | I | N | IN | probably damaging |
| rs11540394 | NP_057388 | P | L | PL | probably damaging |
| rs11540397 | NP_057388 | M | I | MI | benign            |
| rs11540428 | NP_000143 | G | R | GR | possibly damaging |
| rs11540429 | NP_000143 | G | E | GE | benign            |
| rs11540436 | NP_113651 | P | S | PS | probably damaging |
| rs11540444 | NP_003898 | A | S | AS | benign            |
| rs11540462 | NP_004901 | E | D | ED | benign            |
| rs11540463 | NP_000982 | R | C | RC | probably damaging |
| rs11540468 | NP_000982 | P | R | PR | possibly damaging |
| rs11540473 | NP_000982 | G | S | GS | possibly damaging |
| rs11540474 | NP_115709 | E | K | EK | benign            |
| rs11540475 | NP_115709 | R | G | RG | probably damaging |
| rs11540480 | NP_004732 | P | R | PR | probably damaging |
| rs11540481 | NP_004732 | K | E | KE | benign            |
| rs11540483 | NP_006015 | L | I | LI | benign            |
| rs11540484 | NP_006015 | P | T | PT | possibly damaging |
| rs11540496 | NP_006750 | W | L | WL | probably damaging |
| rs11540504 | NP_056298 | M | I | MI | possibly damaging |
| rs11540507 | NP_002244 | P | A | PA | probably damaging |
| rs11540513 | NP_003360 | A | T | AT | benign            |
| rs11540542 | NP_064584 | P | T | PT | benign            |
| rs11540543 | NP_064584 | P | T | PT | possibly damaging |
| rs11540544 | NP_057731 | G | R | GR | probably damaging |
| rs11540558 | NP_057494 | S | P | SP | possibly damaging |
| rs11540596 | NP_005380 | H | N | HN | probably damaging |
| rs11540602 | NP_005380 | A | S | AS | benign            |
| rs11540603 | NP_005380 | A | V | AV | possibly damaging |
| rs11540607 | NP_005635 | F | S | FS | probably damaging |
| rs11540622 | NP_071903 | R | S | RS | probably damaging |
| rs11540636 | NP_000839 | F | S | FS | probably damaging |
| rs11540637 | NP_006286 | A | V | AV | benign            |
| rs11540644 | XP_208300 | Q | H | QH | benign            |
| rs11540648 | NP_057336 | P | R | PR | probably damaging |
| rs11540652 | NP_000537 | R | Q | RQ | probably damaging |
| rs11540654 | NP_000537 | R | L | RL | probably damaging |
| rs11540664 | NP_114155 | A | T | AT | benign            |
| rs11540674 | NP_000932 | E | K | EK | benign            |
| rs11540688 | NP_002204 | L | F | LF | possibly damaging |
| rs11540700 | NP_006136 | T | R | TR | benign            |
| rs11540711 | NP_055859 | G | V | GV | probably damaging |

|            |           |   |   |    |                   |
|------------|-----------|---|---|----|-------------------|
| rs11540715 | NP_057251 | F | S | FS | possibly damaging |
| rs11540720 | NP_001058 | A | S | AS | benign            |
| rs11540721 | NP_073598 | K | Q | KQ | benign            |
| rs11540734 | NP_110438 | A | V | AV | benign            |
| rs11540746 | NP_003453 | A | V | AV | benign            |
| rs11540755 | NP_060383 | R | H | RH | possibly damaging |
| rs11540801 | NP_116120 | A | S | AS | benign            |
| rs11540803 | NP_775656 | L | V | LV | benign            |
| rs11540803 | NP_002596 | L | V | LV | benign            |
| rs11540811 | NP_004981 | D | Y | DY | probably damaging |
| rs11540819 | NP_877416 | P | Q | PQ | possibly damaging |
| rs11540819 | NP_002484 | P | Q | PQ | possibly damaging |
| rs11540826 | NP_002256 | A | V | AV | benign            |
| rs11540829 | NP_000960 | A | V | AV | benign            |
| rs11540832 | NP_000960 | Y | C | YC | possibly damaging |
| rs11540836 | NP_000960 | F | L | FL | probably damaging |
| rs11540843 | NP_000960 | D | G | DG | benign            |
| rs11540857 | NP_009131 | V | A | VA | benign            |
| rs11540857 | NP_658913 | V | A | VA | benign            |
| rs11540857 | NP_006729 | V | A | VA | benign            |
| rs11540864 | NP_057660 | H | R | HR | probably damaging |
| rs11540878 | NP_062559 | L | I | LI | benign            |
| rs11540890 | NP_003266 | E | K | EK | benign            |
| rs11540895 | NP_115725 | Y | H | YH | possibly damaging |
| rs11540898 | NP_001904 | I | V | IV | benign            |
| rs11540898 | NP_852477 | I | V | IV | benign            |
| rs11540906 | NP_899195 | G | C | GC | probably damaging |
| rs11540906 | NP_109598 | G | C | GC | probably damaging |
| rs11540925 | NP_062565 | D | Y | DY | probably damaging |
| rs11540944 | NP_000692 | D | H | DH | benign            |
| rs11540945 | NP_000692 | L | R | LR | possibly damaging |
| rs11540949 | NP_000692 | R | L | RL | benign            |
| rs11540967 | NP_000111 | A | T | AT | benign            |
| rs11540972 | XP_044461 | V | I | VI | benign            |
| rs11540974 | NP_066977 | P | A | PA | benign            |
| rs11540974 | NP_478059 | P | A | PA | benign            |
| rs11540980 | NP_060515 | A | T | AT | benign            |
| rs11540981 | NP_060934 | A | T | AT | benign            |
| rs11540993 | NP_057185 | H | Y | HY | probably damaging |
| rs11541000 | NP_055976 | D | G | DG | possibly damaging |
| rs11541002 | NP_055976 | L | V | LV | benign            |
| rs11541003 | NP_443076 | R | C | RC | probably damaging |
| rs11541009 | NP_004606 | P | H | PH | probably damaging |
| rs11541016 | NP_002410 | P | L | PL | probably damaging |
| rs11541017 | NP_115990 | A | V | AV | benign            |
| rs11541044 | NP_631946 | Y | S | YS | probably damaging |



|            |           |   |   |    |                   |
|------------|-----------|---|---|----|-------------------|
| rs11541051 | NP_002222 | E | D | ED | benign            |
| rs11541055 | NP_055296 | G | E | GE | probably damaging |
| rs11541067 | NP_004740 | A | V | AV | benign            |
| rs11541067 | NP_954573 | A | V | AV | benign            |
| rs11541068 | NP_004740 | P | S | PS | possibly damaging |
| rs11541070 | NP_004740 | S | F | SF | possibly damaging |
| rs11541075 | NP_002755 | V | A | VA | possibly damaging |
| rs11541090 | NP_004102 | P | L | PL | probably damaging |
| rs11541102 | NP_006422 | V | F | VF | possibly damaging |
| rs11541103 | NP_006422 | N | S | NS | benign            |
| rs11541104 | NP_006422 | G | R | GR | benign            |
| rs11541118 | NP_056457 | R | C | RC | probably damaging |
| rs11541129 | NP_064544 | S | N | SN | benign            |
| rs11541139 | NP_060315 | D | E | DE | benign            |
| rs11541148 | NP_005866 | M | V | MV | probably damaging |
| rs11541154 | XP_375812 | K | E | KE | benign            |
| rs11541159 | NP_059132 | M | V | MV | benign            |
| rs11541167 | NP_478067 | P | H | PH | possibly damaging |
| rs11541179 | NP_114428 | R | C | RC | possibly damaging |
| rs11541183 | NP_004955 | F | S | FS | probably damaging |
| rs11541185 | NP_004955 | H | N | HN | probably damaging |
| rs11541187 | NP_003648 | Q | L | QL | possibly damaging |
| rs11541195 | NP_067065 | P | T | PT | probably damaging |
| rs11541197 | NP_067065 | A | T | AT | benign            |
| rs11541200 | NP_954637 | W | R | WR | probably damaging |
| rs11541208 | NP_001704 | P | Q | PQ | probably damaging |
| rs11541209 | NP_001166 | Q | H | QH | possibly damaging |
| rs11541211 | NP_001166 | S | I | SI | benign            |
| rs11541226 | NP_689552 | R | Q | RQ | benign            |
| rs11541234 | NP_002991 | T | I | TI | benign            |
| rs11541240 | NP_543012 | S | C | SC | benign            |
| rs11541242 | NP_001136 | L | P | LP | probably damaging |
| rs11541250 | NP_000849 | H | Q | HQ | probably damaging |
| rs11541255 | XP_497892 | D | G | DG | possibly damaging |
| rs11541257 | NP_056352 | P | H | PH | benign            |
| rs11541263 | NP_001447 | S | T | ST | benign            |
| rs11541264 | NP_001447 | Q | R | QR | benign            |
| rs11541270 | NP_874368 | P | R | PR | possibly damaging |
| rs11541270 | NP_874369 | P | R | PR | possibly damaging |
| rs11541270 | NP_006379 | P | R | PR | possibly damaging |
| rs11541271 | NP_874368 | P | T | PT | benign            |
| rs11541271 | NP_874369 | P | T | PT | probably damaging |
| rs11541271 | NP_006379 | P | T | PT | probably damaging |
| rs11541280 | NP_005666 | W | R | WR | benign            |
| rs11541284 | NP_150282 | A | G | AG | benign            |
| rs11541285 | NP_150282 | Q | K | QK | possibly damaging |

|            |           |   |   |    |                   |
|------------|-----------|---|---|----|-------------------|
| rs11541285 | NP_005666 | Q | K | QK | possibly damaging |
| rs11541286 | NP_659419 | K | R | KR | benign            |
| rs11541325 | NP_076436 | R | Q | RQ | benign            |
| rs11541350 | NP_004031 | V | F | VF | probably damaging |
| rs11541366 | NP_006393 | A | V | AV | benign            |
| rs11541367 | NP_006393 | D | Y | DY | probably damaging |
| rs11541402 | NP_004830 | N | K | NK | benign            |
| rs11541402 | NP_955363 | N | K | NK | benign            |
| rs11541402 | NP_955364 | N | K | NK | benign            |
| rs11541403 | NP_116164 | L | Q | LQ | possibly damaging |
| rs11541412 | NP_031378 | L | P | LP | probably damaging |
| rs11541424 | NP_036313 | H | Y | HY | possibly damaging |
| rs11541430 | NP_004309 | S | T | ST | benign            |
| rs11541430 | NP_115855 | S | T | ST | benign            |
| rs11541434 | NP_015565 | Q | R | QR | benign            |
| rs11541435 | NP_777358 | E | G | EG | probably damaging |
| rs11541435 | NP_004126 | E | G | EG | probably damaging |
| rs11541439 | NP_612452 | G | C | GC | probably damaging |
| rs11541443 | NP_001176 | R | G | RG | possibly damaging |
| rs11541444 | NP_036220 | P | H | PH | probably damaging |
| rs11541446 | NP_002854 | A | T | AT | probably damaging |
| rs11541459 | NP_057213 | S | W | SW | possibly damaging |
| rs11541464 | NP_009204 | G | S | GS | possibly damaging |
| rs11541474 | NP_001907 | H | R | HR | probably damaging |
| rs11541492 | NP_071413 | G | S | GS | benign            |
| rs11541500 | NP_003096 | A | E | AE | benign            |
| rs11541503 | NP_060687 | A | V | AV | benign            |
| rs11541504 | NP_060687 | F | L | FL | possibly damaging |
| rs11541509 | NP_219479 | Q | H | QH | possibly damaging |
| rs11541519 | NP_057141 | L | P | LP | benign            |
| rs11541531 | NP_006730 | R | G | RG | possibly damaging |
| rs11541533 | NP_006730 | Q | R | QR | possibly damaging |
| rs11541539 | NP_077001 | G | R | GR | benign            |
| rs11541541 | NP_001701 | K | R | KR | benign            |
| rs11541551 | NP_060300 | G | V | GV | probably damaging |
| rs11541556 | NP_001649 | M | I | MI | benign            |
| rs11541562 | NP_001649 | L | P | LP | probably damaging |
| rs11541563 | NP_002721 | G | V | GV | probably damaging |
| rs11541563 | NP_997401 | G | V | GV | probably damaging |
| rs11541568 | NP_000282 | M | I | MI | benign            |
| rs11541572 | NP_000282 | V | A | VA | benign            |
| rs11541574 | NP_000282 | S | C | SC | benign            |
| rs11541588 | NP_067053 | S | C | SC | benign            |
| rs11541588 | NP_733751 | S | C | SC | benign            |
| rs11541591 | NP_002056 | I | T | IT | benign            |
| rs11541598 | NP_060476 | G | W | GW | possibly damaging |

|            |           |   |   |    |                   |
|------------|-----------|---|---|----|-------------------|
| rs11541604 | NP_055331 | S | I | SI | benign            |
| rs11541607 | NP_004167 | L | F | LF | benign            |
| rs11541608 | NP_004167 | S | F | SF | possibly damaging |
| rs11541613 | NP_001001 | Q | H | QH | benign            |
| rs11541614 | NP_001001 | P | L | PL | probably damaging |
| rs11541618 | NP_001001 | P | S | PS | benign            |
| rs11541628 | NP_057295 | A | S | AS | benign            |
| rs11541628 | NP_055748 | A | S | AS | benign            |
| rs11541635 | NP_004636 | K | E | KE | benign            |
| rs11541653 | NP_060827 | R | H | RH | benign            |
| rs11541654 | NP_002305 | L | I | LI | benign            |
| rs11541656 | NP_002305 | R | Q | RQ | benign            |
| rs11541658 | NP_002817 | H | R | HR | benign            |
| rs11541660 | NP_061908 | N | I | NI | possibly damaging |
| rs11541661 | NP_872607 | F | L | FL | probably damaging |
| rs11541661 | NP_003332 | F | L | FL | probably damaging |
| rs11541666 | NP_006318 | E | Q | EQ | benign            |
| rs11541675 | XP_032996 | E | V | EV | possibly damaging |
| rs11541677 | XP_032996 | L | V | LV | benign            |
| rs11541683 | NP_116784 | A | S | AS | benign            |
| rs11541747 | NP_055427 | Y | H | YH | possibly damaging |
| rs11541753 | NP_998811 | P | L | PL | benign            |
| rs11541762 | NP_002803 | R | H | RH | benign            |
| rs11541767 | NP_008955 | M | I | MI | benign            |
| rs11541784 | NP_000362 | S | P | SP | possibly damaging |
| rs11541785 | NP_000362 | P | L | PL | probably damaging |
| rs11541790 | NP_000362 | P | S | PS | probably damaging |
| rs11541793 | NP_000362 | P | H | PH | benign            |
| rs11541795 | NP_000362 | A | V | AV | possibly damaging |
| rs11541798 | NP_000362 | P | H | PH | probably damaging |
| rs11541799 | NP_000362 | G | R | GR | probably damaging |
| rs11541800 | NP_000362 | S | G | SG | possibly damaging |
| rs11541812 | NP_000347 | G | R | GR | possibly damaging |
| rs11541813 | NP_776216 | P | L | PL | probably damaging |
| rs11541813 | NP_006776 | P | L | PL | probably damaging |
| rs11541814 | NP_201573 | D | Y | DY | probably damaging |
| rs11541814 | NP_005920 | D | Y | DY | probably damaging |
| rs11541815 | NP_201573 | A | V | AV | benign            |
| rs11541815 | NP_005920 | A | V | AV | benign            |
| rs11541820 | NP_078820 | S | G | SG | benign            |
| rs11541828 | NP_116329 | L | V | LV | benign            |
| rs11541833 | NP_002989 | A | P | AP | benign            |
| rs11541849 | NP_057321 | E | G | EG | possibly damaging |
| rs11541852 | NP_004517 | H | Y | HY | probably damaging |
| rs11541856 | XP_497005 | R | L | RL | probably damaging |
| rs11541859 | NP_000240 | E | Q | EQ | benign            |

|            |           |   |   |    |                   |
|------------|-----------|---|---|----|-------------------|
| rs11541874 | NP_057077 | R | Q | RQ | benign            |
| rs11541876 | NP_055118 | D | H | DH | possibly damaging |
| rs11541893 | XP_497318 | K | R | KR | benign            |
| rs11541898 | XP_497318 | A | T | AT | benign            |
| rs11541913 | NP_005118 | G | C | GC | probably damaging |
| rs11541926 | NP_004037 | K | R | KR | benign            |
| rs11541928 | NP_004037 | F | L | FL | benign            |
| rs11541931 | NP_004037 | I | F | IF | probably damaging |
| rs11541932 | NP_004037 | L | F | LF | benign            |
| rs11541933 | NP_004037 | S | F | SF | benign            |
| rs11541939 | NP_004037 | L | I | LI | benign            |
| rs11541942 | NP_000223 | R | S | RS | possibly damaging |
| rs11541943 | NP_000223 | T | A | TA | benign            |
| rs11541944 | NP_000223 | E | G | EG | possibly damaging |
| rs11541952 | NP_085053 | K | R | KR | benign            |
| rs11541956 | NP_055410 | P | L | PL | probably damaging |
| rs11541959 | NP_000365 | K | E | KE | possibly damaging |
| rs11541962 | NP_000365 | P | L | PL | probably damaging |
| rs11541963 | NP_000365 | R | T | RT | possibly damaging |
| rs11541966 | NP_000365 | W | R | WR | benign            |
| rs11541968 | NP_005267 | A | S | AS | benign            |
| rs11541973 | NP_005304 | S | F | SF | possibly damaging |
| rs11541983 | NP_116219 | E | K | EK | benign            |
| rs11541984 | NP_116219 | A | P | AP | benign            |
| rs11541985 | NP_116219 | P | S | PS | benign            |
| rs11541993 | NP_057230 | P | H | PH | benign            |
| rs11542001 | NP_004521 | F | L | FL | possibly damaging |
| rs11542009 | XP_371614 | T | I | TI | possibly damaging |
| rs11542012 | NP_002957 | A | V | AV | benign            |
| rs11542027 | NP_000032 | S | F | SF | benign            |
| rs11542029 | NP_000032 | R | C | RC | probably damaging |
| rs11542030 | NP_000032 | Q | R | QR | benign            |
| rs11542032 | NP_000032 | E | K | EK | possibly damaging |
| rs11542034 | NP_000032 | E | G | EG | probably damaging |
| rs11542035 | NP_000032 | R | H | RH | possibly damaging |
| rs11542040 | NP_000032 | P | T | PT | probably damaging |
| rs11542041 | NP_000032 | R | S | RS | probably damaging |
| rs11542044 | NP_848927 | S | P | SP | benign            |
| rs11542062 | NP_003095 | F | S | FS | probably damaging |
| rs11542065 | NP_000228 | H | Q | HQ | probably damaging |
| rs11542066 | NP_954657 | Q | H | QH | possibly damaging |
| rs11542066 | NP_000215 | Q | H | QH | possibly damaging |
| rs11542069 | NP_000176 | L | V | LV | benign            |
| rs11542075 | NP_002958 | D | H | DH | benign            |
| rs11542093 | NP_006096 | Q | H | QH | benign            |
| rs11542104 | NP_775956 | V | A | VA | benign            |

|            |           |   |   |    |                   |
|------------|-----------|---|---|----|-------------------|
| rs11542112 | NP_116093 | W | L | WL | probably damaging |
| rs11542113 | NP_116093 | T | N | TN | benign            |
| rs11542118 | NP_116093 | A | V | AV | probably damaging |
| rs11542119 | NP_116093 | P | L | PL | possibly damaging |
| rs11542120 | NP_006000 | Q | H | QH | benign            |
| rs11542120 | NP_116093 | Q | H | QH | benign            |
| rs11542121 | NP_116093 | F | S | FS | probably damaging |
| rs11542126 | NP_068602 | E | G | EG | possibly damaging |
| rs11542127 | NP_068602 | W | S | WS | probably damaging |
| rs11542135 | NP_077022 | K | Q | KQ | benign            |
| rs11542139 | NP_004707 | A | T | AT | benign            |
| rs11542141 | NP_789839 | L | V | LV | benign            |
| rs11542141 | NP_005780 | L | V | LV | benign            |
| rs11542146 | NP_004379 | Q | L | QL | probably damaging |
| rs11542154 | NP_653168 | P | S | PS | benign            |
| rs11542162 | NP_689947 | T | A | TA | benign            |
| rs11542164 | NP_689947 | P | H | PH | probably damaging |
| rs11542186 | NP_570896 | D | Y | DY | probably damaging |
| rs11542186 | NP_006741 | D | Y | DY | probably damaging |
| rs11542215 | NP_005070 | K | R | KR | benign            |
| rs11542218 | NP_006398 | L | V | LV | benign            |
| rs11542229 | NP_001211 | E | D | ED | benign            |
| rs11542229 | NP_742075 | E | D | ED | benign            |
| rs11542229 | NP_742076 | E | D | ED | benign            |
| rs11542229 | NP_742077 | E | D | ED | benign            |
| rs11542229 | NP_742078 | E | D | ED | benign            |
| rs11542229 | NP_742079 | E | D | ED | benign            |
| rs11542229 | NP_742080 | E | D | ED | benign            |
| rs11542229 | NP_742081 | E | D | ED | benign            |
| rs11542258 | NP_003312 | L | V | LV | benign            |
| rs11542259 | NP_003312 | M | I | MI | probably damaging |
| rs11542261 | NP_003312 | R | C | RC | probably damaging |
| rs11542276 | NP_009178 | S | F | SF | benign            |
| rs11542276 | NP_542117 | S | F | SF | benign            |
| rs11542279 | NP_579917 | L | R | LR | possibly damaging |
| rs11542279 | NP_579922 | L | R | LR | possibly damaging |
| rs11542279 | NP_579919 | L | R | LR | possibly damaging |
| rs11542280 | NP_579917 | N | S | NS | benign            |
| rs11542280 | NP_579922 | N | S | NS | benign            |
| rs11542288 | NP_112486 | P | T | PT | probably damaging |
| rs11542307 | NP_006263 | K | N | KN | benign            |
| rs11542309 | NP_006263 | F | L | FL | probably damaging |
| rs11542317 | NP_002158 | S | A | SA | benign            |
| rs11542322 | NP_057347 | C | R | CR | probably damaging |
| rs11542339 | NP_872425 | A | V | AV | benign            |
| rs11542345 | NP_008854 | F | L | FL | probably damaging |

|            |           |   |   |    |                   |
|------------|-----------|---|---|----|-------------------|
| rs11542354 | NP_000090 | G | A | GA | benign            |
| rs11542355 | NP_000090 | R | G | RG | probably damaging |
| rs11542360 | NP_000090 | R | H | RH | possibly damaging |
| rs11542364 | NP_000090 | R | S | RS | probably damaging |
| rs11542366 | XP_209616 | E | G | EG | benign            |
| rs11542367 | NP_005774 | H | R | HR | benign            |
| rs11542368 | NP_005774 | F | V | FV | probably damaging |
| rs11542369 | NP_005774 | L | Q | LQ | possibly damaging |
| rs11542371 | NP_005774 | Q | R | QR | benign            |
| rs11542374 | NP_874365 | G | R | GR | possibly damaging |
| rs11542374 | NP_056171 | G | R | GR | probably damaging |
| rs11542375 | NP_037520 | P | L | PL | probably damaging |
| rs11542381 | NP_001409 | A | T | AT | benign            |
| rs11542398 | NP_000916 | Q | K | QK | possibly damaging |
| rs11542411 | NP_219484 | E | K | EK | benign            |
| rs11542413 | NP_219484 | V | I | VI | benign            |
| rs11542417 | NP_219484 | Y | C | YC | probably damaging |
| rs11542418 | NP_219484 | Y | F | YF | benign            |
| rs11542419 | NP_066918 | F | L | FL | benign            |
| rs11542435 | XP_380175 | Q | R | QR | benign            |
| rs11542435 | NP_060504 | Q | R | QR | benign            |
| rs11542439 | NP_037468 | E | G | EG | probably damaging |
| rs11542492 | NP_003109 | T | I | TI | possibly damaging |
| rs11542503 | NP_003171 | R | Q | RQ | benign            |
| rs11542510 | NP_110436 | T | M | TM | benign            |
| rs11542514 | NP_000978 | L | P | LP | probably damaging |
| rs11542516 | NP_000978 | R | L | RL | benign            |
| rs11542517 | XP_496746 | D | Y | DY | probably damaging |
| rs11542518 | XP_496746 | K | N | KN | possibly damaging |
| rs11542529 | NP_036457 | F | L | FL | probably damaging |
| rs11542539 | NP_002125 | T | A | TA | possibly damaging |
| rs11542540 | NP_002125 | K | N | KN | possibly damaging |
| rs11542546 | NP_073210 | K | E | KE | benign            |
| rs11542558 | NP_003014 | R | G | RG | probably damaging |
| rs11542565 | NP_003002 | L | F | LF | benign            |
| rs11542579 | NP_057367 | E | D | ED | benign            |
| rs11542580 | NP_003178 | Q | H | QH | possibly damaging |
| rs11542581 | NP_003178 | R | Q | RQ | benign            |
| rs11542584 | NP_115758 | D | H | DH | benign            |
| rs11542596 | NP_056201 | V | A | VA | benign            |
| rs11542602 | NP_060707 | M | V | MV | possibly damaging |
| rs11542606 | NP_003409 | E | A | EA | possibly damaging |
| rs11542607 | NP_003409 | A | V | AV | benign            |
| rs11542610 | NP_003409 | E | V | EV | probably damaging |
| rs11542613 | NP_751918 | D | Y | DY | benign            |
| rs11542617 | NP_004764 | D | G | DG | benign            |

|            |           |   |   |    |                   |
|------------|-----------|---|---|----|-------------------|
| rs11542623 | NP_006360 | V | I | VI | benign            |
| rs11542624 | NP_006360 | L | F | LF | benign            |
| rs11542625 | NP_002756 | A | G | AG | possibly damaging |
| rs11542629 | XP_378195 | G | A | GA | benign            |
| rs11542630 | NP_000528 | P | H | PH | probably damaging |
| rs11542632 | NP_001391 | A | T | AT | benign            |
| rs11542635 | NP_003842 | Q | R | QR | benign            |
| rs11542643 | NP_001677 | K | N | KN | benign            |
| rs11542644 | NP_001677 | G | V | GV | probably damaging |
| rs11542645 | NP_001677 | P | S | PS | benign            |
| rs11542646 | NP_001677 | S | L | SL | benign            |
| rs11542649 | NP_001677 | I | V | IV | benign            |
| rs11542650 | NP_004861 | M | R | MR | possibly damaging |
| rs11542652 | NP_054768 | P | R | PR | possibly damaging |
| rs11542654 | NP_054768 | A | V | AV | benign            |
| rs11542667 | NP_006283 | L | F | LF | benign            |
| rs11542672 | NP_114415 | L | P | LP | possibly damaging |
| rs11542684 | NP_660206 | S | N | SN | benign            |
| rs11542685 | NP_660206 | W | C | WC | probably damaging |
| rs11542686 | NP_660206 | K | R | KR | benign            |
| rs11542697 | NP_060582 | L | V | LV | benign            |
| rs11542701 | NP_443134 | Q | H | QH | benign            |
| rs11542705 | NP_006133 | M | I | MI | benign            |
| rs11542708 | NP_620156 | V | A | VA | benign            |
| rs11542709 | NP_620156 | F | L | FL | possibly damaging |
| rs11542732 | NP_006007 | S | P | SP | benign            |
| rs11542738 | NP_005338 | D | Y | DY | probably damaging |
| rs11542739 | NP_005338 | V | E | VE | probably damaging |
| rs11542741 | NP_777280 | Q | H | QH | possibly damaging |
| rs11542741 | NP_008830 | Q | H | QH | possibly damaging |
| rs11542768 | NP_758859 | C | Y | CY | probably damaging |
| rs11542768 | NP_071900 | C | Y | CY | probably damaging |
| rs11542782 | NP_002618 | G | R | GR | probably damaging |
| rs11542786 | NP_055455 | S | N | SN | benign            |
| rs11542791 | NP_115765 | R | Q | RQ | possibly damaging |
| rs11542792 | NP_115765 | S | G | SG | possibly damaging |
| rs11542793 | NP_115765 | P | R | PR | probably damaging |
| rs11542801 | XP_293514 | R | P | RP | probably damaging |
| rs11542806 | NP_004742 | A | S | AS | benign            |
| rs11542810 | NP_795343 | V | F | VF | possibly damaging |
| rs11542810 | NP_055166 | V | F | VF | possibly damaging |
| rs11542811 | NP_795343 | R | Q | RQ | benign            |
| rs11542811 | NP_055166 | R | Q | RQ | benign            |
| rs11542828 | XP_372448 | G | C | GC | probably damaging |
| rs11542836 | NP_694546 | A | V | AV | benign            |
| rs11542836 | NP_006494 | A | V | AV | benign            |

|            |           |   |   |    |                   |
|------------|-----------|---|---|----|-------------------|
| rs11542842 | NP_694546 | F | L | FL | benign            |
| rs11542842 | NP_006494 | F | L | FL | benign            |
| rs11542856 | NP_000794 | K | E | KE | possibly damaging |
| rs11542862 | NP_476500 | N | S | NS | benign            |
| rs11542868 | NP_075391 | E | G | EG | possibly damaging |
| rs11542876 | NP_001771 | F | L | FL | possibly damaging |
| rs11542891 | NP_065177 | P | R | PR | probably damaging |
| rs11542892 | NP_065177 | P | R | PR | probably damaging |
| rs11542905 | NP_778239 | G | S | GS | benign            |
| rs11542905 | NP_778243 | G | S | GS | benign            |
| rs11542907 | NP_008909 | C | S | CS | probably damaging |
| rs11542909 | NP_008909 | D | N | DN | benign            |
| rs11542927 | NP_055528 | R | W | RW | probably damaging |
| rs11542929 | NP_055528 | L | I | LI | benign            |
| rs11542938 | NP_859056 | V | A | VA | benign            |
| rs11542940 | NP_006039 | P | T | PT | probably damaging |
| rs11542951 | NP_076943 | A | P | AP | benign            |
| rs11542952 | NP_068747 | A | V | AV | benign            |
| rs11542976 | NP_550440 | S | C | SC | benign            |
| rs11542976 | NP_550438 | S | C | SC | benign            |
| rs11542980 | NP_060347 | D | Y | DY | probably damaging |
| rs11542982 | NP_061902 | P | Q | PQ | probably damaging |
| rs11542982 | NP_112601 | P | Q | PQ | probably damaging |
| rs11542995 | NP_116288 | S | R | SR | benign            |
| rs11542995 | NP_996889 | S | R | SR | possibly damaging |
| rs11543008 | NP_003148 | N | D | ND | benign            |
| rs11543017 | NP_000524 | P | T | PT | probably damaging |
| rs11543017 | NP_955772 | P | T | PT | probably damaging |
| rs11543022 | NP_000524 | P | R | PR | probably damaging |
| rs11543022 | NP_955772 | P | R | PR | probably damaging |
| rs11543023 | NP_000524 | V | I | VI | benign            |
| rs11543023 | NP_955772 | V | I | VI | benign            |
| rs11543024 | NP_000524 | E | D | ED | benign            |
| rs11543024 | NP_955772 | E | D | ED | possibly damaging |
| rs11543029 | NP_004238 | D | G | DG | benign            |
| rs11543031 | XP_374983 | S | I | SI | benign            |
| rs11543032 | NP_061943 | G | V | GV | benign            |
| rs11543043 | NP_037460 | M | I | MI | possibly damaging |
| rs11543046 | NP_808907 | F | C | FC | probably damaging |
| rs11543046 | NP_002697 | F | C | FC | probably damaging |
| rs11543047 | NP_057174 | F | L | FL | possibly damaging |
| rs11543050 | NP_057174 | R | S | RS | possibly damaging |
| rs11543061 | NP_055902 | L | M | LM | benign            |
| rs11543067 | NP_055151 | V | A | VA | possibly damaging |
| rs11543075 | NP_002943 | C | R | CR | probably damaging |
| rs11543132 | NP_005587 | G | A | GA | possibly damaging |



|            |           |   |   |    |                   |
|------------|-----------|---|---|----|-------------------|
| rs11543166 | NP_004210 | A | V | AV | benign            |
| rs11543167 | NP_066280 | P | S | PS | probably damaging |
| rs11543168 | NP_006598 | S | G | SG | benign            |
| rs11543180 | NP_006677 | R | G | RG | possibly damaging |
| rs11543181 | NP_006677 | A | T | AT | benign            |
| rs11543192 | NP_000349 | I | V | IV | benign            |
| rs11543204 | XP_496443 | F | S | FS | possibly damaging |
| rs11543204 | NP_055580 | F | S | FS | possibly damaging |
| rs11543211 | NP_002796 | R | W | RW | probably damaging |
| rs11543215 | NP_149438 | D | N | DN | benign            |
| rs11543215 | NP_904319 | D | N | DN | benign            |
| rs11543215 | NP_904320 | D | N | DN | benign            |
| rs11543225 | XP_035572 | R | G | RG | probably damaging |
| rs11543239 | NP_690908 | P | L | PL | benign            |
| rs11543240 | NP_690908 | F | L | FL | possibly damaging |
| rs11543242 | NP_690908 | E | Q | EQ | benign            |
| rs11543243 | NP_690908 | K | M | KM | possibly damaging |
| rs11543244 | NP_690908 | V | I | VI | benign            |
| rs11543246 | NP_690908 | D | Y | DY | probably damaging |
| rs11543249 | NP_055488 | N | K | NK | possibly damaging |
| rs11543250 | NP_055488 | S | I | SI | possibly damaging |
| rs11543258 | NP_653177 | P | H | PH | probably damaging |
| rs11543261 | NP_612366 | R | S | RS | benign            |
| rs11543264 | NP_054770 | A | V | AV | benign            |
| rs11543266 | NP_054770 | C | R | CR | possibly damaging |
| rs11543303 | NP_076983 | S | F | SF | possibly damaging |
| rs11543322 | NP_542165 | V | L | VL | benign            |
| rs11543334 | NP_001007 | K | E | KE | possibly damaging |
| rs11543338 | XP_495885 | A | P | AP | possibly damaging |
| rs11543347 | NP_003118 | A | V | AV | benign            |
| rs11543349 | NP_031372 | G | R | GR | possibly damaging |
| rs11543350 | NP_031372 | S | T | ST | benign            |
| rs11543352 | NP_031372 | A | T | AT | benign            |
| rs11543359 | NP_056937 | L | F | LF | benign            |
| rs11543582 | NP_116249 | A | G | AG | benign            |
| rs11543848 | NP_958441 | R | K | RK | benign            |
| rs11543848 | NP_005219 | R | K | RK | benign            |
| rs11543848 | NP_958439 | R | K | RK | possibly damaging |
| rs11543905 | NP_004163 | S | R | SR | benign            |
| rs11543934 | NP_004422 | P | T | PT | probably damaging |
| rs11543939 | NP_644810 | S | I | SI | possibly damaging |
| rs11543944 | NP_003394 | Y | C | YC | benign            |
| rs11543947 | NP_002788 | R | C | RC | possibly damaging |
| rs11543966 | NP_000766 | P | H | PH | probably damaging |
| rs11543976 | NP_003741 | G | E | GE | probably damaging |
| rs11543985 | NP_037497 | L | I | LI | benign            |

|            |           |   |   |    |                   |
|------------|-----------|---|---|----|-------------------|
| rs11543992 | NP_004896 | A | V | AV | benign            |
| rs11544004 | NP_065727 | S | Y | SY | possibly damaging |
| rs11544011 | NP_997646 | D | Y | DY | probably damaging |
| rs11544015 | NP_001004 | R | S | RS | benign            |
| rs11544021 | NP_001004 | H | L | HL | probably damaging |
| rs11544022 | NP_001004 | Q | R | QR | possibly damaging |
| rs11544023 | NP_001004 | S | F | SF | benign            |
| rs11544035 | NP_001004 | F | S | FS | probably damaging |
| rs11544039 | NP_064553 | A | V | AV | benign            |
| rs11544041 | NP_056535 | S | G | SG | benign            |
| rs11544048 | NP_059998 | N | H | NH | benign            |
| rs11544054 | NP_003737 | M | L | ML | possibly damaging |
| rs11544061 | NP_003737 | L | P | LP | probably damaging |
| rs11544064 | NP_853551 | K | E | KE | benign            |
| rs11544066 | NP_599030 | N | S | NS | benign            |
| rs11544074 | NP_001563 | R | C | RC | possibly damaging |
| rs11544074 | NP_004020 | R | C | RC | probably damaging |
| rs11544074 | NP_004021 | R | C | RC | probably damaging |
| rs11544074 | NP_004022 | R | C | RC | probably damaging |
| rs11544078 | NP_056050 | T | P | TP | benign            |
| rs11544092 | NP_005783 | T | I | TI | benign            |
| rs11544133 | NP_056250 | M | V | MV | benign            |
| rs11544133 | NP_904355 | M | V | MV | benign            |
| rs11544135 | NP_612496 | L | M | LM | benign            |
| rs11544137 | NP_003959 | M | V | MV | benign            |
| rs11544137 | NP_937838 | M | V | MV | benign            |
| rs11544137 | NP_937840 | M | V | MV | benign            |
| rs11544140 | NP_005197 | H | R | HR | probably damaging |
| rs11544140 | NP_058431 | H | R | HR | probably damaging |
| rs11544145 | NP_006404 | G | D | GD | possibly damaging |
| rs11544146 | NP_722540 | I | R | IR | benign            |
| rs11544146 | NP_002608 | I | R | IR | benign            |
| rs11544160 | XP_496823 | E | K | EK | benign            |
| rs11544161 | XP_496823 | F | L | FL | benign            |
| rs11544163 | NP_647539 | R | S | RS | probably damaging |
| rs11544163 | NP_003395 | R | S | RS | probably damaging |
| rs11544169 | NP_783163 | N | S | NS | benign            |
| rs11544173 | NP_004282 | Q | K | QK | benign            |
| rs11544178 | NP_031389 | P | L | PL | probably damaging |
| rs11544180 | NP_031389 | R | C | RC | probably damaging |
| rs11544184 | NP_031389 | E | D | ED | benign            |
| rs11544185 | NP_031389 | G | V | GV | probably damaging |
| rs11544189 | NP_057319 | K | E | KE | benign            |
| rs11544191 | NP_057319 | T | A | TA | benign            |
| rs11544196 | NP_001775 | T | I | TI | possibly damaging |
| rs11544196 | NP_510966 | T | I | TI | possibly damaging |

|            |           |   |   |    |                   |
|------------|-----------|---|---|----|-------------------|
| rs11544205 | NP_597994 | A | S | AS | benign            |
| rs11544205 | NP_002866 | A | S | AS | benign            |
| rs11544207 | NP_006511 | Q | E | QE | benign            |
| rs11544224 | NP_009038 | Q | K | QK | possibly damaging |
| rs11544242 | NP_872617 | D | H | DH | benign            |
| rs11544242 | NP_006218 | D | H | DH | benign            |
| rs11544245 | NP_872617 | E | V | EV | benign            |
| rs11544245 | NP_006218 | E | V | EV | possibly damaging |
| rs11544246 | NP_872617 | H | R | HR | probably damaging |
| rs11544246 | NP_006218 | H | R | HR | probably damaging |
| rs11544257 | NP_003363 | P | T | PT | probably damaging |
| rs11544260 | NP_003363 | P | H | PH | probably damaging |
| rs11544263 | NP_003363 | D | V | DV | possibly damaging |
| rs11544267 | NP_065157 | P | Q | PQ | benign            |
| rs11544268 | NP_065157 | Y | C | YC | probably damaging |
| rs11544274 | NP_000980 | V | F | VF | benign            |
| rs11544279 | NP_006699 | P | H | PH | probably damaging |
| rs11544283 | NP_006699 | Y | C | YC | probably damaging |
| rs11544298 | NP_542131 | P | L | PL | probably damaging |
| rs11544304 | NP_000657 | D | E | DE | benign            |
| rs11544326 | NP_003671 | M | I | MI | probably damaging |
| rs11544327 | NP_003671 | K | T | KT | possibly damaging |
| rs11544331 | NP_001496 | P | L | PL | benign            |
| rs11544340 | NP_061135 | A | D | AD | benign            |
| rs11544344 | NP_932342 | G | D | GD | possibly damaging |
| rs11544346 | NP_001503 | V | A | VA | benign            |
| rs11544355 | NP_064511 | R | C | RC | possibly damaging |
| rs11544356 | NP_064511 | P | L | PL | probably damaging |
| rs11544361 | NP_060612 | F | C | FC | probably damaging |
| rs11544371 | NP_277050 | N | S | NS | benign            |
| rs11544372 | NP_277050 | Q | H | QH | benign            |
| rs11544379 | NP_065801 | V | F | VF | possibly damaging |
| rs11544382 | NP_065801 | M | T | MT | probably damaging |
| rs11544384 | NP_060924 | S | A | SA | benign            |
| rs11544406 | NP_005825 | P | H | PH | possibly damaging |
| rs11544417 | NP_987091 | S | F | SF | possibly damaging |
| rs11544419 | NP_987091 | P | L | PL | probably damaging |
| rs11544422 | NP_060335 | R | Q | RQ | benign            |
| rs11544428 | NP_003657 | P | S | PS | probably damaging |
| rs11544434 | NP_057538 | L | F | LF | benign            |
| rs11544437 | NP_057538 | P | T | PT | probably damaging |
| rs11544443 | NP_060293 | E | V | EV | possibly damaging |
| rs11544450 | NP_000772 | G | C | GC | possibly damaging |
| rs11544465 | NP_006817 | D | N | DN | benign            |
| rs11544470 | NP_002856 | Y | C | YC | probably damaging |
| rs11544484 | NP_443195 | V | I | VI | benign            |

|            |           |   |   |    |                   |
|------------|-----------|---|---|----|-------------------|
| rs11544509 | NP_001419 | M | I | MI | benign            |
| rs11544514 | NP_001419 | P | Q | PQ | probably damaging |
| rs11544519 | NP_001419 | V | L | VL | benign            |
| rs11544546 | NP_000573 | D | V | DV | benign            |
| rs11544549 | NP_000573 | H | N | HN | probably damaging |
| rs11544551 | NP_000573 | H | R | HR | probably damaging |
| rs11544553 | NP_000573 | R | C | RC | probably damaging |
| rs11544557 | NP_000620 | V | F | VF | benign            |
| rs11544566 | NP_006294 | E | K | EK | benign            |
| rs11544573 | NP_004434 | S | I | SI | probably damaging |
| rs11544587 | NP_003051 | L | P | LP | probably damaging |
| rs11544593 | NP_036228 | E | G | EG | possibly damaging |
| rs11544610 | NP_647475 | V | M | VM | benign            |
| rs11544613 | NP_054790 | G | R | GR | possibly damaging |
| rs11544621 | NP_004540 | T | A | TA | benign            |
| rs11544622 | NP_004540 | P | H | PH | probably damaging |
| rs11544625 | NP_004540 | P | S | PS | probably damaging |
| rs11544626 | NP_004540 | E | G | EG | benign            |
| rs11544627 | NP_004540 | P | T | PT | possibly damaging |
| rs11544633 | NP_000591 | L | P | LP | probably damaging |
| rs11544636 | NP_542454 | H | Y | HY | probably damaging |
| rs11544639 | NP_998776 | P | S | PS | possibly damaging |
| rs11544642 | NP_998776 | V | L | VL | benign            |
| rs11544643 | NP_005879 | F | L | FL | benign            |
| rs11544643 | NP_998776 | F | L | FL | benign            |
| rs11544644 | NP_005879 | W | L | WL | possibly damaging |
| rs11544644 | NP_998776 | W | L | WL | probably damaging |
| rs11544649 | NP_005879 | R | G | RG | possibly damaging |
| rs11544649 | NP_998776 | R | G | RG | possibly damaging |
| rs11544652 | NP_998776 | A | T | AT | benign            |
| rs11544653 | NP_005879 | A | T | AT | benign            |
| rs11544653 | NP_998776 | A | T | AT | benign            |
| rs11544655 | NP_998776 | F | L | FL | benign            |
| rs11544656 | NP_005879 | V | A | VA | benign            |
| rs11544656 | NP_998776 | V | A | VA | possibly damaging |
| rs11544657 | NP_005879 | V | M | VM | benign            |
| rs11544657 | NP_998776 | V | M | VM | benign            |
| rs11544664 | NP_997053 | D | H | DH | probably damaging |
| rs11544664 | NP_056299 | D | H | DH | probably damaging |
| rs11544678 | NP_076934 | L | V | LV | benign            |
| rs11544687 | NP_001619 | P | L | PL | probably damaging |
| rs11544695 | NP_001291 | D | Y | DY | probably damaging |
| rs11544711 | NP_113644 | I | N | IN | benign            |
| rs11544715 | NP_061142 | A | T | AT | benign            |
| rs11544715 | NP_758424 | A | T | AT | benign            |
| rs11544716 | NP_061142 | D | G | DG | benign            |

|            |           |   |   |    |                   |
|------------|-----------|---|---|----|-------------------|
| rs11544716 | NP_758424 | D | G | DG | benign            |
| rs11544735 | NP_003771 | H | R | HR | probably damaging |
| rs11544742 | NP_057327 | L | P | LP | probably damaging |
| rs11544766 | NP_659477 | S | T | ST | benign            |
| rs11544785 | NP_055755 | R | W | RW | probably damaging |
| rs11544794 | NP_115571 | A | V | AV | benign            |
| rs11544794 | NP_478063 | A | V | AV | benign            |
| rs11544794 | NP_620304 | A | V | AV | benign            |
| rs11544794 | NP_620305 | A | V | AV | benign            |
| rs11544794 | NP_003094 | A | V | AV | benign            |
| rs11544795 | NP_057422 | I | V | IV | benign            |
| rs11544801 | NP_061184 | K | R | KR | benign            |
| rs11544810 | NP_057575 | G | R | GR | possibly damaging |
| rs11544812 | NP_057575 | L | R | LR | benign            |
| rs11544814 | NP_056965 | P | Q | PQ | possibly damaging |
| rs11544814 | NP_037385 | P | Q | PQ | possibly damaging |
| rs11544815 | NP_056965 | L | M | LM | benign            |
| rs11544815 | NP_037385 | L | M | LM | benign            |
| rs11544816 | NP_056965 | E | D | ED | benign            |
| rs11544816 | NP_037385 | E | D | ED | benign            |
| rs11544821 | NP_848567 | K | E | KE | benign            |
| rs11544824 | NP_115570 | K | R | KR | benign            |
| rs11544825 | NP_848567 | R | G | RG | probably damaging |
| rs11544830 | NP_065161 | P | T | PT | possibly damaging |
| rs11544831 | NP_065161 | G | W | GW | probably damaging |
| rs11544832 | NP_065203 | P | L | PL | benign            |
| rs11544834 | XP_087225 | A | D | AD | possibly damaging |
| rs11544836 | NP_055430 | Q | H | QH | benign            |
| rs11544840 | NP_056206 | S | F | SF | benign            |
| rs11544841 | NP_056206 | A | P | AP | benign            |
| rs11544847 | NP_073580 | L | P | LP | possibly damaging |
| rs11544848 | NP_073580 | P | A | PA | possibly damaging |
| rs11544859 | NP_004795 | R | W | RW | probably damaging |
| rs11544868 | NP_004858 | M | T | MT | benign            |
| rs11544874 | XP_058719 | I | N | IN | possibly damaging |
| rs11544889 | NP_862822 | L | V | LV | benign            |
| rs11544889 | NP_006814 | L | V | LV | benign            |
| rs11544923 | NP_859048 | G | V | GV | probably damaging |
| rs11544925 | NP_859048 | I | T | IT | benign            |
| rs11544929 | NP_859048 | T | S | TS | benign            |
| rs11544930 | NP_859048 | S | L | SL | probably damaging |
| rs11544934 | NP_859048 | P | H | PH | probably damaging |
| rs11544936 | NP_859048 | S | G | SG | benign            |
| rs11544937 | NP_859048 | P | T | PT | probably damaging |
| rs11544942 | NP_663760 | Q | H | QH | benign            |
| rs11544942 | NP_680780 | Q | H | QH | benign            |

|            |           |   |   |    |                   |
|------------|-----------|---|---|----|-------------------|
| rs11544942 | NP_680781 | Q | H | QH | benign            |
| rs11544942 | NP_680782 | Q | H | QH | benign            |
| rs11544942 | NP_009176 | Q | H | QH | benign            |
| rs11544946 | XP_291335 | C | G | CG | probably damaging |
| rs11544962 | NP_001952 | F | L | FL | probably damaging |
| rs11544973 | NP_008818 | C | R | CR | benign            |
| rs11544989 | XP_378197 | V | A | VA | benign            |
| rs11544993 | NP_006420 | G | W | GW | probably damaging |
| rs11544995 | NP_006420 | V | I | VI | benign            |
| rs11544996 | XP_498152 | C | Y | CY | benign            |
| rs11545000 | NP_115633 | K | I | KI | possibly damaging |
| rs11545004 | NP_919247 | T | A | TA | benign            |
| rs11545004 | NP_079402 | T | A | TA | benign            |
| rs11545011 | NP_620551 | A | T | AT | benign            |
| rs11545011 | NP_005795 | A | T | AT | benign            |
| rs11545014 | NP_000603 | P | S | PS | benign            |
| rs11545018 | NP_001421 | S | G | SG | possibly damaging |
| rs11545035 | NP_839952 | I | V | IV | benign            |
| rs11545035 | NP_006756 | I | V | IV | benign            |
| rs11545049 | NP_542772 | G | E | GE | probably damaging |
| rs11545049 | NP_542773 | G | E | GE | probably damaging |
| rs11545050 | NP_542771 | A | V | AV | benign            |
| rs11545050 | NP_542772 | A | V | AV | benign            |
| rs11545050 | NP_542774 | A | V | AV | benign            |
| rs11545078 | NP_003869 | T | I | TI | benign            |
| rs11545079 | NP_003869 | Y | F | YF | benign            |
| rs11545082 | NP_076930 | E | K | EK | benign            |
| rs11545112 | NP_005896 | R | G | RG | probably damaging |
| rs11545113 | NP_116010 | P | H | PH | probably damaging |
| rs11545132 | NP_065095 | A | S | AS | benign            |
| rs11545137 | NP_149078 | S | P | SP | benign            |
| rs11545139 | NP_874384 | P | T | PT | benign            |
| rs11545142 | NP_002157 | S | F | SF | possibly damaging |
| rs11545148 | NP_543010 | A | T | AT | benign            |
| rs11545149 | NP_543010 | K | R | KR | benign            |
| rs11545150 | NP_543010 | I | V | IV | benign            |
| rs11545154 | NP_543010 | L | M | LM | benign            |
| rs11545163 | NP_002654 | A | T | AT | benign            |
| rs11545166 | NP_835388 | E | A | EA | benign            |
| rs11545166 | NP_075384 | E | A | EA | benign            |
| rs11545169 | NP_002799 | E | D | ED | benign            |
| rs11545170 | NP_002799 | F | L | FL | probably damaging |
| rs11545172 | NP_002799 | A | T | AT | benign            |
| rs11545173 | NP_002799 | E | K | EK | benign            |
| rs11545179 | NP_002799 | E | Q | EQ | benign            |
| rs11545180 | NP_002799 | F | L | FL | benign            |

|            |           |   |   |    |                   |
|------------|-----------|---|---|----|-------------------|
| rs11545181 | NP_002799 | R | W | RW | possibly damaging |
| rs11545182 | NP_002799 | R | L | RL | possibly damaging |
| rs11545190 | NP_963885 | F | C | FC | benign            |
| rs11545190 | NP_963886 | F | C | FC | probably damaging |
| rs11545193 | NP_963885 | W | R | WR | possibly damaging |
| rs11545193 | NP_963886 | W | R | WR | probably damaging |
| rs11545196 | XP_053074 | A | V | AV | benign            |
| rs11545197 | XP_053074 | P | L | PL | probably damaging |
| rs11545200 | NP_066548 | A | V | AV | benign            |
| rs11545228 | NP_006403 | V | F | VF | benign            |
| rs11545237 | NP_955366 | V | I | VI | benign            |
| rs11545237 | NP_003241 | V | I | VI | benign            |
| rs11545238 | NP_955366 | S | I | SI | possibly damaging |
| rs11545238 | NP_003241 | S | I | SI | possibly damaging |
| rs11545241 | NP_068593 | A | T | AT | benign            |
| rs11545246 | NP_005248 | Y | H | YH | possibly damaging |
| rs11545255 | NP_872626 | S | I | SI | benign            |
| rs11545255 | NP_004419 | S | I | SI | possibly damaging |
| rs11545265 | NP_056517 | S | T | ST | benign            |
| rs11545269 | NP_056517 | I | M | IM | benign            |
| rs11545281 | NP_997001 | D | V | DV | probably damaging |
| rs11545299 | NP_848602 | Y | F | YF | benign            |
| rs11545301 | NP_542779 | G | R | GR | benign            |
| rs11545312 | NP_057100 | V | G | VG | possibly damaging |
| rs11545314 | NP_057100 | L | R | LR | probably damaging |
| rs11545315 | NP_057100 | Q | R | QR | possibly damaging |
| rs11545323 | NP_056281 | Y | S | YS | probably damaging |
| rs11545324 | NP_853549 | N | S | NS | benign            |
| rs11545324 | NP_877572 | N | S | NS | benign            |
| rs11545324 | NP_898829 | N | S | NS | benign            |
| rs11545324 | NP_877570 | N | S | NS | benign            |
| rs11545341 | NP_696997 | Q | K | QK | possibly damaging |
| rs11545347 | NP_001814 | D | N | DN | benign            |
| rs11545349 | NP_001814 | R | H | RH | probably damaging |
| rs11545350 | NP_001814 | P | T | PT | possibly damaging |
| rs11545352 | NP_001814 | H | Y | HY | possibly damaging |
| rs11545361 | NP_060523 | T | I | TI | benign            |
| rs11545377 | NP_071383 | Q | K | QK | possibly damaging |
| rs11545379 | NP_937878 | K | N | KN | benign            |
| rs11545380 | NP_005415 | A | T | AT | benign            |
| rs11545382 | NP_115729 | G | V | GV | possibly damaging |
| rs11545399 | NP_000998 | P | S | PS | possibly damaging |
| rs11545414 | NP_000998 | Q | L | QL | probably damaging |
| rs11545422 | NP_000998 | P | H | PH | probably damaging |
| rs11545427 | NP_015556 | Q | K | QK | benign            |
| rs11545430 | NP_015556 | T | I | TI | possibly damaging |

|            |           |   |   |    |                   |
|------------|-----------|---|---|----|-------------------|
| rs11545440 | NP_057159 | Q | K | QK | benign            |
| rs11545448 | NP_000962 | K | E | KE | possibly damaging |
| rs11545461 | NP_006401 | V | F | VF | possibly damaging |
| rs11545463 | NP_000363 | K | N | KN | possibly damaging |
| rs11545464 | NP_000363 | Q | H | QH | probably damaging |
| rs11545467 | NP_110381 | E | Q | EQ | benign            |
| rs11545467 | NP_954630 | E | Q | EQ | possibly damaging |
| rs11545474 | NP_954630 | V | A | VA | possibly damaging |
| rs11545475 | NP_110381 | L | S | LS | possibly damaging |
| rs11545475 | NP_954630 | L | S | LS | possibly damaging |
| rs11545479 | NP_006187 | T | S | TS | benign            |
| rs11545483 | NP_006187 | D | E | DE | benign            |
| rs11545496 | NP_060919 | S | A | SA | benign            |
| rs11545496 | NP_065918 | S | A | SA | benign            |
| rs11545505 | XP_498426 | Y | H | YH | possibly damaging |
| rs11545528 | NP_835739 | N | S | NS | possibly damaging |
| rs11545529 | NP_005684 | I | V | IV | benign            |
| rs11545543 | NP_003371 | H | P | HP | probably damaging |
| rs11545546 | NP_003371 | A | S | AS | benign            |
| rs11545548 | NP_003371 | V | A | VA | benign            |
| rs11545550 | NP_003371 | E | Q | EQ | benign            |
| rs11545553 | NP_003371 | R | H | RH | possibly damaging |
| rs11545567 | NP_071764 | L | F | LF | benign            |
| rs11545572 | XP_371630 | V | A | VA | benign            |
| rs11545579 | NP_113643 | A | G | AG | benign            |
| rs11545580 | NP_060936 | I | T | IT | benign            |
| rs11545590 | NP_036300 | R | S | RS | probably damaging |
| rs11545591 | NP_001191 | D | G | DG | probably damaging |
| rs11545595 | NP_777358 | K | N | KN | benign            |
| rs11545595 | NP_004126 | K | N | KN | benign            |
| rs11545596 | NP_003494 | E | G | EG | possibly damaging |
| rs11545601 | NP_001272 | E | G | EG | possibly damaging |
| rs11545604 | NP_006079 | M | I | MI | benign            |
| rs11545606 | NP_006079 | P | S | PS | probably damaging |
| rs11545608 | NP_006079 | S | I | SI | probably damaging |
| rs11545619 | NP_060770 | H | R | HR | benign            |
| rs11545621 | NP_004387 | P | S | PS | benign            |
| rs11545623 | NP_004387 | G | V | GV | probably damaging |
| rs11545626 | NP_001652 | S | P | SP | possibly damaging |
| rs11545628 | NP_055099 | A | V | AV | benign            |
| rs11545640 | NP_001427 | L | F | LF | benign            |
| rs11545647 | NP_002794 | V | A | VA | possibly damaging |
| rs11545648 | NP_002794 | K | M | KM | possibly damaging |
| rs11545654 | NP_000134 | G | E | GE | probably damaging |
| rs11545655 | NP_000134 | D | H | DH | probably damaging |
| rs11545656 | NP_000134 | D | Y | DY | benign            |



|            |           |   |   |    |                   |
|------------|-----------|---|---|----|-------------------|
| rs11545659 | NP_000134 | G | C | GC | probably damaging |
| rs11545665 | NP_000109 | G | D | GD | possibly damaging |
| rs11545669 | NP_037465 | G | A | GA | benign            |
| rs11545672 | NP_003082 | S | P | SP | possibly damaging |
| rs11545672 | NP_937859 | S | P | SP | possibly damaging |
| rs11545689 | NP_852668 | V | F | VF | possibly damaging |
| rs11545689 | NP_852669 | V | F | VF | possibly damaging |
| rs11545689 | NP_057184 | V | F | VF | possibly damaging |
| rs11545690 | NP_079021 | M | R | MR | benign            |
| rs11545695 | NP_036354 | A | V | AV | benign            |
| rs11545708 | NP_001812 | M | T | MT | probably damaging |
| rs11545713 | NP_001680 | I | F | IF | probably damaging |
| rs11545714 | NP_848930 | D | G | DG | benign            |
| rs11545715 | NP_942592 | M | V | MV | benign            |
| rs11545715 | NP_115593 | M | V | MV | possibly damaging |
| rs11545725 | NP_002330 | Q | L | QL | possibly damaging |
| rs11545740 | NP_006812 | M | V | MV | probably damaging |
| rs11545745 | NP_115878 | Q | R | QR | benign            |
| rs11545747 | NP_055121 | V | A | VA | possibly damaging |
| rs11545753 | NP_909119 | D | E | DE | benign            |
| rs11545753 | NP_057537 | D | E | DE | benign            |
| rs11545758 | NP_004583 | A | S | AS | benign            |
| rs11545763 | NP_077300 | G | E | GE | possibly damaging |
| rs11545772 | NP_001395 | A | T | AT | benign            |
| rs11545777 | NP_036605 | A | V | AV | benign            |
| rs11545784 | NP_005172 | K | R | KR | benign            |
| rs11545807 | NP_444273 | V | F | VF | benign            |
| rs11545809 | NP_444273 | G | W | GW | probably damaging |
| rs11545810 | NP_444273 | L | V | LV | benign            |
| rs11545817 | NP_003801 | V | M | VM | benign            |
| rs11545831 | NP_476433 | R | Q | RQ | benign            |
| rs11545833 | NP_697021 | N | S | NS | benign            |
| rs11545833 | NP_006057 | N | S | NS | benign            |
| rs11545844 | NP_055569 | C | S | CS | possibly damaging |
| rs11545848 | NP_001668 | Q | K | QK | possibly damaging |
| rs11545849 | NP_001668 | V | M | VM | benign            |
| rs11545852 | NP_001668 | R | G | RG | probably damaging |
| rs11545862 | NP_059980 | M | V | MV | probably damaging |
| rs11545863 | NP_059980 | T | I | TI | possibly damaging |
| rs11545867 | NP_059980 | P | Q | PQ | probably damaging |
| rs11545888 | NP_005733 | P | L | PL | probably damaging |
| rs11545890 | NP_079473 | T | M | TM | possibly damaging |
| rs11545890 | NP_788275 | T | M | TM | possibly damaging |
| rs11545890 | NP_788276 | T | M | TM | possibly damaging |
| rs11545899 | NP_001630 | S | A | SA | benign            |
| rs11545902 | NP_001630 | R | G | RG | probably damaging |

|            |           |   |   |    |                   |
|------------|-----------|---|---|----|-------------------|
| rs11545917 | NP_690054 | G | V | GV | probably damaging |
| rs11545917 | NP_071364 | G | V | GV | probably damaging |
| rs11545938 | XP_497077 | S | R | SR | benign            |
| rs11545941 | NP_000296 | A | G | AG | benign            |
| rs11545942 | NP_000296 | G | R | GR | possibly damaging |
| rs11545976 | NP_004791 | P | S | PS | probably damaging |
| rs11545978 | NP_004791 | F | S | FS | possibly damaging |
| rs11545979 | NP_004791 | E | A | EA | benign            |
| rs11545980 | NP_004791 | C | R | CR | probably damaging |
| rs11545987 | NP_002257 | P | L | PL | probably damaging |
| rs11545989 | NP_002257 | P | R | PR | probably damaging |
| rs11545999 | NP_057529 | L | F | LF | benign            |
| rs11546004 | NP_075422 | H | R | HR | possibly damaging |
| rs11546004 | NP_075421 | H | R | HR | probably damaging |
| rs11546015 | NP_073557 | N | D | ND | benign            |
| rs11546018 | NP_899648 | V | A | VA | possibly damaging |
| rs11546022 | NP_009057 | P | L | PL | probably damaging |
| rs11546071 | XP_496558 | A | D | AD | benign            |
| rs11546126 | NP_000394 | Y | H | YH | benign            |
| rs11546139 | NP_003648 | V | L | VL | benign            |
| rs11546158 | NP_002286 | T | I | TI | benign            |
| rs11546163 | XP_371155 | L | F | LF | possibly damaging |
| rs11546165 | XP_371155 | D | Y | DY | probably damaging |
| rs11546169 | XP_370697 | P | L | PL | possibly damaging |
| rs11546179 | NP_055038 | S | N | SN | benign            |
| rs11546183 | NP_550435 | H | Y | HY | probably damaging |
| rs11546183 | NP_550436 | H | Y | HY | probably damaging |
| rs11546183 | NP_550434 | H | Y | HY | probably damaging |
| rs11546195 | NP_000996 | G | V | GV | benign            |
| rs11546205 | NP_000996 | F | S | FS | probably damaging |
| rs11546214 | NP_000996 | V | F | VF | possibly damaging |
| rs11546215 | XP_496667 | L | P | LP | probably damaging |
| rs11546219 | NP_000996 | G | R | GR | probably damaging |
| rs11546223 | NP_000996 | P | A | PA | possibly damaging |
| rs11546234 | XP_496667 | V | F | VF | possibly damaging |
| rs11546251 | NP_058634 | G | E | GE | possibly damaging |
| rs11546267 | NP_005753 | S | N | SN | benign            |
| rs11546271 | NP_005753 | F | L | FL | benign            |
| rs11546272 | NP_005753 | L | F | LF | benign            |
| rs11546276 | NP_005753 | E | G | EG | possibly damaging |
| rs11546278 | NP_620148 | Q | H | QH | benign            |
| rs11546280 | NP_002940 | S | P | SP | benign            |
| rs11546292 | NP_004902 | K | N | KN | benign            |
| rs11546299 | NP_620152 | R | H | RH | possibly damaging |
| rs11546303 | NP_057645 | M | R | MR | benign            |
| rs11546304 | NP_057645 | G | V | GV | benign            |

|            |           |   |   |    |                   |
|------------|-----------|---|---|----|-------------------|
| rs11546314 | NP_877954 | P | L | PL | probably damaging |
| rs11546314 | NP_115874 | P | L | PL | probably damaging |
| rs11546318 | NP_079425 | S | I | SI | benign            |
| rs11546326 | NP_000175 | W | C | WC | probably damaging |
| rs11546326 | NP_000550 | W | C | WC | probably damaging |
| rs11546332 | NP_722545 | G | V | GV | probably damaging |
| rs11546332 | NP_112579 | G | V | GV | probably damaging |
| rs11546342 | NP_001685 | G | W | GW | possibly damaging |
| rs11546344 | NP_001685 | G | R | GR | possibly damaging |
| rs11546349 | NP_004726 | N | S | NS | benign            |
| rs11546365 | NP_004918 | Y | H | YH | possibly damaging |
| rs11546368 | XP_372921 | M | I | MI | possibly damaging |
| rs11546369 | XP_372921 | T | A | TA | benign            |
| rs11546370 | XP_372921 | E | V | EV | possibly damaging |
| rs11546374 | NP_066944 | G | R | GR | benign            |
| rs11546374 | NP_001950 | G | R | GR | benign            |
| rs11546375 | NP_066944 | M | I | MI | probably damaging |
| rs11546375 | NP_001950 | M | I | MI | probably damaging |
| rs11546379 | NP_066944 | T | I | TI | possibly damaging |
| rs11546379 | NP_001950 | T | I | TI | possibly damaging |
| rs11546386 | NP_066944 | G | R | GR | benign            |
| rs11546386 | NP_001950 | G | R | GR | benign            |
| rs11546392 | NP_006279 | R | S | RS | possibly damaging |
| rs11546406 | NP_075066 | T | I | TI | possibly damaging |
| rs11546413 | NP_003498 | F | L | FL | benign            |
| rs11546418 | NP_057223 | H | N | HN | probably damaging |
| rs11546424 | NP_009129 | E | K | EK | benign            |
| rs11546426 | NP_059118 | S | G | SG | benign            |
| rs11546443 | NP_060353 | S | L | SL | possibly damaging |
| rs11546444 | NP_060353 | Q | R | QR | benign            |
| rs11546473 | NP_001646 | A | V | AV | possibly damaging |
| rs11546474 | NP_003792 | T | I | TI | possibly damaging |
| rs11546494 | XP_496725 | F | L | FL | benign            |
| rs11546495 | NP_006316 | P | H | PH | benign            |
| rs11546497 | XP_371023 | A | P | AP | possibly damaging |
| rs11546499 | NP_150254 | P | L | PL | possibly damaging |
| rs11546499 | NP_000968 | P | L | PL | possibly damaging |
| rs11546502 | XP_371023 | R | W | RW | benign            |
| rs11546505 | XP_371023 | P | S | PS | probably damaging |
| rs11546515 | NP_067027 | A | T | AT | benign            |
| rs11546517 | NP_067027 | V | L | VL | benign            |
| rs11546518 | NP_036367 | T | A | TA | benign            |
| rs11546532 | NP_057181 | A | T | AT | benign            |
| rs11546562 | NP_037471 | W | L | WL | probably damaging |
| rs11546569 | NP_001481 | S | C | SC | possibly damaging |
| rs11546602 | NP_116093 | E | G | EG | benign            |

|            |           |   |   |    |                   |
|------------|-----------|---|---|----|-------------------|
| rs11546605 | NP_116093 | N | K | NK | benign            |
| rs11546623 | NP_116093 | P | Q | PQ | probably damaging |
| rs11546628 | NP_116093 | D | G | DG | probably damaging |
| rs11546630 | XP_375500 | R | Q | RQ | benign            |
| rs11546631 | XP_375500 | R | W | RW | possibly damaging |
| rs11546634 | NP_079510 | L | P | LP | probably damaging |
| rs11546642 | NP_036335 | L | F | LF | possibly damaging |
| rs11546666 | NP_066293 | C | F | CF | benign            |
| rs11546679 | NP_078792 | G | S | GS | benign            |
| rs11546682 | XP_114618 | H | R | HR | probably damaging |
| rs11546701 | NP_068805 | P | H | PH | probably damaging |
| rs11546719 | NP_005505 | R | H | RH | benign            |
| rs11546721 | NP_005505 | R | K | RK | probably damaging |
| rs11546750 | NP_821133 | C | W | CW | probably damaging |
| rs11546751 | NP_821133 | G | D | GD | probably damaging |
| rs11546773 | NP_000961 | A | T | AT | benign            |
| rs11546776 | NP_000961 | S | P | SP | possibly damaging |
| rs11546780 | NP_000961 | A | V | AV | benign            |
| rs11546823 | XP_208887 | G | S | GS | possibly damaging |
| rs11546827 | NP_057722 | K | R | KR | benign            |
| rs11546833 | NP_075385 | P | T | PT | possibly damaging |
| rs11546842 | NP_002684 | R | C | RC | probably damaging |
| rs11546851 | NP_056277 | D | G | DG | possibly damaging |
| rs11546855 | XP_498129 | D | G | DG | probably damaging |
| rs11546863 | NP_006658 | D | G | DG | benign            |
| rs11546864 | NP_006658 | D | N | DN | benign            |
| rs11546871 | NP_003556 | P | L | PL | possibly damaging |
| rs11546873 | NP_001505 | T | S | TS | benign            |
| rs11546878 | NP_115707 | R | W | RW | possibly damaging |
| rs11546882 | NP_056241 | P | L | PL | probably damaging |
| rs11546894 | NP_001092 | A | V | AV | benign            |
| rs11546895 | NP_001092 | L | F | LF | benign            |
| rs11546898 | NP_001092 | Y | S | YS | probably damaging |
| rs11546899 | NP_001092 | P | L | PL | probably damaging |
| rs11546900 | NP_001092 | P | L | PL | possibly damaging |
| rs11546901 | NP_001092 | H | R | HR | probably damaging |
| rs11546903 | NP_001092 | G | S | GS | possibly damaging |
| rs11546904 | NP_001092 | K | E | KE | possibly damaging |
| rs11546910 | NP_001092 | P | S | PS | probably damaging |
| rs11546912 | NP_001092 | Y | C | YC | probably damaging |
| rs11546913 | NP_001092 | P | S | PS | probably damaging |
| rs11546917 | NP_001092 | S | P | SP | probably damaging |
| rs11546929 | NP_001092 | A | V | AV | benign            |
| rs11546931 | NP_001092 | V | G | VG | probably damaging |
| rs11546934 | NP_001092 | R | L | RL | probably damaging |
| rs11546937 | NP_001092 | Y | F | YF | benign            |

|            |           |   |   |    |                   |
|------------|-----------|---|---|----|-------------------|
| rs11546958 | NP_006394 | D | H | DH | possibly damaging |
| rs11546959 | NP_006394 | D | N | DN | benign            |
| rs11546967 | NP_002602 | N | H | NH | possibly damaging |
| rs11546972 | NP_005727 | R | Q | RQ | benign            |
| rs11546982 | NP_057131 | A | V | AV | benign            |
| rs11546985 | NP_004300 | H | Y | HY | probably damaging |
| rs11546987 | NP_004300 | S | I | SI | probably damaging |
| rs11546991 | NP_004300 | P | S | PS | probably damaging |
| rs11546993 | XP_371036 | G | D | GD | possibly damaging |
| rs11546995 | NP_060357 | C | S | CS | probably damaging |
| rs11546996 | NP_003112 | A | P | AP | benign            |
| rs11546997 | NP_612145 | A | T | AT | benign            |
| rs11547001 | NP_612145 | I | F | IF | benign            |
| rs11547007 | NP_000987 | F | S | FS | probably damaging |
| rs11547008 | NP_000987 | T | A | TA | benign            |
| rs11547009 | NP_000987 | H | Y | HY | probably damaging |
| rs11547019 | NP_777577 | A | P | AP | possibly damaging |
| rs11547028 | NP_002761 | A | V | AV | benign            |
| rs11547031 | NP_689797 | E | G | EG | possibly damaging |
| rs11547051 | NP_002939 | K | N | KN | possibly damaging |
| rs11547055 | NP_002939 | S | F | SF | probably damaging |
| rs11547061 | NP_463459 | L | P | LP | probably damaging |
| rs11547061 | NP_055090 | L | P | LP | probably damaging |
| rs11547062 | NP_463459 | S | R | SR | benign            |
| rs11547062 | NP_055090 | S | R | SR | benign            |
| rs11547063 | NP_463459 | P | S | PS | benign            |
| rs11547063 | NP_055090 | P | S | PS | benign            |
| rs11547071 | NP_077017 | C | S | CS | probably damaging |
| rs11547072 | NP_077017 | R | Q | RQ | benign            |
| rs11547093 | NP_066564 | E | V | EV | possibly damaging |
| rs11547095 | NP_009177 | P | Q | PQ | possibly damaging |
| rs11547101 | NP_114405 | S | Y | SY | benign            |
| rs11547118 | NP_009105 | A | G | AG | benign            |
| rs11547141 | NP_078871 | E | K | EK | possibly damaging |
| rs11547146 | NP_006267 | W | L | WL | probably damaging |
| rs11547156 | NP_006004 | V | F | VF | probably damaging |
| rs11547160 | NP_112573 | G | R | GR | benign            |
| rs11547163 | NP_001531 | S | I | SI | probably damaging |
| rs11547165 | NP_001531 | L | M | LM | benign            |
| rs11547167 | NP_001531 | E | D | ED | benign            |
| rs11547174 | NP_000665 | S | P | SP | possibly damaging |
| rs11547175 | NP_000665 | A | S | AS | benign            |
| rs11547176 | NP_000665 | R | H | RH | possibly damaging |
| rs11547177 | NP_000665 | P | H | PH | possibly damaging |
| rs11547186 | NP_064601 | D | Y | DY | probably damaging |
| rs11547195 | NP_008920 | S | N | SN | benign            |

|            |           |   |   |    |                   |
|------------|-----------|---|---|----|-------------------|
| rs11547196 | NP_003215 | W | C | WC | probably damaging |
| rs11547202 | NP_776251 | M | I | MI | benign            |
| rs11547217 | NP_066949 | A | V | AV | benign            |
| rs11547228 | NP_060404 | T | I | TI | benign            |
| rs11547231 | NP_005726 | V | A | VA | benign            |
| rs11547234 | NP_001784 | M | I | MI | probably damaging |
| rs11547235 | NP_055819 | T | A | TA | benign            |
| rs11547237 | NP_055819 | E | G | EG | probably damaging |
| rs11547238 | NP_002992 | C | S | CS | benign            |
| rs11547254 | NP_003553 | P | T | PT | benign            |
| rs11547262 | NP_037466 | V | L | VL | benign            |
| rs11547262 | NP_068806 | V | L | VL | benign            |
| rs11547273 | NP_057161 | P | T | PT | probably damaging |
| rs11547279 | NP_006755 | L | F | LF | benign            |
| rs11547283 | NP_004996 | P | L | PL | benign            |
| rs11547284 | NP_004996 | P | S | PS | benign            |
| rs11547290 | NP_006525 | Q | K | QK | benign            |
| rs11547290 | NP_858045 | Q | K | QK | benign            |
| rs11547296 | NP_208385 | P | R | PR | benign            |
| rs11547296 | NP_036307 | P | R | PR | benign            |
| rs11547298 | NP_055140 | D | Y | DY | probably damaging |
| rs11547305 | NP_973727 | V | A | VA | benign            |
| rs11547305 | NP_973724 | V | A | VA | benign            |
| rs11547305 | NP_973726 | V | A | VA | benign            |
| rs11547305 | NP_004621 | V | A | VA | benign            |
| rs11547306 | NP_973724 | S | F | SF | benign            |
| rs11547306 | NP_973727 | S | F | SF | possibly damaging |
| rs11547306 | NP_004621 | S | F | SF | possibly damaging |
| rs11547328 | NP_000066 | R | C | RC | probably damaging |
| rs11547330 | NP_003503 | P | S | PS | probably damaging |
| rs11547333 | NP_065159 | R | S | RS | benign            |
| rs11547368 | NP_002782 | A | S | AS | benign            |
| rs11547372 | NP_444274 | A | V | AV | benign            |
| rs11547375 | NP_003177 | P | R | PR | possibly damaging |
| rs11547378 | NP_931045 | A | V | AV | benign            |
| rs11547388 | NP_005315 | Q | H | QH | probably damaging |
| rs11547392 | NP_005315 | D | V | DV | probably damaging |
| rs11547395 | NP_005315 | P | R | PR | probably damaging |
| rs11547396 | NP_005315 | R | H | RH | benign            |
| rs11547397 | NP_005315 | A | G | AG | benign            |
| rs11547402 | NP_004277 | G | R | GR | possibly damaging |
| rs11547446 | NP_115612 | S | T | ST | benign            |
| rs11547455 | NP_003141 | S | F | SF | possibly damaging |
| rs11547455 | NP_644805 | S | F | SF | probably damaging |
| rs11547459 | NP_945191 | G | W | GW | probably damaging |
| rs11547459 | NP_945192 | G | W | GW | probably damaging |

|            |           |   |   |    |                   |
|------------|-----------|---|---|----|-------------------|
| rs11547463 | NP_653230 | C | R | CR | benign            |
| rs11547464 | NP_002377 | R | H | RH | probably damaging |
| rs11547467 | NP_201585 | D | Y | DY | probably damaging |
| rs11547472 | NP_003376 | G | S | GS | possibly damaging |
| rs11547480 | NP_064708 | L | R | LR | possibly damaging |
| rs11547483 | NP_057439 | M | T | MT | benign            |
| rs11547483 | NP_957518 | M | T | MT | possibly damaging |
| rs11547484 | NP_056146 | V | M | VM | benign            |
| rs11547491 | NP_006504 | A | S | AS | benign            |
| rs11547494 | NP_858062 | G | V | GV | probably damaging |
| rs11547494 | NP_858063 | G | V | GV | probably damaging |
| rs11547494 | NP_858064 | G | V | GV | probably damaging |
| rs11547494 | NP_858061 | G | V | GV | probably damaging |
| rs11547503 | NP_071895 | W | L | WL | probably damaging |
| rs11547505 | NP_057690 | R | K | RK | benign            |
| rs11547512 | NP_005339 | Q | L | QL | probably damaging |
| rs11547516 | XP_084514 | A | V | AV | possibly damaging |
| rs11547519 | NP_005339 | D | A | DA | possibly damaging |
| rs11547527 | XP_084514 | D | G | DG | probably damaging |
| rs11547532 | NP_005339 | M | I | MI | probably damaging |
| rs11547536 | XP_084514 | A | S | AS | benign            |
| rs11547537 | NP_005339 | M | I | MI | benign            |
| rs11547538 | NP_005339 | F | L | FL | benign            |
| rs11547543 | NP_005339 | M | K | MK | probably damaging |
| rs11547548 | NP_085048 | Q | K | QK | possibly damaging |
| rs11547562 | NP_004334 | K | N | KN | possibly damaging |
| rs11547563 | NP_004334 | W | G | WG | probably damaging |
| rs11547568 | NP_004334 | F | L | FL | benign            |
| rs11547569 | NP_004334 | V | M | VM | benign            |
| rs11547571 | NP_057330 | P | A | PA | possibly damaging |
| rs11547579 | NP_055629 | T | A | TA | possibly damaging |
| rs11547593 | NP_067020 | R | G | RG | benign            |
| rs11547597 | NP_057569 | E | G | EG | probably damaging |
| rs11547600 | NP_057569 | H | N | HN | probably damaging |
| rs11547609 | NP_002622 | D | N | DN | benign            |
| rs11547610 | NP_002622 | A | S | AS | benign            |
| rs11547612 | NP_065761 | P | H | PH | possibly damaging |
| rs11547613 | NP_065761 | R | G | RG | possibly damaging |
| rs11547614 | NP_065761 | P | L | PL | possibly damaging |
| rs11547615 | NP_065761 | V | I | VI | benign            |
| rs11547618 | NP_064446 | K | R | KR | benign            |
| rs11547619 | NP_064446 | C | F | CF | probably damaging |
| rs11547621 | NP_150592 | L | F | LF | benign            |
| rs11547629 | NP_588608 | Q | R | QR | possibly damaging |
| rs11547639 | NP_065438 | I | V | IV | benign            |
| rs11547647 | XP_054284 | F | L | FL | possibly damaging |

|            |           |   |   |    |                   |
|------------|-----------|---|---|----|-------------------|
| rs11547654 | NP_009172 | K | M | KM | benign            |
| rs11547660 | NP_055574 | S | R | SR | benign            |
| rs11547668 | NP_056988 | T | S | TS | benign            |
| rs11547670 | NP_056988 | K | E | KE | benign            |
| rs11547671 | NP_112191 | C | G | CG | probably damaging |
| rs11547685 | NP_005871 | R | T | RT | probably damaging |
| rs11547696 | NP_982255 | G | V | GV | probably damaging |
| rs11547696 | NP_066953 | G | V | GV | probably damaging |
| rs11547706 | NP_066953 | G | D | GD | benign            |
| rs11547706 | NP_982255 | G | D | GD | possibly damaging |
| rs11547713 | NP_982255 | P | R | PR | benign            |
| rs11547713 | NP_066953 | P | R | PR | benign            |
| rs11547730 | XP_371474 | F | L | FL | benign            |
| rs11547731 | XP_371474 | I | V | IV | benign            |
| rs11547746 | NP_000704 | R | Q | RQ | benign            |
| rs11547747 | NP_000704 | V | I | VI | benign            |
| rs11547756 | NP_057374 | A | S | AS | benign            |
| rs11547765 | NP_037511 | G | E | GE | probably damaging |
| rs11547778 | NP_057144 | S | F | SF | benign            |
| rs11547791 | NP_005846 | G | S | GS | benign            |
| rs11547798 | NP_055571 | E | Q | EQ | benign            |
| rs11547805 | NP_065228 | K | N | KN | possibly damaging |
| rs11547806 | NP_872379 | P | A | PA | possibly damaging |
| rs11547807 | XP_371078 | A | E | AE | benign            |
| rs11547809 | NP_060496 | K | N | KN | benign            |
| rs11547811 | NP_005016 | K | E | KE | benign            |
| rs11547820 | NP_004590 | R | S | RS | benign            |
| rs11547822 | NP_004590 | K | E | KE | benign            |
| rs11547823 | NP_004590 | Q | H | QH | possibly damaging |
| rs11547824 | NP_005509 | S | T | ST | possibly damaging |
| rs11547829 | NP_006144 | H | N | HN | benign            |
| rs11547830 | NP_006144 | P | H | PH | probably damaging |
| rs11547835 | NP_004222 | A | T | AT | benign            |
| rs11547836 | NP_004222 | P | T | PT | probably damaging |
| rs11547840 | NP_003747 | P | L | PL | probably damaging |
| rs11547848 | NP_060292 | E | K | EK | benign            |
| rs11547853 | NP_536858 | L | P | LP | probably damaging |
| rs11547853 | NP_536859 | L | P | LP | probably damaging |
| rs11547853 | NP_002822 | L | P | LP | probably damaging |
| rs11547859 | NP_003072 | K | R | KR | possibly damaging |
| rs11547861 | NP_003072 | D | G | DG | benign            |
| rs11547861 | NP_570824 | D | G | DG | benign            |
| rs11547873 | NP_570824 | Q | R | QR | benign            |
| rs11547873 | NP_003072 | Q | R | QR | possibly damaging |
| rs11547881 | NP_057524 | S | P | SP | benign            |
| rs11547882 | NP_057524 | P | T | PT | possibly damaging |



|            |           |   |   |    |                   |
|------------|-----------|---|---|----|-------------------|
| rs11547883 | NP_057524 | F | L | FL | benign            |
| rs11547889 | NP_002993 | R | G | RG | probably damaging |
| rs11547892 | NP_002993 | L | P | LP | benign            |
| rs11547904 | NP_000726 | R | G | RG | probably damaging |
| rs11547907 | NP_008993 | L | F | LF | benign            |
| rs11547915 | NP_443164 | V | F | VF | benign            |
| rs11547922 | NP_002291 | P | L | PL | possibly damaging |
| rs11547923 | NP_002291 | V | F | VF | possibly damaging |
| rs11547925 | NP_002291 | G | V | GV | probably damaging |
| rs11547926 | NP_002291 | P | S | PS | benign            |
| rs11547927 | NP_002291 | P | T | PT | probably damaging |
| rs11547934 | NP_665801 | H | N | HN | probably damaging |
| rs11547934 | NP_665799 | H | N | HN | probably damaging |
| rs11547950 | NP_057030 | K | E | KE | benign            |
| rs11547963 | NP_064595 | V | G | VG | possibly damaging |
| rs11547963 | NP_945119 | V | G | VG | possibly damaging |
| rs11547965 | NP_064595 | R | C | RC | possibly damaging |
| rs11547965 | NP_945119 | R | C | RC | possibly damaging |
| rs11547967 | NP_064595 | E | D | ED | benign            |
| rs11547967 | NP_945119 | E | D | ED | benign            |
| rs11547969 | NP_000958 | L | V | LV | benign            |
| rs11547974 | NP_000958 | A | V | AV | possibly damaging |
| rs11547978 | NP_000958 | T | I | TI | benign            |
| rs11547982 | NP_000958 | L | R | LR | probably damaging |
| rs11547987 | NP_000958 | K | E | KE | benign            |
| rs11547990 | NP_000958 | H | R | HR | possibly damaging |
| rs11547999 | NP_000958 | V | A | VA | benign            |
| rs11548004 | NP_000958 | I | T | IT | benign            |
| rs11548021 | NP_000958 | R | Q | RQ | possibly damaging |
| rs11548027 | NP_000958 | H | N | HN | probably damaging |
| rs11548034 | NP_061955 | G | W | GW | probably damaging |
| rs11548041 | NP_002480 | D | G | DG | possibly damaging |
| rs11548056 | NP_002406 | I | T | IT | probably damaging |
| rs11548060 | XP_291241 | T | N | TN | benign            |
| rs11548063 | XP_291241 | P | T | PT | probably damaging |
| rs11548066 | NP_006221 | L | M | LM | benign            |
| rs11548081 | NP_004346 | N | K | NK | possibly damaging |
| rs11548082 | NP_004346 | Y | C | YC | probably damaging |
| rs11548098 | NP_004692 | T | A | TA | benign            |
| rs11548112 | NP_057006 | A | T | AT | benign            |
| rs11548113 | NP_057006 | E | V | EV | probably damaging |
| rs11548114 | NP_057006 | E | G | EG | possibly damaging |
| rs11548125 | NP_002100 | A | T | AT | benign            |
| rs11548131 | NP_056455 | V | F | VF | benign            |
| rs11548133 | NP_058212 | P | T | PT | possibly damaging |
| rs11548133 | NP_058214 | P | T | PT | possibly damaging |

|            |           |   |   |    |                   |
|------------|-----------|---|---|----|-------------------|
| rs11548133 | NP_058434 | P | T | PT | possibly damaging |
| rs11548133 | NP_058436 | P | T | PT | possibly damaging |
| rs11548133 | NP_058437 | P | T | PT | possibly damaging |
| rs11548133 | NP_058438 | P | T | PT | possibly damaging |
| rs11548133 | NP_058213 | P | T | PT | probably damaging |
| rs11548133 | NP_002533 | P | T | PT | probably damaging |
| rs11548140 | NP_060085 | R | H | RH | possibly damaging |
| rs11548149 | NP_037534 | A | G | AG | possibly damaging |
| rs11548150 | NP_037534 | A | T | AT | benign            |
| rs11548166 | XP_058967 | R | G | RG | possibly damaging |
| rs11548167 | NP_115754 | V | F | VF | benign            |
| rs11548167 | NP_001951 | V | F | VF | benign            |
| rs11548168 | NP_115754 | A | V | AV | benign            |
| rs11548168 | NP_001951 | A | V | AV | benign            |
| rs11548172 | NP_006813 | L | M | LM | benign            |
| rs11548175 | NP_115914 | V | L | VL | benign            |
| rs11548176 | NP_115914 | R | W | RW | probably damaging |
| rs11548187 | NP_066991 | R | W | RW | probably damaging |
| rs11548193 | NP_001181 | R | T | RT | benign            |
| rs11548194 | NP_001181 | R | Q | RQ | possibly damaging |
| rs11548199 | NP_005989 | H | Y | HY | probably damaging |
| rs11548208 | NP_002718 | S | P | SP | benign            |
| rs11548213 | NP_002718 | N | D | ND | benign            |
| rs11548224 | NP_660286 | T | S | TS | benign            |
| rs11548226 | NP_055116 | L | V | LV | benign            |
| rs11548230 | NP_055116 | A | T | AT | possibly damaging |
| rs11548254 | NP_055932 | T | K | TK | benign            |
| rs11548256 | NP_563581 | R | H | RH | benign            |
| rs11548268 | NP_338599 | S | F | SF | possibly damaging |
| rs11548269 | NP_036377 | I | F | IF | benign            |
| rs11548275 | NP_077002 | M | T | MT | benign            |
| rs11548284 | NP_003910 | N | S | NS | benign            |
| rs11548285 | NP_003910 | R | Q | RQ | benign            |
| rs11548286 | NP_003910 | E | A | EA | benign            |
| rs11548287 | NP_115740 | F | L | FL | possibly damaging |
| rs11548289 | NP_115740 | E | G | EG | possibly damaging |
| rs11548290 | NP_002930 | V | A | VA | benign            |
| rs11548290 | NP_976318 | V | A | VA | benign            |
| rs11548290 | NP_976322 | V | A | VA | benign            |
| rs11548290 | NP_976323 | V | A | VA | benign            |
| rs11548290 | NP_976321 | V | A | VA | benign            |
| rs11548290 | NP_976320 | V | A | VA | benign            |
| rs11548290 | NP_976317 | V | A | VA | benign            |
| rs11548290 | NP_976319 | V | A | VA | benign            |
| rs11548294 | NP_001448 | I | F | IF | possibly damaging |
| rs11548295 | NP_005507 | A | V | AV | benign            |

|            |           |   |   |    |                   |
|------------|-----------|---|---|----|-------------------|
| rs11548297 | NP_005507 | L | V | LV | benign            |
| rs11548298 | NP_005507 | V | A | VA | benign            |
| rs11548299 | NP_005507 | S | R | SR | benign            |
| rs11548304 | NP_000009 | S | F | SF | possibly damaging |
| rs11548305 | NP_000009 | V | I | VI | benign            |
| rs11548313 | NP_006852 | G | A | GA | benign            |
| rs11548330 | NP_065804 | Q | R | QR | benign            |
| rs11548333 | XP_371010 | L | F | LF | benign            |
| rs11548335 | NP_068578 | P | Q | PQ | probably damaging |
| rs11548348 | XP_165448 | K | R | KR | benign            |
| rs11548349 | XP_165448 | L | P | LP | probably damaging |
| rs11548351 | NP_444505 | Q | H | QH | possibly damaging |
| rs11548352 | XP_165448 | F | L | FL | benign            |
| rs11548354 | XP_165448 | R | L | RL | probably damaging |
| rs11548355 | XP_165448 | I | F | IF | possibly damaging |
| rs11548359 | NP_444505 | Q | H | QH | benign            |
| rs11548360 | XP_165448 | E | K | EK | possibly damaging |
| rs11548361 | XP_165448 | E | G | EG | benign            |
| rs11548362 | XP_165448 | N | D | ND | benign            |
| rs11548363 | XP_165448 | E | Q | EQ | benign            |
| rs11548365 | XP_165448 | P | S | PS | possibly damaging |
| rs11548367 | XP_165448 | A | V | AV | possibly damaging |
| rs11548370 | XP_165448 | A | S | AS | benign            |
| rs11548371 | XP_165448 | T | I | TI | benign            |
| rs11548379 | NP_444505 | N | K | NK | benign            |
| rs11548381 | XP_165448 | P | R | PR | benign            |
| rs11548382 | XP_165448 | G | C | GC | probably damaging |
| rs11548385 | XP_165448 | H | Y | HY | benign            |
| rs11548390 | NP_002523 | E | G | EG | possibly damaging |
| rs11548395 | NP_000175 | E | V | EV | benign            |
| rs11548395 | NP_000550 | E | V | EV | benign            |
| rs11548396 | NP_940909 | P | T | PT | possibly damaging |
| rs11548401 | NP_001141 | T | S | TS | possibly damaging |
| rs11548407 | NP_038470 | P | S | PS | probably damaging |
| rs11548409 | NP_689613 | G | E | GE | possibly damaging |
| rs11548416 | NP_115873 | A | V | AV | benign            |
| rs11548423 | XP_290777 | E | G | EG | possibly damaging |
| rs11548431 | NP_996800 | D | Y | DY | probably damaging |
| rs11548432 | NP_996800 | N | D | ND | benign            |
| rs11548458 | NP_066925 | R | W | RW | probably damaging |
| rs11548459 | NP_066925 | P | L | PL | probably damaging |
| rs11548465 | NP_060370 | E | D | ED | benign            |
| rs11548473 | NP_061108 | V | F | VF | possibly damaging |
| rs11548486 | XP_209569 | M | I | MI | benign            |
| rs11548491 | NP_001558 | A | G | AG | benign            |
| rs11548526 | NP_877578 | S | F | SF | probably damaging |

|            |           |   |   |    |                   |
|------------|-----------|---|---|----|-------------------|
| rs11548526 | NP_000997 | S | F | SF | probably damaging |
| rs11548527 | XP_039702 | S | F | SF | benign            |
| rs11548529 | XP_039702 | S | F | SF | possibly damaging |
| rs11548541 | NP_003928 | K | E | KE | benign            |
| rs11548561 | NP_054749 | M | I | MI | possibly damaging |
| rs11548572 | NP_055156 | L | P | LP | possibly damaging |
| rs11548575 | NP_055156 | F | L | FL | benign            |
| rs11548581 | NP_055156 | P | A | PA | possibly damaging |
| rs11548596 | NP_680090 | P | L | PL | probably damaging |
| rs11548596 | NP_680091 | P | L | PL | probably damaging |
| rs11548596 | NP_680092 | P | L | PL | probably damaging |
| rs11548596 | NP_680093 | P | L | PL | probably damaging |
| rs11548596 | NP_001899 | P | L | PL | probably damaging |
| rs11548605 | NP_000508 | A | V | AV | benign            |
| rs11548605 | NP_000549 | A | V | AV | benign            |
| rs11548615 | NP_055568 | A | S | AS | benign            |
| rs11548633 | NP_003891 | K | E | KE | benign            |
| rs11548635 | NP_003891 | W | R | WR | probably damaging |
| rs11548649 | NP_060422 | D | G | DG | possibly damaging |
| rs11548663 | NP_057359 | V | M | VM | benign            |
| rs11548675 | NP_077318 | S | P | SP | benign            |
| rs11548676 | NP_077318 | A | S | AS | benign            |
| rs11548711 | XP_371023 | R | M | RM | possibly damaging |
| rs11548722 | NP_004402 | G | R | GR | probably damaging |
| rs11548739 | NP_000356 | G | V | GV | probably damaging |
| rs11548740 | XP_371261 | T | S | TS | benign            |
| rs11548741 | XP_371261 | H | Y | HY | probably damaging |
| rs11548742 | XP_371261 | V | G | VG | probably damaging |
| rs11548743 | XP_371261 | A | E | AE | probably damaging |
| rs11548744 | XP_371261 | P | T | PT | benign            |
| rs11548747 | XP_371261 | Q | K | QK | benign            |
| rs11548749 | NP_000356 | F | L | FL | benign            |
| rs11548751 | XP_371261 | A | S | AS | benign            |
| rs11548761 | NP_001350 | F | L | FL | probably damaging |
| rs11548765 | NP_055271 | S | Y | SY | possibly damaging |
| rs11548765 | NP_663314 | S | Y | SY | possibly damaging |
| rs11548778 | NP_061820 | M | T | MT | probably damaging |
| rs11548785 | NP_061820 | K | R | KR | possibly damaging |
| rs11548791 | NP_061820 | R | W | RW | benign            |
| rs11548795 | NP_061820 | K | R | KR | benign            |
| rs11548796 | NP_061820 | P | S | PS | probably damaging |
| rs11548798 | NP_061820 | K | M | KM | possibly damaging |
| rs11548799 | NP_061820 | T | A | TA | probably damaging |
| rs11548805 | NP_061820 | G | D | GD | probably damaging |
| rs11548812 | NP_061820 | K | N | KN | possibly damaging |
| rs11548815 | NP_061820 | V | I | VI | benign            |

|            |           |   |   |    |                   |
|------------|-----------|---|---|----|-------------------|
| rs11548816 | NP_061820 | T | I | TI | possibly damaging |
| rs11548818 | NP_061820 | P | H | PH | probably damaging |
| rs11548820 | NP_061820 | Y | C | YC | probably damaging |
| rs11548825 | NP_998801 | S | C | SC | benign            |
| rs11548825 | NP_976228 | S | C | SC | benign            |
| rs11548825 | NP_005442 | S | C | SC | benign            |
| rs11548839 | NP_057564 | P | T | PT | probably damaging |
| rs11548840 | NP_057564 | P | A | PA | probably damaging |
| rs11548856 | NP_004630 | A | V | AV | benign            |
| rs11548856 | NP_542434 | A | V | AV | benign            |
| rs11548858 | NP_004630 | G | D | GD | possibly damaging |
| rs11548858 | NP_542434 | G | D | GD | possibly damaging |
| rs11548866 | NP_115607 | A | S | AS | benign            |
| rs11548870 | NP_001340 | A | T | AT | benign            |
| rs11548876 | NP_009152 | A | V | AV | benign            |
| rs11548878 | NP_612642 | Q | H | QH | possibly damaging |
| rs11548880 | NP_612642 | S | F | SF | possibly damaging |
| rs11548883 | XP_291268 | F | L | FL | possibly damaging |
| rs11548889 | NP_003534 | R | H | RH | probably damaging |
| rs11548902 | NP_037397 | A | S | AS | benign            |
| rs11548912 | NP_055227 | L | F | LF | benign            |
| rs11548916 | NP_055418 | K | E | KE | benign            |
| rs11548921 | NP_038476 | R | G | RG | possibly damaging |
| rs11548921 | NP_872589 | R | G | RG | possibly damaging |
| rs11548926 | NP_689407 | Y | C | YC | probably damaging |
| rs11548927 | NP_057163 | A | V | AV | benign            |
| rs11548971 | NP_006207 | C | S | CS | possibly damaging |
| rs11548973 | NP_006207 | L | Q | LQ | possibly damaging |
| rs11548974 | NP_006207 | I | V | IV | benign            |
| rs11548975 | NP_997219 | H | R | HR | possibly damaging |
| rs11548976 | NP_997219 | A | V | AV | benign            |
| rs11548996 | NP_000166 | M | I | MI | benign            |
| rs11549002 | NP_000166 | E | D | ED | benign            |
| rs11549005 | NP_068355 | P | H | PH | probably damaging |
| rs11549005 | NP_006418 | P | H | PH | probably damaging |
| rs11549010 | NP_006114 | V | I | VI | benign            |
| rs11549010 | NP_000193 | V | I | VI | benign            |
| rs11549015 | NP_644670 | V | I | VI | benign            |
| rs11549023 | NP_000007 | A | V | AV | benign            |
| rs11549026 | NP_000007 | P | T | PT | probably damaging |
| rs11549029 | NP_653218 | P | L | PL | probably damaging |
| rs11549032 | NP_003843 | K | E | KE | benign            |
| rs11549032 | NP_056989 | K | E | KE | benign            |
| rs11549036 | NP_002853 | G | A | GA | benign            |
| rs11549039 | NP_006276 | P | S | PS | possibly damaging |
| rs11549043 | NP_004644 | D | Y | DY | possibly damaging |

|            |           |   |   |    |                   |
|------------|-----------|---|---|----|-------------------|
| rs11549044 | NP_003346 | R | C | RC | possibly damaging |
| rs11549055 | NP_000963 | R | L | RL | benign            |
| rs11549079 | NP_056469 | E | K | EK | benign            |
| rs11549094 | NP_000138 | Q | R | QR | benign            |
| rs11549095 | NP_000138 | R | H | RH | benign            |
| rs11549096 | NP_000138 | D | N | DN | possibly damaging |
| rs11549109 | NP_054864 | Y | H | YH | possibly damaging |
| rs11549113 | NP_054864 | R | H | RH | possibly damaging |
| rs11549136 | NP_003720 | R | G | RG | probably damaging |
| rs11549141 | NP_006467 | I | S | IS | possibly damaging |
| rs11549147 | NP_004453 | K | R | KR | benign            |
| rs11549152 | NP_004453 | S | G | SG | benign            |
| rs11549154 | NP_005527 | P | H | PH | probably damaging |
| rs11549172 | NP_001605 | P | L | PL | probably damaging |
| rs11549173 | NP_001605 | K | N | KN | benign            |
| rs11549175 | NP_001605 | G | V | GV | probably damaging |
| rs11549176 | NP_001605 | P | L | PL | probably damaging |
| rs11549177 | NP_001605 | P | L | PL | probably damaging |
| rs11549179 | NP_001605 | S | F | SF | probably damaging |
| rs11549180 | NP_001605 | A | V | AV | benign            |
| rs11549181 | NP_001605 | A | V | AV | benign            |
| rs11549185 | NP_001605 | G | A | GA | probably damaging |
| rs11549186 | NP_001605 | A | V | AV | possibly damaging |
| rs11549188 | NP_001605 | E | Q | EQ | possibly damaging |
| rs11549190 | NP_001605 | A | V | AV | benign            |
| rs11549196 | NP_001605 | A | S | AS | benign            |
| rs11549199 | NP_001605 | Q | L | QL | probably damaging |
| rs11549200 | NP_001605 | A | P | AP | possibly damaging |
| rs11549202 | NP_001605 | G | A | GA | benign            |
| rs11549204 | NP_001605 | S | L | SL | probably damaging |
| rs11549206 | NP_001605 | T | I | TI | probably damaging |
| rs11549214 | NP_001605 | G | R | GR | benign            |
| rs11549215 | NP_001605 | M | I | MI | probably damaging |
| rs11549216 | NP_001605 | V | G | VG | probably damaging |
| rs11549225 | NP_001605 | A | V | AV | probably damaging |
| rs11549229 | NP_001605 | P | T | PT | probably damaging |
| rs11549231 | NP_001605 | P | H | PH | probably damaging |
| rs11549236 | NP_001605 | H | R | HR | probably damaging |
| rs11549241 | NP_001605 | M | V | MV | possibly damaging |
| rs11549243 | NP_001605 | V | M | VM | possibly damaging |
| rs11549244 | NP_001605 | P | L | PL | probably damaging |
| rs11549251 | NP_997227 | V | M | VM | benign            |
| rs11549260 | NP_036259 | R | Q | RQ | benign            |
| rs11549262 | NP_036259 | L | P | LP | possibly damaging |
| rs11549266 | NP_036259 | V | M | VM | benign            |
| rs11549270 | NP_065908 | A | V | AV | benign            |

|            |           |   |   |    |                   |
|------------|-----------|---|---|----|-------------------|
| rs11549282 | NP_006102 | D | Y | DY | probably damaging |
| rs11549285 | NP_006102 | M | V | MV | benign            |
| rs11549310 | NP_689692 | R | H | RH | benign            |
| rs11549312 | NP_110517 | R | W | RW | probably damaging |
| rs11549316 | NP_002037 | S | L | SL | probably damaging |
| rs11549322 | NP_002037 | H | Q | HQ | probably damaging |
| rs11549334 | NP_002037 | K | N | KN | probably damaging |
| rs11549345 | NP_002037 | S | P | SP | possibly damaging |
| rs11549348 | NP_002037 | G | A | GA | benign            |
| rs11549406 | NP_000509 | L | V | LV | benign            |
| rs11549407 | NP_000509 | Q | K | QK | possibly damaging |
| rs11549415 | NP_683712 | V | A | VA | benign            |
| rs11549415 | NP_683711 | V | A | VA | benign            |
| rs11549415 | NP_683714 | V | A | VA | benign            |
| rs11549415 | NP_683713 | V | A | VA | benign            |
| rs11549415 | NP_683710 | V | A | VA | benign            |
| rs11549417 | NP_001625 | I | V | IV | benign            |
| rs11549428 | NP_003736 | Q | H | QH | benign            |
| rs11549441 | NP_001876 | A | P | AP | benign            |
| rs11549461 | NP_116269 | C | G | CG | probably damaging |
| rs11549465 | NP_851397 | P | S | PS | benign            |
| rs11549465 | NP_001521 | P | S | PS | possibly damaging |
| rs11549467 | NP_851397 | A | T | AT | benign            |
| rs11549467 | NP_001521 | A | T | AT | benign            |
| rs11549470 | NP_001144 | T | M | TM | possibly damaging |
| rs11549472 | NP_066982 | G | R | GR | probably damaging |
| rs11549485 | NP_057648 | N | D | ND | benign            |
| rs11549498 | NP_001297 | R | S | RS | probably damaging |
| rs11549502 | XP_041162 | A | V | AV | benign            |
| rs11549508 | NP_067650 | L | I | LI | benign            |
| rs11549509 | NP_067650 | P | H | PH | probably damaging |
| rs11549510 | NP_067650 | V | L | VL | benign            |
| rs11549511 | NP_002328 | G | C | GC | probably damaging |
| rs11549520 | NP_036610 | M | V | MV | possibly damaging |
| rs11549523 | NP_036610 | F | S | FS | probably damaging |
| rs11549537 | NP_001006 | R | C | RC | probably damaging |
| rs11549550 | NP_001006 | P | T | PT | benign            |
| rs11549551 | NP_001006 | R | H | RH | benign            |
| rs11549552 | NP_001006 | Q | E | QE | benign            |
| rs11549557 | NP_066018 | E | G | EG | possibly damaging |
| rs11549559 | NP_004413 | G | A | GA | benign            |
| rs11549571 | NP_149977 | R | C | RC | probably damaging |
| rs11549577 | NP_000959 | F | L | FL | probably damaging |
| rs11549578 | NP_000959 | I | T | IT | benign            |
| rs11549580 | NP_000959 | R | C | RC | probably damaging |
| rs11549588 | NP_000959 | I | F | IF | probably damaging |

|            |           |   |   |    |                   |
|------------|-----------|---|---|----|-------------------|
| rs11549600 | NP_000959 | P | A | PA | probably damaging |
| rs11549617 | NP_001395 | L | F | LF | benign            |
| rs11549643 | NP_056153 | P | L | PL | probably damaging |
| rs11549647 | NP_689511 | E | D | ED | benign            |
| rs11549647 | NP_751896 | E | D | ED | benign            |
| rs11549647 | NP_002473 | E | D | ED | benign            |
| rs11549661 | NP_958817 | T | I | TI | benign            |
| rs11549661 | NP_958816 | T | I | TI | possibly damaging |
| rs11549661 | NP_000475 | T | I | TI | possibly damaging |
| rs11549666 | NP_005563 | N | H | NH | benign            |
| rs11549666 | NP_733822 | N | H | NH | possibly damaging |
| rs11549666 | NP_733821 | N | H | NH | possibly damaging |
| rs11549667 | NP_733822 | K | T | KT | possibly damaging |
| rs11549667 | NP_733821 | K | T | KT | possibly damaging |
| rs11549667 | NP_005563 | K | T | KT | probably damaging |
| rs11549669 | NP_005563 | E | G | EG | benign            |
| rs11549669 | NP_733822 | E | G | EG | possibly damaging |
| rs11549669 | NP_733821 | E | G | EG | possibly damaging |
| rs11549682 | NP_000482 | C | W | CW | probably damaging |
| rs11549693 | NP_055572 | L | P | LP | possibly damaging |
| rs11549696 | NP_644671 | P | T | PT | probably damaging |
| rs11549700 | NP_006396 | L | M | LM | benign            |
| rs11549703 | NP_065969 | S | Y | SY | possibly damaging |
| rs11549717 | NP_078974 | P | S | PS | benign            |
| rs11549721 | NP_002847 | A | V | AV | benign            |
| rs11549734 | NP_005166 | K | N | KN | probably damaging |
| rs11549739 | NP_001689 | P | Q | PQ | possibly damaging |
| rs11549756 | NP_004628 | P | A | PA | benign            |
| rs11549759 | NP_004628 | K | E | KE | possibly damaging |
| rs11549764 | NP_003777 | A | V | AV | benign            |
| rs11549770 | NP_037447 | G | E | GE | possibly damaging |
| rs11549770 | NP_954869 | G | E | GE | possibly damaging |
| rs11549770 | NP_954870 | G | E | GE | possibly damaging |
| rs11549776 | NP_065147 | P | S | PS | benign            |
| rs11549777 | NP_065147 | A | V | AV | benign            |
| rs11549778 | NP_065147 | S | P | SP | benign            |
| rs11549779 | NP_065147 | K | R | KR | benign            |
| rs11549795 | NP_115580 | V | I | VI | benign            |
| rs11549796 | NP_115580 | A | P | AP | benign            |
| rs11549797 | NP_115580 | T | I | TI | possibly damaging |
| rs11549798 | NP_005351 | G | D | GD | possibly damaging |
| rs11549810 | NP_777588 | T | N | TN | benign            |
| rs11549824 | NP_542385 | P | S | PS | possibly damaging |
| rs11549830 | NP_443160 | R | W | RW | benign            |
| rs11549832 | NP_113632 | A | T | AT | benign            |
| rs11549854 | NP_148982 | M | K | MK | probably damaging |



|            |           |   |   |    |                   |
|------------|-----------|---|---|----|-------------------|
| rs11549855 | NP_057329 | I | M | IM | benign            |
| rs11549856 | NP_057329 | L | P | LP | probably damaging |
| rs11549864 | XP_495935 | S | Y | SY | possibly damaging |
| rs11549868 | NP_006421 | D | V | DV | probably damaging |
| rs11549870 | NP_006421 | T | I | TI | benign            |
| rs11549871 | NP_006421 | A | P | AP | benign            |
| rs11549885 | NP_114367 | R | W | RW | probably damaging |
| rs11549885 | NP_114368 | R | W | RW | probably damaging |
| rs11549885 | NP_002810 | R | W | RW | probably damaging |
| rs11549886 | NP_114367 | S | L | SL | benign            |
| rs11549886 | NP_114368 | S | L | SL | benign            |
| rs11549886 | NP_002810 | S | L | SL | benign            |
| rs11549909 | NP_002464 | V | L | VL | benign            |
| rs11549914 | NP_857593 | P | S | PS | benign            |
| rs11549914 | NP_003701 | P | S | PS | benign            |
| rs11549915 | NP_857593 | Y | C | YC | probably damaging |
| rs11549915 | NP_003701 | Y | C | YC | probably damaging |
| rs11549916 | NP_060518 | G | R | GR | probably damaging |
| rs11549918 | NP_003250 | I | V | IV | benign            |
| rs11549919 | NP_003181 | R | Q | RQ | benign            |
| rs11549919 | NP_757346 | R | Q | RQ | benign            |
| rs11549938 | NP_000700 | M | L | ML | benign            |
| rs11549946 | NP_003783 | L | M | LM | benign            |
| rs11549946 | NP_694880 | L | M | LM | benign            |
| rs11549952 | NP_000415 | S | F | SF | possibly damaging |
| rs11549953 | NP_000415 | H | Y | HY | benign            |
| rs11549969 | NP_006443 | S | C | SC | possibly damaging |
| rs11549978 | NP_055392 | R | G | RG | benign            |
| rs11549992 | NP_002871 | A | V | AV | benign            |
| rs11550016 | NP_055416 | P | L | PL | probably damaging |
| rs11550018 | NP_612461 | P | L | PL | probably damaging |
| rs11550019 | NP_612461 | Q | H | QH | possibly damaging |
| rs11550022 | NP_004279 | E | G | EG | possibly damaging |
| rs11550029 | NP_056147 | R | C | RC | probably damaging |
| rs11550034 | NP_060185 | I | T | IT | benign            |
| rs11550034 | NP_116313 | I | T | IT | benign            |
| rs11550038 | NP_068818 | K | R | KR | benign            |
| rs11550062 | NP_005984 | G | C | GC | possibly damaging |
| rs11550079 | XP_495939 | A | V | AV | benign            |
| rs11550103 | NP_060379 | S | I | SI | benign            |
| rs11550112 | NP_063968 | S | I | SI | possibly damaging |
| rs11550112 | NP_058432 | S | I | SI | possibly damaging |
| rs11550117 | NP_002848 | P | L | PL | probably damaging |
| rs11550118 | NP_002848 | Q | L | QL | possibly damaging |
| rs11550119 | NP_002848 | A | V | AV | benign            |
| rs11550124 | NP_064582 | H | N | HN | probably damaging |

|            |           |   |   |    |                   |
|------------|-----------|---|---|----|-------------------|
| rs11550129 | NP_852480 | Q | R | QR | possibly damaging |
| rs11550144 | NP_006400 | V | F | VF | benign            |
| rs11550151 | NP_005498 | R | H | RH | benign            |
| rs11550156 | NP_005498 | V | I | VI | benign            |
| rs11550157 | NP_005498 | K | N | KN | possibly damaging |
| rs11550158 | NP_005498 | A | S | AS | benign            |
| rs11550160 | NP_005498 | C | F | CF | probably damaging |
| rs11550166 | NP_078960 | S | P | SP | benign            |
| rs11550213 | NP_002941 | K | N | KN | benign            |
| rs11550225 | NP_001627 | G | W | GW | probably damaging |
| rs11550226 | NP_001627 | D | Y | DY | probably damaging |
| rs11550227 | NP_001627 | F | L | FL | possibly damaging |
| rs11550230 | NP_001627 | A | T | AT | benign            |
| rs11550238 | NP_001627 | V | M | VM | possibly damaging |
| rs11550241 | NP_004065 | R | Q | RQ | possibly damaging |
| rs11550242 | NP_060310 | R | I | RI | benign            |
| rs11550247 | NP_001966 | L | M | LM | benign            |
| rs11550252 | NP_001966 | W | C | WC | probably damaging |
| rs11550256 | NP_006732 | Q | R | QR | benign            |
| rs11550259 | NP_821080 | I | V | IV | benign            |
| rs11550262 | NP_001060 | D | N | DN | possibly damaging |
| rs11550263 | NP_001060 | P | H | PH | probably damaging |
| rs11550263 | NP_821080 | P | H | PH | probably damaging |
| rs11550266 | NP_001060 | H | N | HN | benign            |
| rs11550267 | NP_821080 | L | F | LF | benign            |
| rs11550277 | NP_005616 | D | N | DN | benign            |
| rs11550279 | NP_005616 | R | G | RG | benign            |
| rs11550281 | NP_005616 | P | H | PH | probably damaging |
| rs11550282 | NP_005616 | P | T | PT | possibly damaging |
| rs11550299 | NP_569710 | Q | H | QH | benign            |
| rs11550299 | NP_005691 | Q | H | QH | benign            |
| rs11550300 | NP_569710 | V | L | VL | benign            |
| rs11550300 | NP_005691 | V | L | VL | benign            |
| rs11550303 | NP_005691 | A | T | AT | benign            |
| rs11550304 | NP_057158 | V | L | VL | benign            |
| rs11550324 | NP_005792 | R | K | RK | benign            |
| rs11550333 | NP_056371 | K | E | KE | possibly damaging |
| rs11550349 | NP_056464 | M | I | MI | benign            |
| rs11550350 | XP_371284 | S | G | SG | benign            |
| rs11550353 | NP_006238 | K | N | KN | possibly damaging |
| rs11550374 | NP_006835 | H | R | HR | probably damaging |
| rs11550377 | NP_059447 | V | A | VA | benign            |
| rs11550380 | NP_004069 | G | C | GC | probably damaging |
| rs11550382 | NP_004069 | P | A | PA | benign            |
| rs11550385 | XP_088331 | A | S | AS | benign            |
| rs11550390 | NP_067050 | E | K | EK | benign            |

|            |           |   |   |    |                   |
|------------|-----------|---|---|----|-------------------|
| rs11550399 | NP_067050 | F | S | FS | probably damaging |
| rs11550400 | NP_057560 | H | Y | HY | possibly damaging |
| rs11550402 | NP_057560 | Q | K | QK | possibly damaging |
| rs11550441 | NP_004805 | V | A | VA | benign            |
| rs11550444 | NP_002785 | V | F | VF | benign            |
| rs11550454 | NP_001335 | L | P | LP | possibly damaging |
| rs11550455 | NP_001335 | S | L | SL | possibly damaging |
| rs11550462 | NP_060676 | L | S | LS | possibly damaging |
| rs11550472 | NP_612815 | L | P | LP | possibly damaging |
| rs11550473 | NP_001182 | A | T | AT | benign            |
| rs11550473 | NP_612815 | A | T | AT | benign            |
| rs11550488 | NP_066960 | L | I | LI | benign            |
| rs11550501 | NP_061153 | R | C | RC | probably damaging |
| rs11550504 | NP_061153 | V | A | VA | possibly damaging |
| rs11550508 | NP_003784 | Q | R | QR | benign            |
| rs11550513 | NP_060308 | Q | L | QL | possibly damaging |
| rs11550519 | XP_371954 | S | I | SI | possibly damaging |
| rs11550526 | NP_001008 | H | P | HP | probably damaging |
| rs11550531 | NP_060299 | L | R | LR | possibly damaging |
| rs11550540 | NP_291028 | T | A | TA | benign            |
| rs11550545 | NP_061828 | L | F | LF | benign            |
| rs11550548 | NP_061828 | A | V | AV | possibly damaging |
| rs11550554 | NP_071504 | P | R | PR | probably damaging |
| rs11550554 | NP_000911 | P | R | PR | probably damaging |
| rs11550569 | NP_944492 | T | R | TR | possibly damaging |
| rs11550569 | NP_005715 | T | R | TR | possibly damaging |
| rs11550570 | NP_005715 | G | R | GR | possibly damaging |
| rs11550570 | NP_944492 | G | R | GR | probably damaging |
| rs11550571 | NP_944492 | S | C | SC | possibly damaging |
| rs11550571 | NP_005715 | S | C | SC | possibly damaging |
| rs11550578 | NP_005611 | K | E | KE | possibly damaging |
| rs11550589 | NP_055940 | T | I | TI | possibly damaging |
| rs11550590 | NP_000466 | Q | L | QL | possibly damaging |
| rs11550597 | NP_001651 | V | A | VA | benign            |
| rs11550605 | NP_000844 | T | P | TP | possibly damaging |
| rs11550612 | NP_004095 | A | V | AV | benign            |
| rs11550617 | NP_065170 | S | Y | SY | possibly damaging |
| rs11550636 | NP_055199 | R | C | RC | possibly damaging |
| rs11550637 | NP_055199 | F | L | FL | probably damaging |
| rs11550653 | NP_002453 | H | R | HR | probably damaging |
| rs11550661 | NP_542174 | A | T | AT | benign            |
| rs11550663 | NP_599026 | S | N | SN | benign            |
| rs11550663 | NP_056441 | S | N | SN | benign            |
| rs11550682 | NP_612462 | D | Y | DY | probably damaging |
| rs11550683 | NP_003970 | C | F | CF | probably damaging |
| rs11550690 | NP_003263 | R | H | RH | possibly damaging |

|            |           |   |   |    |                   |
|------------|-----------|---|---|----|-------------------|
| rs11550697 | NP_037499 | E | G | EG | possibly damaging |
| rs11550699 | NP_079478 | K | R | KR | benign            |
| rs11550700 | NP_079478 | D | Y | DY | probably damaging |
| rs11550707 | NP_003370 | P | L | PL | probably damaging |
| rs11550711 | NP_005847 | M | L | ML | benign            |
| rs11550723 | NP_002961 | F | L | FL | benign            |
| rs11550737 | NP_001816 | L | M | LM | benign            |
| rs11550738 | NP_004060 | C | S | CS | benign            |
| rs11550766 | NP_612142 | R | S | RS | possibly damaging |
| rs11550777 | NP_114427 | P | L | PL | probably damaging |
| rs11550792 | NP_001393 | A | V | AV | benign            |
| rs11550797 | NP_001393 | S | I | SI | benign            |
| rs11550816 | NP_001393 | D | Y | DY | probably damaging |
| rs11550827 | NP_001393 | T | N | TN | benign            |
| rs11550874 | NP_002267 | G | V | GV | benign            |
| rs11550877 | NP_002267 | T | I | TI | possibly damaging |
| rs11550878 | NP_002267 | S | F | SF | possibly damaging |
| rs11550879 | NP_002267 | A | S | AS | benign            |
| rs11550880 | NP_002267 | L | P | LP | probably damaging |
| rs11550887 | NP_003204 | P | S | PS | benign            |
| rs11550887 | NP_958849 | P | S | PS | benign            |
| rs11550887 | NP_958851 | P | S | PS | benign            |
| rs11550894 | NP_003895 | W | G | WG | probably damaging |
| rs11550897 | NP_987095 | S | C | SC | benign            |
| rs11550900 | NP_663781 | H | N | HN | probably damaging |
| rs11550908 | NP_689752 | D | G | DG | possibly damaging |
| rs11550922 | NP_612372 | A | V | AV | benign            |
| rs11550924 | NP_055162 | S | F | SF | possibly damaging |
| rs11550924 | NP_997278 | S | F | SF | possibly damaging |
| rs11550931 | NP_057305 | P | T | PT | probably damaging |
| rs11550948 | NP_542170 | S | N | SN | benign            |
| rs11550963 | NP_003007 | R | G | RG | probably damaging |
| rs11550972 | NP_055759 | P | L | PL | possibly damaging |
| rs11550992 | NP_789776 | T | A | TA | benign            |
| rs11550993 | NP_005157 | G | E | GE | possibly damaging |
| rs11550995 | NP_005157 | R | H | RH | benign            |
| rs11550996 | NP_005157 | P | R | PR | probably damaging |
| rs11550998 | NP_005157 | R | Q | RQ | benign            |
| rs11550999 | NP_005157 | G | R | GR | possibly damaging |
| rs11551001 | NP_005157 | P | H | PH | probably damaging |
| rs11551011 | NP_004784 | L | M | LM | benign            |
| rs11551012 | NP_004784 | E | Q | EQ | benign            |
| rs11551014 | NP_004784 | N | D | ND | benign            |
| rs11551017 | NP_004784 | K | Q | KQ | benign            |
| rs11551021 | NP_003086 | W | R | WR | probably damaging |
| rs11551037 | NP_872628 | D | V | DV | probably damaging |

|            |           |   |   |    |                   |
|------------|-----------|---|---|----|-------------------|
| rs11551037 | NP_079150 | D | V | DV | probably damaging |
| rs11551058 | NP_005947 | G | W | GW | probably damaging |
| rs11551084 | XP_497119 | R | L | RL | possibly damaging |
| rs11551093 | NP_064555 | P | L | PL | probably damaging |
| rs11551099 | NP_056347 | F | S | FS | probably damaging |
| rs11551111 | NP_055323 | N | D | ND | benign            |
| rs11551112 | NP_055323 | T | I | TI | possibly damaging |
| rs11551125 | NP_690601 | V | L | VL | benign            |
| rs11551126 | NP_690601 | S | F | SF | probably damaging |
| rs11551140 | NP_817092 | T | A | TA | possibly damaging |
| rs11551144 | NP_004498 | M | V | MV | possibly damaging |
| rs11551150 | NP_005667 | P | L | PL | possibly damaging |
| rs11551150 | NP_690595 | P | L | PL | possibly damaging |
| rs11551151 | NP_005667 | T | A | TA | benign            |
| rs11551151 | NP_690595 | T | A | TA | benign            |
| rs11551157 | NP_001645 | S | F | SF | possibly damaging |
| rs11551165 | NP_003742 | A | S | AS | benign            |
| rs11551165 | NP_874371 | A | S | AS | benign            |
| rs11551171 | NP_003742 | S | L | SL | benign            |
| rs11551171 | NP_874371 | S | L | SL | benign            |
| rs11551172 | NP_004194 | V | A | VA | benign            |
| rs11551175 | NP_004806 | T | A | TA | benign            |
| rs11551178 | NP_003730 | A | S | AS | benign            |
| rs11551179 | NP_057246 | S | N | SN | benign            |
| rs11551204 | NP_055277 | R | K | RK | benign            |
| rs11551208 | NP_055478 | F | L | FL | benign            |
| rs11551209 | NP_055478 | L | F | LF | benign            |
| rs11551216 | NP_036350 | V | L | VL | benign            |
| rs11551216 | NP_004507 | V | L | VL | benign            |
| rs11551216 | NP_703194 | V | L | VL | benign            |
| rs11551219 | NP_064515 | Q | H | QH | benign            |
| rs11551220 | NP_064515 | T | K | TK | benign            |
| rs11551230 | NP_000724 | G | V | GV | benign            |
| rs11551240 | NP_073573 | I | T | IT | possibly damaging |
| rs11551241 | NP_064508 | A | S | AS | benign            |
| rs11551245 | NP_473451 | P | L | PL | probably damaging |
| rs11551247 | NP_073581 | L | S | LS | benign            |
| rs11551249 | NP_006375 | L | F | LF | benign            |
| rs11551250 | NP_006375 | I | T | IT | possibly damaging |
| rs11551251 | NP_006375 | G | V | GV | benign            |
| rs11551259 | NP_690875 | K | R | KR | benign            |
| rs11551259 | NP_997011 | K | R | KR | benign            |
| rs11551260 | NP_000157 | A | G | AG | possibly damaging |
| rs11551267 | NP_653262 | T | M | TM | benign            |
| rs11551268 | NP_056170 | F | L | FL | possibly damaging |
| rs11551275 | NP_055994 | E | D | ED | benign            |

|            |           |   |   |    |                   |
|------------|-----------|---|---|----|-------------------|
| rs11551302 | NP_079472 | V | A | VA | benign            |
| rs11551322 | NP_003378 | P | L | PL | possibly damaging |
| rs11551330 | NP_079543 | V | I | VI | benign            |
| rs11551345 | NP_955472 | L | W | LW | possibly damaging |
| rs11551347 | NP_955472 | R | G | RG | possibly damaging |
| rs11551365 | NP_663723 | Q | R | QR | benign            |
| rs11551382 | XP_291763 | E | G | EG | possibly damaging |
| rs11551383 | NP_057175 | C | S | CS | probably damaging |
| rs11551387 | NP_057175 | N | S | NS | benign            |
| rs11551416 | NP_002112 | T | I | TI | possibly damaging |
| rs11551421 | NP_002112 | V | M | VM | benign            |
| rs11551426 | NP_056326 | K | E | KE | benign            |
| rs11551432 | NP_001734 | M | I | MI | benign            |
| rs11551442 | NP_001734 | Q | R | QR | probably damaging |
| rs11551456 | NP_001734 | I | V | IV | benign            |
| rs11551457 | NP_001734 | D | G | DG | probably damaging |
| rs11551458 | NP_001734 | S | P | SP | probably damaging |
| rs11551472 | NP_000984 | E | D | ED | benign            |
| rs11551484 | NP_000984 | E | G | EG | probably damaging |
| rs11551488 | NP_000984 | G | V | GV | benign            |
| rs11551519 | NP_660305 | R | H | RH | benign            |
| rs11551520 | XP_496355 | A | V | AV | benign            |
| rs11551526 | NP_954654 | A | V | AV | possibly damaging |
| rs11551526 | NP_002511 | A | V | AV | possibly damaging |
| rs11551576 | NP_954654 | M | V | MV | possibly damaging |
| rs11551576 | NP_002511 | M | V | MV | possibly damaging |
| rs11551598 | NP_694881 | F | L | FL | probably damaging |
| rs11551598 | NP_006588 | F | L | FL | probably damaging |
| rs11551599 | NP_694881 | T | A | TA | benign            |
| rs11551599 | NP_006588 | T | A | TA | probably damaging |
| rs11551602 | NP_006588 | D | Y | DY | benign            |
| rs11551602 | NP_694881 | D | Y | DY | probably damaging |
| rs11551603 | NP_694881 | A | V | AV | benign            |
| rs11551603 | NP_006588 | A | V | AV | benign            |
| rs11551604 | NP_694881 | R | C | RC | benign            |
| rs11551604 | NP_006588 | R | C | RC | benign            |
| rs11551605 | NP_694881 | R | C | RC | benign            |
| rs11551605 | NP_006588 | R | C | RC | probably damaging |
| rs11551606 | NP_694881 | T | I | TI | probably damaging |
| rs11551606 | NP_006588 | T | I | TI | probably damaging |
| rs11551608 | NP_694881 | P | T | PT | probably damaging |
| rs11551608 | NP_006588 | P | T | PT | probably damaging |
| rs11551619 | NP_055385 | Q | R | QR | possibly damaging |
| rs11551623 | NP_954657 | A | V | AV | possibly damaging |
| rs11551623 | NP_000215 | A | V | AV | possibly damaging |
| rs11551624 | NP_954657 | G | R | GR | probably damaging |

|            |           |   |   |    |                   |
|------------|-----------|---|---|----|-------------------|
| rs11551624 | NP_000215 | G | R | GR | probably damaging |
| rs11551629 | NP_954657 | V | F | VF | possibly damaging |
| rs11551629 | NP_000215 | V | F | VF | possibly damaging |
| rs11551633 | NP_954657 | R | L | RL | probably damaging |
| rs11551633 | NP_000215 | R | L | RL | probably damaging |
| rs11551634 | NP_954657 | A | V | AV | benign            |
| rs11551634 | NP_000215 | A | V | AV | benign            |
| rs11551635 | NP_954657 | L | F | LF | benign            |
| rs11551635 | NP_000215 | L | F | LF | benign            |
| rs11551637 | NP_954657 | E | D | ED | benign            |
| rs11551637 | NP_000215 | E | D | ED | benign            |
| rs11551638 | NP_954657 | R | W | RW | benign            |
| rs11551638 | NP_000215 | R | W | RW | benign            |
| rs11551641 | NP_954657 | R | H | RH | possibly damaging |
| rs11551641 | NP_000215 | R | H | RH | possibly damaging |
| rs11551642 | NP_954657 | A | G | AG | benign            |
| rs11551642 | NP_000215 | A | G | AG | benign            |
| rs11551654 | NP_060142 | D | G | DG | benign            |
| rs11551661 | NP_620162 | I | V | IV | benign            |
| rs11551664 | NP_077718 | R | C | RC | probably damaging |
| rs11551666 | NP_077718 | A | G | AG | benign            |
| rs11551671 | NP_036558 | A | V | AV | benign            |
| rs11551672 | NP_036558 | T | I | TI | benign            |
| rs11551673 | NP_036558 | G | R | GR | probably damaging |
| rs11551676 | NP_000929 | E | K | EK | possibly damaging |
| rs11551682 | NP_004314 | T | I | TI | possibly damaging |
| rs11551689 | NP_057725 | R | H | RH | possibly damaging |
| rs11551691 | NP_612427 | P | L | PL | possibly damaging |
| rs11551698 | NP_001203 | A | P | AP | benign            |
| rs11551699 | NP_001203 | S | T | ST | benign            |
| rs11551705 | NP_004578 | E | D | ED | benign            |
| rs11551709 | NP_060181 | K | E | KE | benign            |
| rs11551727 | XP_208356 | P | T | PT | probably damaging |
| rs11551729 | NP_001880 | P | S | PS | probably damaging |
| rs11551730 | NP_077271 | L | I | LI | benign            |
| rs11551737 | NP_036418 | P | H | PH | probably damaging |
| rs11551749 | NP_000517 | G | V | GV | benign            |
| rs11551750 | NP_000517 | S | F | SF | possibly damaging |
| rs11551751 | NP_000517 | S | F | SF | benign            |
| rs11551755 | NP_000517 | E | K | EK | probably damaging |
| rs11551760 | NP_000517 | V | I | VI | benign            |
| rs11551762 | NP_085096 | A | S | AS | benign            |
| rs11551763 | NP_542781 | R | I | RI | possibly damaging |
| rs11551764 | NP_115501 | G | D | GD | benign            |
| rs11551765 | NP_115501 | S | A | SA | benign            |
| rs11551768 | NP_443097 | S | C | SC | benign            |

|            |           |   |   |    |                   |
|------------|-----------|---|---|----|-------------------|
| rs11551770 | NP_963853 | S | I | SI | possibly damaging |
| rs11551779 | NP_002780 | A | P | AP | benign            |
| rs11551782 | NP_002780 | E | G | EG | benign            |
| rs11551798 | NP_057125 | N | K | NK | possibly damaging |
| rs11551802 | NP_073594 | I | R | IR | possibly damaging |
| rs11551804 | NP_002494 | S | L | SL | benign            |
| rs11551827 | NP_006339 | P | L | PL | probably damaging |
| rs11551827 | NP_859422 | P | L | PL | probably damaging |
| rs11551834 | NP_067039 | Q | H | QH | possibly damaging |
| rs11551835 | NP_068656 | E | G | EG | benign            |
| rs11551835 | NP_000500 | E | G | EG | benign            |
| rs11551840 | NP_068656 | F | L | FL | probably damaging |
| rs11551840 | NP_000500 | F | L | FL | probably damaging |
| rs11551842 | NP_068656 | F | L | FL | benign            |
| rs11551842 | NP_000500 | F | L | FL | benign            |
| rs11551849 | NP_068656 | A | V | AV | benign            |
| rs11551849 | NP_000500 | A | V | AV | benign            |
| rs11551850 | NP_068656 | I | M | IM | benign            |
| rs11551850 | NP_000500 | I | M | IM | benign            |
| rs11551852 | NP_068656 | L | P | LP | possibly damaging |
| rs11551852 | NP_000500 | L | P | LP | possibly damaging |
| rs11551856 | NP_857635 | S | I | SI | benign            |
| rs11551856 | NP_857634 | S | I | SI | possibly damaging |
| rs11551856 | NP_036226 | S | I | SI | possibly damaging |
| rs11551857 | NP_857634 | K | N | KN | benign            |
| rs11551857 | NP_857635 | K | N | KN | benign            |
| rs11551857 | NP_036226 | K | N | KN | possibly damaging |
| rs11551858 | NP_857634 | G | R | GR | benign            |
| rs11551858 | NP_036226 | G | R | GR | benign            |
| rs11551867 | NP_003042 | S | G | SG | possibly damaging |
| rs11551892 | NP_006352 | A | P | AP | benign            |
| rs11551896 | NP_001719 | K | N | KN | benign            |
| rs11551896 | NP_940991 | K | N | KN | possibly damaging |
| rs11551914 | NP_620279 | P | S | PS | probably damaging |
| rs11551914 | NP_000147 | P | S | PS | probably damaging |
| rs11551941 | NP_958833 | S | L | SL | benign            |
| rs11551944 | NP_958833 | A | E | AE | benign            |
| rs11551945 | NP_958833 | P | R | PR | probably damaging |
| rs11551951 | XP_017966 | S | Y | SY | possibly damaging |
| rs11551952 | XP_017966 | S | L | SL | probably damaging |
| rs11551958 | NP_001928 | Y | N | YN | probably damaging |
| rs11551960 | NP_000033 | S | F | SF | probably damaging |
| rs11551966 | NP_849158 | H | R | HR | benign            |
| rs11551969 | NP_005763 | A | T | AT | benign            |
| rs11551977 | NP_068814 | A | V | AV | benign            |
| rs11551980 | NP_068814 | D | G | DG | probably damaging |



|            |           |   |   |    |                   |
|------------|-----------|---|---|----|-------------------|
| rs11551981 | NP_068814 | R | Q | RQ | benign            |
| rs11551983 | NP_055070 | Q | E | QE | benign            |
| rs11552000 | NP_000837 | M | T | MT | probably damaging |
| rs11552000 | NP_665683 | M | T | MT | probably damaging |
| rs11552006 | NP_219494 | L | F | LF | benign            |
| rs11552012 | NP_005461 | L | I | LI | benign            |
| rs11552016 | NP_057001 | R | G | RG | probably damaging |
| rs11552025 | NP_598011 | S | L | SL | benign            |
| rs11552025 | NP_598012 | S | L | SL | benign            |
| rs11552025 | NP_598010 | S | L | SL | benign            |
| rs11552025 | NP_598013 | S | L | SL | possibly damaging |
| rs11552036 | NP_877577 | I | T | IT | possibly damaging |
| rs11552039 | NP_005907 | Q | P | QP | possibly damaging |
| rs11552044 | NP_997223 | H | N | HN | possibly damaging |
| rs11552048 | NP_036321 | Q | K | QK | benign            |
| rs11552048 | NP_722452 | Q | K | QK | benign            |
| rs11552048 | NP_722454 | Q | K | QK | benign            |
| rs11552048 | NP_722453 | Q | K | QK | benign            |
| rs11552049 | NP_722454 | P | Q | PQ | benign            |
| rs11552049 | NP_619584 | P | Q | PQ | benign            |
| rs11552049 | NP_036321 | P | Q | PQ | possibly damaging |
| rs11552049 | NP_722452 | P | Q | PQ | possibly damaging |
| rs11552049 | NP_722453 | P | Q | PQ | possibly damaging |
| rs11552066 | NP_004919 | Q | R | QR | possibly damaging |
| rs11552070 | NP_004919 | L | M | LM | benign            |
| rs11552071 | NP_002783 | E | K | EK | benign            |
| rs11552091 | NP_060884 | Q | K | QK | benign            |
| rs11552103 | NP_005808 | K | N | KN | benign            |
| rs11552104 | NP_005808 | L | I | LI | benign            |
| rs11552109 | NP_002434 | Y | C | YC | probably damaging |
| rs11552118 | NP_079120 | Q | K | QK | possibly damaging |
| rs11552119 | NP_112494 | N | D | ND | benign            |
| rs11552121 | XP_097886 | A | V | AV | benign            |
| rs11552122 | XP_097886 | V | A | VA | benign            |
| rs11552123 | XP_097886 | R | H | RH | benign            |
| rs11552124 | NP_666500 | D | V | DV | possibly damaging |
| rs11552124 | NP_666499 | D | V | DV | possibly damaging |
| rs11552128 | NP_000598 | V | A | VA | benign            |
| rs11552128 | NP_000599 | V | A | VA | benign            |
| rs11552130 | NP_000598 | F | L | FL | probably damaging |
| rs11552145 | NP_002582 | E | K | EK | benign            |
| rs11552146 | NP_002582 | D | N | DN | benign            |
| rs11552179 | NP_000945 | R | Q | RQ | benign            |
| rs11552182 | NP_000945 | T | A | TA | possibly damaging |
| rs11552185 | NP_004537 | R | G | RG | probably damaging |
| rs11552197 | NP_001736 | G | S | GS | benign            |

|            |           |   |   |    |                   |
|------------|-----------|---|---|----|-------------------|
| rs11552198 | NP_001736 | T | A | TA | benign            |
| rs11552214 | NP_060134 | R | G | RG | probably damaging |
| rs11552215 | NP_060134 | A | T | AT | benign            |
| rs11552226 | NP_038471 | L | M | LM | benign            |
| rs11552228 | NP_038471 | A | V | AV | benign            |
| rs11552244 | NP_859057 | I | V | IV | benign            |
| rs11552246 | NP_060573 | S | Y | SY | possibly damaging |
| rs11552255 | NP_612469 | Q | K | QK | benign            |
| rs11552267 | NP_996896 | T | R | TR | possibly damaging |
| rs11552267 | NP_009039 | T | R | TR | probably damaging |
| rs11552278 | NP_056425 | R | K | RK | possibly damaging |
| rs11552279 | NP_001688 | I | M | IM | benign            |
| rs11552285 | NP_005889 | R | H | RH | possibly damaging |
| rs11552285 | NP_976240 | R | H | RH | possibly damaging |
| rs11552291 | NP_001143 | K | E | KE | benign            |
| rs11552304 | NP_079437 | P | L | PL | benign            |
| rs11552305 | NP_079437 | S | R | SR | possibly damaging |
| rs11552307 | NP_079437 | I | L | IL | benign            |
| rs11552310 | NP_008859 | N | I | NI | probably damaging |
| rs11552321 | NP_057048 | E | K | EK | benign            |
| rs11552329 | NP_116228 | A | T | AT | benign            |
| rs11552334 | NP_002045 | Y | H | YH | possibly damaging |
| rs11552362 | NP_003632 | L | V | LV | benign            |
| rs11552366 | NP_003632 | I | T | IT | possibly damaging |
| rs11552370 | NP_060096 | R | H | RH | possibly damaging |
| rs11552373 | NP_060096 | R | H | RH | possibly damaging |
| rs11552376 | NP_113631 | P | L | PL | probably damaging |
| rs11552377 | NP_113631 | V | I | VI | benign            |
| rs11552382 | NP_067653 | R | Q | RQ | possibly damaging |
| rs11552384 | NP_002970 | L | F | LF | benign            |
| rs11552386 | NP_002970 | N | S | NS | possibly damaging |
| rs11552387 | NP_002970 | A | T | AT | benign            |
| rs11552388 | NP_002970 | K | R | KR | benign            |
| rs11552407 | NP_066553 | S | R | SR | benign            |
| rs11552410 | NP_114172 | R | W | RW | probably damaging |
| rs11552412 | NP_057334 | G | V | GV | benign            |
| rs11552412 | NP_963294 | G | V | GV | benign            |
| rs11552412 | NP_963832 | G | V | GV | benign            |
| rs11552412 | NP_963835 | G | V | GV | benign            |
| rs11552412 | NP_963834 | G | V | GV | probably damaging |
| rs11552417 | NP_006013 | L | W | LW | benign            |
| rs11552431 | NP_076425 | L | I | LI | benign            |
| rs11552432 | NP_076425 | E | Q | EQ | benign            |
| rs11552438 | NP_005924 | S | I | SI | benign            |
| rs11552439 | NP_005924 | R | K | RK | benign            |
| rs11552441 | NP_758844 | I | M | IM | benign            |

|            |           |   |   |    |                   |
|------------|-----------|---|---|----|-------------------|
| rs11552445 | NP_036203 | R | G | RG | possibly damaging |
| rs11552447 | NP_073747 | P | H | PH | probably damaging |
| rs11552448 | NP_073747 | L | M | LM | benign            |
| rs11552456 | NP_055101 | F | L | FL | probably damaging |
| rs11552472 | NP_938083 | Q | H | QH | benign            |
| rs11552492 | NP_003286 | S | I | SI | probably damaging |
| rs11552498 | XP_497072 | Q | R | QR | benign            |
| rs11552499 | NP_003286 | P | R | PR | benign            |
| rs11552502 | XP_497072 | Q | K | QK | benign            |
| rs11552521 | NP_000173 | D | G | DG | probably damaging |
| rs11552530 | NP_005679 | R | W | RW | probably damaging |
| rs11552538 | XP_371108 | T | A | TA | benign            |
| rs11552542 | NP_005804 | Q | H | QH | possibly damaging |
| rs11552550 | NP_003008 | R | L | RL | probably damaging |
| rs11552560 | NP_005755 | T | M | TM | benign            |
| rs11552561 | NP_005755 | V | I | VI | benign            |
| rs11552580 | NP_056495 | H | Q | HQ | benign            |
| rs11552587 | NP_000867 | Q | R | QR | possibly damaging |
| rs11552601 | NP_955400 | R | W | RW | possibly damaging |
| rs11552601 | NP_056453 | R | W | RW | possibly damaging |
| rs11552618 | XP_370557 | A | S | AS | benign            |
| rs11552618 | XP_495809 | A | S | AS | benign            |
| rs11552632 | NP_001407 | Q | L | QL | benign            |
| rs11552636 | NP_001407 | S | A | SA | benign            |
| rs11552639 | NP_001407 | K | M | KM | possibly damaging |
| rs11552666 | NP_004995 | E | K | EK | benign            |
| rs11552667 | NP_004995 | S | F | SF | possibly damaging |
| rs11552668 | NP_982291 | V | A | VA | benign            |
| rs11552668 | NP_982292 | V | A | VA | benign            |
| rs11552668 | NP_689542 | V | A | VA | possibly damaging |
| rs11552672 | NP_003135 | A | T | AT | benign            |
| rs11552681 | NP_002706 | V | A | VA | probably damaging |
| rs11552686 | NP_005818 | L | P | LP | benign            |
| rs11552688 | NP_005818 | R | H | RH | benign            |
| rs11552694 | NP_000678 | K | R | KR | benign            |
| rs11552700 | NP_000678 | L | I | LI | benign            |
| rs11552703 | NP_112740 | N | Y | NY | benign            |
| rs11552706 | XP_292778 | A | T | AT | benign            |
| rs11552708 | NP_742084 | G | R | GR | benign            |
| rs11552708 | NP_742085 | G | R | GR | benign            |
| rs11552708 | NP_003799 | G | R | GR | benign            |
| rs11552709 | NP_742084 | V | L | VL | benign            |
| rs11552709 | NP_003799 | V | L | VL | benign            |
| rs11552709 | NP_742086 | V | L | VL | benign            |
| rs11552719 | NP_003759 | R | S | RS | benign            |
| rs11552728 | NP_036400 | L | P | LP | possibly damaging |

|            |           |   |   |    |                   |
|------------|-----------|---|---|----|-------------------|
| rs11552729 | NP_036400 | R | L | RL | possibly damaging |
| rs11552731 | NP_036400 | S | Y | SY | possibly damaging |
| rs11552752 | NP_940798 | L | I | LI | benign            |
| rs11552757 | NP_001655 | A | V | AV | probably damaging |
| rs11552761 | NP_001655 | G | E | GE | probably damaging |
| rs11552762 | NP_001655 | E | D | ED | benign            |
| rs11552775 | NP_116290 | L | V | LV | benign            |
| rs11552778 | NP_001751 | T | S | TS | benign            |
| rs11552789 | NP_001559 | E | G | EG | possibly damaging |
| rs11552793 | NP_001559 | I | T | IT | probably damaging |
| rs11552805 | NP_005767 | P | S | PS | probably damaging |
| rs11552822 | NP_478102 | R | L | RL | possibly damaging |
| rs11552822 | NP_000068 | D | Y | DY | probably damaging |
| rs11552823 | NP_000068 | P | L | PL | probably damaging |
| rs11552835 | NP_001012 | R | S | RS | possibly damaging |
| rs11552839 | NP_001012 | K | R | KR | benign            |
| rs11552843 | NP_001244 | A | T | AT | benign            |
| rs11552864 | NP_957715 | G | S | GS | possibly damaging |
| rs11552864 | NP_056651 | G | S | GS | possibly damaging |
| rs11552867 | NP_113671 | L | P | LP | benign            |
| rs11552887 | NP_057049 | L | M | LM | benign            |
| rs11552889 | NP_055785 | E | G | EG | possibly damaging |
| rs11552893 | NP_114110 | S | T | ST | benign            |
| rs11552901 | NP_115602 | F | S | FS | possibly damaging |
| rs11552902 | NP_115602 | G | V | GV | benign            |
| rs11552915 | NP_006752 | L | V | LV | possibly damaging |
| rs11552917 | NP_006752 | R | K | RK | probably damaging |
| rs11552922 | NP_775186 | R | W | RW | probably damaging |
| rs11552922 | NP_775187 | R | W | RW | probably damaging |
| rs11552922 | NP_004546 | R | W | RW | probably damaging |
| rs11552922 | NP_775188 | R | W | RW | probably damaging |
| rs11552926 | NP_055107 | P | A | PA | benign            |
| rs11552937 | NP_542189 | M | I | MI | benign            |
| rs11552939 | NP_031379 | S | G | SG | possibly damaging |
| rs11552953 | NP_001898 | T | I | TI | benign            |
| rs11552966 | NP_004539 | V | L | VL | benign            |
| rs11552969 | NP_077306 | P | L | PL | probably damaging |
| rs11552974 | NP_076423 | S | P | SP | possibly damaging |
| rs11552989 | NP_734467 | R | H | RH | benign            |
| rs11553017 | XP_498423 | P | A | PA | probably damaging |
| rs11553018 | XP_498423 | P | H | PH | probably damaging |
| rs11553019 | XP_498423 | P | H | PH | probably damaging |
| rs11553022 | XP_377498 | I | K | IK | probably damaging |
| rs11553023 | NP_110422 | P | H | PH | probably damaging |
| rs11553024 | NP_778230 | R | C | RC | probably damaging |
| rs11553032 | NP_004039 | R | C | RC | probably damaging |

|            |           |   |   |    |                   |
|------------|-----------|---|---|----|-------------------|
| rs11553035 | NP_004039 | P | S | PS | probably damaging |
| rs11553037 | NP_004039 | D | N | DN | possibly damaging |
| rs11553038 | NP_004039 | F | L | FL | possibly damaging |
| rs11553042 | NP_004039 | E | K | EK | possibly damaging |
| rs11553045 | NP_004039 | P | H | PH | probably damaging |
| rs11553049 | NP_004039 | K | R | KR | benign            |
| rs11553069 | NP_065199 | R | W | RW | possibly damaging |
| rs11553075 | NP_115689 | Q | R | QR | benign            |
| rs11553076 | NP_115689 | G | A | GA | possibly damaging |
| rs11553077 | NP_115689 | K | R | KR | benign            |
| rs11553079 | NP_005935 | Q | K | QK | benign            |
| rs11553081 | NP_064575 | D | E | DE | benign            |
| rs11553086 | NP_079178 | A | T | AT | benign            |
| rs11553094 | NP_476515 | V | M | VM | benign            |
| rs11553094 | NP_004804 | V | M | VM | benign            |
| rs11553106 | NP_908932 | A | V | AV | benign            |
| rs11553106 | NP_000025 | A | V | AV | benign            |
| rs11553107 | NP_908930 | E | Q | EQ | possibly damaging |
| rs11553107 | NP_908932 | E | Q | EQ | possibly damaging |
| rs11553107 | NP_000025 | E | Q | EQ | possibly damaging |
| rs11553108 | NP_908930 | G | V | GV | probably damaging |
| rs11553108 | NP_908932 | G | V | GV | probably damaging |
| rs11553108 | NP_000025 | G | V | GV | probably damaging |
| rs11553116 | NP_908930 | E | K | EK | benign            |
| rs11553116 | NP_908932 | E | K | EK | benign            |
| rs11553116 | NP_000025 | E | K | EK | benign            |
| rs11553122 | NP_689604 | P | Q | PQ | probably damaging |
| rs11553133 | NP_004366 | L | I | LI | benign            |
| rs11553134 | NP_004366 | P | Q | PQ | possibly damaging |
| rs11553137 | NP_004302 | P | R | PR | probably damaging |
| rs11553139 | NP_036585 | V | A | VA | benign            |
| rs11553154 | NP_660287 | S | F | SF | benign            |
| rs11553158 | NP_003133 | E | V | EV | probably damaging |
| rs11553169 | NP_076947 | A | V | AV | benign            |
| rs11553171 | NP_003075 | C | Y | CY | probably damaging |
| rs11553172 | NP_001551 | W | C | WC | probably damaging |
| rs11553179 | NP_078925 | G | V | GV | probably damaging |
| rs11553189 | NP_036601 | R | P | RP | probably damaging |
| rs11553190 | NP_036601 | E | G | EG | probably damaging |
| rs11553205 | NP_000137 | S | F | SF | possibly damaging |
| rs11553212 | NP_000137 | L | F | LF | benign            |
| rs11553214 | NP_000137 | H | N | HN | possibly damaging |
| rs11553216 | NP_000137 | H | N | HN | probably damaging |
| rs11553219 | NP_000137 | A | G | AG | benign            |
| rs11553225 | NP_000137 | E | Q | EQ | benign            |
| rs11553236 | NP_000137 | L | V | LV | benign            |

|            |           |   |   |    |                   |
|------------|-----------|---|---|----|-------------------|
| rs11553260 | NP_000137 | K | R | KR | probably damaging |
| rs11553262 | NP_000137 | S | I | SI | possibly damaging |
| rs11553266 | NP_000137 | D | Y | DY | possibly damaging |
| rs11553282 | NP_001679 | A | T | AT | benign            |
| rs11553285 | NP_001679 | I | V | IV | benign            |
| rs11553294 | NP_061127 | C | W | CW | probably damaging |
| rs11553309 | NP_000087 | E | K | EK | benign            |
| rs11553327 | NP_116024 | S | Y | SY | possibly damaging |
| rs11553328 | NP_116024 | P | T | PT | probably damaging |
| rs11553329 | NP_254275 | P | S | PS | benign            |
| rs11553329 | NP_056933 | P | S | PS | benign            |
| rs11553330 | XP_088367 | A | T | AT | benign            |
| rs11553338 | NP_003482 | A | S | AS | benign            |
| rs11553341 | NP_778203 | E | G | EG | probably damaging |
| rs11553341 | NP_001834 | E | G | EG | probably damaging |
| rs11553344 | NP_005756 | F | L | FL | possibly damaging |
| rs11553346 | NP_005756 | P | A | PA | probably damaging |
| rs11553349 | NP_005981 | C | G | CG | probably damaging |
| rs11553353 | NP_005981 | V | L | VL | benign            |
| rs11553354 | NP_665737 | R | Q | RQ | benign            |
| rs11553354 | NP_665738 | R | Q | RQ | benign            |
| rs11553354 | NP_060083 | R | Q | RQ | possibly damaging |
| rs11553357 | NP_001317 | R | H | RH | possibly damaging |
| rs11553358 | NP_006232 | P | Q | PQ | probably damaging |
| rs11553378 | NP_004246 | G | R | GR | possibly damaging |
| rs11553381 | NP_116185 | P | L | PL | probably damaging |
| rs11553384 | NP_005431 | A | G | AG | benign            |
| rs11553401 | NP_005006 | L | P | LP | possibly damaging |
| rs11553403 | NP_005006 | S | P | SP | benign            |
| rs11553404 | NP_005006 | P | S | PS | probably damaging |
| rs11553405 | NP_005006 | V | I | VI | benign            |
| rs11553421 | NP_036390 | L | M | LM | benign            |
| rs11553441 | NP_056518 | V | I | VI | benign            |
| rs11553443 | NP_056518 | K | N | KN | benign            |
| rs11553448 | NP_009166 | E | Q | EQ | benign            |
| rs11553454 | NP_000413 | G | A | GA | benign            |
| rs11553455 | NP_000413 | S | G | SG | benign            |
| rs11553458 | NP_000413 | S | T | ST | benign            |
| rs11553460 | NP_000413 | A | T | AT | benign            |
| rs11553464 | NP_689692 | L | P | LP | possibly damaging |
| rs11553481 | NP_003850 | L | P | LP | possibly damaging |
| rs11553483 | NP_003850 | R | L | RL | probably damaging |
| rs11553487 | XP_371960 | P | S | PS | possibly damaging |
| rs11553493 | NP_387498 | K | N | KN | possibly damaging |
| rs11553498 | NP_002038 | L | S | LS | possibly damaging |
| rs11553508 | NP_066299 | M | T | MT | probably damaging |

|            |           |   |   |    |                   |
|------------|-----------|---|---|----|-------------------|
| rs11553508 | NP_524148 | M | T | MT | probably damaging |
| rs11553508 | NP_524147 | M | T | MT | probably damaging |
| rs11553509 | NP_066299 | T | I | TI | benign            |
| rs11553509 | NP_524148 | T | I | TI | benign            |
| rs11553509 | NP_524147 | T | I | TI | benign            |
| rs11553511 | NP_066299 | D | G | DG | benign            |
| rs11553511 | NP_524148 | D | G | DG | benign            |
| rs11553511 | NP_524147 | D | G | DG | benign            |
| rs11553541 | NP_982284 | Q | K | QK | benign            |
| rs11553545 | NP_078875 | D | Y | DY | benign            |
| rs11553548 | NP_000265 | P | S | PS | benign            |
| rs11553549 | NP_000265 | S | Y | SY | benign            |
| rs11553551 | NP_000265 | P | R | PR | probably damaging |
| rs11553552 | NP_000265 | G | C | GC | benign            |
| rs11553554 | NP_000265 | G | D | GD | possibly damaging |
| rs11553567 | NP_775744 | L | R | LR | benign            |
| rs11553574 | NP_057010 | G | E | GE | benign            |
| rs11553592 | NP_001922 | D | V | DV | probably damaging |
| rs11553595 | NP_001922 | Q | R | QR | benign            |
| rs11553608 | NP_006383 | D | Y | DY | possibly damaging |
| rs11553614 | NP_001316 | E | K | EK | benign            |
| rs11553623 | NP_037532 | P | T | PT | possibly damaging |
| rs11553623 | NP_055189 | P | T | PT | possibly damaging |
| rs11553624 | NP_037532 | P | S | PS | benign            |
| rs11553624 | NP_055189 | P | S | PS | benign            |
| rs11553626 | NP_005260 | R | G | RG | possibly damaging |
| rs11553633 | NP_060282 | T | N | TN | benign            |
| rs11553639 | NP_063948 | E | G | EG | possibly damaging |
| rs11553642 | NP_063948 | S | C | SC | benign            |
| rs11553643 | NP_063948 | R | H | RH | possibly damaging |
| rs11553646 | NP_063948 | D | G | DG | possibly damaging |
| rs11553647 | NP_063948 | I | F | IF | benign            |
| rs11553649 | NP_063948 | M | I | MI | benign            |
| rs11553651 | NP_067010 | S | I | SI | possibly damaging |
| rs11553652 | NP_067010 | K | E | KE | possibly damaging |
| rs11553659 | NP_006288 | R | H | RH | benign            |
| rs11553661 | NP_665862 | R | H | RH | possibly damaging |
| rs11553664 | NP_037368 | P | R | PR | possibly damaging |
| rs11553672 | NP_000293 | K | N | KN | benign            |
| rs11553674 | NP_000293 | R | W | RW | possibly damaging |
| rs11553690 | NP_003106 | A | T | AT | benign            |
| rs11553694 | NP_001975 | N | K | NK | possibly damaging |
| rs11553697 | NP_114408 | Q | R | QR | benign            |
| rs11553706 | NP_057143 | I | T | IT | probably damaging |
| rs11553709 | NP_002786 | D | H | DH | possibly damaging |
| rs11553713 | NP_653228 | A | V | AV | benign            |

|            |           |   |   |    |                   |
|------------|-----------|---|---|----|-------------------|
| rs11553721 | NP_055205 | N | S | NS | benign            |
| rs11553724 | NP_872304 | R | Q | RQ | benign            |
| rs11553730 | NP_005639 | P | H | PH | probably damaging |
| rs11553743 | NP_004291 | G | R | GR | benign            |
| rs11553759 | NP_004374 | V | F | VF | benign            |
| rs11553775 | NP_068657 | D | N | DN | benign            |
| rs11553775 | NP_000499 | D | N | DN | benign            |
| rs11553812 | NP_000971 | R | W | RW | probably damaging |
| rs11553816 | NP_000985 | M | V | MV | probably damaging |
| rs11553817 | NP_000985 | G | C | GC | benign            |
| rs11553823 | NP_000985 | K | I | KI | probably damaging |
| rs11553827 | NP_000985 | P | H | PH | probably damaging |
| rs11553838 | NP_003507 | H | Y | HY | benign            |
| rs11553845 | NP_002760 | T | A | TA | benign            |
| rs11553847 | NP_002760 | P | S | PS | benign            |
| rs11553848 | NP_002760 | F | S | FS | probably damaging |
| rs11553849 | NP_002760 | K | E | KE | benign            |
| rs11553866 | NP_005557 | E | K | EK | benign            |
| rs11553874 | NP_005557 | G | R | GR | probably damaging |
| rs11553883 | NP_066362 | H | D | HD | probably damaging |
| rs11553886 | NP_659547 | T | M | TM | benign            |
| rs11553892 | NP_000843 | L | M | LM | benign            |
| rs11553920 | NP_005710 | T | A | TA | benign            |
| rs11553925 | NP_068752 | N | K | NK | benign            |
| rs11553935 | NP_006259 | P | S | PS | probably damaging |
| rs11553948 | NP_056238 | P | H | PH | possibly damaging |
| rs11553952 | NP_001265 | I | V | IV | benign            |
| rs11553957 | XP_370665 | P | Q | PQ | probably damaging |
| rs11553971 | NP_004878 | P | H | PH | probably damaging |
| rs11553974 | NP_064730 | R | I | RI | possibly damaging |
| rs11553974 | NP_064731 | R | I | RI | possibly damaging |
| rs11553974 | NP_064720 | R | I | RI | possibly damaging |
| rs11553989 | NP_009035 | E | Q | EQ | benign            |
| rs11553990 | NP_071888 | D | G | DG | possibly damaging |
| rs11553997 | NP_116261 | N | K | NK | benign            |
| rs11554011 | NP_524144 | G | S | GS | benign            |
| rs11554011 | NP_524146 | G | S | GS | benign            |
| rs11554012 | NP_002228 | P | H | PH | benign            |
| rs11554039 | NP_524575 | L | M | LM | benign            |
| rs11554039 | NP_005992 | L | M | LM | benign            |
| rs11554050 | NP_004395 | V | F | VF | possibly damaging |
| rs11554059 | NP_002065 | R | H | RH | probably damaging |
| rs11554094 | XP_497846 | K | Q | KQ | possibly damaging |
| rs11554096 | NP_002558 | Q | P | QP | probably damaging |
| rs11554097 | NP_002558 | K | R | KR | benign            |
| rs11554101 | NP_002558 | R | S | RS | probably damaging |



|            |           |   |   |    |                   |
|------------|-----------|---|---|----|-------------------|
| rs11554104 | NP_001252 | A | T | AT | benign            |
| rs11554106 | NP_003134 | Y | H | YH | benign            |
| rs11554109 | NP_003134 | G | R | GR | possibly damaging |
| rs11554111 | NP_000275 | H | Y | HY | probably damaging |
| rs11554129 | NP_055965 | C | S | CS | benign            |
| rs11554138 | NP_005887 | T | P | TP | probably damaging |
| rs11554151 | XP_209704 | V | D | VD | probably damaging |
| rs11554156 | NP_000972 | L | F | LF | benign            |
| rs11554159 | NP_006323 | R | Q | RQ | benign            |
| rs11554163 | NP_005618 | Q | K | QK | benign            |
| rs11554172 | NP_660277 | R | H | RH | possibly damaging |
| rs11554173 | NP_722578 | P | Q | PQ | possibly damaging |
| rs11554175 | NP_079491 | R | L | RL | benign            |
| rs11554198 | XP_290506 | K | N | KN | benign            |
| rs11554200 | XP_290506 | K | N | KN | benign            |
| rs11554201 | XP_290506 | D | G | DG | possibly damaging |
| rs11554212 | NP_061871 | R | Q | RQ | benign            |
| rs11554213 | NP_839890 | D | G | DG | possibly damaging |
| rs11554213 | NP_061871 | D | G | DG | possibly damaging |
| rs11554213 | NP_839891 | D | G | DG | probably damaging |
| rs11554215 | NP_061119 | P | T | PT | possibly damaging |
| rs11554217 | NP_003748 | C | R | CR | probably damaging |
| rs11554219 | NP_003748 | Q | L | QL | possibly damaging |
| rs11554220 | NP_003748 | V | L | VL | benign            |
| rs11554222 | NP_003748 | H | R | HR | probably damaging |
| rs11554227 | NP_006809 | P | L | PL | probably damaging |
| rs11554228 | NP_006809 | D | G | DG | possibly damaging |
| rs11554264 | NP_061189 | E | Q | EQ | benign            |
| rs11554274 | NP_536351 | R | H | RH | benign            |
| rs11554274 | NP_000507 | R | H | RH | benign            |
| rs11554278 | NP_536351 | L | I | LI | benign            |
| rs11554278 | NP_000507 | L | I | LI | benign            |
| rs11554279 | NP_071432 | A | T | AT | benign            |
| rs11554280 | NP_002264 | D | Y | DY | probably damaging |
| rs11554290 | NP_002515 | Q | R | QR | probably damaging |
| rs11554294 | NP_073733 | R | L | RL | probably damaging |
| rs11554308 | NP_055551 | V | M | VM | benign            |
| rs11554309 | NP_055551 | F | S | FS | probably damaging |
| rs11554313 | NP_055551 | E | K | EK | benign            |
| rs11554317 | NP_055551 | R | W | RW | probably damaging |
| rs11554320 | NP_055551 | E | G | EG | possibly damaging |
| rs11554322 | NP_056050 | R | W | RW | probably damaging |
| rs11554336 | NP_064507 | D | A | DA | probably damaging |
| rs11554352 | NP_060245 | E | K | EK | benign            |
| rs11554353 | NP_060245 | L | I | LI | benign            |
| rs11554354 | NP_060245 | S | F | SF | benign            |

|            |           |   |   |    |                   |
|------------|-----------|---|---|----|-------------------|
| rs11554355 | NP_060245 | P | R | PR | probably damaging |
| rs11554362 | NP_037519 | A | V | AV | benign            |
| rs11554373 | NP_004777 | P | L | PL | probably damaging |
| rs11554376 | NP_439892 | V | L | VL | possibly damaging |
| rs11554376 | NP_001789 | V | L | VL | probably damaging |
| rs11554379 | NP_476528 | Y | C | YC | probably damaging |
| rs11554379 | NP_057310 | Y | C | YC | probably damaging |
| rs11554380 | NP_476528 | V | F | VF | possibly damaging |
| rs11554380 | NP_057310 | V | F | VF | possibly damaging |
| rs11554383 | NP_002097 | V | A | VA | benign            |
| rs11554386 | NP_002097 | P | T | PT | possibly damaging |
| rs11554411 | NP_653192 | Q | K | QK | benign            |
| rs11554413 | NP_659421 | S | C | SC | benign            |
| rs11554423 | NP_000680 | G | R | GR | benign            |
| rs11554426 | NP_000680 | V | A | VA | benign            |
| rs11554428 | NP_001664 | C | S | CS | benign            |
| rs11554428 | NP_597680 | C | S | CS | benign            |
| rs11554428 | NP_899199 | C | S | CS | benign            |
| rs11554434 | NP_066972 | W | R | WR | probably damaging |
| rs11554438 | NP_000994 | D | N | DN | possibly damaging |
| rs11554439 | XP_496612 | H | Q | HQ | benign            |
| rs11554441 | XP_496612 | A | V | AV | benign            |
| rs11554446 | XP_496612 | P | S | PS | benign            |
| rs11554447 | NP_000994 | A | P | AP | possibly damaging |
| rs11554449 | NP_000994 | A | T | AT | benign            |
| rs11554452 | XP_496612 | G | V | GV | probably damaging |
| rs11554456 | NP_938408 | N | S | NS | benign            |
| rs11554456 | NP_057050 | N | S | NS | benign            |
| rs11554462 | NP_072049 | Y | H | YH | benign            |
| rs11554470 | NP_001089 | M | R | MR | probably damaging |
| rs11554484 | NP_002264 | R | W | RW | benign            |
| rs11554491 | NP_002264 | S | I | SI | benign            |
| rs11554494 | NP_002264 | I | T | IT | probably damaging |
| rs11554495 | NP_002264 | G | C | GC | probably damaging |
| rs11554499 | NP_002264 | E | G | EG | probably damaging |
| rs11554500 | NP_002264 | S | F | SF | probably damaging |
| rs11554504 | NP_055955 | R | W | RW | probably damaging |
| rs11554511 | NP_076990 | L | V | LV | benign            |
| rs11554541 | NP_002503 | G | V | GV | probably damaging |
| rs11554560 | NP_037506 | V | M | VM | benign            |
| rs11554564 | NP_005648 | G | W | GW | possibly damaging |
| rs11554580 | NP_005535 | G | R | GR | possibly damaging |
| rs11554608 | NP_116202 | P | T | PT | possibly damaging |
| rs11554617 | NP_444278 | A | V | AV | benign            |
| rs11554646 | NP_001762 | P | L | PL | probably damaging |
| rs11554650 | NP_056474 | T | M | TM | possibly damaging |

|            |           |   |   |    |                   |
|------------|-----------|---|---|----|-------------------|
| rs11554654 | NP_056474 | L | F | LF | benign            |
| rs11554658 | NP_066999 | M | V | MV | possibly damaging |
| rs11554661 | NP_066954 | L | I | LI | benign            |
| rs11554661 | NP_821067 | L | I | LI | benign            |
| rs11554661 | NP_821068 | L | I | LI | benign            |
| rs11554661 | NP_821070 | L | I | LI | benign            |
| rs11554668 | NP_001840 | A | V | AV | benign            |
| rs11554675 | NP_004418 | E | Q | EQ | benign            |
| rs11554675 | NP_932157 | E | Q | EQ | benign            |
| rs11554687 | NP_002083 | P | S | PS | possibly damaging |
| rs11554688 | NP_002083 | A | T | AT | benign            |
| rs11554691 | NP_005576 | W | C | WC | probably damaging |
| rs11554714 | NP_003303 | P | A | PA | probably damaging |
| rs11554724 | NP_715638 | Q | K | QK | benign            |
| rs11554732 | NP_006748 | Y | D | YD | probably damaging |
| rs11554754 | NP_974223 | G | V | GV | possibly damaging |
| rs11554758 | NP_003836 | E | Q | EQ | benign            |
| rs11554765 | NP_054722 | S | F | SF | benign            |
| rs11554779 | NP_938023 | G | E | GE | possibly damaging |
| rs11554790 | NP_060346 | D | Y | DY | probably damaging |
| rs11554790 | NP_919442 | D | Y | DY | probably damaging |
| rs11554798 | NP_003357 | Q | R | QR | benign            |
| rs11554895 | NP_009207 | E | K | EK | benign            |
| rs11554895 | NP_057671 | E | K | EK | benign            |
| rs11554898 | NP_112200 | A | V | AV | benign            |
| rs11554900 | NP_054817 | E | G | EG | possibly damaging |
| rs11554900 | NP_006784 | E | G | EG | possibly damaging |
| rs11554902 | NP_054817 | R | Q | RQ | benign            |
| rs11554902 | NP_006784 | R | Q | RQ | possibly damaging |
| rs11554910 | NP_054817 | Y | C | YC | possibly damaging |
| rs11554910 | NP_006784 | Y | C | YC | possibly damaging |
| rs11554916 | NP_054817 | D | G | DG | probably damaging |
| rs11554916 | NP_006784 | D | G | DG | probably damaging |
| rs11554917 | NP_054817 | A | V | AV | benign            |
| rs11554917 | NP_006784 | A | V | AV | possibly damaging |
| rs11554918 | NP_054817 | V | I | VI | benign            |
| rs11554918 | NP_006784 | V | I | VI | benign            |
| rs11554919 | NP_054817 | A | V | AV | benign            |
| rs11554919 | NP_006784 | A | V | AV | benign            |
| rs11554920 | NP_054817 | T | A | TA | benign            |
| rs11554920 | NP_006784 | T | A | TA | benign            |
| rs11554936 | NP_000970 | A | V | AV | benign            |
| rs11554939 | NP_000970 | L | I | LI | benign            |
| rs11554942 | NP_000970 | N | D | ND | benign            |
| rs11554943 | NP_000970 | V | M | VM | possibly damaging |
| rs11554958 | NP_002134 | E | D | ED | benign            |

|            |              |   |   |    |                   |
|------------|--------------|---|---|----|-------------------|
| rs11554977 | NP_000682    | S | P | SP | probably damaging |
| rs11554978 | NP_000682    | S | I | SI | probably damaging |
| rs11554987 | NP_115909    | N | D | ND | possibly damaging |
| rs11555002 | NP_644808    | G | C | GC | probably damaging |
| rs11555015 | NP_002769    | A | T | AT | benign            |
| rs11555030 | NP_001271    | D | H | DH | benign            |
| rs11555031 | NP_001271    | T | A | TA | possibly damaging |
| rs11555033 | NP_001271    | A | P | AP | possibly damaging |
| rs11555037 | NP_060553    | N | S | NS | benign            |
| rs11555038 | NP_060553    | P | L | PL | probably damaging |
| rs11555043 | NP_001900    | T | I | TI | probably damaging |
| rs11555044 | NP_001900    | P | L | PL | probably damaging |
| rs11555045 | NP_001900    | F | L | FL | probably damaging |
| rs11555055 | NP_998784    | N | D | ND | benign            |
| rs11555055 | NP_998785    | N | D | ND | benign            |
| rs11555063 | NP_001001481 | P | A | PA | probably damaging |
| rs11555063 | NP_060769    | P | A | PA | probably damaging |
| rs11555064 | NP_001001481 | F | L | FL | probably damaging |
| rs11555064 | NP_060769    | F | L | FL | probably damaging |
| rs11555066 | NP_057714    | L | P | LP | possibly damaging |
| rs11555090 | NP_005095    | E | D | ED | benign            |
| rs11555096 | NP_000128    | R | W | RW | probably damaging |
| rs11555100 | NP_005908    | K | E | KE | benign            |
| rs11555102 | NP_005908    | P | H | PH | probably damaging |
| rs11555108 | NP_068823    | P | H | PH | possibly damaging |
| rs11555108 | NP_954595    | P | H | PH | possibly damaging |
| rs11555108 | NP_071887    | P | H | PH | probably damaging |
| rs11555108 | NP_954673    | P | H | PH | probably damaging |
| rs11555108 | NP_003340    | P | H | PH | probably damaging |
| rs11555126 | NP_060077    | E | D | ED | benign            |
| rs11555140 | NP_008952    | I | M | IM | benign            |
| rs11555167 | NP_976086    | R | G | RG | possibly damaging |
| rs11555167 | NP_004252    | R | G | RG | probably damaging |
| rs11555170 | NP_004252    | S | G | SG | benign            |
| rs11555170 | NP_976086    | S | G | SG | benign            |
| rs11555171 | NP_004252    | Q | R | QR | benign            |
| rs11555171 | NP_976086    | Q | R | QR | benign            |
| rs11555179 | NP_002076    | A | V | AV | benign            |
| rs11555193 | NP_005591    | A | P | AP | benign            |
| rs11555194 | NP_055493    | D | E | DE | benign            |
| rs11555213 | NP_036277    | H | Y | HY | benign            |
| rs11555215 | NP_000894    | R | P | RP | probably damaging |
| rs11555217 | NP_001351    | W | S | WS | probably damaging |
| rs11555224 | NP_001822    | R | S | RS | probably damaging |
| rs11555224 | NP_976084    | R | S | RS | probably damaging |
| rs11555226 | NP_001822    | L | I | LI | benign            |

|            |           |   |   |    |                   |
|------------|-----------|---|---|----|-------------------|
| rs11555226 | NP_976084 | L | I | LI | benign            |
| rs11555227 | NP_001822 | S | R | SR | benign            |
| rs11555227 | NP_976084 | S | R | SR | benign            |
| rs11555240 | NP_653182 | R | W | RW | possibly damaging |
| rs11555241 | NP_958786 | C | F | CF | probably damaging |
| rs11555241 | NP_958785 | C | F | CF | probably damaging |
| rs11555241 | NP_958784 | C | F | CF | probably damaging |
| rs11555241 | NP_958783 | C | F | CF | probably damaging |
| rs11555241 | NP_958782 | C | F | CF | probably damaging |
| rs11555241 | NP_958781 | C | F | CF | probably damaging |
| rs11555241 | NP_958780 | C | F | CF | probably damaging |
| rs11555241 | NP_000436 | C | F | CF | probably damaging |
| rs11555246 | NP_057269 | P | H | PH | probably damaging |
| rs11555249 | NP_001246 | G | E | GE | probably damaging |
| rs11555252 | NP_055630 | C | F | CF | probably damaging |
| rs11555262 | NP_006365 | P | S | PS | benign            |
| rs11555275 | NP_689761 | A | V | AV | benign            |
| rs11555279 | NP_006559 | C | Y | CY | probably damaging |
| rs11555280 | NP_006559 | T | I | TI | benign            |
| rs11555283 | NP_001544 | P | Q | PQ | possibly damaging |
| rs11555284 | NP_001544 | R | G | RG | benign            |
| rs11555285 | NP_001544 | C | Y | CY | probably damaging |
| rs11555287 | NP_001544 | E | D | ED | benign            |
| rs11555293 | NP_001544 | A | T | AT | benign            |
| rs11555296 | NP_001544 | K | R | KR | benign            |
| rs11555304 | NP_065790 | S | P | SP | benign            |
| rs11555312 | NP_073715 | Q | K | QK | benign            |
| rs11555315 | XP_496965 | V | A | VA | benign            |
| rs11555318 | XP_496965 | N | I | NI | benign            |
| rs11555322 | NP_006704 | I | T | IT | possibly damaging |
| rs11555333 | NP_116184 | F | L | FL | benign            |
| rs11555342 | NP_009005 | H | D | HD | probably damaging |
| rs11555343 | NP_003549 | F | S | FS | probably damaging |
| rs11555344 | NP_000393 | V | L | VL | benign            |
| rs11555349 | XP_114087 | M | T | MT | probably damaging |
| rs11555361 | NP_620077 | K | N | KN | benign            |
| rs11555361 | NP_056264 | K | N | KN | benign            |
| rs11555369 | NP_005761 | S | G | SG | benign            |
| rs11555372 | NP_005761 | P | S | PS | possibly damaging |
| rs11555376 | NP_005761 | P | S | PS | possibly damaging |
| rs11555382 | NP_149113 | Q | R | QR | benign            |
| rs11555385 | NP_112243 | V | M | VM | benign            |
| rs11555386 | NP_002333 | P | S | PS | possibly damaging |
| rs11555404 | NP_060179 | V | A | VA | benign            |
| rs11555414 | NP_009185 | P | L | PL | probably damaging |
| rs11555417 | NP_006326 | A | V | AV | benign            |

|            |           |   |   |    |                   |
|------------|-----------|---|---|----|-------------------|
| rs11555420 | NP_006326 | E | D | ED | benign            |
| rs11555432 | NP_005154 | L | P | LP | probably damaging |
| rs11555433 | NP_005154 | V | A | VA | benign            |
| rs11555442 | NP_064707 | V | A | VA | benign            |
| rs11555443 | NP_006444 | W | C | WC | probably damaging |
| rs11555444 | NP_002481 | K | E | KE | benign            |
| rs11555449 | NP_002481 | P | H | PH | probably damaging |
| rs11555453 | NP_060624 | V | L | VL | benign            |
| rs11555463 | NP_005585 | F | L | FL | probably damaging |
| rs11555466 | NP_001753 | T | M | TM | probably damaging |
| rs11555474 | NP_055579 | Q | H | QH | benign            |
| rs11555480 | NP_659435 | V | M | VM | benign            |
| rs11555481 | NP_689642 | G | D | GD | possibly damaging |
| rs11555484 | NP_073609 | L | F | LF | benign            |
| rs11555496 | NP_055577 | D | N | DN | benign            |
| rs11555523 | NP_000300 | T | A | TA | benign            |
| rs11555524 | NP_000300 | E | D | ED | benign            |
| rs11555533 | NP_071327 | R | C | RC | possibly damaging |
| rs11555534 | NP_071327 | V | L | VL | benign            |
| rs11555539 | NP_071390 | A | P | AP | benign            |
| rs11555540 | NP_005496 | V | F | VF | benign            |
| rs11555542 | NP_057234 | N | D | ND | benign            |
| rs11555547 | NP_976221 | Q | H | QH | possibly damaging |
| rs11555548 | NP_976221 | P | L | PL | probably damaging |
| rs11555549 | NP_976221 | V | L | VL | benign            |
| rs11555550 | NP_976221 | G | W | GW | probably damaging |
| rs11555579 | NP_000990 | F | L | FL | possibly damaging |
| rs11555588 | NP_003841 | I | K | IK | benign            |
| rs11555591 | NP_116145 | R | W | RW | possibly damaging |
| rs11555607 | NP_054775 | G | R | GR | benign            |
| rs11555620 | NP_005993 | R | Q | RQ | possibly damaging |
| rs11555621 | NP_006594 | T | I | TI | benign            |
| rs11555649 | NP_060267 | C | G | CG | probably damaging |
| rs11555676 | NP_115866 | A | V | AV | benign            |
| rs11555677 | NP_115866 | T | I | TI | possibly damaging |
| rs11555678 | NP_115866 | F | S | FS | probably damaging |
| rs11555685 | NP_004506 | T | I | TI | possibly damaging |
| rs11555689 | XP_376178 | L | F | LF | benign            |
| rs11555692 | NP_612421 | P | H | PH | probably damaging |
| rs11555695 | NP_075408 | P | L | PL | probably damaging |
| rs11555695 | NP_004073 | P | L | PL | probably damaging |
| rs11555698 | NP_115750 | T | I | TI | possibly damaging |
| rs11555705 | NP_000683 | A | T | AT | benign            |
| rs11555712 | NP_001011 | K | N | KN | benign            |
| rs11555713 | XP_497482 | A | V | AV | possibly damaging |
| rs11555717 | XP_497657 | H | R | HR | possibly damaging |

|            |           |   |   |    |                   |
|------------|-----------|---|---|----|-------------------|
| rs11555721 | NP_056422 | M | I | MI | benign            |
| rs11555728 | NP_000219 | R | C | RC | probably damaging |
| rs11555732 | NP_004040 | Y | F | YF | benign            |
| rs11555739 | NP_054765 | S | P | SP | benign            |
| rs11555755 | XP_087500 | Q | R | QR | benign            |
| rs11555760 | NP_057226 | S | G | SG | possibly damaging |
| rs11555770 | NP_000110 | S | I | SI | possibly damaging |
| rs11555779 | NP_005434 | A | T | AT | benign            |
| rs11555782 | NP_078986 | E | D | ED | benign            |
| rs11555785 | NP_078986 | I | M | IM | benign            |
| rs11555797 | NP_054859 | R | H | RH | benign            |
| rs11555803 | NP_055792 | R | K | RK | benign            |
| rs11555804 | NP_003305 | K | E | KE | benign            |
| rs11555817 | NP_006826 | K | R | KR | benign            |
| rs11555820 | NP_006826 | L | F | LF | benign            |
| rs11555825 | NP_060761 | S | T | ST | benign            |
| rs11555830 | NP_002124 | R | H | RH | benign            |
| rs11555842 | NP_653244 | Q | E | QE | benign            |
| rs11555843 | NP_002666 | A | T | AT | benign            |
| rs11555843 | NP_150241 | A | T | AT | benign            |
| rs11555843 | NP_150242 | A | T | AT | benign            |
| rs11555843 | NP_150247 | A | T | AT | benign            |
| rs11555843 | NP_150243 | A | T | AT | benign            |
| rs11555844 | NP_005165 | Q | H | QH | benign            |
| rs11555848 | NP_005165 | A | S | AS | benign            |
| rs11555851 | NP_054890 | S | N | SN | benign            |
| rs11555862 | NP_058644 | R | Q | RQ | benign            |
| rs11555869 | NP_110395 | S | P | SP | possibly damaging |
| rs11555870 | NP_110395 | H | Y | HY | possibly damaging |
| rs11555871 | NP_037470 | D | G | DG | probably damaging |
| rs11555873 | NP_665735 | V | F | VF | possibly damaging |
| rs11555891 | NP_062558 | D | N | DN | benign            |
| rs11555893 | NP_699181 | F | L | FL | possibly damaging |
| rs11555910 | NP_006614 | L | V | LV | benign            |
| rs11555911 | NP_006614 | K | N | KN | benign            |
| rs11555922 | NP_055214 | N | D | ND | possibly damaging |
| rs11555928 | NP_957516 | K | E | KE | benign            |
| rs11555930 | NP_957516 | A | P | AP | benign            |
| rs11555944 | NP_055439 | E | K | EK | benign            |
| rs11555948 | NP_003840 | Q | R | QR | benign            |
| rs11555959 | NP_660215 | Q | R | QR | benign            |
| rs11555989 | NP_001824 | K | N | KN | possibly damaging |
| rs11555989 | NP_009027 | K | N | KN | possibly damaging |
| rs11555993 | NP_620157 | L | V | LV | benign            |
| rs11555996 | NP_005697 | P | L | PL | probably damaging |
| rs11556003 | NP_001055 | F | L | FL | probably damaging |

|            |           |   |   |    |                   |
|------------|-----------|---|---|----|-------------------|
| rs11556004 | NP_001055 | F | L | FL | probably damaging |
| rs11556009 | XP_371024 | P | H | PH | possibly damaging |
| rs11556013 | NP_002487 | D | Y | DY | possibly damaging |
| rs11556015 | NP_073745 | A | V | AV | benign            |
| rs11556036 | NP_000966 | S | L | SL | benign            |
| rs11556037 | NP_000966 | G | C | GC | probably damaging |
| rs11556043 | NP_000512 | P | S | PS | possibly damaging |
| rs11556045 | NP_000512 | K | R | KR | benign            |
| rs11556058 | NP_079272 | Q | R | QR | probably damaging |
| rs11556061 | NP_003702 | P | Q | PQ | possibly damaging |
| rs11556061 | NP_795714 | P | Q | PQ | probably damaging |
| rs11556062 | NP_795714 | F | L | FL | probably damaging |
| rs11556062 | NP_003702 | F | L | FL | probably damaging |
| rs11556069 | NP_001311 | M | I | MI | benign            |
| rs11556076 | NP_002405 | A | V | AV | benign            |
| rs11556080 | NP_002405 | M | V | MV | benign            |
| rs11556098 | NP_877962 | Q | P | QP | possibly damaging |
| rs11556099 | NP_877962 | D | N | DN | benign            |
| rs11556105 | NP_079100 | Q | K | QK | benign            |
| rs11556108 | NP_056229 | L | Q | LQ | probably damaging |
| rs11556108 | NP_378669 | L | Q | LQ | probably damaging |
| rs11556110 | NP_056229 | K | E | KE | probably damaging |
| rs11556110 | NP_378669 | K | E | KE | probably damaging |
| rs11556113 | NP_056229 | D | G | DG | possibly damaging |
| rs11556113 | NP_378669 | D | G | DG | possibly damaging |
| rs11556122 | NP_061980 | G | V | GV | probably damaging |
| rs11556157 | NP_057092 | I | L | IL | benign            |
| rs11556167 | NP_004555 | A | D | AD | benign            |
| rs11556179 | NP_000582 | E | K | EK | benign            |
| rs11556201 | NP_006656 | F | Y | FY | benign            |
| rs11556202 | NP_296373 | N | T | NT | benign            |
| rs11556202 | NP_055817 | N | T | NT | benign            |
| rs11556209 | NP_057657 | A | S | AS | benign            |
| rs11556224 | NP_000169 | G | E | GE | probably damaging |
| rs11556229 | NP_060812 | P | Q | PQ | probably damaging |
| rs11556239 | NP_877571 | D | G | DG | possibly damaging |
| rs11556239 | NP_877572 | D | G | DG | possibly damaging |
| rs11556239 | NP_877573 | D | G | DG | possibly damaging |
| rs11556239 | NP_898830 | D | G | DG | possibly damaging |
| rs11556239 | NP_898831 | D | G | DG | possibly damaging |
| rs11556239 | NP_898883 | D | G | DG | possibly damaging |
| rs11556239 | NP_877570 | D | G | DG | possibly damaging |
| rs11556239 | NP_001872 | D | G | DG | possibly damaging |
| rs11556239 | NP_853549 | D | G | DG | probably damaging |
| rs11556239 | NP_898829 | D | G | DG | probably damaging |
| rs11556240 | NP_064576 | I | T | IT | possibly damaging |



|            |           |   |   |    |                   |
|------------|-----------|---|---|----|-------------------|
| rs11556244 | NP_064576 | M | V | MV | possibly damaging |
| rs11556250 | NP_443081 | A | S | AS | benign            |
| rs11556251 | NP_443081 | Q | K | QK | benign            |
| rs11556261 | NP_060755 | L | M | LM | benign            |
| rs11556262 | NP_060755 | R | C | RC | probably damaging |
| rs11556263 | NP_060755 | Q | R | QR | benign            |
| rs11556265 | NP_060755 | H | Y | HY | probably damaging |
| rs11556274 | NP_004172 | L | P | LP | probably damaging |
| rs11556275 | NP_004172 | V | A | VA | benign            |
| rs11556279 | NP_004172 | S | F | SF | possibly damaging |
| rs11556285 | NP_066284 | K | N | KN | benign            |
| rs11556287 | NP_932349 | W | R | WR | benign            |
| rs11556291 | NP_009216 | V | A | VA | benign            |
| rs11556297 | NP_009216 | P | T | PT | possibly damaging |
| rs11556306 | NP_078812 | R | G | RG | probably damaging |
| rs11556307 | NP_078812 | V | A | VA | benign            |
| rs11556310 | NP_078812 | R | Q | RQ | possibly damaging |
| rs11556319 | NP_004209 | V | L | VL | benign            |
| rs11556323 | NP_006277 | D | N | DN | benign            |
| rs11556324 | NP_005995 | A | V | AV | benign            |
| rs11556331 | NP_000969 | L | P | LP | probably damaging |
| rs11556332 | NP_000969 | L | F | LF | benign            |
| rs11556333 | NP_000969 | L | P | LP | benign            |
| rs11556344 | NP_006109 | P | S | PS | benign            |
| rs11556352 | NP_073593 | R | M | RM | benign            |
| rs11556377 | NP_002457 | V | M | VM | possibly damaging |
| rs11556379 | NP_002457 | I | M | IM | benign            |
| rs11556380 | NP_612364 | A | T | AT | possibly damaging |
| rs11556383 | NP_057475 | Q | P | QP | probably damaging |
| rs11556392 | NP_068378 | L | R | LR | benign            |
| rs11556406 | NP_060480 | L | V | LV | benign            |
| rs11556408 | NP_116034 | Q | K | QK | benign            |
| rs11556408 | NP_005046 | Q | K | QK | benign            |
| rs11556432 | NP_001995 | R | L | RL | probably damaging |
| rs11556433 | XP_496902 | D | Y | DY | probably damaging |
| rs11556436 | NP_001995 | Q | R | QR | possibly damaging |
| rs11556437 | NP_001995 | P | S | PS | probably damaging |
| rs11556450 | NP_057550 | A | P | AP | benign            |
| rs11556456 | NP_061932 | S | G | SG | possibly damaging |
| rs11556461 | NP_004654 | E | K | EK | benign            |
| rs11556468 | NP_075572 | A | V | AV | benign            |
| rs11556468 | NP_075573 | A | V | AV | benign            |
| rs11556468 | NP_075574 | A | V | AV | benign            |
| rs11556468 | NP_075575 | A | V | AV | benign            |
| rs11556468 | NP_075571 | A | V | AV | benign            |
| rs11556474 | NP_955391 | L | V | LV | benign            |

|            |           |   |   |    |                   |
|------------|-----------|---|---|----|-------------------|
| rs11556474 | NP_955392 | L | V | LV | benign            |
| rs11556474 | NP_955393 | L | V | LV | benign            |
| rs11556474 | NP_955394 | L | V | LV | benign            |
| rs11556474 | NP_955395 | L | V | LV | benign            |
| rs11556474 | NP_003279 | L | V | LV | benign            |
| rs11556482 | NP_060381 | L | V | LV | benign            |
| rs11556490 | NP_001633 | V | M | VM | benign            |
| rs11556497 | NP_008971 | R | C | RC | probably damaging |
| rs11556497 | NP_653334 | R | C | RC | probably damaging |
| rs11556517 | NP_006223 | K | E | KE | benign            |
| rs11556530 | NP_000992 | D | V | DV | probably damaging |
| rs11556534 | NP_000992 | H | R | HR | probably damaging |
| rs11556552 | NP_065710 | L | V | LV | benign            |
| rs11556553 | NP_065710 | G | E | GE | benign            |
| rs11556559 | XP_496654 | I | M | IM | benign            |
| rs11556561 | XP_496654 | Y | C | YC | probably damaging |
| rs11556563 | NP_115987 | Q | R | QR | benign            |
| rs11556566 | NP_006803 | Q | R | QR | benign            |
| rs11556568 | NP_006803 | R | G | RG | probably damaging |
| rs11556574 | NP_004877 | A | V | AV | benign            |
| rs11556575 | NP_057192 | H | Y | HY | possibly damaging |
| rs11556578 | NP_057192 | I | M | IM | benign            |
| rs11556591 | NP_002435 | N | S | NS | probably damaging |
| rs11556596 | NP_060727 | L | I | LI | benign            |
| rs11556597 | NP_008916 | L | F | LF | benign            |
| rs11556605 | NP_689518 | K | R | KR | benign            |
| rs11556605 | NP_064616 | R | K | RK | benign            |
| rs11556607 | NP_003896 | H | Y | HY | possibly damaging |
| rs11556608 | NP_003896 | H | N | HN | probably damaging |
| rs11556612 | NP_003989 | D | H | DH | possibly damaging |
| rs11556625 | NP_006795 | D | E | DE | benign            |
| rs11556643 | NP_079234 | L | V | LV | benign            |
| rs11556658 | NP_001393 | T | I | TI | probably damaging |
| rs11556676 | NP_001393 | T | I | TI | benign            |
| rs11556692 | NP_001393 | C | W | CW | probably damaging |
| rs11556731 | NP_660282 | P | R | PR | possibly damaging |
| rs11556732 | NP_660282 | P | S | PS | possibly damaging |
| rs11556736 | NP_115766 | L | F | LF | benign            |
| rs11556739 | NP_115766 | I | T | IT | benign            |
| rs11556741 | NP_006613 | L | R | LR | possibly damaging |
| rs11556749 | NP_001575 | H | R | HR | probably damaging |
| rs11556750 | NP_004855 | P | H | PH | probably damaging |
| rs11556757 | NP_005711 | R | L | RL | possibly damaging |
| rs11556758 | NP_005711 | R | L | RL | possibly damaging |
| rs11556761 | NP_689912 | H | P | HP | probably damaging |
| rs11556766 | NP_114417 | Y | C | YC | probably damaging |

|            |           |   |   |    |                   |
|------------|-----------|---|---|----|-------------------|
| rs11556774 | NP_004844 | K | N | KN | benign            |
| rs11556775 | NP_054880 | P | S | PS | possibly damaging |
| rs11556788 | NP_057021 | A | P | AP | benign            |
| rs11556789 | NP_057021 | G | A | GA | benign            |
| rs11556792 | NP_004499 | N | I | NI | probably damaging |
| rs11556796 | NP_115649 | L | I | LI | benign            |
| rs11556797 | NP_115649 | R | H | RH | benign            |
| rs11556800 | NP_919333 | R | S | RS | benign            |
| rs11556800 | NP_055586 | R | S | RS | benign            |
| rs11556801 | NP_919333 | R | H | RH | possibly damaging |
| rs11556801 | NP_055586 | R | H | RH | possibly damaging |
| rs11556809 | NP_000311 | R | G | RG | benign            |
| rs11556814 | NP_057680 | E | D | ED | benign            |
| rs11556814 | NP_056216 | E | D | ED | benign            |
| rs11556823 | NP_647539 | R | H | RH | probably damaging |
| rs11556823 | NP_003395 | R | H | RH | probably damaging |
| rs11556827 | NP_004198 | C | F | CF | benign            |
| rs11556834 | NP_000260 | Q | H | QH | benign            |
| rs11556834 | NP_937818 | Q | H | QH | benign            |
| rs11556837 | NP_116274 | G | V | GV | benign            |
| rs11556838 | NP_116274 | S | G | SG | benign            |
| rs11556848 | NP_036476 | L | M | LM | benign            |
| rs11556857 | NP_690857 | A | V | AV | benign            |
| rs11556857 | NP_219489 | A | V | AV | benign            |
| rs11556868 | NP_003991 | A | V | AV | benign            |
| rs11556869 | NP_003991 | P | S | PS | probably damaging |
| rs11556877 | NP_001813 | L | H | LH | possibly damaging |
| rs11556887 | NP_536349 | A | V | AV | benign            |
| rs11556887 | NP_004500 | A | V | AV | benign            |
| rs11556888 | NP_004501 | E | K | EK | benign            |
| rs11556888 | NP_536349 | E | K | EK | benign            |
| rs11556888 | NP_004500 | E | K | EK | benign            |
| rs11556892 | NP_055212 | P | A | PA | probably damaging |
| rs11556895 | NP_077275 | A | V | AV | benign            |
| rs11556905 | NP_068839 | A | T | AT | benign            |
| rs11556910 | NP_057146 | P | Q | PQ | possibly damaging |
| rs11556920 | NP_055020 | E | K | EK | benign            |
| rs11556923 | NP_057562 | S | L | SL | possibly damaging |
| rs11556924 | NP_057562 | R | H | RH | benign            |
| rs11556936 | NP_005007 | M | I | MI | benign            |
| rs11556936 | NP_114366 | M | I | MI | benign            |
| rs11556938 | NP_055269 | V | A | VA | benign            |
| rs11556939 | NP_006358 | V | A | VA | benign            |
| rs11556942 | NP_006358 | F | L | FL | probably damaging |
| rs11556954 | NP_003555 | E | D | ED | benign            |
| rs11556957 | NP_003555 | L | F | LF | benign            |

|            |           |   |   |    |                   |
|------------|-----------|---|---|----|-------------------|
| rs11556958 | NP_003555 | Q | R | QR | possibly damaging |
| rs11556959 | NP_689589 | H | R | HR | possibly damaging |
| rs11556969 | NP_116325 | T | N | TN | possibly damaging |
| rs11556974 | NP_004485 | G | D | GD | benign            |
| rs11556976 | NP_004485 | E | K | EK | benign            |
| rs11556980 | XP_377713 | F | L | FL | benign            |
| rs11556986 | NP_068749 | S | C | SC | benign            |
| rs11556992 | NP_291035 | P | S | PS | probably damaging |
| rs11557000 | NP_848694 | A | P | AP | benign            |
| rs11557000 | NP_848693 | A | P | AP | benign            |
| rs11557002 | NP_848694 | A | S | AS | benign            |
| rs11557002 | NP_848693 | A | S | AS | benign            |
| rs11557004 | NP_848694 | L | P | LP | possibly damaging |
| rs11557004 | NP_848693 | L | P | LP | possibly damaging |
| rs11557013 | NP_005708 | S | G | SG | possibly damaging |
| rs11557020 | XP_061427 | M | I | MI | possibly damaging |
| rs11557029 | XP_496093 | Y | H | YH | benign            |
| rs11557030 | NP_071404 | Y | D | YD | probably damaging |
| rs11557041 | NP_003624 | L | F | LF | benign            |
| rs11557045 | NP_058646 | R | H | RH | benign            |
| rs11557049 | NP_002594 | G | E | GE | probably damaging |
| rs11557049 | NP_002595 | G | E | GE | probably damaging |
| rs11557052 | NP_000691 | N | D | ND | benign            |
| rs11557058 | NP_000691 | V | A | VA | benign            |
| rs11557060 | NP_116136 | S | P | SP | possibly damaging |
| rs11557063 | XP_496349 | R | Q | RQ | benign            |
| rs11557064 | NP_057182 | L | I | LI | benign            |
| rs11557067 | NP_057182 | A | V | AV | possibly damaging |
| rs11557070 | NP_036380 | G | D | GD | benign            |
| rs11557087 | NP_006437 | T | A | TA | benign            |
| rs11557099 | NP_004159 | K | N | KN | probably damaging |
| rs11557102 | XP_496272 | E | D | ED | benign            |
| rs11557118 | NP_110409 | L | M | LM | benign            |
| rs11557120 | NP_077808 | V | A | VA | benign            |
| rs11557120 | NP_006573 | V | A | VA | benign            |
| rs11557141 | NP_057019 | E | G | EG | possibly damaging |
| rs11557142 | NP_006351 | L | F | LF | benign            |
| rs11557143 | NP_006351 | G | R | GR | possibly damaging |
| rs11557146 | NP_060952 | L | F | LF | benign            |
| rs11557148 | NP_057064 | F | S | FS | possibly damaging |
| rs11557151 | NP_037453 | R | Q | RQ | benign            |
| rs11557154 | NP_056212 | R | Q | RQ | possibly damaging |
| rs11557162 | NP_005403 | D | Y | DY | probably damaging |
| rs11557165 | NP_005403 | D | Y | DY | probably damaging |
| rs11557173 | NP_619713 | A | T | AT | benign            |
| rs11557173 | NP_001698 | A | T | AT | benign            |

|            |           |   |   |    |                   |
|------------|-----------|---|---|----|-------------------|
| rs11557182 | NP_001852 | S | P | SP | possibly damaging |
| rs11557185 | NP_001852 | Y | H | YH | possibly damaging |
| rs11557187 | XP_063336 | A | T | AT | benign            |
| rs11557189 | NP_001852 | F | L | FL | benign            |
| rs11557196 | NP_006828 | A | S | AS | benign            |
| rs11557198 | NP_006828 | L | M | LM | benign            |
| rs11557210 | XP_290944 | P | L | PL | probably damaging |
| rs11557217 | XP_375449 | E | D | ED | benign            |
| rs11557232 | NP_055563 | P | R | PR | probably damaging |
| rs11557236 | NP_065728 | T | I | TI | benign            |
| rs11557248 | NP_068810 | R | L | RL | possibly damaging |
| rs11557260 | XP_290704 | P | T | PT | probably damaging |
| rs11557264 | NP_001440 | R | L | RL | probably damaging |
| rs11557265 | NP_001440 | C | R | CR | probably damaging |
| rs11557267 | NP_001440 | H | R | HR | probably damaging |
| rs11557268 | NP_002412 | R | S | RS | benign            |
| rs11557271 | NP_976049 | Q | R | QR | possibly damaging |
| rs11557286 | NP_003162 | E | G | EG | possibly damaging |
| rs11557302 | NP_006419 | D | E | DE | benign            |
| rs11557303 | NP_006419 | Y | C | YC | benign            |
| rs11557304 | NP_612565 | G | V | GV | probably damaging |
| rs11557304 | NP_004847 | G | V | GV | probably damaging |
| rs11557312 | NP_005919 | S | T | ST | benign            |
| rs11557327 | NP_064539 | P | Q | PQ | possibly damaging |
| rs11557333 | NP_060386 | G | D | GD | possibly damaging |
| rs11557339 | NP_115865 | P | H | PH | probably damaging |
| rs11557348 | NP_001460 | M | I | MI | benign            |
| rs11557351 | NP_001460 | Q | R | QR | benign            |
| rs11557352 | XP_372262 | E | V | EV | probably damaging |
| rs11557355 | NP_001460 | D | Y | DY | probably damaging |
| rs11557357 | NP_005132 | E | G | EG | possibly damaging |
| rs11557361 | NP_612373 | C | Y | CY | probably damaging |
| rs11557372 | NP_954994 | E | K | EK | benign            |
| rs11557372 | NP_954995 | E | K | EK | benign            |
| rs11557382 | NP_002787 | S | L | SL | benign            |
| rs11557384 | NP_002787 | R | W | RW | possibly damaging |
| rs11557386 | NP_002787 | G | R | GR | benign            |
| rs11557387 | NP_002787 | G | S | GS | benign            |
| rs11557388 | NP_002787 | D | E | DE | benign            |
| rs11557394 | XP_495848 | D | G | DG | probably damaging |
| rs11557397 | NP_003637 | P | T | PT | benign            |
| rs11557397 | NP_963291 | P | T | PT | benign            |
| rs11557397 | NP_963290 | P | T | PT | benign            |
| rs11557404 | NP_000988 | G | C | GC | probably damaging |
| rs11557408 | NP_057122 | V | M | VM | benign            |
| rs11557409 | NP_057122 | R | H | RH | possibly damaging |

|            |           |   |   |    |                   |
|------------|-----------|---|---|----|-------------------|
| rs11557427 | NP_660308 | R | H | RH | probably damaging |
| rs11557437 | NP_004675 | S | Y | SY | probably damaging |
| rs11557441 | NP_001485 | K | T | KT | probably damaging |
| rs11557445 | NP_001485 | G | V | GV | probably damaging |
| rs11557447 | NP_001485 | T | N | TN | benign            |
| rs11557449 | NP_066553 | S | P | SP | possibly damaging |
| rs11557467 | NP_942141 | S | I | SI | possibly damaging |
| rs11557467 | NP_955353 | S | I | SI | possibly damaging |
| rs11557470 | XP_058961 | G | C | GC | probably damaging |
| rs11557482 | NP_002900 | D | G | DG | possibly damaging |
| rs11557505 | NP_061899 | L | V | LV | benign            |
| rs11557509 | NP_054884 | K | E | KE | benign            |
| rs11557516 | NP_006023 | P | H | PH | probably damaging |
| rs11557533 | NP_001987 | Q | H | QH | possibly damaging |
| rs11557540 | NP_000875 | D | G | DG | possibly damaging |
| rs11557551 | NP_079514 | C | S | CS | benign            |
| rs11557556 | XP_376201 | L | P | LP | possibly damaging |
| rs11557560 | NP_542784 | K | I | KI | benign            |
| rs11557561 | NP_542784 | D | N | DN | benign            |
| rs11557600 | NP_000346 | G | S | GS | benign            |
| rs11557614 | NP_000198 | A | V | AV | possibly damaging |
| rs11557617 | NP_932172 | P | S | PS | possibly damaging |
| rs11557628 | NP_060786 | S | R | SR | benign            |
| rs11557631 | NP_057375 | H | L | HL | probably damaging |
| rs11557632 | NP_057375 | V | F | VF | possibly damaging |
| rs11557640 | NP_009045 | M | V | MV | possibly damaging |
| rs11557648 | NP_036205 | P | L | PL | probably damaging |
| rs11557652 | NP_036205 | E | V | EV | possibly damaging |
| rs11557653 | NP_036205 | N | H | NH | probably damaging |
| rs11557654 | NP_036205 | D | H | DH | probably damaging |
| rs11557655 | NP_036205 | P | Q | PQ | benign            |
| rs11557656 | NP_036205 | D | N | DN | benign            |
| rs11557664 | NP_005539 | H | Y | HY | probably damaging |
| rs11557665 | NP_005539 | G | A | GA | possibly damaging |
| rs11557667 | NP_005539 | P | T | PT | probably damaging |
| rs11557669 | NP_005539 | E | Q | EQ | benign            |
| rs11557672 | NP_064709 | A | E | AE | benign            |
| rs11557676 | NP_006689 | K | R | KR | benign            |
| rs11557677 | NP_006689 | Y | C | YC | probably damaging |
| rs11557681 | XP_371681 | M | T | MT | probably damaging |
| rs11557684 | NP_061895 | P | S | PS | probably damaging |
| rs11557686 | NP_060853 | A | S | AS | benign            |
| rs11557693 | NP_071739 | R | L | RL | probably damaging |
| rs11557705 | NP_689755 | I | T | IT | possibly damaging |
| rs11557717 | NP_056002 | T | A | TA | benign            |
| rs11557723 | NP_077320 | E | A | EA | possibly damaging |

|            |           |   |   |    |                   |
|------------|-----------|---|---|----|-------------------|
| rs11557723 | NP_997630 | E | A | EA | possibly damaging |
| rs11557723 | NP_775111 | E | A | EA | possibly damaging |
| rs11557724 | NP_852004 | P | S | PS | probably damaging |
| rs11557724 | NP_000556 | P | S | PS | probably damaging |
| rs11557725 | NP_852004 | L | R | LR | possibly damaging |
| rs11557725 | NP_000556 | L | R | LR | possibly damaging |
| rs11557754 | NP_005689 | R | K | RK | benign            |
| rs11557754 | NP_443069 | R | K | RK | benign            |
| rs11557761 | NP_002036 | A | V | AV | benign            |
| rs11557762 | NP_002036 | K | E | KE | possibly damaging |
| rs11557763 | NP_002036 | D | E | DE | possibly damaging |
| rs11557764 | NP_002036 | K | E | KE | possibly damaging |
| rs11557765 | NP_002036 | E | K | EK | benign            |
| rs11557769 | NP_001093 | T | S | TS | benign            |
| rs11557794 | NP_003229 | N | Y | NY | probably damaging |
| rs11557803 | NP_055186 | M | T | MT | probably damaging |
| rs11557808 | NP_659005 | F | S | FS | possibly damaging |
| rs11557808 | NP_002589 | F | S | FS | probably damaging |
| rs11557810 | NP_115569 | P | L | PL | probably damaging |
| rs11557818 | NP_003079 | S | F | SF | possibly damaging |
| rs11557819 | NP_003079 | P | H | PH | possibly damaging |
| rs11557821 | NP_003079 | G | S | GS | benign            |
| rs11557833 | NP_114381 | P | H | PH | probably damaging |
| rs11557833 | NP_071496 | P | H | PH | probably damaging |
| rs11557839 | NP_919307 | K | R | KR | benign            |
| rs11557841 | NP_002070 | Q | R | QR | benign            |
| rs11557869 | XP_086494 | E | G | EG | possibly damaging |
| rs11557872 | XP_086494 | S | P | SP | possibly damaging |
| rs11557878 | XP_086494 | L | I | LI | benign            |
| rs11557881 | NP_000020 | A | V | AV | benign            |
| rs11557882 | NP_000020 | K | E | KE | benign            |
| rs11557883 | NP_000020 | S | F | SF | possibly damaging |
| rs11557900 | NP_004701 | L | V | LV | benign            |
| rs11557901 | NP_004701 | P | H | PH | possibly damaging |
| rs11557909 | NP_443078 | L | S | LS | benign            |
| rs11557910 | NP_612410 | R | W | RW | possibly damaging |
| rs11557920 | NP_055184 | L | P | LP | benign            |
| rs11557921 | NP_005337 | D | Y | DY | benign            |
| rs11557921 | NP_005336 | D | Y | DY | benign            |
| rs11557924 | NP_005337 | I | T | IT | benign            |
| rs11557924 | NP_005336 | I | T | IT | benign            |
| rs11558038 | NP_005685 | P | T | PT | probably damaging |
| rs11558040 | NP_005685 | P | L | PL | probably damaging |
| rs11558044 | XP_294311 | L | P | LP | probably damaging |
| rs11558046 | NP_005331 | E | A | EA | probably damaging |
| rs11558065 | NP_006000 | E | K | EK | possibly damaging |

|            |           |   |   |    |                   |
|------------|-----------|---|---|----|-------------------|
| rs11558073 | NP_006000 | S | Y | SY | probably damaging |
| rs11558077 | NP_116093 | P | Q | PQ | probably damaging |
| rs11558078 | NP_694966 | Q | P | QP | probably damaging |
| rs11558079 | NP_694966 | I | R | IR | possibly damaging |
| rs11558083 | XP_290722 | T | S | TS | benign            |
| rs11558085 | NP_005852 | Q | R | QR | benign            |
| rs11558088 | NP_073732 | G | V | GV | possibly damaging |
| rs11558089 | NP_073732 | V | G | VG | probably damaging |
| rs11558091 | NP_073732 | I | T | IT | possibly damaging |
| rs11558096 | NP_056028 | F | L | FL | probably damaging |
| rs11558103 | NP_006004 | G | R | GR | probably damaging |
| rs11558116 | NP_006004 | C | F | CF | probably damaging |
| rs11558119 | NP_006004 | F | L | FL | benign            |
| rs11558125 | XP_371781 | L | M | LM | benign            |
| rs11558135 | NP_004550 | T | M | TM | benign            |
| rs11558139 | NP_055686 | N | S | NS | benign            |
| rs11558142 | NP_055686 | R | H | RH | possibly damaging |
| rs11558144 | NP_003147 | D | N | DN | benign            |
| rs11558146 | NP_001514 | K | R | KR | benign            |
| rs11558156 | NP_057009 | V | I | VI | benign            |
| rs11558156 | NP_991403 | V | I | VI | benign            |
| rs11558156 | NP_991404 | V | I | VI | benign            |
| rs11558171 | NP_002071 | A | S | AS | benign            |
| rs11558175 | NP_079415 | L | F | LF | benign            |
| rs11558176 | NP_003485 | E | G | EG | possibly damaging |
| rs11558178 | NP_003485 | L | V | LV | benign            |
| rs11558180 | NP_064560 | P | S | PS | possibly damaging |
| rs11558182 | NP_055862 | A | T | AT | benign            |
| rs11558184 | NP_000148 | R | Q | RQ | benign            |
| rs11558190 | NP_114107 | Q | R | QR | benign            |
| rs11558195 | NP_001810 | T | M | TM | benign            |
| rs11558200 | NP_775817 | M | V | MV | benign            |
| rs11558228 | NP_005653 | G | W | GW | probably damaging |
| rs11558232 | NP_695021 | I | V | IV | benign            |
| rs11558235 | NP_002701 | C | R | CR | probably damaging |
| rs11558237 | NP_002701 | F | S | FS | probably damaging |
| rs11558239 | NP_002701 | K | E | KE | benign            |
| rs11558249 | NP_002849 | Y | C | YC | possibly damaging |
| rs11558250 | NP_002849 | M | V | MV | benign            |
| rs11558259 | NP_000286 | Q | R | QR | possibly damaging |
| rs11558261 | NP_000286 | G | S | GS | benign            |
| rs11558262 | NP_000286 | T | A | TA | benign            |
| rs11558263 | NP_000286 | S | R | SR | benign            |
| rs11558264 | NP_000286 | K | Q | KQ | benign            |
| rs11558269 | NP_003746 | T | I | TI | possibly damaging |
| rs11558272 | NP_003746 | A | V | AV | benign            |



|            |           |   |   |    |                   |
|------------|-----------|---|---|----|-------------------|
| rs11558276 | NP_006049 | M | L | ML | benign            |
| rs11558286 | NP_002491 | Y | F | YF | benign            |
| rs11558290 | NP_060765 | Q | E | QE | benign            |
| rs11558302 | NP_002255 | E | Q | EQ | possibly damaging |
| rs11558305 | NP_005547 | P | L | PL | benign            |
| rs11558306 | NP_005547 | A | S | AS | benign            |
| rs11558326 | NP_037508 | A | P | AP | benign            |
| rs11558332 | NP_002292 | D | V | DV | probably damaging |
| rs11558332 | NP_059144 | D | V | DV | probably damaging |
| rs11558333 | NP_002292 | G | S | GS | probably damaging |
| rs11558333 | NP_059144 | G | S | GS | probably damaging |
| rs11558350 | NP_002645 | V | G | VG | probably damaging |
| rs11558350 | NP_872270 | V | G | VG | probably damaging |
| rs11558353 | NP_002645 | V | L | VL | benign            |
| rs11558353 | NP_872270 | V | L | VL | benign            |
| rs11558353 | NP_872271 | V | L | VL | benign            |
| rs11558357 | NP_002645 | R | P | RP | benign            |
| rs11558357 | NP_872270 | R | P | RP | benign            |
| rs11558357 | NP_872271 | R | P | RP | benign            |
| rs11558360 | NP_002645 | E | K | EK | possibly damaging |
| rs11558360 | NP_872270 | E | K | EK | possibly damaging |
| rs11558360 | NP_872271 | E | K | EK | possibly damaging |
| rs11558365 | NP_002645 | Q | H | QH | probably damaging |
| rs11558365 | NP_872270 | Q | H | QH | probably damaging |
| rs11558365 | NP_872271 | Q | H | QH | probably damaging |
| rs11558370 | NP_002645 | Q | P | QP | probably damaging |
| rs11558370 | NP_872270 | Q | P | QP | probably damaging |
| rs11558370 | NP_872271 | Q | P | QP | probably damaging |
| rs11558375 | NP_002645 | C | F | CF | probably damaging |
| rs11558375 | NP_872270 | C | F | CF | probably damaging |
| rs11558375 | NP_872271 | C | F | CF | probably damaging |
| rs11558389 | XP_048070 | C | R | CR | benign            |
| rs11558395 | NP_066964 | D | G | DG | benign            |
| rs11558400 | NP_055048 | T | I | TI | possibly damaging |
| rs11558415 | XP_061055 | M | I | MI | benign            |
| rs11558422 | NP_002130 | P | S | PS | benign            |
| rs11558424 | XP_497012 | P | R | PR | probably damaging |
| rs11558426 | NP_002130 | F | L | FL | possibly damaging |
| rs11558433 | NP_116056 | L | S | LS | benign            |
| rs11558440 | NP_002559 | L | F | LF | possibly damaging |
| rs11558453 | NP_055687 | A | T | AT | benign            |
| rs11558473 | NP_005479 | R | H | RH | possibly damaging |
| rs11558482 | NP_004759 | A | S | AS | benign            |
| rs11558492 | NP_055051 | D | G | DG | benign            |
| rs11558495 | NP_055051 | S | P | SP | benign            |
| rs11558511 | NP_060912 | V | A | VA | benign            |

|            |           |   |   |    |                   |
|------------|-----------|---|---|----|-------------------|
| rs11558529 | NP_002880 | G | C | GC | probably damaging |
| rs11558534 | NP_079358 | S | R | SR | benign            |
| rs11558535 | NP_079358 | P | A | PA | probably damaging |
| rs11558539 | NP_057187 | A | V | AV | benign            |
| rs11558550 | NP_005956 | A | T | AT | benign            |
| rs11558550 | NP_444254 | A | T | AT | benign            |
| rs11558550 | NP_444255 | A | T | AT | benign            |
| rs11558550 | NP_444256 | A | T | AT | benign            |
| rs11558550 | NP_444257 | A | T | AT | benign            |
| rs11558550 | NP_444258 | A | T | AT | benign            |
| rs11558550 | NP_444253 | A | T | AT | benign            |
| rs11558570 | NP_940888 | I | T | IT | possibly damaging |
| rs11558580 | NP_005820 | N | S | NS | possibly damaging |
| rs11558585 | NP_115595 | S | P | SP | benign            |
| rs11558585 | NP_002468 | E | G | EG | possibly damaging |
| rs11558595 | NP_000933 | V | L | VL | benign            |
| rs11558603 | NP_742097 | R | C | RC | probably damaging |
| rs11558603 | NP_742099 | R | C | RC | probably damaging |
| rs11558603 | NP_742100 | R | C | RC | probably damaging |
| rs11558603 | NP_757362 | R | C | RC | probably damaging |
| rs11558603 | NP_004922 | R | C | RC | probably damaging |
| rs11558603 | NP_742098 | R | C | RC | probably damaging |
| rs11558612 | NP_005785 | D | G | DG | possibly damaging |
| rs11558612 | NP_878912 | D | G | DG | possibly damaging |
| rs11558627 | NP_006451 | Q | H | QH | benign            |
| rs11558671 | NP_055066 | V | L | VL | benign            |
| rs11558673 | NP_055066 | S | Y | SY | possibly damaging |
| rs11558676 | NP_006539 | P | S | PS | benign            |
| rs11558679 | NP_060701 | G | R | GR | probably damaging |
| rs11558680 | NP_060701 | C | F | CF | probably damaging |
| rs11558687 | NP_056257 | T | S | TS | benign            |
| rs11558688 | NP_005501 | R | G | RG | possibly damaging |
| rs11558689 | NP_005501 | T | A | TA | benign            |
| rs11558722 | NP_598005 | T | I | TI | benign            |
| rs11558725 | NP_006487 | A | T | AT | benign            |
| rs11558744 | NP_002764 | S | G | SG | benign            |
| rs11558749 | NP_000357 | Q | K | QK | benign            |
| rs11558752 | NP_005167 | D | H | DH | probably damaging |
| rs11558767 | NP_689718 | G | S | GS | benign            |
| rs11558769 | NP_009126 | Y | N | YN | probably damaging |
| rs11558773 | NP_660306 | K | R | KR | benign            |
| rs11558777 | NP_001528 | E | G | EG | possibly damaging |
| rs11558783 | NP_695012 | R | H | RH | benign            |
| rs11558787 | NP_002612 | R | C | RC | probably damaging |
| rs11558792 | NP_076968 | D | N | DN | benign            |
| rs11558798 | NP_006657 | P | Q | PQ | probably damaging |

|            |           |   |   |    |                   |
|------------|-----------|---|---|----|-------------------|
| rs11558805 | NP_009210 | D | H | DH | benign            |
| rs11558807 | NP_060615 | Q | H | QH | benign            |
| rs11558808 | NP_060615 | N | K | NK | benign            |
| rs11558818 | NP_003812 | P | H | PH | probably damaging |
| rs11558825 | NP_003708 | S | F | SF | benign            |
| rs11558836 | NP_059128 | L | P | LP | possibly damaging |
| rs11558840 | NP_057724 | N | S | NS | benign            |
| rs11558841 | NP_057724 | K | E | KE | benign            |
| rs11558843 | NP_036387 | R | P | RP | probably damaging |
| rs11558855 | NP_078969 | R | C | RC | possibly damaging |
| rs11558857 | NP_859525 | E | G | EG | probably damaging |
| rs11558857 | NP_859526 | E | G | EG | probably damaging |
| rs11558857 | NP_002543 | E | G | EG | probably damaging |
| rs11558872 | NP_005821 | A | V | AV | benign            |
| rs11558876 | NP_003339 | P | R | PR | probably damaging |
| rs11558904 | NP_000406 | A | P | AP | benign            |
| rs11558909 | NP_004999 | L | M | LM | benign            |
| rs11558933 | NP_114161 | E | G | EG | possibly damaging |
| rs11558934 | NP_004322 | S | Y | SY | benign            |
| rs11558936 | NP_004322 | P | R | PR | probably damaging |
| rs11558950 | NP_976050 | T | A | TA | benign            |
| rs11558955 | NP_005044 | T | A | TA | benign            |
| rs11558963 | NP_055037 | L | P | LP | possibly damaging |
| rs11558978 | NP_056359 | I | V | IV | benign            |
| rs11558979 | NP_612352 | R | H | RH | benign            |
| rs11558979 | NP_958929 | R | H | RH | possibly damaging |
| rs11558979 | NP_958930 | R | H | RH | possibly damaging |
| rs11558979 | NP_958931 | R | H | RH | possibly damaging |
| rs11558982 | NP_001354 | S | P | SP | possibly damaging |
| rs11558984 | NP_056134 | A | T | AT | benign            |
| rs11558984 | NP_736610 | A | T | AT | benign            |
| rs11558984 | NP_938072 | A | T | AT | benign            |
| rs11558989 | NP_037473 | P | H | PH | probably damaging |
| rs11559006 | NP_115727 | S | P | SP | benign            |
| rs11559016 | NP_000720 | R | H | RH | possibly damaging |
| rs11559017 | NP_060268 | M | I | MI | possibly damaging |
| rs11559018 | NP_444252 | L | V | LV | benign            |
| rs11559018 | NP_002619 | L | V | LV | benign            |
| rs11559022 | NP_444252 | L | P | LP | probably damaging |
| rs11559022 | NP_002619 | L | P | LP | probably damaging |
| rs11559024 | NP_001815 | E | G | EG | probably damaging |
| rs11559036 | NP_005875 | K | N | KN | probably damaging |
| rs11559037 | NP_005875 | M | I | MI | possibly damaging |
| rs11559042 | NP_110417 | A | T | AT | benign            |
| rs11559043 | NP_110417 | E | D | ED | benign            |
| rs11559044 | NP_110417 | A | T | AT | benign            |

|            |           |   |   |    |                   |
|------------|-----------|---|---|----|-------------------|
| rs11559048 | NP_671514 | R | W | RW | probably damaging |
| rs11559048 | NP_005857 | R | W | RW | probably damaging |
| rs11559048 | NP_671513 | R | W | RW | probably damaging |
| rs11559053 | NP_006779 | K | E | KE | benign            |
| rs11559061 | NP_056203 | F | L | FL | possibly damaging |
| rs11559062 | NP_056203 | L | F | LF | benign            |
| rs11559063 | NP_056203 | G | S | GS | possibly damaging |
| rs11559064 | NP_056203 | A | P | AP | benign            |
| rs11559071 | NP_938149 | I | F | IF | benign            |
| rs11559071 | NP_938148 | I | F | IF | possibly damaging |
| rs11559072 | NP_938149 | P | L | PL | probably damaging |
| rs11559072 | NP_055425 | P | L | PL | probably damaging |
| rs11559072 | NP_938148 | P | L | PL | probably damaging |
| rs11559080 | NP_115509 | L | M | LM | benign            |
| rs11559081 | NP_057581 | L | F | LF | benign            |
| rs11559083 | NP_057581 | P | L | PL | probably damaging |
| rs11559084 | NP_057581 | R | H | RH | possibly damaging |
| rs11559087 | NP_055150 | P | S | PS | possibly damaging |
| rs11559092 | XP_497550 | F | L | FL | benign            |
| rs11559093 | XP_497550 | A | T | AT | benign            |
| rs11559094 | NP_001976 | V | M | VM | benign            |
| rs11559096 | NP_005266 | P | H | PH | probably damaging |
| rs11559104 | NP_057616 | D | N | DN | benign            |
| rs11559113 | NP_996734 | L | V | LV | benign            |
| rs11559113 | NP_996739 | L | V | LV | benign            |
| rs11559132 | NP_758516 | Y | C | YC | probably damaging |
| rs11559132 | NP_036568 | Y | C | YC | probably damaging |
| rs11559133 | NP_758516 | T | A | TA | benign            |
| rs11559134 | NP_689775 | S | L | SL | benign            |
| rs11559137 | NP_937782 | E | G | EG | possibly damaging |
| rs11559137 | NP_002998 | E | G | EG | possibly damaging |
| rs11559138 | NP_937782 | L | P | LP | benign            |
| rs11559138 | NP_002998 | L | P | LP | benign            |
| rs11559143 | NP_003062 | P | R | PR | possibly damaging |
| rs11559143 | NP_620636 | P | R | PR | possibly damaging |
| rs11559154 | NP_004205 | R | W | RW | probably damaging |
| rs11559154 | NP_942600 | R | W | RW | probably damaging |
| rs11559155 | NP_004205 | P | S | PS | probably damaging |
| rs11559155 | NP_942600 | P | S | PS | probably damaging |
| rs11559156 | NP_006727 | P | L | PL | probably damaging |
| rs11559159 | NP_065385 | W | G | WG | probably damaging |
| rs11559174 | NP_542397 | E | G | EG | benign            |
| rs11559179 | NP_006816 | R | C | RC | possibly damaging |
| rs11559188 | NP_064615 | Q | R | QR | benign            |
| rs11559191 | NP_064615 | H | P | HP | probably damaging |
| rs11559199 | NP_116259 | G | A | GA | benign            |

|            |           |   |   |    |                   |
|------------|-----------|---|---|----|-------------------|
| rs11559204 | NP_002371 | K | R | KR | benign            |
| rs11559204 | NP_085072 | K | R | KR | benign            |
| rs11559205 | NP_997229 | I | L | IL | benign            |
| rs11559206 | NP_997229 | Q | E | QE | benign            |
| rs11559208 | NP_001278 | K | E | KE | benign            |
| rs11559216 | NP_004944 | A | P | AP | benign            |
| rs11559216 | NP_886553 | A | P | AP | benign            |
| rs11559216 | NP_937884 | A | P | AP | benign            |
| rs11559216 | NP_937885 | A | P | AP | benign            |
| rs11559216 | NP_937887 | A | P | AP | benign            |
| rs11559221 | NP_065172 | L | M | LM | benign            |
| rs11559228 | NP_945179 | L | V | LV | benign            |
| rs11559232 | NP_945179 | L | I | LI | benign            |
| rs11559242 | NP_000775 | D | N | DN | benign            |
| rs11559274 | NP_005491 | Q | H | QH | possibly damaging |
| rs11559276 | NP_005491 | D | G | DG | possibly damaging |
| rs11559278 | NP_005491 | N | H | NH | benign            |
| rs11559281 | NP_000172 | P | T | PT | possibly damaging |
| rs11559283 | NP_000172 | L | F | LF | benign            |
| rs11559290 | NP_004444 | I | T | IT | benign            |
| rs11559294 | NP_004332 | E | G | EG | benign            |
| rs11559295 | NP_065806 | L | M | LM | benign            |
| rs11559296 | NP_065806 | P | R | PR | probably damaging |
| rs11559300 | NP_005265 | S | G | SG | benign            |
| rs11559304 | NP_006436 | R | H | RH | benign            |
| rs11559306 | NP_006436 | P | S | PS | benign            |
| rs11559315 | NP_006815 | S | F | SF | possibly damaging |
| rs11559316 | NP_006815 | P | R | PR | probably damaging |
| rs11559320 | NP_000983 | A | T | AT | benign            |
| rs11559324 | NP_000983 | I | F | IF | benign            |
| rs11559329 | NP_000983 | P | Q | PQ | benign            |
| rs11563246 | XP_371603 | K | N | KN | benign            |
| rs11564148 | XP_058513 | S | T | ST | benign            |
| rs11564522 | NP_003697 | E | K | EK | benign            |
| rs11564532 | NP_003697 | A | V | AV | benign            |
| rs11564534 | NP_003697 | V | F | VF | benign            |
| rs11564538 | NP_003697 | P | L | PL | benign            |
| rs11564541 | NP_003697 | T | S | TS | benign            |
| rs11564620 | NP_003697 | T | P | TP | benign            |
| rs11564638 | NP_003697 | D | N | DN | benign            |
| rs11565649 | XP_210365 | T | I | TI | possibly damaging |
| rs11565653 | NP_060651 | E | D | ED | benign            |
| rs11566450 | XP_376278 | F | L | FL | benign            |
| rs11567735 | NP_002176 | E | D | ED | benign            |
| rs11567806 | NP_004045 | V | A | VA | possibly damaging |
| rs11567841 | NP_005347 | G | S | GS | benign            |

|            |           |   |   |    |                   |
|------------|-----------|---|---|----|-------------------|
| rs11567847 | NP_068780 | Y | H | YH | possibly damaging |
| rs11567901 | NP_002042 | G | S | GS | benign            |
| rs11567962 | NP_001781 | S | N | SN | benign            |
| rs11567997 | NP_073720 | G | R | GR | probably damaging |
| rs11567997 | NP_001781 | G | R | GR | probably damaging |
| rs11568032 | NP_000020 | E | K | EK | benign            |
| rs11568053 | NP_000020 | M | I | MI | possibly damaging |
| rs11568099 | NP_001131 | N | K | NK | benign            |
| rs11568101 | NP_001131 | R | Q | RQ | benign            |
| rs11568142 | NP_001131 | D | H | DH | benign            |
| rs11568178 | NP_055981 | V | I | VI | benign            |
| rs11568178 | NP_631941 | V | I | VI | benign            |
| rs11568188 | NP_055981 | N | S | NS | benign            |
| rs11568188 | NP_631941 | N | S | NS | benign            |
| rs11568312 | NP_003860 | A | T | AT | benign            |
| rs11568312 | NP_932327 | A | T | AT | benign            |
| rs11568323 | NP_001034 | N | K | NK | benign            |
| rs11568325 | NP_001034 | T | R | TR | probably damaging |
| rs11568341 | NP_001034 | V | I | VI | benign            |
| rs11568346 | NP_055400 | R | G | RG | benign            |
| rs11568350 | NP_055400 | Q | H | QH | benign            |
| rs11568353 | NP_055400 | P | L | PL | benign            |
| rs11568355 | NP_055400 | M | V | MV | possibly damaging |
| rs11568357 | NP_003733 | I | V | IV | benign            |
| rs11568361 | NP_003733 | S | L | SL | benign            |
| rs11568364 | NP_003733 | M | V | MV | benign            |
| rs11568367 | NP_003733 | N | S | NS | possibly damaging |
| rs11568369 | NP_003733 | Q | H | QH | possibly damaging |
| rs11568370 | NP_003733 | E | Q | EQ | benign            |
| rs11568372 | NP_003733 | E | G | EG | probably damaging |
| rs11568386 | NP_071410 | R | Q | RQ | benign            |
| rs11568388 | NP_071410 | G | R | GR | probably damaging |
| rs11568398 | NP_071410 | R | H | RH | benign            |
| rs11568401 | NP_071410 | R | K | RK | benign            |
| rs11568403 | NP_071410 | S | N | SN | benign            |
| rs11568405 | NP_071410 | L | I | LI | benign            |
| rs11568411 | NP_071410 | R | K | RK | benign            |
| rs11568412 | NP_071410 | D | H | DH | benign            |
| rs11568418 | NP_071410 | I | V | IV | benign            |
| rs11568423 | NP_003973 | R | Q | RQ | possibly damaging |
| rs11568424 | NP_003973 | F | S | FS | probably damaging |
| rs11568432 | NP_003973 | Y | C | YC | probably damaging |
| rs11568437 | NP_003973 | R | C | RC | probably damaging |
| rs11568438 | NP_003973 | V | A | VA | benign            |
| rs11568441 | NP_003975 | A | P | AP | benign            |
| rs11568442 | NP_003975 | P | S | PS | possibly damaging |

|            |           |   |   |    |                   |
|------------|-----------|---|---|----|-------------------|
| rs11568454 | NP_003975 | I | V | IV | benign            |
| rs11568461 | NP_003975 | F | L | FL | probably damaging |
| rs11568463 | NP_003975 | V | I | VI | benign            |
| rs11568467 | NP_003975 | L | F | LF | benign            |
| rs11568476 | NP_003975 | V | M | VM | possibly damaging |
| rs11568479 | NP_004245 | F | L | FL | possibly damaging |
| rs11568481 | NP_004245 | A | V | AV | benign            |
| rs11568482 | NP_004245 | I | F | IF | possibly damaging |
| rs11568486 | NP_004245 | V | I | VI | benign            |
| rs11568489 | NP_004245 | R | S | RS | probably damaging |
| rs11568491 | NP_004245 | V | A | VA | benign            |
| rs11568492 | NP_004245 | R | W | RW | probably damaging |
| rs11568493 | NP_004245 | I | R | IR | possibly damaging |
| rs11568497 | NP_004245 | A | S | AS | benign            |
| rs11568500 | NP_003050 | M | I | MI | probably damaging |
| rs11568509 | NP_003050 | V | M | VM | benign            |
| rs11568510 | NP_003050 | D | G | DG | probably damaging |
| rs11568513 | NP_003051 | V | F | VF | possibly damaging |
| rs11568514 | NP_003051 | Y | D | YD | possibly damaging |
| rs11568520 | NP_003051 | F | L | FL | possibly damaging |
| rs11568521 | NP_003051 | F | L | FL | benign            |
| rs11568524 | NP_003051 | M | V | MV | benign            |
| rs11568525 | NP_003051 | P | S | PS | probably damaging |
| rs11568527 | NP_647480 | T | I | TI | possibly damaging |
| rs11568530 | NP_647480 | A | T | AT | benign            |
| rs11568543 | NP_647480 | G | E | GE | probably damaging |
| rs11568548 | NP_647480 | P | L | PL | benign            |
| rs11568551 | NP_602307 | I | V | IV | benign            |
| rs11568553 | NP_602307 | T | N | TN | benign            |
| rs11568557 | NP_602307 | T | S | TS | benign            |
| rs11568563 | NP_602307 | E | D | ED | benign            |
| rs11568564 | NP_602307 | R | C | RC | possibly damaging |
| rs11568564 | NP_005066 | R | C | RC | probably damaging |
| rs11568566 | NP_005066 | N | I | NI | probably damaging |
| rs11568566 | NP_602307 | N | I | NI | probably damaging |
| rs11568567 | NP_602307 | N | Y | NY | probably damaging |
| rs11568578 | NP_602307 | I | V | IV | benign            |
| rs11568579 | NP_602307 | L | P | LP | possibly damaging |
| rs11568580 | NP_064421 | S | I | SI | possibly damaging |
| rs11568580 | NP_003777 | S | I | SI | possibly damaging |
| rs11568584 | NP_064421 | K | M | KM | benign            |
| rs11568584 | NP_003777 | K | M | KM | possibly damaging |
| rs11568588 | NP_003777 | R | C | RC | benign            |
| rs11568590 | NP_003777 | Q | R | QR | benign            |
| rs11568591 | NP_003777 | R | H | RH | possibly damaging |
| rs11568593 | NP_003777 | R | G | RG | possibly damaging |

|            |           |   |   |    |                   |
|------------|-----------|---|---|----|-------------------|
| rs11568597 | NP_003777 | R | S | RS | probably damaging |
| rs11568605 | NP_064421 | S | F | SF | benign            |
| rs11568605 | NP_003777 | S | F | SF | benign            |
| rs11568608 | NP_064421 | S | N | SN | benign            |
| rs11568608 | NP_003777 | S | N | SN | benign            |
| rs11568609 | NP_064421 | G | D | GD | benign            |
| rs11568609 | NP_003777 | G | D | GD | benign            |
| rs11568612 | NP_695011 | R | W | RW | benign            |
| rs11568612 | NP_004781 | R | W | RW | benign            |
| rs11568612 | NP_695008 | R | W | RW | benign            |
| rs11568612 | NP_695010 | R | W | RW | benign            |
| rs11568612 | NP_695009 | R | W | RW | benign            |
| rs11568623 | NP_695011 | I | T | IT | benign            |
| rs11568623 | NP_004781 | I | T | IT | benign            |
| rs11568623 | NP_695008 | I | T | IT | benign            |
| rs11568623 | NP_695010 | I | T | IT | benign            |
| rs11568623 | NP_695009 | I | T | IT | benign            |
| rs11568624 | NP_695011 | A | V | AV | benign            |
| rs11568624 | NP_004781 | A | V | AV | benign            |
| rs11568624 | NP_695008 | A | V | AV | benign            |
| rs11568624 | NP_695010 | A | V | AV | benign            |
| rs11568624 | NP_695009 | A | V | AV | benign            |
| rs11568626 | NP_695011 | R | H | RH | possibly damaging |
| rs11568626 | NP_004781 | R | H | RH | possibly damaging |
| rs11568626 | NP_695008 | R | H | RH | possibly damaging |
| rs11568626 | NP_695010 | R | H | RH | possibly damaging |
| rs11568626 | NP_695009 | R | H | RH | possibly damaging |
| rs11568627 | NP_695011 | P | L | PL | probably damaging |
| rs11568627 | NP_004781 | P | L | PL | probably damaging |
| rs11568627 | NP_695008 | P | L | PL | probably damaging |
| rs11568627 | NP_695010 | P | L | PL | probably damaging |
| rs11568627 | NP_695009 | P | L | PL | probably damaging |
| rs11568634 | NP_695011 | R | Q | RQ | benign            |
| rs11568634 | NP_004781 | R | Q | RQ | benign            |
| rs11568634 | NP_695010 | R | H | RH | possibly damaging |
| rs11568634 | NP_695009 | R | H | RH | possibly damaging |
| rs11568634 | NP_695008 | R | Q | RQ | possibly damaging |
| rs11568639 | NP_005836 | R | Q | RQ | benign            |
| rs11568644 | NP_005836 | T | M | TM | possibly damaging |
| rs11568653 | NP_005836 | V | I | VI | benign            |
| rs11568657 | NP_005836 | M | T | MT | benign            |
| rs11568658 | NP_005836 | G | W | GW | probably damaging |
| rs11568659 | NP_005836 | R | I | RI | probably damaging |
| rs11568668 | NP_005836 | G | E | GE | probably damaging |
| rs11568669 | NP_005836 | K | E | KE | benign            |
| rs11568673 | NP_005836 | V | L | VL | benign            |



|            |           |   |   |    |                   |
|------------|-----------|---|---|----|-------------------|
| rs11568681 | NP_005836 | I | L | IL | benign            |
| rs11568684 | NP_005836 | K | E | KE | benign            |
| rs11568688 | NP_005836 | Q | R | QR | benign            |
| rs11568689 | NP_005836 | P | A | PA | probably damaging |
| rs11568692 | NP_005836 | V | M | VM | benign            |
| rs11568694 | NP_005836 | V | F | VF | possibly damaging |
| rs11568697 | NP_005836 | P | L | PL | benign            |
| rs11568699 | NP_005836 | I | M | IM | benign            |
| rs11568701 | NP_005836 | T | M | TM | benign            |
| rs11568705 | NP_005836 | P | L | PL | possibly damaging |
| rs11568707 | NP_005836 | C | S | CS | benign            |
| rs11568719 | NP_003045 | A | G | AG | benign            |
| rs11568728 | NP_000097 | G | E | GE | benign            |
| rs11568849 | NP_001954 | S | R | SR | possibly damaging |
| rs11568911 | NP_001954 | D | H | DH | possibly damaging |
| rs11568943 | NP_001954 | R | K | RK | benign            |
| rs11568992 | NP_001954 | S | R | SR | possibly damaging |
| rs11569017 | NP_001954 | D | V | DV | possibly damaging |
| rs11569046 | NP_001954 | M | T | MT | benign            |
| rs11569086 | NP_001954 | D | E | DE | benign            |
| rs11569098 | NP_001954 | L | F | LF | benign            |
| rs11569111 | NP_001954 | A | G | AG | benign            |
| rs11569200 | NP_006277 | P | S | PS | benign            |
| rs11569321 | NP_690593 | S | L | SL | benign            |
| rs11569321 | NP_001241 | S | L | SL | benign            |
| rs11569409 | NP_000055 | R | G | RG | benign            |
| rs11569422 | NP_000055 | E | D | ED | benign            |
| rs11569472 | NP_000055 | R | K | RK | benign            |
| rs11569534 | NP_000055 | G | D | GD | benign            |
| rs11569541 | NP_000055 | I | T | IT | possibly damaging |
| rs11569636 | NP_006218 | S | Y | SY | benign            |
| rs11569675 | NP_872617 | M | I | MI | benign            |
| rs11569675 | NP_006218 | M | I | MI | benign            |
| rs11569679 | NP_003158 | A | T | AT | benign            |
| rs11569680 | NP_003158 | K | E | KE | benign            |
| rs11569681 | NP_003158 | A | P | AP | benign            |
| rs11569703 | NP_005411 | A | V | AV | benign            |
| rs11569705 | NP_005411 | D | Y | DY | benign            |
| rs11569712 | NP_005411 | P | H | PH | probably damaging |
| rs11569729 | NP_055280 | T | M | TM | benign            |
| rs11569736 | NP_055280 | L | V | LV | benign            |
| rs11569738 | XP_497833 | K | R | KR | benign            |
| rs11569739 | XP_497833 | K | E | KE | benign            |
| rs11569740 | XP_497833 | V | D | VD | possibly damaging |
| rs11569743 | XP_497833 | A | T | AT | benign            |
| rs11569744 | XP_497833 | R | Q | RQ | benign            |

|            |           |   |   |    |                   |
|------------|-----------|---|---|----|-------------------|
| rs11569746 | XP_497833 | P | A | PA | possibly damaging |
| rs11569747 | XP_497833 | I | M | IM | benign            |
| rs11569757 | XP_497833 | R | S | RS | benign            |
| rs11569761 | XP_497833 | R | L | RL | possibly damaging |
| rs11569763 | NP_803564 | H | D | HD | probably damaging |
| rs11569763 | NP_001045 | H | D | HD | probably damaging |
| rs11569766 | NP_803564 | N | S | NS | probably damaging |
| rs11569766 | NP_001045 | N | S | NS | probably damaging |
| rs11569781 | NP_002677 | N | S | NS | benign            |
| rs11569782 | NP_002677 | T | A | TA | probably damaging |
| rs11569783 | NP_002677 | R | C | RC | benign            |
| rs11569892 | NP_001234 | C | Y | CY | probably damaging |
| rs11569913 | NP_001234 | S | G | SG | benign            |
| rs11570019 | NP_068658 | E | K | EK | benign            |
| rs11570019 | NP_004349 | E | K | EK | benign            |
| rs11570019 | NP_997695 | E | K | EK | benign            |
| rs11570019 | NP_068660 | E | K | EK | benign            |
| rs11570052 | NP_000247 | V | I | VI | benign            |
| rs11570060 | NP_000247 | R | Q | RQ | benign            |
| rs11570076 | NP_000247 | R | W | RW | probably damaging |
| rs11570077 | NP_000247 | L | V | LV | benign            |
| rs11570082 | NP_000247 | A | T | AT | benign            |
| rs11570112 | NP_000247 | Q | E | QE | benign            |
| rs11570113 | NP_000247 | R | C | RC | probably damaging |
| rs11570146 | NP_001183 | A | V | AV | benign            |
| rs11570147 | NP_001183 | I | V | IV | benign            |
| rs11570148 | NP_001183 | F | V | FV | possibly damaging |
| rs11570159 | NP_001183 | C | S | CS | benign            |
| rs11570194 | NP_001322 | Y | C | YC | probably damaging |
| rs11570199 | NP_001322 | R | C | RC | possibly damaging |
| rs11570222 | NP_001322 | R | K | RK | benign            |
| rs11570255 | NP_996916 | A | T | AT | benign            |
| rs11570255 | NP_996917 | A | T | AT | benign            |
| rs11570255 | NP_996915 | A | T | AT | benign            |
| rs11570351 | NP_996916 | A | T | AT | benign            |
| rs11570605 | NP_003551 | V | I | VI | benign            |
| rs11570606 | NP_003551 | R | G | RG | benign            |
| rs11570607 | NP_003551 | R | Q | RQ | possibly damaging |
| rs11570646 | NP_003551 | D | N | DN | possibly damaging |
| rs11570680 | NP_003551 | A | T | AT | benign            |
| rs11570814 | NP_004187 | L | P | LP | probably damaging |
| rs11570886 | NP_004187 | K | N | KN | benign            |
| rs11570895 | NP_000228 | A | V | AV | benign            |
| rs11571083 | NP_000528 | Q | K | QK | benign            |
| rs11571098 | NP_000528 | R | W | RW | probably damaging |
| rs11571117 | NP_000528 | G | R | GR | benign            |

|            |           |   |   |    |                   |
|------------|-----------|---|---|----|-------------------|
| rs11571143 | NP_000917 | A | T | AT | benign            |
| rs11571144 | NP_000917 | A | V | AV | benign            |
| rs11571145 | NP_000917 | P | L | PL | probably damaging |
| rs11571146 | NP_000917 | M | R | MR | probably damaging |
| rs11571147 | NP_000917 | C | S | CS | benign            |
| rs11571148 | NP_000917 | P | L | PL | probably damaging |
| rs11571149 | NP_000917 | S | R | SR | benign            |
| rs11571150 | NP_000917 | A | S | AS | benign            |
| rs11571151 | NP_000917 | V | L | VL | benign            |
| rs11571152 | NP_000917 | Q | P | QP | possibly damaging |
| rs11571222 | NP_000917 | L | V | LV | benign            |
| rs11571342 | NP_000688 | R | H | RH | possibly damaging |
| rs11571421 | NP_602296 | R | W | RW | probably damaging |
| rs11571421 | NP_602295 | R | W | RW | probably damaging |
| rs11571421 | NP_602294 | R | W | RW | probably damaging |
| rs11571512 | NP_775299 | P | S | PS | possibly damaging |
| rs11571512 | NP_777480 | P | S | PS | possibly damaging |
| rs11571512 | NP_733796 | P | S | PS | probably damaging |
| rs11571541 | NP_004015 | T | M | TM | possibly damaging |
| rs11571541 | NP_001665 | T | M | TM | possibly damaging |
| rs11571640 | NP_000050 | K | Q | KQ | benign            |
| rs11571653 | NP_000050 | M | V | MV | benign            |
| rs11571656 | NP_000050 | S | F | SF | possibly damaging |
| rs11571657 | NP_000050 | N | K | NK | benign            |
| rs11571659 | NP_000050 | V | F | VF | benign            |
| rs11571660 | NP_000050 | K | R | KR | benign            |
| rs11571707 | NP_000050 | I | T | IT | possibly damaging |
| rs11571746 | NP_000050 | S | P | SP | benign            |
| rs11571747 | NP_000050 | E | A | EA | possibly damaging |
| rs11571769 | NP_000050 | A | T | AT | benign            |
| rs11571831 | NP_000050 | V | I | VI | benign            |
| rs11571848 | NP_000720 | G | E | GE | benign            |
| rs11572006 | NP_001244 | Y | C | YC | possibly damaging |
| rs11572048 | NP_001244 | L | F | LF | benign            |
| rs11572080 | NP_110518 | R | K | RK | benign            |
| rs11572080 | NP_000761 | R | K | RK | benign            |
| rs11572102 | NP_110518 | I | V | IV | benign            |
| rs11572102 | NP_000761 | I | V | IV | benign            |
| rs11572103 | NP_110518 | I | F | IF | possibly damaging |
| rs11572103 | NP_000761 | I | F | IF | probably damaging |
| rs11572190 | NP_000766 | R | S | RS | benign            |
| rs11572242 | NP_000766 | V | M | VM | benign            |
| rs11572243 | NP_000766 | N | S | NS | possibly damaging |
| rs11572371 | NP_001947 | P | L | PL | benign            |
| rs11572693 | NP_996318 | T | M | TM | benign            |
| rs11572913 | NP_001507 | M | I | MI | benign            |

|            |           |   |   |    |                   |
|------------|-----------|---|---|----|-------------------|
| rs11573162 | NP_000291 | H | Y | HY | possibly damaging |
| rs11573578 | NP_003729 | E | Q | EQ | benign            |
| rs11573581 | NP_003729 | E | K | EK | benign            |
| rs11573586 | NP_003729 | H | Y | HY | possibly damaging |
| rs11573590 | NP_003729 | T | M | TM | possibly damaging |
| rs11573591 | NP_003729 | V | M | VM | benign            |
| rs11573598 | NP_003729 | I | M | IM | benign            |
| rs11573906 | NP_002537 | V | M | VM | benign            |
| rs11573986 | NP_003811 | G | E | GE | possibly damaging |
| rs11574090 | NP_000367 | L | V | LV | benign            |
| rs11574115 | NP_000367 | T | I | TI | benign            |
| rs11574151 | NP_037489 | E | A | EA | possibly damaging |
| rs11574153 | NP_037489 | S | G | SG | benign            |
| rs11574222 | NP_000544 | E | K | EK | benign            |
| rs11574240 | NP_000544 | N | S | NS | benign            |
| rs11574250 | NP_000544 | S | C | SC | possibly damaging |
| rs11574289 | NP_000544 | S | F | SF | possibly damaging |
| rs11574323 | NP_000544 | I | S | IS | possibly damaging |
| rs11574358 | NP_000544 | S | A | SA | benign            |
| rs11574395 | NP_000544 | V | I | VI | benign            |
| rs11574422 | NP_002326 | V | A | VA | benign            |
| rs11574443 | NP_003956 | Y | C | YC | probably damaging |
| rs11574476 | NP_079516 | A | T | AT | benign            |
| rs11574477 | NP_079516 | Q | L | QL | probably damaging |
| rs11574479 | NP_079516 | T | M | TM | benign            |
| rs11574512 | NP_057133 | A | V | AV | benign            |
| rs11574527 | NP_001188 | L | P | LP | possibly damaging |
| rs11574537 | NP_000880 | R | S | RS | benign            |
| rs11574542 | NP_000880 | G | E | GE | possibly damaging |
| rs11574570 | NP_006838 | R | S | RS | possibly damaging |
| rs11574571 | NP_006838 | G | R | GR | possibly damaging |
| rs11574575 | NP_006838 | C | Y | CY | probably damaging |
| rs11574576 | NP_006838 | N | D | ND | benign            |
| rs11574589 | NP_006838 | K | T | KT | benign            |
| rs11574595 | NP_006838 | R | Q | RQ | benign            |
| rs11574606 | NP_006856 | S | P | SP | probably damaging |
| rs11574633 | NP_000878 | W | R | WR | benign            |
| rs11574657 | NP_001771 | S | L | SL | benign            |
| rs11574696 | NP_001217 | A | E | AE | benign            |
| rs11574697 | NP_001217 | E | K | EK | benign            |
| rs11574885 | NP_060087 | Q | R | QR | possibly damaging |
| rs11574936 | NP_000585 | I | N | IN | probably damaging |
| rs11574949 | NP_002200 | V | L | VL | benign            |
| rs11574972 | NP_004710 | R | Q | RQ | benign            |
| rs11574973 | NP_004710 | V | L | VL | benign            |
| rs11575046 | NP_006128 | R | P | RP | probably damaging |

|            |           |   |   |    |                   |
|------------|-----------|---|---|----|-------------------|
| rs11575111 | NP_620410 | A | P | AP | possibly damaging |
| rs11575194 | NP_000590 | R | W | RW | benign            |
| rs11575216 | NP_001629 | A | G | AG | benign            |
| rs11575245 | NP_005410 | Q | H | QH | benign            |
| rs11575292 | NP_000781 | E | D | ED | benign            |
| rs11575376 | NP_000781 | M | L | ML | benign            |
| rs11575377 | NP_000781 | M | I | MI | benign            |
| rs11575542 | NP_000781 | R | Q | RQ | benign            |
| rs11575580 | NP_004503 | R | W | RW | possibly damaging |
| rs11575584 | NP_006655 | L | F | LF | benign            |
| rs11575589 | NP_671518 | P | T | PT | benign            |
| rs11575594 | NP_006655 | I | V | IV | benign            |
| rs11575688 | NP_004123 | E | Q | EQ | benign            |
| rs11575750 | NP_004123 | V | I | VI | benign            |
| rs11575797 | NP_006166 | A | S | AS | benign            |
| rs11575797 | NP_932326 | A | S | AS | benign            |
| rs11575798 | NP_006166 | D | N | DN | benign            |
| rs11575798 | NP_932326 | D | N | DN | benign            |
| rs11575799 | NP_006166 | S | G | SG | benign            |
| rs11575799 | NP_932326 | S | G | SG | benign            |
| rs11575840 | NP_667341 | A | T | AT | benign            |
| rs11575845 | NP_612117 | F | L | FL | benign            |
| rs11575845 | NP_612116 | R | G | RG | benign            |
| rs11575845 | NP_079536 | R | G | RG | possibly damaging |
| rs11575848 | NP_079537 | R | Q | RQ | benign            |
| rs11575856 | NP_000905 | V | I | VI | benign            |
| rs11575871 | NP_055061 | L | V | LV | benign            |
| rs11575873 | NP_000286 | S | R | SR | benign            |
| rs11575874 | NP_076917 | P | S | PS | benign            |
| rs11575901 | NP_067544 | A | V | AV | benign            |
| rs11575901 | NP_000823 | A | V | AV | benign            |
| rs11575901 | NP_015566 | A | V | AV | benign            |
| rs11575906 | NP_002110 | R | C | RC | possibly damaging |
| rs11575907 | NP_002111 | V | I | VI | benign            |
| rs11575909 | NP_066964 | N | H | NH | possibly damaging |
| rs11575913 | NP_004575 | C | F | CF | probably damaging |
| rs11575924 | NP_000757 | R | C | RC | benign            |
| rs11575924 | NP_000753 | R | C | RC | possibly damaging |
| rs11575927 | NP_703144 | R | H | RH | benign            |
| rs11575933 | NP_620596 | P | S | PS | possibly damaging |
| rs11575933 | NP_620595 | P | S | PS | possibly damaging |
| rs11575933 | NP_620594 | P | S | PS | possibly damaging |
| rs11575936 | NP_000407 | V | M | VM | benign            |
| rs11575937 | NP_733822 | R | Q | RQ | benign            |
| rs11575937 | NP_005563 | R | Q | RQ | benign            |
| rs11575937 | NP_733821 | R | Q | RQ | benign            |

|            |           |   |   |    |                   |
|------------|-----------|---|---|----|-------------------|
| rs11575947 | NP_114400 | P | S | PS | benign            |
| rs11575947 | NP_061739 | P | S | PS | benign            |
| rs11575948 | NP_114400 | I | L | IL | benign            |
| rs11575948 | NP_061739 | I | L | IL | benign            |
| rs11575949 | NP_114442 | A | T | AT | benign            |
| rs11575949 | NP_061740 | A | T | AT | benign            |
| rs11575950 | NP_061740 | P | R | PR | possibly damaging |
| rs11575950 | NP_114442 | P | R | PR | probably damaging |
| rs11575951 | NP_114442 | D | H | DH | benign            |
| rs11575951 | NP_061740 | D | H | DH | possibly damaging |
| rs11575953 | NP_114475 | R | S | RS | benign            |
| rs11575953 | NP_061742 | R | S | RS | benign            |
| rs11575955 | NP_114475 | Q | K | QK | probably damaging |
| rs11575955 | NP_061742 | Q | K | QK | probably damaging |
| rs11575958 | NP_114478 | N | K | NK | benign            |
| rs11575958 | NP_054723 | N | K | NK | benign            |
| rs11575958 | NP_061744 | N | K | NK | benign            |
| rs11575958 | NP_114477 | N | K | NK | benign            |
| rs11575959 | NP_054723 | S | W | SW | probably damaging |
| rs11575959 | NP_114477 | S | W | SW | probably damaging |
| rs11575960 | NP_114478 | R | K | RK | benign            |
| rs11575960 | NP_061744 | R | K | RK | benign            |
| rs11575961 | NP_114382 | R | H | RH | benign            |
| rs11575961 | NP_061735 | R | H | RH | benign            |
| rs11575962 | NP_114479 | G | S | GS | benign            |
| rs11575962 | NP_061736 | G | S | GS | benign            |
| rs11575963 | NP_114479 | S | P | SP | benign            |
| rs11575963 | NP_061736 | S | P | SP | benign            |
| rs11575978 | NP_004735 | E | K | EK | benign            |
| rs11575982 | NP_000065 | R | P | RP | probably damaging |
| rs11575993 | NP_000627 | L | F | LF | possibly damaging |
| rs11576032 | NP_005347 | R | W | RW | probably damaging |
| rs11576186 | NP_733843 | S | T | ST | benign            |
| rs11576236 | NP_872429 | R | P | RP | benign            |
| rs11576236 | XP_496349 | R | P | RP | possibly damaging |
| rs11576415 | NP_004541 | P | A | PA | benign            |
| rs11576601 | NP_060555 | E | K | EK | benign            |
| rs11576750 | NP_055470 | S | I | SI | benign            |
| rs11576754 | NP_060887 | A | D | AD | possibly damaging |
| rs11576830 | NP_689579 | S | R | SR | benign            |
| rs11577171 | NP_004806 | S | Y | SY | benign            |
| rs11577203 | NP_005848 | L | V | LV | benign            |
| rs11577368 | NP_689481 | R | S | RS | benign            |
| rs11577457 | NP_002146 | V | I | VI | benign            |
| rs11577550 | XP_496429 | R | C | RC | benign            |
| rs11577561 | NP_006329 | G | R | GR | probably damaging |

|            |           |   |   |    |                   |
|------------|-----------|---|---|----|-------------------|
| rs11577561 | NP_963924 | G | R | GR | probably damaging |
| rs11577579 | NP_877498 | I | L | IL | benign            |
| rs11577579 | NP_653297 | I | L | IL | benign            |
| rs11577731 | NP_055270 | G | R | GR | probably damaging |
| rs11577922 | XP_496450 | A | P | AP | benign            |
| rs11578329 | XP_496343 | L | V | LV | benign            |
| rs11578329 | XP_496345 | L | V | LV | benign            |
| rs11578336 | NP_116247 | S | A | SA | benign            |
| rs11578466 | NP_068777 | A | G | AG | benign            |
| rs11578590 | NP_060555 | F | L | FL | possibly damaging |
| rs11579366 | NP_653299 | E | Q | EQ | benign            |
| rs11580170 | NP_079034 | R | Q | RQ | possibly damaging |
| rs11580250 | XP_371222 | R | H | RH | benign            |
| rs11580409 | XP_371259 | L | V | LV | benign            |
| rs11580625 | NP_006527 | V | I | VI | benign            |
| rs11580727 | XP_497714 | A | D | AD | benign            |
| rs11580913 | NP_689976 | L | V | LV | benign            |
| rs11580946 | NP_877495 | A | V | AV | benign            |
| rs11580946 | NP_068779 | A | V | AV | benign            |
| rs11581030 | XP_497745 | R | C | RC | benign            |
| rs11581214 | NP_689704 | S | C | SC | benign            |
| rs11581433 | XP_048104 | R | G | RG | possibly damaging |
| rs11581512 | XP_048104 | H | R | HR | possibly damaging |
| rs11581703 | NP_003935 | A | T | AT | benign            |
| rs11581921 | NP_071751 | M | I | MI | possibly damaging |
| rs11581969 | NP_006836 | A | P | AP | benign            |
| rs11582005 | NP_775803 | N | S | NS | benign            |
| rs11582343 | XP_496343 | S | N | SN | benign            |
| rs11582343 | XP_496345 | S | N | SN | benign            |
| rs11582639 | XP_036299 | L | I | LI | benign            |
| rs11582653 | XP_036299 | L | M | LM | benign            |
| rs11582663 | NP_112572 | R | Q | RQ | benign            |
| rs11582960 | NP_653224 | R | H | RH | benign            |
| rs11583410 | XP_060580 | I | S | IS | probably damaging |
| rs11583463 | XP_496357 | A | T | AT | benign            |
| rs11583529 | NP_079177 | V | E | VE | possibly damaging |
| rs11583680 | NP_777596 | A | V | AV | benign            |
| rs11583872 | XP_114087 | Y | S | YS | probably damaging |
| rs11583882 | NP_864764 | R | P | RP | possibly damaging |
| rs11583882 | NP_004412 | R | P | RP | probably damaging |
| rs11584104 | XP_496428 | P | T | PT | possibly damaging |
| rs11584340 | XP_048104 | P | S | PS | benign            |
| rs11585135 | NP_004144 | L | M | LM | benign            |
| rs11585341 | NP_005522 | K | E | KE | benign            |
| rs11585362 | XP_031401 | A | V | AV | benign            |
| rs11585481 | NP_071761 | P | L | PL | probably damaging |

|            |           |   |   |    |                   |
|------------|-----------|---|---|----|-------------------|
| rs11586041 | NP_060249 | G | D | GD | possibly damaging |
| rs11586116 | NP_061821 | N | I | NI | possibly damaging |
| rs11586344 | NP_000469 | N | S | NS | probably damaging |
| rs11586631 | XP_048104 | R | H | RH | probably damaging |
| rs11586699 | NP_061486 | T | M | TM | possibly damaging |
| rs11586699 | NP_005553 | T | M | TM | possibly damaging |
| rs11586769 | NP_000072 | K | T | KT | possibly damaging |
| rs11587112 | NP_060026 | S | I | SI | possibly damaging |
| rs11587640 | NP_996991 | L | M | LM | benign            |
| rs11587640 | NP_004310 | L | M | LM | benign            |
| rs11587944 | NP_000642 | R | C | RC | possibly damaging |
| rs11587944 | NP_000564 | R | C | RC | probably damaging |
| rs11588069 | NP_004093 | K | R | KR | benign            |
| rs11588132 | NP_036519 | M | T | MT | benign            |
| rs11588170 | XP_048104 | G | R | GR | possibly damaging |
| rs11588581 | NP_443128 | A | V | AV | benign            |
| rs11588712 | NP_068752 | P | S | PS | possibly damaging |
| rs11588753 | NP_004275 | R | P | RP | possibly damaging |
| rs11588791 | NP_991331 | T | S | TS | benign            |
| rs11588791 | NP_006343 | T | S | TS | benign            |
| rs11588857 | NP_006329 | P | S | PS | possibly damaging |
| rs11589593 | NP_775780 | A | G | AG | benign            |
| rs11589750 | NP_008965 | T | I | TI | possibly damaging |
| rs11590012 | XP_497666 | H | Q | HQ | benign            |
| rs11591147 | NP_777596 | R | L | RL | possibly damaging |
| rs11591817 | NP_002408 | R | Q | RQ | benign            |
| rs11591909 | NP_443723 | T | P | TP | benign            |
| rs11592166 | XP_048898 | R | G | RG | possibly damaging |
| rs11592273 | NP_000186 | G | W | GW | benign            |
| rs11592273 | NP_872577 | G | W | GW | possibly damaging |
| rs11592462 | NP_071407 | T | S | TS | benign            |
| rs11593253 | XP_374765 | T | I | TI | benign            |
| rs11593284 | NP_079151 | P | L | PL | possibly damaging |
| rs11593544 | NP_002304 | P | T | PT | possibly damaging |
| rs11593544 | NP_006711 | P | T | PT | probably damaging |
| rs11593766 | NP_203124 | D | E | DE | benign            |
| rs11593766 | NP_203126 | D | E | DE | benign            |
| rs11593766 | NP_203125 | D | E | DE | benign            |
| rs11594063 | NP_055860 | E | Q | EQ | benign            |
| rs11594277 | NP_006405 | L | P | LP | possibly damaging |
| rs11594277 | NP_892117 | L | P | LP | possibly damaging |
| rs11594305 | NP_689964 | N | T | NT | possibly damaging |
| rs11594445 | NP_038479 | R | Q | RQ | benign            |
| rs11594445 | NP_579899 | R | Q | RQ | possibly damaging |
| rs11595592 | NP_005176 | L | M | LM | benign            |
| rs11595614 | NP_005176 | L | M | LM | possibly damaging |



|            |           |   |   |    |                   |
|------------|-----------|---|---|----|-------------------|
| rs11595926 | NP_057712 | S | R | SR | benign            |
| rs11595926 | NP_567822 | S | R | SR | benign            |
| rs11596653 | NP_115967 | V | A | VA | benign            |
| rs11598079 | NP_002891 | V | G | VG | possibly damaging |
| rs11598233 | NP_005054 | L | M | LM | benign            |
| rs11598924 | NP_003052 | A | D | AD | benign            |
| rs11599051 | NP_115939 | E | K | EK | benign            |
| rs11599060 | NP_060546 | S | P | SP | benign            |
| rs11599284 | NP_003568 | G | R | GR | possibly damaging |
| rs11599755 | NP_510870 | P | Q | PQ | probably damaging |
| rs11599956 | XP_497306 | V | A | VA | benign            |
| rs11600045 | XP_084672 | L | M | LM | benign            |
| rs11600577 | NP_001155 | P | H | PH | probably damaging |
| rs11600577 | NP_663722 | P | H | PH | probably damaging |
| rs11600808 | NP_002171 | A | G | AG | benign            |
| rs11600896 | XP_166823 | G | S | GS | benign            |
| rs11601245 | NP_065174 | A | T | AT | benign            |
| rs11601425 | NP_110397 | R | Q | RQ | benign            |
| rs11601507 | NP_149023 | V | F | VF | possibly damaging |
| rs11601507 | NP_149083 | V | F | VF | possibly damaging |
| rs11601507 | NP_149084 | V | F | VF | possibly damaging |
| rs11601697 | XP_171490 | Y | C | YC | probably damaging |
| rs11602499 | XP_061624 | Q | E | QE | benign            |
| rs11602989 | NP_004945 | H | P | HP | probably damaging |
| rs11602989 | NP_059672 | H | P | HP | probably damaging |
| rs11603197 | XP_291981 | V | G | VG | benign            |
| rs11603504 | XP_062025 | F | L | FL | possibly damaging |
| rs11603869 | NP_775860 | E | Q | EQ | benign            |
| rs11603931 | NP_003096 | V | G | VG | possibly damaging |
| rs11604149 | NP_775860 | Q | R | QR | benign            |
| rs11604169 | NP_478100 | Y | C | YC | probably damaging |
| rs11604169 | NP_036233 | Y | C | YC | probably damaging |
| rs11604287 | NP_009114 | P | A | PA | probably damaging |
| rs11604362 | NP_653267 | I | T | IT | benign            |
| rs11604561 | NP_002636 | T | A | TA | benign            |
| rs11604671 | NP_848605 | G | R | GR | benign            |
| rs11604757 | XP_290540 | G | R | GR | probably damaging |
| rs11604921 | NP_003851 | D | A | DA | probably damaging |
| rs11604985 | NP_060327 | T | A | TA | benign            |
| rs11604985 | NP_060746 | T | A | TA | benign            |
| rs11605013 | NP_660201 | P | H | PH | benign            |
| rs11605196 | NP_775860 | P | Q | PQ | benign            |
| rs11605407 | NP_705839 | V | G | VG | possibly damaging |
| rs11605576 | XP_495880 | A | D | AD | benign            |
| rs11605632 | XP_495880 | E | K | EK | benign            |
| rs11606321 | NP_064613 | Q | P | QP | possibly damaging |

|            |           |   |   |    |                   |
|------------|-----------|---|---|----|-------------------|
| rs11606321 | NP_955469 | Q | P | QP | possibly damaging |
| rs11606321 | NP_955470 | Q | P | QP | possibly damaging |
| rs11606329 | NP_068810 | C | R | CR | probably damaging |
| rs11606506 | XP_497275 | C | Y | CY | possibly damaging |
| rs11606538 | XP_372391 | R | K | RK | benign            |
| rs11606831 | NP_002413 | H | P | HP | probably damaging |
| rs11606923 | NP_775852 | V | A | VA | benign            |
| rs11606930 | XP_497311 | S | F | SF | possibly damaging |
| rs11607055 | NP_006628 | L | I | LI | benign            |
| rs11607268 | NP_002326 | V | L | VL | benign            |
| rs11607340 | NP_057404 | S | F | SF | possibly damaging |
| rs11607491 | NP_000601 | T | M | TM | possibly damaging |
| rs11607916 | NP_006380 | N | T | NT | probably damaging |
| rs11608099 | NP_068810 | Q | H | QH | possibly damaging |
| rs11608392 | XP_495909 | P | L | PL | possibly damaging |
| rs11608438 | NP_005114 | P | H | PH | possibly damaging |
| rs11608915 | NP_775109 | R | Q | RQ | benign            |
| rs11609192 | XP_495917 | V | G | VG | possibly damaging |
| rs11609193 | NP_775864 | Q | H | QH | benign            |
| rs11609202 | XP_495913 | C | R | CR | probably damaging |
| rs11609348 | NP_003556 | A | T | AT | benign            |
| rs11609900 | NP_003035 | K | E | KE | possibly damaging |
| rs11610050 | NP_689535 | A | D | AD | possibly damaging |
| rs11611171 | NP_005585 | K | N | KN | benign            |
| rs11611346 | NP_057396 | R | H | RH | possibly damaging |
| rs11611666 | NP_776254 | V | G | VG | possibly damaging |
| rs11612427 | NP_062832 | R | G | RG | benign            |
| rs11612427 | NP_055264 | R | G | RG | possibly damaging |
| rs11612641 | NP_003569 | Q | H | QH | benign            |
| rs11612955 | XP_292035 | S | A | SA | benign            |
| rs11613495 | NP_066276 | V | A | VA | benign            |
| rs11613534 | NP_863658 | A | D | AD | possibly damaging |
| rs11613534 | NP_001151 | A | D | AD | possibly damaging |
| rs11613534 | NP_037361 | A | D | AD | possibly damaging |
| rs11613534 | NP_863651 | A | D | AD | possibly damaging |
| rs11614210 | NP_005430 | R | P | RP | probably damaging |
| rs11614458 | NP_005886 | Q | H | QH | benign            |
| rs11614935 | NP_055318 | H | P | HP | probably damaging |
| rs11614976 | NP_000422 | G | S | GS | benign            |
| rs11615135 | NP_055318 | H | P | HP | probably damaging |
| rs11615287 | XP_037557 | Q | H | QH | possibly damaging |
| rs11615567 | NP_002196 | Q | H | QH | possibly damaging |
| rs11615709 | NP_000915 | N | T | NT | possibly damaging |
| rs11615743 | NP_115523 | N | I | NI | benign            |
| rs11615957 | NP_115676 | Q | H | QH | benign            |
| rs11615999 | NP_775864 | Q | H | QH | benign            |

|            |           |   |   |    |                   |
|------------|-----------|---|---|----|-------------------|
| rs11616440 | NP_064506 | Q | R | QR | possibly damaging |
| rs11616741 | XP_375032 | L | I | LI | benign            |
| rs11616795 | XP_495964 | V | I | VI | benign            |
| rs11617079 | NP_037370 | G | R | GR | benign            |
| rs11617214 | NP_001837 | T | S | TS | benign            |
| rs11617392 | NP_055931 | A | S | AS | benign            |
| rs11618209 | NP_056111 | H | P | HP | probably damaging |
| rs11618395 | NP_055931 | G | R | GR | possibly damaging |
| rs11618506 | XP_495949 | L | P | LP | possibly damaging |
| rs11618609 | XP_296315 | S | C | SC | possibly damaging |
| rs11620705 | NP_009107 | V | G | VG | possibly damaging |
| rs11620852 | XP_370765 | A | V | AV | benign            |
| rs11621754 | XP_292227 | E | D | ED | benign            |
| rs11621884 | XP_372500 | P | A | PA | possibly damaging |
| rs11622442 | XP_372505 | V | G | VG | possibly damaging |
| rs11622776 | NP_055564 | A | V | AV | benign            |
| rs11622794 | XP_292227 | T | I | TI | benign            |
| rs11622821 | NP_001163 | A | D | AD | probably damaging |
| rs11622969 | XP_292227 | V | I | VI | benign            |
| rs11623267 | XP_370776 | E | Q | EQ | benign            |
| rs11624906 | NP_891977 | D | H | DH | benign            |
| rs11624906 | NP_892114 | D | H | DH | benign            |
| rs11624906 | NP_489479 | D | H | DH | benign            |
| rs11624906 | NP_150287 | D | H | DH | benign            |
| rs11624906 | NP_891978 | D | H | DH | possibly damaging |
| rs11625510 | XP_495967 | L | I | LI | benign            |
| rs11625687 | NP_055797 | L | I | LI | benign            |
| rs11625690 | NP_055797 | L | I | LI | benign            |
| rs11625921 | NP_777638 | I | V | IV | benign            |
| rs11626824 | XP_370765 | S | T | ST | benign            |
| rs11627944 | NP_689539 | A | G | AG | benign            |
| rs11627980 | NP_689539 | L | M | LM | benign            |
| rs11628252 | NP_003073 | H | P | HP | possibly damaging |
| rs11628782 | NP_055054 | V | G | VG | probably damaging |
| rs11628901 | NP_057501 | A | T | AT | benign            |
| rs11628996 | NP_065099 | R | K | RK | benign            |
| rs11629598 | NP_060154 | I | V | IV | benign            |
| rs11629838 | NP_060154 | S | Y | SY | benign            |
| rs11630197 | XP_208809 | W | R | WR | probably damaging |
| rs11630236 | NP_055087 | T | A | TA | benign            |
| rs11630617 | NP_064595 | P | H | PH | possibly damaging |
| rs11630617 | NP_945119 | P | H | PH | possibly damaging |
| rs11630901 | NP_056355 | R | G | RG | possibly damaging |
| rs11631813 | XP_208809 | S | G | SG | benign            |
| rs11633581 | XP_370910 | I | V | IV | benign            |
| rs11633796 | NP_055874 | T | I | TI | possibly damaging |

|            |           |   |   |    |                   |
|------------|-----------|---|---|----|-------------------|
| rs11634462 | NP_065902 | L | I | LI | benign            |
| rs11634652 | XP_044580 | V | F | VF | benign            |
| rs11634784 | NP_055874 | V | A | VA | benign            |
| rs11635172 | NP_055259 | L | V | LV | benign            |
| rs11637562 | NP_008832 | A | V | AV | benign            |
| rs11638283 | NP_149017 | E | K | EK | benign            |
| rs11638297 | XP_370893 | T | P | TP | possibly damaging |
| rs11638390 | NP_005145 | T | A | TA | benign            |
| rs11638719 | NP_742094 | L | V | LV | benign            |
| rs11638719 | NP_742093 | L | V | LV | benign            |
| rs11638719 | NP_473361 | L | V | LV | benign            |
| rs11638723 | NP_689661 | P | R | PR | benign            |
| rs11639943 | NP_079384 | A | V | AV | benign            |
| rs11640138 | NP_005416 | R | W | RW | probably damaging |
| rs11640413 | NP_003952 | G | S | GS | benign            |
| rs11640454 | XP_375305 | R | Q | RQ | benign            |
| rs11640912 | NP_620685 | L | I | LI | benign            |
| rs11640912 | NP_955387 | L | I | LI | benign            |
| rs11641195 | NP_078783 | A | D | AD | benign            |
| rs11641195 | NP_663322 | A | D | AD | benign            |
| rs11641195 | NP_663323 | A | D | AD | benign            |
| rs11641195 | NP_757384 | A | D | AD | benign            |
| rs11642118 | NP_003924 | R | H | RH | benign            |
| rs11642210 | NP_005178 | R | C | RC | probably damaging |
| rs11642210 | NP_787127 | R | C | RC | probably damaging |
| rs11642472 | NP_005852 | R | C | RC | probably damaging |
| rs11642546 | NP_694971 | P | L | PL | possibly damaging |
| rs11642648 | XP_496122 | S | F | SF | possibly damaging |
| rs11642955 | NP_689672 | H | Y | HY | benign            |
| rs11643018 | NP_207837 | R | K | RK | benign            |
| rs11643211 | NP_620685 | Y | H | YH | benign            |
| rs11643211 | NP_955387 | Y | H | YH | benign            |
| rs11643314 | NP_003600 | G | W | GW | probably damaging |
| rs11643507 | NP_079463 | N | T | NT | benign            |
| rs11643718 | NP_000330 | R | Q | RQ | benign            |
| rs11643870 | NP_067020 | V | M | VM | benign            |
| rs11644164 | NP_848547 | L | P | LP | benign            |
| rs11644502 | XP_044632 | R | Q | RQ | benign            |
| rs11644733 | NP_060850 | D | H | DH | benign            |
| rs11644820 | NP_705690 | R | K | RK | benign            |
| rs11644942 | NP_705900 | S | T | ST | benign            |
| rs11644996 | NP_060900 | T | P | TP | benign            |
| rs11645068 | NP_060810 | H | P | HP | probably damaging |
| rs11645497 | NP_005021 | F | L | FL | probably damaging |
| rs11645625 | NP_055526 | F | I | FI | benign            |
| rs11645775 | NP_060409 | H | P | HP | probably damaging |

|            |           |   |   |    |                   |
|------------|-----------|---|---|----|-------------------|
| rs11645775 | NP_891552 | H | P | HP | probably damaging |
| rs11646374 | NP_000126 | A | V | AV | benign            |
| rs11646443 | NP_758857 | R | W | RW | benign            |
| rs11646443 | NP_597997 | R | W | RW | possibly damaging |
| rs11648112 | NP_570607 | E | D | ED | benign            |
| rs11648112 | NP_061030 | E | D | ED | benign            |
| rs11648131 | NP_777584 | D | N | DN | benign            |
| rs11648231 | XP_498469 | L | F | LF | benign            |
| rs11648553 | NP_859069 | D | N | DN | benign            |
| rs11648553 | NP_944497 | D | N | DN | benign            |
| rs11648609 | NP_055529 | R | Q | RQ | benign            |
| rs11648704 | NP_115564 | S | T | ST | benign            |
| rs11648720 | NP_115564 | S | I | SI | possibly damaging |
| rs11648783 | NP_036500 | H | R | HR | possibly damaging |
| rs11648852 | NP_055959 | I | V | IV | benign            |
| rs11649000 | NP_115645 | L | M | LM | benign            |
| rs11649499 | NP_963869 | P | R | PR | probably damaging |
| rs11649511 | NP_071895 | L | M | LM | benign            |
| rs11649668 | XP_497522 | D | N | DN | benign            |
| rs11649804 | NP_109590 | P | T | PT | possibly damaging |
| rs11649834 | XP_496218 | T | M | TM | probably damaging |
| rs11650083 | NP_444279 | P | Q | PQ | benign            |
| rs11650151 | NP_653278 | V | G | VG | possibly damaging |
| rs11650151 | NP_945193 | V | G | VG | possibly damaging |
| rs11650318 | NP_848666 | V | A | VA | benign            |
| rs11650575 | NP_036270 | N | T | NT | possibly damaging |
| rs11651118 | NP_976226 | S | R | SR | benign            |
| rs11651240 | XP_371039 | P | L | PL | probably damaging |
| rs11651270 | NP_127499 | M | V | MV | benign            |
| rs11651270 | NP_127500 | M | V | MV | benign            |
| rs11651270 | NP_055737 | M | V | MV | benign            |
| rs11651270 | NP_127497 | M | V | MV | benign            |
| rs11651295 | NP_060003 | K | E | KE | possibly damaging |
| rs11651595 | NP_127499 | T | S | TS | benign            |
| rs11651595 | NP_127500 | T | S | TS | benign            |
| rs11651595 | NP_055737 | T | S | TS | benign            |
| rs11651595 | NP_127497 | T | S | TS | benign            |
| rs11651675 | NP_689681 | V | I | VI | benign            |
| rs11651968 | NP_689556 | V | M | VM | benign            |
| rs11652075 | NP_077015 | W | R | WR | benign            |
| rs11652447 | NP_004749 | S | N | SN | benign            |
| rs11652709 | NP_000493 | Q | H | QH | probably damaging |
| rs11653658 | NP_064547 | H | D | HD | probably damaging |
| rs11653832 | NP_127499 | V | L | VL | benign            |
| rs11653832 | NP_127500 | V | L | VL | benign            |
| rs11653832 | NP_055737 | V | L | VL | benign            |

|            |           |   |   |    |                   |
|------------|-----------|---|---|----|-------------------|
| rs11653832 | NP_127497 | V | L | VL | benign            |
| rs11653889 | NP_114171 | V | E | VE | benign            |
| rs11654604 | NP_644814 | A | V | AV | benign            |
| rs11654824 | NP_775259 | I | N | IN | probably damaging |
| rs11654827 | NP_005164 | Q | H | QH | probably damaging |
| rs11654827 | NP_777613 | Q | H | QH | probably damaging |
| rs11654827 | NP_777614 | Q | H | QH | probably damaging |
| rs11654827 | NP_777616 | Q | H | QH | probably damaging |
| rs11654827 | NP_777617 | Q | H | QH | probably damaging |
| rs11654827 | NP_777618 | Q | H | QH | probably damaging |
| rs11654827 | NP_777615 | Q | H | QH | probably damaging |
| rs11655342 | NP_872344 | A | S | AS | benign            |
| rs11655578 | NP_115818 | P | H | PH | probably damaging |
| rs11655622 | NP_003725 | R | G | RG | probably damaging |
| rs11655689 | NP_694962 | V | E | VE | benign            |
| rs11655844 | NP_001298 | A | D | AD | possibly damaging |
| rs11655970 | NP_064563 | E | G | EG | possibly damaging |
| rs11656500 | XP_085578 | R | H | RH | possibly damaging |
| rs11656629 | NP_112584 | A | V | AV | benign            |
| rs11656660 | NP_003725 | V | D | VD | probably damaging |
| rs11656685 | NP_003777 | A | D | AD | benign            |
| rs11656816 | NP_001058 | S | I | SI | probably damaging |
| rs11657051 | NP_055775 | R | W | RW | benign            |
| rs11657054 | NP_699169 | A | V | AV | benign            |
| rs11657270 | NP_079133 | Y | H | YH | benign            |
| rs11657280 | NP_525021 | S | T | ST | benign            |
| rs11657323 | NP_003762 | N | T | NT | possibly damaging |
| rs11657394 | NP_689561 | P | H | PH | benign            |
| rs11657489 | NP_065804 | G | S | GS | benign            |
| rs11657747 | NP_127499 | T | M | TM | benign            |
| rs11657747 | NP_127500 | T | M | TM | benign            |
| rs11657747 | NP_055737 | T | M | TM | benign            |
| rs11657804 | NP_525021 | V | I | VI | benign            |
| rs11657833 | NP_000204 | D | V | DV | possibly damaging |
| rs11658069 | NP_002607 | A | D | AD | benign            |
| rs11658164 | NP_060004 | S | A | SA | benign            |
| rs11658785 | NP_009230 | R | M | RM | benign            |
| rs11658785 | NP_009231 | R | M | RM | benign            |
| rs11658785 | NP_009232 | R | M | RM | benign            |
| rs11658785 | NP_009236 | R | M | RM | benign            |
| rs11658785 | NP_009235 | R | M | RM | benign            |
| rs11658785 | NP_009233 | R | M | RM | possibly damaging |
| rs11658785 | NP_009227 | R | M | RM | possibly damaging |
| rs11658876 | NP_002625 | A | S | AS | benign            |
| rs11659145 | XP_085578 | R | C | RC | possibly damaging |
| rs11659589 | NP_597716 | V | G | VG | possibly damaging |

|            |           |   |   |    |                   |
|------------|-----------|---|---|----|-------------------|
| rs11660217 | NP_003190 | M | I | MI | possibly damaging |
| rs11660370 | NP_612384 | C | S | CS | possibly damaging |
| rs11662595 | NP_067637 | H | R | HR | possibly damaging |
| rs11664063 | NP_005550 | A | T | AT | benign            |
| rs11664907 | NP_536722 | N | S | NS | benign            |
| rs11665084 | NP_067637 | A | V | AV | benign            |
| rs11665168 | XP_497580 | Y | C | YC | benign            |
| rs11665978 | NP_003420 | G | R | GR | benign            |
| rs11666024 | NP_005865 | H | R | HR | benign            |
| rs11666105 | NP_055290 | V | A | VA | benign            |
| rs11666150 | NP_000225 | Q | H | QH | possibly damaging |
| rs11666245 | NP_689573 | R | W | RW | possibly damaging |
| rs11666267 | NP_775815 | G | S | GS | benign            |
| rs11666293 | NP_694989 | S | I | SI | benign            |
| rs11666305 | NP_009112 | Q | H | QH | benign            |
| rs11666699 | NP_689492 | Q | P | QP | possibly damaging |
| rs11666735 | NP_579803 | D | N | DN | benign            |
| rs11666735 | NP_579805 | D | N | DN | benign            |
| rs11666735 | NP_579813 | D | N | DN | benign            |
| rs11666735 | NP_579814 | D | N | DN | benign            |
| rs11666735 | NP_001991 | D | N | DN | benign            |
| rs11666735 | NP_579807 | D | N | DN | benign            |
| rs11666735 | NP_579808 | D | N | DN | benign            |
| rs11666735 | NP_579812 | D | N | DN | benign            |
| rs11666735 | NP_579806 | D | N | DN | benign            |
| rs11666876 | NP_258429 | K | Q | KQ | benign            |
| rs11667007 | NP_201574 | G | S | GS | benign            |
| rs11667052 | NP_065864 | M | I | MI | benign            |
| rs11667206 | NP_055830 | N | T | NT | benign            |
| rs11667275 | NP_073574 | T | S | TS | benign            |
| rs11667569 | NP_085125 | A | T | AT | benign            |
| rs11667987 | XP_058964 | M | L | ML | benign            |
| rs11668239 | NP_073589 | Q | H | QH | possibly damaging |
| rs11668325 | NP_000225 | S | N | SN | benign            |
| rs11668417 | XP_496281 | R | W | RW | possibly damaging |
| rs11668502 | XP_211460 | L | F | LF | benign            |
| rs11668511 | NP_542393 | L | F | LF | benign            |
| rs11668530 | NP_201586 | H | Y | HY | probably damaging |
| rs11668530 | NP_443729 | H | Y | HY | probably damaging |
| rs11668547 | NP_775750 | S | I | SI | benign            |
| rs11668974 | NP_006621 | V | M | VM | benign            |
| rs11669183 | NP_653287 | S | A | SA | benign            |
| rs11669257 | XP_292832 | L | F | LF | benign            |
| rs11669397 | NP_003250 | R | W | RW | possibly damaging |
| rs11669576 | NP_000518 | A | T | AT | benign            |
| rs11669628 | NP_060191 | A | T | AT | benign            |

|            |           |   |   |    |                   |
|------------|-----------|---|---|----|-------------------|
| rs11669849 | NP_036287 | L | V | LV | benign            |
| rs11669918 | XP_372730 | A | S | AS | benign            |
| rs11670007 | NP_039226 | R | H | RH | benign            |
| rs11670129 | XP_028253 | L | M | LM | benign            |
| rs11670246 | NP_003420 | F | S | FS | benign            |
| rs11670676 | NP_742150 | M | V | MV | benign            |
| rs11670727 | NP_004842 | A | T | AT | benign            |
| rs11670799 | NP_000426 | P | L | PL | probably damaging |
| rs11670862 | NP_003410 | S | T | ST | benign            |
| rs11670988 | NP_653286 | R | Q | RQ | benign            |
| rs11671067 | NP_064555 | E | D | ED | benign            |
| rs11671490 | NP_999841 | S | I | SI | possibly damaging |
| rs11671490 | NP_999840 | S | I | SI | probably damaging |
| rs11671530 | NP_009185 | E | K | EK | benign            |
| rs11671752 | NP_002507 | T | P | TP | possibly damaging |
| rs11671789 | NP_056952 | H | R | HR | benign            |
| rs11671789 | NP_055326 | H | R | HR | benign            |
| rs11672238 | XP_047550 | T | K | TK | benign            |
| rs11672248 | NP_004741 | R | K | RK | benign            |
| rs11673029 | NP_079303 | S | G | SG | benign            |
| rs11673144 | NP_055033 | P | L | PL | benign            |
| rs11673178 | NP_006855 | M | I | MI | benign            |
| rs11673395 | NP_037512 | P | S | PS | possibly damaging |
| rs11673423 | XP_371145 | G | R | GR | probably damaging |
| rs11673538 | XP_292832 | F | S | FS | benign            |
| rs11673683 | NP_938075 | L | F | LF | benign            |
| rs11673683 | NP_938074 | L | F | LF | benign            |
| rs11673683 | NP_001527 | L | F | LF | benign            |
| rs11674973 | NP_004516 | R | M | RM | possibly damaging |
| rs11675632 | NP_008818 | G | S | GS | benign            |
| rs11676272 | NP_004027 | P | S | PS | possibly damaging |
| rs11677099 | NP_997404 | D | V | DV | probably damaging |
| rs11677451 | NP_060903 | V | E | VE | possibly damaging |
| rs11677577 | NP_004535 | V | G | VG | probably damaging |
| rs11677877 | NP_112734 | H | R | HR | possibly damaging |
| rs11680012 | NP_004726 | R | T | RT | benign            |
| rs11680495 | NP_733772 | V | A | VA | benign            |
| rs11680854 | NP_072174 | I | M | IM | benign            |
| rs11681366 | NP_061854 | Y | C | YC | probably damaging |
| rs11681642 | NP_001683 | M | T | MT | benign            |
| rs11681826 | XP_371486 | M | V | MV | benign            |
| rs11682593 | NP_055184 | H | D | HD | probably damaging |
| rs11683690 | XP_297687 | H | Y | HY | benign            |
| rs11684353 | NP_085054 | G | A | GA | benign            |
| rs11685665 | NP_742066 | R | G | RG | possibly damaging |
| rs11686014 | XP_114222 | M | I | MI | benign            |



|            |           |   |   |    |                   |
|------------|-----------|---|---|----|-------------------|
| rs11686205 | NP_002290 | P | L | PL | probably damaging |
| rs11686212 | NP_057114 | S | G | SG | benign            |
| rs11686946 | XP_291001 | Q | R | QR | possibly damaging |
| rs11686957 | NP_071898 | R | C | RC | benign            |
| rs11687611 | NP_997639 | S | R | SR | benign            |
| rs11687611 | NP_997640 | S | R | SR | benign            |
| rs11687611 | NP_997641 | S | R | SR | benign            |
| rs11687611 | NP_997643 | S | R | SR | benign            |
| rs11687611 | NP_997647 | S | R | SR | benign            |
| rs11687611 | NP_002017 | S | R | SR | possibly damaging |
| rs11689281 | NP_061144 | L | R | LR | benign            |
| rs11689281 | NP_878267 | L | R | LR | benign            |
| rs11689899 | NP_079245 | R | M | RM | benign            |
| rs11691572 | NP_004291 | K | N | KN | benign            |
| rs11691572 | NP_009030 | K | N | KN | benign            |
| rs11691799 | XP_497859 | W | R | WR | probably damaging |
| rs11692021 | NP_061950 | W | R | WR | benign            |
| rs11692435 | NP_005726 | A | V | AV | benign            |
| rs11693182 | NP_008977 | E | D | ED | benign            |
| rs11694988 | NP_689730 | H | R | HR | benign            |
| rs11695248 | NP_061144 | A | V | AV | benign            |
| rs11695248 | NP_878267 | A | V | AV | benign            |
| rs11695455 | NP_003844 | D | G | DG | possibly damaging |
| rs11695788 | NP_954674 | D | H | DH | probably damaging |
| rs11695925 | NP_055483 | Y | C | YC | probably damaging |
| rs11696231 | NP_006593 | P | L | PL | probably damaging |
| rs11696252 | NP_006593 | P | H | PH | probably damaging |
| rs11696307 | NP_872325 | T | I | TI | benign            |
| rs11696673 | NP_116781 | P | L | PL | probably damaging |
| rs11696694 | NP_004526 | N | I | NI | probably damaging |
| rs11696866 | XP_066058 | V | G | VG | possibly damaging |
| rs11697054 | NP_001307 | Q | H | QH | possibly damaging |
| rs11697581 | XP_046437 | G | S | GS | possibly damaging |
| rs11698783 | NP_002522 | A | V | AV | benign            |
| rs11699009 | NP_872325 | F | L | FL | benign            |
| rs11699426 | NP_000952 | V | G | VG | possibly damaging |
| rs11699758 | NP_005551 | V | I | VI | benign            |
| rs11699859 | XP_028810 | T | I | TI | possibly damaging |
| rs11699901 | NP_848586 | F | C | FC | probably damaging |
| rs11700112 | NP_817127 | R | P | RP | possibly damaging |
| rs11700220 | NP_056481 | H | R | HR | probably damaging |
| rs11700812 | NP_000062 | R | H | RH | possibly damaging |
| rs11701137 | XP_497774 | I | V | IV | benign            |
| rs11701322 | NP_061817 | S | C | SC | benign            |
| rs11701643 | NP_001227 | D | V | DV | benign            |
| rs11702567 | XP_497774 | L | V | LV | benign            |

|            |           |   |   |    |                   |
|------------|-----------|---|---|----|-------------------|
| rs11702993 | NP_037510 | Q | H | QH | benign            |
| rs11703011 | NP_705837 | G | D | GD | possibly damaging |
| rs11703160 | NP_057419 | T | P | TP | benign            |
| rs11703226 | NP_065194 | A | T | AT | benign            |
| rs11703442 | XP_496486 | R | G | RG | benign            |
| rs11703526 | NP_008863 | V | L | VL | benign            |
| rs11703526 | NP_599031 | V | L | VL | benign            |
| rs11703526 | NP_599032 | V | L | VL | benign            |
| rs11703652 | XP_496526 | L | I | LI | benign            |
| rs11703684 | XP_496521 | V | I | VI | benign            |
| rs11704463 | XP_377716 | D | A | DA | possibly damaging |
| rs11704506 | NP_055061 | A | T | AT | benign            |
| rs11704519 | XP_377716 | R | K | RK | benign            |
| rs11704758 | NP_002296 | E | Q | EQ | benign            |
| rs11704759 | XP_037759 | V | A | VA | benign            |
| rs11704880 | XP_496518 | V | M | VM | benign            |
| rs11704935 | NP_055955 | V | M | VM | benign            |
| rs11705106 | NP_006730 | S | A | SA | benign            |
| rs11705259 | NP_689825 | A | T | AT | benign            |
| rs11705271 | NP_056182 | S | N | SN | benign            |
| rs11705288 | XP_066243 | G | S | GS | benign            |
| rs11705551 | NP_006595 | L | M | LM | benign            |
| rs11706273 | NP_060828 | P | L | PL | possibly damaging |
| rs11707167 | XP_293633 | Q | R | QR | benign            |
| rs11707331 | NP_006505 | P | L | PL | benign            |
| rs11707648 | XP_497912 | I | V | IV | benign            |
| rs11708029 | NP_705899 | L | V | LV | benign            |
| rs11708178 | NP_055665 | P | H | PH | probably damaging |
| rs11708369 | XP_497937 | L | S | LS | benign            |
| rs11708427 | NP_005679 | Q | H | QH | possibly damaging |
| rs11708527 | NP_115968 | P | L | PL | probably damaging |
| rs11710339 | NP_064627 | T | S | TS | benign            |
| rs11710967 | NP_001342 | T | A | TA | benign            |
| rs11711050 | NP_061092 | G | S | GS | benign            |
| rs11711157 | XP_209550 | V | M | VM | benign            |
| rs11711349 | XP_067448 | E | Q | EQ | benign            |
| rs11711871 | NP_919269 | H | P | HP | benign            |
| rs11711953 | NP_002366 | R | Q | RQ | benign            |
| rs11711953 | NP_112147 | R | Q | RQ | benign            |
| rs11712232 | XP_209550 | S | N | SN | benign            |
| rs11712950 | XP_047357 | E | G | EG | benign            |
| rs11714841 | NP_061127 | D | N | DN | benign            |
| rs11715493 | NP_776160 | H | R | HR | benign            |
| rs11715981 | NP_473451 | P | L | PL | probably damaging |
| rs11716852 | NP_057643 | E | K | EK | benign            |
| rs11716994 | XP_291054 | S | L | SL | possibly damaging |

|            |           |   |   |    |                   |
|------------|-----------|---|---|----|-------------------|
| rs11717039 | XP_171032 | C | R | CR | probably damaging |
| rs11717113 | NP_002962 | A | G | AG | benign            |
| rs11717165 | NP_852137 | G | R | GR | possibly damaging |
| rs11717165 | NP_612419 | G | R | GR | possibly damaging |
| rs11717585 | XP_371655 | D | E | DE | benign            |
| rs11717889 | XP_371681 | D | Y | DY | probably damaging |
| rs11718329 | NP_057173 | R | T | RT | benign            |
| rs11718848 | NP_002069 | Q | K | QK | benign            |
| rs11719086 | XP_291055 | R | K | RK | benign            |
| rs11719133 | XP_371622 | V | G | VG | benign            |
| rs11719981 | NP_703190 | A | V | AV | benign            |
| rs11719981 | NP_703191 | A | V | AV | benign            |
| rs11719981 | NP_116121 | A | V | AV | benign            |
| rs11720059 | XP_497937 | R | Q | RQ | possibly damaging |
| rs11720139 | XP_291064 | R | G | RG | possibly damaging |
| rs11720526 | XP_371614 | R | I | RI | probably damaging |
| rs11720886 | NP_006605 | A | T | AT | benign            |
| rs11720962 | NP_079439 | P | R | PR | probably damaging |
| rs11721074 | NP_036403 | A | D | AD | benign            |
| rs11721074 | NP_054878 | A | D | AD | benign            |
| rs11721104 | NP_009115 | Q | H | QH | benign            |
| rs11721218 | NP_002213 | E | Q | EQ | benign            |
| rs11721265 | NP_653234 | L | M | LM | benign            |
| rs11721639 | NP_005926 | V | G | VG | possibly damaging |
| rs11722461 | NP_005246 | I | V | IV | benign            |
| rs11722476 | NP_064544 | S | N | SN | benign            |
| rs11723368 | NP_055637 | F | I | FI | probably damaging |
| rs11723410 | NP_064544 | S | F | SF | benign            |
| rs11724347 | NP_003319 | R | Q | RQ | possibly damaging |
| rs11725880 | NP_861524 | P | S | PS | possibly damaging |
| rs11726117 | NP_079420 | T | M | TM | benign            |
| rs11726970 | NP_006783 | N | D | ND | benign            |
| rs11728107 | XP_496692 | V | M | VM | benign            |
| rs11729797 | NP_079420 | K | R | KR | benign            |
| rs11731231 | NP_065824 | E | Q | EQ | benign            |
| rs11732377 | NP_689991 | V | G | VG | possibly damaging |
| rs11733183 | NP_938022 | P | S | PS | possibly damaging |
| rs11734353 | NP_938022 | L | V | LV | benign            |
| rs11734372 | XP_044461 | M | T | MT | benign            |
| rs11734376 | NP_079225 | V | F | VF | benign            |
| rs11735477 | NP_115512 | Q | H | QH | benign            |
| rs11736799 | NP_819056 | V | M | VM | benign            |
| rs11736872 | NP_733828 | A | T | AT | benign            |
| rs11738640 | NP_005564 | K | N | KN | possibly damaging |
| rs11739136 | NP_004128 | E | K | EK | benign            |
| rs11739508 | NP_003655 | E | D | ED | benign            |

|            |           |   |   |    |                   |
|------------|-----------|---|---|----|-------------------|
| rs11739693 | NP_001438 | G | A | GA | benign            |
| rs11740179 | NP_000405 | I | V | IV | benign            |
| rs11740603 | XP_371778 | R | L | RL | benign            |
| rs11741593 | NP_001360 | A | D | AD | benign            |
| rs11742049 | NP_938023 | R | H | RH | benign            |
| rs11742646 | NP_776189 | E | Q | EQ | benign            |
| rs11743570 | XP_209700 | D | H | DH | possibly damaging |
| rs11743574 | XP_209700 | E | K | EK | benign            |
| rs11744680 | NP_114062 | R | S | RS | benign            |
| rs11744680 | NP_061734 | R | S | RS | benign            |
| rs11745088 | NP_037541 | E | Q | EQ | benign            |
| rs11745117 | XP_499223 | V | A | VA | benign            |
| rs11745337 | NP_056392 | L | F | LF | benign            |
| rs11745410 | XP_376444 | L | V | LV | benign            |
| rs11745542 | XP_498015 | I | T | IT | probably damaging |
| rs11745614 | NP_004376 | S | C | SC | possibly damaging |
| rs11745656 | NP_006697 | S | Y | SY | possibly damaging |
| rs11746232 | NP_005566 | I | V | IV | benign            |
| rs11746993 | XP_371758 | S | P | SP | probably damaging |
| rs11747021 | XP_371758 | V | A | VA | possibly damaging |
| rs11747519 | NP_490645 | R | Q | RQ | benign            |
| rs11747519 | NP_114139 | R | Q | RQ | benign            |
| rs11747630 | NP_003624 | T | N | TN | benign            |
| rs11748164 | XP_114432 | E | A | EA | benign            |
| rs11748836 | NP_061161 | E | K | EK | benign            |
| rs11749126 | NP_598377 | Y | F | YF | benign            |
| rs11750176 | NP_061759 | D | A | DA | probably damaging |
| rs11750538 | NP_036466 | R | W | RW | benign            |
| rs11750810 | NP_061763 | L | F | LF | benign            |
| rs11750814 | NP_006687 | T | M | TM | benign            |
| rs11750814 | NP_899203 | T | M | TM | benign            |
| rs11750814 | NP_631938 | T | M | TM | benign            |
| rs11750821 | NP_055059 | R | H | RH | benign            |
| rs11751058 | NP_055438 | A | D | AD | benign            |
| rs11751765 | NP_277037 | D | N | DN | benign            |
| rs11751765 | NP_060885 | D | N | DN | benign            |
| rs11751765 | NP_277036 | D | N | DN | benign            |
| rs11752313 | XP_498152 | G | D | GD | possibly damaging |
| rs11752608 | NP_039224 | V | G | VG | benign            |
| rs11753059 | XP_376479 | P | H | PH | probably damaging |
| rs11753382 | NP_739575 | G | C | GC | possibly damaging |
| rs11753382 | NP_079512 | G | C | GC | possibly damaging |
| rs11753622 | NP_997465 | V | G | VG | possibly damaging |
| rs11753862 | XP_048070 | L | S | LS | possibly damaging |
| rs11754061 | NP_001701 | S | A | SA | benign            |
| rs11754169 | XP_371797 | G | R | GR | benign            |

|            |           |   |   |    |                   |
|------------|-----------|---|---|----|-------------------|
| rs11754288 | NP_005486 | A | T | AT | benign            |
| rs11755182 | XP_498078 | R | S | RS | possibly damaging |
| rs11755393 | NP_060224 | Q | R | QR | benign            |
| rs11755848 | NP_055267 | L | I | LI | benign            |
| rs11756238 | XP_371809 | G | S | GS | benign            |
| rs11756977 | NP_899236 | R | H | RH | benign            |
| rs11756977 | NP_056363 | R | H | RH | possibly damaging |
| rs11757455 | NP_002281 | R | W | RW | probably damaging |
| rs11758242 | NP_067044 | S | Y | SY | possibly damaging |
| rs11758339 | NP_899236 | A | T | AT | benign            |
| rs11758339 | NP_056363 | A | T | AT | benign            |
| rs11758592 | XP_166300 | A | S | AS | benign            |
| rs11758960 | NP_001081 | V | E | VE | possibly damaging |
| rs11759232 | NP_061978 | R | M | RM | possibly damaging |
| rs11759570 | NP_005882 | K | R | KR | benign            |
| rs11760885 | XP_166571 | L | V | LV | benign            |
| rs11760975 | XP_291208 | S | T | ST | benign            |
| rs11761306 | NP_839956 | N | D | ND | benign            |
| rs11761888 | NP_525124 | S | L | SL | benign            |
| rs11761941 | NP_612454 | G | E | GE | benign            |
| rs11762014 | NP_056210 | P | L | PL | possibly damaging |
| rs11762417 | NP_055211 | C | R | CR | probably damaging |
| rs11762417 | NP_542198 | C | R | CR | probably damaging |
| rs11764583 | XP_496860 | T | I | TI | benign            |
| rs11765019 | NP_775836 | Y | C | YC | probably damaging |
| rs11765552 | NP_055731 | L | M | LM | benign            |
| rs11765961 | NP_525124 | S | G | SG | benign            |
| rs11766187 | NP_569709 | P | L | PL | probably damaging |
| rs11766501 | NP_003487 | S | C | SC | possibly damaging |
| rs11766509 | NP_003487 | S | R | SR | benign            |
| rs11766611 | XP_166527 | V | M | VM | benign            |
| rs11766782 | NP_857597 | T | N | TN | benign            |
| rs11768296 | NP_663160 | M | V | MV | benign            |
| rs11768296 | NP_663161 | M | V | MV | benign            |
| rs11768296 | NP_663162 | M | V | MV | benign            |
| rs11768296 | NP_663163 | M | V | MV | benign            |
| rs11768296 | NP_663164 | M | V | MV | benign            |
| rs11768296 | NP_056365 | M | V | MV | benign            |
| rs11768465 | NP_277041 | T | M | TM | benign            |
| rs11768472 | XP_376609 | D | H | DH | possibly damaging |
| rs11768549 | NP_005223 | R | Q | RQ | benign            |
| rs11769006 | NP_954655 | D | A | DA | probably damaging |
| rs11769006 | NP_001715 | D | A | DA | probably damaging |
| rs11769911 | NP_061188 | R | Q | RQ | benign            |
| rs11770052 | NP_872310 | N | I | NI | possibly damaging |
| rs11770084 | NP_689957 | E | D | ED | benign            |

|            |              |   |   |    |                   |
|------------|--------------|---|---|----|-------------------|
| rs11770627 | XP_376587    | P | A | PA | probably damaging |
| rs11770649 | NP_001120    | D | E | DE | benign            |
| rs11771379 | NP_861440    | D | V | DV | possibly damaging |
| rs11771635 | NP_067053    | S | N | SN | benign            |
| rs11771635 | NP_733751    | S | N | SN | benign            |
| rs11771799 | NP_839956    | I | T | IT | benign            |
| rs11772411 | XP_166527    | L | Q | LQ | possibly damaging |
| rs11773032 | NP_000730    | G | S | GS | benign            |
| rs11773132 | NP_945194    | A | T | AT | benign            |
| rs11773363 | XP_088140    | P | A | PA | possibly damaging |
| rs11773504 | NP_055266    | A | T | AT | benign            |
| rs11773504 | NP_940820    | A | T | AT | benign            |
| rs11774228 | XP_044622    | V | I | VI | benign            |
| rs11774978 | NP_001001481 | S | N | SN | benign            |
| rs11774978 | NP_060769    | S | N | SN | benign            |
| rs11775636 | NP_991108    | A | V | AV | benign            |
| rs11777194 | XP_291266    | G | R | GR | probably damaging |
| rs11778314 | NP_991108    | R | Q | RQ | benign            |
| rs11778936 | NP_065208    | L | I | LI | benign            |
| rs11778936 | NP_065209    | L | I | LI | benign            |
| rs11778936 | NP_000028    | L | I | LI | benign            |
| rs11778936 | NP_065210    | L | I | LI | benign            |
| rs11779866 | XP_294387    | C | Y | CY | probably damaging |
| rs11780509 | XP_294387    | R | K | RK | benign            |
| rs11781942 | XP_372063    | R | C | RC | benign            |
| rs11784175 | XP_294387    | N | Y | NY | possibly damaging |
| rs11784192 | XP_294387    | I | V | IV | benign            |
| rs11784582 | NP_079446    | D | N | DN | possibly damaging |
| rs11784582 | NP_079146    | D | N | DN | possibly damaging |
| rs11786471 | NP_478136    | G | A | GA | benign            |
| rs11788702 | XP_088459    | A | T | AT | benign            |
| rs11788921 | NP_005085    | P | S | PS | possibly damaging |
| rs11789099 | NP_982272    | E | K | EK | benign            |
| rs11789780 | NP_849150    | G | D | GD | possibly damaging |
| rs11790644 | XP_374297    | L | F | LF | benign            |
| rs11790968 | NP_006561    | I | M | IM | benign            |
| rs11791045 | NP_036568    | C | R | CR | benign            |
| rs11791045 | NP_758516    | C | R | CR | probably damaging |
| rs11791683 | NP_689499    | G | S | GS | benign            |
| rs11791754 | XP_029962    | L | V | LV | benign            |
| rs11792065 | NP_003118    | Q | R | QR | benign            |
| rs11792214 | NP_002723    | F | L | FL | probably damaging |
| rs11793196 | NP_036276    | V | I | VI | benign            |
| rs11793927 | XP_376830    | T | P | TP | benign            |
| rs11794148 | XP_372128    | K | E | KE | benign            |
| rs11794210 | NP_005038    | D | N | DN | possibly damaging |

|            |           |   |   |    |                   |
|------------|-----------|---|---|----|-------------------|
| rs11794921 | NP_387504 | A | S | AS | benign            |
| rs11795021 | NP_036568 | C | Y | CY | benign            |
| rs11795021 | NP_758516 | C | Y | CY | probably damaging |
| rs11795057 | NP_758516 | P | A | PA | possibly damaging |
| rs11795057 | NP_036568 | P | A | PA | possibly damaging |
| rs11795316 | NP_066011 | D | A | DA | possibly damaging |
| rs11795404 | NP_055129 | S | I | SI | possibly damaging |
| rs11795910 | NP_689845 | A | T | AT | benign            |
| rs11796620 | NP_689410 | G | S | GS | benign            |
| rs11796620 | NP_689412 | G | S | GS | benign            |
| rs11796620 | NP_689409 | G | S | GS | benign            |
| rs11796785 | XP_372199 | H | P | HP | probably damaging |
| rs11797118 | NP_689794 | T | I | TI | benign            |
| rs11797456 | NP_066943 | G | S | GS | benign            |
| rs11798104 | NP_068576 | W | C | WC | probably damaging |
| rs11798214 | XP_298045 | S | C | SC | benign            |
| rs11798342 | NP_000381 | V | A | VA | benign            |
| rs11798742 | XP_377073 | P | S | PS | probably damaging |
| rs11798742 | NP_878908 | P | S | PS | probably damaging |
| rs11798756 | XP_377073 | L | V | LV | benign            |
| rs11798756 | NP_878908 | L | V | LV | benign            |
| rs11798842 | NP_005384 | L | F | LF | benign            |
| rs11799215 | NP_004645 | R | K | RK | benign            |
| rs11799647 | NP_000245 | I | V | IV | benign            |
| rs11799951 | NP_031374 | A | V | AV | benign            |
| rs11799966 | NP_076427 | F | S | FS | possibly damaging |
| rs11799995 | XP_114067 | R | C | RC | possibly damaging |
| rs11800088 | NP_037485 | N | S | NS | possibly damaging |
| rs11800305 | NP_060530 | I | V | IV | benign            |
| rs11800462 | NP_683866 | D | G | DG | benign            |
| rs11800462 | NP_683867 | D | G | DG | benign            |
| rs11800462 | NP_683868 | D | G | DG | benign            |
| rs11800462 | NP_683869 | D | G | DG | benign            |
| rs11800462 | NP_683870 | D | G | DG | benign            |
| rs11800462 | NP_683872 | D | G | DG | benign            |
| rs11800462 | NP_683874 | D | G | DG | benign            |
| rs11800462 | NP_683873 | D | G | DG | possibly damaging |
| rs11800891 | XP_375682 | V | I | VI | benign            |
| rs11802875 | NP_663735 | L | S | LS | benign            |
| rs11802902 | NP_060204 | H | Q | HQ | benign            |
| rs11803515 | XP_036299 | P | S | PS | possibly damaging |
| rs11803802 | NP_775845 | G | C | GC | probably damaging |
| rs11804131 | NP_003030 | T | S | TS | possibly damaging |
| rs11804152 | NP_000560 | V | E | VE | possibly damaging |
| rs11804257 | NP_000553 | E | K | EK | benign            |
| rs11804414 | NP_839943 | Q | H | QH | possibly damaging |

|            |           |   |   |    |                   |
|------------|-----------|---|---|----|-------------------|
| rs11805194 | NP_060700 | I | V | IV | benign            |
| rs11805972 | NP_005549 | P | Q | PQ | possibly damaging |
| rs11806371 | NP_689705 | P | L | PL | probably damaging |
| rs11806812 | NP_005540 | N | S | NS | benign            |
| rs11807350 | NP_005090 | R | K | RK | benign            |
| rs11807956 | NP_000636 | A | T | AT | benign            |
| rs11807956 | NP_000637 | A | T | AT | benign            |
| rs11807956 | NP_000635 | A | T | AT | benign            |
| rs11808092 | XP_496371 | Q | H | QH | possibly damaging |
| rs11808228 | NP_060754 | V | A | VA | benign            |
| rs11809887 | NP_015563 | I | V | IV | benign            |
| rs11809887 | NP_015562 | I | V | IV | benign            |
| rs11809887 | NP_004790 | I | V | IV | benign            |
| rs11812769 | XP_374765 | P | L | PL | probably damaging |
| rs11812966 | NP_071346 | R | K | RK | benign            |
| rs11813789 | NP_005019 | L | I | LI | benign            |
| rs11815728 | NP_071760 | V | L | VL | benign            |
| rs11815732 | NP_660207 | E | Q | EQ | benign            |
| rs11817391 | NP_997255 | S | L | SL | possibly damaging |
| rs11817448 | NP_620311 | A | S | AS | benign            |
| rs11817448 | NP_055391 | A | S | AS | benign            |
| rs11817448 | NP_620310 | A | S | AS | benign            |
| rs11818358 | NP_079079 | G | A | GA | benign            |
| rs11818372 | NP_079079 | Q | H | QH | possibly damaging |
| rs11818724 | NP_055704 | Q | R | QR | benign            |
| rs11818820 | XP_374831 | K | Q | KQ | benign            |
| rs11819496 | NP_056305 | R | T | RT | probably damaging |
| rs11819601 | NP_775104 | I | V | IV | benign            |
| rs11819656 | NP_003165 | C | W | CW | probably damaging |
| rs11819656 | NP_068506 | C | W | CW | probably damaging |
| rs11819837 | NP_940876 | T | P | TP | benign            |
| rs11820003 | NP_006148 | V | I | VI | benign            |
| rs11820589 | NP_116114 | P | L | PL | probably damaging |
| rs11821058 | XP_495895 | V | G | VG | probably damaging |
| rs11822318 | NP_001633 | Q | R | QR | possibly damaging |
| rs11822837 | NP_004299 | R | C | RC | probably damaging |
| rs11823114 | NP_689849 | A | T | AT | benign            |
| rs11823170 | XP_096472 | L | R | LR | benign            |
| rs11823314 | XP_495872 | V | A | VA | benign            |
| rs11823569 | NP_473371 | V | I | VI | benign            |
| rs11823828 | XP_372368 | F | L | FL | benign            |
| rs11823842 | XP_372368 | F | L | FL | benign            |
| rs11824499 | NP_000363 | N | I | NI | probably damaging |
| rs11824708 | NP_612202 | D | Y | DY | probably damaging |
| rs11825056 | NP_113606 | L | V | LV | benign            |
| rs11825253 | XP_495874 | G | E | GE | probably damaging |



|            |           |   |   |    |                   |
|------------|-----------|---|---|----|-------------------|
| rs11825834 | NP_005133 | G | R | GR | possibly damaging |
| rs11825964 | XP_291859 | Y | H | YH | benign            |
| rs11826041 | XP_090203 | N | S | NS | benign            |
| rs11826199 | NP_659455 | P | R | PR | probably damaging |
| rs11826236 | NP_078833 | D | N | DN | benign            |
| rs11826502 | NP_000363 | P | L | PL | probably damaging |
| rs11826569 | XP_173132 | V | I | VI | benign            |
| rs11826683 | NP_569710 | R | H | RH | benign            |
| rs11826683 | NP_005691 | R | H | RH | benign            |
| rs11826878 | XP_372424 | S | A | SA | benign            |
| rs11827140 | XP_290517 | G | R | GR | possibly damaging |
| rs11827177 | XP_495878 | V | G | VG | possibly damaging |
| rs11827718 | NP_849156 | E | K | EK | benign            |
| rs11827843 | XP_372437 | T | M | TM | benign            |
| rs11828133 | NP_620599 | A | D | AD | possibly damaging |
| rs11828459 | NP_055880 | D | N | DN | benign            |
| rs11828782 | XP_291980 | R | L | RL | benign            |
| rs11828801 | NP_733840 | S | P | SP | benign            |
| rs11828801 | NP_078894 | S | P | SP | benign            |
| rs11829948 | NP_008828 | A | V | AV | benign            |
| rs11830660 | NP_055585 | S | N | SN | benign            |
| rs11831360 | NP_997228 | A | G | AG | benign            |
| rs11831931 | XP_374989 | L | F | LF | benign            |
| rs11832940 | XP_171581 | A | S | AS | possibly damaging |
| rs11832979 | XP_291989 | V | G | VG | possibly damaging |
| rs11833101 | NP_995324 | A | V | AV | benign            |
| rs11833399 | NP_002141 | R | Q | RQ | possibly damaging |
| rs11833801 | NP_942122 | V | M | VM | benign            |
| rs11834413 | NP_001231 | D | N | DN | benign            |
| rs11834471 | XP_290598 | G | R | GR | possibly damaging |
| rs11834625 | NP_777602 | L | S | LS | benign            |
| rs11834933 | NP_666018 | F | V | FV | benign            |
| rs11835301 | NP_055435 | R | L | RL | probably damaging |
| rs11835301 | NP_705897 | R | L | RL | probably damaging |
| rs11835321 | XP_171581 | M | T | MT | probably damaging |
| rs11835821 | NP_689853 | T | S | TS | benign            |
| rs11836060 | NP_775862 | R | Q | RQ | benign            |
| rs11836126 | NP_005545 | P | S | PS | probably damaging |
| rs11836979 | NP_976328 | D | A | DA | probably damaging |
| rs11837038 | NP_055523 | V | G | VG | possibly damaging |
| rs11837375 | NP_689985 | A | S | AS | benign            |
| rs11837584 | NP_000543 | C | F | CF | probably damaging |
| rs11838055 | NP_076408 | T | M | TM | benign            |
| rs11838270 | NP_003267 | K | E | KE | benign            |
| rs11839380 | NP_055178 | K | R | KR | benign            |
| rs11840035 | NP_079255 | A | S | AS | benign            |

|            |           |   |   |    |                   |
|------------|-----------|---|---|----|-------------------|
| rs11840163 | NP_056382 | Q | P | QP | benign            |
| rs11840292 | XP_062890 | I | T | IT | probably damaging |
| rs11841997 | NP_004120 | M | I | MI | benign            |
| rs11842935 | NP_006484 | E | A | EA | benign            |
| rs11843478 | NP_112173 | D | A | DA | possibly damaging |
| rs11844594 | XP_370769 | L | P | LP | probably damaging |
| rs11844617 | XP_495998 | P | T | PT | benign            |
| rs11845046 | NP_473365 | I | M | IM | benign            |
| rs11845272 | NP_055389 | S | A | SA | benign            |
| rs11845640 | NP_004265 | A | V | AV | benign            |
| rs11845676 | XP_375105 | A | T | AT | benign            |
| rs11846317 | NP_056120 | T | P | TP | benign            |
| rs11846740 | XP_090885 | A | V | AV | benign            |
| rs11846991 | NP_006246 | D | Y | DY | probably damaging |
| rs11847151 | NP_002462 | L | M | LM | benign            |
| rs11848004 | XP_495998 | A | T | AT | benign            |
| rs11848295 | NP_777573 | P | S | PS | possibly damaging |
| rs11848954 | NP_689658 | G | A | GA | benign            |
| rs11850175 | NP_954874 | P | A | PA | benign            |
| rs11850175 | NP_954993 | P | A | PA | benign            |
| rs11850175 | NP_872315 | P | A | PA | benign            |
| rs11850949 | XP_290629 | L | V | LV | benign            |
| rs11851376 | NP_004230 | R | K | RK | benign            |
| rs11852063 | XP_050278 | A | V | AV | benign            |
| rs11852361 | NP_000048 | P | L | PL | probably damaging |
| rs11854184 | NP_055516 | V | L | VL | benign            |
| rs11854484 | NP_004203 | P | L | PL | benign            |
| rs11855663 | NP_150253 | A | T | AT | benign            |
| rs11855663 | NP_002666 | A | T | AT | benign            |
| rs11855663 | NP_150241 | A | T | AT | benign            |
| rs11855663 | NP_150252 | A | T | AT | benign            |
| rs11855663 | NP_150242 | A | T | AT | benign            |
| rs11855663 | NP_150247 | A | T | AT | benign            |
| rs11855663 | NP_150243 | A | T | AT | benign            |
| rs11856476 | XP_085234 | S | F | SF | benign            |
| rs11857283 | XP_031744 | P | S | PS | benign            |
| rs11857384 | NP_653199 | R | H | RH | benign            |
| rs11857527 | NP_689549 | S | P | SP | possibly damaging |
| rs11857531 | XP_372548 | D | N | DN | possibly damaging |
| rs11857906 | NP_997400 | R | H | RH | possibly damaging |
| rs11858113 | NP_733468 | T | M | TM | benign            |
| rs11858113 | NP_653091 | T | M | TM | benign            |
| rs11858145 | XP_375185 | G | V | GV | possibly damaging |
| rs11858624 | NP_056432 | P | H | PH | probably damaging |
| rs11859030 | NP_006653 | S | Y | SY | benign            |
| rs11859950 | XP_375358 | V | M | VM | benign            |

|            |           |   |   |    |                   |
|------------|-----------|---|---|----|-------------------|
| rs11860042 | XP_377407 | A | T | AT | benign            |
| rs11860295 | XP_290684 | T | I | TI | benign            |
| rs11860456 | NP_659461 | D | E | DE | benign            |
| rs11860946 | NP_659461 | H | Q | HQ | benign            |
| rs11861251 | NP_000623 | M | T | MT | benign            |
| rs11861325 | XP_085347 | S | C | SC | benign            |
| rs11861980 | NP_001162 | R | G | RG | possibly damaging |
| rs11862366 | XP_085347 | S | T | ST | benign            |
| rs11862754 | NP_000503 | L | M | LM | benign            |
| rs11863511 | NP_002475 | E | A | EA | benign            |
| rs11863893 | NP_003357 | R | H | RH | benign            |
| rs11863919 | NP_055309 | M | I | MI | benign            |
| rs11864149 | NP_057235 | R | H | RH | benign            |
| rs11864159 | NP_079123 | T | I | TI | benign            |
| rs11864319 | XP_372648 | A | V | AV | benign            |
| rs11864607 | NP_004195 | V | I | VI | benign            |
| rs11864607 | NP_683721 | V | I | VI | benign            |
| rs11865305 | XP_497515 | R | K | RK | possibly damaging |
| rs11865588 | NP_079136 | D | N | DN | benign            |
| rs11865916 | NP_777584 | V | I | VI | benign            |
| rs11866302 | NP_757384 | A | P | AP | possibly damaging |
| rs11867457 | NP_057070 | L | P | LP | possibly damaging |
| rs11867613 | XP_371018 | L | P | LP | possibly damaging |
| rs11867613 | XP_085606 | L | P | LP | possibly damaging |
| rs11867808 | NP_003940 | R | W | RW | possibly damaging |
| rs11867874 | NP_001131 | L | P | LP | possibly damaging |
| rs11868111 | NP_004515 | A | T | AT | possibly damaging |
| rs11868727 | NP_056109 | R | K | RK | benign            |
| rs11868877 | XP_375397 | V | M | VM | benign            |
| rs11868942 | XP_496245 | I | L | IL | benign            |
| rs11868946 | XP_085578 | E | G | EG | possibly damaging |
| rs11870172 | NP_071908 | N | T | NT | possibly damaging |
| rs11870245 | NP_006669 | T | I | TI | possibly damaging |
| rs11870360 | NP_009133 | S | L | SL | possibly damaging |
| rs11870434 | NP_055613 | T | P | TP | possibly damaging |
| rs11870440 | NP_004862 | A | T | AT | benign            |
| rs11870627 | NP_997229 | G | R | GR | possibly damaging |
| rs11870983 | NP_001363 | K | R | KR | benign            |
| rs11871037 | NP_001363 | K | N | KN | possibly damaging |
| rs11871287 | NP_057315 | V | A | VA | benign            |
| rs11871553 | XP_496245 | K | R | KR | benign            |
| rs11872089 | XP_496215 | E | Q | EQ | benign            |
| rs11872364 | NP_005550 | K | E | KE | benign            |
| rs11872520 | NP_075563 | R | Q | RQ | possibly damaging |
| rs11872520 | NP_613074 | R | Q | RQ | possibly damaging |
| rs11873372 | XP_497598 | G | R | GR | possibly damaging |

|            |           |   |   |    |                   |
|------------|-----------|---|---|----|-------------------|
| rs11873969 | NP_001935 | S | I | SI | possibly damaging |
| rs11874468 | NP_056025 | K | Q | KQ | benign            |
| rs11874681 | NP_817123 | A | T | AT | benign            |
| rs11876200 | NP_002638 | F | V | FV | possibly damaging |
| rs11878056 | XP_497598 | P | L | PL | probably damaging |
| rs11878524 | NP_078967 | E | K | EK | benign            |
| rs11878540 | NP_787106 | N | D | ND | benign            |
| rs11878617 | NP_777607 | R | S | RS | benign            |
| rs11879148 | NP_000225 | P | L | PL | possibly damaging |
| rs11879305 | XP_290865 | A | V | AV | benign            |
| rs11879402 | NP_003191 | T | A | TA | benign            |
| rs11879465 | NP_006376 | A | V | AV | benign            |
| rs11879465 | NP_942152 | A | V | AV | benign            |
| rs11879620 | NP_057524 | T | A | TA | benign            |
| rs11879710 | NP_000914 | R | W | RW | probably damaging |
| rs11879884 | XP_496314 | Q | P | QP | possibly damaging |
| rs11880024 | XP_497637 | G | S | GS | benign            |
| rs11880031 | NP_620129 | L | V | LV | benign            |
| rs11880084 | NP_036446 | L | F | LF | benign            |
| rs11880084 | NP_839942 | L | F | LF | benign            |
| rs11880090 | NP_036446 | S | L | SL | benign            |
| rs11880090 | NP_839942 | S | L | SL | benign            |
| rs11880184 | XP_065153 | T | A | TA | benign            |
| rs11880330 | NP_037492 | K | E | KE | benign            |
| rs11880551 | NP_066296 | L | V | LV | benign            |
| rs11880658 | NP_114429 | G | R | GR | benign            |
| rs11880694 | XP_375553 | A | V | AV | benign            |
| rs11880771 | NP_065863 | E | K | EK | benign            |
| rs11880853 | XP_497631 | Y | D | YD | probably damaging |
| rs11880955 | XP_372712 | I | L | IL | benign            |
| rs11881032 | XP_375633 | N | T | NT | probably damaging |
| rs11881120 | NP_277048 | E | Q | EQ | benign            |
| rs11881179 | NP_055774 | I | V | IV | benign            |
| rs11881304 | NP_001401 | R | K | RK | benign            |
| rs11881580 | NP_775750 | R | C | RC | probably damaging |
| rs11881770 | NP_008836 | P | R | PR | probably damaging |
| rs11882152 | NP_036467 | S | T | ST | possibly damaging |
| rs11882250 | NP_001763 | F | L | FL | benign            |
| rs11882548 | XP_292832 | K | M | KM | probably damaging |
| rs11882842 | NP_004098 | R | K | RK | benign            |
| rs11882865 | NP_057580 | T | A | TA | benign            |
| rs11883041 | NP_060191 | T | P | TP | possibly damaging |
| rs11883132 | NP_006854 | P | H | PH | probably damaging |
| rs11883178 | NP_036509 | R | H | RH | benign            |
| rs11883242 | NP_775908 | T | S | TS | benign            |
| rs11883260 | NP_653291 | R | T | RT | possibly damaging |

|            |           |   |   |    |                   |
|------------|-----------|---|---|----|-------------------|
| rs11883277 | NP_002771 | R | L | RL | benign            |
| rs11883277 | NP_998798 | R | L | RL | benign            |
| rs11883278 | NP_002771 | Q | H | QH | benign            |
| rs11883278 | NP_998798 | Q | H | QH | benign            |
| rs11883343 | NP_065931 | T | M | TM | possibly damaging |
| rs11883397 | XP_290865 | Q | H | QH | benign            |
| rs11883500 | NP_077006 | T | I | TI | possibly damaging |
| rs11884856 | XP_372911 | M | L | ML | benign            |
| rs11885953 | NP_660343 | N | S | NS | benign            |
| rs11887168 | XP_496551 | F | I | FI | possibly damaging |
| rs11887523 | XP_371481 | A | T | AT | benign            |
| rs11887534 | NP_071882 | D | H | DH | possibly damaging |
| rs11888208 | NP_002967 | I | V | IV | benign            |
| rs11889349 | NP_659429 | M | V | MV | possibly damaging |
| rs11889701 | XP_496593 | R | H | RH | probably damaging |
| rs11889741 | XP_496593 | C | Y | CY | benign            |
| rs11889831 | NP_006560 | K | N | KN | benign            |
| rs11889832 | NP_006560 | K | E | KE | benign            |
| rs11890468 | NP_775099 | Q | R | QR | benign            |
| rs11890512 | NP_775099 | N | H | NH | benign            |
| rs11891241 | XP_372911 | E | D | ED | benign            |
| rs11891776 | NP_976221 | A | S | AS | benign            |
| rs11891778 | NP_775099 | R | G | RG | possibly damaging |
| rs11892325 | NP_055184 | V | M | VM | benign            |
| rs11892365 | NP_002821 | E | K | EK | benign            |
| rs11892763 | NP_620482 | E | K | EK | benign            |
| rs11893062 | NP_659432 | S | F | SF | benign            |
| rs11893062 | NP_945314 | S | F | SF | benign            |
| rs11893062 | NP_663621 | S | F | SF | possibly damaging |
| rs11893228 | NP_919224 | R | H | RH | benign            |
| rs11893228 | NP_919303 | R | H | RH | benign            |
| rs11893228 | NP_919304 | R | H | RH | benign            |
| rs11893228 | NP_004793 | R | H | RH | benign            |
| rs11893478 | NP_006560 | A | V | AV | benign            |
| rs11894115 | NP_149055 | V | I | VI | benign            |
| rs11894733 | NP_849143 | T | I | TI | possibly damaging |
| rs11895564 | NP_000201 | A | T | AT | benign            |
| rs11896614 | NP_005804 | N | D | ND | benign            |
| rs11898176 | NP_060421 | P | L | PL | probably damaging |
| rs11898176 | NP_060221 | P | L | PL | probably damaging |
| rs11898181 | XP_371592 | R | H | RH | benign            |
| rs11898942 | XP_208281 | P | L | PL | probably damaging |
| rs11899555 | NP_079137 | I | V | IV | benign            |
| rs11900987 | NP_596870 | N | I | NI | probably damaging |
| rs11901202 | NP_444506 | H | Y | HY | benign            |
| rs11902811 | NP_775816 | I | V | IV | benign            |

|            |           |   |   |    |                   |
|------------|-----------|---|---|----|-------------------|
| rs11903115 | XP_034594 | D | V | DV | possibly damaging |
| rs11903403 | NP_775100 | S | R | SR | benign            |
| rs11903659 | XP_497863 | A | T | AT | benign            |
| rs11904930 | NP_056415 | V | M | VM | benign            |
| rs11904972 | XP_293160 | F | L | FL | benign            |
| rs11904974 | XP_378983 | A | E | AE | benign            |
| rs11905003 | XP_378983 | R | P | RP | possibly damaging |
| rs11905247 | NP_955400 | Q | P | QP | possibly damaging |
| rs11905247 | NP_056453 | Q | P | QP | possibly damaging |
| rs11905328 | NP_057733 | T | P | TP | benign            |
| rs11905938 | NP_000169 | P | S | PS | possibly damaging |
| rs11906845 | NP_208384 | A | V | AV | benign            |
| rs11907253 | NP_115998 | R | H | RH | benign            |
| rs11907355 | NP_777557 | P | T | PT | possibly damaging |
| rs11908093 | NP_542789 | Q | R | QR | benign            |
| rs11908296 | NP_060365 | G | V | GV | possibly damaging |
| rs11908302 | NP_071444 | P | S | PS | possibly damaging |
| rs11908302 | NP_647478 | P | S | PS | possibly damaging |
| rs11908823 | NP_115571 | T | A | TA | benign            |
| rs11908823 | NP_478063 | T | A | TA | benign            |
| rs11908823 | NP_620304 | T | A | TA | benign            |
| rs11908823 | NP_620305 | T | A | TA | benign            |
| rs11908823 | NP_003094 | T | A | TA | benign            |
| rs11908882 | XP_086761 | N | K | NK | possibly damaging |
| rs11910214 | NP_000374 | P | L | PL | probably damaging |
| rs11910483 | NP_001840 | I | L | IL | benign            |
| rs11911404 | XP_497781 | N | K | NK | benign            |
| rs11912359 | XP_496486 | K | T | KT | benign            |
| rs11912559 | NP_066919 | S | N | SN | benign            |
| rs11913323 | NP_008863 | L | P | LP | possibly damaging |
| rs11913323 | NP_599031 | L | P | LP | possibly damaging |
| rs11913323 | NP_599032 | L | P | LP | possibly damaging |
| rs11913706 | XP_032997 | P | A | PA | benign            |
| rs11913728 | NP_008863 | A | V | AV | benign            |
| rs11913728 | NP_599031 | A | V | AV | benign            |
| rs11913728 | NP_599032 | A | V | AV | benign            |
| rs11914085 | NP_005288 | G | R | GR | benign            |
| rs11914332 | XP_293599 | R | P | RP | possibly damaging |
| rs11915149 | XP_031246 | S | C | SC | benign            |
| rs11915374 | XP_039796 | I | T | IT | benign            |
| rs11917204 | NP_653316 | R | W | RW | benign            |
| rs11917222 | NP_056039 | L | V | LV | benign            |
| rs11917468 | NP_775814 | A | V | AV | benign            |
| rs11917716 | NP_005450 | A | V | AV | benign            |
| rs11918974 | NP_078897 | S | P | SP | benign            |
| rs11918990 | XP_376254 | R | H | RH | benign            |

|            |           |   |   |    |                   |
|------------|-----------|---|---|----|-------------------|
| rs11919896 | NP_689607 | G | R | GR | possibly damaging |
| rs11919919 | NP_002879 | D | V | DV | probably damaging |
| rs11919919 | NP_996846 | D | V | DV | probably damaging |
| rs11919970 | NP_001957 | Q | K | QK | possibly damaging |
| rs11920433 | NP_444257 | R | G | RG | benign            |
| rs11920433 | NP_444254 | R | G | RG | possibly damaging |
| rs11920433 | NP_444255 | R | G | RG | possibly damaging |
| rs11920433 | NP_444256 | R | G | RG | possibly damaging |
| rs11920433 | NP_444253 | R | G | RG | possibly damaging |
| rs11921054 | NP_000088 | R | C | RC | possibly damaging |
| rs11921691 | NP_775841 | K | R | KR | benign            |
| rs11921769 | XP_067585 | E | A | EA | benign            |
| rs11922014 | XP_170597 | R | C | RC | benign            |
| rs11923380 | NP_078897 | M | V | MV | possibly damaging |
| rs11923495 | NP_689886 | R | W | RW | possibly damaging |
| rs11924014 | NP_002069 | R | S | RS | possibly damaging |
| rs11924644 | NP_077310 | A | V | AV | benign            |
| rs11925638 | NP_115542 | K | Q | KQ | benign            |
| rs11925638 | NP_569055 | K | Q | KQ | benign            |
| rs11926958 | NP_055457 | F | L | FL | benign            |
| rs11927120 | XP_293633 | G | S | GS | possibly damaging |
| rs11927618 | NP_001957 | L | S | LS | benign            |
| rs11927897 | NP_689610 | R | Q | RQ | benign            |
| rs11928913 | NP_003326 | P | S | PS | possibly damaging |
| rs11929241 | NP_056984 | S | I | SI | possibly damaging |
| rs11930003 | XP_374902 | S | L | SL | benign            |
| rs11932767 | NP_002904 | E | D | ED | benign            |
| rs11934749 | NP_006578 | H | R | HR | possibly damaging |
| rs11934801 | NP_000194 | G | R | GR | benign            |
| rs11935573 | NP_060109 | S | L | SL | benign            |
| rs11937432 | NP_078787 | I | T | IT | benign            |
| rs11937881 | XP_496682 | Q | R | QR | benign            |
| rs11938093 | NP_001720 | L | M | LM | benign            |
| rs11938345 | NP_653246 | S | N | SN | benign            |
| rs11939657 | XP_497987 | C | S | CS | probably damaging |
| rs11940735 | XP_373035 | D | Y | DY | benign            |
| rs11940827 | NP_002328 | E | Q | EQ | benign            |
| rs11940942 | XP_496682 | V | I | VI | benign            |
| rs11941467 | NP_079225 | A | S | AS | benign            |
| rs11942361 | NP_078858 | E | K | EK | benign            |
| rs11943863 | NP_000133 | F | C | FC | benign            |
| rs11944159 | NP_612398 | P | L | PL | benign            |
| rs11944325 | NP_055291 | V | M | VM | benign            |
| rs11945830 | NP_612394 | V | M | VM | benign            |
| rs11947418 | NP_937822 | H | Q | HQ | probably damaging |
| rs11947742 | NP_689983 | T | M | TM | benign            |

|            |           |   |   |    |                   |
|------------|-----------|---|---|----|-------------------|
| rs11948907 | NP_055588 | R | G | RG | possibly damaging |
| rs11949133 | NP_110420 | A | T | AT | benign            |
| rs11949133 | NP_995308 | A | T | AT | benign            |
| rs11949651 | XP_498018 | S | F | SF | possibly damaging |
| rs11951603 | XP_209704 | T | M | TM | probably damaging |
| rs11952056 | NP_937986 | S | T | ST | benign            |
| rs11952056 | NP_003210 | S | T | ST | benign            |
| rs11952056 | NP_937983 | S | T | ST | benign            |
| rs11952056 | NP_937984 | S | T | ST | benign            |
| rs11952995 | XP_499223 | V | L | VL | benign            |
| rs11953029 | XP_209704 | T | A | TA | benign            |
| rs11953478 | NP_114417 | G | E | GE | benign            |
| rs11953798 | XP_209704 | C | R | CR | benign            |
| rs11953822 | NP_612357 | M | L | ML | benign            |
| rs11954456 | NP_075252 | S | R | SR | probably damaging |
| rs11954456 | NP_998812 | S | R | SR | probably damaging |
| rs11954652 | NP_057305 | F | L | FL | benign            |
| rs11954740 | NP_006698 | S | N | SN | benign            |
| rs11955074 | NP_478137 | V | I | VI | benign            |
| rs11955580 | XP_068430 | E | Q | EQ | benign            |
| rs11955611 | XP_116396 | P | L | PL | benign            |
| rs11956147 | NP_085116 | R | G | RG | benign            |
| rs11956781 | NP_057065 | H | L | HL | probably damaging |
| rs11956781 | NP_741960 | H | L | HL | probably damaging |
| rs11956826 | NP_061759 | F | L | FL | possibly damaging |
| rs11956837 | NP_644810 | M | V | MV | benign            |
| rs11957063 | XP_047995 | V | F | VF | possibly damaging |
| rs11959820 | NP_573570 | R | S | RS | possibly damaging |
| rs11961225 | NP_071756 | R | Q | RQ | benign            |
| rs11961407 | NP_061925 | R | W | RW | benign            |
| rs11962520 | NP_055904 | T | I | TI | benign            |
| rs11963184 | NP_004743 | K | N | KN | benign            |
| rs11963186 | NP_004743 | D | N | DN | benign            |
| rs11963294 | NP_002215 | R | Q | RQ | benign            |
| rs11964847 | NP_116130 | P | S | PS | benign            |
| rs11965377 | XP_496799 | R | G | RG | possibly damaging |
| rs11965942 | NP_056370 | Q | R | QR | benign            |
| rs11966331 | NP_079534 | R | Q | RQ | benign            |
| rs11966370 | NP_006623 | P | L | PL | probably damaging |
| rs11966382 | NP_009091 | V | M | VM | benign            |
| rs11966400 | NP_663630 | P | A | PA | benign            |
| rs11966617 | NP_898901 | D | A | DA | possibly damaging |
| rs11966617 | NP_003949 | D | A | DA | possibly damaging |
| rs11966704 | NP_057440 | G | A | GA | benign            |
| rs11967003 | NP_056948 | A | G | AG | benign            |
| rs11967753 | NP_115859 | R | G | RG | possibly damaging |



|            |           |   |   |    |                   |
|------------|-----------|---|---|----|-------------------|
| rs11968051 | XP_376535 | V | G | VG | possibly damaging |
| rs11968123 | XP_498078 | M | R | MR | benign            |
| rs11968285 | XP_294019 | A | T | AT | benign            |
| rs11968301 | NP_002368 | I | V | IV | benign            |
| rs11968933 | XP_166300 | G | D | GD | possibly damaging |
| rs11969080 | NP_079083 | L | M | LM | benign            |
| rs11969206 | NP_620306 | R | L | RL | possibly damaging |
| rs11969206 | NP_005933 | R | L | RL | possibly damaging |
| rs11969769 | NP_620306 | P | H | PH | possibly damaging |
| rs11969769 | NP_005933 | P | H | PH | possibly damaging |
| rs11970403 | NP_068811 | L | F | LF | benign            |
| rs11970968 | NP_078774 | H | R | HR | probably damaging |
| rs11971167 | NP_000483 | D | N | DN | possibly damaging |
| rs11971829 | NP_853628 | T | M | TM | possibly damaging |
| rs11972717 | NP_003921 | A | S | AS | benign            |
| rs11973761 | NP_775835 | A | D | AD | benign            |
| rs11974041 | NP_057152 | R | Q | RQ | benign            |
| rs11974345 | NP_078987 | G | D | GD | benign            |
| rs11974959 | XP_373223 | W | R | WR | probably damaging |
| rs11975799 | XP_373219 | A | T | AT | benign            |
| rs11976235 | NP_000790 | P | L | PL | benign            |
| rs11976480 | NP_001628 | D | N | DN | benign            |
| rs11976825 | XP_496905 | T | K | TK | benign            |
| rs11976837 | XP_498214 | A | E | AE | benign            |
| rs11976848 | XP_377933 | N | D | ND | benign            |
| rs11976972 | NP_689771 | H | N | HN | probably damaging |
| rs11977152 | XP_291247 | P | A | PA | possibly damaging |
| rs11977216 | NP_078987 | Q | R | QR | benign            |
| rs11977547 | NP_857597 | P | L | PL | probably damaging |
| rs11978101 | NP_689957 | D | N | DN | benign            |
| rs11978404 | NP_003452 | H | L | HL | benign            |
| rs11978680 | NP_689952 | H | P | HP | benign            |
| rs11978899 | NP_060804 | R | K | RK | benign            |
| rs11978942 | XP_371897 | G | S | GS | possibly damaging |
| rs11978967 | XP_498229 | A | E | AE | benign            |
| rs11980085 | XP_379906 | Y | C | YC | probably damaging |
| rs11980163 | XP_379488 | S | P | SP | benign            |
| rs11980216 | NP_620166 | E | K | EK | benign            |
| rs11980596 | NP_115852 | E | D | ED | benign            |
| rs11980797 | NP_078999 | L | V | LV | benign            |
| rs11980797 | NP_891554 | L | V | LV | benign            |
| rs11982797 | XP_373223 | L | P | LP | possibly damaging |
| rs11984226 | XP_498233 | I | T | IT | possibly damaging |
| rs11984293 | NP_620166 | P | Q | PQ | probably damaging |
| rs11984465 | XP_372063 | D | G | DG | possibly damaging |
| rs11984791 | XP_378197 | R | W | RW | possibly damaging |

|            |           |   |   |    |                   |
|------------|-----------|---|---|----|-------------------|
| rs11985241 | NP_653252 | N | S | NS | benign            |
| rs11986329 | NP_079107 | P | S | PS | possibly damaging |
| rs11987299 | XP_374252 | T | A | TA | benign            |
| rs11988457 | XP_291277 | C | W | CW | probably damaging |
| rs11989168 | NP_932159 | R | Q | RQ | benign            |
| rs11989168 | NP_789847 | R | Q | RQ | benign            |
| rs11989168 | NP_067643 | R | Q | RQ | benign            |
| rs11989955 | NP_113649 | H | L | HL | probably damaging |
| rs11990333 | NP_079043 | R | H | RH | benign            |
| rs11990421 | NP_005135 | P | L | PL | probably damaging |
| rs11990421 | NP_060881 | P | L | PL | probably damaging |
| rs11990451 | NP_005135 | S | R | SR | benign            |
| rs11990451 | NP_060881 | S | R | SR | benign            |
| rs11990768 | NP_660202 | R | Q | RQ | benign            |
| rs11990815 | XP_372039 | Q | R | QR | benign            |
| rs11991800 | NP_150601 | C | R | CR | probably damaging |
| rs11991960 | XP_373243 | A | G | AG | benign            |
| rs11993776 | NP_036214 | A | G | AG | benign            |
| rs11994207 | XP_496999 | R | Q | RQ | benign            |
| rs11996036 | NP_006120 | V | I | VI | benign            |
| rs11996470 | XP_374252 | R | S | RS | benign            |
| rs11997191 | XP_088315 | Q | R | QR | benign            |
| rs11998459 | NP_006202 | T | N | TN | benign            |
| rs11998518 | NP_848927 | R | K | RK | benign            |
| rs11999094 | XP_376895 | H | D | HD | probably damaging |
| rs11999308 | NP_671728 | T | I | TI | benign            |
| rs11999454 | NP_036276 | V | G | VG | benign            |
| rs11999686 | XP_497056 | V | G | VG | possibly damaging |
| rs12000150 | NP_694856 | G | A | GA | possibly damaging |
| rs12000402 | XP_294567 | Q | R | QR | benign            |
| rs12001066 | NP_778243 | P | L | PL | possibly damaging |
| rs12001918 | NP_060046 | I | V | IV | benign            |
| rs12002324 | NP_036335 | R | Q | RQ | benign            |
| rs12002428 | NP_005076 | A | T | AT | benign            |
| rs12003404 | NP_000188 | T | P | TP | benign            |
| rs12004651 | NP_067632 | P | A | PA | probably damaging |
| rs12006160 | NP_064530 | A | D | AD | benign            |
| rs12006769 | NP_001640 | A | V | AV | benign            |
| rs12008095 | NP_001513 | L | P | LP | probably damaging |
| rs12008888 | XP_088636 | D | H | DH | possibly damaging |
| rs12009522 | XP_088684 | R | H | RH | benign            |
| rs12009763 | XP_498383 | S | L | SL | benign            |
| rs12009847 | NP_116315 | Q | E | QE | benign            |
| rs12010332 | NP_005355 | S | F | SF | possibly damaging |
| rs12012202 | NP_001640 | I | V | IV | benign            |
| rs12012442 | XP_050478 | E | K | EK | benign            |

|            |           |   |   |    |                   |
|------------|-----------|---|---|----|-------------------|
| rs12012506 | NP_009081 | R | H | RH | possibly damaging |
| rs12012704 | NP_003877 | A | G | AG | benign            |
| rs12012704 | NP_647450 | A | G | AG | benign            |
| rs12012747 | NP_006004 | S | N | SN | benign            |
| rs12013441 | NP_073749 | R | C | RC | possibly damaging |
| rs12013711 | NP_055104 | V | L | VL | benign            |
| rs12014977 | NP_957516 | E | D | ED | benign            |
| rs12021720 | NP_001909 | G | S | GS | benign            |
| rs12021744 | NP_006662 | E | K | EK | benign            |
| rs12021962 | XP_497652 | H | R | HR | benign            |
| rs12022378 | NP_073747 | H | Y | HY | benign            |
| rs12023067 | NP_073583 | V | L | VL | benign            |
| rs12024079 | XP_371230 | H | Y | HY | possibly damaging |
| rs12024104 | XP_371230 | D | E | DE | benign            |
| rs12025066 | NP_060606 | I | V | IV | benign            |
| rs12025869 | NP_037417 | R | T | RT | probably damaging |
| rs12025870 | NP_037417 | Q | H | QH | probably damaging |
| rs12026290 | NP_932157 | V | M | VM | benign            |
| rs12027481 | XP_371236 | R | T | RT | possibly damaging |
| rs12028402 | XP_291577 | Q | R | QR | benign            |
| rs12028487 | NP_940819 | L | V | LV | benign            |
| rs12028487 | NP_068767 | L | V | LV | benign            |
| rs12029683 | NP_079455 | P | H | PH | possibly damaging |
| rs12029771 | NP_660155 | G | D | GD | possibly damaging |
| rs12030004 | NP_003675 | P | L | PL | probably damaging |
| rs12030747 | NP_000300 | E | K | EK | benign            |
| rs12030791 | XP_371210 | L | V | LV | benign            |
| rs12030797 | XP_371210 | L | F | LF | benign            |
| rs12030843 | NP_996769 | L | V | LV | benign            |
| rs12030882 | NP_002688 | E | K | EK | benign            |
| rs12031148 | NP_005048 | L | F | LF | benign            |
| rs12032160 | NP_057317 | E | D | ED | benign            |
| rs12032292 | NP_775179 | Q | H | QH | possibly damaging |
| rs12032292 | NP_963863 | Q | H | QH | possibly damaging |
| rs12032292 | NP_963862 | Q | H | QH | possibly damaging |
| rs12032292 | NP_055652 | Q | H | QH | possibly damaging |
| rs12032332 | NP_060604 | C | Y | CY | probably damaging |
| rs12032393 | NP_115646 | N | S | NS | benign            |
| rs12032435 | XP_030665 | R | H | RH | possibly damaging |
| rs12032464 | XP_497652 | R | Q | RQ | benign            |
| rs12032692 | NP_079464 | T | I | TI | benign            |
| rs12033678 | NP_689424 | S | N | SN | benign            |
| rs12033678 | NP_057060 | S | N | SN | benign            |
| rs12033719 | NP_058515 | T | I | TI | benign            |
| rs12034056 | NP_005586 | F | S | FS | probably damaging |
| rs12034646 | NP_067646 | E | K | EK | benign            |

|            |           |   |   |    |                   |
|------------|-----------|---|---|----|-------------------|
| rs12035024 | NP_057093 | T | I | TI | benign            |
| rs12035264 | NP_127491 | T | I | TI | benign            |
| rs12035909 | NP_620151 | Y | C | YC | probably damaging |
| rs12036186 | NP_057260 | Q | E | QE | benign            |
| rs12036228 | NP_112571 | V | I | VI | benign            |
| rs12036569 | NP_115646 | M | I | MI | possibly damaging |
| rs12036617 | NP_068779 | E | K | EK | benign            |
| rs12036622 | NP_068779 | E | K | EK | benign            |
| rs12036682 | XP_048104 | H | N | HN | possibly damaging |
| rs12036962 | NP_997239 | P | A | PA | benign            |
| rs12037099 | NP_061486 | D | V | DV | probably damaging |
| rs12037099 | NP_005553 | D | V | DV | probably damaging |
| rs12037217 | NP_003912 | A | S | AS | benign            |
| rs12037377 | NP_071761 | H | Y | HY | possibly damaging |
| rs12038033 | NP_002591 | A | V | AV | benign            |
| rs12038082 | NP_733793 | P | S | PS | probably damaging |
| rs12038082 | NP_004832 | P | S | PS | probably damaging |
| rs12038198 | NP_065821 | R | Q | RQ | benign            |
| rs12038884 | NP_671517 | S | R | SR | possibly damaging |
| rs12038884 | NP_056362 | S | R | SR | possibly damaging |
| rs12039262 | NP_443172 | M | T | MT | probably damaging |
| rs12039846 | NP_006247 | E | D | ED | benign            |
| rs12039961 | NP_006754 | V | M | VM | benign            |
| rs12040115 | XP_117174 | A | E | AE | benign            |
| rs12040910 | NP_149118 | H | R | HR | possibly damaging |
| rs12041280 | NP_068777 | A | T | AT | benign            |
| rs12041673 | NP_443171 | L | F | LF | benign            |
| rs12041704 | NP_060143 | D | N | DN | benign            |
| rs12041951 | NP_982279 | T | I | TI | possibly damaging |
| rs12042270 | NP_002642 | A | S | AS | benign            |
| rs12043139 | NP_000636 | R | H | RH | possibly damaging |
| rs12043139 | NP_000637 | R | H | RH | possibly damaging |
| rs12043139 | NP_000635 | R | H | RH | possibly damaging |
| rs12043246 | XP_375809 | D | N | DN | benign            |
| rs12043423 | NP_055281 | R | C | RC | possibly damaging |
| rs12043777 | NP_115640 | D | E | DE | benign            |
| rs12044248 | NP_005586 | F | L | FL | probably damaging |
| rs12044926 | NP_065821 | Q | E | QE | benign            |
| rs12045198 | NP_056146 | V | I | VI | benign            |
| rs12045447 | NP_036546 | T | A | TA | benign            |
| rs12045510 | NP_004687 | V | A | VA | benign            |
| rs12045766 | NP_065883 | R | T | RT | benign            |
| rs12046646 | NP_004506 | S | F | SF | benign            |
| rs12047252 | XP_117174 | M | T | MT | benign            |
| rs12048482 | NP_036483 | M | I | MI | benign            |
| rs12048768 | NP_963922 | R | C | RC | possibly damaging |

|            |           |   |   |    |                   |
|------------|-----------|---|---|----|-------------------|
| rs12049299 | NP_055030 | R | P | RP | possibly damaging |
| rs12049823 | NP_775853 | L | P | LP | possibly damaging |
| rs12051468 | NP_113664 | S | G | SG | benign            |
| rs12051598 | NP_003762 | P | S | PS | benign            |
| rs12052997 | NP_003378 | R | K | RK | benign            |
| rs12053788 | NP_001877 | R | Q | RQ | possibly damaging |
| rs12054046 | NP_778226 | T | A | TA | benign            |
| rs12054059 | NP_703190 | R | Q | RQ | benign            |
| rs12054059 | NP_703191 | R | Q | RQ | benign            |
| rs12054059 | NP_116121 | R | Q | RQ | benign            |
| rs12054095 | NP_066278 | T | R | TR | benign            |
| rs12054882 | NP_005876 | E | K | EK | benign            |
| rs12055850 | NP_116173 | Q | H | QH | benign            |
| rs12057307 | NP_056193 | A | T | AT | benign            |
| rs12057383 | NP_904319 | A | T | AT | benign            |
| rs12057383 | NP_904320 | A | T | AT | benign            |
| rs12057721 | XP_497652 | I | T | IT | benign            |
| rs12057938 | NP_067649 | A | V | AV | benign            |
| rs12058405 | NP_001830 | T | I | TI | probably damaging |
| rs12059066 | NP_940895 | L | I | LI | benign            |
| rs12059349 | NP_036234 | L | M | LM | benign            |
| rs12059562 | XP_375834 | A | V | AV | benign            |
| rs12060052 | NP_004362 | S | F | SF | possibly damaging |
| rs12060764 | XP_497652 | V | A | VA | possibly damaging |
| rs12061020 | NP_055143 | S | F | SF | benign            |
| rs12061027 | NP_078820 | C | Y | CY | benign            |
| rs12061745 | NP_996927 | T | M | TM | benign            |
| rs12061745 | NP_996930 | T | M | TM | benign            |
| rs12061745 | NP_996928 | T | M | TM | benign            |
| rs12061745 | NP_996926 | T | M | TM | benign            |
| rs12061745 | NP_997051 | T | M | TM | benign            |
| rs12061858 | NP_071397 | R | K | RK | benign            |
| rs12061858 | NP_955533 | R | K | RK | benign            |
| rs12061958 | NP_853550 | A | P | AP | benign            |
| rs12062047 | NP_002052 | E | K | EK | benign            |
| rs12062114 | NP_076427 | R | G | RG | possibly damaging |
| rs12062220 | NP_148980 | S | F | SF | benign            |
| rs12062220 | NP_056990 | S | F | SF | benign            |
| rs12062278 | NP_003558 | E | G | EG | benign            |
| rs12062289 | NP_004362 | E | K | EK | possibly damaging |
| rs12062580 | XP_060945 | F | L | FL | benign            |
| rs12063186 | XP_372755 | P | L | PL | probably damaging |
| rs12064925 | NP_057466 | S | F | SF | benign            |
| rs12065373 | NP_689517 | S | N | SN | benign            |
| rs12065473 | NP_061486 | A | P | AP | benign            |
| rs12065473 | NP_005553 | A | P | AP | benign            |

|            |           |   |   |    |                   |
|------------|-----------|---|---|----|-------------------|
| rs12065526 | XP_060580 | T | I | TI | probably damaging |
| rs12065791 | NP_940819 | S | L | SL | possibly damaging |
| rs12065791 | NP_068767 | S | L | SL | possibly damaging |
| rs12065961 | NP_683763 | L | F | LF | possibly damaging |
| rs12066948 | NP_775804 | M | T | MT | benign            |
| rs12067543 | NP_004249 | R | C | RC | benign            |
| rs12068080 | XP_291437 | T | M | TM | possibly damaging |
| rs12068365 | NP_612122 | S | N | SN | benign            |
| rs12068365 | NP_612123 | S | N | SN | benign            |
| rs12068423 | NP_149033 | I | V | IV | benign            |
| rs12068423 | NP_036222 | I | V | IV | benign            |
| rs12068828 | XP_496406 | V | I | VI | benign            |
| rs12068900 | XP_048104 | S | T | ST | benign            |
| rs12069022 | NP_620056 | G | D | GD | possibly damaging |
| rs12069022 | NP_620055 | G | D | GD | possibly damaging |
| rs12069022 | NP_060214 | G | D | GD | possibly damaging |
| rs12069239 | XP_048774 | P | A | PA | benign            |
| rs12069578 | NP_055689 | M | I | MI | possibly damaging |
| rs12069888 | NP_065845 | H | Y | HY | possibly damaging |
| rs12069976 | NP_775804 | F | V | FV | possibly damaging |
| rs12070367 | XP_496379 | R | Q | RQ | benign            |
| rs12070953 | XP_060580 | D | G | DG | benign            |
| rs12071507 | XP_496418 | G | R | GR | possibly damaging |
| rs12072216 | NP_000706 | P | A | PA | possibly damaging |
| rs12072499 | NP_001094 | A | V | AV | benign            |
| rs12072582 | NP_008825 | D | H | DH | benign            |
| rs12072660 | NP_057083 | A | V | AV | benign            |
| rs12072861 | NP_003966 | R | C | RC | probably damaging |
| rs12072880 | XP_378901 | T | R | TR | benign            |
| rs12073565 | XP_089281 | A | G | AG | benign            |
| rs12073613 | XP_048104 | H | Q | HQ | probably damaging |
| rs12074076 | NP_149118 | S | L | SL | benign            |
| rs12074499 | NP_940949 | T | M | TM | possibly damaging |
| rs12074652 | NP_536356 | A | V | AV | benign            |
| rs12075111 | NP_689822 | R | C | RC | benign            |
| rs12075462 | NP_066188 | R | K | RK | benign            |
| rs12075570 | XP_031401 | R | H | RH | benign            |
| rs12075583 | NP_003030 | L | V | LV | benign            |
| rs12075833 | NP_055785 | S | A | SA | benign            |
| rs12075844 | NP_000219 | N | S | NS | benign            |
| rs12076297 | NP_005067 | A | T | AT | benign            |
| rs12076815 | NP_116269 | T | M | TM | possibly damaging |
| rs12077069 | NP_055187 | D | E | DE | benign            |
| rs12077338 | XP_497697 | S | G | SG | benign            |
| rs12077465 | NP_004714 | P | H | PH | possibly damaging |
| rs12078107 | XP_375720 | Q | H | QH | benign            |

|            |           |   |   |    |                   |
|------------|-----------|---|---|----|-------------------|
| rs12078586 | NP_443170 | V | M | VM | benign            |
| rs12078755 | NP_002499 | P | H | PH | probably damaging |
| rs12079481 | NP_115502 | A | G | AG | benign            |
| rs12079514 | NP_000630 | Y | S | YS | probably damaging |
| rs12080688 | NP_055785 | L | V | LV | benign            |
| rs12081093 | XP_048104 | S | I | SI | benign            |
| rs12081249 | NP_060710 | A | T | AT | benign            |
| rs12082295 | NP_689585 | R | Q | RQ | benign            |
| rs12082855 | NP_997197 | I | V | IV | benign            |
| rs12082990 | NP_005637 | L | P | LP | possibly damaging |
| rs12083024 | XP_291438 | C | S | CS | probably damaging |
| rs12083389 | XP_378901 | E | D | ED | benign            |
| rs12083590 | NP_001399 | R | Q | RQ | benign            |
| rs12083722 | NP_056995 | E | K | EK | benign            |
| rs12083859 | NP_115643 | E | D | ED | benign            |
| rs12084067 | NP_055917 | R | Q | RQ | benign            |
| rs12084085 | XP_034086 | S | I | SI | possibly damaging |
| rs12084470 | NP_060238 | L | F | LF | benign            |
| rs12084626 | XP_496390 | P | T | PT | possibly damaging |
| rs12084919 | NP_996671 | V | I | VI | benign            |
| rs12085009 | NP_542172 | E | D | ED | benign            |
| rs12085186 | NP_003748 | A | S | AS | benign            |
| rs12085658 | NP_006247 | Q | R | QR | benign            |
| rs12085877 | NP_006601 | R | H | RH | possibly damaging |
| rs12086307 | NP_114406 | R | W | RW | probably damaging |
| rs12086855 | XP_371328 | I | F | IF | benign            |
| rs12087217 | NP_982279 | A | G | AG | benign            |
| rs12087623 | XP_496370 | T | A | TA | benign            |
| rs12087671 | NP_940948 | I | L | IL | benign            |
| rs12087917 | NP_002516 | L | V | LV | benign            |
| rs12088790 | NP_005549 | L | P | LP | benign            |
| rs12090411 | NP_543154 | Q | R | QR | benign            |
| rs12090608 | XP_086186 | I | M | IM | benign            |
| rs12090611 | XP_031401 | R | Q | RQ | benign            |
| rs12090800 | NP_071394 | D | H | DH | benign            |
| rs12090888 | NP_835223 | M | T | MT | benign            |
| rs12091021 | NP_003106 | S | G | SG | benign            |
| rs12091148 | NP_689822 | Q | R | QR | benign            |
| rs12091190 | NP_064589 | A | T | AT | benign            |
| rs12091253 | NP_000219 | R | L | RL | possibly damaging |
| rs12091554 | NP_361013 | S | A | SA | benign            |
| rs12091678 | NP_060095 | D | E | DE | possibly damaging |
| rs12091750 | XP_290944 | I | T | IT | benign            |
| rs12092598 | NP_078902 | E | K | EK | benign            |
| rs12092878 | NP_071394 | F | I | FI | benign            |
| rs12093126 | NP_067652 | R | H | RH | benign            |

|            |           |   |   |    |                   |
|------------|-----------|---|---|----|-------------------|
| rs12093500 | NP_055917 | A | G | AG | benign            |
| rs12093834 | NP_004249 | R | Q | RQ | benign            |
| rs12094024 | NP_000770 | Y | S | YS | probably damaging |
| rs12094135 | NP_116222 | P | S | PS | benign            |
| rs12094447 | NP_699170 | R | Q | RQ | benign            |
| rs12094805 | NP_001432 | H | R | HR | probably damaging |
| rs12094920 | NP_940949 | V | M | VM | benign            |
| rs12095382 | NP_061946 | G | S | GS | benign            |
| rs12095818 | NP_055816 | D | E | DE | benign            |
| rs12096312 | XP_052561 | R | H | RH | benign            |
| rs12096547 | NP_387506 | D | N | DN | benign            |
| rs12096648 | NP_038469 | D | N | DN | possibly damaging |
| rs12096782 | NP_002548 | P | S | PS | benign            |
| rs12097311 | NP_002212 | A | S | AS | benign            |
| rs12097758 | NP_004249 | V | I | VI | benign            |
| rs12097805 | NP_115612 | E | K | EK | benign            |
| rs12098477 | XP_370541 | T | A | TA | benign            |
| rs12098562 | XP_370541 | A | G | AG | benign            |
| rs12099177 | NP_071405 | R | W | RW | possibly damaging |
| rs12099204 | NP_060729 | I | L | IL | benign            |
| rs12099880 | NP_078961 | A | V | AV | benign            |
| rs12101554 | NP_899232 | A | T | AT | benign            |
| rs12101559 | NP_071918 | I | T | IT | benign            |
| rs12102203 | NP_056078 | S | P | SP | benign            |
| rs12102534 | NP_002377 | T | M | TM | possibly damaging |
| rs12102580 | NP_079358 | P | L | PL | probably damaging |
| rs12103928 | NP_003070 | K | N | KN | possibly damaging |
| rs12103986 | NP_443179 | H | Q | HQ | benign            |
| rs12104280 | XP_371164 | H | Y | HY | benign            |
| rs12105962 | NP_620712 | C | S | CS | probably damaging |
| rs12106280 | NP_945345 | D | V | DV | possibly damaging |
| rs12107045 | NP_542383 | A | V | AV | benign            |
| rs12107252 | NP_001398 | Q | R | QR | benign            |
| rs12107254 | XP_291085 | I | L | IL | benign            |
| rs12107615 | XP_496634 | R | G | RG | benign            |
| rs12107687 | XP_371670 | R | S | RS | probably damaging |
| rs12107841 | XP_171032 | S | G | SG | benign            |
| rs12108463 | NP_006672 | F | L | FL | benign            |
| rs12108814 | NP_004052 | I | T | IT | benign            |
| rs12109475 | NP_689618 | A | V | AV | benign            |
| rs12110451 | NP_055426 | I | V | IV | benign            |
| rs12110554 | NP_002281 | N | S | NS | benign            |
| rs12110938 | NP_722580 | R | C | RC | probably damaging |
| rs12112868 | NP_848658 | R | W | RW | possibly damaging |
| rs12115566 | NP_009102 | A | V | AV | benign            |
| rs12115750 | XP_378080 | S | Y | SY | probably damaging |



|            |           |   |   |    |                   |
|------------|-----------|---|---|----|-------------------|
| rs12116318 | XP_498374 | A | S | AS | benign            |
| rs12116440 | NP_001616 | A | T | AT | benign            |
| rs12116440 | NP_037543 | A | T | AT | benign            |
| rs12117237 | NP_958357 | K | E | KE | benign            |
| rs12117456 | NP_005509 | S | F | SF | possibly damaging |
| rs12118058 | NP_000636 | R | G | RG | probably damaging |
| rs12118058 | NP_000637 | R | G | RG | probably damaging |
| rs12118058 | NP_000635 | R | G | RG | probably damaging |
| rs12118276 | NP_060754 | E | K | EK | benign            |
| rs12118505 | NP_848644 | T | I | TI | benign            |
| rs12118628 | NP_036483 | M | I | MI | benign            |
| rs12118790 | NP_015563 | R | T | RT | possibly damaging |
| rs12118790 | NP_004790 | R | T | RT | possibly damaging |
| rs12118933 | NP_004310 | R | G | RG | possibly damaging |
| rs12118991 | NP_004276 | A | V | AV | benign            |
| rs12119062 | NP_002146 | G | E | GE | probably damaging |
| rs12119874 | XP_372763 | T | A | TA | benign            |
| rs12119908 | NP_653303 | R | H | RH | benign            |
| rs12120084 | XP_375825 | P | A | PA | possibly damaging |
| rs12120756 | NP_982283 | S | R | SR | possibly damaging |
| rs12121210 | NP_002754 | H | R | HR | probably damaging |
| rs12121540 | XP_086186 | Q | P | QP | benign            |
| rs12122278 | NP_001739 | G | S | GS | benign            |
| rs12122770 | NP_003677 | S | G | SG | benign            |
| rs12122770 | NP_569082 | S | G | SG | benign            |
| rs12123403 | XP_372763 | S | L | SL | benign            |
| rs12123482 | NP_115700 | G | E | GE | benign            |
| rs12123573 | NP_942005 | S | C | SC | benign            |
| rs12123573 | NP_942006 | S | C | SC | benign            |
| rs12123778 | NP_061120 | G | R | GR | benign            |
| rs12123896 | NP_054903 | A | G | AG | benign            |
| rs12124336 | NP_055625 | S | A | SA | benign            |
| rs12124464 | XP_496394 | A | T | AT | benign            |
| rs12124464 | XP_375869 | A | T | AT | benign            |
| rs12125245 | NP_055625 | G | V | GV | benign            |
| rs12125701 | NP_039234 | A | S | AS | benign            |
| rs12126269 | NP_004061 | F | Y | FY | benign            |
| rs12126910 | NP_006138 | V | L | VL | benign            |
| rs12127732 | XP_038288 | D | Y | DY | probably damaging |
| rs12127777 | NP_060604 | D | H | DH | possibly damaging |
| rs12127918 | XP_497652 | A | T | AT | benign            |
| rs12127921 | XP_497652 | C | Y | CY | benign            |
| rs12128133 | NP_060912 | S | R | SR | benign            |
| rs12128680 | XP_496394 | E | A | EA | possibly damaging |
| rs12129596 | NP_071372 | S | N | SN | benign            |
| rs12129883 | NP_563578 | I | L | IL | benign            |

|            |           |   |   |    |                   |
|------------|-----------|---|---|----|-------------------|
| rs12129883 | NP_563579 | I | L | IL | benign            |
| rs12129883 | NP_002829 | I | L | IL | benign            |
| rs12130128 | NP_079124 | L | V | LV | benign            |
| rs12130501 | XP_046751 | G | S | GS | benign            |
| rs12130792 | NP_056256 | Y | C | YC | probably damaging |
| rs12131549 | NP_077305 | F | L | FL | probably damaging |
| rs12131695 | XP_372763 | G | A | GA | benign            |
| rs12131800 | NP_000712 | A | T | AT | benign            |
| rs12132195 | XP_496362 | R | G | RG | possibly damaging |
| rs12132960 | XP_114152 | L | M | LM | benign            |
| rs12133454 | NP_002499 | F | L | FL | benign            |
| rs12133574 | NP_940948 | N | K | NK | possibly damaging |
| rs12134293 | NP_689873 | S | F | SF | possibly damaging |
| rs12134752 | NP_075565 | R | Q | RQ | benign            |
| rs12134870 | NP_001117 | L | F | LF | benign            |
| rs12134934 | NP_005798 | M | T | MT | benign            |
| rs12134979 | XP_372823 | F | L | FL | benign            |
| rs12135040 | XP_048104 | G | R | GR | probably damaging |
| rs12135069 | NP_060555 | R | G | RG | probably damaging |
| rs12135078 | XP_291438 | V | I | VI | benign            |
| rs12135160 | NP_000565 | S | F | SF | benign            |
| rs12135427 | NP_005637 | F | L | FL | benign            |
| rs12135684 | XP_060305 | A | S | AS | benign            |
| rs12136548 | NP_940861 | D | G | DG | benign            |
| rs12136585 | NP_002635 | S | P | SP | benign            |
| rs12136658 | NP_563578 | H | Q | HQ | benign            |
| rs12136658 | NP_563579 | H | Q | HQ | benign            |
| rs12136658 | NP_002829 | H | Q | HQ | benign            |
| rs12137505 | XP_371320 | N | D | ND | benign            |
| rs12137578 | NP_061174 | S | G | SG | benign            |
| rs12137678 | XP_371206 | R | Q | RQ | benign            |
| rs12137794 | NP_060668 | M | V | MV | benign            |
| rs12137982 | XP_060305 | T | S | TS | benign            |
| rs12138336 | NP_060606 | Q | H | QH | possibly damaging |
| rs12138368 | XP_371237 | L | F | LF | benign            |
| rs12139390 | XP_291438 | E | D | ED | benign            |
| rs12139527 | NP_000060 | L | S | LS | benign            |
| rs12139546 | NP_075390 | T | A | TA | benign            |
| rs12139550 | NP_075390 | E | G | EG | possibly damaging |
| rs12140153 | NP_005790 | G | V | GV | probably damaging |
| rs12140153 | NP_795352 | G | V | GV | probably damaging |
| rs12140153 | NP_795353 | G | V | GV | probably damaging |
| rs12140223 | NP_004061 | R | W | RW | benign            |
| rs12140311 | NP_000076 | T | S | TS | benign            |
| rs12140352 | NP_055964 | S | C | SC | possibly damaging |
| rs12141189 | NP_068777 | S | P | SP | benign            |

|            |           |   |   |    |                   |
|------------|-----------|---|---|----|-------------------|
| rs12141573 | NP_005790 | D | N | DN | benign            |
| rs12141573 | NP_795352 | D | N | DN | benign            |
| rs12141573 | NP_795353 | D | N | DN | benign            |
| rs12141598 | NP_005790 | E | K | EK | benign            |
| rs12141598 | NP_795352 | E | K | EK | benign            |
| rs12141598 | NP_795353 | E | K | EK | benign            |
| rs12141599 | NP_005790 | E | K | EK | benign            |
| rs12141599 | NP_795352 | E | K | EK | benign            |
| rs12141599 | NP_795353 | E | K | EK | benign            |
| rs12142270 | NP_055917 | T | M | TM | benign            |
| rs12142450 | XP_375851 | V | M | VM | benign            |
| rs12142488 | XP_291439 | L | M | LM | benign            |
| rs12142653 | NP_005332 | P | R | PR | probably damaging |
| rs12143301 | NP_065156 | A | G | AG | benign            |
| rs12143301 | NP_851607 | G | A | GA | benign            |
| rs12144752 | NP_004437 | S | F | SF | possibly damaging |
| rs12144935 | NP_940798 | S | N | SN | possibly damaging |
| rs12145360 | NP_689585 | I | T | IT | benign            |
| rs12145577 | NP_060156 | Q | P | QP | possibly damaging |
| rs12145706 | XP_372784 | A | T | AT | benign            |
| rs12145941 | XP_373868 | S | R | SR | benign            |
| rs12146448 | NP_055880 | V | F | VF | possibly damaging |
| rs12146487 | NP_000923 | R | H | RH | benign            |
| rs12146512 | NP_055880 | H | R | HR | probably damaging |
| rs12146610 | XP_370652 | Q | L | QL | probably damaging |
| rs12146709 | NP_115532 | K | R | KR | benign            |
| rs12146709 | NP_076414 | K | R | KR | benign            |
| rs12146727 | NP_958850 | R | H | RH | possibly damaging |
| rs12146813 | NP_149115 | Q | H | QH | benign            |
| rs12146878 | NP_996555 | R | W | RW | possibly damaging |
| rs12146878 | NP_996556 | R | W | RW | possibly damaging |
| rs12146878 | NP_002456 | R | W | RW | probably damaging |
| rs12146878 | NP_996557 | R | W | RW | probably damaging |
| rs12147890 | NP_002926 | G | R | GR | benign            |
| rs12148316 | NP_006284 | I | N | IN | benign            |
| rs12149651 | NP_074035 | L | M | LM | benign            |
| rs12149651 | NP_002465 | L | M | LM | benign            |
| rs12150220 | NP_127499 | L | H | LH | benign            |
| rs12150220 | NP_127500 | L | H | LH | possibly damaging |
| rs12150220 | NP_055737 | L | H | LH | possibly damaging |
| rs12150220 | NP_127497 | L | H | LH | possibly damaging |
| rs12150427 | NP_036484 | W | C | WC | benign            |
| rs12150510 | NP_009099 | Y | F | YF | possibly damaging |
| rs12150626 | XP_497555 | G | S | GS | benign            |
| rs12150682 | NP_852095 | A | V | AV | benign            |
| rs12150682 | NP_004505 | A | V | AV | benign            |

|            |           |   |   |    |                   |
|------------|-----------|---|---|----|-------------------|
| rs12150889 | NP_055085 | V | A | VA | benign            |
| rs12150963 | NP_115823 | N | K | NK | possibly damaging |
| rs12151009 | NP_036287 | M | V | MV | possibly damaging |
| rs12151060 | NP_112495 | D | Y | DY | benign            |
| rs12151069 | NP_002220 | A | S | AS | benign            |
| rs12153970 | NP_006111 | F | L | FL | probably damaging |
| rs12154540 | NP_699194 | E | G | EG | probably damaging |
| rs12154666 | XP_498198 | N | S | NS | benign            |
| rs12154756 | XP_498198 | N | K | NK | benign            |
| rs12154860 | XP_379797 | S | N | SN | benign            |
| rs12155155 | XP_379797 | L | S | LS | benign            |
| rs12155470 | XP_379797 | N | K | NK | benign            |
| rs12157473 | NP_003551 | S | I | SI | possibly damaging |
| rs12157650 | XP_496533 | G | R | GR | probably damaging |
| rs12157714 | NP_055392 | A | S | AS | benign            |
| rs12157816 | NP_660341 | Y | C | YC | benign            |
| rs12157922 | NP_683515 | A | V | AV | benign            |
| rs12158015 | NP_008863 | A | T | AT | benign            |
| rs12158015 | NP_599031 | A | T | AT | benign            |
| rs12158015 | NP_599032 | A | T | AT | benign            |
| rs12158456 | NP_061881 | P | L | PL | possibly damaging |
| rs12158709 | XP_376007 | R | K | RK | benign            |
| rs12158711 | XP_376007 | D | N | DN | benign            |
| rs12158840 | NP_003495 | V | M | VM | benign            |
| rs12159257 | NP_002963 | E | K | EK | benign            |
| rs12159292 | NP_036427 | D | N | DN | benign            |
| rs12159334 | NP_006349 | H | R | HR | possibly damaging |
| rs12159483 | NP_066554 | S | F | SF | benign            |
| rs12159591 | NP_073622 | D | N | DN | benign            |
| rs12159591 | NP_942153 | D | N | DN | benign            |
| rs12159765 | NP_038347 | Q | H | QH | possibly damaging |
| rs12160114 | XP_496527 | R | W | RW | possibly damaging |
| rs12160890 | XP_372891 | N | K | NK | benign            |
| rs12161775 | NP_004196 | T | S | TS | benign            |
| rs12163538 | NP_005769 | Q | H | QH | possibly damaging |
| rs12164038 | NP_056502 | V | G | VG | possibly damaging |
| rs12164380 | NP_060246 | V | L | VL | benign            |
| rs12164676 | XP_496691 | E | D | ED | benign            |
| rs12165943 | NP_055061 | C | S | CS | benign            |
| rs12166151 | NP_036427 | Q | E | QE | benign            |
| rs12166433 | NP_006595 | D | H | DH | benign            |
| rs12167166 | NP_002874 | Q | E | QE | benign            |
| rs12167828 | NP_057533 | N | S | NS | benign            |
| rs12168672 | NP_477352 | D | N | DN | benign            |
| rs12169391 | NP_055061 | T | M | TM | benign            |
| rs12169695 | NP_114408 | L | V | LV | benign            |

|            |           |   |   |    |                   |
|------------|-----------|---|---|----|-------------------|
| rs12170233 | NP_477352 | D | Y | DY | probably damaging |
| rs12170285 | NP_689825 | R | W | RW | possibly damaging |
| rs12170538 | XP_375963 | G | R | GR | possibly damaging |
| rs12170597 | NP_055061 | A | V | AV | benign            |
| rs12170847 | NP_055153 | L | M | LM | benign            |
| rs12170872 | NP_006730 | Q | H | QH | probably damaging |
| rs12170939 | NP_061830 | P | T | PT | possibly damaging |
| rs12171042 | XP_038520 | L | P | LP | probably damaging |
| rs12171319 | NP_055823 | R | P | RP | probably damaging |
| rs12171339 | XP_496691 | E | K | EK | benign            |
| rs12172245 | XP_372891 | H | Q | HQ | benign            |
| rs12172251 | XP_372891 | H | Q | HQ | benign            |
| rs12172393 | XP_372891 | S | N | SN | benign            |
| rs12172490 | XP_372891 | D | A | DA | benign            |
| rs12172761 | NP_803172 | A | T | AT | benign            |
| rs12172761 | NP_003617 | A | T | AT | benign            |
| rs12173786 | NP_065801 | K | N | KN | possibly damaging |
| rs12174042 | NP_523239 | E | K | EK | possibly damaging |
| rs12175072 | NP_003183 | A | T | AT | benign            |
| rs12175588 | XP_376527 | D | V | DV | possibly damaging |
| rs12176347 | NP_002109 | A | V | AV | benign            |
| rs12178306 | XP_496798 | A | V | AV | benign            |
| rs12178599 | NP_542165 | Y | N | YN | probably damaging |
| rs12180920 | XP_496798 | F | L | FL | benign            |
| rs12181587 | XP_496798 | T | A | TA | benign            |
| rs12182397 | NP_005518 | A | P | AP | probably damaging |
| rs12184494 | NP_057659 | A | E | AE | benign            |
| rs12185233 | NP_787078 | R | P | RP | possibly damaging |
| rs12185268 | NP_787078 | I | V | IV | benign            |
| rs12185498 | NP_066296 | S | L | SL | benign            |
| rs12185800 | NP_543024 | D | Y | DY | probably damaging |
| rs12186491 | NP_995313 | T | P | TP | possibly damaging |
| rs12187140 | NP_055201 | P | L | PL | probably damaging |
| rs12187913 | XP_087761 | C | S | CS | benign            |
| rs12188040 | NP_008948 | Q | K | QK | benign            |
| rs12188040 | NP_848511 | Q | K | QK | benign            |
| rs12188331 | XP_496740 | L | R | LR | benign            |
| rs12188395 | NP_060813 | N | S | NS | benign            |
| rs12190109 | NP_000829 | S | Y | SY | possibly damaging |
| rs12192054 | NP_002717 | L | V | LV | benign            |
| rs12192544 | NP_057677 | R | P | RP | benign            |
| rs12192712 | NP_006070 | H | R | HR | possibly damaging |
| rs12192877 | XP_371818 | T | K | TK | probably damaging |
| rs12193561 | NP_066983 | N | Y | NY | possibly damaging |
| rs12193711 | XP_371835 | S | F | SF | possibly damaging |
| rs12194205 | NP_003795 | V | A | VA | benign            |

|            |           |   |   |    |                   |
|------------|-----------|---|---|----|-------------------|
| rs12194408 | NP_057143 | C | S | CS | probably damaging |
| rs12194501 | NP_775947 | A | T | AT | benign            |
| rs12194643 | NP_775833 | A | T | AT | benign            |
| rs12194757 | NP_054880 | P | L | PL | probably damaging |
| rs12195603 | NP_056386 | R | P | RP | probably damaging |
| rs12195921 | NP_005115 | I | V | IV | benign            |
| rs12197062 | NP_085118 | T | P | TP | benign            |
| rs12197062 | NP_005346 | T | P | TP | benign            |
| rs12197079 | NP_775947 | T | M | TM | benign            |
| rs12197930 | NP_005579 | R | G | RG | possibly damaging |
| rs12198406 | XP_496798 | G | V | GV | benign            |
| rs12198781 | XP_294019 | Q | H | QH | benign            |
| rs12199003 | NP_997293 | R | C | RC | benign            |
| rs12199580 | NP_775947 | H | P | HP | benign            |
| rs12199734 | NP_758438 | H | R | HR | possibly damaging |
| rs12200929 | XP_291161 | K | R | KR | benign            |
| rs12200969 | NP_002033 | M | V | MV | possibly damaging |
| rs12201388 | NP_005091 | E | K | EK | benign            |
| rs12201388 | NP_653080 | E | K | EK | benign            |
| rs12204826 | NP_114130 | E | K | EK | benign            |
| rs12205138 | NP_005501 | A | V | AV | benign            |
| rs12205497 | NP_733758 | T | A | TA | benign            |
| rs12205497 | NP_001122 | T | A | TA | benign            |
| rs12205731 | NP_008978 | A | T | AT | benign            |
| rs12205837 | NP_079335 | A | V | AV | benign            |
| rs12207430 | NP_003634 | S | F | SF | benign            |
| rs12207437 | NP_003634 | S | F | SF | benign            |
| rs12207561 | XP_498116 | T | I | TI | probably damaging |
| rs12207840 | NP_060110 | P | L | PL | probably damaging |
| rs12207853 | NP_004146 | S | N | SN | benign            |
| rs12208357 | NP_694857 | R | C | RC | probably damaging |
| rs12208357 | NP_003048 | R | C | RC | probably damaging |
| rs12208559 | NP_115859 | P | R | PR | benign            |
| rs12209266 | NP_001714 | H | R | HR | possibly damaging |
| rs12209452 | NP_110447 | L | P | LP | benign            |
| rs12209636 | NP_938206 | S | N | SN | benign            |
| rs12209822 | NP_778227 | A | T | AT | benign            |
| rs12209851 | NP_002022 | R | K | RK | possibly damaging |
| rs12210538 | NP_149116 | M | T | MT | benign            |
| rs12210601 | NP_115896 | E | K | EK | benign            |
| rs12211410 | NP_061978 | R | H | RH | possibly damaging |
| rs12211658 | NP_071396 | F | S | FS | possibly damaging |
| rs12212092 | NP_439893 | R | H | RH | possibly damaging |
| rs12212092 | NP_006769 | R | H | RH | possibly damaging |
| rs12212199 | NP_003128 | R | K | RK | benign            |
| rs12212246 | NP_068812 | A | V | AV | benign            |

|            |           |   |   |    |                   |
|------------|-----------|---|---|----|-------------------|
| rs12213253 | NP_005882 | S | F | SF | benign            |
| rs12213435 | NP_149062 | D | Y | DY | probably damaging |
| rs12213435 | NP_892006 | D | Y | DY | probably damaging |
| rs12214183 | NP_006819 | E | K | EK | benign            |
| rs12214456 | NP_060838 | T | A | TA | benign            |
| rs12214686 | XP_371818 | R | G | RG | probably damaging |
| rs12217166 | XP_290463 | G | S | GS | benign            |
| rs12217419 | NP_110378 | G | R | GR | benign            |
| rs12217769 | XP_291697 | V | A | VA | benign            |
| rs12218134 | NP_065803 | V | M | VM | benign            |
| rs12218795 | NP_055793 | D | N | DN | benign            |
| rs12218864 | NP_055078 | H | Y | HY | benign            |
| rs12218864 | NP_647474 | H | Y | HY | benign            |
| rs12218864 | NP_647473 | H | Y | HY | benign            |
| rs12220646 | XP_498431 | Q | H | QH | possibly damaging |
| rs12221107 | NP_085128 | A | V | AV | benign            |
| rs12221615 | XP_166820 | L | V | LV | benign            |
| rs12221656 | XP_166777 | H | R | HR | benign            |
| rs12222256 | NP_892007 | V | M | VM | benign            |
| rs12222608 | NP_009097 | S | F | SF | benign            |
| rs12222632 | NP_079440 | R | K | RK | benign            |
| rs12223229 | XP_166203 | R | G | RG | possibly damaging |
| rs12223353 | XP_495863 | D | N | DN | benign            |
| rs12223986 | NP_005459 | K | T | KT | benign            |
| rs12224194 | NP_113680 | A | T | AT | benign            |
| rs12224576 | NP_060863 | S | Y | SY | possibly damaging |
| rs12225010 | XP_166256 | I | M | IM | benign            |
| rs12225035 | XP_115100 | M | K | MK | benign            |
| rs12225230 | NP_079440 | P | R | PR | benign            |
| rs12225892 | NP_002398 | E | K | EK | benign            |
| rs12226919 | NP_795370 | H | N | HN | possibly damaging |
| rs12226920 | NP_795370 | H | Q | HQ | benign            |
| rs12227879 | NP_060385 | V | M | VM | benign            |
| rs12228937 | NP_003797 | T | S | TS | benign            |
| rs12230214 | NP_002855 | L | V | LV | benign            |
| rs12231057 | NP_001978 | Q | H | QH | benign            |
| rs12231699 | XP_037557 | Q | H | QH | possibly damaging |
| rs12231744 | NP_079229 | K | R | KR | benign            |
| rs12231990 | NP_775813 | A | V | AV | benign            |
| rs12233719 | NP_001065 | A | S | AS | benign            |
| rs12234087 | NP_073739 | S | F | SF | benign            |
| rs12236219 | NP_919301 | R | C | RC | probably damaging |
| rs12237784 | XP_030729 | K | Q | KQ | benign            |
| rs12237784 | XP_497069 | K | Q | KQ | benign            |
| rs12238799 | XP_372110 | N | S | NS | benign            |
| rs12239037 | NP_444280 | G | R | GR | probably damaging |

|            |           |   |   |    |                   |
|------------|-----------|---|---|----|-------------------|
| rs12239356 | NP_005392 | V | F | VF | benign            |
| rs12240051 | NP_079455 | A | T | AT | benign            |
| rs12240233 | NP_055440 | L | P | LP | possibly damaging |
| rs12240677 | XP_166132 | A | G | AG | benign            |
| rs12241340 | NP_001299 | L | F | LF | benign            |
| rs12243537 | NP_997255 | R | C | RC | probably damaging |
| rs12243613 | XP_497218 | E | D | ED | benign            |
| rs12244154 | NP_775104 | S | C | SC | benign            |
| rs12247033 | NP_689964 | N | S | NS | benign            |
| rs12247034 | XP_372311 | I | V | IV | benign            |
| rs12247136 | NP_862823 | V | I | VI | benign            |
| rs12248579 | NP_006450 | R | M | RM | probably damaging |
| rs12248937 | NP_055704 | A | D | AD | benign            |
| rs12249258 | NP_006405 | S | R | SR | benign            |
| rs12249258 | NP_892117 | S | R | SR | benign            |
| rs12250107 | XP_372303 | A | P | AP | benign            |
| rs12251609 | NP_694579 | P | L | PL | benign            |
| rs12252659 | NP_065969 | N | H | NH | benign            |
| rs12253220 | NP_071896 | E | K | EK | benign            |
| rs12253554 | NP_694988 | A | V | AV | benign            |
| rs12254516 | XP_167709 | V | L | VL | benign            |
| rs12254856 | NP_065850 | S | N | SN | benign            |
| rs12254915 | NP_057318 | T | A | TA | benign            |
| rs12254915 | NP_976314 | T | A | TA | benign            |
| rs12256262 | NP_660153 | W | L | WL | possibly damaging |
| rs12256834 | NP_579899 | Y | F | YF | benign            |
| rs12256834 | NP_038479 | Y | F | YF | benign            |
| rs12257493 | NP_997255 | L | P | LP | possibly damaging |
| rs12257830 | NP_001100 | R | C | RC | benign            |
| rs12258692 | NP_067635 | R | P | RP | probably damaging |
| rs12259370 | NP_001072 | G | R | GR | probably damaging |
| rs12259382 | NP_071896 | T | S | TS | benign            |
| rs12259434 | XP_374765 | E | K | EK | benign            |
| rs12259677 | NP_932160 | P | T | PT | possibly damaging |
| rs12259677 | NP_932163 | P | T | PT | possibly damaging |
| rs12259677 | NP_932161 | P | T | PT | probably damaging |
| rs12259677 | NP_932162 | P | T | PT | probably damaging |
| rs12260094 | NP_000233 | N | Y | NY | probably damaging |
| rs12260663 | NP_066267 | S | T | ST | benign            |
| rs12260735 | XP_495808 | T | M | TM | benign            |
| rs12260996 | XP_290463 | V | L | VL | benign            |
| rs12261131 | NP_006195 | E | A | EA | benign            |
| rs12261793 | NP_001140 | I | V | IV | benign            |
| rs12262099 | NP_056428 | P | T | PT | possibly damaging |
| rs12262171 | NP_036361 | Q | R | QR | benign            |
| rs12262762 | XP_497218 | S | L | SL | benign            |



|            |           |   |   |    |                   |
|------------|-----------|---|---|----|-------------------|
| rs12262894 | NP_150598 | G | D | GD | benign            |
| rs12263572 | NP_005032 | V | M | VM | benign            |
| rs12264479 | XP_497218 | C | Y | CY | benign            |
| rs12265409 | XP_497249 | A | G | AG | benign            |
| rs12265848 | NP_060587 | R | H | RH | possibly damaging |
| rs12266692 | NP_963884 | T | A | TA | benign            |
| rs12267385 | NP_777550 | H | Y | HY | possibly damaging |
| rs12267912 | NP_056036 | E | D | ED | benign            |
| rs12268154 | NP_996744 | M | R | MR | benign            |
| rs12268154 | NP_996742 | M | R | MR | probably damaging |
| rs12268154 | NP_996743 | M | R | MR | probably damaging |
| rs12268154 | NP_008928 | M | R | MR | probably damaging |
| rs12268559 | NP_659460 | K | T | KT | benign            |
| rs12268608 | XP_374779 | L | F | LF | benign            |
| rs12268932 | NP_067075 | N | S | NS | benign            |
| rs12269953 | XP_372425 | G | D | GD | possibly damaging |
| rs12269953 | XP_372426 | G | D | GD | possibly damaging |
| rs12270001 | NP_899070 | K | E | KE | benign            |
| rs12270001 | NP_063947 | K | E | KE | benign            |
| rs12270203 | XP_291838 | F | S | FS | possibly damaging |
| rs12271558 | NP_004802 | P | T | PT | benign            |
| rs12271907 | NP_071452 | N | K | NK | benign            |
| rs12272017 | NP_116114 | R | H | RH | benign            |
| rs12272255 | NP_689644 | K | R | KR | benign            |
| rs12272403 | XP_166805 | Q | R | QR | benign            |
| rs12272419 | NP_112494 | T | A | TA | benign            |
| rs12273710 | NP_060729 | S | N | SN | benign            |
| rs12273892 | NP_620060 | L | Q | LQ | benign            |
| rs12273892 | NP_055895 | L | Q | LQ | benign            |
| rs12274095 | NP_620123 | P | T | PT | possibly damaging |
| rs12274730 | XP_062025 | K | E | KE | benign            |
| rs12274922 | NP_064614 | T | I | TI | benign            |
| rs12274923 | NP_058648 | A | V | AV | benign            |
| rs12275336 | NP_000251 | G | S | GS | benign            |
| rs12276180 | XP_497281 | V | G | VG | possibly damaging |
| rs12276475 | NP_002224 | P | T | PT | benign            |
| rs12276921 | NP_689644 | Q | R | QR | benign            |
| rs12278682 | XP_372401 | R | C | RC | probably damaging |
| rs12278968 | NP_000686 | W | L | WL | probably damaging |
| rs12279895 | XP_497297 | K | R | KR | possibly damaging |
| rs12280114 | XP_497297 | N | S | NS | probably damaging |
| rs12281163 | NP_003763 | V | L | VL | benign            |
| rs12281468 | NP_079374 | C | Y | CY | probably damaging |
| rs12282107 | NP_733746 | K | R | KR | benign            |
| rs12282627 | NP_005889 | Q | H | QH | possibly damaging |
| rs12282627 | NP_976240 | Q | H | QH | possibly damaging |

|            |           |   |   |    |                   |
|------------|-----------|---|---|----|-------------------|
| rs12282741 | NP_004168 | E | D | ED | benign            |
| rs12282811 | NP_002412 | R | S | RS | benign            |
| rs12283031 | NP_073609 | R | Q | RQ | benign            |
| rs12283300 | NP_689776 | A | S | AS | benign            |
| rs12283300 | NP_060642 | S | A | SA | benign            |
| rs12283346 | NP_060642 | P | R | PR | possibly damaging |
| rs12283346 | NP_689776 | R | P | RP | probably damaging |
| rs12283777 | XP_372418 | I | T | IT | benign            |
| rs12284316 | NP_003177 | N | S | NS | possibly damaging |
| rs12284429 | XP_495863 | L | P | LP | possibly damaging |
| rs12284579 | NP_060960 | A | V | AV | benign            |
| rs12284790 | XP_497297 | R | C | RC | possibly damaging |
| rs12284792 | XP_497281 | E | A | EA | benign            |
| rs12285035 | NP_057080 | T | M | TM | benign            |
| rs12286721 | NP_079059 | M | I | MI | benign            |
| rs12286850 | NP_055159 | R | H | RH | benign            |
| rs12287555 | NP_620714 | L | V | LV | benign            |
| rs12288690 | XP_166868 | A | T | AT | benign            |
| rs12288849 | NP_443164 | A | T | AT | benign            |
| rs12289253 | NP_116169 | Q | R | QR | benign            |
| rs12289420 | XP_208554 | E | K | EK | benign            |
| rs12289558 | NP_937828 | T | A | TA | benign            |
| rs12291002 | NP_006319 | Y | C | YC | probably damaging |
| rs12291017 | NP_473372 | R | C | RC | possibly damaging |
| rs12291445 | XP_374912 | K | E | KE | benign            |
| rs12291577 | XP_089866 | S | N | SN | benign            |
| rs12291617 | XP_166825 | V | I | VI | benign            |
| rs12291622 | XP_291947 | R | C | RC | possibly damaging |
| rs12292056 | XP_497275 | T | N | TN | possibly damaging |
| rs12292126 | NP_000686 | W | G | WG | probably damaging |
| rs12292394 | NP_056076 | R | Q | RQ | benign            |
| rs12293826 | XP_290517 | V | I | VI | benign            |
| rs12295161 | NP_005447 | R | Q | RQ | probably damaging |
| rs12295719 | NP_002418 | D | H | DH | benign            |
| rs12296548 | NP_056932 | E | K | EK | probably damaging |
| rs12297756 | NP_005370 | C | S | CS | benign            |
| rs12298022 | NP_079229 | L | I | LI | benign            |
| rs12298275 | NP_078827 | Q | R | QR | benign            |
| rs12298348 | NP_775109 | R | H | RH | benign            |
| rs12298510 | NP_064693 | R | K | RK | benign            |
| rs12298510 | NP_064694 | R | K | RK | benign            |
| rs12298510 | NP_005682 | R | K | RK | benign            |
| rs12299012 | NP_062818 | V | A | VA | benign            |
| rs12299908 | NP_115506 | E | Q | EQ | benign            |
| rs12301587 | XP_044062 | F | I | FI | benign            |
| rs12302417 | XP_372471 | A | V | AV | benign            |

|            |           |   |   |    |                   |
|------------|-----------|---|---|----|-------------------|
| rs12303066 | XP_497345 | R | C | RC | possibly damaging |
| rs12303478 | NP_689535 | G | S | GS | possibly damaging |
| rs12303732 | NP_055318 | L | W | LW | possibly damaging |
| rs12303775 | NP_003658 | H | R | HR | probably damaging |
| rs12305038 | NP_000912 | N | D | ND | benign            |
| rs12305753 | XP_370696 | S | F | SF | possibly damaging |
| rs12306130 | NP_003836 | A | T | AT | benign            |
| rs12307919 | NP_036372 | R | C | RC | probably damaging |
| rs12308297 | NP_055879 | Q | H | QH | possibly damaging |
| rs12308297 | NP_829881 | Q | H | QH | possibly damaging |
| rs12308297 | NP_829882 | Q | H | QH | possibly damaging |
| rs12308297 | NP_829883 | Q | H | QH | possibly damaging |
| rs12308297 | NP_829884 | Q | H | QH | possibly damaging |
| rs12308865 | NP_038459 | P | H | PH | probably damaging |
| rs12309295 | XP_495917 | L | V | LV | benign            |
| rs12311351 | NP_061857 | V | I | VI | benign            |
| rs12312471 | XP_372447 | S | R | SR | possibly damaging |
| rs12313520 | XP_497335 | L | M | LM | benign            |
| rs12313670 | NP_005077 | S | N | SN | benign            |
| rs12313736 | NP_005077 | V | I | VI | benign            |
| rs12314553 | NP_776173 | V | I | VI | benign            |
| rs12315800 | XP_372471 | F | L | FL | benign            |
| rs12315898 | NP_075067 | S | N | SN | benign            |
| rs12317430 | NP_000280 | S | F | SF | possibly damaging |
| rs12317722 | NP_945343 | S | I | SI | benign            |
| rs12318612 | NP_795366 | P | R | PR | possibly damaging |
| rs12318746 | NP_002196 | R | I | RI | probably damaging |
| rs12318785 | NP_004849 | I | V | IV | benign            |
| rs12318802 | XP_495908 | A | T | AT | benign            |
| rs12319376 | NP_829883 | T | A | TA | benign            |
| rs12319376 | NP_829884 | T | A | TA | benign            |
| rs12319476 | NP_060034 | E | K | EK | benign            |
| rs12320176 | NP_001973 | N | S | NS | benign            |
| rs12321185 | XP_292109 | A | E | AE | benign            |
| rs12321831 | NP_006602 | R | C | RC | benign            |
| rs12321909 | XP_292093 | K | E | KE | benign            |
| rs12322122 | NP_085911 | H | Y | HY | possibly damaging |
| rs12322444 | NP_710154 | Q | H | QH | possibly damaging |
| rs12323601 | XP_290629 | A | V | AV | benign            |
| rs12323939 | NP_857593 | T | R | TR | benign            |
| rs12323939 | NP_003701 | T | R | TR | benign            |
| rs12324002 | NP_000129 | I | T | IT | benign            |
| rs12324924 | NP_003861 | S | A | SA | benign            |
| rs12325439 | NP_071449 | P | A | PA | benign            |
| rs12326301 | XP_029429 | R | C | RC | possibly damaging |
| rs12327568 | XP_496306 | K | R | KR | benign            |

|            |           |   |   |    |                   |
|------------|-----------|---|---|----|-------------------|
| rs12327617 | XP_375569 | E | G | EG | possibly damaging |
| rs12327801 | XP_375558 | S | T | ST | benign            |
| rs12328094 | NP_057336 | L | F | LF | benign            |
| rs12329487 | NP_036202 | V | I | VI | benign            |
| rs12329487 | NP_647538 | V | I | VI | benign            |
| rs12329487 | NP_647537 | V | I | VI | benign            |
| rs12329760 | NP_005647 | M | V | MV | benign            |
| rs12329790 | NP_000062 | I | T | IT | probably damaging |
| rs12330040 | XP_496525 | A | P | AP | possibly damaging |
| rs12330063 | NP_612444 | R | S | RS | benign            |
| rs12331141 | NP_872308 | V | I | VI | benign            |
| rs12331994 | NP_689753 | H | L | HL | probably damaging |
| rs12332369 | NP_079143 | E | G | EG | benign            |
| rs12332640 | NP_001198 | A | T | AT | benign            |
| rs12332798 | NP_115900 | P | R | PR | probably damaging |
| rs12335014 | NP_443169 | I | N | IN | benign            |
| rs12335650 | XP_372110 | G | D | GD | possibly damaging |
| rs12336109 | XP_088459 | L | I | LI | benign            |
| rs12336575 | NP_006639 | Q | H | QH | benign            |
| rs12336965 | NP_892019 | A | E | AE | probably damaging |
| rs12337034 | NP_659401 | V | A | VA | benign            |
| rs12337130 | NP_071738 | G | D | GD | possibly damaging |
| rs12337164 | XP_498308 | K | R | KR | possibly damaging |
| rs12337286 | XP_035953 | N | D | ND | benign            |
| rs12337910 | NP_997394 | K | E | KE | benign            |
| rs12338411 | XP_499140 | K | N | KN | benign            |
| rs12339171 | NP_079515 | S | T | ST | benign            |
| rs12339210 | NP_056219 | P | A | PA | possibly damaging |
| rs12339470 | XP_372125 | D | E | DE | benign            |
| rs12339582 | NP_006368 | E | D | ED | benign            |
| rs12339753 | XP_497020 | L | V | LV | benign            |
| rs12340616 | NP_937823 | L | H | LH | possibly damaging |
| rs12341266 | NP_652760 | C | Y | CY | probably damaging |
| rs12341325 | XP_497051 | F | L | FL | benign            |
| rs12341435 | NP_671728 | E | D | ED | benign            |
| rs12341576 | XP_035953 | I | T | IT | benign            |
| rs12342214 | NP_079104 | V | M | VM | benign            |
| rs12342367 | NP_116232 | A | V | AV | benign            |
| rs12342958 | NP_060857 | A | V | AV | benign            |
| rs12344006 | NP_055861 | K | N | KN | benign            |
| rs12344570 | NP_008912 | S | G | SG | benign            |
| rs12344570 | NP_775290 | S | G | SG | benign            |
| rs12344570 | NP_775291 | S | G | SG | benign            |
| rs12344570 | NP_775292 | S | G | SG | benign            |
| rs12345231 | XP_294521 | H | R | HR | benign            |
| rs12346677 | NP_004226 | P | L | PL | probably damaging |

|            |           |   |   |    |                   |
|------------|-----------|---|---|----|-------------------|
| rs12348638 | XP_372125 | R | G | RG | probably damaging |
| rs12349422 | XP_054983 | D | N | DN | benign            |
| rs12349568 | NP_671728 | A | S | AS | benign            |
| rs12350212 | NP_919301 | Q | H | QH | probably damaging |
| rs12350674 | XP_497078 | N | K | NK | benign            |
| rs12350787 | NP_006639 | Q | P | QP | benign            |
| rs12350913 | NP_068836 | L | P | LP | possibly damaging |
| rs12351796 | XP_041018 | D | G | DG | possibly damaging |
| rs12352254 | NP_598004 | L | V | LV | benign            |
| rs12352313 | NP_694856 | N | S | NS | benign            |
| rs12352552 | XP_373322 | H | Y | HY | benign            |
| rs12352982 | NP_055861 | P | L | PL | benign            |
| rs12353144 | XP_372110 | N | S | NS | benign            |
| rs12353152 | NP_954714 | R | S | RS | benign            |
| rs12353275 | XP_372133 | E | D | ED | benign            |
| rs12353306 | XP_372133 | E | K | EK | benign            |
| rs12353307 | NP_037522 | A | V | AV | benign            |
| rs12354200 | NP_003272 | A | T | AT | benign            |
| rs12354808 | XP_290463 | S | T | ST | benign            |
| rs12354886 | NP_660355 | A | T | AT | benign            |
| rs12355309 | NP_079511 | V | I | VI | benign            |
| rs12356107 | XP_290463 | P | R | PR | probably damaging |
| rs12356978 | NP_060079 | E | K | EK | benign            |
| rs12357325 | NP_001140 | A | S | AS | benign            |
| rs12357783 | NP_001600 | E | G | EG | possibly damaging |
| rs12359281 | XP_374779 | I | V | IV | benign            |
| rs12360068 | NP_071757 | A | V | AV | benign            |
| rs12360326 | NP_057712 | L | F | LF | benign            |
| rs12360326 | NP_567822 | L | F | LF | benign            |
| rs12360326 | NP_567823 | L | F | LF | benign            |
| rs12360738 | XP_497266 | V | I | VI | benign            |
| rs12360861 | NP_006716 | A | T | AT | benign            |
| rs12360890 | XP_372394 | S | G | SG | benign            |
| rs12361947 | NP_659452 | R | K | RK | benign            |
| rs12361955 | XP_061624 | L | F | LF | benign            |
| rs12362209 | NP_775827 | T | A | TA | benign            |
| rs12362443 | NP_061182 | A | V | AV | benign            |
| rs12362779 | NP_689408 | A | V | AV | benign            |
| rs12363178 | XP_372361 | W | G | WG | possibly damaging |
| rs12363627 | XP_166777 | S | L | SL | possibly damaging |
| rs12363823 | XP_497270 | A | T | AT | benign            |
| rs12363829 | XP_166872 | R | K | RK | benign            |
| rs12364099 | XP_372434 | T | N | TN | benign            |
| rs12364102 | XP_166856 | M | I | MI | benign            |
| rs12364710 | NP_003360 | L | V | LV | benign            |
| rs12364852 | NP_542385 | H | N | HN | possibly damaging |

|            |           |   |   |    |                   |
|------------|-----------|---|---|----|-------------------|
| rs12365487 | XP_372364 | T | N | TN | possibly damaging |
| rs12365708 | NP_004914 | C | R | CR | probably damaging |
| rs12366219 | XP_166777 | M | V | MV | benign            |
| rs12366447 | NP_065813 | A | T | AT | benign            |
| rs12366644 | NP_068593 | G | R | GR | possibly damaging |
| rs12366671 | NP_006413 | I | T | IT | benign            |
| rs12367362 | NP_036423 | L | M | LM | benign            |
| rs12367528 | NP_003202 | P | H | PH | possibly damaging |
| rs12367772 | XP_497336 | L | P | LP | possibly damaging |
| rs12368048 | NP_872414 | T | N | TN | benign            |
| rs12368261 | NP_002226 | S | Y | SY | probably damaging |
| rs12368599 | NP_003970 | T | A | TA | benign            |
| rs12368787 | NP_872302 | V | F | VF | possibly damaging |
| rs12369620 | NP_938083 | S | I | SI | probably damaging |
| rs12369931 | NP_079085 | D | H | DH | possibly damaging |
| rs12369946 | NP_002323 | V | M | VM | benign            |
| rs12371126 | NP_055718 | S | F | SF | benign            |
| rs12371196 | NP_659410 | E | D | ED | benign            |
| rs12371434 | NP_689804 | L | S | LS | benign            |
| rs12371985 | XP_208658 | G | E | GE | possibly damaging |
| rs12373018 | NP_057376 | D | E | DE | benign            |
| rs12373105 | NP_150229 | F | L | FL | benign            |
| rs12373123 | NP_787078 | S | P | SP | benign            |
| rs12373139 | NP_787078 | G | R | GR | benign            |
| rs12373142 | NP_787078 | P | R | PR | benign            |
| rs12373540 | NP_848639 | L | F | LF | benign            |
| rs12374616 | NP_660358 | A | T | AT | benign            |
| rs12375120 | XP_371925 | R | C | RC | benign            |
| rs12375120 | NP_775808 | R | C | RC | benign            |
| rs12375759 | XP_088459 | A | S | AS | benign            |
| rs12375774 | XP_498338 | T | S | TS | benign            |
| rs12375815 | NP_001726 | V | I | VI | benign            |
| rs12375931 | XP_498338 | I | V | IV | benign            |
| rs12375945 | XP_372110 | S | R | SR | benign            |
| rs12377346 | NP_000709 | E | K | EK | benign            |
| rs12377939 | XP_372092 | D | N | DN | benign            |
| rs12377939 | XP_497031 | D | N | DN | benign            |
| rs12378280 | NP_055433 | Q | H | QH | possibly damaging |
| rs12378799 | XP_497012 | R | C | RC | probably damaging |
| rs12379789 | XP_378080 | R | T | RT | benign            |
| rs12380064 | XP_071099 | S | T | ST | benign            |
| rs12380858 | XP_497079 | A | V | AV | benign            |
| rs12385494 | XP_377053 | E | G | EG | possibly damaging |
| rs12385818 | NP_006829 | K | E | KE | benign            |
| rs12385864 | XP_372494 | T | M | TM | benign            |
| rs12386087 | XP_371111 | N | K | NK | benign            |

|            |           |   |   |    |                   |
|------------|-----------|---|---|----|-------------------|
| rs12386117 | NP_056025 | G | S | GS | benign            |
| rs12387194 | NP_005360 | Q | K | QK | benign            |
| rs12388502 | NP_003060 | E | Q | EQ | benign            |
| rs12388502 | NP_620604 | E | Q | EQ | benign            |
| rs12388557 | XP_066690 | R | W | RW | probably damaging |
| rs12388875 | NP_001640 | S | W | SW | possibly damaging |
| rs12390168 | XP_291322 | A | S | AS | benign            |
| rs12392549 | NP_000160 | I | S | IS | benign            |
| rs12393480 | NP_001546 | S | N | SN | benign            |
| rs12394468 | NP_076987 | R | L | RL | probably damaging |
| rs12395634 | NP_001447 | A | V | AV | possibly damaging |
| rs12396910 | NP_056234 | T | A | TA | benign            |
| rs12401376 | XP_086604 | G | E | GE | benign            |
| rs12401421 | NP_064601 | H | P | HP | probably damaging |
| rs12401572 | NP_002370 | K | I | KI | probably damaging |
| rs12401867 | NP_658912 | K | R | KR | benign            |
| rs12402493 | NP_112180 | I | F | IF | benign            |
| rs12402606 | NP_065948 | R | M | RM | possibly damaging |
| rs12402973 | NP_997303 | R | Q | RQ | benign            |
| rs12403174 | NP_003027 | S | C | SC | possibly damaging |
| rs12403246 | NP_060686 | R | W | RW | benign            |
| rs12403266 | NP_006104 | Q | H | QH | benign            |
| rs12403630 | NP_671517 | R | H | RH | benign            |
| rs12403630 | NP_056362 | R | H | RH | benign            |
| rs12403726 | NP_064601 | A | V | AV | benign            |
| rs12404749 | NP_003751 | R | K | RK | benign            |
| rs12404909 | NP_060768 | T | P | TP | probably damaging |
| rs12405241 | XP_048104 | A | V | AV | benign            |
| rs12405278 | XP_048104 | R | C | RC | benign            |
| rs12405650 | XP_496357 | V | I | VI | benign            |
| rs12406225 | NP_751896 | E | G | EG | possibly damaging |
| rs12406225 | NP_002473 | E | G | EG | possibly damaging |
| rs12406460 | NP_006173 | G | R | GR | benign            |
| rs12406479 | NP_000060 | A | G | AG | benign            |
| rs12406724 | NP_078801 | P | L | PL | possibly damaging |
| rs12406753 | NP_002499 | T | P | TP | benign            |
| rs12407578 | NP_056193 | S | L | SL | benign            |
| rs12407748 | XP_048104 | R | Q | RQ | benign            |
| rs12407807 | XP_048104 | R | H | RH | probably damaging |
| rs12407929 | NP_075558 | G | R | GR | possibly damaging |
| rs12409352 | NP_660150 | F | L | FL | benign            |
| rs12409430 | NP_006305 | P | L | PL | benign            |
| rs12409951 | NP_085152 | E | Q | EQ | benign            |
| rs12410563 | NP_056261 | L | V | LV | benign            |
| rs12410676 | NP_006104 | P | S | PS | probably damaging |
| rs12410711 | NP_000428 | G | S | GS | possibly damaging |

|            |           |   |   |    |                   |
|------------|-----------|---|---|----|-------------------|
| rs12411033 | XP_496355 | A | V | AV | benign            |
| rs12411176 | NP_004969 | C | Y | CY | benign            |
| rs12411176 | NP_720198 | C | Y | CY | benign            |
| rs12411292 | XP_290463 | E | K | EK | benign            |
| rs12411979 | XP_290462 | A | V | AV | benign            |
| rs12412136 | NP_003963 | A | V | AV | benign            |
| rs12412320 | XP_061055 | D | E | DE | benign            |
| rs12412617 | NP_055568 | R | H | RH | possibly damaging |
| rs12412738 | NP_065803 | E | Q | EQ | benign            |
| rs12413253 | XP_051081 | I | M | IM | benign            |
| rs12413389 | NP_004410 | A | S | AS | benign            |
| rs12413968 | NP_057279 | R | C | RC | benign            |
| rs12414460 | NP_000762 | R | Q | RQ | probably damaging |
| rs12415264 | NP_689923 | P | L | PL | possibly damaging |
| rs12417164 | XP_061624 | I | N | IN | possibly damaging |
| rs12417903 | NP_003728 | A | G | AG | benign            |
| rs12417980 | NP_065091 | G | R | GR | benign            |
| rs12418097 | NP_000471 | R | G | RG | possibly damaging |
| rs12419103 | NP_612465 | G | S | GS | benign            |
| rs12419308 | NP_056346 | S | N | SN | benign            |
| rs12419343 | NP_066025 | V | G | VG | probably damaging |
| rs12419616 | NP_659477 | A | P | AP | benign            |
| rs12419635 | NP_996776 | P | L | PL | benign            |
| rs12420076 | XP_372403 | K | Q | KQ | benign            |
| rs12420456 | XP_495880 | A | V | AV | benign            |
| rs12420738 | XP_166914 | R | L | RL | possibly damaging |
| rs12420809 | XP_497279 | E | K | EK | benign            |
| rs12421330 | XP_372403 | G | C | GC | benign            |
| rs12421620 | NP_005691 | E | K | EK | benign            |
| rs12422096 | XP_290540 | H | Q | HQ | possibly damaging |
| rs12422129 | XP_372436 | T | I | TI | possibly damaging |
| rs12422129 | XP_166777 | T | I | TI | possibly damaging |
| rs12422149 | NP_009187 | R | Q | RQ | benign            |
| rs12422501 | NP_037452 | E | K | EK | benign            |
| rs12422983 | NP_006096 | G | S | GS | benign            |
| rs12423058 | NP_689853 | N | D | ND | benign            |
| rs12423276 | NP_036538 | V | I | VI | benign            |
| rs12423651 | NP_612642 | P | L | PL | probably damaging |
| rs12423862 | XP_058513 | P | L | PL | probably damaging |
| rs12424159 | XP_044062 | G | R | GR | possibly damaging |
| rs12424373 | NP_795369 | K | Q | KQ | benign            |
| rs12424429 | NP_877499 | A | V | AV | benign            |
| rs12424437 | NP_055680 | R | H | RH | possibly damaging |
| rs12425042 | NP_775813 | R | C | RC | possibly damaging |
| rs12425460 | XP_292136 | R | C | RC | benign            |
| rs12425518 | XP_292136 | A | T | AT | benign            |



|            |           |   |   |    |                   |
|------------|-----------|---|---|----|-------------------|
| rs12425701 | XP_495908 | E | K | EK | benign            |
| rs12425728 | NP_000005 | R | Q | RQ | possibly damaging |
| rs12425852 | NP_115885 | S | A | SA | benign            |
| rs12426596 | XP_044062 | T | S | TS | benign            |
| rs12427129 | NP_055027 | A | V | AV | benign            |
| rs12427696 | NP_002001 | I | V | IV | benign            |
| rs12428067 | NP_115812 | P | R | PR | probably damaging |
| rs12428644 | NP_009118 | A | V | AV | benign            |
| rs12429125 | XP_495949 | P | R | PR | probably damaging |
| rs12429632 | NP_055749 | K | E | KE | benign            |
| rs12429632 | NP_945319 | K | E | KE | benign            |
| rs12433837 | XP_290629 | V | I | VI | benign            |
| rs12433841 | XP_290629 | R | H | RH | benign            |
| rs12434716 | NP_071406 | A | P | AP | benign            |
| rs12434716 | NP_775182 | A | P | AP | benign            |
| rs12434757 | NP_689805 | V | A | VA | benign            |
| rs12434929 | NP_079108 | G | A | GA | benign            |
| rs12436892 | NP_054888 | A | V | AV | benign            |
| rs12437266 | NP_612204 | P | S | PS | probably damaging |
| rs12437434 | XP_370756 | T | M | TM | benign            |
| rs12437941 | XP_085234 | G | S | GS | benign            |
| rs12438969 | XP_496032 | V | L | VL | benign            |
| rs12439065 | NP_079093 | D | N | DN | benign            |
| rs12440118 | NP_071918 | W | R | WR | probably damaging |
| rs12440300 | XP_290631 | M | V | MV | benign            |
| rs12440560 | NP_775880 | T | I | TI | benign            |
| rs12441101 | NP_061159 | H | R | HR | possibly damaging |
| rs12441468 | XP_496032 | L | I | LI | benign            |
| rs12441978 | XP_034904 | E | K | EK | benign            |
| rs12442525 | NP_057726 | Q | E | QE | benign            |
| rs12442757 | NP_066013 | N | S | NS | benign            |
| rs12442879 | NP_996923 | G | S | GS | benign            |
| rs12442879 | NP_996920 | G | S | GS | benign            |
| rs12442879 | NP_996921 | G | S | GS | benign            |
| rs12445220 | NP_003447 | A | D | AD | benign            |
| rs12445920 | XP_372607 | R | Q | RQ | benign            |
| rs12446946 | NP_002696 | E | Q | EQ | benign            |
| rs12447370 | NP_065815 | P | L | PL | probably damaging |
| rs12447441 | NP_000284 | N | T | NT | benign            |
| rs12447755 | NP_954651 | K | R | KR | benign            |
| rs12448103 | XP_085463 | L | P | LP | possibly damaging |
| rs12448192 | XP_290684 | T | A | TA | benign            |
| rs12448210 | NP_775747 | V | L | VL | benign            |
| rs12449313 | NP_658988 | N | S | NS | benign            |
| rs12449332 | NP_002936 | S | F | SF | possibly damaging |
| rs12449580 | NP_055151 | D | H | DH | possibly damaging |

|            |           |   |   |    |                   |
|------------|-----------|---|---|----|-------------------|
| rs12449695 | NP_940903 | T | A | TA | benign            |
| rs12449858 | NP_009198 | F | L | FL | benign            |
| rs12450091 | NP_061000 | E | G | EG | possibly damaging |
| rs12450314 | NP_005984 | F | L | FL | benign            |
| rs12450550 | NP_689676 | I | T | IT | benign            |
| rs12450621 | NP_002270 | E | K | EK | possibly damaging |
| rs12451299 | NP_071450 | T | R | TR | benign            |
| rs12451652 | NP_002271 | C | Y | CY | probably damaging |
| rs12451679 | XP_496206 | S | L | SL | benign            |
| rs12452520 | NP_001356 | G | S | GS | possibly damaging |
| rs12453124 | NP_853515 | K | E | KE | possibly damaging |
| rs12453150 | NP_689483 | F | V | FV | benign            |
| rs12453250 | NP_653208 | F | L | FL | possibly damaging |
| rs12453843 | NP_853515 | G | V | GV | possibly damaging |
| rs12454500 | XP_496269 | M | I | MI | benign            |
| rs12455750 | NP_776216 | W | G | WG | probably damaging |
| rs12455750 | NP_006776 | W | G | WG | probably damaging |
| rs12456560 | NP_006092 | E | D | ED | benign            |
| rs12457323 | NP_937762 | V | A | VA | benign            |
| rs12458669 | NP_064565 | G | S | GS | benign            |
| rs12459008 | XP_064856 | I | N | IN | probably damaging |
| rs12459084 | XP_050564 | G | R | GR | possibly damaging |
| rs12459238 | NP_659483 | V | I | VI | benign            |
| rs12459317 | XP_496286 | I | T | IT | probably damaging |
| rs12459398 | NP_114147 | V | M | VM | benign            |
| rs12459404 | NP_002686 | F | S | FS | benign            |
| rs12459416 | NP_055699 | L | I | LI | benign            |
| rs12459500 | XP_377527 | R | Q | RQ | benign            |
| rs12459836 | NP_005295 | M | V | MV | benign            |
| rs12459836 | NP_005296 | M | V | MV | benign            |
| rs12459877 | NP_001396 | S | Y | SY | possibly damaging |
| rs12459916 | NP_110412 | A | V | AV | benign            |
| rs12460007 | NP_940880 | H | Q | HQ | possibly damaging |
| rs12460170 | NP_079009 | A | V | AV | benign            |
| rs12460371 | NP_848639 | E | G | EG | benign            |
| rs12460394 | NP_065955 | R | Q | RQ | benign            |
| rs12460416 | XP_371195 | E | Q | EQ | benign            |
| rs12460449 | NP_113605 | E | Q | EQ | possibly damaging |
| rs12460501 | NP_006660 | A | T | AT | benign            |
| rs12460590 | NP_085079 | V | G | VG | benign            |
| rs12460590 | NP_000755 | V | G | VG | benign            |
| rs12460628 | XP_064903 | I | F | IF | benign            |
| rs12460779 | XP_290822 | A | T | AT | benign            |
| rs12460873 | NP_077274 | P | S | PS | probably damaging |
| rs12460932 | NP_201574 | E | D | ED | benign            |
| rs12460961 | NP_689818 | R | Q | RQ | benign            |

|            |           |   |   |    |                   |
|------------|-----------|---|---|----|-------------------|
| rs12460962 | XP_371195 | A | V | AV | benign            |
| rs12461139 | NP_059128 | Q | H | QH | benign            |
| rs12461347 | NP_112163 | G | S | GS | benign            |
| rs12461709 | NP_620168 | H | P | HP | probably damaging |
| rs12462372 | NP_604393 | R | H | RH | benign            |
| rs12462687 | NP_060730 | L | V | LV | benign            |
| rs12462918 | NP_085079 | N | Y | NY | benign            |
| rs12462918 | NP_000755 | N | Y | NY | benign            |
| rs12462929 | XP_030958 | H | R | HR | benign            |
| rs12462966 | XP_375634 | R | W | RW | benign            |
| rs12462974 | XP_371146 | T | A | TA | benign            |
| rs12463034 | XP_375634 | G | E | GE | benign            |
| rs12463036 | XP_375634 | E | Q | EQ | benign            |
| rs12463121 | NP_663299 | V | G | VG | probably damaging |
| rs12464423 | NP_056465 | K | N | KN | benign            |
| rs12466181 | NP_066918 | S | I | SI | possibly damaging |
| rs12466309 | NP_073153 | T | A | TA | benign            |
| rs12466551 | XP_043492 | N | S | NS | benign            |
| rs12467132 | NP_003133 | A | D | AD | possibly damaging |
| rs12467443 | XP_497871 | V | M | VM | benign            |
| rs12468485 | NP_005292 | T | M | TM | benign            |
| rs12469459 | NP_071417 | L | M | LM | benign            |
| rs12469825 | NP_689742 | T | A | TA | benign            |
| rs12470652 | NP_000224 | N | S | NS | benign            |
| rs12470774 | NP_071451 | L | I | LI | benign            |
| rs12471868 | NP_872357 | I | V | IV | benign            |
| rs12471954 | XP_086937 | I | T | IT | benign            |
| rs12472091 | NP_036587 | S | P | SP | benign            |
| rs12472441 | XP_496593 | P | L | PL | possibly damaging |
| rs12474273 | NP_008853 | V | A | VA | benign            |
| rs12474918 | NP_071451 | T | S | TS | benign            |
| rs12475068 | NP_061951 | A | G | AG | benign            |
| rs12476147 | NP_919226 | Q | L | QL | possibly damaging |
| rs12476171 | NP_004845 | Y | N | YN | probably damaging |
| rs12476284 | NP_060259 | E | V | EV | possibly damaging |
| rs12476289 | NP_596870 | R | Q | RQ | benign            |
| rs12477430 | NP_919226 | H | R | HR | benign            |
| rs12477907 | XP_380174 | A | T | AT | benign            |
| rs12477907 | NP_945349 | A | T | AT | benign            |
| rs12478227 | XP_293026 | R | C | RC | probably damaging |
| rs12478318 | NP_002968 | M | L | ML | benign            |
| rs12479154 | NP_002184 | E | Q | EQ | benign            |
| rs12479499 | NP_847901 | H | P | HP | probably damaging |
| rs12479499 | NP_847902 | H | P | HP | probably damaging |
| rs12479499 | NP_001492 | H | P | HP | probably damaging |
| rs12479563 | XP_114156 | R | C | RC | possibly damaging |

|            |           |   |   |    |                   |
|------------|-----------|---|---|----|-------------------|
| rs12479626 | NP_775114 | H | R | HR | possibly damaging |
| rs12479696 | NP_079496 | P | L | PL | possibly damaging |
| rs12479696 | NP_694882 | P | L | PL | probably damaging |
| rs12479813 | NP_004578 | R | L | RL | possibly damaging |
| rs12480603 | NP_057518 | E | D | ED | benign            |
| rs12480603 | NP_116575 | E | D | ED | benign            |
| rs12481055 | XP_372866 | K | Q | KQ | benign            |
| rs12481082 | NP_004509 | S | L | SL | benign            |
| rs12481082 | NP_742104 | S | L | SL | benign            |
| rs12481082 | NP_742106 | S | L | SL | benign            |
| rs12481082 | NP_742105 | S | L | SL | benign            |
| rs12481228 | NP_690908 | P | R | PR | benign            |
| rs12481791 | NP_006022 | A | V | AV | benign            |
| rs12481809 | NP_859012 | V | I | VI | benign            |
| rs12482626 | NP_065690 | S | N | SN | benign            |
| rs12483104 | NP_001380 | D | Y | DY | probably damaging |
| rs12483134 | NP_000821 | E | K | EK | benign            |
| rs12483134 | NP_783300 | E | K | EK | benign            |
| rs12483584 | NP_981950 | P | T | PT | possibly damaging |
| rs12483730 | NP_859012 | A | V | AV | benign            |
| rs12484461 | XP_371430 | S | F | SF | possibly damaging |
| rs12484657 | NP_060399 | L | V | LV | benign            |
| rs12484684 | NP_055154 | P | Q | PQ | possibly damaging |
| rs12484731 | NP_067585 | D | E | DE | benign            |
| rs12484731 | NP_004318 | D | E | DE | benign            |
| rs12484816 | NP_542942 | V | G | VG | possibly damaging |
| rs12484828 | NP_699165 | H | L | HL | probably damaging |
| rs12484828 | NP_878315 | H | L | HL | probably damaging |
| rs12485025 | XP_496526 | S | I | SI | benign            |
| rs12486358 | NP_003326 | R | Q | RQ | benign            |
| rs12487205 | NP_849144 | Y | H | YH | benign            |
| rs12487736 | NP_036367 | I | V | IV | benign            |
| rs12488237 | NP_056391 | N | S | NS | benign            |
| rs12488416 | NP_071503 | A | V | AV | benign            |
| rs12488879 | NP_009113 | H | R | HR | probably damaging |
| rs12488879 | NP_733831 | H | R | HR | probably damaging |
| rs12488879 | NP_733833 | H | R | HR | probably damaging |
| rs12488879 | NP_733832 | H | R | HR | probably damaging |
| rs12489516 | NP_001861 | M | T | MT | probably damaging |
| rs12490341 | NP_057022 | E | K | EK | benign            |
| rs12491032 | NP_066360 | R | S | RS | possibly damaging |
| rs12491947 | NP_004935 | N | K | NK | benign            |
| rs12492080 | NP_003839 | R | Q | RQ | benign            |
| rs12492494 | NP_705616 | A | V | AV | benign            |
| rs12492643 | NP_733762 | R | W | RW | probably damaging |
| rs12493789 | NP_000379 | T | A | TA | benign            |

|            |           |   |   |    |                   |
|------------|-----------|---|---|----|-------------------|
| rs12495050 | NP_005769 | S | N | SN | benign            |
| rs12495272 | XP_045290 | E | D | ED | benign            |
| rs12495696 | NP_690849 | S | G | SG | benign            |
| rs12495784 | NP_079541 | R | H | RH | benign            |
| rs12495998 | NP_009115 | T | P | TP | benign            |
| rs12498226 | NP_056011 | T | P | TP | benign            |
| rs12498340 | NP_861522 | T | A | TA | benign            |
| rs12498609 | NP_060098 | P | R | PR | probably damaging |
| rs12500797 | NP_542415 | E | K | EK | benign            |
| rs12500797 | NP_542416 | E | K | EK | benign            |
| rs12500797 | NP_006255 | E | K | EK | benign            |
| rs12500797 | NP_542414 | E | K | EK | benign            |
| rs12502450 | NP_002904 | I | N | IN | probably damaging |
| rs12504081 | NP_065926 | L | I | LI | benign            |
| rs12504081 | NP_116252 | L | I | LI | benign            |
| rs12504081 | NP_996672 | L | I | LI | benign            |
| rs12505221 | XP_087490 | L | M | LM | benign            |
| rs12506450 | XP_052597 | Q | R | QR | benign            |
| rs12507099 | NP_942595 | T | S | TS | benign            |
| rs12507229 | NP_055093 | N | T | NT | probably damaging |
| rs12507582 | XP_037817 | C | Y | CY | probably damaging |
| rs12507775 | NP_958834 | S | P | SP | benign            |
| rs12508222 | NP_078858 | D | N | DN | benign            |
| rs12508837 | NP_835144 | P | R | PR | benign            |
| rs12508837 | NP_060548 | P | R | PR | probably damaging |
| rs12509110 | NP_056051 | L | V | LV | benign            |
| rs12509135 | NP_000892 | S | L | SL | possibly damaging |
| rs12510688 | XP_496710 | C | R | CR | probably damaging |
| rs12512164 | NP_996672 | E | K | EK | benign            |
| rs12512551 | NP_006656 | A | G | AG | benign            |
| rs12513290 | NP_004353 | R | W | RW | benign            |
| rs12514417 | NP_001173 | K | Q | KQ | benign            |
| rs12514461 | NP_705838 | K | E | KE | benign            |
| rs12515587 | NP_115796 | H | P | HP | benign            |
| rs12515688 | NP_061760 | E | K | EK | possibly damaging |
| rs12516652 | NP_065847 | D | E | DE | benign            |
| rs12517177 | NP_037367 | L | V | LV | benign            |
| rs12517385 | NP_115796 | L | F | LF | benign            |
| rs12517689 | NP_004282 | L | M | LM | benign            |
| rs12519525 | NP_056031 | E | K | EK | benign            |
| rs12519612 | XP_047995 | T | P | TP | possibly damaging |
| rs12520040 | NP_056031 | R | K | RK | benign            |
| rs12520149 | NP_001456 | P | L | PL | probably damaging |
| rs12520455 | NP_005566 | N | I | NI | probably damaging |
| rs12520467 | NP_835260 | D | E | DE | benign            |
| rs12520516 | NP_861439 | P | S | PS | benign            |

|            |           |   |   |    |                   |
|------------|-----------|---|---|----|-------------------|
| rs12520591 | NP_852478 | I | M | IM | benign            |
| rs12520927 | NP_003305 | E | K | EK | benign            |
| rs12521930 | NP_004408 | D | H | DH | possibly damaging |
| rs12522205 | NP_689616 | R | P | RP | probably damaging |
| rs12522955 | NP_060610 | P | T | PT | possibly damaging |
| rs12523297 | XP_498008 | I | F | IF | benign            |
| rs12523365 | NP_954854 | F | L | FL | benign            |
| rs12523814 | NP_006705 | H | Y | HY | benign            |
| rs12524664 | NP_061978 | P | L | PL | probably damaging |
| rs12527029 | NP_060110 | R | C | RC | probably damaging |
| rs12528378 | NP_002215 | R | Q | RQ | benign            |
| rs12528473 | NP_619645 | K | Q | KQ | benign            |
| rs12528542 | NP_944602 | T | P | TP | benign            |
| rs12528684 | NP_006780 | G | R | GR | probably damaging |
| rs12528714 | NP_114155 | Q | H | QH | benign            |
| rs12530146 | NP_055426 | E | K | EK | benign            |
| rs12530380 | NP_000491 | V | E | VE | possibly damaging |
| rs12530633 | NP_065779 | E | K | EK | benign            |
| rs12532654 | XP_380107 | W | S | WS | probably damaging |
| rs12532726 | NP_775835 | R | G | RG | possibly damaging |
| rs12534498 | NP_065943 | V | I | VI | benign            |
| rs12534509 | XP_376720 | E | K | EK | benign            |
| rs12535348 | NP_620166 | A | T | AT | benign            |
| rs12535939 | XP_373223 | A | V | AV | benign            |
| rs12536223 | NP_061111 | P | L | PL | benign            |
| rs12536873 | XP_376720 | Q | H | QH | possibly damaging |
| rs12537344 | XP_498210 | P | L | PL | probably damaging |
| rs12537426 | XP_376720 | P | H | PH | possibly damaging |
| rs12537506 | NP_006515 | E | A | EA | benign            |
| rs12538164 | XP_380107 | H | Q | HQ | possibly damaging |
| rs12540098 | NP_078999 | A | P | AP | benign            |
| rs12540098 | NP_891554 | A | P | AP | benign            |
| rs12540583 | NP_945341 | S | A | SA | benign            |
| rs12540919 | NP_004394 | V | M | VM | benign            |
| rs12540944 | NP_059998 | V | I | VI | benign            |
| rs12541381 | NP_065914 | P | S | PS | possibly damaging |
| rs12542399 | NP_116291 | D | N | DN | benign            |
| rs12543389 | XP_372063 | Y | C | YC | probably damaging |
| rs12544296 | XP_496978 | G | S | GS | possibly damaging |
| rs12544854 | NP_004306 | M | V | MV | benign            |
| rs12544854 | NP_808592 | M | V | MV | benign            |
| rs12545877 | NP_002155 | R | K | RK | benign            |
| rs12546893 | NP_078997 | A | V | AV | benign            |
| rs12547305 | NP_116251 | E | K | EK | benign            |
| rs12547645 | NP_079471 | E | K | EK | benign            |
| rs12548737 | NP_919260 | V | M | VM | benign            |

|            |           |   |   |    |                   |
|------------|-----------|---|---|----|-------------------|
| rs12549052 | NP_113654 | L | M | LM | benign            |
| rs12549394 | NP_003497 | A | E | AE | benign            |
| rs12549973 | XP_291277 | A | T | AT | benign            |
| rs12549991 | NP_056069 | A | P | AP | benign            |
| rs12551333 | NP_054862 | D | H | DH | possibly damaging |
| rs12551345 | NP_057609 | M | T | MT | possibly damaging |
| rs12551350 | NP_958861 | I | V | IV | benign            |
| rs12552401 | XP_044196 | H | R | HR | possibly damaging |
| rs12552457 | XP_376902 | E | K | EK | benign            |
| rs12552812 | NP_067091 | G | R | GR | benign            |
| rs12553965 | XP_088551 | R | S | RS | benign            |
| rs12554941 | NP_064530 | V | M | VM | benign            |
| rs12555636 | XP_497071 | M | K | MK | benign            |
| rs12556365 | XP_291345 | P | L | PL | probably damaging |
| rs12557064 | XP_497092 | P | R | PR | probably damaging |
| rs12557898 | NP_872312 | Q | R | QR | benign            |
| rs12559947 | XP_372262 | P | L | PL | probably damaging |
| rs12561972 | NP_000960 | G | C | GC | probably damaging |
| rs12562058 | NP_003456 | Q | H | QH | benign            |
| rs12562244 | NP_000290 | L | M | LM | benign            |
| rs12562301 | NP_839943 | P | S | PS | probably damaging |
| rs12562699 | XP_060303 | N | Y | NY | benign            |
| rs12562749 | NP_006606 | A | V | AV | benign            |
| rs12563933 | NP_003167 | E | D | ED | benign            |
| rs12564026 | NP_000692 | S | I | SI | possibly damaging |
| rs12564040 | NP_071372 | A | D | AD | benign            |
| rs12564090 | NP_003030 | S | T | ST | benign            |
| rs12564106 | NP_036331 | P | L | PL | possibly damaging |
| rs12564229 | NP_006608 | L | M | LM | benign            |
| rs12564400 | NP_004393 | K | R | KR | benign            |
| rs12564512 | NP_000855 | T | A | TA | benign            |
| rs12564525 | XP_208213 | R | W | RW | probably damaging |
| rs12564869 | XP_038288 | H | L | HL | probably damaging |
| rs12565078 | XP_496394 | N | S | NS | benign            |
| rs12565542 | NP_996991 | D | Y | DY | possibly damaging |
| rs12565542 | NP_004310 | D | Y | DY | possibly damaging |
| rs12565736 | NP_757349 | S | N | SN | benign            |
| rs12565736 | NP_757351 | S | N | SN | benign            |
| rs12565918 | NP_060288 | V | E | VE | possibly damaging |
| rs12566550 | NP_000027 | R | C | RC | benign            |
| rs12567021 | NP_714914 | T | M | TM | benign            |
| rs12567134 | NP_000897 | P | A | PA | benign            |
| rs12567229 | NP_115646 | P | H | PH | benign            |
| rs12567377 | NP_001399 | G | R | GR | probably damaging |
| rs12568050 | XP_060597 | N | K | NK | benign            |
| rs12568796 | XP_378185 | K | E | KE | benign            |

|            |           |   |   |    |                   |
|------------|-----------|---|---|----|-------------------|
| rs12568823 | NP_775179 | A | S | AS | benign            |
| rs12568823 | NP_963863 | A | S | AS | benign            |
| rs12568823 | NP_963862 | A | S | AS | benign            |
| rs12568823 | NP_055652 | A | S | AS | benign            |
| rs12569066 | NP_115811 | S | A | SA | benign            |
| rs12569087 | NP_067646 | P | L | PL | probably damaging |
| rs12569699 | XP_166103 | D | N | DN | possibly damaging |
| rs12569742 | NP_004557 | G | S | GS | possibly damaging |
| rs12570139 | NP_116116 | L | F | LF | possibly damaging |
| rs12570964 | NP_062565 | R | P | RP | probably damaging |
| rs12571835 | NP_004184 | G | A | GA | possibly damaging |
| rs12572012 | NP_057279 | N | I | NI | benign            |
| rs12572125 | XP_291725 | E | K | EK | benign            |
| rs12572354 | NP_775289 | D | V | DV | possibly damaging |
| rs12572354 | NP_775285 | D | V | DV | possibly damaging |
| rs12572354 | NP_775287 | D | V | DV | possibly damaging |
| rs12572354 | NP_775464 | D | V | DV | probably damaging |
| rs12572354 | NP_775283 | D | V | DV | probably damaging |
| rs12572354 | NP_055406 | D | V | DV | probably damaging |
| rs12572354 | NP_775284 | D | V | DV | probably damaging |
| rs12572589 | NP_061172 | Q | H | QH | benign            |
| rs12572862 | XP_374779 | V | L | VL | benign            |
| rs12572897 | NP_071896 | P | L | PL | benign            |
| rs12574255 | NP_059509 | A | T | AT | benign            |
| rs12574508 | NP_112224 | Q | E | QE | benign            |
| rs12574667 | NP_996821 | T | P | TP | benign            |
| rs12574667 | NP_996823 | T | P | TP | benign            |
| rs12574667 | NP_996822 | T | P | TP | possibly damaging |
| rs12574779 | XP_171536 | C | G | CG | benign            |
| rs12575508 | XP_374860 | A | V | AV | benign            |
| rs12575547 | NP_002897 | L | V | LV | benign            |
| rs12576236 | NP_689525 | D | A | DA | probably damaging |
| rs12576296 | NP_057226 | S | L | SL | benign            |
| rs12576297 | XP_166777 | V | L | VL | benign            |
| rs12577137 | NP_001351 | A | G | AG | benign            |
| rs12577167 | XP_372357 | T | A | TA | benign            |
| rs12577564 | NP_060496 | H | L | HL | probably damaging |
| rs12578449 | NP_078827 | T | P | TP | possibly damaging |
| rs12578516 | NP_005260 | L | I | LI | benign            |
| rs12578654 | NP_795369 | C | Y | CY | possibly damaging |
| rs12579962 | NP_062570 | V | G | VG | possibly damaging |
| rs12579962 | NP_982269 | V | G | VG | possibly damaging |
| rs12580068 | NP_659419 | R | G | RG | probably damaging |
| rs12580378 | XP_029805 | R | H | RH | possibly damaging |
| rs12580544 | NP_444505 | G | R | GR | probably damaging |
| rs12580585 | XP_290592 | D | Y | DY | probably damaging |



|            |           |   |   |    |                   |
|------------|-----------|---|---|----|-------------------|
| rs12580717 | NP_006645 | K | N | KN | benign            |
| rs12580996 | NP_060918 | V | A | VA | benign            |
| rs12581634 | NP_700356 | R | M | RM | benign            |
| rs12581808 | NP_060742 | A | G | AG | benign            |
| rs12581902 | XP_058513 | N | I | NI | benign            |
| rs12581954 | XP_377259 | D | A | DA | probably damaging |
| rs12582172 | NP_849148 | G | S | GS | possibly damaging |
| rs12582405 | XP_373543 | P | T | PT | possibly damaging |
| rs12582646 | NP_002471 | C | W | CW | probably damaging |
| rs12583744 | NP_955751 | R | K | RK | benign            |
| rs12583744 | NP_775876 | R | K | RK | benign            |
| rs12584992 | NP_612459 | K | N | KN | benign            |
| rs12586264 | NP_078934 | A | P | AP | benign            |
| rs12586711 | NP_777638 | V | A | VA | benign            |
| rs12587066 | XP_029353 | L | M | LM | benign            |
| rs12587206 | XP_090885 | S | R | SR | possibly damaging |
| rs12587718 | XP_375067 | R | S | RS | possibly damaging |
| rs12588835 | XP_050278 | E | D | ED | benign            |
| rs12589748 | NP_055792 | A | V | AV | benign            |
| rs12590294 | NP_000248 | R | G | RG | benign            |
| rs12590446 | XP_372508 | F | S | FS | benign            |
| rs12590500 | NP_878250 | V | F | VF | benign            |
| rs12592337 | XP_496028 | G | E | GE | probably damaging |
| rs12592416 | XP_497472 | S | R | SR | benign            |
| rs12592972 | XP_496045 | M | T | MT | benign            |
| rs12593017 | XP_496026 | R | Q | RQ | benign            |
| rs12593397 | NP_057726 | R | H | RH | benign            |
| rs12593418 | XP_372548 | M | V | MV | benign            |
| rs12593498 | XP_496045 | V | A | VA | benign            |
| rs12593502 | XP_496045 | V | A | VA | benign            |
| rs12593817 | NP_079441 | A | V | AV | benign            |
| rs12593848 | NP_009131 | A | G | AG | benign            |
| rs12593848 | NP_658913 | A | G | AG | benign            |
| rs12593848 | NP_006729 | A | G | AG | benign            |
| rs12594837 | XP_031744 | R | C | RC | benign            |
| rs12596304 | NP_003032 | L | M | LM | benign            |
| rs12596670 | NP_001044 | R | K | RK | benign            |
| rs12596873 | NP_001044 | T | M | TM | benign            |
| rs12596941 | NP_877417 | A | V | AV | benign            |
| rs12597040 | NP_877417 | L | P | LP | benign            |
| rs12597291 | NP_079469 | R | Q | RQ | benign            |
| rs12597504 | NP_079215 | S | L | SL | benign            |
| rs12598574 | NP_055462 | P | L | PL | probably damaging |
| rs12598966 | NP_653201 | E | K | EK | benign            |
| rs12599339 | XP_377407 | T | A | TA | benign            |
| rs12599363 | XP_377407 | D | V | DV | probably damaging |

|            |           |   |   |    |                   |
|------------|-----------|---|---|----|-------------------|
| rs12599623 | XP_373688 | E | K | EK | benign            |
| rs12599659 | XP_370944 | R | K | RK | benign            |
| rs12599808 | NP_056062 | G | D | GD | possibly damaging |
| rs12600339 | NP_000204 | D | N | DN | benign            |
| rs12600564 | NP_116035 | T | I | TI | benign            |
| rs12601015 | NP_065812 | S | R | SR | benign            |
| rs12601317 | XP_371084 | T | A | TA | benign            |
| rs12601670 | XP_208993 | A | E | AE | benign            |
| rs12602205 | XP_292627 | R | Q | RQ | benign            |
| rs12602520 | XP_371036 | V | G | VG | benign            |
| rs12602543 | NP_115987 | L | V | LV | benign            |
| rs12602590 | NP_644814 | A | T | AT | benign            |
| rs12602772 | XP_497558 | L | V | LV | benign            |
| rs12602985 | NP_775774 | G | R | GR | possibly damaging |
| rs12603476 | NP_065804 | D | A | DA | probably damaging |
| rs12603700 | NP_683684 | G | E | GE | probably damaging |
| rs12603751 | NP_002265 | A | V | AV | benign            |
| rs12603751 | NP_705694 | A | V | AV | benign            |
| rs12603884 | NP_003584 | P | Q | PQ | possibly damaging |
| rs12604020 | NP_689564 | A | V | AV | benign            |
| rs12604202 | XP_496268 | L | S | LS | possibly damaging |
| rs12604237 | XP_496268 | G | S | GS | benign            |
| rs12605457 | NP_765975 | L | M | LM | benign            |
| rs12605457 | NP_765977 | L | M | LM | benign            |
| rs12605457 | NP_765978 | L | M | LM | benign            |
| rs12605457 | NP_006153 | L | M | LM | benign            |
| rs12606006 | NP_114097 | D | N | DN | possibly damaging |
| rs12606220 | NP_073751 | L | F | LF | benign            |
| rs12607385 | NP_659457 | R | C | RC | possibly damaging |
| rs12607773 | NP_060725 | E | G | EG | benign            |
| rs12607841 | NP_005550 | A | V | AV | benign            |
| rs12608574 | NP_974199 | G | A | GA | benign            |
| rs12608777 | XP_371146 | P | R | PR | probably damaging |
| rs12608849 | NP_115823 | L | F | LF | benign            |
| rs12608919 | XP_496281 | P | L | PL | possibly damaging |
| rs12608979 | NP_612421 | A | T | AT | benign            |
| rs12609004 | NP_612421 | N | K | NK | benign            |
| rs12609039 | NP_065863 | P | L | PL | probably damaging |
| rs12609217 | XP_064903 | D | V | DV | possibly damaging |
| rs12609268 | NP_067040 | I | V | IV | benign            |
| rs12609440 | NP_699160 | A | D | AD | benign            |
| rs12609732 | XP_371195 | L | P | LP | probably damaging |
| rs12609976 | NP_573441 | A | T | AT | benign            |
| rs12610019 | NP_071386 | T | A | TA | benign            |
| rs12610094 | XP_372708 | V | A | VA | benign            |
| rs12610254 | NP_060685 | S | T | ST | benign            |

|            |           |   |   |    |                   |
|------------|-----------|---|---|----|-------------------|
| rs12610328 | NP_037444 | A | T | AT | benign            |
| rs12610462 | XP_292836 | G | E | GE | probably damaging |
| rs12610577 | NP_079405 | T | I | TI | benign            |
| rs12610701 | NP_597709 | E | D | ED | benign            |
| rs12610718 | NP_056498 | L | M | LM | benign            |
| rs12610859 | NP_689567 | R | G | RG | possibly damaging |
| rs12610885 | NP_005026 | P | S | PS | benign            |
| rs12610911 | XP_497618 | W | C | WC | benign            |
| rs12611040 | NP_975011 | P | S | PS | benign            |
| rs12611105 | NP_612356 | R | W | RW | probably damaging |
| rs12611254 | NP_997278 | S | G | SG | benign            |
| rs12611425 | NP_975011 | N | K | NK | benign            |
| rs12611491 | NP_055962 | R | G | RG | possibly damaging |
| rs12612177 | XP_372941 | S | F | SF | benign            |
| rs12612365 | NP_055312 | I | V | IV | benign            |
| rs12612793 | NP_002372 | G | S | GS | possibly damaging |
| rs12614667 | NP_055368 | A | D | AD | benign            |
| rs12615112 | NP_115917 | I | V | IV | benign            |
| rs12615747 | XP_065750 | T | A | TA | benign            |
| rs12617205 | NP_008851 | V | I | VI | benign            |
| rs12617638 | NP_001623 | R | H | RH | probably damaging |
| rs12618071 | NP_115642 | S | F | SF | benign            |
| rs12618227 | NP_078898 | E | Q | EQ | benign            |
| rs12618284 | NP_056390 | D | N | DN | benign            |
| rs12618388 | NP_084656 | S | I | SI | possibly damaging |
| rs12618388 | NP_084655 | S | I | SI | possibly damaging |
| rs12618388 | NP_084657 | S | I | SI | probably damaging |
| rs12618388 | NP_005261 | S | I | SI | probably damaging |
| rs12619169 | NP_003846 | G | R | GR | benign            |
| rs12619995 | NP_056080 | S | P | SP | benign            |
| rs12620556 | NP_620158 | M | V | MV | benign            |
| rs12620825 | NP_852111 | T | A | TA | benign            |
| rs12620825 | NP_000136 | T | A | TA | benign            |
| rs12621643 | NP_542402 | E | D | ED | benign            |
| rs12623297 | XP_373979 | Q | R | QR | benign            |
| rs12623569 | NP_078808 | T | K | TK | possibly damaging |
| rs12623642 | NP_659475 | V | F | VF | possibly damaging |
| rs12624954 | NP_620713 | G | R | GR | possibly damaging |
| rs12624995 | NP_542970 | V | G | VG | possibly damaging |
| rs12625565 | XP_372866 | Q | H | QH | possibly damaging |
| rs12627333 | XP_371409 | T | P | TP | possibly damaging |
| rs12627708 | NP_149363 | S | R | SR | possibly damaging |
| rs12627910 | NP_006062 | R | I | RI | possibly damaging |
| rs12628208 | NP_055909 | I | M | IM | benign            |
| rs12628507 | NP_114096 | V | G | VG | possibly damaging |
| rs12629133 | XP_371617 | A | T | AT | benign            |

|            |           |   |   |    |                   |
|------------|-----------|---|---|----|-------------------|
| rs12629332 | XP_046264 | Q | H | QH | possibly damaging |
| rs12629765 | XP_372992 | Q | H | QH | benign            |
| rs12629872 | NP_001618 | L | M | LM | benign            |
| rs12629962 | NP_003732 | L | I | LI | benign            |
| rs12630596 | NP_056281 | P | L | PL | probably damaging |
| rs12630957 | NP_002664 | P | H | PH | probably damaging |
| rs12631343 | NP_004078 | L | V | LV | benign            |
| rs12632177 | NP_055893 | T | M | TM | benign            |
| rs12632456 | NP_001448 | M | V | MV | benign            |
| rs12632942 | NP_006505 | L | P | LP | benign            |
| rs12634179 | NP_473451 | P | A | PA | benign            |
| rs12636502 | NP_055951 | L | M | LM | benign            |
| rs12637267 | NP_997190 | P | S | PS | possibly damaging |
| rs12637996 | NP_060501 | D | N | DN | benign            |
| rs12638212 | XP_036988 | T | I | TI | possibly damaging |
| rs12638601 | NP_054858 | Y | H | YH | benign            |
| rs12638625 | NP_078963 | A | G | AG | benign            |
| rs12638839 | NP_002206 | I | M | IM | benign            |
| rs12639244 | NP_057257 | A | V | AV | benign            |
| rs12639568 | NP_659474 | G | R | GR | benign            |
| rs12640082 | NP_689892 | T | P | TP | possibly damaging |
| rs12641721 | NP_660306 | A | G | AG | benign            |
| rs12641972 | NP_777560 | K | N | KN | benign            |
| rs12642508 | NP_775098 | Q | R | QR | benign            |
| rs12642536 | NP_620775 | A | T | AT | benign            |
| rs12643294 | XP_371715 | G | R | GR | possibly damaging |
| rs12643783 | XP_497977 | A | T | AT | benign            |
| rs12644923 | XP_042661 | Q | H | QH | benign            |
| rs12645298 | XP_050219 | G | A | GA | benign            |
| rs12645577 | NP_060548 | R | H | RH | probably damaging |
| rs12645668 | XP_496705 | E | K | EK | possibly damaging |
| rs12646270 | NP_031377 | G | D | GD | possibly damaging |
| rs12647859 | NP_997374 | G | S | GS | benign            |
| rs12648093 | NP_009014 | C | R | CR | probably damaging |
| rs12648735 | XP_496692 | F | L | FL | benign            |
| rs12650153 | NP_078858 | S | N | SN | benign            |
| rs12650626 | NP_116586 | G | E | GE | possibly damaging |
| rs12651301 | NP_694540 | P | L | PL | probably damaging |
| rs12651770 | NP_065122 | G | R | GR | probably damaging |
| rs12651836 | NP_004376 | G | V | GV | possibly damaging |
| rs12653130 | NP_001438 | T | S | TS | benign            |
| rs12653648 | NP_036475 | S | N | SN | benign            |
| rs12653648 | NP_892022 | S | N | SN | benign            |
| rs12654078 | XP_208333 | T | I | TI | benign            |
| rs12654463 | XP_208333 | L | R | LR | benign            |
| rs12654652 | XP_373076 | I | L | IL | benign            |

|            |           |   |   |    |                   |
|------------|-----------|---|---|----|-------------------|
| rs12656588 | NP_000949 | A | G | AG | benign            |
| rs12657663 | NP_001736 | V | I | VI | benign            |
| rs12659447 | XP_371755 | R | M | RM | benign            |
| rs12660745 | XP_371797 | F | S | FS | benign            |
| rs12660881 | NP_061914 | L | F | LF | benign            |
| rs12661031 | XP_371797 | F | S | FS | benign            |
| rs12661281 | NP_116183 | D | V | DV | possibly damaging |
| rs12661281 | NP_079533 | D | V | DV | possibly damaging |
| rs12662753 | NP_443136 | D | G | DG | possibly damaging |
| rs12662902 | XP_371835 | V | I | VI | benign            |
| rs12663265 | NP_004091 | L | M | LM | benign            |
| rs12663265 | NP_742103 | L | M | LM | benign            |
| rs12663315 | NP_001362 | F | C | FC | possibly damaging |
| rs12663349 | NP_066406 | V | G | VG | probably damaging |
| rs12663405 | NP_056160 | A | T | AT | benign            |
| rs12663573 | NP_003958 | E | K | EK | benign            |
| rs12664076 | NP_002935 | D | H | DH | possibly damaging |
| rs12665154 | NP_072047 | A | V | AV | benign            |
| rs12665154 | NP_542131 | A | V | AV | benign            |
| rs12666503 | NP_085047 | S | P | SP | benign            |
| rs12666875 | NP_000080 | P | H | PH | probably damaging |
| rs12666989 | XP_380026 | L | V | LV | benign            |
| rs12668484 | XP_376720 | A | T | AT | benign            |
| rs12669450 | NP_006519 | R | Q | RQ | benign            |
| rs12669721 | XP_059830 | T | P | TP | possibly damaging |
| rs12671170 | NP_877439 | E | A | EA | benign            |
| rs12671708 | XP_376567 | A | G | AG | benign            |
| rs12671839 | XP_376720 | I | T | IT | benign            |
| rs12672119 | NP_115598 | A | V | AV | benign            |
| rs12672139 | XP_054313 | D | N | DN | benign            |
| rs12672205 | NP_036401 | M | V | MV | benign            |
| rs12673074 | XP_376631 | R | G | RG | possibly damaging |
| rs12674022 | NP_733751 | N | T | NT | benign            |
| rs12674488 | NP_078872 | T | N | TN | possibly damaging |
| rs12675375 | NP_060881 | G | D | GD | benign            |
| rs12675375 | NP_005135 | G | D | GD | possibly damaging |
| rs12675537 | NP_665697 | S | F | SF | benign            |
| rs12675800 | NP_079146 | H | P | HP | probably damaging |
| rs12676664 | NP_958786 | T | S | TS | benign            |
| rs12676664 | NP_958785 | T | S | TS | benign            |
| rs12676664 | NP_958784 | T | S | TS | benign            |
| rs12676664 | NP_958783 | T | S | TS | benign            |
| rs12676664 | NP_958782 | T | S | TS | benign            |
| rs12676664 | NP_958781 | T | S | TS | benign            |
| rs12676664 | NP_958780 | T | S | TS | benign            |
| rs12676664 | NP_000436 | T | S | TS | benign            |

|            |           |   |   |    |                   |
|------------|-----------|---|---|----|-------------------|
| rs12677973 | NP_038460 | Q | H | QH | benign            |
| rs12678588 | NP_002681 | R | Q | RQ | benign            |
| rs12678871 | NP_056069 | S | I | SI | possibly damaging |
| rs12679538 | NP_005135 | L | M | LM | benign            |
| rs12679538 | NP_060881 | L | M | LM | benign            |
| rs12679914 | NP_003146 | L | M | LM | benign            |
| rs12680645 | NP_003037 | V | M | VM | benign            |
| rs12681991 | NP_473369 | L | P | LP | probably damaging |
| rs12682945 | NP_113620 | L | P | LP | benign            |
| rs12683102 | XP_034640 | N | S | NS | possibly damaging |
| rs12684476 | NP_056652 | G | S | GS | possibly damaging |
| rs12684476 | NP_056653 | G | S | GS | possibly damaging |
| rs12684476 | NP_004099 | G | S | GS | possibly damaging |
| rs12684768 | NP_067632 | V | E | VE | benign            |
| rs12684910 | NP_115669 | S | N | SN | benign            |
| rs12685217 | NP_061819 | A | S | AS | benign            |
| rs12685968 | NP_000599 | G | R | GR | probably damaging |
| rs12686150 | NP_060046 | Q | H | QH | possibly damaging |
| rs12686298 | NP_666023 | L | V | LV | benign            |
| rs12686794 | XP_039698 | E | Q | EQ | benign            |
| rs12688326 | NP_060318 | G | R | GR | benign            |
| rs12688415 | NP_660277 | R | H | RH | possibly damaging |
| rs12688600 | NP_619648 | G | C | GC | benign            |
| rs12689461 | NP_008917 | L | M | LM | benign            |
| rs12689863 | XP_050478 | S | L | SL | benign            |
| rs12689910 | NP_036212 | M | T | MT | possibly damaging |
| rs12689920 | NP_872114 | P | L | PL | probably damaging |
| rs12689931 | NP_003150 | E | K | EK | benign            |
| rs12690435 | NP_002107 | F | I | FI | probably damaging |
| rs12691089 | NP_001637 | G | D | GD | benign            |
| rs12692060 | XP_496601 | I | T | IT | benign            |
| rs12692061 | XP_496601 | I | M | IM | benign            |
| rs12692566 | NP_002340 | N | K | NK | possibly damaging |
| rs12695473 | XP_114301 | G | S | GS | benign            |
| rs12697943 | NP_005505 | R | L | RL | benign            |
| rs12698061 | XP_373223 | T | K | TK | benign            |
| rs12701034 | NP_115598 | T | M | TM | benign            |
| rs12703712 | XP_498243 | K | E | KE | benign            |
| rs12703713 | XP_498243 | R | K | RK | benign            |
| rs12703714 | XP_498243 | V | L | VL | benign            |
| rs12708402 | NP_057726 | V | I | VI | benign            |
| rs12708965 | NP_000330 | R | C | RC | probably damaging |
| rs12709426 | NP_000780 | D | G | DG | possibly damaging |
| rs12709442 | NP_690044 | T | M | TM | possibly damaging |
| rs12709442 | NP_000780 | T | M | TM | possibly damaging |
| rs12709442 | NP_690043 | T | M | TM | possibly damaging |

|            |           |   |   |    |                   |
|------------|-----------|---|---|----|-------------------|
| rs12711521 | NP_006601 | D | Y | DY | probably damaging |
| rs12711538 | NP_084656 | N | D | ND | benign            |
| rs12711538 | NP_084655 | N | D | ND | possibly damaging |
| rs12713843 | NP_000375 | R | H | RH | benign            |
| rs12713844 | NP_000375 | D | H | DH | possibly damaging |
| rs12714097 | NP_000375 | P | L | PL | probably damaging |
| rs12714176 | NP_057706 | P | S | PS | benign            |
| rs12714176 | NP_663619 | P | S | PS | probably damaging |
| rs12714192 | NP_000375 | T | N | TN | benign            |
| rs12714214 | NP_000375 | P | L | PL | probably damaging |
| rs12714225 | NP_000375 | I | T | IT | benign            |
| rs12715125 | NP_005433 | A | G | AG | benign            |
| rs12717411 | NP_057434 | S | T | ST | benign            |
| rs12717411 | NP_065972 | S | T | ST | benign            |
| rs12717411 | NP_891989 | S | T | ST | benign            |
| rs12717411 | NP_891990 | S | T | ST | benign            |
| rs12717411 | NP_891991 | S | T | ST | benign            |
| rs12718341 | NP_005299 | R | P | RP | possibly damaging |
| rs12719734 | NP_859523 | V | M | VM | benign            |
| rs12719734 | NP_859524 | V | M | VM | benign            |
| rs12719734 | NP_060618 | V | M | VM | benign            |
| rs12719860 | NP_872400 | D | A | DA | benign            |
| rs12720060 | NP_002182 | P | A | PA | probably damaging |
| rs12720061 | NP_002182 | G | R | GR | probably damaging |
| rs12720062 | NP_002182 | A | T | AT | benign            |
| rs12720065 | NP_000006 | L | V | LV | benign            |
| rs12720160 | NP_000106 | P | T | PT | benign            |
| rs12720160 | NP_003982 | P | T | PT | possibly damaging |
| rs12720263 | NP_003322 | R | H | RH | benign            |
| rs12720343 | NP_003322 | R | H | RH | benign            |
| rs12720356 | NP_003322 | I | S | IS | possibly damaging |
| rs12720386 | NP_000788 | D | E | DE | benign            |
| rs12720441 | NP_742053 | R | W | RW | probably damaging |
| rs12720441 | NP_742054 | R | W | RW | probably damaging |
| rs12720441 | NP_000229 | R | W | RW | probably damaging |
| rs12720442 | NP_002225 | A | T | AT | benign            |
| rs12720445 | NP_002225 | R | K | RK | benign            |
| rs12720449 | NP_000209 | P | R | PR | benign            |
| rs12720449 | NP_861462 | P | R | PR | possibly damaging |
| rs12720449 | NP_861463 | P | R | PR | possibly damaging |
| rs12720451 | NP_932173 | L | F | LF | benign            |
| rs12720451 | NP_000326 | L | F | LF | benign            |
| rs12720452 | NP_000326 | G | E | GE | benign            |
| rs12720452 | NP_932173 | G | E | GE | possibly damaging |
| rs12720456 | NP_932173 | F | S | FS | possibly damaging |
| rs12720456 | NP_000326 | F | S | FS | probably damaging |

|            |           |   |   |    |                   |
|------------|-----------|---|---|----|-------------------|
| rs12720457 | NP_861462 | K | N | KN | benign            |
| rs12720457 | NP_861463 | K | N | KN | benign            |
| rs12720457 | NP_000209 | K | N | KN | benign            |
| rs12720458 | NP_861462 | K | R | KR | benign            |
| rs12720458 | NP_861463 | K | R | KR | benign            |
| rs12720458 | NP_000209 | K | R | KR | benign            |
| rs12720459 | NP_861462 | A | V | AV | benign            |
| rs12720459 | NP_861463 | A | V | AV | benign            |
| rs12720459 | NP_000209 | A | V | AV | benign            |
| rs12720471 | NP_724781 | Q | K | QK | benign            |
| rs12720471 | NP_758519 | Q | K | QK | benign            |
| rs12720471 | NP_000751 | Q | K | QK | benign            |
| rs12720474 | NP_000667 | A | V | AV | benign            |
| rs12720588 | NP_077734 | V | I | VI | benign            |
| rs12720742 | NP_690044 | T | M | TM | possibly damaging |
| rs12720742 | NP_000780 | T | M | TM | possibly damaging |
| rs12720742 | NP_690043 | T | M | TM | possibly damaging |
| rs12720745 | NP_000780 | R | Q | RQ | benign            |
| rs12720745 | NP_690043 | R | Q | RQ | benign            |
| rs12720746 | NP_000780 | V | A | VA | benign            |
| rs12720754 | NP_000780 | A | T | AT | benign            |
| rs12720848 | NP_000375 | H | N | HN | possibly damaging |
| rs12720854 | NP_000375 | S | G | SG | benign            |
| rs12720855 | NP_000375 | S | P | SP | possibly damaging |
| rs12721225 | NP_114438 | A | S | AS | benign            |
| rs12721226 | NP_114438 | A | T | AT | benign            |
| rs12721427 | NP_149162 | V | I | VI | benign            |
| rs12721431 | NP_003830 | G | S | GS | benign            |
| rs12721445 | NP_143026 | T | A | TA | benign            |
| rs12721461 | NP_066268 | V | A | VA | probably damaging |
| rs12721461 | NP_620073 | V | A | VA | probably damaging |
| rs12721471 | NP_037483 | I | V | IV | benign            |
| rs12721473 | NP_066939 | P | L | PL | probably damaging |
| rs12721477 | NP_066939 | A | T | AT | benign            |
| rs12721497 | NP_006632 | M | V | MV | benign            |
| rs12721497 | NP_112477 | M | V | MV | benign            |
| rs12721498 | NP_006632 | I | V | IV | benign            |
| rs12721498 | NP_112477 | I | V | IV | benign            |
| rs12721504 | NP_003870 | D | V | DV | probably damaging |
| rs12721512 | NP_757349 | A | V | AV | benign            |
| rs12721512 | NP_757350 | A | V | AV | benign            |
| rs12721512 | NP_757351 | A | V | AV | benign            |
| rs12721516 | NP_757349 | S | F | SF | benign            |
| rs12721516 | NP_757350 | S | F | SF | benign            |
| rs12721516 | NP_757351 | S | F | SF | benign            |
| rs12721523 | NP_031379 | F | L | FL | probably damaging |



|            |           |   |   |    |                   |
|------------|-----------|---|---|----|-------------------|
| rs12721527 | NP_031379 | L | P | LP | benign            |
| rs12721528 | NP_031379 | F | L | FL | probably damaging |
| rs12721529 | NP_031379 | Y | H | YH | possibly damaging |
| rs12721535 | NP_002061 | R | C | RC | probably damaging |
| rs12721572 | NP_068810 | M | V | MV | benign            |
| rs12721594 | NP_510867 | R | Q | RQ | benign            |
| rs12721607 | NP_148934 | G | R | GR | probably damaging |
| rs12721607 | NP_003880 | G | R | GR | probably damaging |
| rs12721607 | NP_071285 | G | R | GR | probably damaging |
| rs12721608 | NP_003880 | R | Q | RQ | benign            |
| rs12721608 | NP_071285 | R | Q | RQ | benign            |
| rs12721608 | NP_148934 | R | Q | RQ | possibly damaging |
| rs12721613 | NP_148934 | P | S | PS | possibly damaging |
| rs12721613 | NP_003880 | P | S | PS | probably damaging |
| rs12721613 | NP_071285 | P | S | PS | probably damaging |
| rs12721627 | NP_059488 | T | S | TS | possibly damaging |
| rs12721629 | NP_059488 | L | F | LF | possibly damaging |
| rs12721634 | NP_059488 | L | P | LP | probably damaging |
| rs12721643 | NP_004818 | I | L | IL | benign            |
| rs12721655 | NP_000758 | K | E | KE | possibly damaging |
| rs12721658 | NP_002107 | V | I | VI | benign            |
| rs12721659 | NP_002107 | A | P | AP | benign            |
| rs12721661 | NP_002107 | A | S | AS | benign            |
| rs12721662 | NP_002107 | A | V | AV | benign            |
| rs12721663 | NP_002107 | W | R | WR | possibly damaging |
| rs12721665 | NP_002107 | H | Q | HQ | benign            |
| rs12721666 | NP_002107 | R | S | RS | benign            |
| rs12721667 | NP_002107 | Y | C | YC | probably damaging |
| rs12721668 | NP_002107 | F | I | FI | benign            |
| rs12721669 | NP_002107 | V | M | VM | benign            |
| rs12721670 | NP_002107 | R | P | RP | probably damaging |
| rs12721671 | NP_002107 | G | E | GE | benign            |
| rs12721673 | NP_002107 | E | K | EK | benign            |
| rs12721674 | NP_002107 | A | S | AS | benign            |
| rs12721676 | NP_002107 | D | N | DN | benign            |
| rs12721677 | NP_002107 | F | L | FL | probably damaging |
| rs12721678 | NP_002107 | R | Q | RQ | benign            |
| rs12721679 | NP_002107 | A | G | AG | possibly damaging |
| rs12721680 | NP_002107 | Q | R | QR | benign            |
| rs12721681 | NP_002107 | P | L | PL | probably damaging |
| rs12721684 | NP_002107 | I | M | IM | benign            |
| rs12721685 | NP_002107 | Q | R | QR | benign            |
| rs12721686 | NP_002107 | P | A | PA | probably damaging |
| rs12721688 | NP_002107 | N | H | NH | benign            |
| rs12721689 | NP_002107 | K | R | KR | possibly damaging |
| rs12721690 | NP_002107 | A | G | AG | benign            |

|            |           |   |   |    |                   |
|------------|-----------|---|---|----|-------------------|
| rs12721692 | NP_002107 | D | H | DH | benign            |
| rs12721695 | NP_002107 | G | A | GA | benign            |
| rs12721697 | NP_002107 | Q | E | QE | benign            |
| rs12721698 | NP_002107 | Q | H | QH | benign            |
| rs12721699 | NP_002107 | S | T | ST | possibly damaging |
| rs12721700 | NP_002107 | I | V | IV | benign            |
| rs12721701 | NP_002107 | Y | H | YH | benign            |
| rs12721706 | NP_002107 | D | H | DH | benign            |
| rs12721709 | NP_002107 | R | H | RH | probably damaging |
| rs12721711 | NP_002107 | F | L | FL | benign            |
| rs12721713 | NP_002107 | R | C | RC | probably damaging |
| rs12721714 | NP_002107 | R | H | RH | benign            |
| rs12721716 | NP_002107 | R | G | RG | probably damaging |
| rs12721718 | NP_002107 | Q | R | QR | possibly damaging |
| rs12721719 | NP_002107 | D | A | DA | probably damaging |
| rs12721722 | NP_002107 | D | Y | DY | probably damaging |
| rs12721723 | NP_002107 | A | S | AS | benign            |
| rs12721724 | NP_002107 | E | V | EV | probably damaging |
| rs12721726 | NP_002107 | R | S | RS | benign            |
| rs12721730 | NP_002107 | M | R | MR | benign            |
| rs12721732 | NP_002107 | Q | P | QP | benign            |
| rs12721734 | NP_002107 | K | R | KR | benign            |
| rs12721736 | NP_002107 | H | N | HN | benign            |
| rs12721737 | NP_002107 | A | E | AE | possibly damaging |
| rs12721738 | NP_002107 | D | H | DH | benign            |
| rs12721739 | NP_002107 | G | A | GA | possibly damaging |
| rs12721742 | NP_002107 | V | L | VL | benign            |
| rs12721743 | NP_002107 | Y | H | YH | benign            |
| rs12721744 | NP_002107 | G | R | GR | probably damaging |
| rs12721745 | NP_002107 | E | K | EK | benign            |
| rs12721746 | NP_002107 | T | A | TA | benign            |
| rs12721751 | NP_002107 | K | R | KR | benign            |
| rs12721758 | NP_002107 | T | I | TI | benign            |
| rs12721760 | NP_002107 | A | E | AE | probably damaging |
| rs12721761 | NP_002107 | A | V | AV | benign            |
| rs12721764 | NP_002107 | K | E | KE | benign            |
| rs12721765 | NP_002107 | I | V | IV | benign            |
| rs12721766 | NP_002107 | P | H | PH | benign            |
| rs12721768 | NP_002107 | I | L | IL | benign            |
| rs12721769 | NP_002107 | G | A | GA | benign            |
| rs12721770 | NP_002107 | R | K | RK | benign            |
| rs12721771 | NP_005505 | A | E | AE | benign            |
| rs12721772 | NP_005505 | S | F | SF | benign            |
| rs12721773 | NP_005505 | Y | H | YH | benign            |
| rs12721776 | NP_005505 | G | V | GV | benign            |
| rs12721778 | NP_005505 | P | L | PL | probably damaging |

|            |           |   |   |    |                   |
|------------|-----------|---|---|----|-------------------|
| rs12721779 | NP_005505 | R | P | RP | probably damaging |
| rs12721780 | NP_005505 | V | A | VA | benign            |
| rs12721781 | NP_005505 | F | L | FL | probably damaging |
| rs12721782 | NP_005505 | D | N | DN | probably damaging |
| rs12721783 | NP_005505 | S | R | SR | benign            |
| rs12721784 | NP_005505 | P | Q | PQ | benign            |
| rs12721786 | NP_005505 | E | A | EA | benign            |
| rs12721787 | NP_005505 | E | D | ED | benign            |
| rs12721788 | NP_005505 | P | T | PT | probably damaging |
| rs12721789 | NP_005505 | R | P | RP | probably damaging |
| rs12721790 | NP_005505 | I | V | IV | benign            |
| rs12721791 | NP_005505 | I | M | IM | benign            |
| rs12721792 | NP_005505 | G | R | GR | benign            |
| rs12721793 | NP_005505 | P | R | PR | probably damaging |
| rs12721796 | NP_005505 | E | A | EA | benign            |
| rs12721798 | NP_005505 | Y | H | YH | benign            |
| rs12721799 | NP_005505 | Y | F | YF | possibly damaging |
| rs12721801 | NP_005505 | D | E | DE | benign            |
| rs12721802 | NP_005505 | R | G | RG | benign            |
| rs12721803 | NP_005505 | R | P | RP | possibly damaging |
| rs12721807 | NP_005505 | T | I | TI | probably damaging |
| rs12721815 | NP_005505 | A | V | AV | benign            |
| rs12721816 | NP_005505 | Q | R | QR | possibly damaging |
| rs12721818 | NP_005505 | D | G | DG | benign            |
| rs12721820 | NP_005505 | E | V | EV | benign            |
| rs12721822 | NP_005505 | G | A | GA | possibly damaging |
| rs12721823 | NP_005505 | Y | H | YH | possibly damaging |
| rs12721827 | NP_005505 | T | I | TI | benign            |
| rs12721829 | NP_005505 | L | F | LF | benign            |
| rs12721830 | NP_005505 | L | R | LR | probably damaging |
| rs12721832 | NP_005505 | Q | H | QH | probably damaging |
| rs12721833 | NP_005505 | S | G | SG | benign            |
| rs12721834 | NP_005505 | M | T | MT | probably damaging |
| rs12721835 | NP_005505 | Y | F | YF | benign            |
| rs12721837 | NP_005505 | R | L | RL | probably damaging |
| rs12721839 | NP_005505 | L | F | LF | benign            |
| rs12721840 | NP_005505 | R | P | RP | probably damaging |
| rs12721843 | NP_005505 | D | E | DE | benign            |
| rs12721844 | NP_005505 | Q | R | QR | possibly damaging |
| rs12721845 | NP_005505 | Y | C | YC | benign            |
| rs12721846 | NP_005505 | G | S | GS | benign            |
| rs12721847 | NP_005505 | D | N | DN | possibly damaging |
| rs12721848 | NP_005505 | A | T | AT | benign            |
| rs12721849 | NP_005505 | N | K | NK | benign            |
| rs12721852 | NP_005505 | D | N | DN | benign            |
| rs12721853 | NP_005505 | D | E | DE | possibly damaging |

|            |           |   |   |    |                   |
|------------|-----------|---|---|----|-------------------|
| rs12721857 | NP_005505 | T | S | TS | benign            |
| rs12721858 | NP_005505 | T | I | TI | probably damaging |
| rs12721860 | NP_005505 | Q | R | QR | possibly damaging |
| rs12721861 | NP_005505 | W | L | WL | benign            |
| rs12721862 | NP_005505 | R | L | RL | benign            |
| rs12721863 | NP_005505 | E | Q | EQ | benign            |
| rs12721864 | NP_005505 | E | D | ED | benign            |
| rs12721865 | NP_005505 | R | W | RW | probably damaging |
| rs12721867 | NP_005505 | A | V | AV | benign            |
| rs12721869 | NP_005505 | Y | C | YC | benign            |
| rs12721870 | NP_005505 | G | D | GD | benign            |
| rs12721871 | NP_005505 | V | A | VA | benign            |
| rs12721872 | NP_005505 | E | D | ED | benign            |
| rs12721873 | NP_005505 | W | G | WG | possibly damaging |
| rs12721875 | NP_005505 | A | S | AS | benign            |
| rs12721876 | NP_005505 | A | G | AG | benign            |
| rs12721879 | NP_005505 | R | G | RG | benign            |
| rs12721880 | NP_005505 | A | T | AT | benign            |
| rs12721882 | NP_005505 | P | L | PL | benign            |
| rs12721883 | NP_005505 | E | Q | EQ | benign            |
| rs12721889 | NP_005505 | K | E | KE | benign            |
| rs12721890 | NP_005505 | L | F | LF | benign            |
| rs12721891 | NP_005505 | L | R | LR | possibly damaging |
| rs12721892 | NP_005505 | E | K | EK | benign            |
| rs12721896 | NP_005505 | V | I | VI | benign            |
| rs12721897 | NP_005505 | V | A | VA | benign            |
| rs12721900 | NP_005505 | V | A | VA | benign            |
| rs12721904 | NP_005505 | G | A | GA | benign            |
| rs12721909 | NP_005505 | C | W | CW | probably damaging |
| rs12721910 | NP_005505 | S | R | SR | benign            |
| rs12721911 | NP_005505 | S | T | ST | possibly damaging |
| rs12721912 | NP_005505 | S | R | SR | possibly damaging |
| rs12721913 | NP_005505 | D | Y | DY | benign            |
| rs12721914 | NP_005505 | D | A | DA | probably damaging |
| rs12721915 | NP_005505 | D | E | DE | benign            |
| rs12721916 | NP_005505 | S | C | SC | possibly damaging |
| rs12721917 | NP_005505 | S | T | ST | benign            |
| rs12722010 | NP_291032 | E | D | ED | possibly damaging |
| rs12722011 | NP_291032 | A | P | AP | benign            |
| rs12722013 | NP_002112 | F | V | FV | benign            |
| rs12722014 | NP_002112 | R | L | RL | benign            |
| rs12722015 | NP_002112 | A | P | AP | benign            |
| rs12722016 | NP_002112 | Y | D | YD | probably damaging |
| rs12722018 | NP_002112 | E | Q | EQ | benign            |
| rs12722021 | NP_002112 | G | W | GW | probably damaging |
| rs12722023 | NP_002112 | E | V | EV | probably damaging |

|            |           |   |   |    |                   |
|------------|-----------|---|---|----|-------------------|
| rs12722024 | NP_002112 | D | H | DH | possibly damaging |
| rs12722025 | NP_002112 | I | N | IN | possibly damaging |
| rs12722027 | NP_002112 | K | R | KR | benign            |
| rs12722028 | NP_002112 | R | W | RW | benign            |
| rs12722030 | NP_002112 | V | L | VL | benign            |
| rs12722032 | NP_002112 | P | L | PL | benign            |
| rs12722035 | NP_002112 | R | H | RH | benign            |
| rs12722039 | NP_002113 | V | M | VM | benign            |
| rs12722040 | NP_002113 | M | T | MT | benign            |
| rs12722042 | NP_002113 | D | G | DG | benign            |
| rs12722049 | NP_002113 | P | L | PL | benign            |
| rs12722051 | NP_002113 | Y | F | YF | benign            |
| rs12722054 | NP_002113 | R | K | RK | benign            |
| rs12722055 | NP_002113 | T | A | TA | benign            |
| rs12722057 | NP_002113 | R | W | RW | probably damaging |
| rs12722058 | NP_002113 | R | Q | RQ | benign            |
| rs12722061 | NP_002113 | E | Q | EQ | possibly damaging |
| rs12722063 | NP_002113 | E | D | ED | benign            |
| rs12722065 | NP_002113 | S | G | SG | benign            |
| rs12722070 | NP_002113 | F | L | FL | benign            |
| rs12722074 | NP_002113 | F | L | FL | probably damaging |
| rs12722087 | NP_002113 | I | L | IL | benign            |
| rs12722088 | NP_002113 | N | T | NT | probably damaging |
| rs12722090 | NP_002113 | T | I | TI | benign            |
| rs12722094 | NP_002113 | A | T | AT | benign            |
| rs12722094 | NP_064440 | A | T | AT | benign            |
| rs12722397 | NP_072049 | L | S | LS | benign            |
| rs12722398 | NP_072049 | E | Q | EQ | benign            |
| rs12722399 | NP_072049 | R | C | RC | benign            |
| rs12722400 | NP_072049 | Y | H | YH | benign            |
| rs12722401 | NP_072049 | D | N | DN | benign            |
| rs12722403 | NP_072049 | R | I | RI | probably damaging |
| rs12722405 | NP_072049 | R | S | RS | probably damaging |
| rs12722406 | NP_072049 | T | R | TR | benign            |
| rs12722407 | NP_072049 | V | I | VI | benign            |
| rs12722408 | NP_072049 | V | G | VG | benign            |
| rs12722409 | NP_072049 | A | D | AD | benign            |
| rs12722411 | NP_072049 | S | P | SP | benign            |
| rs12722412 | NP_072049 | S | Y | SY | benign            |
| rs12722416 | NP_072049 | G | A | GA | benign            |
| rs12722419 | NP_002116 | K | E | KE | benign            |
| rs12722420 | NP_002116 | K | M | KM | possibly damaging |
| rs12722421 | NP_002116 | R | C | RC | benign            |
| rs12722422 | NP_002116 | D | G | DG | possibly damaging |
| rs12722424 | NP_002116 | L | V | LV | benign            |
| rs12722426 | NP_002116 | Y | S | YS | benign            |

|            |           |   |   |    |                   |
|------------|-----------|---|---|----|-------------------|
| rs12722429 | NP_002116 | D | H | DH | benign            |
| rs12722430 | NP_002116 | D | G | DG | benign            |
| rs12722431 | NP_002116 | D | E | DE | benign            |
| rs12722432 | NP_002116 | R | G | RG | probably damaging |
| rs12722433 | NP_002116 | R | T | RT | benign            |
| rs12722435 | NP_002116 | A | P | AP | probably damaging |
| rs12722436 | NP_002116 | A | V | AV | benign            |
| rs12722437 | NP_002116 | Y | D | YD | probably damaging |
| rs12722438 | NP_002116 | Y | F | YF | benign            |
| rs12722442 | NP_002116 | V | A | VA | benign            |
| rs12722443 | NP_002116 | G | V | GV | benign            |
| rs12722445 | NP_002116 | S | G | SG | benign            |
| rs12722446 | NP_002116 | T | I | TI | benign            |
| rs12722452 | NP_002116 | V | F | VF | benign            |
| rs12722459 | NP_002116 | R | Q | RQ | benign            |
| rs12722467 | NP_002116 | V | I | VI | benign            |
| rs12722468 | NP_005507 | L | F | LF | benign            |
| rs12722469 | NP_005507 | L | P | LP | possibly damaging |
| rs12722471 | NP_005507 | G | R | GR | benign            |
| rs12722473 | NP_005507 | R | G | RG | probably damaging |
| rs12722474 | NP_002118 | T | S | TS | benign            |
| rs12722475 | NP_002118 | Q | R | QR | benign            |
| rs12722477 | NP_002118 | L | I | LI | benign            |
| rs12722481 | NP_002118 | F | S | FS | probably damaging |
| rs12722482 | NP_002118 | T | M | TM | benign            |
| rs12722712 | NP_000408 | I | T | IT | probably damaging |
| rs12722877 | NP_001843 | L | V | LV | benign            |
| rs12724099 | NP_005067 | F | L | FL | probably damaging |
| rs12724162 | NP_005798 | Q | L | QL | possibly damaging |
| rs12724163 | NP_005798 | Q | H | QH | benign            |
| rs12724229 | NP_000692 | T | P | TP | possibly damaging |
| rs12724404 | NP_036318 | L | M | LM | benign            |
| rs12724520 | NP_055672 | K | T | KT | possibly damaging |
| rs12724656 | NP_055672 | N | H | NH | benign            |
| rs12727564 | NP_787107 | F | L | FL | benign            |
| rs12727569 | NP_003893 | A | E | AE | possibly damaging |
| rs12727981 | XP_371352 | G | C | GC | probably damaging |
| rs12728354 | XP_497676 | E | G | EG | possibly damaging |
| rs12728605 | XP_378901 | W | R | WR | benign            |
| rs12728688 | NP_003829 | T | P | TP | benign            |
| rs12729110 | NP_002236 | V | G | VG | possibly damaging |
| rs12729157 | NP_872628 | I | T | IT | possibly damaging |
| rs12729157 | NP_079150 | I | T | IT | possibly damaging |
| rs12729294 | XP_375809 | G | V | GV | possibly damaging |
| rs12729317 | XP_375809 | G | C | GC | benign            |
| rs12729376 | XP_086186 | A | V | AV | benign            |

|            |           |   |   |    |                   |
|------------|-----------|---|---|----|-------------------|
| rs12729569 | XP_114735 | N | D | ND | possibly damaging |
| rs12730520 | XP_496437 | Q | H | QH | benign            |
| rs12730560 | XP_036299 | M | V | MV | benign            |
| rs12730914 | XP_375806 | L | M | LM | benign            |
| rs12730915 | XP_375806 | P | H | PH | probably damaging |
| rs12730965 | NP_079504 | A | T | AT | benign            |
| rs12731518 | NP_065840 | A | V | AV | benign            |
| rs12731961 | NP_006606 | R | W | RW | possibly damaging |
| rs12731981 | NP_005364 | V | M | VM | benign            |
| rs12732140 | NP_079504 | A | E | AE | benign            |
| rs12732168 | NP_001985 | S | N | SN | benign            |
| rs12733102 | NP_036519 | R | T | RT | possibly damaging |
| rs12733224 | NP_002284 | D | H | DH | possibly damaging |
| rs12733554 | XP_497745 | E | K | EK | benign            |
| rs12733746 | XP_046581 | V | G | VG | probably damaging |
| rs12734508 | XP_057040 | Q | R | QR | benign            |
| rs12734875 | NP_000769 | S | C | SC | benign            |
| rs12735475 | XP_497650 | Y | C | YC | probably damaging |
| rs12735494 | XP_089281 | S | R | SR | possibly damaging |
| rs12735670 | NP_997253 | H | R | HR | benign            |
| rs12735723 | NP_000300 | P | R | PR | probably damaging |
| rs12735796 | NP_036331 | Q | L | QL | possibly damaging |
| rs12736031 | NP_004714 | S | R | SR | possibly damaging |
| rs12736964 | NP_004689 | K | N | KN | benign            |
| rs12736998 | XP_371214 | P | L | PL | benign            |
| rs12737483 | XP_371227 | L | F | LF | benign            |
| rs12738021 | XP_375684 | R | T | RT | benign            |
| rs12738104 | NP_940905 | C | W | CW | probably damaging |
| rs12738235 | NP_004393 | R | K | RK | benign            |
| rs12739756 | NP_079355 | E | G | EG | possibly damaging |
| rs12739932 | NP_036331 | I | T | IT | possibly damaging |
| rs12740697 | NP_004412 | Q | R | QR | possibly damaging |
| rs12741211 | NP_036234 | P | L | PL | possibly damaging |
| rs12741265 | XP_375726 | E | D | ED | benign            |
| rs12741266 | XP_375726 | E | G | EG | possibly damaging |
| rs12742038 | NP_254275 | I | N | IN | probably damaging |
| rs12742082 | NP_940905 | K | N | KN | benign            |
| rs12742148 | NP_001026 | D | N | DN | benign            |
| rs12742169 | NP_000060 | H | L | HL | benign            |
| rs12742341 | NP_071440 | E | G | EG | benign            |
| rs12742363 | XP_497739 | S | P | SP | possibly damaging |
| rs12742561 | NP_787107 | L | F | LF | benign            |
| rs12742808 | NP_078930 | C | R | CR | benign            |
| rs12743012 | NP_055467 | A | P | AP | benign            |
| rs12743600 | NP_003180 | G | E | GE | possibly damaging |
| rs12744282 | NP_006675 | I | R | IR | possibly damaging |

|            |           |   |   |    |                   |
|------------|-----------|---|---|----|-------------------|
| rs12745008 | NP_065883 | G | S | GS | benign            |
| rs12745228 | XP_060305 | R | T | RT | probably damaging |
| rs12745355 | NP_057631 | E | A | EA | possibly damaging |
| rs12745355 | NP_057260 | E | A | EA | possibly damaging |
| rs12745364 | NP_057631 | N | D | ND | benign            |
| rs12745364 | NP_057260 | N | D | ND | benign            |
| rs12746154 | NP_056230 | G | S | GS | possibly damaging |
| rs12746359 | NP_006550 | S | C | SC | benign            |
| rs12746550 | NP_002915 | M | L | ML | possibly damaging |
| rs12746607 | NP_036331 | A | P | AP | benign            |
| rs12746751 | NP_004061 | P | L | PL | probably damaging |
| rs12747447 | NP_056165 | N | S | NS | possibly damaging |
| rs12748250 | NP_000219 | M | L | ML | benign            |
| rs12748336 | NP_003893 | I | K | IK | probably damaging |
| rs12748509 | NP_003893 | I | K | IK | probably damaging |
| rs12748810 | NP_002635 | V | I | VI | benign            |
| rs12749581 | NP_000245 | R | Q | RQ | benign            |
| rs12749726 | NP_006483 | P | A | PA | possibly damaging |
| rs12750081 | XP_048104 | T | I | TI | possibly damaging |
| rs12750174 | NP_443198 | S | L | SL | possibly damaging |
| rs12750253 | XP_048104 | D | E | DE | benign            |
| rs12750323 | XP_496406 | S | N | SN | benign            |
| rs12750400 | NP_058515 | S | L | SL | benign            |
| rs12750571 | XP_048104 | R | C | RC | possibly damaging |
| rs12750669 | XP_496382 | A | E | AE | benign            |
| rs12751234 | XP_046581 | S | C | SC | possibly damaging |
| rs12751770 | NP_077306 | L | M | LM | benign            |
| rs12752075 | NP_001985 | S | R | SR | benign            |
| rs12752091 | NP_001985 | L | M | LM | benign            |
| rs12752437 | NP_060156 | P | R | PR | probably damaging |
| rs12752655 | XP_375809 | A | V | AV | benign            |
| rs12752800 | XP_498755 | F | L | FL | benign            |
| rs12753516 | NP_003680 | E | D | ED | benign            |
| rs12753590 | XP_371254 | Y | S | YS | probably damaging |
| rs12753610 | NP_060156 | G | R | GR | probably damaging |
| rs12754808 | NP_061905 | T | S | TS | benign            |
| rs12754818 | XP_371262 | V | L | VL | benign            |
| rs12755972 | NP_061973 | M | L | ML | possibly damaging |
| rs12756115 | NP_064714 | S | A | SA | benign            |
| rs12756225 | XP_046531 | A | S | AS | benign            |
| rs12756321 | NP_006483 | P | A | PA | possibly damaging |
| rs12756586 | XP_048104 | H | D | HD | possibly damaging |
| rs12756767 | XP_015717 | G | D | GD | probably damaging |
| rs12757085 | NP_036537 | S | L | SL | possibly damaging |
| rs12757100 | NP_079355 | A | T | AT | benign            |
| rs12757156 | NP_067649 | D | N | DN | possibly damaging |



|            |           |   |   |    |                   |
|------------|-----------|---|---|----|-------------------|
| rs12757239 | XP_497739 | P | T | PT | possibly damaging |
| rs12757822 | NP_006675 | V | I | VI | benign            |
| rs12758250 | NP_079355 | A | G | AG | benign            |
| rs12758626 | XP_497699 | R | G | RG | benign            |
| rs12758862 | NP_006675 | Q | K | QK | benign            |
| rs12759032 | NP_055478 | V | G | VG | possibly damaging |
| rs12759923 | NP_000769 | N | S | NS | possibly damaging |
| rs12759971 | NP_002915 | T | I | TI | possibly damaging |
| rs12760019 | XP_497650 | P | S | PS | benign            |
| rs12760076 | NP_061973 | M | K | MK | probably damaging |
| rs12760148 | NP_065385 | S | F | SF | possibly damaging |
| rs12761754 | NP_009009 | P | L | PL | probably damaging |
| rs12762604 | NP_000689 | F | L | FL | benign            |
| rs12762880 | NP_065803 | E | V | EV | possibly damaging |
| rs12764004 | NP_055568 | I | V | IV | benign            |
| rs12764700 | XP_374831 | L | P | LP | possibly damaging |
| rs12765045 | XP_374831 | K | N | KN | benign            |
| rs12765383 | XP_374831 | P | H | PH | probably damaging |
| rs12765679 | NP_996744 | E | K | EK | benign            |
| rs12766451 | NP_005461 | T | I | TI | benign            |
| rs12766884 | NP_443723 | G | E | GE | benign            |
| rs12767060 | NP_065071 | V | L | VL | benign            |
| rs12767074 | NP_065071 | G | R | GR | probably damaging |
| rs12767255 | NP_036215 | L | I | LI | benign            |
| rs12767417 | NP_003884 | N | T | NT | possibly damaging |
| rs12767945 | NP_998815 | V | L | VL | benign            |
| rs12767945 | NP_849198 | V | L | VL | benign            |
| rs12767957 | NP_848930 | A | P | AP | benign            |
| rs12768730 | NP_444277 | E | K | EK | benign            |
| rs12768894 | NP_071932 | H | R | HR | probably damaging |
| rs12769293 | NP_443723 | T | A | TA | benign            |
| rs12769320 | NP_998815 | K | E | KE | benign            |
| rs12769320 | NP_849198 | K | E | KE | benign            |
| rs12770335 | NP_003892 | V | L | VL | benign            |
| rs12772293 | NP_057279 | V | M | VM | benign            |
| rs12773594 | NP_085128 | S | T | ST | benign            |
| rs12773807 | NP_003963 | F | I | FI | possibly damaging |
| rs12773843 | XP_291697 | C | Y | CY | probably damaging |
| rs12774070 | NP_542453 | L | M | LM | benign            |
| rs12774070 | NP_631894 | L | M | LM | benign            |
| rs12774988 | XP_370585 | R | W | RW | possibly damaging |
| rs12775148 | NP_055287 | S | P | SP | benign            |
| rs12775149 | XP_495824 | L | S | LS | benign            |
| rs12777740 | NP_002408 | R | H | RH | benign            |
| rs12777836 | NP_478129 | F | S | FS | possibly damaging |
| rs12779172 | NP_005727 | R | P | RP | probably damaging |

|            |           |   |   |    |                   |
|------------|-----------|---|---|----|-------------------|
| rs12779697 | NP_004239 | Q | E | QE | benign            |
| rs12780533 | NP_003165 | K | Q | KQ | benign            |
| rs12780533 | NP_068506 | K | Q | KQ | benign            |
| rs12780580 | NP_057253 | A | D | AD | benign            |
| rs12780970 | XP_495824 | N | K | NK | benign            |
| rs12781044 | NP_690875 | A | S | AS | benign            |
| rs12781044 | NP_997010 | A | S | AS | benign            |
| rs12781044 | NP_997011 | A | S | AS | benign            |
| rs12781044 | NP_997008 | A | S | AS | benign            |
| rs12781048 | NP_149091 | H | Q | HQ | benign            |
| rs12781122 | NP_079224 | K | R | KR | benign            |
| rs12781132 | XP_495824 | P | S | PS | benign            |
| rs12781609 | NP_775843 | N | S | NS | benign            |
| rs12782946 | NP_060487 | R | Q | RQ | benign            |
| rs12782963 | NP_057196 | A | D | AD | benign            |
| rs12784975 | NP_689522 | K | R | KR | benign            |
| rs12785832 | NP_060954 | V | G | VG | possibly damaging |
| rs12785840 | XP_166831 | I | T | IT | benign            |
| rs12786101 | XP_208522 | P | L | PL | probably damaging |
| rs12786651 | NP_005179 | L | H | LH | possibly damaging |
| rs12786746 | NP_061928 | S | P | SP | benign            |
| rs12786824 | XP_497281 | G | D | GD | possibly damaging |
| rs12786957 | NP_000042 | E | D | ED | benign            |
| rs12786960 | NP_000042 | H | P | HP | probably damaging |
| rs12787061 | NP_659454 | S | T | ST | benign            |
| rs12787255 | NP_061928 | S | F | SF | benign            |
| rs12787400 | XP_290540 | F | I | FI | benign            |
| rs12787462 | NP_060310 | R | Q | RQ | benign            |
| rs12787512 | NP_055972 | S | C | SC | benign            |
| rs12787525 | NP_005160 | L | V | LV | benign            |
| rs12788418 | NP_000042 | V | G | VG | possibly damaging |
| rs12788427 | NP_000042 | V | G | VG | possibly damaging |
| rs12788429 | NP_000042 | V | G | VG | possibly damaging |
| rs12788602 | NP_061928 | T | P | TP | benign            |
| rs12788990 | XP_166805 | I | V | IV | benign            |
| rs12789224 | NP_001413 | E | Q | EQ | benign            |
| rs12789224 | NP_938195 | E | Q | EQ | benign            |
| rs12789251 | NP_001413 | C | S | CS | benign            |
| rs12789251 | NP_938195 | C | S | CS | benign            |
| rs12789346 | NP_001024 | W | G | WG | probably damaging |
| rs12789379 | NP_006810 | P | T | PT | probably damaging |
| rs12789560 | NP_001413 | D | E | DE | benign            |
| rs12789560 | NP_938195 | D | E | DE | benign            |
| rs12789595 | NP_001413 | T | S | TS | benign            |
| rs12789595 | NP_938195 | T | S | TS | benign            |
| rs12789777 | NP_054786 | A | P | AP | benign            |

|            |              |   |   |    |                   |
|------------|--------------|---|---|----|-------------------|
| rs12790100 | NP_002222    | I | V | IV | benign            |
| rs12790359 | XP_166777    | L | F | LF | benign            |
| rs12790505 | XP_166878    | S | P | SP | possibly damaging |
| rs12790545 | NP_066288    | E | V | EV | possibly damaging |
| rs12790613 | NP_116262    | A | T | AT | benign            |
| rs12790933 | NP_060513    | V | G | VG | possibly damaging |
| rs12790963 | NP_060513    | V | G | VG | possibly damaging |
| rs12791318 | XP_370615    | H | R | HR | possibly damaging |
| rs12791713 | XP_497281    | V | A | VA | benign            |
| rs12791877 | XP_497281    | S | P | SP | benign            |
| rs12792033 | NP_149126    | D | Y | DY | probably damaging |
| rs12792033 | NP_079484    | D | Y | DY | probably damaging |
| rs12792040 | NP_620411    | R | C | RC | possibly damaging |
| rs12792184 | XP_372443    | S | L | SL | benign            |
| rs12792229 | NP_002415    | S | Y | SY | benign            |
| rs12792700 | NP_055159    | M | L | ML | benign            |
| rs12792752 | NP_149126    | I | N | IN | possibly damaging |
| rs12792752 | NP_079484    | I | N | IN | possibly damaging |
| rs12793222 | NP_932341    | R | Q | RQ | benign            |
| rs12793242 | XP_290540    | T | P | TP | benign            |
| rs12793348 | NP_056183    | I | V | IV | benign            |
| rs12793445 | NP_570899    | Q | H | QH | benign            |
| rs12793516 | NP_115604    | E | K | EK | benign            |
| rs12793600 | NP_665803    | Y | C | YC | probably damaging |
| rs12793957 | XP_089863    | I | L | IL | benign            |
| rs12794170 | XP_372413    | E | Q | EQ | benign            |
| rs12794318 | NP_055159    | M | K | MK | benign            |
| rs12794914 | XP_370652    | R | K | RK | benign            |
| rs12795414 | NP_079059    | I | R | IR | possibly damaging |
| rs12795426 | NP_079059    | V | A | VA | benign            |
| rs12795991 | NP_065079    | I | M | IM | benign            |
| rs12796044 | XP_166213    | R | P | RP | possibly damaging |
| rs12796489 | NP_644802    | A | S | AS | benign            |
| rs12796489 | NP_001742    | A | S | AS | benign            |
| rs12796681 | XP_372376    | L | M | LM | benign            |
| rs12796828 | XP_372376    | L | V | LV | benign            |
| rs12796846 | XP_372376    | L | M | LM | benign            |
| rs12797097 | NP_113659    | E | G | EG | possibly damaging |
| rs12797097 | NP_848537    | E | G | EG | possibly damaging |
| rs12797161 | NP_079059    | H | P | HP | probably damaging |
| rs12797438 | NP_056076    | P | L | PL | benign            |
| rs12797918 | NP_149126    | Y | F | YF | benign            |
| rs12797918 | NP_079484    | Y | F | YF | benign            |
| rs12798330 | NP_061901    | Y | C | YC | probably damaging |
| rs12798330 | NP_001001483 | Y | C | YC | probably damaging |
| rs12798361 | XP_372376    | L | Q | LQ | possibly damaging |

|            |              |   |   |    |                   |
|------------|--------------|---|---|----|-------------------|
| rs12798701 | NP_060496    | K | R | KR | benign            |
| rs12798733 | NP_057230    | V | G | VG | possibly damaging |
| rs12798852 | NP_060496    | F | L | FL | possibly damaging |
| rs12799188 | NP_003096    | T | I | TI | benign            |
| rs12799308 | NP_115604    | R | C | RC | probably damaging |
| rs12800450 | NP_653186    | G | W | GW | probably damaging |
| rs12800526 | XP_166877    | V | G | VG | possibly damaging |
| rs12800529 | XP_166877    | F | V | FV | possibly damaging |
| rs12800541 | XP_166877    | V | G | VG | possibly damaging |
| rs12800642 | XP_166868    | V | L | VL | benign            |
| rs12800722 | NP_115604    | I | K | IK | probably damaging |
| rs12800905 | XP_290502    | Q | R | QR | benign            |
| rs12800965 | NP_115604    | F | S | FS | probably damaging |
| rs12800974 | NP_009097    | T | P | TP | possibly damaging |
| rs12801000 | NP_203754    | S | P | SP | benign            |
| rs12801394 | NP_001001336 | N | D | ND | benign            |
| rs12801394 | NP_057313    | N | D | ND | benign            |
| rs12801696 | XP_170658    | A | S | AS | benign            |
| rs12801863 | NP_997313    | D | G | DG | benign            |
| rs12803046 | NP_940876    | A | T | AT | benign            |
| rs12803166 | XP_084529    | S | Y | SY | benign            |
| rs12803695 | XP_370652    | T | P | TP | possibly damaging |
| rs12804707 | NP_001409    | V | G | VG | possibly damaging |
| rs12805035 | NP_003381    | A | V | AV | benign            |
| rs12805508 | NP_056331    | R | S | RS | benign            |
| rs12805520 | NP_775827    | P | L | PL | probably damaging |
| rs12805648 | NP_940876    | V | E | VE | possibly damaging |
| rs12806196 | NP_006810    | Q | H | QH | possibly damaging |
| rs12806437 | XP_062285    | R | W | RW | benign            |
| rs12806587 | NP_005137    | R | M | RM | benign            |
| rs12806830 | NP_004967    | R | W | RW | probably damaging |
| rs12807051 | NP_004769    | M | L | ML | benign            |
| rs12807053 | NP_004769    | D | G | DG | possibly damaging |
| rs12807084 | XP_290540    | R | G | RG | benign            |
| rs12807209 | XP_290540    | N | K | NK | benign            |
| rs12807230 | XP_039515    | P | L | PL | probably damaging |
| rs12807537 | XP_039515    | D | Y | DY | probably damaging |
| rs12807697 | XP_208545    | K | N | KN | benign            |
| rs12807719 | NP_002416    | V | G | VG | benign            |
| rs12808005 | NP_001024    | H | P | HP | probably damaging |
| rs12809050 | NP_002171    | S | I | SI | benign            |
| rs12809294 | NP_000919    | V | A | VA | benign            |
| rs12809625 | NP_077000    | C | G | CG | probably damaging |
| rs12810443 | NP_005752    | Q | R | QR | benign            |
| rs12810628 | NP_000919    | T | A | TA | possibly damaging |
| rs12810661 | NP_835463    | R | K | RK | benign            |

|            |           |   |   |    |                   |
|------------|-----------|---|---|----|-------------------|
| rs12810922 | NP_004710 | C | W | CW | benign            |
| rs12811140 | NP_077000 | H | L | HL | probably damaging |
| rs12811227 | NP_009141 | K | N | KN | possibly damaging |
| rs12811532 | NP_000915 | N | I | NI | probably damaging |
| rs12811704 | XP_498535 | R | H | RH | benign            |
| rs12811737 | NP_000915 | T | P | TP | possibly damaging |
| rs12813507 | NP_071758 | G | C | GC | possibly damaging |
| rs12814488 | XP_037523 | S | L | SL | benign            |
| rs12815188 | NP_597705 | D | E | DE | benign            |
| rs12815421 | NP_443117 | G | A | GA | possibly damaging |
| rs12816297 | XP_495908 | P | H | PH | benign            |
| rs12816538 | NP_597705 | D | H | DH | benign            |
| rs12816566 | XP_062553 | M | K | MK | possibly damaging |
| rs12816729 | NP_597705 | E | Q | EQ | benign            |
| rs12817751 | XP_495908 | G | E | GE | probably damaging |
| rs12817909 | NP_006759 | K | I | KI | probably damaging |
| rs12818131 | XP_498535 | G | R | GR | possibly damaging |
| rs12818189 | XP_062553 | M | L | ML | benign            |
| rs12819160 | XP_370686 | E | D | ED | benign            |
| rs12819767 | NP_006178 | R | W | RW | possibly damaging |
| rs12819884 | NP_065685 | G | R | GR | possibly damaging |
| rs12820011 | NP_001635 | R | K | RK | benign            |
| rs12820175 | XP_044836 | S | I | SI | benign            |
| rs12820960 | NP_002471 | K | N | KN | benign            |
| rs12821616 | XP_044836 | V | G | VG | possibly damaging |
| rs12823207 | NP_060742 | V | G | VG | possibly damaging |
| rs12823260 | NP_075422 | F | L | FL | benign            |
| rs12823260 | NP_005362 | F | L | FL | possibly damaging |
| rs12823343 | NP_859075 | P | A | PA | possibly damaging |
| rs12823512 | XP_045423 | L | R | LR | possibly damaging |
| rs12823715 | XP_045423 | L | Q | LQ | possibly damaging |
| rs12823733 | XP_045423 | C | S | CS | probably damaging |
| rs12823883 | XP_045423 | A | T | AT | benign            |
| rs12824031 | XP_045423 | L | F | LF | benign            |
| rs12824115 | NP_004438 | R | K | RK | benign            |
| rs12824121 | XP_292093 | P | L | PL | benign            |
| rs12824194 | XP_045423 | T | I | TI | possibly damaging |
| rs12824208 | NP_078836 | L | I | LI | benign            |
| rs12824229 | XP_045423 | L | I | LI | benign            |
| rs12824289 | NP_079014 | R | K | RK | benign            |
| rs12824916 | NP_689803 | V | G | VG | possibly damaging |
| rs12825940 | NP_997321 | I | N | IN | benign            |
| rs12826853 | NP_000280 | D | V | DV | benign            |
| rs12826863 | NP_061156 | A | P | AP | benign            |
| rs12826960 | NP_001937 | N | K | NK | possibly damaging |
| rs12827141 | NP_003556 | P | L | PL | probably damaging |

|            |           |   |   |    |                   |
|------------|-----------|---|---|----|-------------------|
| rs12827345 | NP_005430 | N | T | NT | possibly damaging |
| rs12828016 | NP_061852 | I | M | IM | possibly damaging |
| rs12828446 | NP_000280 | D | E | DE | benign            |
| rs12828557 | NP_001937 | N | I | NI | probably damaging |
| rs12828701 | NP_004364 | E | D | ED | benign            |
| rs12829975 | NP_004438 | D | A | DA | probably damaging |
| rs12831803 | NP_076417 | I | V | IV | benign            |
| rs12832273 | XP_373370 | E | D | ED | benign            |
| rs12833263 | XP_208080 | N | S | NS | benign            |
| rs12833276 | NP_004475 | E | K | EK | benign            |
| rs12833292 | NP_004475 | V | L | VL | benign            |
| rs12833456 | NP_542785 | Y | C | YC | benign            |
| rs12833635 | NP_073721 | A | T | AT | benign            |
| rs12833635 | NP_003942 | A | T | AT | benign            |
| rs12833808 | NP_077308 | Q | H | QH | possibly damaging |
| rs12834202 | NP_076423 | F | I | FI | probably damaging |
| rs12835062 | NP_775965 | E | Q | EQ | benign            |
| rs12836335 | NP_963893 | N | T | NT | benign            |
| rs12836817 | NP_001551 | G | A | GA | benign            |
| rs12836827 | NP_001551 | A | P | AP | benign            |
| rs12837393 | NP_068555 | P | S | PS | possibly damaging |
| rs12837493 | XP_293401 | I | S | IS | benign            |
| rs12838002 | NP_002538 | E | D | ED | benign            |
| rs12838505 | NP_659489 | N | T | NT | benign            |
| rs12838616 | NP_005174 | F | V | FV | possibly damaging |
| rs12838667 | NP_009199 | E | G | EG | possibly damaging |
| rs12838945 | NP_005638 | D | V | DV | probably damaging |
| rs12839101 | NP_005174 | S | F | SF | benign            |
| rs12839241 | NP_995321 | S | F | SF | benign            |
| rs12840082 | NP_004220 | T | P | TP | benign            |
| rs12840135 | NP_001551 | E | V | EV | possibly damaging |
| rs12841023 | NP_002040 | Q | H | QH | benign            |
| rs12841207 | NP_056234 | R | P | RP | possibly damaging |
| rs12841259 | XP_293380 | T | A | TA | benign            |
| rs12841518 | NP_003602 | E | D | ED | benign            |
| rs12842195 | NP_003679 | D | Y | DY | probably damaging |
| rs12842916 | NP_997202 | A | V | AV | benign            |
| rs12843151 | NP_444511 | Q | H | QH | possibly damaging |
| rs12843893 | XP_497127 | A | T | AT | benign            |
| rs12844831 | NP_055742 | L | V | LV | benign            |
| rs12844886 | NP_055742 | K | E | KE | benign            |
| rs12844887 | NP_055742 | K | I | KI | possibly damaging |
| rs12845209 | NP_055742 | E | K | EK | benign            |
| rs12845402 | NP_055742 | R | K | RK | benign            |
| rs12845530 | XP_372226 | D | N | DN | benign            |
| rs12845698 | NP_851829 | M | L | ML | benign            |

|            |           |   |   |    |                   |
|------------|-----------|---|---|----|-------------------|
| rs12845698 | NP_851831 | M | L | ML | benign            |
| rs12845698 | NP_851828 | M | L | ML | possibly damaging |
| rs12845698 | NP_851830 | M | L | ML | possibly damaging |
| rs12845773 | NP_000889 | T | P | TP | benign            |
| rs12845783 | NP_000889 | R | S | RS | probably damaging |
| rs12846637 | NP_055742 | N | K | NK | benign            |
| rs12846895 | NP_073736 | V | A | VA | benign            |
| rs12846895 | NP_982300 | V | A | VA | benign            |
| rs12846895 | NP_982301 | V | A | VA | benign            |
| rs12846895 | NP_982302 | V | A | VA | benign            |
| rs12846895 | NP_982299 | V | A | VA | benign            |
| rs12846900 | NP_073736 | L | P | LP | possibly damaging |
| rs12846900 | NP_982300 | L | P | LP | possibly damaging |
| rs12846900 | NP_982301 | L | P | LP | possibly damaging |
| rs12846900 | NP_982302 | L | P | LP | possibly damaging |
| rs12846900 | NP_982299 | L | P | LP | possibly damaging |
| rs12847788 | NP_004484 | V | G | VG | probably damaging |
| rs12847967 | NP_004717 | S | Y | SY | possibly damaging |
| rs12849115 | NP_775965 | V | E | VE | possibly damaging |
| rs12849411 | NP_006508 | I | L | IL | benign            |
| rs12849479 | NP_006508 | S | N | SN | benign            |
| rs12849510 | NP_438112 | A | D | AD | benign            |
| rs12849510 | NP_036348 | A | D | AD | benign            |
| rs12849757 | NP_006508 | S | N | SN | benign            |
| rs12851517 | NP_055104 | T | I | TI | benign            |
| rs12851704 | NP_005651 | N | T | NT | possibly damaging |
| rs12851705 | XP_498374 | I | T | IT | benign            |
| rs12851740 | XP_291326 | V | G | VG | benign            |
| rs12851744 | NP_078815 | Y | H | YH | possibly damaging |
| rs12851763 | XP_291326 | I | T | IT | benign            |
| rs12851871 | XP_379699 | L | F | LF | benign            |
| rs12851879 | XP_498374 | D | Y | DY | benign            |
| rs12851945 | NP_542199 | T | P | TP | benign            |
| rs12851945 | NP_075386 | T | P | TP | benign            |
| rs12852163 | NP_006297 | K | N | KN | possibly damaging |
| rs12852199 | NP_036410 | S | I | SI | possibly damaging |
| rs12852225 | NP_036410 | G | R | GR | probably damaging |
| rs12852335 | XP_291326 | C | W | CW | probably damaging |
| rs12852634 | NP_055315 | N | T | NT | possibly damaging |
| rs12853266 | NP_002285 | G | W | GW | possibly damaging |
| rs12853266 | NP_054701 | G | W | GW | probably damaging |
| rs12853799 | XP_291326 | I | F | IF | benign            |
| rs12854479 | NP_055104 | I | S | IS | benign            |
| rs12854580 | NP_055104 | L | R | LR | benign            |
| rs12854697 | XP_373373 | T | P | TP | benign            |
| rs12855582 | NP_036410 | S | R | SR | possibly damaging |

|            |           |   |   |    |                   |
|------------|-----------|---|---|----|-------------------|
| rs12855643 | XP_373373 | A | P | AP | benign            |
| rs12856307 | NP_002435 | A | D | AD | possibly damaging |
| rs12857550 | NP_004303 | S | C | SC | probably damaging |
| rs12857859 | XP_373373 | Y | H | YH | benign            |
| rs12858248 | NP_005923 | R | H | RH | benign            |
| rs12858959 | NP_002016 | L | M | LM | benign            |
| rs12859906 | NP_037403 | L | M | LM | benign            |
| rs12859908 | NP_037403 | A | V | AV | benign            |
| rs12860105 | NP_689790 | S | F | SF | benign            |
| rs12860222 | XP_498387 | V | G | VG | possibly damaging |
| rs12860296 | NP_006297 | L | V | LV | benign            |
| rs12860599 | NP_006297 | R | G | RG | possibly damaging |
| rs12860727 | NP_001560 | R | G | RG | possibly damaging |
| rs12862951 | XP_377034 | R | Q | RQ | benign            |
| rs12863544 | XP_377034 | R | W | RW | possibly damaging |
| rs12863734 | NP_115605 | L | F | LF | benign            |
| rs12863903 | NP_064506 | T | A | TA | benign            |
| rs12865456 | NP_002006 | N | T | NT | possibly damaging |
| rs12865742 | XP_495960 | S | T | ST | benign            |
| rs12865940 | XP_372494 | Q | E | QE | benign            |
| rs12865990 | XP_497370 | T | I | TI | possibly damaging |
| rs12866274 | NP_001667 | R | Q | RQ | benign            |
| rs12866960 | NP_037370 | I | K | IK | possibly damaging |
| rs12867263 | NP_001259 | E | D | ED | benign            |
| rs12867400 | NP_055387 | A | V | AV | benign            |
| rs12868504 | NP_055387 | E | D | ED | benign            |
| rs12868620 | NP_055387 | Q | H | QH | benign            |
| rs12868653 | NP_055387 | Q | H | QH | possibly damaging |
| rs12868723 | NP_006428 | H | Q | HQ | possibly damaging |
| rs12871608 | NP_054808 | S | P | SP | possibly damaging |
| rs12872971 | NP_005993 | T | P | TP | possibly damaging |
| rs12873221 | NP_060296 | Q | H | QH | possibly damaging |
| rs12873478 | NP_060296 | S | L | SL | benign            |
| rs12874207 | XP_166270 | P | H | PH | probably damaging |
| rs12875881 | NP_006695 | N | S | NS | benign            |
| rs12875900 | NP_006695 | K | T | KT | possibly damaging |
| rs12876018 | NP_064506 | L | M | LM | benign            |
| rs12876270 | NP_758961 | N | K | NK | possibly damaging |
| rs12876618 | NP_758961 | S | F | SF | possibly damaging |
| rs12877501 | NP_001837 | G | S | GS | benign            |
| rs12878894 | NP_005104 | Q | H | QH | possibly damaging |
| rs12879377 | XP_031104 | V | M | VM | benign            |
| rs12879447 | XP_372527 | V | D | VD | possibly damaging |
| rs12879993 | NP_008970 | K | N | KN | possibly damaging |
| rs12880115 | NP_008970 | T | P | TP | possibly damaging |
| rs12880583 | NP_009041 | H | R | HR | possibly damaging |



|            |           |   |   |    |                   |
|------------|-----------|---|---|----|-------------------|
| rs12881596 | NP_110418 | G | A | GA | benign            |
| rs12881616 | NP_005154 | E | G | EG | probably damaging |
| rs12881649 | NP_004187 | C | W | CW | probably damaging |
| rs12881815 | NP_878918 | E | K | EK | benign            |
| rs12881869 | NP_006566 | A | T | AT | benign            |
| rs12881869 | NP_942089 | A | T | AT | benign            |
| rs12882191 | NP_057434 | P | Q | PQ | possibly damaging |
| rs12882191 | NP_891989 | P | Q | PQ | possibly damaging |
| rs12882191 | NP_891990 | P | Q | PQ | possibly damaging |
| rs12882191 | NP_891991 | P | Q | PQ | possibly damaging |
| rs12882191 | NP_065972 | P | Q | PQ | probably damaging |
| rs12883454 | NP_848701 | L | V | LV | possibly damaging |
| rs12883454 | NP_848702 | L | V | LV | possibly damaging |
| rs12883454 | NP_002710 | L | V | LV | possibly damaging |
| rs12883454 | NP_848703 | L | V | LV | possibly damaging |
| rs12883471 | NP_848701 | V | G | VG | possibly damaging |
| rs12883471 | NP_848702 | V | G | VG | possibly damaging |
| rs12883471 | NP_002710 | V | G | VG | probably damaging |
| rs12883471 | NP_848703 | V | G | VG | probably damaging |
| rs12884523 | NP_004230 | D | A | DA | probably damaging |
| rs12884638 | NP_056371 | P | T | PT | possibly damaging |
| rs12885309 | NP_006168 | E | D | ED | benign            |
| rs12885558 | NP_075049 | A | V | AV | benign            |
| rs12885558 | NP_612808 | A | V | AV | benign            |
| rs12885887 | NP_006168 | L | P | LP | possibly damaging |
| rs12885908 | NP_037514 | D | A | DA | possibly damaging |
| rs12886014 | NP_078772 | P | S | PS | probably damaging |
| rs12886088 | NP_009041 | R | Q | RQ | benign            |
| rs12887018 | NP_055394 | F | L | FL | benign            |
| rs12888595 | NP_851808 | G | C | GC | possibly damaging |
| rs12888595 | NP_851819 | G | C | GC | possibly damaging |
| rs12888595 | NP_851825 | G | C | GC | possibly damaging |
| rs12888595 | NP_653175 | G | C | GC | possibly damaging |
| rs12889267 | XP_370737 | K | E | KE | benign            |
| rs12889670 | XP_085175 | L | F | LF | benign            |
| rs12889688 | NP_861535 | S | N | SN | benign            |
| rs12890136 | NP_075049 | Q | H | QH | benign            |
| rs12890136 | NP_612808 | Q | H | QH | benign            |
| rs12890370 | NP_006168 | E | A | EA | benign            |
| rs12890730 | XP_375105 | S | N | SN | benign            |
| rs12890759 | NP_002733 | I | S | IS | probably damaging |
| rs12891009 | XP_090885 | H | Y | HY | probably damaging |
| rs12891553 | XP_063315 | I | T | IT | possibly damaging |
| rs12892121 | NP_002733 | Y | F | YF | possibly damaging |
| rs12894400 | NP_976054 | V | A | VA | benign            |
| rs12894425 | NP_976054 | W | G | WG | probably damaging |

|            |           |   |   |    |                   |
|------------|-----------|---|---|----|-------------------|
| rs12894435 | NP_976054 | L | H | LH | possibly damaging |
| rs12895348 | NP_079228 | A | T | AT | benign            |
| rs12895357 | NP_109376 | G | R | GR | benign            |
| rs12895357 | NP_004984 | G | R | GR | benign            |
| rs12896018 | NP_003291 | Q | R | QR | benign            |
| rs12896018 | NP_663777 | Q | R | QR | benign            |
| rs12896018 | NP_663778 | Q | R | QR | benign            |
| rs12896533 | XP_497390 | F | L | FL | benign            |
| rs12896588 | NP_109376 | K | Q | KQ | benign            |
| rs12896588 | NP_004984 | K | Q | KQ | benign            |
| rs12897422 | NP_536806 | S | F | SF | possibly damaging |
| rs12898266 | XP_496045 | L | P | LP | benign            |
| rs12898290 | NP_002411 | H | Q | HQ | benign            |
| rs12898412 | XP_496045 | L | P | LP | benign            |
| rs12898412 | XP_496034 | P | L | PL | benign            |
| rs12899798 | NP_000737 | W | G | WG | probably damaging |
| rs12899901 | NP_055977 | E | V | EV | possibly damaging |
| rs12900317 | XP_372589 | D | H | DH | probably damaging |
| rs12900702 | NP_057097 | A | G | AG | benign            |
| rs12900729 | XP_370867 | G | A | GA | benign            |
| rs12900805 | NP_940927 | G | R | GR | benign            |
| rs12900993 | XP_370867 | A | V | AV | benign            |
| rs12901012 | XP_042833 | Q | K | QK | possibly damaging |
| rs12901193 | XP_042833 | D | G | DG | possibly damaging |
| rs12901321 | XP_042833 | D | E | DE | benign            |
| rs12901426 | XP_042833 | A | T | AT | benign            |
| rs12901843 | XP_370867 | K | I | KI | benign            |
| rs12902253 | NP_079413 | L | V | LV | benign            |
| rs12902977 | NP_079516 | D | A | DA | possibly damaging |
| rs12903022 | NP_005735 | E | D | ED | benign            |
| rs12904585 | XP_042833 | S | C | SC | benign            |
| rs12905661 | NP_877435 | Y | H | YH | possibly damaging |
| rs12905777 | NP_877435 | E | Q | EQ | benign            |
| rs12906187 | XP_372589 | D | E | DE | benign            |
| rs12907128 | NP_004875 | L | V | LV | benign            |
| rs12907196 | NP_078781 | L | F | LF | benign            |
| rs12907567 | NP_060154 | V | M | VM | benign            |
| rs12908445 | NP_620417 | S | N | SN | benign            |
| rs12908846 | NP_689810 | L | F | LF | benign            |
| rs12909704 | XP_370878 | R | K | RK | benign            |
| rs12910495 | NP_919271 | T | I | TI | benign            |
| rs12910758 | NP_919271 | E | A | EA | benign            |
| rs12910884 | NP_919271 | V | A | VA | benign            |
| rs12911192 | NP_955445 | Y | C | YC | benign            |
| rs12911192 | NP_955446 | Y | C | YC | benign            |
| rs12911192 | NP_003972 | Y | C | YC | benign            |

|            |           |   |   |    |                   |
|------------|-----------|---|---|----|-------------------|
| rs12911366 | XP_497472 | A | E | AE | benign            |
| rs12911457 | NP_997205 | Y | C | YC | benign            |
| rs12911600 | NP_997205 | T | S | TS | benign            |
| rs12911738 | NP_733468 | T | A | TA | benign            |
| rs12911738 | NP_653091 | T | A | TA | benign            |
| rs12911745 | NP_997205 | R | C | RC | benign            |
| rs12912620 | XP_496092 | A | T | AT | benign            |
| rs12912744 | NP_689668 | G | S | GS | benign            |
| rs12912892 | NP_997205 | L | P | LP | probably damaging |
| rs12912898 | NP_997205 | V | G | VG | probably damaging |
| rs12912899 | NP_009131 | D | A | DA | possibly damaging |
| rs12912899 | NP_006729 | D | A | DA | possibly damaging |
| rs12913689 | NP_940844 | S | C | SC | benign            |
| rs12913767 | NP_005698 | A | D | AD | benign            |
| rs12913789 | XP_370826 | P | T | PT | benign            |
| rs12913973 | NP_060142 | I | V | IV | benign            |
| rs12914008 | NP_000741 | T | I | TI | benign            |
| rs12914257 | NP_056292 | K | N | KN | benign            |
| rs12914574 | NP_061947 | E | K | EK | benign            |
| rs12914632 | NP_055150 | E | K | EK | benign            |
| rs12914807 | NP_055150 | E | K | EK | benign            |
| rs12915007 | NP_060618 | I | V | IV | benign            |
| rs12915033 | NP_060663 | S | N | SN | benign            |
| rs12915617 | XP_370826 | E | V | EV | possibly damaging |
| rs12915981 | XP_035527 | V | I | VI | benign            |
| rs12916804 | NP_653166 | A | S | AS | benign            |
| rs12917031 | NP_065711 | V | E | VE | possibly damaging |
| rs12917794 | XP_497494 | C | S | CS | benign            |
| rs12917808 | XP_497494 | C | F | CF | probably damaging |
| rs12918374 | XP_497494 | C | R | CR | possibly damaging |
| rs12918397 | XP_497494 | S | P | SP | benign            |
| rs12918952 | NP_061030 | T | A | TA | benign            |
| rs12918964 | NP_000284 | R | W | RW | probably damaging |
| rs12919802 | NP_001786 | P | L | PL | probably damaging |
| rs12919857 | NP_078795 | A | D | AD | benign            |
| rs12919890 | NP_078795 | P | L | PL | probably damaging |
| rs12919898 | NP_078795 | P | L | PL | benign            |
| rs12920740 | NP_060676 | D | E | DE | benign            |
| rs12921440 | NP_689865 | V | A | VA | benign            |
| rs12921643 | NP_060358 | K | T | KT | benign            |
| rs12921797 | NP_955399 | E | D | ED | benign            |
| rs12921797 | NP_003110 | E | D | ED | benign            |
| rs12921943 | NP_005623 | L | F | LF | benign            |
| rs12922324 | NP_008816 | V | G | VG | possibly damaging |
| rs12922687 | NP_008816 | S | L | SL | benign            |
| rs12923155 | XP_496142 | I | V | IV | benign            |

|            |           |   |   |    |                   |
|------------|-----------|---|---|----|-------------------|
| rs12923676 | NP_775322 | E | K | EK | benign            |
| rs12923964 | NP_065837 | V | M | VM | benign            |
| rs12924551 | NP_060009 | R | C | RC | probably damaging |
| rs12925313 | NP_060676 | D | V | DV | probably damaging |
| rs12925838 | NP_004599 | P | S | PS | possibly damaging |
| rs12925838 | NP_542936 | P | S | PS | probably damaging |
| rs12925839 | NP_004599 | S | F | SF | possibly damaging |
| rs12925839 | NP_542936 | S | F | SF | possibly damaging |
| rs12925936 | NP_004599 | H | Y | HY | benign            |
| rs12925936 | NP_542936 | H | Y | HY | benign            |
| rs12925966 | NP_071736 | L | Q | LQ | benign            |
| rs12926089 | NP_001278 | V | M | VM | benign            |
| rs12926670 | NP_570896 | G | D | GD | probably damaging |
| rs12926670 | NP_006741 | G | D | GD | probably damaging |
| rs12926675 | NP_570896 | G | D | GD | probably damaging |
| rs12926675 | NP_006741 | G | D | GD | probably damaging |
| rs12926687 | NP_570896 | M | I | MI | probably damaging |
| rs12926687 | NP_006741 | M | I | MI | probably damaging |
| rs12927101 | XP_496142 | V | A | VA | benign            |
| rs12927146 | NP_060009 | R | K | RK | benign            |
| rs12927175 | NP_060009 | A | P | AP | benign            |
| rs12927214 | NP_001288 | V | A | VA | benign            |
| rs12927338 | NP_000287 | L | I | LI | benign            |
| rs12928112 | NP_002987 | P | H | PH | probably damaging |
| rs12928117 | NP_002987 | A | D | AD | benign            |
| rs12928508 | NP_000878 | A | T | AT | benign            |
| rs12928528 | NP_963892 | H | D | HD | benign            |
| rs12928528 | NP_958802 | H | D | HD | probably damaging |
| rs12928616 | NP_005227 | S | F | SF | possibly damaging |
| rs12928650 | NP_005227 | S | F | SF | possibly damaging |
| rs12929250 | NP_689550 | P | S | PS | possibly damaging |
| rs12929546 | NP_060009 | I | V | IV | benign            |
| rs12929925 | NP_003214 | S | F | SF | benign            |
| rs12929933 | NP_003214 | P | A | PA | possibly damaging |
| rs12931009 | NP_003214 | A | T | AT | benign            |
| rs12931217 | NP_877417 | T | A | TA | benign            |
| rs12931227 | NP_877417 | M | V | MV | benign            |
| rs12931472 | NP_001162 | V | A | VA | benign            |
| rs12931481 | XP_290684 | S | G | SG | benign            |
| rs12931536 | NP_005322 | L | M | LM | probably damaging |
| rs12932087 | NP_060358 | R | K | RK | benign            |
| rs12932227 | NP_079410 | K | R | KR | benign            |
| rs12932917 | NP_005227 | C | G | CG | probably damaging |
| rs12933084 | NP_067020 | K | R | KR | benign            |
| rs12933442 | NP_057109 | W | G | WG | probably damaging |
| rs12933806 | NP_877417 | V | I | VI | benign            |

|            |           |   |   |    |                   |
|------------|-----------|---|---|----|-------------------|
| rs12933808 | NP_207837 | R | Q | RQ | benign            |
| rs12934922 | NP_059125 | R | S | RS | benign            |
| rs12934924 | XP_497494 | R | G | RG | possibly damaging |
| rs12934925 | XP_497494 | P | L | PL | probably damaging |
| rs12935069 | NP_149989 | W | R | WR | probably damaging |
| rs12935394 | NP_620685 | A | S | AS | benign            |
| rs12935394 | NP_955387 | A | S | AS | benign            |
| rs12935435 | NP_005322 | A | T | AT | probably damaging |
| rs12935572 | XP_497494 | H | Q | HQ | benign            |
| rs12936033 | NP_005043 | F | L | FL | possibly damaging |
| rs12936785 | XP_375443 | D | E | DE | benign            |
| rs12937241 | NP_068831 | M | L | ML | benign            |
| rs12937447 | NP_060427 | A | G | AG | benign            |
| rs12937495 | NP_002607 | V | I | VI | benign            |
| rs12937519 | NP_004129 | A | V | AV | benign            |
| rs12937557 | NP_073596 | R | H | RH | possibly damaging |
| rs12938245 | NP_058519 | H | Y | HY | possibly damaging |
| rs12939811 | NP_002135 | Q | H | QH | possibly damaging |
| rs12939997 | NP_036505 | M | V | MV | possibly damaging |
| rs12941185 | NP_938191 | V | F | VF | benign            |
| rs12941185 | NP_938406 | V | F | VF | benign            |
| rs12941185 | NP_061496 | V | F | VF | benign            |
| rs12941185 | NP_938190 | V | F | VF | possibly damaging |
| rs12941185 | NP_938192 | V | F | VF | possibly damaging |
| rs12941185 | NP_938193 | V | F | VF | possibly damaging |
| rs12941185 | NP_938194 | V | F | VF | possibly damaging |
| rs12941185 | NP_938196 | V | F | VF | possibly damaging |
| rs12941185 | NP_938197 | V | F | VF | possibly damaging |
| rs12941185 | NP_938198 | V | F | VF | possibly damaging |
| rs12941185 | NP_938199 | V | F | VF | possibly damaging |
| rs12941185 | NP_938200 | V | F | VF | possibly damaging |
| rs12941185 | NP_938201 | V | F | VF | possibly damaging |
| rs12941185 | NP_938202 | V | F | VF | possibly damaging |
| rs12941197 | NP_002461 | R | C | RC | probably damaging |
| rs12941376 | NP_000277 | L | I | LI | benign            |
| rs12941595 | XP_290737 | Q | H | QH | benign            |
| rs12941739 | NP_067036 | E | A | EA | possibly damaging |
| rs12942334 | XP_375387 | P | T | PT | possibly damaging |
| rs12942581 | XP_375387 | P | L | PL | probably damaging |
| rs12942684 | NP_006302 | D | A | DA | probably damaging |
| rs12943507 | NP_055410 | F | L | FL | benign            |
| rs12943824 | NP_114163 | C | W | CW | possibly damaging |
| rs12943899 | NP_068370 | L | I | LI | benign            |
| rs12944088 | XP_290768 | H | R | HR | probably damaging |
| rs12944151 | NP_002728 | Q | H | QH | benign            |
| rs12944167 | NP_473363 | P | T | PT | benign            |

|            |           |   |   |    |                   |
|------------|-----------|---|---|----|-------------------|
| rs12944167 | NP_004278 | P | T | PT | benign            |
| rs12944187 | NP_056034 | A | D | AD | possibly damaging |
| rs12944305 | NP_061886 | L | F | LF | benign            |
| rs12944385 | XP_290768 | K | E | KE | benign            |
| rs12944815 | NP_066271 | D | N | DN | benign            |
| rs12944815 | NP_072170 | D | N | DN | benign            |
| rs12945245 | NP_009178 | T | S | TS | benign            |
| rs12945245 | NP_542117 | T | S | TS | benign            |
| rs12945569 | NP_055410 | E | K | EK | benign            |
| rs12945784 | NP_061889 | C | Y | CY | benign            |
| rs12946178 | NP_004095 | E | K | EK | benign            |
| rs12946189 | NP_060512 | S | P | SP | benign            |
| rs12946486 | NP_009230 | K | Q | KQ | benign            |
| rs12946486 | NP_009231 | K | Q | KQ | benign            |
| rs12946486 | NP_009232 | K | Q | KQ | benign            |
| rs12946486 | NP_009233 | K | Q | KQ | benign            |
| rs12946486 | NP_009228 | K | Q | KQ | benign            |
| rs12946793 | NP_061889 | W | R | WR | probably damaging |
| rs12946860 | NP_055410 | Y | N | YN | probably damaging |
| rs12946879 | NP_005164 | E | D | ED | possibly damaging |
| rs12946879 | NP_777613 | E | D | ED | possibly damaging |
| rs12946879 | NP_777614 | E | D | ED | possibly damaging |
| rs12946879 | NP_777616 | E | D | ED | possibly damaging |
| rs12946879 | NP_777617 | E | D | ED | possibly damaging |
| rs12946879 | NP_777618 | E | D | ED | possibly damaging |
| rs12946879 | NP_777615 | E | D | ED | possibly damaging |
| rs12947131 | NP_115517 | E | K | EK | benign            |
| rs12947398 | NP_114432 | S | Y | SY | benign            |
| rs12947790 | NP_000325 | V | G | VG | probably damaging |
| rs12947820 | NP_775749 | T | P | TP | benign            |
| rs12947985 | XP_064265 | V | L | VL | benign            |
| rs12948207 | NP_788276 | L | I | LI | benign            |
| rs12948870 | NP_005524 | Q | E | QE | benign            |
| rs12948912 | NP_775749 | A | V | AV | benign            |
| rs12949256 | XP_371057 | A | T | AT | benign            |
| rs12949680 | NP_060003 | A | T | AT | benign            |
| rs12950108 | XP_375387 | K | E | KE | benign            |
| rs12950401 | NP_115517 | H | L | HL | probably damaging |
| rs12950413 | NP_115517 | E | D | ED | benign            |
| rs12950537 | NP_002135 | Y | H | YH | possibly damaging |
| rs12951331 | NP_057066 | A | S | AS | benign            |
| rs12951399 | NP_853512 | S | L | SL | possibly damaging |
| rs12951415 | NP_115517 | K | T | KT | possibly damaging |
| rs12951436 | NP_940904 | G | R | GR | probably damaging |
| rs12951650 | NP_001662 | Q | H | QH | benign            |
| rs12952106 | NP_060029 | A | T | AT | benign            |

|            |           |   |   |    |                   |
|------------|-----------|---|---|----|-------------------|
| rs12952305 | NP_061937 | L | M | LM | benign            |
| rs12952415 | NP_060874 | C | G | CG | probably damaging |
| rs12952951 | NP_005112 | P | T | PT | probably damaging |
| rs12952995 | NP_653282 | T | P | TP | benign            |
| rs12953840 | NP_115536 | Y | C | YC | probably damaging |
| rs12953909 | NP_008850 | E | K | EK | benign            |
| rs12954997 | NP_579802 | K | R | KR | benign            |
| rs12954997 | NP_542164 | K | R | KR | benign            |
| rs12955426 | NP_057710 | E | D | ED | benign            |
| rs12956068 | NP_775901 | D | A | DA | possibly damaging |
| rs12956274 | NP_055029 | R | Q | RQ | benign            |
| rs12956303 | XP_113971 | L | H | LH | possibly damaging |
| rs12957558 | XP_497598 | V | L | VL | benign            |
| rs12957725 | XP_113971 | Q | R | QR | benign            |
| rs12960414 | XP_035405 | S | I | SI | benign            |
| rs12961512 | XP_497598 | T | I | TI | benign            |
| rs12961939 | NP_005550 | S | A | SA | benign            |
| rs12962228 | XP_497583 | S | P | SP | probably damaging |
| rs12963653 | XP_290809 | N | S | NS | benign            |
| rs12964615 | NP_694821 | D | E | DE | benign            |
| rs12964615 | NP_620552 | D | E | DE | benign            |
| rs12964615 | NP_620416 | D | E | DE | benign            |
| rs12964750 | NP_694821 | R | Q | RQ | possibly damaging |
| rs12964750 | NP_620552 | R | Q | RQ | possibly damaging |
| rs12964750 | NP_620416 | R | Q | RQ | possibly damaging |
| rs12965824 | NP_694821 | V | I | VI | benign            |
| rs12965824 | NP_620416 | V | I | VI | benign            |
| rs12966934 | NP_443179 | T | P | TP | benign            |
| rs12968116 | NP_005594 | R | Q | RQ | possibly damaging |
| rs12968145 | NP_056092 | D | Y | DY | probably damaging |
| rs12970198 | NP_536722 | H | Y | HY | benign            |
| rs12970605 | NP_057710 | T | P | TP | benign            |
| rs12970790 | NP_005777 | C | S | CS | benign            |
| rs12971220 | XP_497598 | P | L | PL | probably damaging |
| rs12971308 | XP_059051 | P | T | PT | benign            |
| rs12971466 | XP_371165 | S | F | SF | benign            |
| rs12971727 | XP_498425 | P | S | PS | benign            |
| rs12971727 | NP_037421 | P | S | PS | benign            |
| rs12971943 | XP_371165 | A | S | AS | benign            |
| rs12971947 | XP_371165 | K | N | KN | benign            |
| rs12971985 | NP_597730 | G | E | GE | benign            |
| rs12972277 | NP_113605 | A | D | AD | possibly damaging |
| rs12972670 | XP_372712 | M | T | MT | benign            |
| rs12972780 | XP_058964 | F | L | FL | benign            |
| rs12972830 | NP_999842 | L | Q | LQ | benign            |
| rs12972830 | NP_999843 | L | Q | LQ | benign            |

|            |           |   |   |    |                   |
|------------|-----------|---|---|----|-------------------|
| rs12972830 | NP_999844 | L | Q | LQ | benign            |
| rs12972830 | NP_999840 | L | Q | LQ | benign            |
| rs12973068 | NP_631898 | P | S | PS | possibly damaging |
| rs12973246 | XP_497630 | P | L | PL | benign            |
| rs12973294 | NP_597730 | I | S | IS | probably damaging |
| rs12973496 | XP_497630 | H | D | HD | probably damaging |
| rs12973565 | NP_201574 | S | G | SG | benign            |
| rs12973901 | NP_066358 | T | S | TS | benign            |
| rs12974243 | NP_008971 | E | K | EK | benign            |
| rs12974243 | NP_653334 | E | K | EK | benign            |
| rs12974243 | NP_653333 | E | K | EK | benign            |
| rs12974387 | NP_005225 | S | N | SN | benign            |
| rs12974411 | NP_005225 | S | N | SN | benign            |
| rs12974461 | NP_110445 | S | C | SC | possibly damaging |
| rs12974574 | NP_689813 | R | K | RK | benign            |
| rs12974581 | NP_689813 | E | D | ED | benign            |
| rs12974778 | NP_689813 | E | D | ED | benign            |
| rs12974798 | NP_006693 | E | K | EK | benign            |
| rs12974806 | NP_689813 | S | I | SI | benign            |
| rs12974819 | XP_371195 | P | R | PR | possibly damaging |
| rs12974842 | NP_775802 | M | V | MV | benign            |
| rs12974848 | NP_999841 | A | T | AT | benign            |
| rs12974848 | NP_999842 | A | T | AT | benign            |
| rs12974848 | NP_999843 | A | T | AT | benign            |
| rs12974848 | NP_999844 | A | T | AT | benign            |
| rs12974848 | NP_999840 | A | T | AT | benign            |
| rs12974851 | NP_999841 | V | L | VL | benign            |
| rs12974851 | NP_999842 | V | L | VL | benign            |
| rs12974851 | NP_999843 | V | L | VL | benign            |
| rs12974851 | NP_999844 | V | L | VL | benign            |
| rs12974851 | NP_999840 | V | L | VL | benign            |
| rs12974913 | NP_005225 | D | H | DH | benign            |
| rs12974937 | NP_056507 | M | I | MI | benign            |
| rs12975044 | NP_689813 | E | D | ED | benign            |
| rs12975322 | NP_115823 | V | I | VI | benign            |
| rs12975327 | NP_689813 | Q | H | QH | benign            |
| rs12975335 | XP_047550 | R | T | RT | benign            |
| rs12975339 | NP_689813 | R | M | RM | benign            |
| rs12975366 | NP_006831 | D | G | DG | probably damaging |
| rs12975595 | NP_005574 | P | L | PL | possibly damaging |
| rs12976117 | NP_003274 | E | K | EK | possibly damaging |
| rs12976472 | NP_038475 | L | V | LV | benign            |
| rs12976472 | NP_690880 | L | V | LV | benign            |
| rs12976472 | NP_690883 | L | V | LV | benign            |
| rs12976472 | NP_690884 | L | V | LV | benign            |
| rs12976493 | NP_690880 | L | F | LF | benign            |



|            |           |   |   |    |                   |
|------------|-----------|---|---|----|-------------------|
| rs12976493 | NP_690884 | L | F | LF | benign            |
| rs12976493 | NP_038475 | L | F | LF | possibly damaging |
| rs12976493 | NP_690883 | L | F | LF | possibly damaging |
| rs12976565 | NP_003274 | L | M | LM | benign            |
| rs12976619 | NP_004488 | N | H | NH | benign            |
| rs12976760 | NP_003274 | R | S | RS | benign            |
| rs12976917 | NP_689691 | F | I | FI | possibly damaging |
| rs12976922 | XP_371195 | K | E | KE | benign            |
| rs12976930 | NP_002902 | G | S | GS | benign            |
| rs12977062 | NP_006831 | A | T | AT | benign            |
| rs12977287 | NP_872283 | S | A | SA | benign            |
| rs12977287 | NP_689870 | S | A | SA | benign            |
| rs12977291 | NP_004488 | W | C | WC | probably damaging |
| rs12977303 | XP_292765 | H | Y | HY | probably damaging |
| rs12977398 | NP_060553 | P | A | PA | possibly damaging |
| rs12977403 | NP_065746 | H | L | HL | probably damaging |
| rs12977460 | XP_372726 | I | M | IM | benign            |
| rs12977668 | NP_060553 | S | F | SF | benign            |
| rs12977715 | NP_776256 | D | N | DN | possibly damaging |
| rs12977717 | NP_002775 | Q | R | QR | benign            |
| rs12977769 | NP_699160 | A | P | AP | benign            |
| rs12977803 | NP_064560 | D | N | DN | possibly damaging |
| rs12977942 | NP_872283 | S | W | SW | possibly damaging |
| rs12977942 | NP_689870 | S | W | SW | possibly damaging |
| rs12978146 | NP_065139 | T | A | TA | benign            |
| rs12978266 | NP_065863 | P | L | PL | probably damaging |
| rs12978445 | NP_115806 | G | S | GS | benign            |
| rs12978469 | XP_114000 | R | Q | RQ | benign            |
| rs12978498 | NP_006261 | T | P | TP | probably damaging |
| rs12978513 | NP_570602 | R | S | RS | benign            |
| rs12978667 | NP_079489 | A | P | AP | benign            |
| rs12978667 | NP_066022 | A | P | AP | benign            |
| rs12978900 | XP_290850 | L | S | LS | benign            |
| rs12978958 | XP_292765 | K | I | KI | probably damaging |
| rs12979119 | XP_371145 | D | V | DV | probably damaging |
| rs12979532 | NP_006376 | R | C | RC | probably damaging |
| rs12979532 | NP_942152 | R | C | RC | probably damaging |
| rs12979551 | XP_292724 | E | D | ED | benign            |
| rs12979574 | NP_000942 | T | R | TR | benign            |
| rs12980121 | NP_665814 | C | S | CS | probably damaging |
| rs12980121 | NP_114103 | C | S | CS | probably damaging |
| rs12980121 | NP_665813 | C | S | CS | probably damaging |
| rs12980384 | NP_073746 | Q | H | QH | possibly damaging |
| rs12980412 | XP_375619 | D | N | DN | benign            |
| rs12980412 | NP_065139 | N | D | ND | benign            |
| rs12980886 | NP_005874 | A | G | AG | benign            |

|            |           |   |   |    |                   |
|------------|-----------|---|---|----|-------------------|
| rs12980960 | NP_872304 | E | K | EK | benign            |
| rs12980998 | XP_114000 | T | S | TS | benign            |
| rs12981076 | NP_201574 | G | S | GS | benign            |
| rs12981200 | NP_000531 | A | P | AP | possibly damaging |
| rs12981714 | XP_375619 | V | G | VG | benign            |
| rs12981714 | NP_065139 | G | V | GV | probably damaging |
| rs12981771 | XP_375619 | M | R | MR | benign            |
| rs12981771 | NP_065139 | R | M | RM | benign            |
| rs12981857 | NP_004968 | D | H | DH | possibly damaging |
| rs12981963 | NP_000225 | P | L | PL | probably damaging |
| rs12982492 | NP_065879 | S | L | SL | benign            |
| rs12982617 | XP_372719 | K | I | KI | probably damaging |
| rs12982626 | XP_372719 | E | D | ED | possibly damaging |
| rs12982725 | NP_000765 | D | N | DN | possibly damaging |
| rs12982782 | NP_689475 | R | S | RS | benign            |
| rs12982998 | XP_053966 | P | H | PH | probably damaging |
| rs12983010 | NP_653292 | C | R | CR | possibly damaging |
| rs12983033 | XP_372719 | H | N | HN | benign            |
| rs12983251 | XP_372719 | E | K | EK | benign            |
| rs12983322 | XP_053966 | P | L | PL | probably damaging |
| rs12983369 | NP_005849 | R | Q | RQ | benign            |
| rs12983578 | NP_660275 | E | Q | EQ | benign            |
| rs12983777 | NP_060553 | G | V | GV | possibly damaging |
| rs12983857 | XP_496323 | R | C | RC | probably damaging |
| rs12984043 | NP_075384 | G | R | GR | benign            |
| rs12984043 | NP_835388 | G | R | GR | possibly damaging |
| rs12984371 | NP_065879 | V | G | VG | possibly damaging |
| rs12984503 | NP_065746 | R | W | RW | benign            |
| rs12984558 | NP_919409 | R | W | RW | possibly damaging |
| rs12984558 | NP_055496 | R | W | RW | possibly damaging |
| rs12984731 | XP_372719 | L | Q | LQ | benign            |
| rs12984809 | NP_065746 | P | S | PS | possibly damaging |
| rs12984938 | XP_372719 | I | R | IR | benign            |
| rs12984947 | NP_004488 | W | G | WG | probably damaging |
| rs12985291 | XP_058999 | A | D | AD | benign            |
| rs12985357 | NP_065111 | R | Q | RQ | benign            |
| rs12985807 | NP_038475 | K | I | KI | benign            |
| rs12985807 | NP_690880 | K | I | KI | benign            |
| rs12985807 | NP_690884 | K | I | KI | benign            |
| rs12985894 | XP_372712 | L | I | LI | benign            |
| rs12985925 | NP_006660 | E | A | EA | benign            |
| rs12985933 | NP_006660 | D | A | DA | benign            |
| rs12986002 | XP_290850 | H | Y | HY | benign            |
| rs12986193 | XP_496323 | M | R | MR | benign            |
| rs12986235 | XP_371200 | Q | R | QR | benign            |
| rs12986305 | NP_065746 | L | R | LR | benign            |

|            |           |   |   |    |                   |
|------------|-----------|---|---|----|-------------------|
| rs12987199 | XP_097977 | I | F | IF | benign            |
| rs12987380 | NP_938015 | M | V | MV | possibly damaging |
| rs12988301 | NP_775919 | R | W | RW | benign            |
| rs12988374 | NP_078808 | S | F | SF | possibly damaging |
| rs12988979 | XP_496623 | R | Q | RQ | benign            |
| rs12989017 | NP_114148 | K | N | KN | benign            |
| rs12989017 | NP_665809 | K | N | KN | benign            |
| rs12990449 | NP_061027 | Q | R | QR | benign            |
| rs12990978 | NP_060733 | T | P | TP | possibly damaging |
| rs12991178 | NP_060733 | T | P | TP | benign            |
| rs12991373 | XP_496601 | E | K | EK | benign            |
| rs12992066 | NP_653308 | R | Q | RQ | benign            |
| rs12992439 | XP_097977 | I | N | IN | possibly damaging |
| rs12992480 | NP_058523 | C | W | CW | probably damaging |
| rs12992480 | NP_002888 | C | W | CW | probably damaging |
| rs12992480 | NP_058520 | C | W | CW | probably damaging |
| rs12993079 | NP_075408 | D | A | DA | probably damaging |
| rs12993079 | NP_004073 | D | A | DA | probably damaging |
| rs12993599 | NP_056505 | R | Q | RQ | benign            |
| rs12994035 | NP_006584 | H | Q | HQ | probably damaging |
| rs12994124 | XP_496601 | G | V | GV | probably damaging |
| rs12995235 | NP_951060 | S | I | SI | benign            |
| rs12995235 | NP_060093 | S | I | SI | benign            |
| rs12995673 | XP_371542 | P | L | PL | probably damaging |
| rs12995839 | NP_004930 | Q | H | QH | possibly damaging |
| rs12996049 | NP_003039 | L | M | LM | benign            |
| rs12996202 | XP_498895 | F | I | FI | benign            |
| rs12997487 | NP_057525 | E | K | EK | benign            |
| rs12999226 | NP_005535 | S | F | SF | possibly damaging |
| rs13000235 | NP_620155 | C | W | CW | probably damaging |
| rs13000249 | NP_997195 | R | S | RS | benign            |
| rs13000721 | NP_997195 | A | V | AV | benign            |
| rs13001376 | NP_060041 | R | G | RG | possibly damaging |
| rs13002500 | XP_371480 | K | N | KN | benign            |
| rs13002726 | NP_000201 | E | K | EK | benign            |
| rs13003768 | NP_055744 | V | E | VE | possibly damaging |
| rs13005084 | NP_003609 | M | I | MI | benign            |
| rs13006204 | NP_919288 | A | S | AS | benign            |
| rs13006488 | NP_000224 | S | P | SP | benign            |
| rs13006529 | NP_001221 | L | I | LI | benign            |
| rs13006529 | NP_116759 | L | I | LI | benign            |
| rs13007595 | NP_689728 | T | I | TI | benign            |
| rs13008785 | XP_371476 | Y | F | YF | benign            |
| rs13009153 | NP_060461 | D | E | DE | benign            |
| rs13009279 | XP_373979 | A | T | AT | benign            |
| rs13009745 | XP_373979 | E | D | ED | benign            |

|            |           |   |   |    |                   |
|------------|-----------|---|---|----|-------------------|
| rs13010243 | XP_376189 | Q | P | QP | benign            |
| rs13010513 | NP_005782 | R | H | RH | benign            |
| rs13010627 | NP_001221 | V | I | VI | benign            |
| rs13010627 | NP_116759 | V | I | VI | benign            |
| rs13010627 | NP_116756 | V | I | VI | benign            |
| rs13011167 | NP_073153 | Q | R | QR | benign            |
| rs13011244 | XP_496601 | R | C | RC | probably damaging |
| rs13011252 | NP_689733 | T | S | TS | benign            |
| rs13011322 | XP_373979 | L | V | LV | benign            |
| rs13011359 | NP_073153 | Q | R | QR | benign            |
| rs13011490 | XP_097977 | L | V | LV | benign            |
| rs13011500 | NP_115544 | M | K | MK | probably damaging |
| rs13011600 | NP_612477 | C | G | CG | probably damaging |
| rs13011674 | XP_496601 | L | V | LV | benign            |
| rs13011768 | NP_085054 | V | I | VI | benign            |
| rs13011898 | XP_496601 | P | H | PH | probably damaging |
| rs13012310 | XP_496601 | F | L | FL | benign            |
| rs13013413 | XP_371490 | R | H | RH | benign            |
| rs13014235 | NP_631902 | L | V | LV | benign            |
| rs13015406 | XP_371476 | M | T | MT | benign            |
| rs13016910 | NP_115544 | I | F | IF | possibly damaging |
| rs13017697 | NP_055610 | A | V | AV | benign            |
| rs13018099 | NP_005680 | V | F | VF | possibly damaging |
| rs13018426 | NP_005680 | A | G | AG | benign            |
| rs13018427 | NP_005680 | N | K | NK | benign            |
| rs13018440 | NP_005680 | L | V | LV | benign            |
| rs13018444 | XP_376150 | A | V | AV | possibly damaging |
| rs13020030 | XP_498895 | A | T | AT | benign            |
| rs13020091 | XP_496611 | A | G | AG | benign            |
| rs13020272 | XP_497905 | R | C | RC | possibly damaging |
| rs13020735 | NP_006764 | A | S | AS | benign            |
| rs13021319 | NP_004027 | S | L | SL | benign            |
| rs13021567 | NP_003039 | T | S | TS | benign            |
| rs13021722 | XP_497879 | L | F | LF | benign            |
| rs13022344 | NP_055864 | I | V | IV | benign            |
| rs13023540 | NP_056505 | R | Q | RQ | benign            |
| rs13023605 | NP_073153 | R | G | RG | possibly damaging |
| rs13024542 | NP_004534 | V | G | VG | possibly damaging |
| rs13024801 | NP_073737 | G | S | GS | benign            |
| rs13025959 | XP_291001 | E | D | ED | benign            |
| rs13026692 | NP_001623 | I | L | IL | benign            |
| rs13027171 | NP_006334 | N | S | NS | benign            |
| rs13028202 | NP_002945 | D | N | DN | possibly damaging |
| rs13028389 | NP_073153 | T | I | TI | benign            |
| rs13028392 | NP_002945 | E | K | EK | benign            |
| rs13029218 | XP_373979 | N | I | NI | benign            |

|            |           |   |   |    |                   |
|------------|-----------|---|---|----|-------------------|
| rs13029446 | NP_998754 | S | C | SC | benign            |
| rs13029846 | NP_056993 | I | V | IV | benign            |
| rs13029913 | NP_073153 | Q | H | QH | benign            |
| rs13030376 | NP_002245 | S | C | SC | benign            |
| rs13030382 | NP_002245 | P | A | PA | possibly damaging |
| rs13030638 | XP_209489 | C | R | CR | probably damaging |
| rs13031147 | NP_775919 | F | L | FL | benign            |
| rs13031859 | NP_919224 | R | C | RC | benign            |
| rs13031957 | NP_115642 | N | S | NS | benign            |
| rs13033248 | NP_919288 | I | V | IV | benign            |
| rs13034477 | NP_689733 | N | K | NK | possibly damaging |
| rs13034635 | NP_689733 | A | G | AG | benign            |
| rs13034775 | NP_061720 | R | Q | RQ | benign            |
| rs13035211 | NP_115544 | E | D | ED | benign            |
| rs13036061 | NP_061875 | M | T | MT | benign            |
| rs13036355 | NP_065764 | K | R | KR | benign            |
| rs13036385 | NP_872325 | R | P | RP | possibly damaging |
| rs13037050 | NP_057069 | E | A | EA | benign            |
| rs13037181 | NP_877398 | D | V | DV | probably damaging |
| rs13037181 | NP_056007 | D | V | DV | probably damaging |
| rs13037638 | NP_942093 | N | H | NH | possibly damaging |
| rs13037900 | NP_071753 | P | H | PH | possibly damaging |
| rs13038328 | NP_057069 | L | V | LV | benign            |
| rs13038580 | NP_002187 | F | L | FL | benign            |
| rs13039338 | NP_055073 | T | K | TK | possibly damaging |
| rs13039398 | NP_005551 | R | W | RW | benign            |
| rs13039453 | NP_954673 | W | R | WR | probably damaging |
| rs13039453 | NP_954580 | W | R | WR | probably damaging |
| rs13039828 | NP_006517 | Q | R | QR | benign            |
| rs13040097 | NP_002942 | S | N | SN | benign            |
| rs13041270 | NP_877398 | D | E | DE | benign            |
| rs13041270 | NP_056007 | D | E | DE | benign            |
| rs13041394 | NP_818932 | S | F | SF | benign            |
| rs13041394 | NP_036288 | S | F | SF | benign            |
| rs13041706 | NP_005216 | A | S | AS | benign            |
| rs13041707 | NP_005216 | A | S | AS | benign            |
| rs13042064 | NP_055073 | T | P | TP | possibly damaging |
| rs13042158 | NP_056081 | L | M | LM | benign            |
| rs13042905 | NP_071753 | P | L | PL | benign            |
| rs13043353 | NP_877398 | T | P | TP | possibly damaging |
| rs13043353 | NP_056007 | T | P | TP | possibly damaging |
| rs13043752 | NP_000678 | R | W | RW | possibly damaging |
| rs13043898 | NP_057069 | S | T | ST | benign            |
| rs13044006 | NP_006233 | G | D | GD | possibly damaging |
| rs13046170 | NP_689718 | C | Y | CY | probably damaging |
| rs13047375 | NP_004330 | S | A | SA | benign            |

|            |           |   |   |    |                   |
|------------|-----------|---|---|----|-------------------|
| rs13047465 | NP_002597 | C | Y | CY | probably damaging |
| rs13047478 | NP_478060 | P | S | PS | possibly damaging |
| rs13047599 | NP_003094 | C | R | CR | benign            |
| rs13047599 | NP_115571 | R | C | RC | benign            |
| rs13047599 | NP_620304 | R | C | RC | benign            |
| rs13047599 | NP_620305 | R | C | RC | benign            |
| rs13047599 | NP_478063 | R | C | RC | possibly damaging |
| rs13048049 | NP_061834 | R | Q | RQ | benign            |
| rs13048804 | NP_444507 | S | G | SG | benign            |
| rs13049028 | NP_444507 | Q | E | QE | benign            |
| rs13049404 | NP_478060 | P | L | PL | probably damaging |
| rs13049591 | NP_066553 | T | K | TK | benign            |
| rs13049658 | NP_478063 | T | M | TM | benign            |
| rs13049658 | NP_115571 | T | M | TM | possibly damaging |
| rs13049658 | NP_620304 | T | M | TM | possibly damaging |
| rs13049658 | NP_620305 | T | M | TM | possibly damaging |
| rs13049658 | NP_003094 | T | M | TM | possibly damaging |
| rs13049745 | NP_444507 | V | D | VD | benign            |
| rs13050238 | NP_005102 | A | T | AT | benign            |
| rs13050238 | NP_660354 | A | T | AT | benign            |
| rs13050238 | NP_665857 | A | T | AT | benign            |
| rs13050272 | XP_497781 | E | K | EK | benign            |
| rs13050334 | NP_071398 | T | I | TI | benign            |
| rs13051496 | NP_001839 | S | L | SL | benign            |
| rs13053363 | XP_496534 | A | T | AT | benign            |
| rs13054189 | NP_115997 | D | G | DG | possibly damaging |
| rs13054930 | NP_114408 | E | Q | EQ | benign            |
| rs13054973 | NP_005189 | S | N | SN | benign            |
| rs13054979 | NP_998885 | V | L | VL | benign            |
| rs13055061 | NP_055107 | P | A | PA | benign            |
| rs13055639 | XP_371470 | V | A | VA | benign            |
| rs13056405 | NP_149977 | S | N | SN | benign            |
| rs13056617 | XP_496534 | R | S | RS | possibly damaging |
| rs13056825 | NP_660341 | N | S | NS | benign            |
| rs13056958 | NP_001042 | A | V | AV | benign            |
| rs13057011 | NP_775781 | R | S | RS | benign            |
| rs13057124 | NP_001042 | F | L | FL | benign            |
| rs13057290 | NP_037497 | V | L | VL | benign            |
| rs13057311 | NP_055493 | R | K | RK | benign            |
| rs13057352 | NP_073603 | L | F | LF | benign            |
| rs13057474 | XP_377720 | E | K | EK | benign            |
| rs13057681 | XP_037493 | D | H | DH | benign            |
| rs13057803 | NP_000622 | I | T | IT | possibly damaging |
| rs13057803 | NP_038202 | I | T | IT | possibly damaging |
| rs13058434 | NP_115997 | P | L | PL | benign            |
| rs13058467 | NP_055955 | N | S | NS | benign            |

|            |           |   |   |    |                   |
|------------|-----------|---|---|----|-------------------|
| rs13059238 | NP_078789 | N | D | ND | benign            |
| rs13059332 | NP_073600 | S | C | SC | possibly damaging |
| rs13059805 | NP_054858 | G | E | GE | possibly damaging |
| rs13059964 | NP_055298 | S | F | SF | benign            |
| rs13060028 | XP_031246 | C | W | CW | probably damaging |
| rs13060040 | XP_031246 | S | R | SR | possibly damaging |
| rs13060627 | NP_570843 | I | V | IV | benign            |
| rs13060838 | NP_079199 | P | S | PS | possibly damaging |
| rs13060847 | NP_006605 | T | A | TA | benign            |
| rs13060964 | NP_849146 | L | P | LP | benign            |
| rs13061862 | NP_004788 | G | V | GV | probably damaging |
| rs13062294 | XP_291064 | Q | H | QH | benign            |
| rs13062943 | NP_872437 | A | G | AG | benign            |
| rs13062993 | NP_065747 | V | A | VA | benign            |
| rs13063311 | NP_055463 | I | F | IF | benign            |
| rs13063688 | XP_031246 | V | G | VG | possibly damaging |
| rs13064039 | NP_002941 | G | A | GA | benign            |
| rs13064206 | NP_002941 | S | F | SF | possibly damaging |
| rs13064319 | NP_079103 | Q | H | QH | possibly damaging |
| rs13064394 | NP_689607 | A | S | AS | benign            |
| rs13064708 | NP_114161 | T | P | TP | benign            |
| rs13064905 | XP_496634 | E | D | ED | benign            |
| rs13065048 | XP_496634 | T | A | TA | benign            |
| rs13065525 | XP_210562 | L | F | LF | benign            |
| rs13066806 | NP_073613 | V | G | VG | possibly damaging |
| rs13067702 | XP_497911 | I | M | IM | probably damaging |
| rs13068038 | NP_835467 | D | E | DE | benign            |
| rs13068498 | XP_497921 | S | F | SF | possibly damaging |
| rs13070515 | NP_570843 | L | P | LP | probably damaging |
| rs13071874 | NP_065941 | I | V | IV | benign            |
| rs13072536 | NP_002209 | I | N | IN | benign            |
| rs13073018 | XP_209554 | C | R | CR | probably damaging |
| rs13073139 | NP_000051 | A | T | AT | benign            |
| rs13073546 | NP_000395 | I | V | IV | benign            |
| rs13074913 | NP_003938 | W | G | WG | probably damaging |
| rs13075884 | NP_079223 | E | G | EG | possibly damaging |
| rs13076542 | NP_002366 | D | G | DG | benign            |
| rs13076836 | NP_073594 | M | R | MR | benign            |
| rs13077498 | NP_940964 | E | K | EK | benign            |
| rs13078735 | NP_002438 | V | M | VM | benign            |
| rs13078867 | NP_653316 | P | S | PS | possibly damaging |
| rs13078881 | NP_000051 | D | H | DH | possibly damaging |
| rs13079478 | NP_078789 | N | K | NK | benign            |
| rs13079660 | NP_003065 | Y | C | YC | probably damaging |
| rs13079661 | NP_003065 | S | C | SC | possibly damaging |
| rs13081741 | NP_004584 | V | M | VM | benign            |

|            |           |   |   |    |                   |
|------------|-----------|---|---|----|-------------------|
| rs13081859 | NP_079445 | F | S | FS | benign            |
| rs13081902 | NP_004584 | V | I | VI | benign            |
| rs13081937 | NP_079199 | D | E | DE | benign            |
| rs13082605 | NP_055893 | N | S | NS | benign            |
| rs13082830 | NP_899630 | V | D | VD | possibly damaging |
| rs13082830 | NP_899631 | V | D | VD | possibly damaging |
| rs13082830 | NP_003707 | V | D | VD | possibly damaging |
| rs13083435 | NP_060662 | H | P | HP | probably damaging |
| rs13083928 | NP_065941 | P | L | PL | probably damaging |
| rs13084057 | XP_497921 | A | P | AP | probably damaging |
| rs13085338 | XP_210562 | L | I | LI | benign            |
| rs13085828 | NP_001398 | R | I | RI | possibly damaging |
| rs13085851 | XP_376201 | E | Q | EQ | benign            |
| rs13085855 | NP_940865 | T | P | TP | possibly damaging |
| rs13087457 | NP_004517 | G | R | GR | benign            |
| rs13087612 | XP_496634 | F | L | FL | probably damaging |
| rs13087729 | NP_057456 | S | R | SR | benign            |
| rs13088642 | XP_041363 | L | M | LM | benign            |
| rs13088676 | XP_041363 | A | D | AD | possibly damaging |
| rs13088948 | NP_001670 | V | G | VG | probably damaging |
| rs13089403 | XP_291028 | A | D | AD | benign            |
| rs13089536 | XP_041363 | G | V | GV | probably damaging |
| rs13089940 | XP_041363 | A | P | AP | benign            |
| rs13091100 | NP_003062 | V | G | VG | possibly damaging |
| rs13091100 | NP_620636 | V | G | VG | possibly damaging |
| rs13093808 | XP_291055 | A | E | AE | benign            |
| rs13094535 | XP_497912 | R | K | RK | benign            |
| rs13094868 | XP_496642 | D | H | DH | possibly damaging |
| rs13094925 | XP_045911 | M | I | MI | probably damaging |
| rs13095607 | XP_291080 | H | Y | HY | benign            |
| rs13095608 | NP_114438 | V | G | VG | possibly damaging |
| rs13096122 | XP_209554 | L | M | LM | benign            |
| rs13096767 | NP_078963 | G | A | GA | benign            |
| rs13096789 | NP_115894 | C | R | CR | probably damaging |
| rs13096947 | NP_002366 | S | P | SP | benign            |
| rs13097123 | NP_703192 | P | L | PL | probably damaging |
| rs13097314 | NP_620160 | R | H | RH | possibly damaging |
| rs13097415 | NP_002366 | P | L | PL | probably damaging |
| rs13097796 | NP_006021 | P | A | PA | probably damaging |
| rs13098148 | NP_006587 | L | V | LV | benign            |
| rs13098148 | NP_955452 | L | V | LV | benign            |
| rs13098836 | NP_776160 | I | V | IV | benign            |
| rs13099146 | NP_063948 | T | P | TP | possibly damaging |
| rs13099684 | NP_073594 | N | T | NT | benign            |
| rs13099699 | NP_003065 | Y | D | YD | probably damaging |
| rs13100173 | NP_003540 | H | Y | HY | possibly damaging |



|            |           |   |   |    |                   |
|------------|-----------|---|---|----|-------------------|
| rs13101652 | XP_209655 | M | T | MT | benign            |
| rs13102250 | NP_006059 | L | W | LW | possibly damaging |
| rs13103807 | NP_057683 | P | L | PL | probably damaging |
| rs13104984 | NP_001502 | L | I | LI | benign            |
| rs13105608 | NP_006578 | D | G | DG | possibly damaging |
| rs13106366 | NP_640336 | N | T | NT | benign            |
| rs13106561 | NP_640336 | T | P | TP | benign            |
| rs13106574 | NP_932069 | I | V | IV | benign            |
| rs13106730 | NP_640336 | A | G | AG | benign            |
| rs13106867 | XP_035572 | P | L | PL | probably damaging |
| rs13107325 | NP_071437 | A | T | AT | benign            |
| rs13107595 | NP_006448 | N | S | NS | possibly damaging |
| rs13108827 | XP_093895 | E | K | EK | benign            |
| rs13108832 | XP_093895 | E | Q | EQ | benign            |
| rs13109774 | NP_003934 | P | L | PL | probably damaging |
| rs13110927 | XP_376353 | N | D | ND | benign            |
| rs13112358 | NP_060718 | L | P | LP | possibly damaging |
| rs13112390 | NP_060718 | H | Q | HQ | probably damaging |
| rs13113639 | NP_149113 | T | P | TP | possibly damaging |
| rs13114026 | NP_060203 | V | I | VI | benign            |
| rs13115344 | NP_060203 | R | H | RH | benign            |
| rs13115990 | NP_938167 | P | L | PL | probably damaging |
| rs13116684 | NP_997213 | I | V | IV | benign            |
| rs13116875 | NP_689896 | F | L | FL | possibly damaging |
| rs13117632 | NP_277077 | I | N | IN | possibly damaging |
| rs13118336 | NP_787114 | W | R | WR | probably damaging |
| rs13118702 | XP_093895 | E | K | EK | benign            |
| rs13119049 | NP_066962 | D | E | DE | possibly damaging |
| rs13119073 | NP_689834 | Y | D | YD | possibly damaging |
| rs13119384 | NP_115525 | P | S | PS | benign            |
| rs13119545 | NP_003610 | T | R | TR | benign            |
| rs13125836 | NP_620775 | D | N | DN | benign            |
| rs13127336 | NP_037499 | S | N | SN | benign            |
| rs13127820 | NP_002439 | M | L | ML | possibly damaging |
| rs13128286 | NP_079019 | T | A | TA | benign            |
| rs13129474 | NP_002244 | V | I | VI | benign            |
| rs13131258 | NP_777612 | F | V | FV | benign            |
| rs13131259 | NP_777612 | C | W | CW | benign            |
| rs13131342 | NP_112569 | Y | N | YN | probably damaging |
| rs13131525 | NP_848651 | E | K | EK | benign            |
| rs13132885 | NP_057295 | I | K | IK | probably damaging |
| rs13132885 | NP_055748 | I | K | IK | probably damaging |
| rs13134070 | NP_058626 | D | Y | DY | probably damaging |
| rs13134806 | NP_277077 | N | K | NK | possibly damaging |
| rs13135541 | XP_373035 | L | I | LI | benign            |
| rs13135778 | NP_689831 | D | N | DN | benign            |

|            |           |   |   |    |                   |
|------------|-----------|---|---|----|-------------------|
| rs13135886 | NP_116316 | H | R | HR | possibly damaging |
| rs13136287 | NP_787114 | R | P | RP | possibly damaging |
| rs13138325 | NP_057295 | I | V | IV | benign            |
| rs13138325 | NP_055748 | I | V | IV | benign            |
| rs13140552 | XP_293687 | P | A | PA | benign            |
| rs13141787 | XP_094074 | S | F | SF | possibly damaging |
| rs13143848 | NP_115525 | E | G | EG | possibly damaging |
| rs13144341 | NP_573574 | S | G | SG | benign            |
| rs13144371 | NP_004958 | G | D | GD | benign            |
| rs13146272 | NP_997235 | K | Q | KQ | benign            |
| rs13146847 | NP_149113 | D | A | DA | probably damaging |
| rs13147012 | XP_376334 | T | A | TA | benign            |
| rs13148353 | NP_079420 | R | H | RH | benign            |
| rs13149772 | NP_000397 | A | P | AP | possibly damaging |
| rs13149890 | NP_057213 | D | E | DE | benign            |
| rs13151294 | NP_006717 | F | L | FL | possibly damaging |
| rs13151295 | NP_006717 | F | V | FV | possibly damaging |
| rs13151385 | NP_001338 | A | S | AS | benign            |
| rs13151700 | XP_037817 | V | L | VL | benign            |
| rs13152058 | NP_055280 | W | G | WG | probably damaging |
| rs13152776 | NP_003254 | E | V | EV | probably damaging |
| rs13153166 | NP_114399 | S | R | SR | benign            |
| rs13153247 | XP_043493 | R | P | RP | probably damaging |
| rs13153253 | XP_043493 | K | N | KN | possibly damaging |
| rs13153261 | XP_043493 | E | K | EK | possibly damaging |
| rs13154302 | NP_004165 | R | Q | RQ | benign            |
| rs13155282 | NP_861439 | E | D | ED | benign            |
| rs13155288 | NP_861439 | L | P | LP | probably damaging |
| rs13155520 | NP_861439 | S | F | SF | possibly damaging |
| rs13157538 | NP_061760 | T | A | TA | benign            |
| rs13157656 | NP_000578 | T | P | TP | benign            |
| rs13157990 | NP_055548 | R | G | RG | probably damaging |
| rs13158350 | NP_689835 | D | N | DN | benign            |
| rs13158435 | NP_061759 | D | A | DA | probably damaging |
| rs13158443 | NP_061759 | T | P | TP | probably damaging |
| rs13159001 | XP_291141 | I | S | IS | benign            |
| rs13161018 | NP_001436 | T | M | TM | benign            |
| rs13162063 | NP_053584 | S | N | SN | benign            |
| rs13162063 | NP_053585 | S | N | SN | benign            |
| rs13162063 | NP_053586 | S | N | SN | benign            |
| rs13162063 | NP_004874 | S | N | SN | benign            |
| rs13162195 | NP_665874 | R | K | RK | benign            |
| rs13163938 | XP_171094 | D | Y | DY | probably damaging |
| rs13164210 | NP_056484 | S | P | SP | benign            |
| rs13166146 | NP_000818 | D | N | DN | possibly damaging |
| rs13166161 | NP_000818 | P | T | PT | probably damaging |

|            |           |   |   |    |                   |
|------------|-----------|---|---|----|-------------------|
| rs13166360 | NP_065433 | V | L | VL | benign            |
| rs13166438 | NP_000818 | A | S | AS | benign            |
| rs13166485 | NP_004376 | D | E | DE | benign            |
| rs13166905 | XP_498030 | T | P | TP | benign            |
| rs13167170 | NP_056157 | N | T | NT | possibly damaging |
| rs13167392 | NP_060826 | T | P | TP | possibly damaging |
| rs13167526 | NP_056157 | A | P | AP | benign            |
| rs13167812 | NP_057374 | R | W | RW | benign            |
| rs13168357 | XP_209719 | L | P | LP | benign            |
| rs13168659 | NP_073739 | M | I | MI | benign            |
| rs13169133 | NP_071916 | C | R | CR | probably damaging |
| rs13169854 | XP_498013 | Y | C | YC | probably damaging |
| rs13170082 | NP_079143 | V | A | VA | benign            |
| rs13170390 | NP_079143 | P | A | PA | possibly damaging |
| rs13170917 | NP_061763 | S | G | SG | benign            |
| rs13171859 | NP_115267 | V | I | VI | benign            |
| rs13171859 | NP_061746 | V | I | VI | benign            |
| rs13173779 | NP_114480 | Y | D | YD | probably damaging |
| rs13173779 | NP_114481 | Y | D | YD | probably damaging |
| rs13173779 | NP_061737 | Y | D | YD | probably damaging |
| rs13173820 | NP_114480 | V | G | VG | probably damaging |
| rs13173820 | NP_114481 | V | G | VG | probably damaging |
| rs13173820 | NP_061737 | V | G | VG | probably damaging |
| rs13173930 | NP_775760 | H | R | HR | probably damaging |
| rs13174039 | NP_006718 | V | G | VG | probably damaging |
| rs13174166 | NP_053585 | S | R | SR | benign            |
| rs13174166 | NP_053584 | S | R | SR | possibly damaging |
| rs13174166 | NP_053586 | S | R | SR | possibly damaging |
| rs13174166 | NP_004874 | S | R | SR | possibly damaging |
| rs13174484 | NP_775760 | V | M | VM | benign            |
| rs13174866 | NP_061763 | L | V | LV | benign            |
| rs13174972 | NP_061760 | G | S | GS | benign            |
| rs13175226 | NP_003053 | D | G | DG | probably damaging |
| rs13175548 | NP_061759 | G | S | GS | benign            |
| rs13176401 | NP_113598 | T | I | TI | benign            |
| rs13176401 | NP_061723 | T | I | TI | benign            |
| rs13176519 | NP_066008 | R | C | RC | benign            |
| rs13176636 | XP_291141 | D | G | DG | possibly damaging |
| rs13176756 | NP_061759 | P | Q | PQ | benign            |
| rs13176770 | XP_291141 | N | K | NK | benign            |
| rs13176883 | NP_009049 | E | Q | EQ | benign            |
| rs13176948 | NP_005500 | H | P | HP | probably damaging |
| rs13177229 | NP_699192 | L | I | LI | benign            |
| rs13177917 | NP_689835 | N | K | NK | possibly damaging |
| rs13179480 | NP_004937 | D | A | DA | benign            |
| rs13179490 | NP_004937 | H | P | HP | probably damaging |

|            |           |   |   |    |                   |
|------------|-----------|---|---|----|-------------------|
| rs13179709 | NP_597713 | S | T | ST | benign            |
| rs13180104 | NP_061760 | S | R | SR | benign            |
| rs13180806 | NP_005564 | L | V | LV | benign            |
| rs13181823 | NP_689835 | N | D | ND | benign            |
| rs13181859 | NP_008948 | P | L | PL | probably damaging |
| rs13181859 | NP_848511 | P | L | PL | probably damaging |
| rs13181973 | NP_001955 | T | I | TI | possibly damaging |
| rs13181975 | NP_689835 | D | V | DV | possibly damaging |
| rs13182471 | XP_496766 | L | V | LV | benign            |
| rs13182489 | XP_291128 | N | T | NT | benign            |
| rs13182512 | NP_689618 | L | M | LM | possibly damaging |
| rs13183625 | NP_115822 | P | L | PL | probably damaging |
| rs13183830 | XP_171094 | V | G | VG | probably damaging |
| rs13184107 | NP_620586 | D | N | DN | benign            |
| rs13184139 | NP_004376 | D | V | DV | probably damaging |
| rs13184186 | NP_115271 | A | G | AG | benign            |
| rs13184186 | NP_061749 | A | G | AG | possibly damaging |
| rs13184406 | NP_071916 | H | R | HR | benign            |
| rs13184503 | NP_115271 | A | G | AG | benign            |
| rs13184503 | NP_061749 | A | G | AG | benign            |
| rs13184505 | NP_115271 | Q | E | QE | benign            |
| rs13184505 | NP_061749 | Q | E | QE | benign            |
| rs13186047 | NP_000818 | V | G | VG | probably damaging |
| rs13186162 | XP_496766 | Q | R | QR | possibly damaging |
| rs13186241 | NP_000818 | I | M | IM | benign            |
| rs13186365 | NP_000818 | F | S | FS | possibly damaging |
| rs13186534 | NP_000818 | F | L | FL | benign            |
| rs13188049 | NP_057664 | R | S | RS | benign            |
| rs13188215 | NP_114480 | S | F | SF | probably damaging |
| rs13188215 | NP_114481 | S | F | SF | probably damaging |
| rs13188215 | NP_061737 | S | F | SF | probably damaging |
| rs13188519 | NP_689838 | A | G | AG | benign            |
| rs13189280 | NP_061763 | P | L | PL | benign            |
| rs13189440 | NP_060084 | A | D | AD | benign            |
| rs13189658 | NP_113688 | R | W | RW | benign            |
| rs13189658 | NP_061730 | R | W | RW | benign            |
| rs13190449 | NP_775759 | A | V | AV | benign            |
| rs13193063 | XP_371825 | M | T | MT | benign            |
| rs13193114 | XP_294019 | T | A | TA | benign            |
| rs13194101 | NP_777570 | V | A | VA | benign            |
| rs13194584 | NP_057314 | N | S | NS | benign            |
| rs13194995 | NP_065121 | T | S | TS | benign            |
| rs13195401 | NP_008980 | W | L | WL | probably damaging |
| rs13195401 | NP_510961 | W | L | WL | probably damaging |
| rs13195402 | NP_008980 | W | C | WC | probably damaging |
| rs13195402 | NP_510961 | W | C | WC | probably damaging |

|            |           |   |   |    |                   |
|------------|-----------|---|---|----|-------------------|
| rs13195509 | NP_008980 | V | M | VM | benign            |
| rs13195509 | NP_510961 | V | M | VM | benign            |
| rs13195829 | NP_005609 | W | G | WG | probably damaging |
| rs13196796 | XP_166450 | Y | F | YF | benign            |
| rs13196902 | XP_166450 | Q | E | QE | benign            |
| rs13197356 | NP_055968 | T | P | TP | benign            |
| rs13197841 | NP_005059 | I | L | IL | benign            |
| rs13198026 | NP_002835 | N | T | NT | benign            |
| rs13199791 | NP_640337 | A | S | AS | benign            |
| rs13200055 | NP_003309 | A | V | AV | benign            |
| rs13200344 | NP_004146 | C | W | CW | probably damaging |
| rs13200355 | NP_443145 | I | N | IN | possibly damaging |
| rs13200925 | NP_065855 | D | N | DN | possibly damaging |
| rs13201491 | XP_496798 | P | T | PT | possibly damaging |
| rs13201823 | XP_371817 | D | E | DE | benign            |
| rs13202027 | XP_496798 | G | C | GC | benign            |
| rs13202683 | XP_496798 | S | Y | SY | possibly damaging |
| rs13202977 | XP_376518 | T | I | TI | benign            |
| rs13203003 | NP_065806 | E | D | ED | benign            |
| rs13203293 | XP_371837 | A | V | AV | possibly damaging |
| rs13203993 | NP_078857 | E | K | EK | benign            |
| rs13204101 | NP_775945 | T | P | TP | benign            |
| rs13204107 | NP_775945 | T | P | TP | possibly damaging |
| rs13204209 | NP_001849 | E | G | EG | possibly damaging |
| rs13204223 | NP_065121 | D | E | DE | benign            |
| rs13204349 | NP_065121 | M | I | MI | benign            |
| rs13204476 | NP_963853 | R | S | RS | probably damaging |
| rs13205210 | NP_060224 | M | T | MT | benign            |
| rs13207293 | XP_376518 | T | P | TP | benign            |
| rs13207310 | XP_376518 | D | A | DA | benign            |
| rs13207595 | NP_598000 | H | R | HR | probably damaging |
| rs13207772 | NP_060762 | K | N | KN | benign            |
| rs13208706 | NP_659462 | F | L | FL | benign            |
| rs13209311 | NP_055833 | Y | C | YC | probably damaging |
| rs13209396 | NP_862825 | S | I | SI | benign            |
| rs13209403 | NP_862825 | S | I | SI | benign            |
| rs13209405 | NP_862825 | Q | H | QH | benign            |
| rs13210117 | NP_002621 | I | T | IT | benign            |
| rs13210127 | NP_892006 | K | T | KT | benign            |
| rs13210127 | NP_149062 | K | T | KT | possibly damaging |
| rs13210426 | NP_065806 | V | G | VG | possibly damaging |
| rs13210431 | NP_065806 | C | W | CW | probably damaging |
| rs13210442 | NP_065806 | V | G | VG | possibly damaging |
| rs13210446 | NP_065806 | F | V | FV | possibly damaging |
| rs13210448 | NP_065806 | V | G | VG | possibly damaging |
| rs13210569 | NP_065806 | L | V | LV | benign            |

|            |           |   |   |    |                   |
|------------|-----------|---|---|----|-------------------|
| rs13210845 | NP_149062 | N | S | NS | benign            |
| rs13210845 | NP_892006 | N | S | NS | benign            |
| rs13211183 | XP_294139 | N | S | NS | benign            |
| rs13212023 | NP_722581 | S | P | SP | benign            |
| rs13212409 | NP_001892 | R | C | RC | possibly damaging |
| rs13212806 | XP_166443 | Y | S | YS | probably damaging |
| rs13213262 | NP_005898 | L | F | LF | benign            |
| rs13213314 | XP_496824 | T | S | TS | benign            |
| rs13213706 | NP_057569 | C | W | CW | probably damaging |
| rs13213889 | NP_851853 | A | V | AV | benign            |
| rs13214568 | NP_079537 | L | M | LM | benign            |
| rs13215023 | NP_443145 | R | K | RK | benign            |
| rs13215027 | NP_443145 | A | P | AP | benign            |
| rs13216256 | NP_065188 | C | W | CW | probably damaging |
| rs13216733 | NP_003212 | D | E | DE | benign            |
| rs13216757 | NP_899236 | Y | H | YH | possibly damaging |
| rs13216828 | NP_008978 | S | N | SN | benign            |
| rs13217660 | XP_496798 | S | P | SP | possibly damaging |
| rs13217978 | NP_056108 | S | P | SP | possibly damaging |
| rs13217978 | NP_598411 | S | P | SP | possibly damaging |
| rs13217978 | NP_149062 | S | P | SP | possibly damaging |
| rs13217978 | NP_892006 | S | P | SP | possibly damaging |
| rs13218057 | XP_496798 | L | R | LR | possibly damaging |
| rs13218137 | XP_496798 | S | C | SC | benign            |
| rs13218909 | XP_376518 | E | D | ED | benign            |
| rs13219364 | NP_849145 | R | K | RK | benign            |
| rs13219837 | NP_612417 | D | E | DE | benign            |
| rs13220505 | NP_065121 | E | A | EA | benign            |
| rs13220512 | NP_065121 | T | S | TS | benign            |
| rs13220949 | NP_000768 | R | K | RK | possibly damaging |
| rs13221869 | NP_001224 | F | L | FL | possibly damaging |
| rs13222448 | NP_848654 | K | R | KR | benign            |
| rs13223375 | XP_373223 | K | N | KN | benign            |
| rs13223377 | XP_373223 | R | P | RP | possibly damaging |
| rs13224019 | NP_775835 | T | S | TS | benign            |
| rs13224273 | XP_166573 | C | W | CW | probably damaging |
| rs13224304 | NP_775835 | C | Y | CY | probably damaging |
| rs13224700 | NP_005514 | A | V | AV | benign            |
| rs13225435 | XP_171158 | T | A | TA | benign            |
| rs13225917 | NP_079202 | D | N | DN | benign            |
| rs13226304 | XP_373223 | P | R | PR | benign            |
| rs13226319 | XP_373223 | P | A | PA | possibly damaging |
| rs13226391 | XP_376588 | L | P | LP | possibly damaging |
| rs13226569 | XP_376720 | A | T | AT | benign            |
| rs13226590 | XP_376588 | A | S | AS | benign            |
| rs13227127 | XP_373223 | R | H | RH | benign            |

|            |           |   |   |    |                   |
|------------|-----------|---|---|----|-------------------|
| rs13227435 | NP_951038 | G | A | GA | benign            |
| rs13227841 | NP_872310 | R | W | RW | possibly damaging |
| rs13228098 | NP_694544 | G | E | GE | possibly damaging |
| rs13229174 | XP_069623 | T | A | TA | benign            |
| rs13229689 | XP_496852 | Y | H | YH | benign            |
| rs13229806 | NP_060854 | L | V | LV | benign            |
| rs13229808 | NP_060854 | C | G | CG | possibly damaging |
| rs13229961 | NP_742053 | S | T | ST | benign            |
| rs13229961 | NP_000229 | S | T | ST | benign            |
| rs13231116 | NP_733751 | P | T | PT | benign            |
| rs13231116 | NP_067053 | P | T | PT | possibly damaging |
| rs13231261 | NP_787082 | C | W | CW | probably damaging |
| rs13231327 | XP_376610 | S | G | SG | benign            |
| rs13231392 | XP_376720 | G | D | GD | possibly damaging |
| rs13232463 | NP_689772 | S | W | SW | benign            |
| rs13232713 | NP_078913 | S | P | SP | benign            |
| rs13232718 | NP_078913 | F | V | FV | possibly damaging |
| rs13233476 | XP_498236 | T | A | TA | benign            |
| rs13233513 | NP_065779 | C | S | CS | probably damaging |
| rs13233636 | NP_002778 | T | P | TP | probably damaging |
| rs13233694 | XP_377958 | G | S | GS | benign            |
| rs13233803 | NP_000768 | R | T | RT | probably damaging |
| rs13234554 | NP_001224 | D | G | DG | probably damaging |
| rs13234724 | NP_078987 | S | G | SG | benign            |
| rs13235235 | XP_069623 | Y | H | YH | benign            |
| rs13235676 | XP_496879 | K | Q | KQ | benign            |
| rs13236790 | NP_061884 | K | E | KE | benign            |
| rs13236790 | NP_996999 | K | E | KE | benign            |
| rs13236790 | NP_996994 | K | E | KE | benign            |
| rs13237089 | NP_065150 | S | F | SF | benign            |
| rs13237267 | NP_057033 | E | Q | EQ | benign            |
| rs13237344 | XP_496889 | M | L | ML | benign            |
| rs13237588 | XP_373223 | S | P | SP | benign            |
| rs13237814 | NP_001449 | G | R | GR | probably damaging |
| rs13238986 | NP_076956 | K | T | KT | benign            |
| rs13238987 | NP_076956 | K | Q | KQ | benign            |
| rs13239382 | NP_663733 | K | I | KI | probably damaging |
| rs13239382 | NP_004071 | K | I | KI | probably damaging |
| rs13239426 | NP_057304 | K | T | KT | benign            |
| rs13239433 | NP_057304 | R | G | RG | possibly damaging |
| rs13239533 | NP_001779 | N | T | NT | possibly damaging |
| rs13240247 | XP_373223 | H | R | HR | possibly damaging |
| rs13240350 | XP_373223 | T | P | TP | benign            |
| rs13241921 | NP_689772 | Q | R | QR | benign            |
| rs13242341 | XP_373219 | I | M | IM | benign            |
| rs13242820 | XP_496852 | R | T | RT | benign            |

|            |           |   |   |    |                   |
|------------|-----------|---|---|----|-------------------|
| rs13243961 | NP_031368 | D | N | DN | benign            |
| rs13244067 | XP_373223 | N | S | NS | benign            |
| rs13244259 | NP_115693 | F | L | FL | benign            |
| rs13244810 | XP_165511 | N | T | NT | benign            |
| rs13245390 | XP_498171 | K | E | KE | benign            |
| rs13245758 | NP_851994 | S | T | ST | benign            |
| rs13245758 | NP_065162 | S | T | ST | benign            |
| rs13246077 | NP_851994 | S | Y | SY | possibly damaging |
| rs13246077 | NP_065162 | S | Y | SY | possibly damaging |
| rs13246088 | NP_002132 | L | F | LF | benign            |
| rs13246682 | NP_000656 | E | K | EK | benign            |
| rs13246682 | NP_056646 | E | K | EK | benign            |
| rs13246887 | NP_009201 | E | K | EK | benign            |
| rs13247092 | NP_078913 | Q | H | QH | benign            |
| rs13249097 | NP_054831 | T | A | TA | benign            |
| rs13249533 | NP_000653 | R | Q | RQ | benign            |
| rs13249542 | NP_659400 | H | N | HN | probably damaging |
| rs13250032 | NP_659400 | A | S | AS | benign            |
| rs13251732 | NP_000309 | G | S | GS | benign            |
| rs13252213 | XP_376736 | A | T | AT | benign            |
| rs13252403 | NP_078997 | L | P | LP | possibly damaging |
| rs13254277 | NP_079107 | E | Q | EQ | benign            |
| rs13255076 | NP_742056 | S | T | ST | benign            |
| rs13255076 | NP_742057 | S | T | ST | benign            |
| rs13255076 | NP_742055 | S | T | ST | benign            |
| rs13255101 | NP_003792 | K | N | KN | benign            |
| rs13255110 | XP_372063 | K | E | KE | benign            |
| rs13255674 | XP_498268 | T | A | TA | benign            |
| rs13255694 | NP_003808 | V | M | VM | benign            |
| rs13255719 | XP_498268 | E | G | EG | benign            |
| rs13255844 | XP_088376 | G | E | GE | benign            |
| rs13256683 | XP_498289 | R | S | RS | benign            |
| rs13257512 | NP_079107 | D | A | DA | benign            |
| rs13259668 | NP_003808 | N | H | NH | benign            |
| rs13260331 | NP_473369 | A | V | AV | benign            |
| rs13260439 | XP_372063 | D | N | DN | benign            |
| rs13263056 | NP_056069 | R | L | RL | possibly damaging |
| rs13263632 | NP_004306 | S | N | SN | benign            |
| rs13264294 | NP_998785 | L | F | LF | benign            |
| rs13264294 | NP_998784 | L | F | LF | possibly damaging |
| rs13264624 | NP_612474 | S | C | SC | possibly damaging |
| rs13265018 | NP_003833 | A | V | AV | benign            |
| rs13265557 | NP_061971 | I | V | IV | benign            |
| rs13266400 | XP_496990 | I | S | IS | benign            |
| rs13266634 | NP_776250 | R | W | RW | possibly damaging |
| rs13267286 | NP_116166 | A | D | AD | possibly damaging |



|            |           |   |   |    |                   |
|------------|-----------|---|---|----|-------------------|
| rs13268757 | NP_015628 | C | R | CR | possibly damaging |
| rs13269488 | XP_291277 | G | S | GS | benign            |
| rs13270305 | NP_003869 | A | T | AT | benign            |
| rs13272376 | XP_291277 | G | C | GC | probably damaging |
| rs13272703 | XP_498268 | L | V | LV | benign            |
| rs13272825 | NP_056235 | N | S | NS | benign            |
| rs13276522 | NP_056235 | S | I | SI | benign            |
| rs13277260 | NP_005363 | Q | H | QH | possibly damaging |
| rs13277386 | NP_659441 | K | N | KN | benign            |
| rs13277542 | XP_496997 | E | A | EA | benign            |
| rs13277743 | NP_006794 | Y | H | YH | possibly damaging |
| rs13277889 | XP_209918 | K | R | KR | benign            |
| rs13278059 | NP_056235 | S | R | SR | benign            |
| rs13278958 | NP_000016 | P | T | PT | possibly damaging |
| rs13278959 | XP_373243 | E | K | EK | benign            |
| rs13279787 | XP_372035 | S | N | SN | benign            |
| rs13280248 | NP_631906 | S | P | SP | possibly damaging |
| rs13280377 | NP_003738 | E | K | EK | benign            |
| rs13280535 | NP_689775 | P | L | PL | probably damaging |
| rs13280993 | NP_003059 | T | I | TI | probably damaging |
| rs13282485 | NP_054831 | P | L | PL | probably damaging |
| rs13283110 | NP_001798 | Y | F | YF | benign            |
| rs13283456 | NP_945178 | R | H | RH | benign            |
| rs13283456 | NP_079348 | R | H | RH | benign            |
| rs13284404 | NP_006369 | A | T | AT | benign            |
| rs13284539 | NP_995581 | I | N | IN | possibly damaging |
| rs13285586 | XP_088551 | P | L | PL | probably damaging |
| rs13285778 | NP_995581 | I | F | IF | benign            |
| rs13286264 | NP_443098 | A | G | AG | benign            |
| rs13286264 | NP_640329 | A | G | AG | benign            |
| rs13286264 | NP_644669 | A | G | AG | benign            |
| rs13286304 | NP_078994 | T | M | TM | benign            |
| rs13287599 | NP_060719 | F | L | FL | possibly damaging |
| rs13287734 | NP_060719 | A | P | AP | benign            |
| rs13287876 | NP_060719 | A | V | AV | benign            |
| rs13288833 | NP_055876 | V | G | VG | probably damaging |
| rs13289566 | NP_060046 | G | E | GE | benign            |
| rs13290391 | NP_060132 | F | L | FL | benign            |
| rs13291847 | NP_001384 | S | Y | SY | benign            |
| rs13292106 | XP_114685 | D | H | DH | possibly damaging |
| rs13292341 | NP_775960 | Q | H | QH | benign            |
| rs13292348 | NP_775960 | S | I | SI | benign            |
| rs13293047 | NP_001384 | E | Q | EQ | benign            |
| rs13294000 | NP_063945 | K | R | KR | benign            |
| rs13294031 | NP_076918 | L | H | LH | probably damaging |
| rs13294031 | NP_008831 | L | H | LH | probably damaging |

|            |           |   |   |    |                   |
|------------|-----------|---|---|----|-------------------|
| rs13294411 | XP_210755 | L | V | LV | benign            |
| rs13294424 | XP_036708 | D | E | DE | benign            |
| rs13294485 | NP_076918 | L | F | LF | benign            |
| rs13294485 | NP_008831 | L | F | LF | benign            |
| rs13294702 | XP_499132 | T | K | TK | benign            |
| rs13295305 | NP_872441 | R | K | RK | benign            |
| rs13296760 | NP_073616 | D | Y | DY | probably damaging |
| rs13297924 | NP_001384 | D | V | DV | possibly damaging |
| rs13298061 | NP_001384 | T | P | TP | benign            |
| rs13298220 | NP_612206 | S | W | SW | probably damaging |
| rs13298307 | NP_006280 | L | F | LF | benign            |
| rs13298317 | NP_006280 | A | V | AV | benign            |
| rs13298638 | NP_008936 | T | A | TA | possibly damaging |
| rs13298768 | NP_659402 | E | G | EG | possibly damaging |
| rs13298809 | NP_006079 | Q | P | QP | probably damaging |
| rs13298980 | NP_006327 | F | L | FL | possibly damaging |
| rs13299596 | NP_758516 | A | T | AT | benign            |
| rs13299619 | NP_758516 | A | T | AT | benign            |
| rs13299619 | NP_036568 | A | T | AT | benign            |
| rs13299702 | NP_006327 | T | I | TI | benign            |
| rs13299765 | NP_758516 | D | N | DN | benign            |
| rs13299765 | NP_036568 | D | N | DN | benign            |
| rs13300770 | XP_499132 | E | A | EA | benign            |
| rs13302050 | NP_005824 | T | P | TP | possibly damaging |
| rs13302059 | NP_005824 | P | A | PA | probably damaging |
| rs13302273 | NP_005824 | D | N | DN | benign            |
| rs13302347 | NP_940871 | D | E | DE | benign            |
| rs13302671 | XP_291315 | H | Q | HQ | benign            |
| rs13302727 | NP_001689 | A | G | AG | benign            |
| rs13302733 | NP_001689 | A | G | AG | benign            |
| rs13303083 | XP_372193 | S | I | SI | benign            |
| rs13305975 | NP_061822 | R | H | RH | possibly damaging |
| rs13305979 | NP_005298 | D | H | DH | possibly damaging |
| rs13305979 | NP_892027 | D | H | DH | possibly damaging |
| rs13305987 | NP_006163 | A | V | AV | benign            |
| rs13305993 | NP_077720 | G | R | GR | possibly damaging |
| rs13305994 | NP_077720 | A | E | AE | benign            |
| rs13306001 | NP_000897 | R | L | RL | probably damaging |
| rs13306014 | NP_942013 | N | S | NS | benign            |
| rs13306020 | NP_000948 | T | M | TM | benign            |
| rs13306020 | NP_942005 | T | M | TM | benign            |
| rs13306020 | NP_942008 | T | M | TM | benign            |
| rs13306020 | NP_942009 | T | M | TM | benign            |
| rs13306020 | NP_942010 | T | M | TM | benign            |
| rs13306020 | NP_942011 | T | M | TM | benign            |
| rs13306020 | NP_942006 | T | M | TM | benign            |

|            |           |   |   |    |                   |
|------------|-----------|---|---|----|-------------------|
| rs13306020 | NP_942013 | T | M | TM | benign            |
| rs13306023 | NP_000952 | M | T | MT | benign            |
| rs13306030 | NP_000952 | K | T | KT | benign            |
| rs13306039 | NP_001034 | A | P | AP | benign            |
| rs13306041 | NP_001034 | R | Q | RQ | possibly damaging |
| rs13306050 | NP_001052 | P | L | PL | probably damaging |
| rs13306052 | NP_001052 | V | M | VM | benign            |
| rs13306052 | NP_112246 | V | M | VM | benign            |
| rs13306055 | NP_001052 | R | K | RK | benign            |
| rs13306055 | NP_112246 | R | K | RK | benign            |
| rs13306057 | NP_009048 | G | S | GS | benign            |
| rs13306060 | NP_003292 | I | M | IM | benign            |
| rs13306068 | NP_005493 | I | V | IV | benign            |
| rs13306072 | NP_005493 | V | I | VI | benign            |
| rs13306073 | NP_005493 | V | I | VI | benign            |
| rs13306085 | NP_000780 | R | Q | RQ | benign            |
| rs13306087 | NP_000780 | A | T | AT | benign            |
| rs13306091 | NP_000780 | M | T | MT | possibly damaging |
| rs13306091 | NP_690044 | M | T | MT | probably damaging |
| rs13306091 | NP_690043 | M | T | MT | probably damaging |
| rs13306092 | NP_054909 | R | H | RH | benign            |
| rs13306092 | NP_054908 | R | H | RH | possibly damaging |
| rs13306092 | NP_789771 | R | H | RH | possibly damaging |
| rs13306092 | NP_001110 | R | H | RH | possibly damaging |
| rs13306093 | NP_054908 | P | L | PL | benign            |
| rs13306093 | NP_001110 | P | L | PL | benign            |
| rs13306143 | NP_000672 | G | S | GS | benign            |
| rs13306151 | NP_000016 | P | L | PL | benign            |
| rs13306155 | NP_000020 | T | P | TP | possibly damaging |
| rs13306168 | NP_001131 | Y | H | YH | possibly damaging |
| rs13306187 | NP_000375 | R | H | RH | benign            |
| rs13306191 | NP_000375 | E | K | EK | benign            |
| rs13306192 | NP_000375 | F | V | FV | possibly damaging |
| rs13306194 | NP_000375 | R | W | RW | possibly damaging |
| rs13306198 | NP_000375 | T | M | TM | benign            |
| rs13306204 | NP_000375 | N | H | NH | benign            |
| rs13306206 | NP_000375 | P | S | PS | possibly damaging |
| rs13306224 | NP_001732 | Q | P | QP | possibly damaging |
| rs13306251 | NP_001827 | T | M | TM | probably damaging |
| rs13306252 | NP_001827 | R | H | RH | benign            |
| rs13306279 | NP_009294 | P | L | PL | probably damaging |
| rs13306281 | NP_009294 | V | M | VM | benign            |
| rs13306287 | NP_006578 | Q | R | QR | benign            |
| rs13306293 | NP_000092 | A | T | AT | benign            |
| rs13306297 | NP_000092 | R | Q | RQ | benign            |
| rs13306300 | NP_000388 | G | S | GS | benign            |

|            |           |   |   |    |                   |
|------------|-----------|---|---|----|-------------------|
| rs13306301 | NP_000778 | D | N | DN | benign            |
| rs13306303 | NP_000778 | T | M | TM | possibly damaging |
| rs13306306 | NP_000778 | R | W | RW | probably damaging |
| rs13306309 | NP_000785 | A | T | AT | benign            |
| rs13306333 | NP_000121 | H | R | HR | possibly damaging |
| rs13306334 | NP_000121 | L | F | LF | benign            |
| rs13306350 | NP_000121 | S | R | SR | benign            |
| rs13306364 | NP_002017 | I | L | IL | benign            |
| rs13306364 | NP_997639 | I | L | IL | benign            |
| rs13306364 | NP_997640 | I | L | IL | benign            |
| rs13306364 | NP_997641 | I | L | IL | benign            |
| rs13306364 | NP_997643 | I | L | IL | benign            |
| rs13306364 | NP_997647 | I | L | IL | benign            |
| rs13306372 | NP_002017 | G | S | GS | possibly damaging |
| rs13306372 | NP_473375 | G | S | GS | possibly damaging |
| rs13306372 | NP_997639 | G | S | GS | possibly damaging |
| rs13306372 | NP_997640 | G | S | GS | possibly damaging |
| rs13306372 | NP_997641 | G | S | GS | possibly damaging |
| rs13306372 | NP_997643 | G | S | GS | possibly damaging |
| rs13306372 | NP_997647 | G | S | GS | possibly damaging |
| rs13306395 | NP_000155 | E | Q | EQ | benign            |
| rs13306398 | NP_000155 | G | C | GC | probably damaging |
| rs13306399 | NP_000155 | C | S | CS | probably damaging |
| rs13306402 | NP_000155 | R | W | RW | probably damaging |
| rs13306403 | NP_000155 | R | L | RL | possibly damaging |
| rs13306411 | NP_000164 | L | F | LF | benign            |
| rs13306418 | NP_002094 | M | V | MV | benign            |
| rs13306425 | NP_000187 | R | H | RH | possibly damaging |
| rs13306430 | NP_000192 | R | Q | RQ | benign            |
| rs13306432 | NP_000864 | Q | L | QL | probably damaging |
| rs13306435 | NP_000591 | D | E | DE | benign            |
| rs13306449 | NP_000199 | Y | C | YC | probably damaging |
| rs13306466 | NP_005535 | P | A | PA | probably damaging |
| rs13306467 | NP_005535 | P | R | PR | probably damaging |
| rs13306469 | NP_005535 | G | S | GS | benign            |
| rs13306470 | NP_005535 | R | L | RL | probably damaging |
| rs13306473 | NP_000410 | V | M | VM | benign            |
| rs13306476 | NP_000203 | H | P | HP | possibly damaging |
| rs13306487 | NP_000203 | R | Q | RQ | benign            |
| rs13306505 | NP_000518 | A | V | AV | possibly damaging |
| rs13306510 | NP_000518 | P | S | PS | benign            |
| rs13306526 | NP_002294 | I | V | IV | benign            |
| rs13306543 | NP_002436 | T | I | TI | possibly damaging |
| rs13306543 | NP_619730 | T | I | TI | possibly damaging |
| rs13306543 | NP_619729 | T | I | TI | possibly damaging |
| rs13306549 | NP_002436 | E | K | EK | benign            |

|            |           |   |   |    |                   |
|------------|-----------|---|---|----|-------------------|
| rs13306549 | NP_619730 | E | K | EK | benign            |
| rs13306549 | NP_619729 | E | K | EK | benign            |
| rs13306575 | NP_000424 | R | W | RW | possibly damaging |
| rs13306581 | NP_000424 | T | M | TM | possibly damaging |
| rs13306591 | NP_000892 | R | H | RH | benign            |
| rs13306592 | NP_000892 | F | Y | FY | benign            |
| rs13306603 | NP_005613 | D | H | DH | probably damaging |
| rs13306603 | NP_973729 | D | H | DH | probably damaging |
| rs13306608 | NP_005613 | H | P | HP | probably damaging |
| rs13306615 | NP_001029 | A | T | AT | possibly damaging |
| rs13306616 | NP_001029 | P | H | PH | possibly damaging |
| rs13306627 | NP_000327 | R | Q | RQ | benign            |
| rs13306629 | NP_000327 | S | N | SN | benign            |
| rs13306644 | NP_002969 | E | Q | EQ | benign            |
| rs13306651 | NP_002969 | A | T | AT | benign            |
| rs13306664 | NP_001030 | I | F | IF | benign            |
| rs13306668 | NP_000330 | R | H | RH | possibly damaging |
| rs13306698 | NP_000437 | R | G | RG | probably damaging |
| rs13306699 | NP_000296 | S | F | SF | benign            |
| rs13306731 | NP_003092 | R | Q | RQ | benign            |
| rs13306744 | NP_004167 | L | V | LV | benign            |
| rs13306754 | NP_006507 | R | L | RL | probably damaging |
| rs13306763 | NP_001033 | S | A | SA | possibly damaging |
| rs13306771 | NP_003030 | V | M | VM | benign            |
| rs13306774 | NP_000333 | R | C | RC | probably damaging |
| rs13306776 | NP_000333 | R | H | RH | probably damaging |
| rs13306787 | NP_000333 | E | K | EK | benign            |
| rs13306788 | NP_000333 | E | D | ED | benign            |
| rs13306799 | NP_006206 | S | L | SL | benign            |
| rs13306846 | NP_000593 | Y | C | YC | probably damaging |
| rs13306921 | NP_076972 | S | R | SR | possibly damaging |
| rs13307048 | XP_372002 | W | L | WL | benign            |
| rs13308178 | XP_498189 | G | R | GR | probably damaging |
| rs13308235 | XP_376658 | S | P | SP | possibly damaging |
| rs13308796 | XP_499090 | A | D | AD | possibly damaging |
| rs13308800 | XP_499090 | R | G | RG | possibly damaging |
| rs13308841 | XP_499090 | A | V | AV | benign            |
| rs13308996 | XP_498195 | H | L | HL | benign            |
| rs13309158 | NP_006707 | I | L | IL | benign            |
| rs13309268 | NP_006707 | R | Q | RQ | benign            |
| rs13309334 | NP_000836 | R | Q | RQ | benign            |
| rs13309462 | XP_088118 | E | K | EK | benign            |
| rs13309509 | XP_088142 | K | N | KN | benign            |
| rs13309557 | NP_055319 | P | L | PL | probably damaging |
| rs13309561 | NP_006707 | L | P | LP | possibly damaging |
| rs13309640 | NP_004280 | T | S | TS | benign            |

|            |           |   |   |    |                   |
|------------|-----------|---|---|----|-------------------|
| rs13309648 | NP_004280 | Q | R | QR | benign            |
| rs13309707 | NP_004280 | V | I | VI | benign            |
| rs13310227 | XP_166571 | I | L | IL | benign            |
| rs13310406 | XP_498188 | G | V | GV | probably damaging |
| rs13310840 | NP_997056 | R | P | RP | possibly damaging |
| rs13310887 | NP_006370 | T | P | TP | possibly damaging |
| rs13311116 | NP_057122 | T | I | TI | probably damaging |
| rs13311251 | NP_878247 | Q | H | QH | possibly damaging |
| rs13311709 | NP_057122 | K | R | KR | benign            |
| rs13311752 | NP_057562 | A | D | AD | benign            |
| rs13311799 | XP_496849 | A | D | AD | possibly damaging |
| rs13312444 | NP_076972 | S | T | ST | benign            |
| rs13312555 | XP_498195 | P | Q | PQ | benign            |
| rs13312558 | XP_498195 | S | L | SL | benign            |
| rs13312582 | XP_499090 | L | Q | LQ | possibly damaging |
| rs13312633 | NP_006179 | Q | R | QR | possibly damaging |
| rs13312739 | NP_000363 | P | T | PT | possibly damaging |
| rs13312740 | NP_000363 | Q | R | QR | benign            |
| rs13312741 | NP_000363 | D | Y | DY | benign            |
| rs13312744 | NP_000363 | F | S | FS | probably damaging |
| rs13312793 | NP_065689 | P | S | PS | probably damaging |
| rs13312858 | NP_002476 | K | N | KN | benign            |
| rs13313088 | NP_060335 | P | R | PR | probably damaging |
| rs13313279 | NP_954872 | V | G | VG | possibly damaging |
| rs13313279 | NP_061146 | V | G | VG | possibly damaging |
| rs13315504 | NP_003839 | V | L | VL | benign            |
| rs13315830 | NP_653238 | G | A | GA | benign            |
| rs13318110 | NP_003839 | A | T | AT | benign            |
| rs13319149 | NP_886553 | A | T | AT | benign            |
| rs13319149 | NP_937884 | A | T | AT | benign            |
| rs13319149 | NP_937887 | A | T | AT | benign            |
| rs13320167 | XP_497949 | D | H | DH | benign            |
| rs13320393 | XP_047357 | F | L | FL | possibly damaging |
| rs13320485 | NP_006144 | A | V | AV | benign            |
| rs13321615 | NP_001448 | K | Q | KQ | benign            |
| rs13321689 | XP_496642 | T | A | TA | benign            |
| rs13322090 | NP_001870 | V | A | VA | possibly damaging |
| rs13324082 | NP_940865 | S | R | SR | benign            |
| rs13324142 | NP_599025 | V | M | VM | benign            |
| rs13324142 | NP_602298 | V | M | VM | benign            |
| rs13324142 | NP_075062 | V | M | VM | benign            |
| rs13324468 | NP_872395 | A | T | AT | benign            |
| rs13324635 | XP_045290 | V | M | VM | benign            |
| rs13326359 | NP_640338 | A | S | AS | benign            |
| rs13326552 | NP_003232 | R | H | RH | benign            |
| rs13327031 | NP_060169 | G | R | GR | possibly damaging |

|            |           |   |   |    |                   |
|------------|-----------|---|---|----|-------------------|
| rs13327092 | NP_004177 | M | L | ML | benign            |
| rs13327456 | XP_371614 | M | V | MV | possibly damaging |
| rs13328658 | NP_059992 | T | P | TP | possibly damaging |
| rs13328658 | NP_150643 | T | P | TP | possibly damaging |
| rs13328658 | NP_004622 | T | P | TP | possibly damaging |
| rs13328900 | NP_055022 | V | A | VA | benign            |
| rs13329897 | NP_694570 | S | L | SL | benign            |
| rs13330140 | NP_653206 | E | K | EK | benign            |
| rs13330462 | NP_006101 | G | D | GD | possibly damaging |
| rs13330686 | NP_000237 | S | L | SL | benign            |
| rs13331152 | XP_497481 | R | C | RC | probably damaging |
| rs13331394 | NP_006653 | E | G | EG | possibly damaging |
| rs13332099 | XP_058743 | R | C | RC | benign            |
| rs13332289 | NP_570967 | H | R | HR | probably damaging |
| rs13332291 | NP_060009 | T | M | TM | possibly damaging |
| rs13332460 | XP_372607 | A | S | AS | benign            |
| rs13332463 | NP_060676 | C | S | CS | probably damaging |
| rs13332760 | NP_001080 | V | F | VF | possibly damaging |
| rs13333142 | XP_375357 | D | V | DV | probably damaging |
| rs13333553 | NP_000287 | W | R | WR | probably damaging |
| rs13333709 | XP_370982 | S | I | SI | probably damaging |
| rs13333805 | XP_091331 | S | F | SF | benign            |
| rs13333991 | XP_370924 | L | F | LF | benign            |
| rs13334011 | NP_060210 | V | I | VI | benign            |
| rs13335256 | NP_005144 | Q | H | QH | possibly damaging |
| rs13336024 | XP_497522 | I | T | IT | benign            |
| rs13336114 | NP_005844 | P | T | PT | benign            |
| rs13336129 | NP_002959 | S | G | SG | benign            |
| rs13336566 | NP_000126 | Q | R | QR | benign            |
| rs13336804 | NP_000237 | V | A | VA | benign            |
| rs13336969 | NP_005844 | Y | N | YN | probably damaging |
| rs13337123 | NP_000287 | E | D | ED | benign            |
| rs13337258 | NP_005643 | L | V | LV | benign            |
| rs13337278 | NP_694971 | S | T | ST | benign            |
| rs13337489 | NP_063953 | C | S | CS | possibly damaging |
| rs13337489 | NP_063956 | C | S | CS | possibly damaging |
| rs13337489 | NP_004987 | C | S | CS | possibly damaging |
| rs13337489 | NP_063915 | C | S | CS | probably damaging |
| rs13337489 | NP_063954 | C | S | CS | probably damaging |
| rs13337489 | NP_063955 | C | S | CS | probably damaging |
| rs13337489 | NP_063957 | C | S | CS | probably damaging |
| rs13337837 | XP_370924 | P | L | PL | probably damaging |
| rs13338056 | NP_055787 | K | Q | KQ | benign            |
| rs13338179 | NP_620408 | L | P | LP | possibly damaging |
| rs13338179 | NP_001135 | L | P | LP | possibly damaging |
| rs13338340 | NP_958933 | R | Q | RQ | benign            |

|            |           |   |   |    |                   |
|------------|-----------|---|---|----|-------------------|
| rs13338340 | NP_958932 | R | Q | RQ | benign            |
| rs13338340 | NP_005673 | R | Q | RQ | benign            |
| rs13338753 | NP_659461 | R | W | RW | probably damaging |
| rs13338940 | NP_055959 | G | A | GA | benign            |
| rs13339342 | NP_877417 | R | H | RH | benign            |
| rs13339649 | NP_065769 | I | T | IT | possibly damaging |
| rs13339902 | NP_003872 | G | E | GE | possibly damaging |
| rs13342692 | NP_699188 | D | G | DG | benign            |
| rs13343419 | XP_371155 | R | Q | RQ | probably damaging |
| rs13343440 | NP_006838 | N | D | ND | benign            |
| rs13343537 | NP_005082 | H | Q | HQ | benign            |
| rs13343617 | NP_002437 | E | G | EG | benign            |
| rs13343641 | NP_653285 | P | S | PS | benign            |
| rs13343833 | XP_371155 | T | M | TM | benign            |
| rs13344350 | XP_058967 | R | W | RW | probably damaging |
| rs13344462 | XP_209163 | E | K | EK | benign            |
| rs13344609 | XP_290867 | F | L | FL | benign            |
| rs13345394 | NP_112163 | A | T | AT | benign            |
| rs13345452 | XP_375563 | T | M | TM | benign            |
| rs13346484 | NP_006855 | G | R | GR | benign            |
| rs13347042 | NP_115799 | S | N | SN | benign            |
| rs13347174 | NP_742111 | G | V | GV | possibly damaging |
| rs13347174 | NP_742110 | G | V | GV | possibly damaging |
| rs13347177 | NP_060622 | E | K | EK | benign            |
| rs13349455 | XP_376318 | R | K | RK | benign            |
| rs13354726 | NP_150377 | A | V | AV | benign            |
| rs13359508 | NP_003109 | N | S | NS | benign            |
| rs13360277 | NP_057374 | C | R | CR | probably damaging |
| rs13361416 | NP_001728 | I | V | IV | benign            |
| rs13362036 | NP_078841 | H | Y | HY | benign            |
| rs13362755 | NP_061978 | E | G | EG | possibly damaging |
| rs13373934 | NP_060959 | S | P | SP | benign            |
| rs13374146 | NP_694986 | V | A | VA | benign            |
| rs13374149 | NP_000060 | R | H | RH | benign            |
| rs13374337 | NP_950245 | I | T | IT | possibly damaging |
| rs13374920 | NP_004275 | E | A | EA | benign            |
| rs13375609 | NP_065867 | V | I | VI | benign            |
| rs13375701 | NP_219486 | K | M | KM | benign            |
| rs13375867 | NP_919268 | A | V | AV | benign            |
| rs13376095 | XP_048104 | E | D | ED | benign            |
| rs13376115 | NP_005790 | A | P | AP | benign            |
| rs13376115 | NP_795352 | A | P | AP | benign            |
| rs13376115 | NP_795353 | A | P | AP | benign            |
| rs13376441 | XP_496406 | R | S | RS | possibly damaging |
| rs13376679 | NP_003026 | H | R | HR | possibly damaging |
| rs13376770 | XP_499190 | Q | H | QH | benign            |



|            |           |   |   |    |                   |
|------------|-----------|---|---|----|-------------------|
| rs13377015 | XP_499190 | P | L | PL | probably damaging |
| rs13377147 | XP_499190 | R | G | RG | possibly damaging |
| rs13377895 | XP_495906 | L | M | LM | benign            |
| rs13377933 | NP_000776 | S | N | SN | benign            |
| rs13378079 | NP_006592 | S | F | SF | possibly damaging |
| rs13379165 | NP_057735 | I | R | IR | benign            |
| rs13380059 | NP_002411 | R | H | RH | benign            |
| rs13380232 | NP_057278 | G | R | GR | possibly damaging |
| rs13380233 | XP_496026 | P | L | PL | possibly damaging |
| rs13381457 | NP_817123 | A | T | AT | benign            |
| rs13381670 | NP_000262 | T | M | TM | possibly damaging |
| rs13381941 | NP_443143 | T | M | TM | benign            |
| rs13382105 | NP_005806 | I | V | IV | benign            |
| rs13383830 | NP_056532 | N | D | ND | benign            |
| rs13383900 | NP_055312 | A | V | AV | benign            |
| rs13384181 | XP_087225 | P | S | PS | possibly damaging |
| rs13384912 | NP_060220 | P | T | PT | possibly damaging |
| rs13385919 | NP_116168 | R | Q | RQ | benign            |
| rs13385963 | NP_060733 | L | P | LP | possibly damaging |
| rs13386425 | NP_859064 | V | I | VI | benign            |
| rs13387262 | NP_061949 | A | V | AV | benign            |
| rs13387430 | XP_371569 | S | N | SN | benign            |
| rs13387859 | NP_005292 | V | M | VM | benign            |
| rs13388310 | NP_079540 | D | N | DN | benign            |
| rs13388394 | NP_733772 | T | A | TA | benign            |
| rs13389423 | NP_000456 | S | F | SF | benign            |
| rs13389670 | NP_940885 | R | K | RK | benign            |
| rs13389745 | NP_055962 | I | V | IV | benign            |
| rs13389902 | NP_004481 | S | I | SI | possibly damaging |
| rs13390084 | NP_872327 | M | V | MV | benign            |
| rs13390456 | NP_060621 | S | Y | SY | benign            |
| rs13391172 | NP_055429 | L | Q | LQ | possibly damaging |
| rs13391626 | NP_004516 | V | G | VG | possibly damaging |
| rs13391909 | NP_005786 | F | L | FL | benign            |
| rs13392197 | NP_115642 | H | Y | HY | benign            |
| rs13392701 | NP_000514 | N | K | NK | benign            |
| rs13393659 | NP_060422 | A | V | AV | benign            |
| rs13394919 | NP_001956 | Q | H | QH | benign            |
| rs13395008 | XP_497876 | V | M | VM | benign            |
| rs13395348 | XP_372911 | H | D | HD | probably damaging |
| rs13396066 | NP_995319 | V | A | VA | possibly damaging |
| rs13396449 | NP_060628 | L | I | LI | benign            |
| rs13396788 | XP_291015 | M | R | MR | probably damaging |
| rs13397243 | NP_065725 | F | L | FL | possibly damaging |
| rs13397243 | NP_803882 | F | L | FL | probably damaging |
| rs13398588 | XP_056455 | E | G | EG | possibly damaging |

|            |           |   |   |    |                   |
|------------|-----------|---|---|----|-------------------|
| rs13399067 | NP_872578 | S | L | SL | benign            |
| rs13400205 | NP_001025 | V | G | VG | probably damaging |
| rs13400348 | XP_372911 | Q | H | QH | benign            |
| rs13401215 | NP_000989 | M | R | MR | benign            |
| rs13401480 | NP_056472 | R | C | RC | probably damaging |
| rs13401480 | NP_775099 | R | C | RC | probably damaging |
| rs13402131 | NP_776183 | R | G | RG | benign            |
| rs13402964 | NP_005680 | R | Q | RQ | benign            |
| rs13403488 | XP_499216 | E | Q | EQ | benign            |
| rs13403699 | XP_372911 | M | L | ML | benign            |
| rs13403700 | XP_372911 | E | D | ED | benign            |
| rs13404469 | NP_775816 | L | F | LF | benign            |
| rs13405631 | NP_003845 | I | T | IT | benign            |
| rs13405977 | NP_112734 | K | R | KR | benign            |
| rs13406336 | NP_001096 | A | G | AG | benign            |
| rs13406898 | NP_061966 | T | I | TI | benign            |
| rs13407355 | NP_003485 | L | V | LV | benign            |
| rs13407858 | XP_209509 | V | A | VA | benign            |
| rs13408366 | NP_002798 | R | K | RK | benign            |
| rs13408961 | NP_000021 | A | T | AT | benign            |
| rs13409059 | XP_046570 | E | K | EK | benign            |
| rs13409084 | NP_542402 | G | S | GS | benign            |
| rs13409340 | NP_443134 | E | V | EV | possibly damaging |
| rs13409362 | XP_371595 | G | D | GD | benign            |
| rs13411304 | XP_372924 | S | L | SL | possibly damaging |
| rs13411834 | NP_061720 | P | L | PL | probably damaging |
| rs13412067 | XP_371569 | P | A | PA | probably damaging |
| rs13412604 | XP_376062 | L | W | LW | benign            |
| rs13413205 | NP_620072 | G | V | GV | probably damaging |
| rs13413318 | NP_004062 | R | K | RK | benign            |
| rs13413353 | NP_004062 | D | N | DN | benign            |
| rs13414108 | NP_055744 | E | D | ED | benign            |
| rs13414223 | NP_061854 | L | I | LI | benign            |
| rs13414422 | XP_051017 | R | P | RP | possibly damaging |
| rs13414448 | NP_056472 | G | D | GD | possibly damaging |
| rs13414448 | NP_775099 | G | D | GD | possibly damaging |
| rs13415309 | XP_050846 | R | P | RP | possibly damaging |
| rs13415574 | NP_061720 | E | K | EK | benign            |
| rs13415748 | XP_208281 | G | A | GA | possibly damaging |
| rs13415750 | XP_208281 | G | R | GR | probably damaging |
| rs13416414 | NP_064602 | A | V | AV | benign            |
| rs13416540 | NP_064602 | L | F | LF | possibly damaging |
| rs13416916 | NP_055429 | L | M | LM | benign            |
| rs13417812 | NP_689737 | E | A | EA | benign            |
| rs13418352 | XP_208281 | A | P | AP | possibly damaging |
| rs13419020 | NP_006742 | R | W | RW | possibly damaging |

|            |           |   |   |    |                   |
|------------|-----------|---|---|----|-------------------|
| rs13419085 | NP_775919 | N | S | NS | benign            |
| rs13419724 | XP_047707 | T | S | TS | benign            |
| rs13420186 | NP_060696 | E | D | ED | benign            |
| rs13420401 | NP_075408 | L | M | LM | benign            |
| rs13420401 | NP_004073 | L | M | LM | benign            |
| rs13420841 | NP_054900 | D | N | DN | possibly damaging |
| rs13420911 | NP_775100 | M | I | MI | benign            |
| rs13421084 | XP_043492 | G | S | GS | benign            |
| rs13422744 | XP_043492 | L | I | LI | benign            |
| rs13423662 | NP_005270 | A | V | AV | benign            |
| rs13423837 | NP_057336 | E | K | EK | benign            |
| rs13424243 | NP_112734 | G | R | GR | possibly damaging |
| rs13424350 | NP_060903 | E | K | EK | benign            |
| rs13424518 | XP_049952 | S | F | SF | possibly damaging |
| rs13424561 | NP_003951 | E | K | EK | benign            |
| rs13424615 | NP_003870 | L | I | LI | benign            |
| rs13424709 | NP_008851 | Q | R | QR | possibly damaging |
| rs13424808 | XP_371494 | P | L | PL | benign            |
| rs13425372 | NP_114034 | H | L | HL | probably damaging |
| rs13425372 | NP_002365 | H | L | HL | probably damaging |
| rs13427480 | NP_004295 | R | K | RK | benign            |
| rs13427561 | NP_659415 | L | W | LW | benign            |
| rs13427953 | NP_084656 | D | H | DH | probably damaging |
| rs13427953 | NP_084657 | D | H | DH | probably damaging |
| rs13427953 | NP_005261 | D | H | DH | probably damaging |
| rs13427953 | NP_084655 | D | H | DH | probably damaging |
| rs13428956 | NP_036316 | L | R | LR | possibly damaging |
| rs13431173 | NP_000538 | M | V | MV | benign            |
| rs13431173 | NP_783650 | M | V | MV | benign            |
| rs13431173 | NP_783651 | M | V | MV | benign            |
| rs13431173 | NP_783652 | M | V | MV | benign            |
| rs13431173 | NP_783653 | M | V | MV | benign            |
| rs13431847 | XP_291016 | T | A | TA | benign            |
| rs13433190 | NP_443202 | A | S | AS | benign            |
| rs13433428 | NP_003094 | L | S | LS | benign            |
| rs13433428 | NP_115571 | S | L | SL | benign            |
| rs13433428 | NP_478063 | S | L | SL | benign            |
| rs13433428 | NP_620304 | S | L | SL | benign            |
| rs13433428 | NP_620305 | S | L | SL | benign            |
| rs13434465 | NP_003492 | D | N | DN | benign            |
| rs13436341 | NP_066550 | T | P | TP | possibly damaging |
| rs13436518 | NP_002145 | S | F | SF | possibly damaging |
| rs13436553 | NP_056103 | R | L | RL | possibly damaging |
| rs13437138 | NP_003889 | E | G | EG | benign            |
| rs13437446 | NP_996736 | V | F | VF | benign            |
| rs13437446 | NP_996737 | V | F | VF | benign            |

|            |           |   |   |    |                   |
|------------|-----------|---|---|----|-------------------|
| rs13437446 | NP_996735 | V | F | VF | benign            |
| rs13437446 | NP_006766 | V | F | VF | benign            |
| rs13437719 | XP_374625 | K | Q | KQ | benign            |
| rs13437720 | XP_374625 | Q | R | QR | benign            |
| rs13438232 | NP_000074 | P | L | PL | probably damaging |
| rs13440241 | XP_035953 | D | N | DN | benign            |
| rs13440436 | NP_996830 | T | I | TI | benign            |
| rs13440436 | NP_996829 | T | I | TI | benign            |
| rs13440436 | NP_066003 | T | I | TI | benign            |
| rs13440436 | NP_996828 | T | I | TI | benign            |
| rs13440436 | NP_996827 | T | I | TI | benign            |
| rs13440436 | NP_079247 | T | I | TI | benign            |
| rs13445539 | NP_055405 | S | N | SN | benign            |
| rs13447203 | NP_003495 | V | I | VI | benign            |
| rs13447263 | NP_003495 | V | M | VM | benign            |
| rs13447323 | NP_005903 | S | F | SF | possibly damaging |
| rs13447325 | NP_005903 | D | V | DV | benign            |
| rs13447326 | NP_005903 | P | L | PL | probably damaging |
| rs13447327 | NP_005903 | S | R | SR | possibly damaging |
| rs13447328 | NP_005903 | V | I | VI | benign            |
| rs13447329 | NP_005903 | T | M | TM | benign            |
| rs13447331 | NP_005903 | S | L | SL | possibly damaging |
| rs13447332 | NP_005903 | R | W | RW | probably damaging |
| rs13447333 | NP_005903 | G | D | GD | possibly damaging |
| rs13447334 | NP_005903 | P | L | PL | probably damaging |
| rs13447335 | NP_005903 | A | E | AE | possibly damaging |
| rs13447336 | NP_005903 | G | S | GS | benign            |
| rs13447337 | NP_005903 | I | T | IT | possibly damaging |
| rs13447459 | NP_003494 | Q | P | QP | benign            |
| rs13447492 | NP_003494 | I | V | IV | benign            |
| rs13447493 | NP_003494 | G | W | GW | probably damaging |
| rs13447503 | NP_003494 | F | L | FL | benign            |
| rs13447539 | NP_003494 | K | R | KR | benign            |
| rs16822531 | NP_002115 | R | Q | RQ | benign            |
| rs16822531 | NP_072049 | R | Q | RQ | benign            |
| rs16822531 | NP_002116 | R | Q | RQ | benign            |
| rs16822554 | NP_002115 | Y | H | YH | benign            |
| rs16822586 | NP_061984 | V | L | VL | benign            |
| rs16822698 | NP_002115 | G | A | GA | benign            |
| rs16822752 | NP_002115 | T | N | TN | benign            |
| rs16822805 | NP_002115 | A | E | AE | benign            |
| rs16822805 | NP_002116 | A | V | AV | benign            |
| rs16822820 | NP_002115 | S | Y | SY | probably damaging |
| rs16822853 | NP_072049 | K | R | KR | benign            |
| rs16822853 | NP_002115 | R | K | RK | benign            |
| rs16822882 | NP_002116 | K | N | KN | benign            |

|            |           |   |   |    |                   |
|------------|-----------|---|---|----|-------------------|
| rs16822884 | NP_002115 | A | V | AV | benign            |
| rs16822884 | NP_002116 | K | M | KM | possibly damaging |
| rs16822977 | NP_002115 | Q | H | QH | benign            |
| rs16822977 | NP_068818 | Q | H | QH | benign            |
| rs16822977 | NP_072049 | Q | H | QH | benign            |
| rs16822977 | NP_002116 | Q | H | QH | benign            |
| rs16822997 | NP_002115 | L | F | LF | benign            |
| rs16823940 | NP_060288 | V | I | VI | benign            |
| rs16823987 | NP_543152 | S | R | SR | benign            |
| rs16823988 | NP_005250 | R | G | RG | probably damaging |
| rs16824179 | NP_079355 | V | M | VM | benign            |
| rs16824215 | NP_037490 | V | M | VM | possibly damaging |
| rs16824283 | XP_051221 | S | R | SR | possibly damaging |
| rs16824588 | XP_372193 | I | V | IV | benign            |
| rs16825359 | NP_277025 | A | V | AV | benign            |
| rs16825359 | NP_277022 | A | V | AV | benign            |
| rs16825377 | NP_115640 | R | Q | RQ | benign            |
| rs16826069 | NP_149033 | I | V | IV | benign            |
| rs16826072 | NP_149033 | T | I | TI | benign            |
| rs16826711 | XP_496394 | Q | E | QE | benign            |
| rs16827032 | NP_653299 | N | D | ND | benign            |
| rs16827426 | NP_000482 | G | E | GE | probably damaging |
| rs16827493 | NP_004541 | P | A | PA | probably damaging |
| rs16827563 | NP_078897 | R | Q | RQ | benign            |
| rs16827883 | NP_079415 | I | T | IT | benign            |
| rs16828159 | NP_002201 | S | A | SA | benign            |
| rs16828983 | NP_001623 | R | L | RL | probably damaging |
| rs16828983 | NP_112603 | R | L | RL | probably damaging |
| rs16829071 | NP_689585 | R | Q | RQ | benign            |
| rs16829083 | NP_689585 | F | L | FL | benign            |
| rs16829204 | NP_067081 | V | I | VI | benign            |
| rs16829208 | NP_005190 | V | I | VI | benign            |
| rs16829216 | NP_005190 | R | H | RH | possibly damaging |
| rs16829813 | NP_038469 | T | N | TN | benign            |
| rs16830057 | NP_060621 | M | R | MR | benign            |
| rs16830171 | NP_004534 | R | P | RP | probably damaging |
| rs16830236 | NP_004534 | N | S | NS | benign            |
| rs16831080 | XP_034717 | H | R | HR | benign            |
| rs16831482 | NP_653300 | M | R | MR | probably damaging |
| rs16831887 | XP_371586 | I | V | IV | benign            |
| rs16832239 | NP_695006 | R | L | RL | benign            |
| rs16832241 | NP_695006 | Q | E | QE | possibly damaging |
| rs16832242 | NP_695006 | Y | S | YS | probably damaging |
| rs16832245 | NP_695006 | Y | C | YC | probably damaging |
| rs16832247 | NP_695006 | A | V | AV | possibly damaging |
| rs16832507 | NP_036354 | W | R | WR | probably damaging |

|            |           |   |   |    |                   |
|------------|-----------|---|---|----|-------------------|
| rs16832595 | NP_003559 | A | T | AT | benign            |
| rs16832602 | NP_003559 | A | T | AT | benign            |
| rs16832611 | NP_003184 | V | A | VA | benign            |
| rs16832619 | NP_003184 | E | G | EG | benign            |
| rs16832629 | NP_689713 | N | S | NS | benign            |
| rs16832645 | NP_787120 | I | T | IT | benign            |
| rs16833032 | NP_002499 | L | V | LV | benign            |
| rs16833035 | NP_055720 | A | P | AP | benign            |
| rs16833060 | NP_002499 | K | E | KE | benign            |
| rs16833154 | NP_002499 | R | H | RH | benign            |
| rs16833183 | NP_002499 | R | H | RH | benign            |
| rs16833336 | NP_065821 | R | C | RC | benign            |
| rs16833349 | NP_065821 | E | G | EG | possibly damaging |
| rs16833395 | NP_064512 | K | R | KR | benign            |
| rs16833413 | XP_291055 | D | N | DN | benign            |
| rs16833517 | NP_078886 | S | A | SA | benign            |
| rs16833597 | NP_872384 | Y | S | YS | probably damaging |
| rs16833884 | XP_375853 | R | H | RH | benign            |
| rs16833953 | XP_375853 | D | G | DG | possibly damaging |
| rs16834186 | XP_114301 | G | S | GS | benign            |
| rs16834197 | XP_379210 | S | I | SI | benign            |
| rs16834559 | NP_005956 | S | P | SP | benign            |
| rs16834559 | NP_444254 | S | P | SP | benign            |
| rs16834559 | NP_444255 | S | P | SP | benign            |
| rs16834559 | NP_444256 | S | P | SP | benign            |
| rs16834559 | NP_444257 | S | P | SP | benign            |
| rs16834559 | NP_444258 | S | P | SP | benign            |
| rs16834559 | NP_444253 | S | P | SP | benign            |
| rs16834603 | NP_658912 | L | F | LF | benign            |
| rs16834961 | NP_004955 | G | A | GA | benign            |
| rs16834984 | XP_114301 | N | D | ND | benign            |
| rs16835228 | XP_060535 | Q | E | QE | benign            |
| rs16835229 | XP_060535 | R | W | RW | probably damaging |
| rs16835244 | NP_443724 | A | S | AS | benign            |
| rs16835270 | NP_001026 | V | I | VI | benign            |
| rs16835624 | NP_006181 | R | Q | RQ | possibly damaging |
| rs16835896 | NP_008995 | N | S | NS | benign            |
| rs16836099 | NP_443128 | L | P | LP | possibly damaging |
| rs16836266 | NP_079076 | V | A | VA | benign            |
| rs16836525 | NP_006547 | V | M | VM | benign            |
| rs16836761 | NP_000148 | E | K | EK | benign            |
| rs16836837 | NP_060959 | L | H | LH | possibly damaging |
| rs16836857 | NP_870988 | Q | P | QP | benign            |
| rs16837438 | NP_005110 | V | A | VA | benign            |
| rs16837497 | XP_371661 | P | L | PL | possibly damaging |
| rs16837598 | NP_714928 | A | V | AV | benign            |

|            |           |   |   |    |                   |
|------------|-----------|---|---|----|-------------------|
| rs16838016 | NP_002230 | K | R | KR | benign            |
| rs16838413 | XP_046570 | H | Y | HY | benign            |
| rs16838742 | XP_092342 | D | H | DH | possibly damaging |
| rs16838748 | NP_112571 | N | K | NK | benign            |
| rs16838944 | NP_001499 | R | C | RC | benign            |
| rs16839100 | NP_110391 | I | N | IN | possibly damaging |
| rs16839102 | NP_000731 | L | P | LP | benign            |
| rs16839215 | XP_497739 | R | G | RG | probably damaging |
| rs16839218 | XP_497739 | G | D | GD | possibly damaging |
| rs16839277 | NP_005885 | D | E | DE | benign            |
| rs16839333 | XP_371352 | H | D | HD | probably damaging |
| rs16840208 | NP_563615 | D | N | DN | benign            |
| rs16840360 | XP_060952 | F | L | FL | possibly damaging |
| rs16840561 | NP_002104 | A | V | AV | benign            |
| rs16840892 | NP_065828 | T | M | TM | possibly damaging |
| rs16840899 | NP_065828 | T | I | TI | benign            |
| rs16840913 | NP_055855 | M | V | MV | benign            |
| rs16840974 | XP_060956 | E | D | ED | benign            |
| rs16840976 | XP_060956 | H | Y | HY | benign            |
| rs16840980 | XP_060956 | G | D | GD | possibly damaging |
| rs16840991 | XP_060956 | S | L | SL | possibly damaging |
| rs16840995 | XP_371573 | E | D | ED | benign            |
| rs16841001 | XP_060956 | R | C | RC | benign            |
| rs16841009 | XP_060956 | C | R | CR | probably damaging |
| rs16841017 | XP_060956 | P | L | PL | probably damaging |
| rs16841018 | NP_061720 | I | V | IV | benign            |
| rs16841038 | XP_060956 | R | Q | RQ | possibly damaging |
| rs16841042 | XP_060956 | H | R | HR | possibly damaging |
| rs16841045 | XP_060956 | K | R | KR | benign            |
| rs16841081 | NP_060606 | S | F | SF | possibly damaging |
| rs16841199 | NP_061720 | N | K | NK | possibly damaging |
| rs16841658 | NP_004783 | N | D | ND | benign            |
| rs16841771 | NP_004279 | Q | E | QE | benign            |
| rs16841932 | XP_496608 | E | K | EK | benign            |
| rs16842171 | NP_001739 | K | Q | KQ | benign            |
| rs16842529 | NP_116176 | T | S | TS | benign            |
| rs16842846 | NP_065840 | R | P | RP | possibly damaging |
| rs16843254 | NP_573569 | E | Q | EQ | benign            |
| rs16843643 | XP_376193 | K | N | KN | benign            |
| rs16843645 | NP_871626 | D | N | DN | benign            |
| rs16843645 | NP_002709 | D | N | DN | benign            |
| rs16843720 | NP_061720 | S | N | SN | benign            |
| rs16843852 | NP_689741 | K | T | KT | possibly damaging |
| rs16844031 | NP_060289 | K | N | KN | benign            |
| rs16844152 | NP_002917 | M | L | ML | benign            |
| rs16844152 | NP_937872 | M | L | ML | benign            |

|            |           |   |   |    |                   |
|------------|-----------|---|---|----|-------------------|
| rs16844152 | NP_940834 | M | L | ML | benign            |
| rs16844275 | NP_073737 | T | I | TI | possibly damaging |
| rs16844370 | NP_001519 | V | M | VM | benign            |
| rs16844401 | NP_001519 | R | H | RH | possibly damaging |
| rs16844422 | NP_775931 | D | N | DN | benign            |
| rs16844444 | NP_714969 | P | S | PS | probably damaging |
| rs16844460 | NP_775931 | R | H | RH | benign            |
| rs16844464 | NP_775931 | P | S | PS | possibly damaging |
| rs16844470 | NP_775931 | R | W | RW | possibly damaging |
| rs16844498 | NP_640333 | M | V | MV | benign            |
| rs16845107 | NP_060808 | K | N | KN | benign            |
| rs16845385 | NP_065101 | T | M | TM | benign            |
| rs16845759 | NP_003801 | D | E | DE | benign            |
| rs16846208 | NP_031374 | S | P | SP | benign            |
| rs16846447 | NP_002212 | S | R | SR | possibly damaging |
| rs16846616 | NP_114161 | G | E | GE | possibly damaging |
| rs16846624 | NP_114161 | N | S | NS | benign            |
| rs16846673 | NP_795345 | E | G | EG | benign            |
| rs16847812 | XP_040527 | D | N | DN | benign            |
| rs16848290 | NP_003276 | I | T | IT | possibly damaging |
| rs16848521 | XP_496601 | R | H | RH | possibly damaging |
| rs16848846 | XP_371352 | R | C | RC | possibly damaging |
| rs16848861 | XP_496446 | H | R | HR | benign            |
| rs16849342 | NP_065176 | Q | H | QH | benign            |
| rs16849379 | NP_065176 | V | I | VI | benign            |
| rs16849439 | NP_001125 | A | G | AG | benign            |
| rs16849611 | NP_057344 | N | S | NS | benign            |
| rs16849661 | NP_061951 | L | I | LI | benign            |
| rs16849670 | NP_009051 | L | V | LV | benign            |
| rs16849700 | NP_000046 | E | D | ED | benign            |
| rs16849902 | XP_087225 | L | I | LI | benign            |
| rs16850984 | NP_066988 | Y | C | YC | probably damaging |
| rs16851307 | NP_079029 | P | S | PS | probably damaging |
| rs16851435 | XP_172341 | S | A | SA | benign            |
| rs16851681 | NP_065186 | R | K | RK | benign            |
| rs16852652 | NP_006606 | E | K | EK | benign            |
| rs16852683 | NP_006606 | M | I | MI | benign            |
| rs16852741 | NP_000456 | S | G | SG | benign            |
| rs16852767 | NP_663735 | S | R | SR | benign            |
| rs16852957 | NP_115502 | E | G | EG | possibly damaging |
| rs16853149 | NP_056472 | E | G | EG | benign            |
| rs16853149 | NP_775099 | E | G | EG | benign            |
| rs16853238 | NP_775099 | W | C | WC | probably damaging |
| rs16853300 | NP_775924 | I | V | IV | benign            |
| rs16853305 | XP_496606 | P | A | PA | probably damaging |
| rs16853306 | XP_496606 | Y | H | YH | benign            |



|            |           |   |   |    |                   |
|------------|-----------|---|---|----|-------------------|
| rs16853309 | XP_496606 | R | H | RH | possibly damaging |
| rs16853326 | XP_496606 | L | R | LR | benign            |
| rs16853328 | XP_496606 | S | N | SN | benign            |
| rs16853329 | XP_496606 | H | Y | HY | benign            |
| rs16853330 | XP_496606 | V | I | VI | benign            |
| rs16853331 | XP_496606 | A | T | AT | benign            |
| rs16853344 | XP_496607 | E | Q | EQ | benign            |
| rs16854277 | XP_496351 | E | K | EK | benign            |
| rs16854411 | XP_293529 | K | E | KE | benign            |
| rs16854557 | XP_496348 | Y | C | YC | probably damaging |
| rs16855035 | NP_055244 | S | W | SW | possibly damaging |
| rs16855059 | NP_976310 | F | S | FS | possibly damaging |
| rs16855164 | NP_055625 | T | A | TA | benign            |
| rs16855211 | XP_087225 | H | Q | HQ | possibly damaging |
| rs16855216 | XP_087225 | Q | K | QK | benign            |
| rs16855466 | NP_002817 | R | P | RP | possibly damaging |
| rs16855539 | XP_371338 | I | T | IT | possibly damaging |
| rs16856462 | NP_443166 | H | R | HR | benign            |
| rs16856462 | NP_599152 | H | R | HR | benign            |
| rs16856681 | XP_086937 | I | T | IT | benign            |
| rs16858033 | NP_060493 | I | V | IV | benign            |
| rs16858264 | NP_072174 | R | P | RP | probably damaging |
| rs16858376 | NP_005805 | K | N | KN | benign            |
| rs16858473 | XP_496667 | T | I | TI | benign            |
| rs16858632 | NP_004944 | Y | C | YC | probably damaging |
| rs16858632 | NP_886553 | Y | C | YC | probably damaging |
| rs16858632 | NP_937884 | Y | C | YC | probably damaging |
| rs16858632 | NP_937885 | Y | C | YC | probably damaging |
| rs16858632 | NP_937887 | Y | C | YC | probably damaging |
| rs16858780 | NP_003732 | M | L | ML | benign            |
| rs16858808 | NP_000625 | R | C | RC | probably damaging |
| rs16858809 | NP_000625 | S | T | ST | possibly damaging |
| rs16858811 | NP_000625 | M | R | MR | benign            |
| rs16859132 | XP_293599 | A | V | AV | benign            |
| rs16859180 | NP_056505 | R | W | RW | probably damaging |
| rs16859190 | NP_078892 | I | V | IV | benign            |
| rs16859487 | NP_079119 | M | T | MT | probably damaging |
| rs16859527 | XP_291080 | R | H | RH | benign            |
| rs16859834 | NP_000800 | L | M | LM | benign            |
| rs16859837 | NP_000800 | A | T | AT | benign            |
| rs16859886 | NP_060887 | T | M | TM | benign            |
| rs16859984 | NP_835221 | T | P | TP | probably damaging |
| rs16860238 | NP_002284 | E | K | EK | benign            |
| rs16860530 | NP_000201 | I | V | IV | benign            |
| rs16861032 | NP_653319 | L | V | LV | benign            |
| rs16861381 | NP_982279 | D | G | DG | possibly damaging |

|            |           |   |   |    |                   |
|------------|-----------|---|---|----|-------------------|
| rs16861394 | NP_982279 | S | F | SF | possibly damaging |
| rs16862215 | NP_003102 | T | A | TA | benign            |
| rs16862234 | XP_374057 | C | R | CR | probably damaging |
| rs16862653 | NP_056993 | R | Q | RQ | benign            |
| rs16862665 | NP_036199 | N | D | ND | possibly damaging |
| rs16862686 | NP_219486 | A | V | AV | benign            |
| rs16863403 | NP_849144 | S | A | SA | benign            |
| rs16863872 | NP_079339 | Y | H | YH | benign            |
| rs16864310 | NP_002012 | R | Q | RQ | probably damaging |
| rs16864314 | NP_002012 | I | V | IV | benign            |
| rs16864976 | NP_003460 | Y | H | YH | possibly damaging |
| rs16865491 | XP_496430 | V | E | VE | possibly damaging |
| rs16865568 | XP_496418 | Q | R | QR | possibly damaging |
| rs16866230 | XP_371595 | M | I | MI | benign            |
| rs16866489 | NP_596870 | S | T | ST | benign            |
| rs16866531 | NP_596870 | I | V | IV | benign            |
| rs16866538 | NP_596870 | R | C | RC | possibly damaging |
| rs16866827 | NP_620154 | T | A | TA | benign            |
| rs16867049 | NP_003174 | R | G | RG | benign            |
| rs16867049 | NP_068604 | R | G | RG | benign            |
| rs16867223 | NP_005671 | R | H | RH | possibly damaging |
| rs16867245 | NP_005671 | T | M | TM | benign            |
| rs16867256 | NP_055367 | N | S | NS | benign            |
| rs16867472 | XP_497892 | A | T | AT | benign            |
| rs16867474 | XP_497892 | V | I | VI | benign            |
| rs16867510 | NP_006742 | A | V | AV | benign            |
| rs16867759 | NP_002107 | F | L | FL | benign            |
| rs16867778 | NP_002107 | E | D | ED | benign            |
| rs16867779 | NP_002107 | R | G | RG | benign            |
| rs16868062 | NP_005505 | P | L | PL | benign            |
| rs16868223 | NP_002107 | A | V | AV | benign            |
| rs16868229 | NP_002107 | N | K | NK | benign            |
| rs16868247 | NP_002107 | F | L | FL | benign            |
| rs16868563 | XP_380121 | M | T | MT | benign            |
| rs16868592 | NP_002112 | F | Y | FY | benign            |
| rs16869301 | XP_371832 | P | S | PS | benign            |
| rs16869407 | XP_498113 | K | E | KE | benign            |
| rs16869581 | XP_376658 | P | A | PA | possibly damaging |
| rs16869924 | NP_443196 | S | G | SG | benign            |
| rs16870005 | NP_006772 | A | T | AT | benign            |
| rs16870204 | NP_002116 | K | T | KT | benign            |
| rs16870206 | NP_002116 | K | E | KE | benign            |
| rs16870720 | NP_775760 | D | V | DV | probably damaging |
| rs16870794 | NP_114106 | G | R | GR | benign            |
| rs16870908 | NP_061313 | L | F | LF | benign            |
| rs16871473 | NP_000940 | I | V | IV | benign            |

|            |           |   |   |    |                   |
|------------|-----------|---|---|----|-------------------|
| rs16871494 | NP_038465 | S | G | SG | benign            |
| rs16871612 | NP_008989 | V | A | VA | benign            |
| rs16872126 | NP_003624 | I | S | IS | possibly damaging |
| rs16872235 | NP_733792 | S | C | SC | possibly damaging |
| rs16872235 | NP_115756 | S | C | SC | possibly damaging |
| rs16872235 | NP_733781 | S | C | SC | possibly damaging |
| rs16872923 | NP_003590 | D | A | DA | probably damaging |
| rs16872923 | NP_852001 | D | A | DA | probably damaging |
| rs16873108 | NP_066024 | C | R | CR | probably damaging |
| rs16873741 | NP_036214 | A | V | AV | benign            |
| rs16874289 | XP_376503 | S | A | SA | benign            |
| rs16874323 | XP_376518 | E | Q | EQ | benign            |
| rs16874326 | NP_067547 | Y | C | YC | probably damaging |
| rs16874464 | XP_498000 | L | I | LI | benign            |
| rs16874698 | NP_004224 | R | Q | RQ | benign            |
| rs16874954 | NP_005075 | V | F | VF | possibly damaging |
| rs16875054 | NP_620687 | A | T | AT | benign            |
| rs16875099 | NP_005579 | T | M | TM | benign            |
| rs16875122 | NP_620687 | R | L | RL | possibly damaging |
| rs16875312 | NP_005573 | N | K | NK | possibly damaging |
| rs16876070 | NP_114399 | E | G | EG | possibly damaging |
| rs16876589 | NP_898861 | G | D | GD | possibly damaging |
| rs16876589 | NP_898862 | G | D | GD | possibly damaging |
| rs16876657 | NP_689618 | H | R | HR | benign            |
| rs16876719 | XP_498277 | E | Q | EQ | benign            |
| rs16876805 | NP_149117 | I | V | IV | benign            |
| rs16877591 | NP_056002 | I | V | IV | benign            |
| rs16877836 | NP_055548 | T | N | TN | benign            |
| rs16878472 | NP_008840 | L | W | LW | benign            |
| rs16878555 | NP_060787 | S | G | SG | benign            |
| rs16878594 | NP_115656 | P | A | PA | benign            |
| rs16878823 | XP_293923 | E | A | EA | benign            |
| rs16878867 | XP_496746 | R | H | RH | benign            |
| rs16878935 | XP_498010 | R | H | RH | possibly damaging |
| rs16879050 | XP_208333 | T | I | TI | benign            |
| rs16879215 | XP_376372 | E | K | EK | benign            |
| rs16879259 | NP_076996 | E | G | EG | possibly damaging |
| rs16879281 | NP_849145 | G | A | GA | benign            |
| rs16879334 | NP_076915 | P | R | PR | possibly damaging |
| rs16879334 | NP_002445 | P | R | PR | possibly damaging |
| rs16879355 | NP_076915 | A | V | AV | benign            |
| rs16879355 | NP_002445 | A | V | AV | benign            |
| rs16879427 | NP_149117 | Q | R | QR | benign            |
| rs16879428 | NP_803875 | W | C | WC | probably damaging |
| rs16879498 | NP_000315 | V | I | VI | benign            |
| rs16879534 | NP_803875 | Y | H | YH | benign            |

|            |              |   |   |    |                   |
|------------|--------------|---|---|----|-------------------|
| rs16879608 | NP_862820    | Q | K | QK | benign            |
| rs16879608 | NP_036513    | Q | K | QK | benign            |
| rs16879659 | NP_803875    | I | V | IV | benign            |
| rs16879693 | NP_803875    | L | F | LF | benign            |
| rs16879902 | NP_005115    | D | N | DN | possibly damaging |
| rs16880254 | NP_000358    | Y | C | YC | probably damaging |
| rs16880543 | NP_004159    | R | H | RH | benign            |
| rs16880853 | NP_116053    | Y | H | YH | benign            |
| rs16880994 | NP_116053    | L | F | LF | benign            |
| rs16881810 | NP_997225    | Q | R | QR | benign            |
| rs16881812 | NP_997225    | R | M | RM | possibly damaging |
| rs16881817 | NP_997225    | I | T | IT | possibly damaging |
| rs16881817 | NP_036581    | I | T | IT | possibly damaging |
| rs16881897 | NP_004280    | P | S | PS | benign            |
| rs16881983 | XP_376519    | Q | E | QE | benign            |
| rs16882024 | NP_065199    | R | W | RW | possibly damaging |
| rs16882046 | NP_055426    | I | T | IT | benign            |
| rs16882099 | NP_055426    | H | D | HD | benign            |
| rs16882924 | NP_000837    | P | S | PS | probably damaging |
| rs16882929 | NP_714543    | V | I | VI | benign            |
| rs16883930 | NP_036566    | V | I | VI | benign            |
| rs16883946 | XP_373214    | A | P | AP | benign            |
| rs16885193 | XP_293923    | S | C | SC | benign            |
| rs16885197 | NP_055279    | T | A | TA | benign            |
| rs16888053 | NP_065121    | Q | R | QR | benign            |
| rs16888722 | NP_115710    | H | R | HR | probably damaging |
| rs16888728 | NP_115710    | P | L | PL | possibly damaging |
| rs16889283 | XP_496990    | G | R | GR | possibly damaging |
| rs16889318 | NP_699201    | L | V | LV | benign            |
| rs16889320 | NP_114130    | N | S | NS | benign            |
| rs16889462 | NP_776250    | R | Q | RQ | benign            |
| rs16890979 | NP_064425    | V | I | VI | benign            |
| rs16890979 | NP_001001290 | V | I | VI | benign            |
| rs16891583 | NP_004189    | N | S | NS | possibly damaging |
| rs16891646 | NP_853509    | P | S | PS | probably damaging |
| rs16891646 | NP_008926    | P | S | PS | probably damaging |
| rs16891982 | NP_057264    | L | F | LF | benign            |
| rs16892095 | XP_106386    | E | A | EA | possibly damaging |
| rs16892134 | XP_106386    | V | I | VI | benign            |
| rs16892150 | NP_055139    | R | Q | RQ | benign            |
| rs16892150 | NP_976316    | R | Q | RQ | benign            |
| rs16892767 | NP_006200    | S | L | SL | possibly damaging |
| rs16893137 | NP_699196    | N | S | NS | benign            |
| rs16894243 | XP_498064    | C | G | CG | probably damaging |
| rs16894246 | XP_498064    | P | L | PL | probably damaging |
| rs16894812 | NP_061165    | K | E | KE | benign            |

|            |           |   |   |    |                   |
|------------|-----------|---|---|----|-------------------|
| rs16894898 | NP_039225 | Y | C | YC | possibly damaging |
| rs16894945 | NP_060224 | K | N | KN | benign            |
| rs16895067 | XP_498081 | D | G | DG | possibly damaging |
| rs16895070 | XP_498081 | C | R | CR | probably damaging |
| rs16895365 | XP_039169 | N | S | NS | benign            |
| rs16895411 | XP_039169 | R | C | RC | possibly damaging |
| rs16895970 | NP_002107 | F | L | FL | benign            |
| rs16895981 | NP_002107 | G | R | GR | benign            |
| rs16896009 | NP_002107 | K | Q | KQ | benign            |
| rs16896012 | NP_002107 | R | H | RH | benign            |
| rs16896015 | NP_002107 | H | L | HL | probably damaging |
| rs16896023 | NP_002107 | L | W | LW | benign            |
| rs16896035 | NP_002107 | E | K | EK | benign            |
| rs16896254 | NP_005505 | S | P | SP | benign            |
| rs16896264 | NP_005505 | Q | L | QL | benign            |
| rs16896268 | NP_002107 | R | T | RT | probably damaging |
| rs16896284 | NP_002107 | R | G | RG | benign            |
| rs16896288 | NP_005505 | Y | C | YC | benign            |
| rs16896294 | NP_002107 | D | E | DE | benign            |
| rs16896595 | NP_002107 | T | S | TS | benign            |
| rs16896605 | NP_005505 | H | Y | HY | benign            |
| rs16896610 | NP_005505 | D | N | DN | benign            |
| rs16896617 | NP_002107 | N | K | NK | benign            |
| rs16896629 | NP_689945 | V | I | VI | benign            |
| rs16896872 | NP_002107 | R | Q | RQ | benign            |
| rs16896879 | NP_002107 | D | Y | DY | benign            |
| rs16896881 | NP_005505 | Y | S | YS | benign            |
| rs16897482 | NP_976034 | L | P | LP | benign            |
| rs16897482 | NP_002692 | L | P | LP | possibly damaging |
| rs16897483 | NP_005922 | E | K | EK | benign            |
| rs16897557 | XP_496799 | W | C | WC | probably damaging |
| rs16897603 | XP_498092 | E | K | EK | benign            |
| rs16897725 | NP_002705 | R | P | RP | possibly damaging |
| rs16897895 | NP_002115 | R | Q | RQ | benign            |
| rs16897895 | NP_068818 | R | Q | RQ | benign            |
| rs16897895 | NP_072049 | R | Q | RQ | benign            |
| rs16897967 | NP_663622 | R | H | RH | possibly damaging |
| rs16898023 | NP_663622 | V | F | VF | possibly damaging |
| rs16898273 | XP_371809 | V | A | VA | benign            |
| rs16898295 | XP_497999 | T | K | TK | benign            |
| rs16898467 | XP_209656 | S | N | SN | benign            |
| rs16898691 | XP_294387 | G | R | GR | benign            |
| rs16898693 | XP_294387 | G | S | GS | benign            |
| rs16898969 | XP_379323 | R | G | RG | possibly damaging |
| rs16898972 | XP_379323 | R | K | RK | benign            |
| rs16899484 | XP_043989 | V | F | VF | benign            |

|            |           |   |   |    |                   |
|------------|-----------|---|---|----|-------------------|
| rs16899606 | NP_005922 | T | I | TI | benign            |
| rs16899974 | NP_114106 | V | L | VL | benign            |
| rs16900023 | NP_079535 | P | S | PS | benign            |
| rs16900023 | NP_751898 | P | S | PS | benign            |
| rs16900023 | NP_751897 | P | S | PS | benign            |
| rs16900532 | NP_004376 | N | K | NK | possibly damaging |
| rs16900603 | NP_079471 | E | D | ED | benign            |
| rs16900991 | NP_660346 | I | V | IV | benign            |
| rs16901277 | NP_060826 | D | E | DE | benign            |
| rs16901311 | NP_005609 | V | M | VM | benign            |
| rs16902381 | NP_079143 | R | K | RK | benign            |
| rs16902381 | NP_653323 | R | K | RK | benign            |
| rs16902872 | NP_659437 | A | V | AV | benign            |
| rs16902880 | NP_001360 | M | V | MV | benign            |
| rs16902886 | NP_001360 | S | G | SG | benign            |
| rs16903367 | NP_009049 | D | E | DE | benign            |
| rs16903425 | NP_597677 | S | A | SA | benign            |
| rs16903474 | NP_009049 | A | T | AT | benign            |
| rs16903518 | NP_075561 | P | L | PL | probably damaging |
| rs16903574 | NP_061891 | F | L | FL | benign            |
| rs16903965 | NP_689616 | T | M | TM | possibly damaging |
| rs16903965 | NP_877950 | T | M | TM | possibly damaging |
| rs16905649 | NP_002834 | V | I | VI | benign            |
| rs16905753 | XP_372376 | P | L | PL | probably damaging |
| rs16905785 | XP_372370 | M | T | MT | benign            |
| rs16905921 | XP_497217 | G | A | GA | possibly damaging |
| rs16905996 | NP_659460 | K | T | KT | benign            |
| rs16906079 | NP_612566 | T | A | TA | benign            |
| rs16906079 | NP_612564 | T | A | TA | benign            |
| rs16906089 | NP_443723 | K | N | KN | benign            |
| rs16906628 | NP_004202 | G | R | GR | possibly damaging |
| rs16906862 | NP_003168 | R | H | RH | possibly damaging |
| rs16907865 | NP_002408 | N | S | NS | benign            |
| rs16907980 | NP_006682 | T | I | TI | possibly damaging |
| rs16909422 | XP_171528 | F | Y | FY | possibly damaging |
| rs16909440 | XP_061610 | N | S | NS | benign            |
| rs16909677 | NP_689635 | L | Q | LQ | benign            |
| rs16909677 | NP_818931 | L | Q | LQ | possibly damaging |
| rs16909747 | NP_060719 | R | S | RS | benign            |
| rs16909873 | NP_000255 | P | L | PL | possibly damaging |
| rs16910239 | NP_001726 | E | D | ED | benign            |
| rs16910245 | NP_001726 | V | A | VA | benign            |
| rs16910527 | NP_922939 | D | E | DE | benign            |
| rs16910527 | NP_922940 | D | E | DE | benign            |
| rs16910527 | NP_922941 | I | S | IS | benign            |
| rs16910527 | NP_072092 | I | S | IS | benign            |

|            |           |   |   |    |                   |
|------------|-----------|---|---|----|-------------------|
| rs16910527 | NP_922938 | I | S | IS | possibly damaging |
| rs16911075 | NP_003662 | I | T | IT | probably damaging |
| rs16911075 | NP_201588 | I | T | IT | probably damaging |
| rs16911075 | NP_201589 | I | T | IT | probably damaging |
| rs16911114 | NP_003662 | I | T | IT | possibly damaging |
| rs16911114 | NP_201588 | I | T | IT | possibly damaging |
| rs16911114 | NP_201589 | I | T | IT | possibly damaging |
| rs16911679 | NP_116212 | V | I | VI | benign            |
| rs16911681 | NP_116212 | R | Q | RQ | benign            |
| rs16912227 | NP_000175 | I | T | IT | possibly damaging |
| rs16912227 | NP_000550 | T | I | TI | possibly damaging |
| rs16912250 | NP_599028 | I | V | IV | benign            |
| rs16912250 | NP_439897 | I | V | IV | benign            |
| rs16912304 | XP_061890 | R | S | RS | benign            |
| rs16912304 | XP_495891 | S | R | SR | benign            |
| rs16912726 | NP_004477 | R | G | RG | probably damaging |
| rs16912727 | NP_065091 | N | S | NS | benign            |
| rs16912729 | XP_294590 | S | R | SR | possibly damaging |
| rs16912752 | NP_004477 | M | V | MV | possibly damaging |
| rs16913225 | XP_372347 | Q | R | QR | benign            |
| rs16913653 | NP_003631 | G | S | GS | possibly damaging |
| rs16913734 | NP_003789 | T | S | TS | benign            |
| rs16913755 | NP_060891 | Q | R | QR | possibly damaging |
| rs16913874 | NP_473373 | N | S | NS | benign            |
| rs16914094 | XP_372368 | F | L | FL | benign            |
| rs16914400 | XP_290482 | K | N | KN | benign            |
| rs16914400 | XP_495824 | N | K | NK | benign            |
| rs16914640 | NP_037401 | N | K | NK | benign            |
| rs16914749 | XP_084514 | D | V | DV | possibly damaging |
| rs16914898 | XP_208060 | F | L | FL | possibly damaging |
| rs16915026 | NP_085128 | M | I | MI | benign            |
| rs16915863 | XP_495919 | H | P | HP | probably damaging |
| rs16915907 | XP_495912 | N | D | ND | benign            |
| rs16916091 | XP_036708 | T | S | TS | benign            |
| rs16916632 | NP_061971 | R | Q | RQ | benign            |
| rs16917089 | NP_808219 | V | A | VA | benign            |
| rs16917397 | XP_495863 | S | R | SR | benign            |
| rs16917409 | XP_061864 | I | V | IV | benign            |
| rs16917454 | NP_149040 | A | V | AV | benign            |
| rs16917480 | XP_084514 | C | Y | CY | probably damaging |
| rs16917481 | XP_084514 | T | A | TA | benign            |
| rs16918105 | XP_061871 | N | S | NS | benign            |
| rs16918128 | NP_001846 | A | T | AT | benign            |
| rs16918393 | NP_722516 | I | V | IV | benign            |
| rs16918468 | XP_294590 | N | S | NS | benign            |
| rs16919049 | NP_997069 | L | F | LF | benign            |

|            |           |   |   |    |                   |
|------------|-----------|---|---|----|-------------------|
| rs16919359 | XP_055095 | A | V | AV | benign            |
| rs16919452 | NP_078997 | I | V | IV | benign            |
| rs16919579 | NP_054737 | R | W | RW | possibly damaging |
| rs16919654 | NP_690049 | P | L | PL | possibly damaging |
| rs16919654 | NP_690050 | P | L | PL | probably damaging |
| rs16919923 | NP_006321 | P | S | PS | benign            |
| rs16920463 | XP_088367 | Y | C | YC | benign            |
| rs16920614 | NP_006260 | Y | C | YC | probably damaging |
| rs16920621 | NP_006260 | V | L | VL | benign            |
| rs16921449 | NP_004161 | F | Y | FY | benign            |
| rs16921613 | NP_060455 | A | T | AT | benign            |
| rs16922259 | NP_079107 | V | I | VI | benign            |
| rs16922864 | NP_775104 | E | G | EG | possibly damaging |
| rs16923590 | NP_003571 | Y | C | YC | probably damaging |
| rs16923785 | NP_060863 | H | Q | HQ | probably damaging |
| rs16924002 | NP_068776 | D | E | DE | benign            |
| rs16924038 | NP_068776 | A | T | AT | benign            |
| rs16924241 | NP_254274 | I | M | IM | benign            |
| rs16924906 | NP_065875 | E | K | EK | benign            |
| rs16925541 | NP_085128 | N | S | NS | benign            |
| rs16925868 | NP_076411 | T | A | TA | benign            |
| rs16925882 | NP_689922 | P | R | PR | possibly damaging |
| rs16926210 | XP_034640 | Y | F | YF | possibly damaging |
| rs16926732 | XP_372369 | D | G | DG | benign            |
| rs16926948 | NP_937828 | G | E | GE | possibly damaging |
| rs16927037 | NP_067063 | G | V | GV | benign            |
| rs16927482 | NP_056245 | A | T | AT | benign            |
| rs16927649 | NP_872293 | R | Q | RQ | benign            |
| rs16927965 | NP_005824 | H | Y | HY | possibly damaging |
| rs16929093 | NP_000527 | E | G | EG | benign            |
| rs16929354 | NP_071407 | I | M | IM | benign            |
| rs16929374 | NP_000541 | R | H | RH | possibly damaging |
| rs16930134 | NP_003820 | T | A | TA | benign            |
| rs16930304 | NP_036259 | S | F | SF | benign            |
| rs16930426 | NP_002531 | T | S | TS | benign            |
| rs16930845 | NP_116198 | V | A | VA | benign            |
| rs16930872 | NP_004913 | L | P | LP | possibly damaging |
| rs16930872 | NP_940999 | L | P | LP | possibly damaging |
| rs16930888 | NP_775811 | A | V | AV | benign            |
| rs16930982 | XP_372356 | R | H | RH | benign            |
| rs16931179 | NP_054706 | A | V | AV | benign            |
| rs16931292 | XP_372357 | R | P | RP | possibly damaging |
| rs16931448 | XP_372083 | R | S | RS | benign            |
| rs16931549 | NP_036276 | A | V | AV | benign            |
| rs16931555 | NP_036276 | Q | H | QH | possibly damaging |
| rs16931745 | NP_005109 | F | L | FL | benign            |



|            |           |   |   |    |                   |
|------------|-----------|---|---|----|-------------------|
| rs16931996 | NP_057448 | R | G | RG | probably damaging |
| rs16932004 | NP_057448 | R | Q | RQ | benign            |
| rs16932374 | NP_000543 | M | I | MI | possibly damaging |
| rs16932503 | NP_703146 | T | K | TK | possibly damaging |
| rs16932768 | NP_001264 | I | V | IV | benign            |
| rs16932783 | XP_372447 | S | L | SL | possibly damaging |
| rs16932835 | NP_002225 | R | G | RG | probably damaging |
| rs16932912 | NP_066934 | V | I | VI | benign            |
| rs16932941 | NP_002066 | G | S | GS | possibly damaging |
| rs16933054 | NP_066280 | I | T | IT | possibly damaging |
| rs16933088 | NP_775789 | M | K | MK | benign            |
| rs16933182 | NP_079066 | H | R | HR | benign            |
| rs16933591 | NP_937831 | V | I | VI | benign            |
| rs16933591 | NP_937829 | V | I | VI | benign            |
| rs16933591 | NP_937830 | V | I | VI | benign            |
| rs16933591 | NP_054729 | V | I | VI | benign            |
| rs16933844 | NP_569073 | N | K | NK | benign            |
| rs16933844 | NP_067629 | N | K | NK | benign            |
| rs16934203 | NP_071935 | A | V | AV | benign            |
| rs16934950 | NP_954630 | E | K | EK | benign            |
| rs16934951 | NP_954630 | E | K | EK | benign            |
| rs16934999 | NP_473373 | F | L | FL | benign            |
| rs16935000 | NP_473372 | R | C | RC | possibly damaging |
| rs16935002 | NP_473373 | S | L | SL | possibly damaging |
| rs16935065 | NP_443190 | A | T | AT | benign            |
| rs16935246 | NP_954630 | K | R | KR | benign            |
| rs16935295 | NP_060919 | M | I | MI | possibly damaging |
| rs16935295 | NP_065918 | M | I | MI | probably damaging |
| rs16935326 | NP_062565 | A | V | AV | benign            |
| rs16935436 | NP_002292 | E | Q | EQ | benign            |
| rs16935436 | NP_059144 | E | Q | EQ | benign            |
| rs16935457 | NP_057609 | N | K | NK | benign            |
| rs16935693 | XP_497012 | V | M | VM | probably damaging |
| rs16937251 | NP_660093 | Q | H | QH | possibly damaging |
| rs16937251 | NP_892009 | Q | H | QH | possibly damaging |
| rs16937417 | NP_443723 | T | A | TA | benign            |
| rs16937432 | NP_443723 | R | C | RC | benign            |
| rs16937479 | NP_060729 | N | H | NH | benign            |
| rs16937932 | NP_982272 | R | W | RW | probably damaging |
| rs16937976 | NP_015628 | T | R | TR | benign            |
| rs16938289 | NP_067091 | M | V | MV | benign            |
| rs16938289 | NP_066546 | V | M | VM | benign            |
| rs16938293 | NP_067091 | N | H | NH | benign            |
| rs16938324 | NP_066546 | T | I | TI | benign            |
| rs16938368 | XP_171424 | R | Q | RQ | benign            |
| rs16938507 | NP_004761 | E | G | EG | benign            |

|            |           |   |   |    |                   |
|------------|-----------|---|---|----|-------------------|
| rs16938603 | NP_003111 | F | C | FC | probably damaging |
| rs16938828 | NP_065698 | D | H | DH | benign            |
| rs16938829 | NP_065698 | T | M | TM | benign            |
| rs16939380 | NP_078997 | V | G | VG | possibly damaging |
| rs16939713 | NP_002046 | D | N | DN | possibly damaging |
| rs16939743 | NP_787954 | I | T | IT | benign            |
| rs16939752 | NP_787954 | C | R | CR | possibly damaging |
| rs16939879 | NP_078998 | Q | R | QR | benign            |
| rs16939904 | NP_116052 | H | R | HR | benign            |
| rs16940050 | NP_000327 | G | V | GV | benign            |
| rs16940094 | NP_705831 | T | M | TM | benign            |
| rs16940488 | NP_803564 | N | T | NT | benign            |
| rs16940488 | NP_001045 | N | T | NT | benign            |
| rs16940600 | NP_057100 | A | V | AV | benign            |
| rs16940655 | NP_004373 | A | V | AV | benign            |
| rs16940680 | NP_115676 | E | K | EK | benign            |
| rs16940694 | NP_787078 | T | I | TI | benign            |
| rs16940732 | NP_036223 | K | M | KM | possibly damaging |
| rs16940949 | XP_370968 | R | H | RH | benign            |
| rs16941036 | NP_004692 | M | T | MT | probably damaging |
| rs16941623 | NP_660330 | W | R | WR | probably damaging |
| rs16941677 | NP_002467 | N | Y | NY | probably damaging |
| rs16941860 | NP_079229 | L | F | LF | benign            |
| rs16941888 | NP_071446 | H | Y | HY | benign            |
| rs16941904 | NP_789775 | R | W | RW | benign            |
| rs16941904 | NP_073750 | R | W | RW | benign            |
| rs16941907 | NP_789775 | Q | H | QH | benign            |
| rs16941907 | NP_073750 | Q | H | QH | benign            |
| rs16942044 | NP_000961 | K | E | KE | benign            |
| rs16942219 | XP_290809 | I | V | IV | benign            |
| rs16942374 | NP_006178 | R | H | RH | benign            |
| rs16942445 | NP_001288 | A | S | AS | benign            |
| rs16942601 | NP_116237 | S | W | SW | possibly damaging |
| rs16942615 | NP_055914 | S | P | SP | benign            |
| rs16942745 | NP_079235 | R | C | RC | possibly damaging |
| rs16942793 | XP_496272 | V | M | VM | benign            |
| rs16942794 | XP_496272 | Q | K | QK | benign            |
| rs16942798 | XP_496272 | V | F | VF | possibly damaging |
| rs16943025 | NP_076968 | N | D | ND | benign            |
| rs16943298 | NP_002461 | T | A | TA | benign            |
| rs16943373 | NP_002463 | A | E | AE | probably damaging |
| rs16943379 | NP_057280 | R | G | RG | probably damaging |
| rs16943441 | NP_060003 | A | D | AD | probably damaging |
| rs16943490 | NP_006092 | S | A | SA | benign            |
| rs16943596 | NP_001141 | S | N | SN | benign            |
| rs16943977 | NP_114437 | A | T | AT | benign            |

|            |           |   |   |    |                   |
|------------|-----------|---|---|----|-------------------|
| rs16943991 | NP_071353 | S | L | SL | benign            |
| rs16944002 | NP_742095 | V | G | VG | possibly damaging |
| rs16944002 | NP_742094 | V | G | VG | possibly damaging |
| rs16944002 | NP_742093 | V | G | VG | possibly damaging |
| rs16944002 | NP_473361 | V | G | VG | possibly damaging |
| rs16944065 | NP_064595 | S | N | SN | benign            |
| rs16944065 | NP_945119 | S | N | SN | benign            |
| rs16944113 | NP_057729 | D | G | DG | possibly damaging |
| rs16944136 | NP_115971 | T | I | TI | benign            |
| rs16944142 | NP_115971 | G | R | GR | probably damaging |
| rs16944148 | NP_115971 | A | G | AG | benign            |
| rs16944397 | NP_003794 | M | T | MT | benign            |
| rs16944971 | NP_002560 | A | V | AV | benign            |
| rs16945138 | NP_001363 | R | W | RW | probably damaging |
| rs16945431 | NP_001363 | R | Q | RQ | possibly damaging |
| rs16945431 | NP_004653 | R | Q | RQ | possibly damaging |
| rs16945474 | NP_000284 | Y | C | YC | probably damaging |
| rs16945787 | NP_150229 | E | A | EA | benign            |
| rs16945816 | NP_660188 | N | Y | NY | possibly damaging |
| rs16945816 | NP_660189 | N | Y | NY | possibly damaging |
| rs16945816 | NP_660190 | N | Y | NY | possibly damaging |
| rs16945816 | NP_660191 | N | Y | NY | possibly damaging |
| rs16945816 | NP_150229 | N | Y | NY | possibly damaging |
| rs16945874 | NP_660188 | A | E | AE | benign            |
| rs16945874 | NP_660189 | A | E | AE | benign            |
| rs16945874 | NP_660190 | A | E | AE | benign            |
| rs16945874 | NP_660191 | A | E | AE | benign            |
| rs16945874 | NP_150229 | A | E | AE | benign            |
| rs16945901 | NP_660188 | I | L | IL | benign            |
| rs16945901 | NP_660189 | I | L | IL | benign            |
| rs16945901 | NP_660190 | I | L | IL | benign            |
| rs16945901 | NP_660191 | I | L | IL | benign            |
| rs16945901 | NP_150229 | I | L | IL | benign            |
| rs16946335 | NP_689811 | E | K | EK | benign            |
| rs16946429 | XP_496170 | E | G | EG | possibly damaging |
| rs16947226 | NP_072051 | F | L | FL | benign            |
| rs16947229 | NP_072051 | G | E | GE | possibly damaging |
| rs16947300 | NP_003913 | I | V | IV | benign            |
| rs16947350 | NP_653203 | R | Q | RQ | benign            |
| rs16947353 | NP_003913 | T | A | TA | benign            |
| rs16947363 | NP_003913 | S | A | SA | benign            |
| rs16948530 | NP_006651 | A | T | AT | benign            |
| rs16948568 | NP_683685 | V | I | VI | benign            |
| rs16948568 | NP_660298 | V | I | VI | benign            |
| rs16948646 | NP_002195 | A | T | AT | benign            |
| rs16948646 | NP_005492 | A | T | AT | benign            |

|            |           |   |   |    |                   |
|------------|-----------|---|---|----|-------------------|
| rs16948978 | NP_001294 | T | I | TI | benign            |
| rs16948986 | NP_001294 | Y | C | YC | benign            |
| rs16949292 | NP_848594 | V | I | VI | benign            |
| rs16950136 | XP_371107 | E | G | EG | probably damaging |
| rs16950277 | NP_055683 | E | D | ED | benign            |
| rs16950706 | NP_075046 | G | R | GR | benign            |
| rs16950860 | NP_002553 | R | C | RC | possibly damaging |
| rs16950981 | NP_005550 | D | V | DV | possibly damaging |
| rs16951079 | NP_005550 | V | I | VI | benign            |
| rs16951186 | XP_049037 | V | M | VM | benign            |
| rs16951438 | XP_371116 | C | G | CG | probably damaging |
| rs16951667 | XP_497568 | T | I | TI | possibly damaging |
| rs16951861 | NP_001374 | K | R | KR | benign            |
| rs16952606 | NP_003543 | I | T | IT | possibly damaging |
| rs16952624 | XP_051200 | A | V | AV | benign            |
| rs16952684 | NP_663633 | H | Q | HQ | possibly damaging |
| rs16952692 | NP_002387 | P | L | PL | probably damaging |
| rs16952828 | NP_002541 | S | G | SG | benign            |
| rs16953073 | NP_056078 | N | D | ND | possibly damaging |
| rs16953240 | XP_085236 | N | K | NK | benign            |
| rs16953308 | NP_077312 | Q | H | QH | benign            |
| rs16953687 | NP_055928 | I | V | IV | benign            |
| rs16954056 | NP_060759 | L | I | LI | benign            |
| rs16954127 | NP_851421 | V | I | VI | benign            |
| rs16954127 | NP_851422 | V | I | VI | benign            |
| rs16954127 | NP_055818 | V | I | VI | benign            |
| rs16954127 | XP_496064 | V | I | VI | benign            |
| rs16954141 | NP_851421 | K | N | KN | benign            |
| rs16954141 | NP_851422 | K | N | KN | benign            |
| rs16954141 | NP_055818 | K | N | KN | benign            |
| rs16954141 | XP_496064 | K | N | KN | benign            |
| rs16954144 | NP_851421 | R | Q | RQ | benign            |
| rs16954144 | NP_851422 | R | Q | RQ | benign            |
| rs16954144 | NP_055818 | R | Q | RQ | benign            |
| rs16954144 | XP_496064 | R | Q | RQ | benign            |
| rs16954210 | XP_372563 | D | N | DN | benign            |
| rs16954210 | XP_372565 | D | N | DN | benign            |
| rs16954213 | XP_372563 | Q | E | QE | benign            |
| rs16954213 | XP_372565 | Q | E | QE | benign            |
| rs16954522 | XP_375375 | T | I | TI | possibly damaging |
| rs16954775 | NP_877417 | A | V | AV | benign            |
| rs16954781 | NP_076944 | M | V | MV | possibly damaging |
| rs16954794 | NP_877417 | G | V | GV | possibly damaging |
| rs16955011 | NP_849192 | V | M | VM | benign            |
| rs16955280 | NP_004521 | V | L | VL | benign            |
| rs16955377 | NP_005477 | R | S | RS | possibly damaging |

|            |           |   |   |    |                   |
|------------|-----------|---|---|----|-------------------|
| rs16955812 | NP_659461 | G | R | GR | probably damaging |
| rs16955851 | NP_055151 | Y | F | YF | benign            |
| rs16955859 | NP_055151 | V | A | VA | benign            |
| rs16955870 | NP_061886 | S | C | SC | benign            |
| rs16955934 | NP_056111 | K | E | KE | benign            |
| rs16955985 | XP_375397 | H | Q | HQ | benign            |
| rs16956063 | XP_497550 | V | A | VA | benign            |
| rs16956174 | NP_660151 | K | E | KE | benign            |
| rs16956264 | NP_694962 | Y | C | YC | benign            |
| rs16956337 | XP_370848 | W | R | WR | probably damaging |
| rs16956367 | NP_008832 | H | Y | HY | possibly damaging |
| rs16956375 | NP_008832 | P | R | PR | probably damaging |
| rs16956478 | NP_006335 | R | K | RK | benign            |
| rs16956478 | NP_878910 | R | K | RK | benign            |
| rs16956504 | NP_001786 | I | T | IT | benign            |
| rs16956746 | NP_851787 | S | T | ST | benign            |
| rs16956746 | NP_851788 | S | T | ST | benign            |
| rs16956746 | NP_851789 | S | T | ST | benign            |
| rs16956746 | NP_851800 | S | T | ST | benign            |
| rs16956746 | NP_851786 | S | T | ST | benign            |
| rs16956808 | NP_004861 | G | S | GS | benign            |
| rs16956904 | XP_294751 | M | L | ML | benign            |
| rs16957055 | XP_031744 | A | V | AV | benign            |
| rs16957061 | XP_031744 | Y | C | YC | probably damaging |
| rs16957069 | NP_064709 | A | E | AE | benign            |
| rs16957212 | NP_848611 | S | G | SG | benign            |
| rs16957289 | XP_085367 | E | K | EK | benign            |
| rs16957356 | NP_000273 | S | L | SL | possibly damaging |
| rs16957415 | NP_060766 | S | G | SG | benign            |
| rs16957538 | NP_114091 | A | V | AV | benign            |
| rs16957546 | NP_653275 | H | R | HR | possibly damaging |
| rs16957552 | NP_055382 | H | R | HR | possibly damaging |
| rs16957557 | NP_653275 | A | T | AT | benign            |
| rs16957558 | NP_055382 | R | L | RL | possibly damaging |
| rs16957670 | NP_071752 | V | I | VI | benign            |
| rs16957938 | NP_067639 | V | I | VI | benign            |
| rs16958096 | NP_775800 | C | F | CF | probably damaging |
| rs16958180 | XP_171766 | E | K | EK | possibly damaging |
| rs16958186 | XP_171766 | P | L | PL | probably damaging |
| rs16958445 | NP_699187 | R | Q | RQ | benign            |
| rs16958654 | NP_054872 | H | R | HR | benign            |
| rs16958679 | NP_005673 | P | L | PL | possibly damaging |
| rs16958679 | NP_958933 | P | L | PL | probably damaging |
| rs16958679 | NP_958932 | P | L | PL | probably damaging |
| rs16958784 | XP_371115 | V | I | VI | benign            |
| rs16958918 | NP_004237 | R | H | RH | benign            |

|            |           |   |   |    |                   |
|------------|-----------|---|---|----|-------------------|
| rs16958940 | NP_765975 | P | T | PT | possibly damaging |
| rs16958940 | NP_765977 | P | T | PT | possibly damaging |
| rs16958940 | NP_765978 | P | T | PT | possibly damaging |
| rs16958940 | NP_006153 | P | T | PT | possibly damaging |
| rs16959457 | NP_001288 | P | L | PL | possibly damaging |
| rs16959641 | NP_078874 | Q | E | QE | benign            |
| rs16960074 | NP_065909 | S | T | ST | benign            |
| rs16960074 | NP_705871 | S | T | ST | benign            |
| rs16960074 | NP_705870 | S | T | ST | benign            |
| rs16960074 | NP_705869 | S | T | ST | benign            |
| rs16960383 | XP_116936 | N | S | NS | benign            |
| rs16960959 | NP_057323 | A | T | AT | benign            |
| rs16961557 | XP_034904 | V | A | VA | benign            |
| rs16961560 | XP_034904 | L | V | LV | benign            |
| rs16961655 | NP_001933 | T | S | TS | benign            |
| rs16961689 | NP_001933 | Y | S | YS | benign            |
| rs16961692 | NP_001933 | L | Q | LQ | probably damaging |
| rs16961728 | NP_976224 | Q | H | QH | benign            |
| rs16961975 | NP_001935 | V | M | VM | benign            |
| rs16962530 | NP_055754 | Q | E | QE | benign            |
| rs16962974 | NP_073588 | A | V | AV | benign            |
| rs16962976 | XP_086494 | R | H | RH | possibly damaging |
| rs16962980 | XP_086494 | Y | H | YH | benign            |
| rs16962987 | XP_370863 | V | G | VG | possibly damaging |
| rs16962989 | XP_370863 | N | K | NK | benign            |
| rs16963151 | XP_370863 | N | S | NS | benign            |
| rs16963331 | NP_006315 | A | T | AT | benign            |
| rs16963486 | NP_002103 | F | L | FL | possibly damaging |
| rs16964044 | NP_060676 | E | G | EG | possibly damaging |
| rs16964176 | XP_371023 | A | T | AT | benign            |
| rs16964180 | XP_497522 | D | N | DN | benign            |
| rs16964184 | XP_371023 | T | P | TP | probably damaging |
| rs16964363 | NP_003975 | M | L | ML | probably damaging |
| rs16964462 | XP_371036 | R | G | RG | probably damaging |
| rs16964472 | XP_371036 | H | Q | HQ | possibly damaging |
| rs16964887 | XP_290811 | M | R | MR | probably damaging |
| rs16964944 | NP_000250 | M | T | MT | benign            |
| rs16965131 | NP_004765 | P | T | PT | possibly damaging |
| rs16965388 | NP_061000 | R | C | RC | possibly damaging |
| rs16965839 | NP_150254 | T | P | TP | probably damaging |
| rs16965839 | NP_000968 | T | P | TP | probably damaging |
| rs16966138 | NP_061889 | R | C | RC | probably damaging |
| rs16966705 | NP_066293 | I | T | IT | benign            |
| rs16966742 | NP_003762 | Q | R | QR | benign            |
| rs16966743 | NP_003762 | A | V | AV | possibly damaging |
| rs16966811 | NP_003761 | A | V | AV | benign            |

|            |           |   |   |    |                   |
|------------|-----------|---|---|----|-------------------|
| rs16966929 | NP_002269 | T | M | TM | possibly damaging |
| rs16966957 | NP_775745 | H | N | HN | benign            |
| rs16967042 | NP_060898 | K | R | KR | benign            |
| rs16967474 | NP_060725 | H | R | HR | probably damaging |
| rs16967494 | NP_074035 | A | T | AT | benign            |
| rs16967494 | NP_002465 | A | T | AT | benign            |
| rs16967510 | NP_074035 | V | A | VA | benign            |
| rs16967510 | NP_002465 | V | A | VA | benign            |
| rs16967805 | NP_060495 | L | S | LS | benign            |
| rs16967845 | NP_776246 | C | Y | CY | probably damaging |
| rs16967895 | NP_899233 | D | G | DG | probably damaging |
| rs16968052 | NP_003725 | R | Q | RQ | benign            |
| rs16968365 | NP_009223 | K | Q | KQ | benign            |
| rs16968369 | NP_009223 | N | H | NH | benign            |
| rs16968372 | NP_009223 | I | L | IL | benign            |
| rs16968733 | NP_003603 | S | T | ST | benign            |
| rs16968862 | XP_496218 | S | L | SL | benign            |
| rs16969386 | NP_689810 | G | A | GA | benign            |
| rs16969673 | NP_689810 | E | G | EG | possibly damaging |
| rs16969925 | NP_001028 | R | H | RH | benign            |
| rs16969925 | NP_950238 | R | H | RH | benign            |
| rs16969968 | NP_000736 | D | N | DN | benign            |
| rs16970281 | XP_058743 | S | L | SL | benign            |
| rs16970453 | NP_443188 | I | T | IT | possibly damaging |
| rs16970497 | NP_116024 | S | T | ST | benign            |
| rs16970504 | NP_116024 | G | D | GD | benign            |
| rs16970511 | NP_443188 | I | M | IM | benign            |
| rs16970659 | NP_775259 | V | I | VI | benign            |
| rs16970806 | XP_371039 | V | L | VL | benign            |
| rs16970832 | NP_060009 | V | I | VI | benign            |
| rs16970857 | NP_060818 | F | L | FL | benign            |
| rs16970874 | NP_733468 | T | A | TA | benign            |
| rs16970874 | NP_653091 | T | A | TA | benign            |
| rs16970911 | NP_733468 | T | A | TA | benign            |
| rs16970911 | NP_653091 | T | A | TA | benign            |
| rs16971436 | NP_008816 | T | P | TP | benign            |
| rs16971526 | NP_775899 | I | V | IV | benign            |
| rs16971625 | NP_004040 | C | Y | CY | benign            |
| rs16971802 | NP_116738 | K | E | KE | benign            |
| rs16971802 | NP_116739 | K | E | KE | benign            |
| rs16971886 | XP_058997 | R | H | RH | benign            |
| rs16972020 | NP_689492 | I | V | IV | benign            |
| rs16972020 | NP_954577 | V | I | VI | benign            |
| rs16972129 | NP_055526 | R | S | RS | benign            |
| rs16972193 | NP_057726 | R | W | RW | probably damaging |
| rs16972517 | XP_370944 | Q | P | QP | benign            |

|            |           |   |   |    |                   |
|------------|-----------|---|---|----|-------------------|
| rs16972583 | NP_061159 | P | A | PA | possibly damaging |
| rs16972799 | NP_005021 | N | D | ND | benign            |
| rs16973015 | NP_937784 | I | V | IV | benign            |
| rs16973021 | XP_375313 | W | R | WR | probably damaging |
| rs16973023 | XP_375313 | V | A | VA | benign            |
| rs16973024 | XP_375313 | K | E | KE | benign            |
| rs16973313 | XP_028522 | M | T | MT | probably damaging |
| rs16973344 | NP_000344 | N | D | ND | benign            |
| rs16973407 | NP_073746 | I | V | IV | benign            |
| rs16973424 | NP_009099 | C | G | CG | probably damaging |
| rs16973446 | NP_009099 | T | A | TA | benign            |
| rs16973457 | XP_208809 | P | L | PL | possibly damaging |
| rs16973716 | NP_112583 | N | K | NK | benign            |
| rs16973734 | NP_775880 | C | R | CR | probably damaging |
| rs16973749 | NP_003881 | M | V | MV | benign            |
| rs16973796 | NP_116015 | D | H | DH | possibly damaging |
| rs16973806 | XP_370865 | L | V | LV | benign            |
| rs16973859 | XP_375376 | L | P | LP | possibly damaging |
| rs16973890 | NP_057620 | K | E | KE | benign            |
| rs16973893 | NP_057620 | K | M | KM | possibly damaging |
| rs16974462 | NP_378662 | P | T | PT | possibly damaging |
| rs16974462 | NP_378666 | P | T | PT | probably damaging |
| rs16974569 | NP_065829 | T | M | TM | possibly damaging |
| rs16974765 | NP_003817 | P | S | PS | probably damaging |
| rs16975065 | NP_085125 | T | P | TP | benign            |
| rs16975383 | XP_497555 | M | T | MT | probably damaging |
| rs16975478 | NP_008821 | Y | H | YH | possibly damaging |
| rs16975548 | NP_004354 | E | K | EK | benign            |
| rs16975588 | NP_002474 | G | V | GV | benign            |
| rs16975748 | NP_005348 | S | T | ST | benign            |
| rs16975750 | NP_005348 | Y | H | YH | benign            |
| rs16976120 | XP_496315 | T | M | TM | benign            |
| rs16976140 | NP_002771 | K | E | KE | benign            |
| rs16976174 | NP_066296 | N | T | NT | benign            |
| rs16976176 | NP_066296 | Q | K | QK | benign            |
| rs16976185 | NP_008836 | I | V | IV | benign            |
| rs16976185 | NP_066296 | V | I | VI | benign            |
| rs16976190 | NP_112536 | V | L | VL | benign            |
| rs16976205 | NP_112536 | V | A | VA | benign            |
| rs16976208 | NP_112536 | N | K | NK | benign            |
| rs16976214 | NP_002775 | D | Y | DY | benign            |
| rs16976214 | NP_112536 | Y | D | YD | benign            |
| rs16976234 | NP_008836 | R | K | RK | benign            |
| rs16976235 | NP_008836 | T | P | TP | benign            |
| rs16976238 | NP_008836 | E | Q | EQ | benign            |
| rs16976238 | NP_112536 | Q | E | QE | benign            |



|            |           |   |   |    |                   |
|------------|-----------|---|---|----|-------------------|
| rs16976354 | NP_570722 | N | K | NK | benign            |
| rs16976407 | NP_112536 | F | L | FL | benign            |
| rs16976416 | NP_112536 | Q | L | QL | benign            |
| rs16976431 | NP_112536 | T | A | TA | benign            |
| rs16976439 | NP_112536 | R | W | RW | benign            |
| rs16976466 | XP_370866 | T | A | TA | benign            |
| rs16976608 | NP_002650 | D | A | DA | benign            |
| rs16976751 | NP_073752 | G | V | GV | benign            |
| rs16976814 | NP_075563 | M | L | ML | possibly damaging |
| rs16976814 | NP_613074 | M | L | ML | possibly damaging |
| rs16976937 | NP_037491 | V | M | VM | benign            |
| rs16976939 | NP_037491 | R | C | RC | probably damaging |
| rs16976942 | NP_037491 | P | A | PA | probably damaging |
| rs16976948 | NP_055029 | A | T | AT | benign            |
| rs16976970 | XP_044632 | R | Q | RQ | benign            |
| rs16977032 | NP_001030 | E | K | EK | benign            |
| rs16977447 | NP_065834 | S | N | SN | benign            |
| rs16977594 | NP_116255 | M | V | MV | possibly damaging |
| rs16977629 | NP_689664 | V | A | VA | benign            |
| rs16977686 | NP_653166 | S | G | SG | benign            |
| rs16978523 | NP_004037 | A | S | AS | benign            |
| rs16978657 | NP_037493 | I | L | IL | benign            |
| rs16978705 | NP_037530 | H | L | HL | benign            |
| rs16978712 | NP_037530 | N | K | NK | benign            |
| rs16978715 | NP_037530 | N | D | ND | benign            |
| rs16978716 | NP_037530 | K | R | KR | benign            |
| rs16978718 | NP_037530 | F | L | FL | possibly damaging |
| rs16978738 | NP_037494 | T | S | TS | benign            |
| rs16978744 | NP_001366 | H | R | HR | probably damaging |
| rs16978899 | NP_861421 | S | P | SP | possibly damaging |
| rs16978965 | NP_037512 | G | E | GE | benign            |
| rs16978975 | NP_000059 | R | C | RC | benign            |
| rs16979010 | NP_056322 | E | K | EK | benign            |
| rs16979033 | NP_056322 | D | N | DN | possibly damaging |
| rs16979312 | NP_996772 | S | N | SN | benign            |
| rs16979312 | NP_996774 | S | N | SN | benign            |
| rs16979312 | NP_996773 | S | N | SN | benign            |
| rs16979521 | NP_859016 | T | P | TP | probably damaging |
| rs16979841 | NP_003591 | I | V | IV | benign            |
| rs16979841 | NP_940835 | I | V | IV | benign            |
| rs16979841 | NP_940836 | I | V | IV | benign            |
| rs16979841 | NP_940837 | I | V | IV | benign            |
| rs16979841 | NP_940838 | I | V | IV | benign            |
| rs16979841 | NP_940839 | I | V | IV | benign            |
| rs16979907 | NP_003442 | D | G | DG | benign            |
| rs16979912 | NP_945182 | S | P | SP | possibly damaging |

|            |           |   |   |    |                   |
|------------|-----------|---|---|----|-------------------|
| rs16979967 | XP_372712 | M | T | MT | benign            |
| rs16980312 | XP_065050 | I | T | IT | benign            |
| rs16980489 | NP_004645 | P | S | PS | possibly damaging |
| rs16980531 | NP_775754 | S | C | SC | benign            |
| rs16980758 | NP_066925 | Q | H | QH | benign            |
| rs16980822 | XP_065153 | H | R | HR | possibly damaging |
| rs16980929 | NP_000283 | G | R | GR | probably damaging |
| rs16980994 | XP_065153 | N | K | NK | benign            |
| rs16981016 | NP_056182 | I | V | IV | benign            |
| rs16981187 | NP_110403 | D | H | DH | possibly damaging |
| rs16981648 | XP_292824 | K | Q | KQ | benign            |
| rs16981827 | XP_496488 | S | N | SN | benign            |
| rs16981869 | NP_872431 | N | S | NS | benign            |
| rs16981934 | NP_055221 | W | R | WR | possibly damaging |
| rs16981956 | NP_705836 | V | A | VA | benign            |
| rs16981999 | NP_699191 | R | C | RC | possibly damaging |
| rs16982020 | NP_060299 | R | S | RS | benign            |
| rs16982149 | NP_814444 | L | S | LS | benign            |
| rs16982149 | NP_004596 | L | S | LS | possibly damaging |
| rs16982158 | NP_814444 | D | N | DN | benign            |
| rs16982158 | NP_004596 | D | N | DN | benign            |
| rs16982169 | NP_814444 | R | H | RH | benign            |
| rs16982169 | NP_004596 | R | H | RH | possibly damaging |
| rs16982285 | XP_371146 | A | V | AV | benign            |
| rs16982388 | NP_057452 | T | P | TP | benign            |
| rs16982614 | NP_690870 | D | E | DE | benign            |
| rs16982871 | NP_001661 | R | Q | RQ | benign            |
| rs16982928 | NP_003401 | A | T | AT | benign            |
| rs16983230 | XP_497639 | K | T | KT | benign            |
| rs16983231 | XP_497639 | T | A | TA | benign            |
| rs16983243 | NP_079116 | I | R | IR | benign            |
| rs16983281 | NP_005666 | A | V | AV | benign            |
| rs16983353 | NP_940882 | R | K | RK | benign            |
| rs16983412 | XP_209155 | V | L | VL | benign            |
| rs16983509 | XP_497781 | T | M | TM | benign            |
| rs16983580 | NP_056380 | A | V | AV | benign            |
| rs16983693 | XP_375936 | H | Q | HQ | possibly damaging |
| rs16983815 | XP_496320 | H | Y | HY | probably damaging |
| rs16983886 | NP_057518 | K | N | KN | benign            |
| rs16983886 | NP_116575 | K | N | KN | benign            |
| rs16983889 | NP_057518 | M | I | MI | benign            |
| rs16983889 | NP_116575 | M | I | MI | benign            |
| rs16984014 | XP_497139 | R | C | RC | possibly damaging |
| rs16984134 | NP_071336 | T | P | TP | benign            |
| rs16984466 | NP_060825 | H | P | HP | benign            |
| rs16984945 | NP_848551 | R | H | RH | benign            |

|            |           |   |   |    |                   |
|------------|-----------|---|---|----|-------------------|
| rs16985357 | NP_612140 | Y | F | YF | benign            |
| rs16985442 | NP_065759 | P | A | PA | benign            |
| rs16985478 | NP_006660 | K | E | KE | benign            |
| rs16985478 | NP_006855 | K | E | KE | benign            |
| rs16985486 | NP_006855 | V | A | VA | benign            |
| rs16985501 | NP_006831 | H | N | HN | benign            |
| rs16985517 | NP_006838 | R | Q | RQ | benign            |
| rs16985518 | NP_006855 | D | N | DN | benign            |
| rs16985555 | NP_006855 | E | Q | EQ | benign            |
| rs16985580 | NP_006857 | V | G | VG | probably damaging |
| rs16985644 | NP_001890 | D | N | DN | benign            |
| rs16985729 | NP_001889 | R | M | RM | probably damaging |
| rs16985747 | NP_006857 | G | A | GA | benign            |
| rs16985750 | NP_001513 | Y | C | YC | probably damaging |
| rs16985780 | NP_001640 | D | E | DE | benign            |
| rs16985830 | NP_006855 | R | Q | RQ | benign            |
| rs16985906 | NP_703144 | H | Y | HY | probably damaging |
| rs16985907 | NP_703144 | A | P | AP | benign            |
| rs16985931 | NP_036446 | N | D | ND | benign            |
| rs16985931 | NP_839942 | N | D | ND | benign            |
| rs16985935 | NP_037421 | L | P | LP | benign            |
| rs16986036 | NP_036446 | P | T | PT | benign            |
| rs16986036 | NP_839942 | P | T | PT | benign            |
| rs16986050 | NP_579803 | S | G | SG | benign            |
| rs16986050 | NP_579805 | S | G | SG | benign            |
| rs16986050 | NP_579807 | S | G | SG | benign            |
| rs16986050 | NP_579811 | S | G | SG | benign            |
| rs16986050 | NP_579812 | S | G | SG | benign            |
| rs16986050 | NP_579806 | S | G | SG | benign            |
| rs16986050 | NP_001991 | S | G | SG | possibly damaging |
| rs16986123 | NP_055385 | S | G | SG | benign            |
| rs16986337 | NP_110434 | R | W | RW | possibly damaging |
| rs16986465 | NP_038347 | V | A | VA | possibly damaging |
| rs16986560 | NP_000487 | A | S | AS | benign            |
| rs16986753 | NP_853652 | R | C | RC | probably damaging |
| rs16987048 | XP_292723 | M | L | ML | benign            |
| rs16987136 | NP_114434 | E | G | EG | possibly damaging |
| rs16987136 | NP_700358 | E | G | EG | possibly damaging |
| rs16987188 | XP_028810 | A | V | AV | benign            |
| rs16987290 | NP_060151 | F | L | FL | benign            |
| rs16987303 | NP_065864 | S | C | SC | benign            |
| rs16987592 | NP_542789 | S | C | SC | possibly damaging |
| rs16987625 | NP_006595 | M | T | MT | possibly damaging |
| rs16987627 | NP_066306 | W | R | WR | possibly damaging |
| rs16987632 | NP_006596 | S | T | ST | benign            |
| rs16987768 | XP_371423 | W | C | WC | probably damaging |

|            |           |   |   |    |                   |
|------------|-----------|---|---|----|-------------------|
| rs16987824 | NP_998763 | L | H | LH | possibly damaging |
| rs16987932 | NP_003244 | H | Q | HQ | possibly damaging |
| rs16987972 | NP_056470 | R | G | RG | possibly damaging |
| rs16988219 | NP_543032 | A | T | AT | benign            |
| rs16988463 | XP_045421 | T | P | TP | benign            |
| rs16988799 | NP_653088 | V | I | VI | benign            |
| rs16988799 | NP_009127 | V | I | VI | benign            |
| rs16988873 | NP_075556 | R | W | RW | possibly damaging |
| rs16988910 | NP_055256 | K | Q | KQ | benign            |
| rs16989015 | NP_542778 | L | F | LF | benign            |
| rs16989105 | NP_004420 | V | A | VA | benign            |
| rs16989282 | NP_006855 | Y | F | YF | benign            |
| rs16989284 | NP_006855 | P | R | PR | benign            |
| rs16989291 | XP_038520 | W | R | WR | probably damaging |
| rs16989319 | NP_114100 | Q | H | QH | benign            |
| rs16989394 | NP_005865 | D | E | DE | benign            |
| rs16989521 | NP_653260 | R | H | RH | possibly damaging |
| rs16989528 | XP_376007 | A | V | AV | benign            |
| rs16989535 | XP_376007 | S | F | SF | benign            |
| rs16989698 | XP_038520 | R | H | RH | benign            |
| rs16990018 | NP_898902 | N | S | NS | benign            |
| rs16990065 | NP_055042 | T | M | TM | possibly damaging |
| rs16990169 | NP_004002 | R | C | RC | benign            |
| rs16990169 | NP_004003 | R | C | RC | benign            |
| rs16990169 | NP_000100 | R | C | RC | possibly damaging |
| rs16990169 | NP_003997 | R | C | RC | possibly damaging |
| rs16990169 | NP_003998 | R | C | RC | possibly damaging |
| rs16990169 | NP_004000 | R | C | RC | possibly damaging |
| rs16990169 | NP_004001 | R | C | RC | possibly damaging |
| rs16990264 | NP_000100 | N | K | NK | possibly damaging |
| rs16990264 | NP_003997 | N | K | NK | possibly damaging |
| rs16990264 | NP_003998 | N | K | NK | possibly damaging |
| rs16990264 | NP_004000 | N | K | NK | possibly damaging |
| rs16990264 | NP_004002 | N | K | NK | possibly damaging |
| rs16990264 | NP_004003 | N | K | NK | possibly damaging |
| rs16990264 | NP_004001 | N | K | NK | possibly damaging |
| rs16990468 | XP_497792 | N | S | NS | benign            |
| rs16990631 | XP_372869 | A | E | AE | benign            |
| rs16990731 | XP_372227 | R | C | RC | benign            |
| rs16990757 | NP_808211 | E | K | EK | benign            |
| rs16990757 | NP_803545 | E | K | EK | benign            |
| rs16990961 | NP_071378 | Y | H | YH | benign            |
| rs16990981 | NP_073622 | V | A | VA | benign            |
| rs16990981 | NP_942153 | V | A | VA | benign            |
| rs16991108 | NP_062539 | S | G | SG | benign            |
| rs16991591 | NP_877954 | N | S | NS | benign            |

|            |           |   |   |    |                   |
|------------|-----------|---|---|----|-------------------|
| rs16991591 | NP_115874 | N | S | NS | benign            |
| rs16991615 | NP_877954 | E | K | EK | benign            |
| rs16991615 | NP_115874 | E | K | EK | benign            |
| rs16991638 | NP_877954 | N | S | NS | benign            |
| rs16991638 | NP_115874 | N | S | NS | benign            |
| rs16991652 | NP_751951 | Q | E | QE | benign            |
| rs16991654 | NP_751951 | F | L | FL | benign            |
| rs16991656 | NP_751951 | A | V | AV | benign            |
| rs16991866 | NP_060141 | I | T | IT | benign            |
| rs16992061 | XP_208438 | H | D | HD | benign            |
| rs16992068 | XP_208438 | E | A | EA | benign            |
| rs16992072 | XP_208438 | H | N | HN | benign            |
| rs16992078 | XP_208438 | T | S | TS | benign            |
| rs16992083 | XP_208438 | P | S | PS | benign            |
| rs16992084 | XP_208438 | G | S | GS | benign            |
| rs16992131 | NP_733778 | E | K | EK | benign            |
| rs16992131 | NP_055261 | E | K | EK | benign            |
| rs16992427 | XP_372233 | V | G | VG | probably damaging |
| rs16992915 | NP_851851 | Y | C | YC | probably damaging |
| rs16993172 | NP_000141 | Q | K | QK | benign            |
| rs16993216 | NP_002025 | R | Q | RQ | benign            |
| rs16993928 | NP_683515 | S | A | SA | benign            |
| rs16993929 | NP_001227 | P | S | PS | probably damaging |
| rs16993997 | NP_065871 | V | I | VI | benign            |
| rs16994063 | NP_005432 | K | Q | KQ | benign            |
| rs16994115 | NP_006598 | P | R | PR | probably damaging |
| rs16994414 | XP_497170 | D | Y | DY | probably damaging |
| rs16994559 | NP_620168 | N | H | NH | benign            |
| rs16994563 | NP_620168 | V | I | VI | benign            |
| rs16994704 | NP_057514 | Y | C | YC | probably damaging |
| rs16994704 | NP_710148 | Y | C | YC | probably damaging |
| rs16994704 | NP_710149 | Y | C | YC | probably damaging |
| rs16995138 | NP_057510 | A | T | AT | benign            |
| rs16995209 | NP_079408 | G | S | GS | possibly damaging |
| rs16995229 | NP_653259 | I | F | IF | possibly damaging |
| rs16995304 | NP_002818 | G | S | GS | benign            |
| rs16995309 | NP_002818 | P | L | PL | possibly damaging |
| rs16995615 | NP_073603 | I | V | IV | benign            |
| rs16995685 | NP_620713 | R | S | RS | benign            |
| rs16995781 | NP_061943 | R | W | RW | probably damaging |
| rs16995792 | NP_005333 | T | A | TA | benign            |
| rs16996343 | NP_066387 | Q | H | QH | probably damaging |
| rs16996476 | XP_292832 | S | L | SL | benign            |
| rs16996512 | NP_005358 | E | D | ED | benign            |
| rs16996517 | NP_060667 | F | Y | FY | benign            |
| rs16996517 | NP_071371 | F | Y | FY | benign            |

|            |           |   |   |    |                   |
|------------|-----------|---|---|----|-------------------|
| rs16996517 | NP_955458 | F | Y | FY | benign            |
| rs16996593 | NP_000662 | D | E | DE | benign            |
| rs16996616 | NP_003652 | D | N | DN | benign            |
| rs16996616 | NP_663318 | D | N | DN | benign            |
| rs16996616 | NP_663319 | D | N | DN | benign            |
| rs16996652 | NP_002464 | V | E | VE | probably damaging |
| rs16996899 | NP_004979 | A | T | AT | benign            |
| rs16997095 | XP_210042 | T | K | TK | possibly damaging |
| rs16997192 | NP_542970 | D | E | DE | benign            |
| rs16997517 | NP_000386 | P | S | PS | probably damaging |
| rs16997659 | NP_001406 | K | R | KR | benign            |
| rs16997814 | NP_787106 | A | T | AT | benign            |
| rs16998061 | NP_037517 | M | V | MV | probably damaging |
| rs16998350 | NP_000100 | T | S | TS | benign            |
| rs16998350 | NP_003997 | T | S | TS | benign            |
| rs16998350 | NP_003998 | T | S | TS | benign            |
| rs16998350 | NP_004000 | T | S | TS | benign            |
| rs16998350 | NP_004001 | T | S | TS | benign            |
| rs16999010 | XP_045705 | L | F | LF | benign            |
| rs16999334 | NP_055068 | M | V | MV | possibly damaging |
| rs16999484 | NP_004578 | M | T | MT | possibly damaging |
| rs16999593 | NP_001370 | H | R | HR | probably damaging |
| rs17000357 | NP_612143 | H | D | HD | benign            |
| rs17000556 | NP_663745 | T | A | TA | possibly damaging |
| rs17000697 | NP_004891 | S | A | SA | benign            |
| rs17000707 | NP_003939 | I | T | IT | possibly damaging |
| rs17000716 | NP_004891 | K | E | KE | benign            |
| rs17000736 | NP_068594 | R | H | RH | possibly damaging |
| rs17000961 | NP_006230 | S | C | SC | benign            |
| rs17001096 | NP_006107 | D | E | DE | benign            |
| rs17001096 | NP_705717 | D | E | DE | benign            |
| rs17001213 | NP_061881 | T | M | TM | benign            |
| rs17001264 | NP_065863 | R | G | RG | possibly damaging |
| rs17001276 | NP_060585 | V | I | VI | benign            |
| rs17001278 | NP_919307 | E | A | EA | benign            |
| rs17001344 | NP_036598 | L | P | LP | possibly damaging |
| rs17001458 | NP_001602 | V | I | VI | benign            |
| rs17001730 | XP_375569 | L | V | LV | benign            |
| rs17001767 | XP_039385 | S | C | SC | benign            |
| rs17001885 | NP_848650 | I | V | IV | benign            |
| rs17001889 | NP_848650 | E | D | ED | benign            |
| rs17001958 | NP_110451 | R | C | RC | possibly damaging |
| rs17002012 | XP_093024 | A | T | AT | benign            |
| rs17002243 | NP_071381 | I | L | IL | benign            |
| rs17002693 | NP_038472 | L | H | LH | possibly damaging |
| rs17002714 | NP_004590 | M | L | ML | benign            |

|            |           |   |   |    |                   |
|------------|-----------|---|---|----|-------------------|
| rs17002790 | NP_689826 | Q | E | QE | benign            |
| rs17002802 | NP_689826 | C | F | CF | benign            |
| rs17002850 | NP_000097 | R | H | RH | probably damaging |
| rs17002853 | NP_000097 | L | P | LP | benign            |
| rs17002865 | NP_852469 | Y | C | YC | probably damaging |
| rs17002865 | NP_005641 | Y | C | YC | probably damaging |
| rs17002888 | NP_852469 | S | N | SN | benign            |
| rs17002888 | NP_005641 | S | N | SN | benign            |
| rs17002890 | NP_852469 | M | I | MI | possibly damaging |
| rs17002890 | NP_005641 | M | I | MI | possibly damaging |
| rs17003048 | NP_666017 | N | K | NK | benign            |
| rs17003071 | NP_065926 | D | H | DH | possibly damaging |
| rs17003071 | NP_116252 | D | H | DH | possibly damaging |
| rs17003071 | NP_996672 | D | H | DH | possibly damaging |
| rs17003085 | XP_372226 | N | S | NS | benign            |
| rs17003166 | NP_996672 | T | M | TM | benign            |
| rs17003213 | NP_996672 | A | V | AV | benign            |
| rs17003394 | NP_705843 | R | C | RC | possibly damaging |
| rs17003397 | NP_705843 | T | M | TM | benign            |
| rs17003398 | NP_705843 | E | K | EK | benign            |
| rs17003712 | XP_496704 | L | F | LF | benign            |
| rs17003955 | NP_036414 | P | T | PT | benign            |
| rs17004668 | NP_859016 | V | M | VM | benign            |
| rs17004823 | NP_036427 | D | N | DN | benign            |
| rs17004876 | XP_496518 | D | N | DN | benign            |
| rs17004876 | NP_038347 | N | D | ND | benign            |
| rs17005371 | NP_919224 | P | S | PS | benign            |
| rs17005371 | NP_919303 | P | S | PS | benign            |
| rs17005371 | NP_919304 | P | S | PS | possibly damaging |
| rs17005371 | NP_004793 | P | S | PS | possibly damaging |
| rs17005441 | NP_057381 | T | S | TS | benign            |
| rs17005979 | NP_775921 | V | G | VG | benign            |
| rs17006082 | NP_689831 | N | K | NK | benign            |
| rs17006138 | NP_059517 | S | C | SC | benign            |
| rs17006138 | NP_059522 | S | C | SC | possibly damaging |
| rs17006138 | NP_001608 | S | C | SC | possibly damaging |
| rs17006436 | NP_056532 | P | S | PS | possibly damaging |
| rs17006625 | NP_003875 | N | S | NS | benign            |
| rs17006677 | NP_005782 | L | M | LM | benign            |
| rs17006794 | NP_598375 | V | M | VM | benign            |
| rs17006830 | NP_722548 | D | N | DN | benign            |
| rs17006830 | NP_758861 | D | N | DN | benign            |
| rs17006830 | NP_758862 | D | N | DN | benign            |
| rs17006830 | NP_758863 | D | N | DN | benign            |
| rs17006830 | NP_758864 | D | N | DN | benign            |
| rs17006830 | NP_758865 | D | N | DN | benign            |

|            |           |   |   |    |                   |
|------------|-----------|---|---|----|-------------------|
| rs17006830 | NP_758866 | D | N | DN | benign            |
| rs17006830 | NP_758867 | D | N | DN | benign            |
| rs17006830 | NP_758868 | D | N | DN | benign            |
| rs17006830 | NP_758869 | D | N | DN | benign            |
| rs17006830 | NP_758870 | D | N | DN | benign            |
| rs17006830 | NP_758871 | D | N | DN | benign            |
| rs17006830 | NP_002380 | D | N | DN | benign            |
| rs17006830 | NP_758860 | D | N | DN | benign            |
| rs17006837 | NP_598375 | L | P | LP | possibly damaging |
| rs17007544 | XP_371488 | K | R | KR | benign            |
| rs17007988 | XP_497978 | D | H | DH | possibly damaging |
| rs17008180 | XP_496711 | K | Q | KQ | possibly damaging |
| rs17008395 | NP_001968 | V | A | VA | benign            |
| rs17008716 | NP_036535 | L | P | LP | probably damaging |
| rs17008839 | XP_497976 | Q | R | QR | benign            |
| rs17008841 | XP_497976 | C | R | CR | probably damaging |
| rs17008947 | XP_067904 | V | I | VI | benign            |
| rs17009684 | NP_078858 | K | E | KE | benign            |
| rs17009792 | NP_597813 | S | N | SN | benign            |
| rs17009792 | NP_597812 | S | N | SN | benign            |
| rs17009792 | NP_067019 | S | N | SN | benign            |
| rs17009792 | NP_201580 | S | N | SN | benign            |
| rs17009858 | NP_078858 | A | T | AT | benign            |
| rs17009944 | XP_371514 | A | S | AS | benign            |
| rs17009998 | XP_376068 | S | F | SF | benign            |
| rs17010021 | NP_115992 | I | F | IF | benign            |
| rs17010106 | NP_689801 | Y | S | YS | probably damaging |
| rs17010210 | NP_653176 | H | Y | HY | benign            |
| rs17011368 | NP_000370 | I | V | IV | benign            |
| rs17011882 | NP_079455 | A | G | AG | benign            |
| rs17012064 | NP_542415 | S | P | SP | benign            |
| rs17012064 | NP_542416 | S | P | SP | benign            |
| rs17012064 | NP_006255 | S | P | SP | benign            |
| rs17012064 | NP_542414 | S | P | SP | benign            |
| rs17012268 | NP_060205 | R | H | RH | possibly damaging |
| rs17012533 | XP_495928 | A | T | AT | benign            |
| rs17012739 | NP_055079 | D | E | DE | benign            |
| rs17013076 | XP_104657 | R | H | RH | benign            |
| rs17013181 | NP_004958 | G | R | GR | possibly damaging |
| rs17013182 | NP_004958 | T | A | TA | benign            |
| rs17013238 | NP_113642 | E | K | EK | benign            |
| rs17013285 | NP_064588 | V | I | VI | benign            |
| rs17013371 | NP_878919 | A | T | AT | benign            |
| rs17013371 | NP_060704 | A | T | AT | benign            |
| rs17014118 | XP_496710 | F | L | FL | benign            |
| rs17015215 | NP_006138 | V | I | VI | benign            |



|            |           |   |   |    |                   |
|------------|-----------|---|---|----|-------------------|
| rs17015286 | NP_938022 | R | K | RK | benign            |
| rs17016672 | XP_060278 | T | I | TI | benign            |
| rs17016706 | NP_997195 | S | N | SN | possibly damaging |
| rs17016865 | NP_001059 | T | A | TA | benign            |
| rs17016875 | NP_001059 | T | A | TA | possibly damaging |
| rs17017968 | XP_094074 | I | T | IT | benign            |
| rs17018909 | NP_598011 | V | L | VL | benign            |
| rs17018909 | NP_598012 | V | L | VL | benign            |
| rs17018909 | NP_598013 | V | L | VL | benign            |
| rs17018909 | NP_598014 | V | L | VL | benign            |
| rs17018909 | NP_598010 | V | L | VL | benign            |
| rs17020314 | NP_036556 | P | R | PR | possibly damaging |
| rs17020328 | NP_005751 | K | R | KR | benign            |
| rs17020956 | NP_000706 | A | V | AV | benign            |
| rs17021877 | XP_375834 | A | T | AT | benign            |
| rs17022631 | XP_208658 | T | K | TK | possibly damaging |
| rs17022678 | XP_371284 | P | A | PA | benign            |
| rs17023101 | NP_056651 | L | P | LP | possibly damaging |
| rs17023638 | NP_612373 | S | G | SG | benign            |
| rs17023677 | NP_000853 | T | I | TI | benign            |
| rs17023739 | XP_497702 | K | R | KR | benign            |
| rs17024517 | NP_077719 | V | F | VF | benign            |
| rs17024663 | NP_000839 | F | Y | FY | benign            |
| rs17024663 | NP_000841 | Y | F | YF | benign            |
| rs17024795 | NP_005381 | R | G | RG | probably damaging |
| rs17024904 | NP_689648 | P | H | PH | possibly damaging |
| rs17025409 | NP_660342 | Y | C | YC | probably damaging |
| rs17025464 | NP_660342 | S | N | SN | benign            |
| rs17025503 | XP_049952 | A | T | AT | benign            |
| rs17025864 | NP_003233 | M | V | MV | benign            |
| rs17026871 | NP_777612 | V | A | VA | benign            |
| rs17027133 | NP_006717 | N | S | NS | benign            |
| rs17027298 | XP_086604 | T | I | TI | benign            |
| rs17027505 | NP_899231 | L | S | LS | benign            |
| rs17027591 | XP_497697 | G | E | GE | probably damaging |
| rs17027633 | NP_002548 | E | D | ED | benign            |
| rs17027955 | XP_497651 | V | A | VA | benign            |
| rs17028351 | NP_060484 | G | S | GS | possibly damaging |
| rs17028351 | NP_612563 | G | S | GS | possibly damaging |
| rs17028351 | NP_075044 | G | S | GS | possibly damaging |
| rs17028450 | NP_003267 | R | C | RC | possibly damaging |
| rs17028702 | XP_496634 | R | L | RL | possibly damaging |
| rs17028836 | NP_000659 | H | R | HR | probably damaging |
| rs17029087 | NP_115525 | K | E | KE | benign            |
| rs17029094 | NP_060127 | K | T | KT | benign            |
| rs17029215 | NP_000244 | D | A | DA | benign            |

|            |           |   |   |    |                   |
|------------|-----------|---|---|----|-------------------|
| rs17029613 | NP_078930 | I | V | IV | benign            |
| rs17029945 | XP_045423 | I | V | IV | benign            |
| rs17029947 | NP_683765 | M | L | ML | benign            |
| rs17030365 | NP_777602 | P | T | PT | possibly damaging |
| rs17030648 | NP_071348 | C | R | CR | benign            |
| rs17031056 | NP_940956 | V | I | VI | benign            |
| rs17031056 | NP_071348 | V | I | VI | benign            |
| rs17031279 | NP_060109 | T | M | TM | benign            |
| rs17031297 | NP_742066 | P | T | PT | probably damaging |
| rs17031368 | NP_742066 | N | S | NS | benign            |
| rs17031394 | NP_060109 | T | R | TR | benign            |
| rs17031672 | NP_071881 | T | S | TS | benign            |
| rs17033889 | NP_001050 | A | T | AT | benign            |
| rs17034186 | NP_060034 | I | V | IV | benign            |
| rs17034336 | NP_060034 | R | Q | RQ | benign            |
| rs17034433 | NP_060034 | N | T | NT | benign            |
| rs17034499 | NP_006039 | V | I | VI | benign            |
| rs17035120 | NP_112592 | A | T | AT | benign            |
| rs17035206 | NP_037452 | G | A | GA | benign            |
| rs17035364 | NP_002655 | R | W | RW | possibly damaging |
| rs17035649 | NP_001399 | T | A | TA | benign            |
| rs17035911 | XP_497863 | Y | C | YC | probably damaging |
| rs17036055 | NP_789795 | V | M | VM | benign            |
| rs17036055 | NP_001047 | V | M | VM | benign            |
| rs17036058 | NP_789795 | R | Q | RQ | probably damaging |
| rs17036058 | NP_001047 | R | Q | RQ | probably damaging |
| rs17036063 | XP_376334 | D | H | DH | benign            |
| rs17036091 | NP_789795 | Y | H | YH | probably damaging |
| rs17036091 | NP_001047 | Y | H | YH | probably damaging |
| rs17036104 | NP_789795 | S | A | SA | benign            |
| rs17036104 | NP_001047 | S | A | SA | benign            |
| rs17036112 | NP_789795 | R | T | RT | benign            |
| rs17036112 | NP_001047 | R | T | RT | benign            |
| rs17036148 | XP_497911 | S | R | SR | benign            |
| rs17036153 | XP_497911 | E | D | ED | benign            |
| rs17036300 | NP_775920 | Q | R | QR | benign            |
| rs17036670 | NP_004748 | T | A | TA | benign            |
| rs17036832 | NP_003585 | S | T | ST | benign            |
| rs17036993 | NP_061163 | T | S | TS | benign            |
| rs17036993 | NP_079409 | T | S | TS | benign            |
| rs17037102 | NP_055236 | R | Q | RQ | benign            |
| rs17037287 | XP_371617 | L | F | LF | benign            |
| rs17038126 | NP_004744 | H | N | HN | possibly damaging |
| rs17038204 | NP_689834 | T | M | TM | benign            |
| rs17038387 | XP_208281 | R | Q | RQ | benign            |
| rs17038460 | NP_060552 | T | A | TA | possibly damaging |

|            |           |   |   |    |                   |
|------------|-----------|---|---|----|-------------------|
| rs17038653 | NP_075390 | V | G | VG | probably damaging |
| rs17038657 | NP_075390 | S | W | SW | probably damaging |
| rs17038664 | NP_075390 | M | T | MT | benign            |
| rs17038667 | NP_075390 | T | M | TM | benign            |
| rs17038677 | NP_075390 | I | L | IL | benign            |
| rs17038682 | NP_075390 | H | R | HR | benign            |
| rs17038687 | NP_075390 | Y | C | YC | benign            |
| rs17038692 | NP_075390 | T | N | TN | probably damaging |
| rs17038702 | NP_075389 | Q | E | QE | benign            |
| rs17038707 | NP_075390 | T | S | TS | benign            |
| rs17038766 | NP_998759 | S | A | SA | benign            |
| rs17038766 | NP_115880 | S | A | SA | benign            |
| rs17038795 | XP_371619 | A | T | AT | benign            |
| rs17038956 | XP_293029 | D | V | DV | benign            |
| rs17039250 | NP_758515 | K | N | KN | benign            |
| rs17039250 | NP_006864 | K | N | KN | benign            |
| rs17039273 | NP_075390 | H | R | HR | possibly damaging |
| rs17039283 | NP_075390 | L | M | LM | benign            |
| rs17039293 | NP_075390 | F | Y | FY | possibly damaging |
| rs17039307 | NP_075390 | C | R | CR | benign            |
| rs17039331 | NP_075389 | V | F | VF | benign            |
| rs17039331 | NP_075390 | F | V | FV | possibly damaging |
| rs17039424 | XP_496341 | E | G | EG | benign            |
| rs17039825 | XP_497912 | Q | R | QR | benign            |
| rs17039828 | XP_497912 | H | R | HR | probably damaging |
| rs17039830 | XP_497912 | M | V | MV | benign            |
| rs17039841 | XP_497912 | R | C | RC | probably damaging |
| rs17040068 | NP_057558 | K | T | KT | benign            |
| rs17040196 | NP_115513 | A | T | AT | benign            |
| rs17040250 | NP_055626 | N | D | ND | benign            |
| rs17040344 | NP_892019 | P | S | PS | probably damaging |
| rs17040745 | NP_073153 | H | R | HR | benign            |
| rs17040901 | NP_004792 | Y | N | YN | probably damaging |
| rs17040982 | NP_064501 | K | E | KE | benign            |
| rs17041296 | XP_374987 | E | Q | EQ | benign            |
| rs17041316 | XP_377278 | T | M | TM | possibly damaging |
| rs17041784 | NP_004291 | T | A | TA | benign            |
| rs17041850 | NP_060778 | P | L | PL | probably damaging |
| rs17042066 | NP_612390 | R | Q | RQ | benign            |
| rs17042341 | NP_689728 | R | S | RS | benign            |
| rs17042344 | NP_689728 | N | S | NS | benign            |
| rs17043749 | NP_060822 | T | I | TI | benign            |
| rs17044591 | XP_496632 | E | K | EK | possibly damaging |
| rs17046663 | NP_060510 | R | K | RK | benign            |
| rs17047280 | NP_000564 | H | R | HR | benign            |
| rs17047280 | NP_000642 | H | R | HR | possibly damaging |

|            |              |   |   |    |                   |
|------------|--------------|---|---|----|-------------------|
| rs17047347 | XP_372922    | E | K | EK | benign            |
| rs17047557 | NP_061917    | Y | H | YH | benign            |
| rs17047660 | NP_000642    | K | E | KE | benign            |
| rs17047660 | NP_000564    | K | E | KE | benign            |
| rs17047661 | NP_000642    | R | G | RG | possibly damaging |
| rs17047661 | NP_000564    | R | G | RG | possibly damaging |
| rs17049629 | XP_373033    | P | L | PL | possibly damaging |
| rs17050126 | XP_050219    | M | T | MT | benign            |
| rs17050152 | XP_050219    | A | T | AT | benign            |
| rs17050550 | NP_058212    | A | S | AS | benign            |
| rs17050550 | NP_058213    | A | S | AS | benign            |
| rs17050550 | NP_058214    | A | S | AS | benign            |
| rs17050550 | NP_058434    | A | S | AS | benign            |
| rs17050550 | NP_058436    | A | S | AS | benign            |
| rs17050550 | NP_058437    | A | S | AS | benign            |
| rs17050550 | NP_058438    | A | S | AS | benign            |
| rs17050550 | NP_002533    | A | S | AS | benign            |
| rs17051276 | NP_237223    | S | A | SA | benign            |
| rs17051276 | NP_246273    | S | A | SA | benign            |
| rs17051440 | XP_208097    | D | E | DE | benign            |
| rs17051967 | NP_000123    | M | V | MV | benign            |
| rs17051967 | NP_063916    | M | V | MV | benign            |
| rs17052017 | NP_954635    | S | N | SN | possibly damaging |
| rs17052019 | NP_004378    | D | A | DA | probably damaging |
| rs17052203 | NP_115737    | D | N | DN | benign            |
| rs17052920 | NP_001055    | I | V | IV | benign            |
| rs17053341 | NP_079216    | Q | R | QR | benign            |
| rs17053747 | XP_212241    | G | E | GE | possibly damaging |
| rs17053777 | XP_212238    | M | R | MR | benign            |
| rs17054318 | XP_027307    | L | S | LS | benign            |
| rs17054374 | NP_005537    | R | Q | RQ | benign            |
| rs17054477 | NP_073150    | G | S | GS | benign            |
| rs17054522 | NP_001001343 | P | A | PA | possibly damaging |
| rs17054882 | NP_660204    | E | K | EK | possibly damaging |
| rs17055117 | NP_060337    | K | R | KR | benign            |
| rs17056661 | NP_787103    | C | F | CF | benign            |
| rs17056999 | NP_056039    | A | G | AG | benign            |
| rs17057133 | NP_037522    | I | V | IV | benign            |
| rs17057255 | NP_001970    | R | C | RC | possibly damaging |
| rs17057718 | NP_060033    | V | M | VM | benign            |
| rs17057901 | NP_060962    | E | D | ED | benign            |
| rs17058153 | NP_619636    | M | T | MT | benign            |
| rs17058207 | NP_776194    | D | H | DH | benign            |
| rs17058374 | NP_776194    | A | T | AT | benign            |
| rs17058433 | XP_292193    | I | S | IS | possibly damaging |
| rs17058845 | NP_001448    | E | K | EK | benign            |

|            |           |   |   |    |                   |
|------------|-----------|---|---|----|-------------------|
| rs17058955 | NP_733837 | S | T | ST | benign            |
| rs17059569 | NP_620160 | P | S | PS | benign            |
| rs17060972 | XP_209910 | M | T | MT | possibly damaging |
| rs17060979 | XP_209910 | R | H | RH | benign            |
| rs17061399 | NP_778237 | I | T | IT | possibly damaging |
| rs17061401 | NP_778237 | G | S | GS | benign            |
| rs17061404 | NP_778237 | Y | C | YC | possibly damaging |
| rs17061409 | NP_778237 | A | V | AV | benign            |
| rs17061419 | NP_778237 | V | I | VI | benign            |
| rs17061714 | XP_498281 | M | T | MT | benign            |
| rs17062054 | NP_078837 | E | G | EG | possibly damaging |
| rs17062589 | NP_653245 | Y | C | YC | probably damaging |
| rs17062601 | XP_038664 | G | R | GR | probably damaging |
| rs17063163 | NP_652761 | H | R | HR | possibly damaging |
| rs17063163 | NP_057332 | H | R | HR | possibly damaging |
| rs17063167 | NP_652761 | L | F | LF | benign            |
| rs17063167 | NP_057332 | L | F | LF | benign            |
| rs17064618 | NP_003961 | T | M | TM | benign            |
| rs17064631 | XP_497061 | S | G | SG | possibly damaging |
| rs17064658 | NP_060718 | Q | H | QH | possibly damaging |
| rs17064676 | NP_060718 | I | V | IV | benign            |
| rs17064722 | XP_372121 | S | P | SP | possibly damaging |
| rs17064722 | NP_060046 | P | S | PS | probably damaging |
| rs17065105 | NP_073591 | N | S | NS | benign            |
| rs17065127 | NP_443179 | K | E | KE | benign            |
| rs17065289 | NP_004660 | M | L | ML | benign            |
| rs17065377 | NP_037511 | E | K | EK | benign            |
| rs17065397 | NP_067544 | I | M | IM | benign            |
| rs17065397 | NP_000823 | I | M | IM | benign            |
| rs17065397 | NP_015566 | I | M | IM | benign            |
| rs17065520 | NP_115866 | T | P | TP | possibly damaging |
| rs17066588 | NP_001189 | R | P | RP | benign            |
| rs17066588 | NP_878911 | R | P | RP | possibly damaging |
| rs17066621 | NP_003286 | V | F | VF | possibly damaging |
| rs17066902 | XP_495949 | H | R | HR | possibly damaging |
| rs17066954 | XP_495949 | S | T | ST | benign            |
| rs17067725 | NP_002289 | P | A | PA | benign            |
| rs17067933 | XP_497373 | T | N | TN | benign            |
| rs17067935 | XP_497373 | P | A | PA | probably damaging |
| rs17068451 | XP_371849 | V | M | VM | benign            |
| rs17068463 | NP_114097 | P | L | PL | benign            |
| rs17070905 | NP_891550 | R | Q | RQ | benign            |
| rs17070967 | NP_891550 | K | R | KR | benign            |
| rs17071010 | NP_891550 | K | E | KE | benign            |
| rs17071010 | NP_891551 | K | E | KE | benign            |
| rs17071550 | NP_536723 | M | T | MT | benign            |

|            |           |   |   |    |                   |
|------------|-----------|---|---|----|-------------------|
| rs17071686 | NP_005758 | W | C | WC | probably damaging |
| rs17072097 | NP_005015 | S | A | SA | benign            |
| rs17072146 | NP_005015 | G | D | GD | possibly damaging |
| rs17072159 | XP_372494 | S | P | SP | possibly damaging |
| rs17072218 | NP_006428 | C | R | CR | probably damaging |
| rs17072289 | XP_498129 | T | S | TS | benign            |
| rs17072296 | XP_498129 | M | L | ML | benign            |
| rs17072442 | NP_061063 | K | Q | KQ | benign            |
| rs17073260 | NP_937882 | R | C | RC | possibly damaging |
| rs17073260 | NP_003871 | R | C | RC | possibly damaging |
| rs17073260 | NP_569080 | R | C | RC | possibly damaging |
| rs17073498 | NP_003755 | R | Q | RQ | possibly damaging |
| rs17073511 | XP_166270 | L | Q | LQ | possibly damaging |
| rs17074311 | NP_005981 | P | L | PL | benign            |
| rs17074410 | XP_209668 | Y | C | YC | probably damaging |
| rs17074452 | NP_689490 | M | I | MI | benign            |
| rs17074833 | NP_001555 | S | A | SA | benign            |
| rs17075173 | NP_004120 | V | I | VI | benign            |
| rs17075385 | NP_115521 | S | C | SC | benign            |
| rs17075482 | NP_659456 | D | H | DH | benign            |
| rs17075635 | NP_002347 | K | N | KN | benign            |
| rs17076052 | NP_112580 | R | C | RC | possibly damaging |
| rs17076657 | NP_570718 | I | V | IV | benign            |
| rs17076703 | NP_005992 | D | V | DV | probably damaging |
| rs17076894 | NP_078872 | S | G | SG | possibly damaging |
| rs17076986 | NP_064627 | E | D | ED | benign            |
| rs17077022 | NP_003232 | I | V | IV | benign            |
| rs17077958 | NP_060831 | Y | C | YC | probably damaging |
| rs17078601 | NP_055178 | P | A | PA | probably damaging |
| rs17078605 | NP_055178 | V | A | VA | benign            |
| rs17078659 | XP_497921 | D | N | DN | benign            |
| rs17078857 | NP_000834 | T | S | TS | benign            |
| rs17078874 | NP_000834 | A | V | AV | benign            |
| rs17078877 | NP_000834 | M | V | MV | benign            |
| rs17078894 | NP_000834 | V | F | VF | benign            |
| rs17078896 | NP_000834 | I | F | IF | benign            |
| rs17078898 | NP_000834 | E | V | EV | probably damaging |
| rs17078901 | NP_000834 | E | K | EK | benign            |
| rs17078944 | NP_079026 | A | E | AE | benign            |
| rs17078944 | NP_078788 | E | A | EA | benign            |
| rs17078988 | XP_293828 | T | A | TA | benign            |
| rs17078991 | XP_293828 | E | D | ED | benign            |
| rs17079086 | NP_002935 | F | S | FS | possibly damaging |
| rs17079425 | XP_291064 | R | H | RH | benign            |
| rs17079973 | XP_208320 | K | E | KE | benign            |
| rs17079979 | XP_208320 | V | I | VI | benign            |

|            |           |   |   |    |                   |
|------------|-----------|---|---|----|-------------------|
| rs17080065 | NP_079057 | N | K | NK | benign            |
| rs17080126 | NP_006783 | E | D | ED | benign            |
| rs17080147 | NP_115605 | Q | R | QR | benign            |
| rs17080284 | NP_003356 | D | H | DH | possibly damaging |
| rs17080346 | NP_071916 | S | N | SN | benign            |
| rs17080381 | XP_027307 | Q | R | QR | benign            |
| rs17080410 | XP_027307 | V | A | VA | benign            |
| rs17080781 | XP_498030 | R | C | RC | possibly damaging |
| rs17080791 | XP_498030 | F | S | FS | possibly damaging |
| rs17081389 | NP_060921 | P | A | PA | possibly damaging |
| rs17081517 | XP_496634 | R | C | RC | probably damaging |
| rs17081880 | XP_496783 | T | P | TP | benign            |
| rs17082206 | NP_775901 | K | R | KR | benign            |
| rs17082236 | NP_056108 | A | S | AS | benign            |
| rs17082236 | NP_598411 | A | S | AS | benign            |
| rs17082236 | NP_149062 | A | S | AS | benign            |
| rs17082236 | NP_892006 | A | S | AS | benign            |
| rs17082709 | NP_149062 | L | V | LV | benign            |
| rs17082709 | NP_892006 | L | V | LV | benign            |
| rs17083426 | NP_114431 | S | N | SN | benign            |
| rs17083436 | NP_898865 | S | N | SN | benign            |
| rs17084492 | NP_006637 | S | L | SL | possibly damaging |
| rs17084873 | NP_055454 | L | V | LV | benign            |
| rs17084927 | NP_937793 | Q | R | QR | benign            |
| rs17085222 | XP_212238 | D | E | DE | benign            |
| rs17085222 | XP_212241 | E | D | ED | benign            |
| rs17085228 | XP_212241 | K | M | KM | benign            |
| rs17085228 | XP_212238 | M | K | MK | benign            |
| rs17085349 | NP_000973 | F | S | FS | possibly damaging |
| rs17085612 | NP_690876 | L | F | LF | benign            |
| rs17086286 | NP_694821 | A | G | AG | benign            |
| rs17086286 | NP_620416 | A | G | AG | benign            |
| rs17087233 | NP_005566 | S | T | ST | benign            |
| rs17089289 | XP_058931 | A | V | AV | benign            |
| rs17090763 | NP_116208 | T | P | TP | benign            |
| rs17090835 | NP_071404 | P | R | PR | probably damaging |
| rs17090883 | XP_498127 | H | R | HR | benign            |
| rs17090972 | NP_776249 | Q | K | QK | benign            |
| rs17091146 | NP_064445 | I | V | IV | benign            |
| rs17091178 | NP_000504 | A | V | AV | benign            |
| rs17091204 | NP_001447 | S | L | SL | possibly damaging |
| rs17091516 | XP_113763 | A | G | AG | benign            |
| rs17092079 | NP_054790 | N | S | NS | benign            |
| rs17092104 | NP_003044 | L | V | LV | benign            |
| rs17092144 | NP_003044 | R | Q | RQ | possibly damaging |
| rs17092199 | XP_371398 | P | T | PT | benign            |

|            |           |   |   |    |                   |
|------------|-----------|---|---|----|-------------------|
| rs17092216 | NP_689805 | R | H | RH | benign            |
| rs17092662 | NP_057501 | A | T | AT | benign            |
| rs17092706 | NP_009117 | Q | E | QE | benign            |
| rs17092928 | NP_690051 | N | S | NS | benign            |
| rs17093080 | NP_848567 | T | K | TK | possibly damaging |
| rs17093294 | NP_068801 | V | I | VI | benign            |
| rs17093689 | XP_092778 | Y | C | YC | probably damaging |
| rs17093828 | NP_002101 | P | Q | PQ | probably damaging |
| rs17094077 | NP_689658 | L | P | LP | benign            |
| rs17094434 | NP_001240 | K | R | KR | benign            |
| rs17094821 | NP_057735 | S | A | SA | benign            |
| rs17094900 | NP_660301 | M | I | MI | benign            |
| rs17095304 | NP_803877 | A | V | AV | benign            |
| rs17095369 | NP_597703 | G | V | GV | benign            |
| rs17095369 | XP_374801 | G | V | GV | probably damaging |
| rs17095653 | XP_371259 | I | V | IV | benign            |
| rs17095822 | NP_001880 | E | K | EK | benign            |
| rs17095919 | NP_000631 | W | R | WR | benign            |
| rs17096291 | NP_653182 | V | A | VA | benign            |
| rs17096797 | NP_940901 | F | C | FC | possibly damaging |
| rs17096845 | NP_061759 | L | P | LP | benign            |
| rs17096901 | NP_056484 | I | T | IT | benign            |
| rs17096934 | NP_060239 | R | H | RH | benign            |
| rs17096946 | NP_061763 | E | K | EK | benign            |
| rs17096954 | NP_061993 | E | G | EG | possibly damaging |
| rs17096961 | NP_061993 | S | N | SN | benign            |
| rs17096969 | NP_066008 | D | E | DE | possibly damaging |
| rs17097185 | NP_114382 | H | Q | HQ | benign            |
| rs17097185 | NP_061735 | H | Q | HQ | benign            |
| rs17097231 | NP_061746 | P | R | PR | probably damaging |
| rs17097251 | NP_114476 | T | M | TM | benign            |
| rs17097251 | NP_061743 | T | M | TM | benign            |
| rs17097274 | NP_114478 | L | F | LF | possibly damaging |
| rs17097274 | NP_061744 | L | F | LF | possibly damaging |
| rs17097468 | NP_004077 | E | G | EG | possibly damaging |
| rs17097802 | NP_002926 | T | R | TR | benign            |
| rs17097904 | NP_542395 | R | W | RW | probably damaging |
| rs17098707 | NP_005299 | Q | L | QL | benign            |
| rs17099008 | NP_004762 | I | L | IL | benign            |
| rs17099014 | NP_004762 | D | N | DN | benign            |
| rs17099240 | NP_004265 | N | S | NS | benign            |
| rs17099248 | XP_063336 | V | G | VG | possibly damaging |
| rs17099370 | NP_114120 | R | L | RL | benign            |
| rs17099455 | NP_066284 | A | T | AT | benign            |
| rs17099476 | NP_005545 | V | I | VI | benign            |
| rs17099476 | NP_005546 | V | I | VI | benign            |



|            |           |   |   |    |                   |
|------------|-----------|---|---|----|-------------------|
| rs17099587 | NP_004265 | T | A | TA | benign            |
| rs17099969 | XP_370652 | R | Q | RQ | benign            |
| rs17100686 | NP_665876 | R | Q | RQ | benign            |
| rs17100920 | XP_375105 | Q | E | QE | benign            |
| rs17101180 | NP_060125 | S | F | SF | possibly damaging |
| rs17101193 | XP_166086 | N | K | NK | benign            |
| rs17101262 | NP_004554 | G | S | GS | possibly damaging |
| rs17101962 | NP_612485 | A | V | AV | benign            |
| rs17101995 | NP_071356 | S | T | ST | benign            |
| rs17102002 | NP_071356 | V | L | VL | benign            |
| rs17102042 | XP_372509 | V | M | VM | benign            |
| rs17102066 | NP_060209 | V | I | VI | benign            |
| rs17102152 | NP_950245 | N | K | NK | benign            |
| rs17102311 | NP_036593 | P | S | PS | possibly damaging |
| rs17102313 | NP_036593 | G | D | GD | possibly damaging |
| rs17102531 | XP_290559 | A | T | AT | benign            |
| rs17102592 | NP_000770 | F | C | FC | benign            |
| rs17102750 | NP_038476 | D | E | DE | benign            |
| rs17102750 | NP_872589 | D | E | DE | benign            |
| rs17102752 | NP_038476 | D | N | DN | benign            |
| rs17102752 | NP_872589 | D | N | DN | benign            |
| rs17102999 | NP_055196 | T | I | TI | possibly damaging |
| rs17103066 | NP_006818 | R | G | RG | probably damaging |
| rs17103567 | NP_443121 | Q | K | QK | benign            |
| rs17103567 | NP_001214 | K | Q | KQ | possibly damaging |
| rs17103567 | NP_150634 | K | Q | KQ | possibly damaging |
| rs17103671 | NP_065099 | D | G | DG | possibly damaging |
| rs17103672 | XP_370756 | I | V | IV | benign            |
| rs17104086 | NP_060442 | V | E | VE | benign            |
| rs17104086 | NP_060396 | V | E | VE | possibly damaging |
| rs17104428 | XP_375087 | M | V | MV | benign            |
| rs17104534 | NP_001163 | G | R | GR | possibly damaging |
| rs17104742 | NP_919227 | P | L | PL | probably damaging |
| rs17104991 | NP_085134 | W | C | WC | probably damaging |
| rs17106156 | XP_497686 | L | P | LP | possibly damaging |
| rs17106351 | XP_063315 | R | H | RH | benign            |
| rs17106411 | NP_116235 | N | T | NT | benign            |
| rs17106909 | NP_689647 | G | R | GR | possibly damaging |
| rs17107176 | XP_056434 | T | S | TS | benign            |
| rs17107198 | NP_004144 | T | M | TM | possibly damaging |
| rs17107203 | NP_004144 | V | M | VM | benign            |
| rs17107315 | NP_003113 | N | S | NS | benign            |
| rs17107368 | NP_997255 | D | E | DE | benign            |
| rs17108112 | NP_055880 | V | A | VA | benign            |
| rs17108127 | NP_055880 | M | L | ML | benign            |
| rs17108378 | NP_653189 | V | I | VI | benign            |

|            |           |   |   |    |                   |
|------------|-----------|---|---|----|-------------------|
| rs17109109 | NP_005921 | N | S | NS | benign            |
| rs17109109 | NP_976230 | N | S | NS | benign            |
| rs17109109 | NP_976231 | N | S | NS | benign            |
| rs17109109 | NP_976229 | N | S | NS | benign            |
| rs17109109 | NP_976232 | N | S | NS | benign            |
| rs17109261 | NP_078853 | H | R | HR | benign            |
| rs17109853 | NP_000186 | A | T | AT | benign            |
| rs17109924 | NP_003658 | V | A | VA | benign            |
| rs17110107 | NP_003558 | Q | H | QH | possibly damaging |
| rs17110155 | NP_113623 | T | M | TM | benign            |
| rs17110268 | NP_000762 | R | C | RC | probably damaging |
| rs17110563 | NP_775489 | P | S | PS | probably damaging |
| rs17110744 | NP_068600 | A | T | AT | benign            |
| rs17111188 | NP_009041 | K | N | KN | benign            |
| rs17111579 | NP_963889 | A | P | AP | benign            |
| rs17112015 | XP_497678 | R | Q | RQ | benign            |
| rs17112076 | NP_689522 | E | K | EK | benign            |
| rs17112598 | NP_116289 | Q | R | QR | benign            |
| rs17112809 | NP_071757 | V | I | VI | benign            |
| rs17112895 | NP_057196 | R | Q | RQ | benign            |
| rs17113157 | NP_056305 | S | R | SR | benign            |
| rs17113164 | XP_495845 | D | E | DE | benign            |
| rs17113381 | NP_005328 | P | H | PH | probably damaging |
| rs17113412 | NP_653191 | E | G | EG | possibly damaging |
| rs17113607 | NP_114144 | G | E | GE | possibly damaging |
| rs17113613 | NP_068602 | V | I | VI | benign            |
| rs17113628 | NP_000992 | I | V | IV | benign            |
| rs17113823 | XP_063202 | D | A | DA | benign            |
| rs17114261 | XP_372500 | V | L | VL | benign            |
| rs17114309 | XP_292227 | R | C | RC | possibly damaging |
| rs17114336 | XP_496368 | I | M | IM | benign            |
| rs17114388 | NP_055877 | S | G | SG | benign            |
| rs17114555 | NP_000553 | D | N | DN | possibly damaging |
| rs17114930 | NP_061834 | D | E | DE | benign            |
| rs17115182 | NP_008974 | P | S | PS | possibly damaging |
| rs17115709 | NP_004562 | T | A | TA | benign            |
| rs17116056 | NP_077816 | S | Y | SY | possibly damaging |
| rs17116138 | NP_006019 | V | I | VI | benign            |
| rs17116471 | NP_000485 | T | A | TA | benign            |
| rs17116471 | NP_570134 | T | A | TA | benign            |
| rs17116709 | XP_209695 | E | Q | EQ | benign            |
| rs17116710 | XP_209695 | R | H | RH | possibly damaging |
| rs17117295 | NP_003947 | L | P | LP | possibly damaging |
| rs17117678 | NP_660286 | I | L | IL | benign            |
| rs17117699 | NP_660286 | F | C | FC | possibly damaging |
| rs17117720 | NP_660286 | P | L | PL | probably damaging |

|            |           |   |   |    |                   |
|------------|-----------|---|---|----|-------------------|
| rs17117841 | XP_371263 | M | V | MV | probably damaging |
| rs17118042 | NP_073629 | P | T | PT | possibly damaging |
| rs17118103 | XP_055481 | C | S | CS | probably damaging |
| rs17118154 | NP_008859 | E | D | ED | benign            |
| rs17118292 | NP_001973 | M | I | MI | benign            |
| rs17118426 | NP_653177 | P | S | PS | probably damaging |
| rs17119218 | NP_061725 | W | S | WS | benign            |
| rs17119218 | NP_114067 | W | S | WS | probably damaging |
| rs17119255 | NP_114065 | T | A | TA | benign            |
| rs17119255 | NP_061724 | T | A | TA | benign            |
| rs17119344 | NP_005370 | T | I | TI | benign            |
| rs17119477 | NP_061762 | L | P | LP | benign            |
| rs17120062 | NP_653306 | N | K | NK | possibly damaging |
| rs17120308 | NP_149034 | C | R | CR | probably damaging |
| rs17120425 | NP_057080 | V | I | VI | benign            |
| rs17120784 | XP_495921 | T | I | TI | possibly damaging |
| rs17121403 | NP_000636 | Q | R | QR | benign            |
| rs17121403 | NP_000637 | Q | R | QR | benign            |
| rs17121403 | NP_000635 | Q | R | QR | benign            |
| rs17121464 | NP_000636 | R | Q | RQ | benign            |
| rs17121464 | NP_000637 | R | Q | RQ | benign            |
| rs17121464 | NP_000635 | R | Q | RQ | benign            |
| rs17121493 | NP_001549 | I | V | IV | benign            |
| rs17121605 | NP_689542 | I | N | IN | probably damaging |
| rs17121745 | NP_660155 | T | A | TA | benign            |
| rs17121818 | NP_004579 | R | H | RH | benign            |
| rs17121819 | NP_004579 | R | W | RW | possibly damaging |
| rs17121881 | NP_694938 | N | I | NI | benign            |
| rs17121966 | NP_938016 | M | V | MV | benign            |
| rs17122201 | NP_008870 | S | N | SN | benign            |
| rs17122412 | NP_004187 | K | E | KE | benign            |
| rs17122711 | NP_872325 | P | L | PL | probably damaging |
| rs17122769 | NP_005179 | V | I | VI | benign            |
| rs17122812 | XP_062553 | V | A | VA | benign            |
| rs17122815 | NP_005790 | C | R | CR | probably damaging |
| rs17122815 | NP_795352 | C | R | CR | probably damaging |
| rs17122815 | NP_795353 | C | R | CR | probably damaging |
| rs17123261 | NP_001231 | H | R | HR | possibly damaging |
| rs17123306 | NP_859063 | G | S | GS | benign            |
| rs17123569 | NP_006000 | S | T | ST | benign            |
| rs17123590 | NP_008823 | R | P | RP | possibly damaging |
| rs17123590 | NP_787044 | R | P | RP | probably damaging |
| rs17123590 | NP_787045 | R | P | RP | probably damaging |
| rs17123590 | NP_787046 | R | P | RP | probably damaging |
| rs17123951 | NP_542406 | A | T | AT | benign            |
| rs17124391 | NP_848561 | A | E | AE | benign            |

|            |           |   |   |    |                   |
|------------|-----------|---|---|----|-------------------|
| rs17124662 | NP_060888 | S | N | SN | benign            |
| rs17124677 | NP_060888 | G | E | GE | probably damaging |
| rs17124706 | NP_954660 | F | L | FL | benign            |
| rs17124706 | NP_443111 | F | L | FL | possibly damaging |
| rs17124706 | NP_954658 | F | L | FL | possibly damaging |
| rs17124715 | NP_954660 | N | T | NT | benign            |
| rs17124715 | NP_443111 | N | T | NT | benign            |
| rs17124715 | NP_954658 | N | T | NT | benign            |
| rs17124890 | NP_112509 | P | L | PL | probably damaging |
| rs17124927 | NP_004684 | M | T | MT | probably damaging |
| rs17124969 | NP_031387 | D | G | DG | possibly damaging |
| rs17125106 | XP_371257 | F | I | FI | possibly damaging |
| rs17125266 | NP_036423 | I | M | IM | benign            |
| rs17125432 | NP_004661 | M | L | ML | benign            |
| rs17125721 | NP_015557 | E | G | EG | benign            |
| rs17125721 | NP_000012 | E | G | EG | benign            |
| rs17125721 | NP_015558 | E | G | EG | possibly damaging |
| rs17126173 | XP_372471 | F | L | FL | benign            |
| rs17126331 | XP_370765 | N | H | NH | benign            |
| rs17126352 | XP_370765 | V | I | VI | benign            |
| rs17126354 | XP_370765 | A | V | AV | benign            |
| rs17126462 | XP_372471 | P | H | PH | probably damaging |
| rs17127015 | NP_060111 | G | D | GD | possibly damaging |
| rs17127066 | NP_004661 | V | M | VM | benign            |
| rs17127223 | XP_029353 | A | E | AE | benign            |
| rs17127716 | NP_002294 | T | A | TA | benign            |
| rs17127898 | NP_004230 | M | L | ML | benign            |
| rs17127947 | XP_291838 | L | R | LR | possibly damaging |
| rs17127950 | XP_291838 | I | V | IV | benign            |
| rs17128116 | NP_009017 | L | P | LP | benign            |
| rs17128175 | XP_372436 | M | V | MV | benign            |
| rs17128187 | XP_372437 | T | S | TS | benign            |
| rs17128190 | XP_166777 | S | T | ST | benign            |
| rs17128199 | XP_372436 | G | R | GR | possibly damaging |
| rs17128275 | NP_055565 | T | I | TI | possibly damaging |
| rs17128366 | NP_060841 | F | Y | FY | benign            |
| rs17128518 | NP_060841 | V | I | VI | benign            |
| rs17128572 | NP_005104 | A | G | AG | benign            |
| rs17128789 | XP_166767 | G | E | GE | possibly damaging |
| rs17129219 | NP_005920 | A | T | AT | probably damaging |
| rs17129772 | NP_001550 | M | V | MV | benign            |
| rs17129792 | NP_001550 | R | Q | RQ | benign            |
| rs17130717 | NP_002044 | E | D | ED | benign            |
| rs17130745 | NP_443173 | K | E | KE | benign            |
| rs17130763 | NP_443174 | E | Q | EQ | benign            |
| rs17130769 | XP_496370 | G | S | GS | benign            |

|            |           |   |   |    |                   |
|------------|-----------|---|---|----|-------------------|
| rs17131242 | NP_958357 | M | V | MV | benign            |
| rs17131602 | NP_899065 | K | R | KR | benign            |
| rs17131635 | XP_497688 | R | Q | RQ | benign            |
| rs17131640 | XP_497688 | V | A | VA | benign            |
| rs17131745 | XP_371261 | A | P | AP | probably damaging |
| rs17131746 | NP_056165 | D | N | DN | possibly damaging |
| rs17131753 | XP_497686 | P | S | PS | benign            |
| rs17131766 | XP_496374 | V | I | VI | benign            |
| rs17131780 | XP_015717 | E | D | ED | benign            |
| rs17131782 | XP_015717 | A | T | AT | benign            |
| rs17131795 | XP_497680 | S | Y | SY | benign            |
| rs17131854 | XP_498223 | G | S | GS | probably damaging |
| rs17131857 | XP_498223 | H | R | HR | benign            |
| rs17131913 | XP_498223 | A | V | AV | benign            |
| rs17131927 | XP_496902 | F | S | FS | probably damaging |
| rs17132047 | NP_006333 | C | Y | CY | benign            |
| rs17132393 | NP_061111 | D | H | DH | benign            |
| rs17132395 | NP_061111 | R | S | RS | benign            |
| rs17132399 | NP_061111 | A | P | AP | benign            |
| rs17132405 | NP_061111 | D | H | DH | possibly damaging |
| rs17132548 | XP_498961 | D | G | DG | possibly damaging |
| rs17132603 | XP_498015 | G | E | GE | benign            |
| rs17132638 | XP_498013 | Y | C | YC | probably damaging |
| rs17132929 | XP_498018 | L | P | LP | possibly damaging |
| rs17133018 | XP_497046 | T | A | TA | benign            |
| rs17133080 | XP_497051 | P | T | PT | possibly damaging |
| rs17133693 | NP_113624 | K | R | KR | benign            |
| rs17134009 | NP_150644 | A | V | AV | benign            |
| rs17134009 | NP_000964 | A | V | AV | benign            |
| rs17134127 | NP_056013 | A | P | AP | benign            |
| rs17134128 | NP_056013 | D | N | DN | benign            |
| rs17134592 | NP_001809 | L | V | LV | benign            |
| rs17134666 | XP_375148 | V | I | VI | benign            |
| rs17134683 | XP_496034 | V | A | VA | benign            |
| rs17134743 | NP_077078 | R | Q | RQ | benign            |
| rs17134743 | NP_003285 | R | Q | RQ | benign            |
| rs17134763 | NP_000508 | P | L | PL | probably damaging |
| rs17135251 | NP_077078 | V | A | VA | benign            |
| rs17135251 | NP_003285 | V | A | VA | benign            |
| rs17135737 | NP_006444 | S | P | SP | possibly damaging |
| rs17135779 | NP_000287 | M | V | MV | possibly damaging |
| rs17135782 | NP_000287 | Q | E | QE | benign            |
| rs17135873 | NP_659469 | I | V | IV | benign            |
| rs17135884 | XP_497482 | V | D | VD | possibly damaging |
| rs17135923 | NP_659469 | G | A | GA | possibly damaging |
| rs17136078 | NP_872440 | N | I | NI | possibly damaging |

|            |           |   |   |    |                   |
|------------|-----------|---|---|----|-------------------|
| rs17136117 | NP_000895 | E | G | EG | possibly damaging |
| rs17136118 | NP_659469 | Y | C | YC | possibly damaging |
| rs17136239 | NP_683762 | Q | R | QR | benign            |
| rs17136464 | NP_115820 | A | T | AT | benign            |
| rs17137007 | NP_078811 | A | V | AV | benign            |
| rs17137110 | XP_496034 | P | S | PS | benign            |
| rs17137190 | NP_055423 | G | D | GD | benign            |
| rs17137215 | NP_631909 | E | D | ED | benign            |
| rs17137230 | NP_631909 | P | S | PS | benign            |
| rs17137481 | NP_061170 | N | S | NS | benign            |
| rs17137489 | XP_370838 | A | E | AE | possibly damaging |
| rs17137489 | XP_496050 | E | A | EA | possibly damaging |
| rs17138274 | XP_380121 | C | Y | CY | probably damaging |
| rs17138497 | XP_496888 | M | I | MI | benign            |
| rs17138632 | NP_776161 | V | F | VF | benign            |
| rs17138681 | NP_776161 | V | I | VI | benign            |
| rs17139320 | NP_699194 | H | R | HR | possibly damaging |
| rs17141036 | NP_000639 | V | I | VI | benign            |
| rs17141036 | NP_000638 | V | I | VI | benign            |
| rs17142503 | NP_877439 | P | L | PL | probably damaging |
| rs17143165 | NP_079189 | I | T | IT | benign            |
| rs17143175 | XP_374765 | P | S | PS | possibly damaging |
| rs17143212 | XP_377933 | T | I | TI | benign            |
| rs17143304 | NP_848654 | A | T | AT | possibly damaging |
| rs17144072 | NP_005754 | D | N | DN | possibly damaging |
| rs17144210 | NP_006035 | T | I | TI | benign            |
| rs17144625 | NP_060424 | A | T | AT | benign            |
| rs17145454 | NP_000405 | W | R | WR | probably damaging |
| rs17145468 | NP_115797 | D | E | DE | benign            |
| rs17145468 | NP_003379 | D | E | DE | benign            |
| rs17145833 | NP_115534 | K | R | KR | benign            |
| rs17145833 | NP_683738 | K | R | KR | benign            |
| rs17145838 | NP_115534 | C | R | CR | probably damaging |
| rs17145838 | NP_683738 | C | R | CR | probably damaging |
| rs17145855 | NP_659407 | T | A | TA | benign            |
| rs17145879 | XP_498040 | V | M | VM | benign            |
| rs17145940 | NP_942150 | W | R | WR | benign            |
| rs17146009 | NP_849149 | D | N | DN | benign            |
| rs17146196 | XP_496900 | A | G | AG | benign            |
| rs17146406 | NP_078774 | S | L | SL | benign            |
| rs17146650 | XP_496697 | S | P | SP | benign            |
| rs17146650 | XP_496698 | S | P | SP | benign            |
| rs17146691 | NP_004918 | T | A | TA | benign            |
| rs17146914 | NP_079460 | N | S | NS | benign            |
| rs17146927 | XP_496902 | Y | S | YS | probably damaging |
| rs17146960 | XP_166871 | S | T | ST | benign            |

|            |           |   |   |    |                   |
|------------|-----------|---|---|----|-------------------|
| rs17147624 | NP_700359 | I | R | IR | probably damaging |
| rs17147624 | NP_009061 | I | R | IR | probably damaging |
| rs17147682 | NP_061334 | K | R | KR | benign            |
| rs17147787 | NP_663620 | D | E | DE | benign            |
| rs17147792 | NP_663620 | T | S | TS | benign            |
| rs17147793 | NP_009068 | G | V | GV | probably damaging |
| rs17147987 | NP_000191 | R | Q | RQ | benign            |
| rs17148058 | XP_372387 | M | R | MR | probably damaging |
| rs17148149 | XP_168530 | R | Q | RQ | benign            |
| rs17148168 | NP_066295 | E | Q | EQ | benign            |
| rs17148168 | NP_783729 | E | Q | EQ | benign            |
| rs17148500 | NP_775493 | R | C | RC | probably damaging |
| rs17149023 | NP_005329 | M | K | MK | possibly damaging |
| rs17149149 | NP_004034 | N | K | NK | possibly damaging |
| rs17149410 | NP_002043 | A | P | AP | benign            |
| rs17149685 | NP_002177 | E | Q | EQ | benign            |
| rs17149685 | NP_789743 | E | Q | EQ | benign            |
| rs17149694 | NP_000918 | S | T | ST | benign            |
| rs17150243 | XP_372393 | W | G | WG | possibly damaging |
| rs17150317 | XP_166825 | I | M | IM | benign            |
| rs17150343 | NP_000836 | I | T | IT | benign            |
| rs17150411 | XP_166805 | R | C | RC | possibly damaging |
| rs17150488 | NP_775759 | K | R | KR | benign            |
| rs17150554 | XP_376921 | R | Q | RQ | benign            |
| rs17150578 | XP_166831 | Y | H | YH | probably damaging |
| rs17150664 | XP_166834 | G | S | GS | benign            |
| rs17150982 | NP_620166 | A | T | AT | benign            |
| rs17151044 | NP_078799 | R | W | RW | probably damaging |
| rs17151160 | XP_376567 | G | V | GV | probably damaging |
| rs17151510 | XP_370557 | T | R | TR | benign            |
| rs17151510 | XP_495809 | T | R | TR | benign            |
| rs17151689 | XP_379881 | W | L | WL | probably damaging |
| rs17151692 | XP_379881 | V | I | VI | benign            |
| rs17151919 | NP_000221 | V | M | VM | benign            |
| rs17151933 | NP_003618 | G | V | GV | benign            |
| rs17152659 | XP_497297 | I | F | IF | benign            |
| rs17152661 | XP_497297 | P | L | PL | possibly damaging |
| rs17152779 | NP_000605 | N | S | NS | benign            |
| rs17152897 | NP_877428 | K | R | KR | benign            |
| rs17152897 | NP_060988 | K | R | KR | benign            |
| rs17153442 | XP_166227 | Q | R | QR | benign            |
| rs17153510 | NP_056423 | A | T | AT | benign            |
| rs17153524 | NP_671724 | R | H | RH | possibly damaging |
| rs17153561 | NP_000366 | K | R | KR | benign            |
| rs17153610 | NP_510868 | E | Q | EQ | benign            |
| rs17153610 | NP_057651 | E | Q | EQ | benign            |

|            |           |   |   |    |                   |
|------------|-----------|---|---|----|-------------------|
| rs17153669 | NP_060650 | V | L | VL | benign            |
| rs17153691 | XP_166898 | F | L | FL | benign            |
| rs17153732 | XP_166899 | I | V | IV | benign            |
| rs17153766 | XP_166900 | E | Q | EQ | possibly damaging |
| rs17153770 | XP_166900 | F | S | FS | possibly damaging |
| rs17153828 | NP_659480 | R | L | RL | benign            |
| rs17153879 | NP_660278 | P | L | PL | probably damaging |
| rs17153882 | NP_660278 | R | S | RS | benign            |
| rs17153976 | NP_660278 | C | F | CF | probably damaging |
| rs17153992 | NP_680090 | S | N | SN | benign            |
| rs17153992 | NP_680091 | S | N | SN | benign            |
| rs17153992 | NP_680092 | S | N | SN | benign            |
| rs17153992 | NP_680093 | S | N | SN | benign            |
| rs17153992 | NP_001899 | S | N | SN | benign            |
| rs17154335 | NP_000432 | V | G | VG | benign            |
| rs17154353 | NP_000432 | G | S | GS | benign            |
| rs17154402 | NP_003921 | S | T | ST | benign            |
| rs17154661 | NP_002282 | V | A | VA | possibly damaging |
| rs17154996 | XP_068889 | E | K | EK | benign            |
| rs17155115 | NP_056031 | A | G | AG | benign            |
| rs17155138 | NP_056031 | P | Q | PQ | benign            |
| rs17155147 | NP_056031 | T | M | TM | benign            |
| rs17155841 | NP_055039 | T | A | TA | benign            |
| rs17155937 | NP_036460 | R | H | RH | benign            |
| rs17157773 | XP_375243 | V | I | VI | benign            |
| rs17158223 | NP_004830 | I | S | IS | benign            |
| rs17158223 | NP_955362 | I | S | IS | benign            |
| rs17158450 | NP_997400 | T | A | TA | benign            |
| rs17158558 | NP_065681 | R | C | RC | possibly damaging |
| rs17158558 | NP_066124 | R | C | RC | possibly damaging |
| rs17158955 | NP_055568 | I | V | IV | benign            |
| rs17159259 | XP_370838 | Q | R | QR | benign            |
| rs17159259 | XP_058720 | R | Q | RQ | benign            |
| rs17159287 | NP_002038 | R | Q | RQ | benign            |
| rs17159388 | NP_078828 | R | Q | RQ | benign            |
| rs17159453 | NP_115598 | S | L | SL | possibly damaging |
| rs17160151 | NP_115823 | S | N | SN | benign            |
| rs17160194 | NP_115823 | N | I | NI | benign            |
| rs17160348 | NP_078828 | V | A | VA | benign            |
| rs17160349 | NP_078828 | Q | R | QR | benign            |
| rs17160442 | NP_647475 | E | D | ED | benign            |
| rs17160443 | NP_647475 | A | S | AS | benign            |
| rs17160444 | NP_647475 | A | V | AV | benign            |
| rs17160446 | NP_647475 | S | T | ST | benign            |
| rs17160775 | XP_372195 | V | I | VI | benign            |
| rs17160850 | XP_376679 | P | A | PA | probably damaging |



|            |           |   |   |    |                   |
|------------|-----------|---|---|----|-------------------|
| rs17160911 | NP_940910 | G | A | GA | benign            |
| rs17161011 | NP_114127 | V | I | VI | benign            |
| rs17161026 | NP_000831 | G | D | GD | benign            |
| rs17161097 | XP_498810 | L | S | LS | benign            |
| rs17161351 | XP_496859 | V | L | VL | benign            |
| rs17161356 | NP_073587 | A | V | AV | benign            |
| rs17161477 | NP_690877 | E | V | EV | possibly damaging |
| rs17161510 | NP_003487 | R | L | RL | probably damaging |
| rs17161815 | XP_375268 | N | K | NK | benign            |
| rs17162358 | NP_002310 | V | M | VM | benign            |
| rs17162549 | NP_004663 | G | A | GA | benign            |
| rs17162563 | XP_378185 | K | E | KE | benign            |
| rs17163024 | XP_498223 | K | R | KR | benign            |
| rs17163640 | NP_006305 | R | W | RW | benign            |
| rs17163979 | XP_496354 | S | A | SA | benign            |
| rs17164077 | NP_003695 | V | M | VM | benign            |
| rs17164164 | NP_795363 | V | L | VL | benign            |
| rs17164829 | NP_079179 | P | H | PH | probably damaging |
| rs17164935 | NP_115822 | R | K | RK | benign            |
| rs17165111 | XP_374489 | G | A | GA | benign            |
| rs17165851 | NP_003678 | G | C | GC | probably damaging |
| rs17165872 | XP_371878 | C | F | CF | probably damaging |
| rs17165906 | XP_371878 | C | F | CF | probably damaging |
| rs17165910 | XP_371878 | E | K | EK | benign            |
| rs17165956 | NP_005859 | K | E | KE | benign            |
| rs17166048 | XP_497031 | D | N | DN | benign            |
| rs17166048 | XP_372092 | N | D | ND | benign            |
| rs17166151 | XP_209728 | R | W | RW | probably damaging |
| rs17166250 | NP_149119 | F | L | FL | benign            |
| rs17167102 | XP_209824 | R | Q | RQ | benign            |
| rs17167553 | NP_653249 | D | Y | DY | probably damaging |
| rs17167927 | XP_295195 | A | P | AP | benign            |
| rs17169357 | XP_294357 | P | T | PT | benign            |
| rs17171345 | NP_647477 | M | I | MI | benign            |
| rs17171345 | NP_001626 | M | I | MI | benign            |
| rs17171594 | NP_064577 | F | S | FS | benign            |
| rs17173049 | NP_006728 | A | T | AT | benign            |
| rs17173051 | NP_703144 | V | I | VI | benign            |
| rs17173080 | XP_498425 | S | A | SA | benign            |
| rs17173081 | NP_055327 | L | V | LV | benign            |
| rs17173097 | NP_055327 | K | R | KR | probably damaging |
| rs17173108 | NP_002246 | T | A | TA | benign            |
| rs17173120 | XP_498425 | G | R | GR | benign            |
| rs17173120 | NP_037421 | R | G | RG | benign            |
| rs17173147 | NP_002775 | H | R | HR | benign            |
| rs17173147 | NP_002773 | R | H | RH | benign            |

|            |           |   |   |    |                   |
|------------|-----------|---|---|----|-------------------|
| rs17173150 | NP_008836 | L | F | LF | benign            |
| rs17173151 | NP_008836 | N | K | NK | benign            |
| rs17173152 | NP_066296 | K | N | KN | benign            |
| rs17173154 | NP_066296 | N | T | NT | benign            |
| rs17173158 | NP_008836 | A | V | AV | benign            |
| rs17173161 | NP_008836 | E | Q | EQ | benign            |
| rs17173162 | NP_008836 | T | A | TA | benign            |
| rs17173163 | NP_008836 | E | K | EK | benign            |
| rs17173163 | NP_112536 | E | K | EK | benign            |
| rs17173221 | NP_060730 | D | E | DE | benign            |
| rs17173249 | NP_037421 | G | R | GR | possibly damaging |
| rs17173249 | XP_498425 | W | R | WR | probably damaging |
| rs17173294 | NP_057287 | M | L | ML | benign            |
| rs17173323 | XP_372191 | R | C | RC | possibly damaging |
| rs17173509 | NP_000210 | G | A | GA | possibly damaging |
| rs17173519 | NP_078987 | V | I | VI | benign            |
| rs17173698 | NP_004661 | E | K | EK | benign            |
| rs17173702 | NP_037532 | R | H | RH | benign            |
| rs17173702 | NP_055189 | R | H | RH | benign            |
| rs17173703 | NP_037532 | A | V | AV | benign            |
| rs17173703 | NP_055189 | A | V | AV | benign            |
| rs17173746 | NP_671724 | A | T | AT | benign            |
| rs17173752 | NP_000366 | V | G | VG | benign            |
| rs17174019 | NP_001459 | D | H | DH | benign            |
| rs17174078 | NP_003877 | H | R | HR | benign            |
| rs17174078 | NP_647450 | H | R | HR | benign            |
| rs17174358 | NP_000108 | S | P | SP | benign            |
| rs17174624 | NP_477352 | G | R | GR | probably damaging |
| rs17178299 | NP_001472 | R | Q | RQ | benign            |
| rs17179194 | NP_878918 | D | N | DN | benign            |
| rs17180362 | NP_005922 | D | N | DN | benign            |
| rs17182272 | NP_003735 | V | I | VI | benign            |
| rs17183577 | NP_060527 | D | V | DV | benign            |
| rs17183769 | NP_055493 | R | K | RK | benign            |
| rs17183814 | NP_066287 | R | K | RK | benign            |
| rs17184326 | NP_055844 | N | K | NK | benign            |
| rs17185189 | NP_001163 | H | R | HR | benign            |
| rs17187262 | NP_937762 | T | N | TN | benign            |
| rs17188228 | NP_899243 | I | V | IV | benign            |
| rs17188964 | NP_037432 | R | G | RG | possibly damaging |
| rs17189743 | XP_371494 | R | C | RC | benign            |
| rs17191998 | XP_497522 | R | C | RC | benign            |
| rs17192170 | NP_056161 | T | S | TS | benign            |
| rs17197552 | NP_002709 | S | G | SG | benign            |
| rs17198125 | NP_775760 | E | V | EV | possibly damaging |
| rs17199104 | XP_372376 | D | N | DN | benign            |

|            |           |   |   |    |                   |
|------------|-----------|---|---|----|-------------------|
| rs17201603 | XP_047357 | P | L | PL | benign            |
| rs17202741 | NP_115823 | N | T | NT | benign            |
| rs17202961 | NP_937762 | P | T | PT | possibly damaging |
| rs17203645 | NP_004517 | A | T | AT | benign            |
| rs17204075 | NP_057453 | M | L | ML | benign            |
| rs17204557 | NP_849144 | P | S | PS | possibly damaging |
| rs17208187 | NP_060972 | S | T | ST | benign            |
| rs17208285 | NP_113688 | P | S | PS | benign            |
| rs17208285 | NP_061730 | P | S | PS | benign            |
| rs17208383 | NP_037472 | A | V | AV | benign            |
| rs17208390 | NP_114479 | S | P | SP | benign            |
| rs17208390 | NP_061736 | S | P | SP | benign            |
| rs17208397 | NP_115272 | V | L | VL | benign            |
| rs17208397 | NP_061750 | V | L | VL | benign            |
| rs17209274 | NP_003495 | M | R | MR | probably damaging |
| rs17210864 | XP_497390 | T | A | TA | benign            |
| rs17211285 | XP_063315 | L | F | LF | possibly damaging |
| rs17211369 | NP_009041 | R | Q | RQ | benign            |
| rs17211404 | NP_009041 | K | R | KR | benign            |
| rs17214794 | NP_055426 | M | V | MV | benign            |
| rs17215306 | NP_775494 | L | S | LS | possibly damaging |
| rs17216532 | XP_084482 | A | P | AP | benign            |
| rs17216603 | NP_055614 | A | T | AT | benign            |
| rs17216603 | NP_620074 | A | T | AT | benign            |
| rs17217280 | NP_055129 | D | E | DE | benign            |
| rs17218581 | NP_008974 | R | Q | RQ | benign            |
| rs17218950 | NP_689985 | D | N | DN | benign            |
| rs17219559 | NP_722516 | M | V | MV | benign            |
| rs17220759 | NP_000037 | V | M | VM | benign            |
| rs17220759 | NP_942002 | V | M | VM | benign            |
| rs17220978 | NP_002353 | T | A | TA | benign            |
| rs17221458 | XP_291141 | V | I | VI | benign            |
| rs17221521 | XP_291141 | G | E | GE | possibly damaging |
| rs17221796 | NP_061136 | S | L | SL | benign            |
| rs17223634 | XP_372076 | R | L | RL | benign            |
| rs17224476 | NP_689643 | S | N | SN | benign            |
| rs17224674 | XP_062553 | R | Q | RQ | benign            |
| rs17224810 | NP_059136 | V | I | VI | benign            |
| rs17225637 | NP_055244 | K | M | KM | benign            |
| rs17226367 | NP_002828 | G | A | GA | benign            |
| rs17227996 | NP_002411 | N | T | NT | benign            |
| rs17229136 | NP_003307 | M | T | MT | benign            |
| rs17230134 | NP_945182 | S | G | SG | benign            |
| rs17234326 | XP_372369 | I | T | IT | benign            |
| rs17238798 | NP_653320 | R | W | RW | possibly damaging |
| rs17238800 | NP_060292 | N | S | NS | benign            |

|            |           |   |   |    |                   |
|------------|-----------|---|---|----|-------------------|
| rs17240212 | NP_001141 | I | K | IK | benign            |
| rs17240268 | NP_001141 | A | V | AV | benign            |
| rs17240895 | XP_496854 | P | A | PA | probably damaging |
| rs17243826 | NP_068774 | E | K | EK | benign            |
| rs17244632 | NP_055715 | T | I | TI | benign            |
| rs17245714 | NP_114106 | P | R | PR | benign            |
| rs17246013 | NP_006819 | V | A | VA | benign            |
| rs17248287 | NP_065194 | V | M | VM | benign            |
| rs17248811 | NP_056473 | A | V | AV | benign            |
| rs17249244 | XP_045911 | T | S | TS | benign            |
| rs17253672 | NP_060098 | P | L | PL | benign            |
| rs17254305 | NP_872413 | V | I | VI | benign            |
| rs17255978 | NP_068367 | V | I | VI | benign            |
| rs17255978 | NP_057435 | V | I | VI | benign            |
| rs17255978 | NP_068368 | V | I | VI | benign            |
| rs17255978 | NP_068369 | V | I | VI | benign            |
| rs17257155 | XP_371237 | I | V | IV | benign            |
| rs17258507 | NP_588616 | N | S | NS | possibly damaging |
| rs17258982 | NP_001868 | I | V | IV | benign            |
| rs17259045 | NP_000642 | N | S | NS | benign            |
| rs17259045 | NP_000564 | N | S | NS | benign            |
| rs17259953 | NP_056234 | V | I | VI | benign            |
| rs17260829 | NP_065806 | S | G | SG | benign            |
| rs17261572 | NP_689905 | D | E | DE | benign            |
| rs17262467 | XP_495863 | I | T | IT | possibly damaging |
| rs17263496 | NP_001360 | T | I | TI | possibly damaging |
| rs17263971 | XP_050219 | Q | H | QH | benign            |
| rs17264865 | NP_004640 | V | M | VM | benign            |
| rs17265513 | NP_055850 | N | S | NS | benign            |
| rs17268666 | NP_056167 | L | F | LF | benign            |
| rs17271239 | XP_371586 | N | D | ND | benign            |
| rs17271416 | NP_061918 | A | T | AT | benign            |
| rs17273141 | XP_209163 | L | V | LV | benign            |
| rs17273542 | NP_003820 | S | L | SL | benign            |
| rs17274058 | NP_742023 | T | I | TI | benign            |
| rs17274058 | NP_742021 | T | I | TI | benign            |
| rs17274543 | NP_037506 | V | I | VI | benign            |
| rs17277221 | XP_063315 | Y | H | YH | possibly damaging |
| rs17277228 | XP_063315 | C | R | CR | possibly damaging |
| rs17277270 | XP_372507 | T | S | TS | benign            |
| rs17277288 | NP_005149 | K | R | KR | benign            |
| rs17277288 | NP_009298 | K | R | KR | benign            |
| rs17277522 | XP_292227 | R | H | RH | benign            |
| rs17279437 | NP_064593 | T | M | TM | benign            |
| rs17279712 | NP_056417 | Q | H | QH | possibly damaging |
| rs17280095 | NP_055884 | V | A | VA | benign            |

|            |           |   |   |    |                   |
|------------|-----------|---|---|----|-------------------|
| rs17280293 | NP_065188 | S | G | SG | benign            |
| rs17280682 | NP_789792 | L | F | LF | benign            |
| rs17281055 | XP_498064 | M | K | MK | possibly damaging |
| rs17281139 | NP_777622 | C | R | CR | benign            |
| rs17281188 | NP_277053 | T | M | TM | probably damaging |
| rs17281349 | NP_542179 | P | S | PS | probably damaging |
| rs17281983 | NP_775965 | Y | C | YC | probably damaging |
| rs17282618 | NP_005038 | L | H | LH | probably damaging |
| rs17282855 | XP_040486 | R | K | RK | benign            |
| rs17284963 | NP_085142 | S | G | SG | benign            |
| rs17286758 | NP_078788 | T | A | TA | benign            |
| rs17286758 | NP_079026 | T | A | TA | benign            |
| rs17286891 | NP_061763 | E | K | EK | possibly damaging |
| rs17288108 | NP_067052 | H | Y | HY | benign            |
| rs17290219 | NP_443728 | Q | P | QP | probably damaging |
| rs17292952 | NP_008949 | A | T | AT | benign            |
| rs17293121 | NP_055426 | R | L | RL | possibly damaging |
| rs17293607 | NP_002416 | G | R | GR | benign            |
| rs17293690 | NP_004817 | L | P | LP | possibly damaging |
| rs17293705 | NP_002331 | P | L | PL | probably damaging |
| rs17297951 | NP_057107 | R | Q | RQ | benign            |
| rs17298044 | XP_498210 | E | G | EG | possibly damaging |
| rs17299946 | NP_542454 | I | V | IV | benign            |
| rs17300141 | NP_000895 | G | D | GD | possibly damaging |
| rs17300770 | NP_001494 | D | E | DE | benign            |
| rs17300936 | NP_000553 | P | L | PL | benign            |
| rs17301126 | NP_777557 | T | M | TM | benign            |
| rs17301368 | XP_294328 | G | S | GS | benign            |
| rs17301717 | XP_376254 | S | F | SF | benign            |
| rs17301750 | XP_370652 | T | A | TA | benign            |
| rs17301766 | NP_008958 | S | L | SL | possibly damaging |
| rs17302207 | XP_046531 | R | W | RW | possibly damaging |
| rs17302315 | XP_373252 | S | N | SN | benign            |
| rs17302349 | XP_376254 | Y | C | YC | probably damaging |
| rs17305122 | XP_064903 | R | K | RK | benign            |
| rs17305382 | NP_006819 | R | T | RT | possibly damaging |
| rs17308108 | XP_063308 | L | R | LR | benign            |
| rs17310144 | NP_073594 | P | T | PT | possibly damaging |
| rs17310879 | NP_612565 | F | L | FL | benign            |
| rs17310879 | NP_004847 | F | L | FL | benign            |
| rs17312570 | XP_498374 | A | S | AS | benign            |
| rs17313374 | NP_443198 | V | M | VM | benign            |
| rs17313469 | NP_000283 | E | Q | EQ | benign            |
| rs17313892 | NP_002378 | S | C | SC | benign            |
| rs17314986 | NP_000222 | R | H | RH | probably damaging |
| rs17315645 | NP_009199 | G | E | GE | possibly damaging |

|            |           |   |   |    |                   |
|------------|-----------|---|---|----|-------------------|
| rs17315702 | NP_872431 | C | R | CR | possibly damaging |
| rs17316491 | NP_940912 | W | S | WS | probably damaging |
| rs17318151 | NP_787059 | I | V | IV | benign            |
| rs17318151 | NP_065783 | I | V | IV | benign            |
| rs17318151 | NP_059989 | I | V | IV | benign            |
| rs17322140 | NP_006865 | P | L | PL | probably damaging |
| rs17323082 | NP_064709 | Q | E | QE | benign            |
| rs17323225 | NP_000370 | I | V | IV | benign            |
| rs17324153 | NP_055581 | Q | R | QR | possibly damaging |
| rs17324609 | XP_171424 | A | V | AV | benign            |
| rs17324812 | XP_171424 | T | A | TA | benign            |
| rs17325713 | NP_055178 | A | T | AT | benign            |
| rs17327254 | XP_061627 | F | L | FL | benign            |
| rs17327911 | NP_775493 | K | Q | KQ | benign            |
| rs17328034 | NP_055066 | E | K | EK | benign            |
| rs17328091 | NP_066274 | Q | E | QE | benign            |
| rs17328673 | NP_004052 | I | V | IV | benign            |
| rs17330993 | NP_003909 | R | C | RC | possibly damaging |
| rs17332043 | XP_088735 | R | W | RW | possibly damaging |
| rs17332410 | NP_775789 | L | V | LV | benign            |
| rs17333103 | NP_002629 | T | M | TM | benign            |
| rs17334013 | XP_495929 | V | L | VL | benign            |
| rs17334247 | NP_071348 | P | S | PS | possibly damaging |
| rs17335205 | NP_056234 | P | S | PS | benign            |
| rs17335870 | NP_003105 | E | K | EK | benign            |
| rs17335870 | NP_757367 | E | K | EK | benign            |
| rs17335909 | XP_172801 | R | W | RW | possibly damaging |
| rs17336208 | NP_003463 | V | A | VA | benign            |
| rs17337252 | NP_055596 | T | M | TM | possibly damaging |
| rs17338483 | NP_003590 | D | E | DE | benign            |
| rs17338483 | NP_852001 | D | E | DE | benign            |
| rs17340519 | NP_114100 | Y | H | YH | probably damaging |
| rs17343262 | XP_370567 | I | V | IV | benign            |
| rs17343819 | NP_065094 | N | S | NS | benign            |
| rs17345000 | NP_001664 | E | V | EV | benign            |
| rs17345000 | NP_597680 | E | V | EV | benign            |
| rs17345000 | NP_899199 | E | V | EV | benign            |
| rs17345690 | NP_659498 | T | A | TA | benign            |
| rs17345786 | XP_497928 | N | K | NK | probably damaging |
| rs17346571 | XP_372760 | T | K | TK | benign            |
| rs17347958 | NP_543024 | R | H | RH | possibly damaging |
| rs17348572 | NP_071414 | I | T | IT | benign            |
| rs17350764 | XP_061611 | V | I | VI | possibly damaging |
| rs17350795 | NP_036363 | S | N | SN | benign            |
| rs17350795 | NP_056950 | S | N | SN | benign            |
| rs17351999 | NP_775758 | H | R | HR | probably damaging |

|            |           |   |   |    |                   |
|------------|-----------|---|---|----|-------------------|
| rs17354559 | NP_006090 | S | C | SC | benign            |
| rs17356233 | NP_004275 | H | Q | HQ | possibly damaging |
| rs17357122 | NP_001815 | T | M | TM | benign            |
| rs17360994 | NP_689578 | Q | R | QR | benign            |
| rs17362028 | XP_496859 | L | W | LW | possibly damaging |
| rs17362076 | NP_659427 | A | T | AT | benign            |
| rs17362588 | NP_775919 | R | W | RW | possibly damaging |
| rs17363472 | NP_078779 | Q | H | QH | benign            |
| rs17366743 | NP_004788 | Y | H | YH | benign            |
| rs17366880 | XP_496374 | H | R | HR | benign            |
| rs17368018 | NP_055806 | I | V | IV | benign            |
| rs17368026 | NP_002273 | I | M | IM | possibly damaging |
| rs17368348 | NP_002273 | C | R | CR | possibly damaging |
| rs17368402 | NP_653300 | E | K | EK | possibly damaging |
| rs17368528 | NP_004276 | P | L | PL | probably damaging |
| rs17368556 | NP_004276 | Y | S | YS | probably damaging |
| rs17369441 | NP_877498 | A | V | AV | benign            |
| rs17369441 | NP_653297 | A | V | AV | benign            |
| rs17370297 | NP_056011 | M | T | MT | benign            |
| rs17373919 | XP_376254 | K | Q | KQ | benign            |
| rs17374285 | NP_005495 | T | M | TM | benign            |
| rs17374422 | XP_373252 | L | P | LP | probably damaging |
| rs17374761 | XP_040527 | T | M | TM | benign            |
| rs17375215 | NP_060520 | D | N | DN | benign            |
| rs17375461 | NP_055899 | D | G | DG | benign            |
| rs17379472 | NP_958933 | M | T | MT | benign            |
| rs17379472 | NP_958932 | M | T | MT | benign            |
| rs17379472 | NP_005673 | M | T | MT | benign            |
| rs17383738 | XP_370573 | N | D | ND | benign            |
| rs17384126 | NP_036218 | N | S | NS | benign            |
| rs17386226 | NP_061027 | V | L | VL | benign            |
| rs17388190 | NP_525124 | P | S | PS | probably damaging |
| rs17388443 | NP_000219 | R | W | RW | probably damaging |
| rs17392327 | NP_057656 | P | T | PT | possibly damaging |
| rs17392327 | NP_036607 | P | T | PT | possibly damaging |
| rs17393797 | NP_006608 | R | S | RS | benign            |
| rs17395842 | XP_496813 | E | K | EK | benign            |
| rs17396722 | XP_497684 | G | R | GR | possibly damaging |
| rs17399297 | NP_788954 | D | N | DN | benign            |
| rs17399721 | NP_060423 | G | R | GR | possibly damaging |
| rs17399768 | XP_371480 | I | L | IL | benign            |
| rs17399810 | NP_940949 | S | F | SF | benign            |
| rs17402034 | XP_375024 | R | H | RH | possibly damaging |
| rs17402080 | NP_619526 | E | K | EK | benign            |
| rs17402892 | NP_060921 | S | A | SA | benign            |
| rs17404424 | XP_498075 | V | M | VM | benign            |

|            |           |   |   |    |                   |
|------------|-----------|---|---|----|-------------------|
| rs17405421 | NP_060492 | V | A | VA | benign            |
| rs17406460 | NP_937998 | A | V | AV | benign            |
| rs17406460 | NP_036576 | A | V | AV | benign            |
| rs17407084 | NP_689785 | D | G | DG | possibly damaging |
| rs17407838 | XP_496422 | D | E | DE | benign            |
| rs17409162 | NP_060545 | M | T | MT | possibly damaging |
| rs17409304 | NP_006527 | Q | E | QE | benign            |
| rs17410000 | NP_060826 | T | P | TP | possibly damaging |
| rs17410855 | NP_689713 | V | I | VI | benign            |
| rs17412684 | XP_061427 | P | Q | PQ | probably damaging |
| rs17414086 | NP_056386 | M | T | MT | benign            |
| rs17416074 | NP_005067 | V | I | VI | benign            |
| rs17419546 | NP_000543 | A | T | AT | benign            |
| rs17420230 | NP_115640 | Y | C | YC | probably damaging |
| rs17420378 | NP_006273 | V | M | VM | benign            |
| rs17420650 | XP_497071 | Y | C | YC | probably damaging |
| rs17421133 | NP_115859 | N | I | NI | probably damaging |
| rs17421294 | NP_115859 | R | W | RW | probably damaging |
| rs17422688 | NP_663627 | H | Y | HY | benign            |
| rs17424158 | NP_005923 | R | Q | RQ | benign            |
| rs17428626 | NP_659429 | D | E | DE | benign            |
| rs17429033 | NP_060864 | I | V | IV | benign            |
| rs17429619 | NP_612398 | V | I | VI | benign            |
| rs17430220 | XP_376318 | M | T | MT | benign            |
| rs17430900 | XP_497790 | R | Q | RQ | benign            |
| rs17431446 | XP_495934 | S | L | SL | benign            |
| rs17431878 | NP_057520 | V | M | VM | benign            |
| rs17432496 | NP_065847 | R | H | RH | benign            |
| rs17432615 | NP_056067 | K | Q | KQ | benign            |
| rs17433780 | NP_060754 | C | R | CR | benign            |
| rs17433801 | NP_060754 | V | M | VM | benign            |
| rs17435753 | NP_061060 | P | S | PS | possibly damaging |
| rs17438900 | NP_937822 | F | V | FV | possibly damaging |
| rs17440466 | XP_059482 | L | P | LP | possibly damaging |
| rs17440813 | NP_848551 | I | V | IV | benign            |
| rs17442970 | NP_659484 | V | L | VL | benign            |
| rs17445374 | NP_597730 | D | G | DG | possibly damaging |
| rs17448235 | NP_689737 | I | V | IV | benign            |
| rs17449032 | NP_002017 | I | V | IV | benign            |
| rs17449032 | NP_997639 | I | V | IV | benign            |
| rs17449032 | NP_997640 | I | V | IV | benign            |
| rs17449032 | NP_997641 | I | V | IV | benign            |
| rs17449032 | NP_997643 | I | V | IV | benign            |
| rs17449032 | NP_997647 | I | V | IV | benign            |
| rs17450634 | XP_496703 | V | A | VA | possibly damaging |
| rs17451564 | XP_371778 | T | A | TA | benign            |



|            |           |   |   |    |                   |
|------------|-----------|---|---|----|-------------------|
| rs17454674 | NP_001469 | A | V | AV | benign            |
| rs17459334 | NP_003267 | Q | E | QE | benign            |
| rs17459809 | NP_996672 | G | E | GE | possibly damaging |
| rs17462252 | NP_065186 | S | N | SN | benign            |
| rs17463684 | XP_497680 | V | I | VI | benign            |
| rs17467855 | NP_005579 | V | L | VL | benign            |
| rs17468739 | NP_001538 | E | A | EA | benign            |
| rs17469079 | XP_069616 | S | I | SI | benign            |
| rs17469121 | XP_069616 | S | R | SR | benign            |
| rs17470454 | NP_898862 | P | S | PS | possibly damaging |
| rs17472401 | NP_055917 | R | W | RW | possibly damaging |
| rs17472776 | XP_114301 | L | P | LP | probably damaging |
| rs17475375 | NP_037522 | G | D | GD | benign            |
| rs17475656 | XP_210169 | V | L | VL | benign            |
| rs17475800 | NP_073743 | A | V | AV | possibly damaging |
| rs17476783 | NP_055433 | R | H | RH | benign            |
| rs17479168 | NP_733844 | V | I | VI | benign            |
| rs17481405 | NP_061486 | R | Q | RQ | benign            |
| rs17481405 | NP_005553 | R | Q | RQ | benign            |
| rs17482078 | NP_057526 | Q | R | QR | possibly damaging |
| rs17484219 | NP_057279 | E | D | ED | benign            |
| rs17490221 | NP_004963 | D | E | DE | benign            |
| rs17496835 | NP_954712 | H | Q | HQ | probably damaging |
| rs17497479 | NP_071447 | A | S | AS | benign            |
| rs17500380 | XP_166900 | D | A | DA | possibly damaging |
| rs17501584 | XP_372413 | Q | R | QR | probably damaging |
| rs17502618 | NP_689628 | I | F | IF | benign            |
| rs17502738 | NP_055687 | D | G | DG | possibly damaging |
| rs17502829 | XP_497020 | K | N | KN | benign            |
| rs17503413 | NP_003864 | F | L | FL | possibly damaging |
| rs17506606 | XP_495798 | A | G | AG | benign            |
| rs17506843 | NP_689783 | R | H | RH | possibly damaging |
| rs17507714 | XP_067904 | S | L | SL | possibly damaging |
| rs17509489 | NP_291032 | T | M | TM | benign            |
| rs17511304 | XP_496357 | L | P | LP | probably damaging |
| rs17511668 | NP_060647 | S | I | SI | benign            |
| rs17512204 | NP_061917 | P | L | PL | probably damaging |
| rs17513642 | NP_056969 | H | Y | HY | benign            |
| rs17513722 | XP_291019 | I | V | IV | benign            |
| rs17514547 | NP_006188 | R | H | RH | possibly damaging |
| rs17515016 | NP_872409 | N | D | ND | benign            |
| rs17517260 | NP_067002 | F | S | FS | benign            |
| rs17517578 | NP_071896 | A | T | AT | benign            |
| rs17521570 | NP_056392 | A | T | AT | benign            |
| rs17524906 | NP_056078 | T | M | TM | benign            |
| rs17525809 | NP_002553 | V | A | VA | benign            |

|            |           |   |   |    |                   |
|------------|-----------|---|---|----|-------------------|
| rs17525809 | NP_803176 | V | A | VA | benign            |
| rs17526980 | NP_056069 | V | I | VI | benign            |
| rs17531522 | XP_372391 | I | V | IV | benign            |
| rs17531723 | NP_954984 | V | I | VI | benign            |
| rs17535963 | NP_996830 | T | N | TN | benign            |
| rs17535963 | NP_996829 | T | N | TN | benign            |
| rs17535963 | NP_066003 | T | N | TN | benign            |
| rs17535963 | NP_996828 | T | N | TN | benign            |
| rs17535963 | NP_996827 | T | N | TN | benign            |
| rs17535963 | NP_079247 | T | N | TN | benign            |
| rs17536349 | NP_849150 | E | D | ED | benign            |
| rs17540213 | XP_037817 | S | C | SC | possibly damaging |
| rs17541107 | NP_722581 | L | M | LM | benign            |
| rs17541405 | NP_055684 | V | I | VI | benign            |
| rs17544587 | XP_059384 | P | S | PS | benign            |
| rs17545756 | NP_009119 | R | C | RC | probably damaging |
| rs17546579 | XP_043118 | I | V | IV | benign            |
| rs17546822 | XP_085634 | Q | R | QR | benign            |
| rs17547207 | XP_497294 | V | L | VL | benign            |
| rs17550713 | NP_079055 | V | A | VA | possibly damaging |
| rs17551608 | NP_056053 | R | C | RC | possibly damaging |
| rs17554211 | NP_037495 | P | T | PT | benign            |
| rs17554462 | NP_001803 | F | L | FL | benign            |
| rs17555920 | NP_077816 | E | K | EK | benign            |
| rs17556966 | NP_997382 | G | A | GA | benign            |
| rs17558193 | NP_777612 | Y | H | YH | benign            |
| rs17558532 | NP_853515 | A | T | AT | benign            |
| rs17558560 | NP_853515 | G | S | GS | benign            |
| rs17558995 | NP_853513 | A | T | AT | benign            |
| rs17561762 | NP_004770 | L | P | LP | benign            |
| rs17563089 | NP_079339 | N | S | NS | benign            |
| rs17563407 | XP_498198 | N | S | NS | benign            |
| rs17563617 | NP_060725 | T | P | TP | benign            |
| rs17570718 | NP_149033 | K | T | KT | benign            |
| rs17572019 | NP_573570 | V | I | VI | benign            |
| rs17574839 | NP_006150 | N | D | ND | benign            |
| rs17575212 | NP_000177 | N | T | NT | benign            |
| rs17577109 | NP_001609 | P | S | PS | benign            |
| rs17578364 | XP_034086 | F | V | FV | benign            |
| rs17579447 | NP_005897 | D | E | DE | benign            |
| rs17579502 | XP_088551 | L | F | LF | benign            |
| rs17581133 | NP_004743 | P | A | PA | possibly damaging |
| rs17581141 | NP_004249 | R | Q | RQ | benign            |
| rs17583782 | NP_002109 | T | A | TA | benign            |
| rs17584642 | NP_036221 | R | G | RG | possibly damaging |
| rs17585974 | NP_056258 | K | T | KT | benign            |

|            |           |   |   |    |                   |
|------------|-----------|---|---|----|-------------------|
| rs17586516 | XP_497978 | R | Q | RQ | possibly damaging |
| rs17587634 | NP_660346 | I | V | IV | benign            |
| rs17591320 | NP_660301 | H | Y | HY | benign            |
| rs17593501 | XP_496962 | S | R | SR | benign            |
| rs17594503 | NP_003610 | R | Q | RQ | benign            |
| rs17596156 | XP_497064 | R | W | RW | benign            |
| rs17597625 | NP_006628 | R | G | RG | benign            |
| rs17598321 | NP_078802 | M | I | MI | benign            |
| rs17598321 | NP_573444 | M | I | MI | benign            |
| rs17598321 | NP_620641 | M | I | MI | benign            |
| rs17599091 | NP_000244 | Q | E | QE | benign            |
| rs17599410 | XP_208320 | V | L | VL | benign            |
| rs17599639 | NP_001363 | R | H | RH | probably damaging |
| rs17600994 | XP_373030 | E | Q | EQ | benign            |
| rs17601580 | NP_005012 | S | N | SN | benign            |
| rs17602409 | XP_166420 | I | M | IM | benign            |
| rs17603649 | NP_065868 | R | W | RW | possibly damaging |
| rs17604693 | NP_004406 | I | F | IF | benign            |
| rs17605622 | NP_619643 | S | L | SL | benign            |
| rs17605670 | NP_000837 | T | S | TS | benign            |
| rs17609459 | NP_005791 | A | P | AP | benign            |
| rs17610219 | NP_114162 | Y | H | YH | benign            |
| rs17610395 | NP_001867 | A | T | AT | benign            |
| rs17611716 | NP_001547 | A | T | AT | benign            |
| rs17611765 | XP_376679 | D | E | DE | benign            |
| rs17611866 | NP_694573 | V | A | VA | benign            |
| rs17612126 | NP_002171 | T | K | TK | benign            |
| rs17612341 | NP_066024 | R | P | RP | possibly damaging |
| rs17612861 | NP_001363 | D | N | DN | benign            |
| rs17612861 | NP_004653 | D | N | DN | benign            |
| rs17614393 | XP_062890 | I | T | IT | probably damaging |
| rs17615477 | XP_061871 | V | F | VF | benign            |
| rs17616226 | NP_057615 | R | S | RS | benign            |
| rs17616661 | NP_056308 | M | T | MT | benign            |
| rs17616994 | NP_872298 | T | M | TM | possibly damaging |
| rs17617270 | NP_996763 | A | V | AV | benign            |
| rs17617321 | NP_002109 | S | N | SN | benign            |
| rs17617333 | NP_002109 | D | V | DV | benign            |
| rs17617459 | NP_056994 | G | S | GS | possibly damaging |
| rs17618244 | NP_783864 | R | Q | RQ | benign            |
| rs17618262 | NP_783864 | Y | H | YH | benign            |
| rs17618630 | XP_496300 | R | Q | RQ | possibly damaging |
| rs17619568 | NP_075383 | A | V | AV | benign            |
| rs17621411 | NP_689976 | A | V | AV | benign            |
| rs17623803 | NP_644810 | E | Q | EQ | benign            |
| rs17624798 | NP_569732 | I | T | IT | possibly damaging |

|            |           |   |   |    |                   |
|------------|-----------|---|---|----|-------------------|
| rs17624860 | NP_001803 | D | G | DG | benign            |
| rs17625943 | NP_733828 | A | T | AT | benign            |
| rs17629834 | NP_071888 | P | T | PT | possibly damaging |
| rs17630362 | NP_872425 | A | V | AV | benign            |
| rs17630836 | NP_954976 | I | M | IM | benign            |
| rs17632542 | NP_001639 | I | T | IT | benign            |
| rs17632786 | NP_003237 | N | S | NS | possibly damaging |
| rs17634387 | XP_371755 | W | R | WR | probably damaging |
| rs17634853 | XP_371755 | R | Q | RQ | benign            |
| rs17634865 | XP_371755 | P | S | PS | benign            |
| rs17635381 | NP_006188 | A | S | AS | benign            |
| rs17636067 | NP_004306 | V | I | VI | benign            |
| rs17636067 | NP_808592 | V | I | VI | benign            |
| rs17637304 | XP_497370 | T | I | TI | possibly damaging |
| rs17637756 | NP_001482 | P | R | PR | probably damaging |
| rs17641067 | NP_055514 | I | M | IM | benign            |
| rs17641078 | NP_870987 | E | Q | EQ | benign            |
| rs17641488 | NP_115761 | R | H | RH | benign            |
| rs17645232 | NP_005145 | D | G | DG | probably damaging |
| rs17646069 | NP_821077 | V | A | VA | benign            |
| rs17646274 | XP_292197 | L | P | LP | probably damaging |
| rs17646457 | NP_037363 | R | Q | RQ | benign            |
| rs17647207 | XP_370651 | A | T | AT | benign            |
| rs17647302 | NP_733796 | P | L | PL | probably damaging |
| rs17647302 | NP_775299 | P | L | PL | probably damaging |
| rs17647302 | NP_777480 | P | L | PL | probably damaging |
| rs17647806 | NP_006742 | P | L | PL | benign            |
| rs17648128 | NP_861454 | S | N | SN | benign            |
| rs17650440 | NP_061198 | P | L | PL | probably damaging |
| rs17651549 | NP_058519 | R | W | RW | possibly damaging |
| rs17653122 | XP_293923 | I | T | IT | benign            |
| rs17653152 | XP_293923 | P | T | PT | possibly damaging |
| rs17653265 | NP_000156 | A | V | AV | benign            |
| rs17653374 | NP_060325 | I | T | IT | benign            |
| rs17654693 | XP_497629 | M | K | MK | benign            |
| rs17655123 | NP_056495 | P | L | PL | probably damaging |
| rs17656320 | NP_870989 | Y | F | YF | possibly damaging |
| rs17656320 | NP_870990 | Y | F | YF | possibly damaging |
| rs17656320 | NP_000835 | Y | F | YF | possibly damaging |
| rs17656599 | NP_056013 | P | L | PL | benign            |
| rs17658935 | XP_166450 | A | G | AG | benign            |
| rs17659073 | NP_055256 | K | E | KE | benign            |
| rs17659179 | XP_371116 | K | N | KN | benign            |
| rs17660042 | NP_861439 | R | H | RH | possibly damaging |
| rs17661626 | NP_113689 | A | V | AV | benign            |
| rs17661626 | NP_061731 | A | V | AV | benign            |

|            |           |   |   |    |                   |
|------------|-----------|---|---|----|-------------------|
| rs17662853 | NP_056258 | T | I | TI | benign            |
| rs17664065 | XP_496963 | R | Q | RQ | benign            |
| rs17665219 | XP_496227 | Q | R | QR | benign            |
| rs17665299 | XP_371192 | G | S | GS | benign            |
| rs17667603 | NP_068813 | R | S | RS | probably damaging |
| rs17667857 | NP_055059 | E | K | EK | benign            |
| rs17670506 | NP_004067 | R | Q | RQ | possibly damaging |
| rs17670870 | NP_777637 | T | S | TS | benign            |
| rs17672542 | NP_689621 | I | T | IT | benign            |
| rs17673268 | NP_982272 | A | V | AV | benign            |
| rs17673844 | XP_497249 | A | G | AG | benign            |
| rs17674097 | NP_065121 | G | A | GA | benign            |
| rs17674449 | NP_056998 | A | V | AV | benign            |
| rs17677811 | XP_031689 | C | R | CR | probably damaging |
| rs17677991 | XP_031689 | P | A | PA | possibly damaging |
| rs17678945 | NP_006112 | A | S | AS | benign            |
| rs17679445 | NP_060599 | R | Q | RQ | benign            |
| rs17679537 | XP_290865 | R | K | RK | benign            |
| rs17680541 | XP_496300 | K | T | KT | benign            |
| rs17680844 | NP_002771 | L | V | LV | benign            |
| rs17680844 | NP_998798 | L | V | LV | benign            |
| rs17680862 | XP_290684 | S | T | ST | benign            |
| rs17681684 | NP_004237 | D | N | DN | benign            |
| rs17681870 | NP_003695 | I | V | IV | benign            |
| rs17681908 | NP_006624 | R | W | RW | probably damaging |
| rs17683011 | NP_000334 | N | S | NS | benign            |
| rs17683012 | XP_497949 | V | M | VM | benign            |
| rs17683288 | NP_055444 | S | A | SA | benign            |
| rs17683306 | XP_048786 | R | H | RH | possibly damaging |
| rs17683430 | NP_000334 | A | T | AT | benign            |
| rs17684500 | NP_653275 | M | T | MT | benign            |
| rs17684521 | NP_759018 | N | S | NS | possibly damaging |
| rs17684521 | NP_525022 | N | S | NS | possibly damaging |
| rs17685098 | NP_892018 | R | W | RW | possibly damaging |
| rs17685450 | NP_006596 | Y | C | YC | possibly damaging |
| rs17685621 | NP_061762 | Y | H | YH | probably damaging |
| rs17686210 | XP_166780 | K | R | KR | benign            |
| rs17686437 | NP_064542 | M | T | MT | benign            |
| rs17686569 | NP_061142 | Q | R | QR | benign            |
| rs17686569 | NP_758424 | Q | R | QR | benign            |
| rs17687375 | NP_689628 | I | V | IV | benign            |
| rs17688097 | XP_496799 | R | Q | RQ | benign            |
| rs17688567 | NP_115532 | P | S | PS | probably damaging |
| rs17688567 | NP_076414 | P | S | PS | probably damaging |
| rs17688627 | NP_787028 | A | V | AV | possibly damaging |
| rs17688672 | NP_787028 | H | R | HR | benign            |

|            |           |   |   |    |                   |
|------------|-----------|---|---|----|-------------------|
| rs17688948 | NP_004860 | I | M | IM | benign            |
| rs17689215 | NP_071396 | M | V | MV | benign            |
| rs17690195 | NP_003793 | R | Q | RQ | benign            |
| rs17690300 | NP_003194 | E | D | ED | benign            |
| rs17690844 | XP_372031 | K | T | KT | benign            |
| rs17690899 | NP_828848 | A | G | AG | benign            |
| rs17694469 | NP_113610 | S | N | SN | benign            |
| rs17694549 | NP_079379 | L | F | LF | possibly damaging |
| rs17694720 | NP_004295 | F | S | FS | possibly damaging |
| rs17694739 | NP_003165 | A | V | AV | benign            |
| rs17694739 | NP_068506 | A | V | AV | benign            |
| rs17695181 | XP_497591 | Q | P | QP | benign            |
| rs17695651 | XP_497639 | R | G | RG | benign            |
| rs17696719 | XP_496895 | I | V | IV | benign            |
| rs17697947 | NP_002153 | I | V | IV | benign            |
| rs17698526 | NP_001175 | R | Q | RQ | benign            |
| rs17699016 | NP_055033 | F | V | FV | possibly damaging |
| rs17699678 | NP_060322 | T | M | TM | possibly damaging |
| rs17703111 | NP_115958 | Y | C | YC | probably damaging |
| rs17704703 | XP_373461 | Q | P | QP | benign            |
| rs17704912 | NP_115997 | W | S | WS | probably damaging |
| rs17705609 | NP_689475 | L | S | LS | benign            |
| rs17707331 | NP_443193 | S | N | SN | benign            |
| rs17707947 | NP_036466 | V | I | VI | benign            |
| rs17710008 | NP_079383 | G | S | GS | benign            |
| rs17710336 | NP_848639 | V | E | VE | possibly damaging |
| rs17710891 | NP_005622 | D | H | DH | possibly damaging |
| rs17711594 | NP_000431 | Q | H | QH | benign            |
| rs17711777 | NP_060354 | T | A | TA | benign            |
| rs17712523 | NP_071407 | V | I | VI | benign            |
| rs17713154 | NP_443193 | I | V | IV | benign            |
| rs17714046 | NP_963921 | Y | H | YH | benign            |
| rs17714854 | NP_689676 | F | L | FL | benign            |
| rs17715486 | XP_209554 | C | R | CR | probably damaging |
| rs17715634 | XP_209554 | D | E | DE | benign            |
| rs17716134 | XP_292784 | T | I | TI | benign            |
| rs17716635 | XP_209728 | E | Q | EQ | benign            |
| rs17717676 | XP_496553 | S | T | ST | benign            |
| rs17718987 | NP_056532 | Q | E | QE | benign            |
| rs17719249 | NP_689500 | R | W | RW | probably damaging |
| rs17719289 | NP_001762 | S | G | SG | benign            |
| rs17719808 | NP_777576 | T | A | TA | benign            |
| rs17721059 | NP_075408 | R | Q | RQ | benign            |
| rs17721059 | NP_004073 | R | Q | RQ | benign            |
| rs17721307 | NP_006056 | M | I | MI | benign            |
| rs17722293 | NP_078853 | G | E | GE | possibly damaging |

|            |           |   |   |    |                   |
|------------|-----------|---|---|----|-------------------|
| rs17723260 | NP_004943 | V | M | VM | benign            |
| rs17723640 | NP_060257 | A | S | AS | benign            |
| rs17725080 | NP_006034 | P | A | PA | possibly damaging |
| rs17725914 | NP_055680 | K | R | KR | benign            |
| rs17727261 | NP_620549 | S | L | SL | possibly damaging |
| rs17727261 | NP_570129 | S | L | SL | probably damaging |
| rs17728193 | NP_008862 | V | L | VL | benign            |
| rs17728850 | NP_006677 | M | T | MT | benign            |
| rs17729088 | NP_003062 | R | H | RH | benign            |
| rs17729088 | NP_620636 | R | H | RH | benign            |
| rs17729483 | NP_003062 | N | S | NS | benign            |
| rs17729483 | NP_620636 | N | S | NS | benign            |
| rs17730267 | NP_612418 | K | T | KT | benign            |
| rs17731347 | NP_002408 | T | S | TS | benign            |
| rs17731958 | XP_085234 | S | L | SL | benign            |
| rs17733239 | NP_000167 | N | S | NS | benign            |
| rs17735609 | XP_497781 | R | Q | RQ | benign            |
| rs17736370 | NP_758857 | C | Y | CY | probably damaging |
| rs17736699 | NP_068547 | E | D | ED | benign            |
| rs17736699 | NP_055080 | E | D | ED | benign            |
| rs17736699 | NP_068548 | E | D | ED | benign            |
| rs17737530 | NP_112167 | A | V | AV | benign            |
| rs17737708 | XP_498072 | V | F | VF | benign            |
| rs17737832 | XP_375646 | D | N | DN | possibly damaging |
| rs17738527 | NP_777637 | E | K | EK | possibly damaging |
| rs17738540 | NP_777637 | V | M | VM | benign            |
| rs17740066 | XP_045911 | V | I | VI | benign            |
| rs17740607 | NP_002103 | T | M | TM | possibly damaging |
| rs17741424 | NP_536341 | E | V | EV | possibly damaging |
| rs17741424 | NP_004565 | E | V | EV | possibly damaging |
| rs17742683 | NP_001923 | R | G | RG | probably damaging |
| rs17743814 | NP_795370 | F | S | FS | benign            |
| rs17743887 | NP_073210 | V | M | VM | benign            |
| rs17744245 | NP_116561 | A | V | AV | benign            |
| rs17744624 | NP_005650 | P | A | PA | benign            |
| rs17745209 | XP_371192 | I | S | IS | possibly damaging |
| rs17745302 | NP_078903 | R | H | RH | benign            |
| rs17745550 | NP_114034 | M | V | MV | benign            |
| rs17745550 | NP_002365 | M | V | MV | benign            |
| rs17746949 | XP_290811 | V | M | VM | benign            |
| rs17747505 | NP_828848 | R | W | RW | possibly damaging |
| rs17747633 | NP_733468 | K | E | KE | benign            |
| rs17747633 | NP_653091 | K | E | KE | benign            |
| rs17748456 | NP_004397 | S | L | SL | benign            |
| rs17748869 | NP_002025 | T | M | TM | possibly damaging |
| rs17750158 | NP_002783 | P | Q | PQ | probably damaging |

|            |           |   |   |    |                   |
|------------|-----------|---|---|----|-------------------|
| rs17750870 | NP_005551 | G | A | GA | possibly damaging |
| rs17751013 | NP_060738 | R | C | RC | possibly damaging |
| rs17751061 | NP_757386 | R | H | RH | possibly damaging |
| rs17752285 | XP_170754 | T | S | TS | benign            |
| rs17754559 | XP_376720 | V | M | VM | benign            |
| rs17755373 | NP_061852 | P | L | PL | probably damaging |
| rs17756598 | XP_371846 | E | D | ED | benign            |
| rs17756963 | XP_497611 | E | Q | EQ | benign            |
| rs17757442 | NP_612140 | R | K | RK | benign            |
| rs17758402 | XP_497482 | S | N | SN | benign            |
| rs17759447 | XP_166780 | A | V | AV | benign            |
| rs17759513 | XP_166780 | G | S | GS | benign            |
| rs17759929 | XP_375633 | V | L | VL | benign            |
| rs17759933 | NP_002166 | K | E | KE | benign            |
| rs17761023 | NP_644804 | A | V | AV | benign            |
| rs17761023 | NP_003479 | A | V | AV | benign            |
| rs17761055 | NP_056097 | I | T | IT | benign            |
| rs17761586 | NP_060651 | E | D | ED | benign            |
| rs17762338 | NP_060419 | R | H | RH | possibly damaging |
| rs17762452 | NP_055900 | L | M | LM | benign            |
| rs17762463 | NP_612190 | A | T | AT | benign            |
| rs17762463 | NP_066984 | A | T | AT | benign            |
| rs17762463 | NP_612191 | A | T | AT | benign            |
| rs17762735 | NP_055380 | V | M | VM | benign            |
| rs17762763 | NP_079234 | S | C | SC | benign            |
| rs17763658 | NP_787078 | R | Q | RQ | benign            |
| rs17766354 | NP_878918 | P | A | PA | possibly damaging |
| rs17768776 | XP_035371 | S | N | SN | benign            |
| rs17769294 | NP_060795 | N | S | NS | benign            |
| rs17769294 | NP_659442 | N | S | NS | benign            |
| rs17769417 | XP_497316 | Q | R | QR | possibly damaging |
| rs17773251 | NP_660204 | R | S | RS | benign            |
| rs17773851 | XP_096317 | R | L | RL | benign            |
| rs17775030 | NP_002195 | I | F | IF | benign            |
| rs17775030 | NP_005492 | I | F | IF | benign            |
| rs17776197 | XP_497012 | R | C | RC | probably damaging |
| rs17776256 | NP_060269 | A | S | AS | benign            |
| rs17776919 | NP_683412 | T | A | TA | benign            |
| rs17776919 | NP_057588 | T | A | TA | benign            |
| rs17778003 | NP_065914 | G | R | GR | benign            |
| rs17778270 | XP_034594 | A | V | AV | benign            |
| rs17779353 | XP_209155 | I | T | IT | benign            |
| rs17780143 | NP_006566 | T | M | TM | probably damaging |
| rs17780143 | NP_942089 | T | M | TM | probably damaging |
| rs17781919 | NP_003735 | G | D | GD | benign            |
| rs17782052 | XP_090885 | E | K | EK | benign            |



|            |           |   |   |    |                   |
|------------|-----------|---|---|----|-------------------|
| rs17782078 | NP_036202 | I | T | IT | possibly damaging |
| rs17782078 | NP_647538 | I | T | IT | possibly damaging |
| rs17782078 | NP_647537 | I | T | IT | possibly damaging |
| rs17782124 | NP_919254 | P | L | PL | benign            |
| rs17782220 | XP_496826 | S | R | SR | benign            |
| rs17782413 | NP_003775 | R | Q | RQ | benign            |
| rs17782839 | NP_055196 | S | P | SP | benign            |
| rs17783344 | NP_036330 | S | A | SA | benign            |
| rs17783366 | NP_443105 | N | D | ND | benign            |
| rs17783943 | NP_003110 | F | C | FC | possibly damaging |
| rs17784152 | NP_004941 | S | C | SC | benign            |
| rs17787670 | XP_172341 | T | M | TM | benign            |
| rs17787698 | NP_066567 | Y | C | YC | probably damaging |
| rs17790310 | XP_495930 | D | G | DG | possibly damaging |
| rs17790493 | XP_376518 | S | C | SC | benign            |
| rs17791052 | NP_002228 | I | M | IM | benign            |
| rs17791076 | NP_758529 | Y | H | YH | possibly damaging |
| rs17791076 | NP_002228 | Y | H | YH | possibly damaging |
| rs17791931 | NP_000753 | L | H | LH | probably damaging |
| rs17793043 | NP_705840 | I | N | IN | possibly damaging |
| rs17794522 | XP_375397 | E | G | EG | possibly damaging |
| rs17797650 | XP_497781 | P | R | PR | probably damaging |
| rs17797703 | NP_004468 | T | A | TA | benign            |
| rs17799675 | XP_498072 | G | E | GE | benign            |
| rs17800159 | NP_004939 | V | I | VI | benign            |
| rs17800159 | NP_077739 | V | I | VI | benign            |
| rs17800261 | NP_689567 | S | N | SN | benign            |
| rs17800727 | NP_005602 | Y | C | YC | probably damaging |
| rs17801309 | NP_005224 | R | H | RH | possibly damaging |
| rs17801815 | XP_495906 | K | Q | KQ | benign            |
| rs17802155 | NP_003010 | S | T | ST | benign            |
| rs17802282 | XP_497637 | Q | E | QE | benign            |
| rs17803441 | NP_110407 | R | H | RH | benign            |
| rs17804362 | NP_002408 | T | S | TS | benign            |
| rs17804499 | NP_958834 | A | G | AG | benign            |
| rs17804854 | NP_848658 | T | I | TI | possibly damaging |
| rs17807567 | XP_087225 | A | D | AD | possibly damaging |
| rs17807673 | NP_116781 | P | L | PL | possibly damaging |
| rs17807723 | NP_057405 | R | C | RC | benign            |
| rs17809527 | XP_062269 | R | Q | RQ | benign            |
| rs17810488 | XP_374949 | L | R | LR | possibly damaging |
| rs17811401 | NP_008981 | M | V | MV | benign            |
| rs17811401 | NP_573400 | M | V | MV | benign            |
| rs17811673 | NP_006443 | K | N | KN | benign            |
| rs17812218 | XP_496322 | I | T | IT | benign            |
| rs17812681 | NP_114116 | R | H | RH | possibly damaging |

|            |           |   |   |    |                   |
|------------|-----------|---|---|----|-------------------|
| rs17812681 | NP_872292 | R | H | RH | possibly damaging |
| rs17812699 | NP_114116 | P | L | PL | probably damaging |
| rs17812699 | NP_872292 | P | L | PL | probably damaging |
| rs17813036 | XP_371846 | S | G | SG | possibly damaging |
| rs17813964 | NP_073737 | T | S | TS | benign            |
| rs17815774 | NP_002411 | V | M | VM | benign            |
| rs17817145 | NP_852094 | Y | C | YC | possibly damaging |
| rs17818730 | NP_060395 | T | A | TA | benign            |
| rs17818842 | NP_003175 | P | L | PL | probably damaging |
| rs17818852 | XP_497792 | Y | C | YC | benign            |
| rs17819126 | NP_570722 | V | I | VI | benign            |
| rs17819211 | NP_477352 | M | V | MV | possibly damaging |
| rs17819796 | NP_620050 | V | I | VI | benign            |
| rs17819796 | NP_110393 | V | I | VI | benign            |
| rs17819796 | NP_620049 | V | I | VI | benign            |
| rs17825668 | NP_076984 | I | T | IT | possibly damaging |
| rs17826038 | NP_789761 | L | V | LV | benign            |
| rs17826219 | NP_079133 | R | K | RK | benign            |
| rs17827158 | NP_002340 | K | R | KR | benign            |
| rs17827619 | NP_078857 | D | N | DN | benign            |
| rs17828795 | NP_945320 | A | S | AS | benign            |
| rs17828795 | NP_945321 | A | S | AS | benign            |
| rs17828795 | NP_001121 | A | S | AS | benign            |
| rs17829458 | NP_071931 | Q | E | QE | benign            |
| rs17831160 | NP_002371 | V | I | VI | benign            |
| rs17831160 | NP_085072 | V | I | VI | benign            |
| rs17831525 | NP_031387 | P | S | PS | probably damaging |
| rs17832431 | NP_060264 | I | V | IV | benign            |
| rs17832998 | NP_057735 | A | V | AV | benign            |
| rs17833723 | NP_003479 | R | C | RC | benign            |
| rs17833723 | NP_644804 | R | C | RC | probably damaging |
| rs17833992 | XP_044622 | V | L | VL | benign            |
| rs17834415 | XP_292109 | F | I | FI | benign            |
| rs17834554 | NP_057729 | L | F | LF | benign            |
| rs17834692 | NP_056139 | P | S | PS | possibly damaging |
| rs17836040 | NP_775801 | P | R | PR | possibly damaging |
| rs17836273 | NP_116069 | A | T | AT | benign            |
| rs17837470 | NP_945341 | D | N | DN | benign            |
| rs17837492 | XP_380044 | R | Q | RQ | benign            |
| rs17837518 | XP_069743 | I | V | IV | benign            |
| rs17838066 | NP_001550 | L | R | LR | possibly damaging |
| rs17838148 | XP_496386 | R | H | RH | possibly damaging |
| rs17838150 | NP_997301 | G | V | GV | probably damaging |
| rs17838151 | NP_997301 | P | L | PL | possibly damaging |
| rs17838156 | NP_000841 | V | A | VA | benign            |
| rs17838156 | NP_671489 | V | A | VA | benign            |

|            |           |   |   |    |                   |
|------------|-----------|---|---|----|-------------------|
| rs17838158 | NP_000841 | A | V | AV | benign            |
| rs17838158 | NP_671489 | A | V | AV | benign            |
| rs17838409 | NP_056542 | V | M | VM | benign            |
| rs17838624 | NP_112603 | H | R | HR | probably damaging |
| rs17838624 | NP_001623 | R | H | RH | probably damaging |
| rs17838626 | NP_005190 | Q | H | QH | probably damaging |
| rs17839493 | NP_000878 | F | L | FL | probably damaging |
| rs17839741 | NP_061753 | L | V | LV | benign            |
| rs17839873 | NP_112167 | A | T | AT | benign            |
| rs17839963 | NP_005505 | R | S | RS | benign            |
| rs17840047 | NP_005505 | E | V | EV | benign            |
| rs17840048 | NP_005505 | N | K | NK | benign            |
| rs17840060 | NP_005505 | N | D | ND | benign            |
| rs17840079 | NP_002107 | A | S | AS | benign            |
| rs17840082 | NP_005505 | R | W | RW | probably damaging |
| rs17840089 | NP_976034 | T | I | TI | benign            |
| rs17840089 | NP_002692 | T | I | TI | benign            |
| rs17840401 | XP_208361 | I | V | IV | benign            |
| rs17840571 | NP_003044 | G | R | GR | possibly damaging |
| rs17840712 | XP_212241 | L | P | LP | possibly damaging |
| rs17840712 | XP_212238 | P | L | PL | possibly damaging |
| rs17840717 | XP_212238 | E | Q | EQ | benign            |
| rs17841119 | XP_497450 | S | A | SA | benign            |
| rs17841203 | XP_370838 | K | Q | KQ | benign            |
| rs17841203 | XP_058720 | Q | K | QK | benign            |
| rs17841224 | NP_077078 | Q | K | QK | benign            |
| rs17841224 | NP_003285 | Q | K | QK | benign            |
| rs17841225 | NP_077078 | K | N | KN | benign            |
| rs17841225 | NP_003285 | N | K | NK | benign            |
| rs17841226 | NP_077078 | P | R | PR | benign            |
| rs17841226 | NP_003285 | P | R | PR | benign            |
| rs17841227 | NP_077078 | G | D | GD | benign            |
| rs17841227 | NP_003285 | G | D | GD | benign            |
| rs17841228 | NP_077078 | H | R | HR | benign            |
| rs17841228 | NP_003285 | H | R | HR | benign            |
| rs17841256 | NP_775745 | S | P | SP | probably damaging |
| rs17841292 | NP_037434 | P | A | PA | probably damaging |
| rs17841788 | NP_783313 | V | F | VF | benign            |
| rs17841930 | XP_496031 | H | R | HR | benign            |
| rs17841930 | XP_375148 | R | H | RH | benign            |
| rs17841948 | NP_068818 | V | M | VM | benign            |
| rs17841949 | NP_002115 | G | S | GS | benign            |
| rs17841949 | NP_072049 | G | S | GS | benign            |
| rs17841949 | NP_068818 | S | G | SG | benign            |
| rs17841949 | NP_002116 | S | G | SG | benign            |
| rs17841952 | NP_068818 | N | S | NS | benign            |

|            |           |   |   |    |                   |
|------------|-----------|---|---|----|-------------------|
| rs17841952 | NP_002115 | S | N | SN | benign            |
| rs17841952 | NP_072049 | S | N | SN | benign            |
| rs17841953 | NP_002115 | R | L | RL | benign            |
| rs17841953 | NP_068818 | R | L | RL | benign            |
| rs17841953 | NP_002116 | R | L | RL | benign            |
| rs17841953 | NP_072049 | R | Q | RQ | benign            |
| rs17841954 | NP_002115 | A | T | AT | benign            |
| rs17841954 | NP_068818 | A | T | AT | benign            |
| rs17842463 | NP_814444 | P | L | PL | probably damaging |
| rs17842465 | NP_814444 | M | I | MI | benign            |
| rs17842465 | NP_004596 | M | I | MI | possibly damaging |
| rs17842601 | NP_005865 | H | R | HR | benign            |
| rs17843015 | NP_872303 | F | S | FS | benign            |
| rs17843015 | XP_496218 | F | S | FS | probably damaging |
| rs17843021 | NP_998821 | T | M | TM | benign            |
| rs17843022 | NP_998821 | R | Q | RQ | benign            |
| rs17843023 | NP_998821 | L | M | LM | benign            |
| rs17862125 | NP_694544 | G | E | GE | possibly damaging |
| rs17862414 | NP_036581 | I | M | IM | benign            |
| rs17862493 | NP_036581 | L | V | LV | benign            |
| rs17862559 | NP_149098 | N | D | ND | benign            |
| rs17862586 | NP_036581 | I | V | IV | benign            |
| rs17862586 | NP_997225 | V | I | VI | benign            |
| rs17862627 | XP_087225 | A | D | AD | possibly damaging |
| rs17862841 | NP_061949 | A | V | AV | benign            |
| rs17862843 | NP_061949 | A | V | AV | benign            |
| rs17862867 | NP_061951 | H | Y | HY | benign            |
| rs17862868 | NP_061951 | V | L | VL | benign            |
| rs17863046 | NP_694544 | D | Y | DY | probably damaging |
| rs17863543 | NP_061951 | G | R | GR | benign            |
| rs17863762 | NP_061949 | C | Y | CY | probably damaging |
| rs17863779 | NP_061950 | W | R | WR | benign            |
| rs17863822 | NP_060880 | S | T | ST | benign            |
| rs17863827 | XP_087225 | P | S | PS | possibly damaging |
| rs17863999 | NP_149098 | M | I | MI | benign            |
| rs17864457 | NP_061966 | V | A | VA | benign            |
| rs17864694 | NP_061951 | L | F | LF | benign            |
| rs17864695 | NP_061951 | R | K | RK | benign            |
| rs17864822 | NP_066307 | V | E | VE | possibly damaging |
| rs17864845 | NP_061949 | S | C | SC | benign            |
| rs17864846 | NP_066307 | M | V | MV | benign            |
| rs17864846 | NP_061949 | M | V | MV | benign            |
| rs17864847 | NP_001063 | S | Y | SY | possibly damaging |
| rs17864883 | XP_087225 | Q | K | QK | benign            |
| rs17864906 | NP_061949 | D | H | DH | benign            |
| rs17864908 | NP_009051 | P | T | PT | benign            |

|            |           |   |   |    |                   |
|------------|-----------|---|---|----|-------------------|
| rs17865475 | NP_079064 | T | M | TM | benign            |
| rs17865569 | NP_789784 | L | V | LV | benign            |
| rs17865585 | NP_149098 | K | R | KR | benign            |
| rs17865719 | XP_087225 | H | Q | HQ | possibly damaging |
| rs17865959 | NP_079064 | P | L | PL | probably damaging |
| rs17866324 | NP_036581 | D | N | DN | benign            |
| rs17866635 | NP_009051 | L | V | LV | benign            |
| rs17866645 | NP_066307 | E | D | ED | benign            |
| rs17866645 | NP_061949 | E | D | ED | benign            |
| rs17866684 | NP_061951 | L | I | LI | benign            |
| rs17866712 | NP_061951 | L | S | LS | benign            |
| rs17866722 | NP_061948 | E | K | EK | possibly damaging |
| rs17866726 | NP_066307 | A | P | AP | benign            |
| rs17866726 | NP_000454 | A | P | AP | benign            |
| rs17866726 | NP_009051 | A | P | AP | benign            |
| rs17866726 | NP_061966 | A | P | AP | benign            |
| rs17866726 | NP_061951 | A | P | AP | benign            |
| rs17866726 | NP_061950 | A | P | AP | benign            |
| rs17866726 | NP_061948 | A | P | AP | benign            |
| rs17866726 | NP_061949 | A | P | AP | benign            |
| rs17866726 | NP_995584 | A | P | AP | possibly damaging |
| rs17867481 | NP_149098 | S | C | SC | possibly damaging |
| rs17867575 | NP_036581 | K | E | KE | benign            |
| rs17868054 | NP_036581 | F | L | FL | benign            |
| rs17868092 | NP_061951 | D | E | DE | benign            |
| rs17868323 | NP_061950 | N | K | NK | benign            |
| rs17868324 | NP_061950 | R | Q | RQ | benign            |
| rs17869158 | NP_061966 | W | R | WR | benign            |
| rs17869185 | NP_061949 | L | M | LM | benign            |
| rs17869195 | NP_061949 | N | D | ND | benign            |
| rs17869928 | NP_036581 | L | S | LS | benign            |
